# Supplementary material
Source: Research Square preprint supplement (doi:10.21203/rs.3.rs-9927928/v1)
Supplement: Supplementary file 1 [file 167859f1bf84870c8874cbd0.xlsx]

## Sheet: Summary of datasets
Supplementary Table 1. Summary of sequencing datasets analyzed in this study.
Dataset ID	Sequencing run ID	Sample ID	Assay type	Source sample	Cell line name (in manuscript)	Background
mESC_GPSeq_Rep1_T1	PRJEB112822	ERS30300768	GPSeq	mESC	TX1072 mESC	C57BL/6J x CAST/EiJ
mESC_GPSeq_Rep1_T2	PRJEB112822	ERS30300769	GPSeq	mESC	TX1072 mESC	C57BL/6J x CAST/EiJ
mESC_GPSeq_Rep1_T3	PRJEB112822	ERS30300770	GPSeq	mESC	TX1072 mESC	C57BL/6J x CAST/EiJ
mESC_GPSeq_Rep1_T4	PRJEB112822	ERS30300771	GPSeq	mESC	TX1072 mESC	C57BL/6J x CAST/EiJ
mESC_GPSeq_Rep1_T5	PRJEB112822	ERS30300772	GPSeq	mESC	TX1072 mESC	C57BL/6J x CAST/EiJ
mESC_GPSeq_Rep1_T6	PRJEB112822	ERS30300773	GPSeq	mESC	TX1072 mESC	C57BL/6J x CAST/EiJ
mESC_GPSeq_Rep2_T1	PRJEB112822	ERS30300774	GPSeq	mESC	J1 mESC	129S4/SvJae
mESC_GPSeq_Rep2_T2	PRJEB112822	ERS30300775	GPSeq	mESC	J1 mESC	129S4/SvJae
mESC_GPSeq_Rep2_T3	PRJEB112822	ERS30300776	GPSeq	mESC	J1 mESC	129S4/SvJae
mESC_GPSeq_Rep2_T4	PRJEB112822	ERS30300777	GPSeq	mESC	J1 mESC	129S4/SvJae
mESC_GPSeq_Rep2_T5	PRJEB112822	ERS30300778	GPSeq	mESC	J1 mESC	129S4/SvJae
mESC_GPSeq_Rep2_T6	PRJEB112822	ERS30300779	GPSeq	mESC	J1 mESC	129S4/SvJae
mNPC_GPSeq_Rep1_T1	PRJEB112822	ERS30300780	GPSeq	mNPC	TX1072 derived mNPC clone 5	C57BL/6J x CAST/EiJ
mNPC_GPSeq_Rep1_T2	PRJEB112822	ERS30300781	GPSeq	mNPC	TX1072 derived mNPC clone 5	C57BL/6J x CAST/EiJ
mNPC_GPSeq_Rep1_T3	PRJEB112822	ERS30300782	GPSeq	mNPC	TX1072 derived mNPC clone 5	C57BL/6J x CAST/EiJ
mNPC_GPSeq_Rep1_T4	PRJEB112822	ERS30300783	GPSeq	mNPC	TX1072 derived mNPC clone 5	C57BL/6J x CAST/EiJ
mNPC_GPSeq_Rep1_T5	PRJEB112822	ERS30300784	GPSeq	mNPC	TX1072 derived mNPC clone 5	C57BL/6J x CAST/EiJ
mNPC_GPSeq_Rep1_T6	PRJEB112822	ERS30300785	GPSeq	mNPC	TX1072 derived mNPC clone 5	C57BL/6J x CAST/EiJ
mNPC_GPSeq_Rep1_T7	PRJEB112822	ERS30300786	GPSeq	mNPC	TX1072 derived mNPC clone 5	C57BL/6J x CAST/EiJ
mNPC_GPSeq_Rep1_T8	PRJEB112822	ERS30300787	GPSeq	mNPC	TX1072 derived mNPC clone 5	C57BL/6J x CAST/EiJ
mNPC_GPSeq_Rep2_T1	PRJEB112822	ERS30300788	GPSeq	mNPC	TX1072 derived mNPC clone 5	C57BL/6J x CAST/EiJ
mNPC_GPSeq_Rep2_T2	PRJEB112822	ERS30300789	GPSeq	mNPC	TX1072 derived mNPC clone 5	C57BL/6J x CAST/EiJ
mNPC_GPSeq_Rep2_T3	PRJEB112822	ERS30300790	GPSeq	mNPC	TX1072 derived mNPC clone 5	C57BL/6J x CAST/EiJ
mNPC_GPSeq_Rep2_T4	PRJEB112822	ERS30300791	GPSeq	mNPC	TX1072 derived mNPC clone 5	C57BL/6J x CAST/EiJ
mNPC_GPSeq_Rep2_T5	PRJEB112822	ERS30300792	GPSeq	mNPC	TX1072 derived mNPC clone 5	C57BL/6J x CAST/EiJ
mNPC_GPSeq_Rep2_T6	PRJEB112822	ERS30300793	GPSeq	mNPC	TX1072 derived mNPC clone 5	C57BL/6J x CAST/EiJ
mNPC_GPSeq_Rep2_T7	PRJEB112822	ERS30300794	GPSeq	mNPC	TX1072 derived mNPC clone 5	C57BL/6J x CAST/EiJ
mNPC_GPSeq_Rep2_T8	PRJEB112822	ERS30300795	GPSeq	mNPC	TX1072 derived mNPC clone 5	C57BL/6J x CAST/EiJ
mESC_ATAC_Rep1	PRJNA1186175	SRR31352514	ATAC-seq	mESC	mESC E14TG2a	129/Ola
mESC_ATAC_Rep2	PRJNA1186175	SRR31352515	ATAC-seq	mESC	mESC E14TG2a	129/Ola
mESC_ATAC_Rep3	PRJNA1186175	SRR31352516	ATAC-seq	mESC	mESC E14TG2a	129/Ola
mNPC_ATAC_Rep1	PRJEB112822	ERS30300799	ATAC-seq	mNPC	TX1072 derived mNPC clone 5	C57BL/6J x CAST/EiJ
mNPC_ATAC_Rep2	PRJEB112822	ERS30300800	ATAC-seq	mNPC	TX1072 derived mNPC clone 5	C57BL/6J x CAST/EiJ
mESC_HiC_Rep1	PRJEB112822	ERS30300796	Hi-C	mESC	J1 mESC	129S4/SvJae
mNPC_HiC_Rep1	PRJEB112822	ERS30300797	Hi-C	mNPC	TX1072 derived mNPC clone 5	C57BL/6J x CAST/EiJ
mNPC_HiC_Rep2	PRJEB112822	ERS30300798	Hi-C	mNPC	TX1072 derived mNPC clone 5	C57BL/6J x CAST/EiJ
mESC_RNA_Rep1	PRJNA478782	SRR7458994	RNA-seq	mESC	TX1072 mESC	C57BL/6J x CAST/EiJ
mESC_RNA_Rep2	PRJNA478782	SRR7458995	RNA-seq	mESC	TX1072 mESC	C57BL/6J x CAST/EiJ
mNPC_RNA_Rep1	GSE330320	GSM9723693	RNA-seq	mNPC	TX1072 derived mNPC clone 5	C57BL/6J x CAST/EiJ
mNPC_RNA_Rep2	GSE330320	GSM9723694	RNA-seq	mNPC	TX1072 derived mNPC clone 5	C57BL/6J x CAST/EiJ

## Sheet: Datasets Information
Read numbers before and after data processing
Dataset ID	Num Reads	Barcode (GPSeq)	Read Length	Pre-Processed And Mapped Reads	Phased Reads	Phased Reads (%)	Demultiplexed Reads	Valid Hi-C contacts	Phased Valid Hi-C contacts
mESC_GPSeq_Rep1_T1	70695824	CATCACGC	150	25009279	-	-	12329865	-	-
mESC_GPSeq_Rep1_T2	69170832	GTCGTCGC	150	27311007	-	-	16658578	-	-
mESC_GPSeq_Rep1_T3	54459191	ACGACCGC	150	20609963	-	-	15241318	-	-
mESC_GPSeq_Rep1_T4	77200584	TGATGCGC	150	33970380	-	-	28088095	-	-
mESC_GPSeq_Rep1_T5	83869685	CATCAATC	150	33350686	-	-	28138933	-	-
mESC_GPSeq_Rep1_T6	80076259	GTCGTATC	150	32712766	-	-	28495006	-	-
mESC_GPSeq_Rep2_T1	67113306	CATCACGC	75	34279654	-	-	23455413	-	-
mESC_GPSeq_Rep2_T2	66709805	GTCGTCGC	75	35096957	-	-	27699594	-	-
mESC_GPSeq_Rep2_T3	49918964	ACGACCGC	75	27602805	-	-	10187469	-	-
mESC_GPSeq_Rep2_T4	85703220	TGATGCGC	75	50892434	-	-	41041176	-	-
mESC_GPSeq_Rep2_T5	58055835	CATCAATC	75	27672276	-	-	24710074	-	-
mESC_GPSeq_Rep2_T6	63591509	GTCGTATC	75	34242068	-	-	31490542	-	-
mNPC_GPSeq_Rep1_T1	120252933	GTCGTATC	300	28874239	18946133	0.65616	6109668	-	-
mNPC_GPSeq_Rep1_T2	147112629	GTCGTATC	300	39619903	26010404	0.656498	6893871	-	-
mNPC_GPSeq_Rep1_T3	150731701	GTCGTATC	300	33631151	21782770	0.647696	7553508	-	-
mNPC_GPSeq_Rep1_T4	157182127	GTCGTATC	300	47097349	30997430	0.658157	9937713	-	-
mNPC_GPSeq_Rep1_T5	206849012	GTCGTATC	300	56821276	37136585	0.653568	10805326	-	-
mNPC_GPSeq_Rep1_T6	274461631	GTCGTATC	300	69252632	45106489	0.651332	11304031	-	-
mNPC_GPSeq_Rep1_T7	287752244	GTCGTATC	300	36496246	23934289	0.655801	5951012	-	-
mNPC_GPSeq_Rep1_T8	347436206	GTCGTATC	300	31373216	20414045	0.650684	5910745	-	-
mNPC_GPSeq_Rep2_T1	38255507	CATCACGC	300	18085822	11586067	0.640616	5405356	-	-
mNPC_GPSeq_Rep2_T2	23370989	GTCGTATC	300	11124735	7085875	0.636948	3451604	-	-
mNPC_GPSeq_Rep2_T3	25082504	ACGACCGC	300	12700823	8169067	0.643192	5721485	-	-
mNPC_GPSeq_Rep2_T4	36557930	CATCACGC	300	18680833	12015050	0.643175	7803698	-	-
mNPC_GPSeq_Rep2_T5	65706288	GTCGTATC	300	34602919	22380931	0.646793	14789307	-	-
mNPC_GPSeq_Rep2_T6	104589059	ACGACCGC	300	55883543	36206274	0.647888	22513646	-	-
mNPC_GPSeq_Rep2_T7	120732183	CATCACGC	300	64193215	41792445	0.651041	25951044	-	-
mNPC_GPSeq_Rep2_T8	173282261	GTCGTATC	300	89941504	58772927	0.653457	41595139	-	-
mESC_ATAC_Rep1	105070002	-	150	79185338	-	-	-	-	-
mESC_ATAC_Rep2	99981764	-	150	73824874	-	-	-	-	-
mESC_ATAC_Rep3	101828729	-	150	70183205	-	-	-	-	-
mNPC_ATAC_Rep1	60915076	-	150	44127507	21345523	0.4837	-	-	-
mNPC_ATAC_Rep2	59093797	-	150	41969726	18248808	0.4348	-	-	-
mESC_HiC_Rep1	1437028688	-	150	838726599	-	-	-	583791685	-
mNPC_HiC_Rep1 + Rep2 (pool)	736966256	-	150	288262774	89384215	0.31	-	200690970	45863561
mESC_RNA_Rep1	22991326	-	100	19374866	-	-	-	-	-
mESC_RNA_Rep2	19558625	-	100	16351760	-	-	-	-	-
mNPC_RNA_Rep1	150633129	-	80	126318183	40721067	0.3224	-	-	-
mNPC_RNA_Rep2	83709340	-	80	70380172	23572099	0.3349	-	-	-
Phased GPSeq – Read numbers before and after phasing
Dataset ID	PhasedReads_B6	PhasedReads_CAST	PercentPhased_B6	PercentPhased_CAST	TotalPhasedPercentage	FinalPostProcessing_B6	FinalPostProcessing_CAST
mNPC_GPSeq_Rep1_T1	10706299	8239834	37.08	28.54	65.62	1556810	1228835
mNPC_GPSeq_Rep1_T2	14667522	11342882	37.02	28.63	65.65	2012936	1594118
mNPC_GPSeq_Rep1_T3	12243884	9538886	36.41	28.36	64.77	2048786	1626158
mNPC_GPSeq_Rep1_T4	17435258	13562172	37.02	28.8	65.82	3038867	2406290
mNPC_GPSeq_Rep1_T5	20877835	16258750	36.74	28.61	65.35	4259390	3367894
mNPC_GPSeq_Rep1_T6	25406490	19699999	36.69	28.45	65.14	4309535	3394047
mNPC_GPSeq_Rep1_T7	13492871	10441418	36.97	28.61	65.58	2838593	2223992
mNPC_GPSeq_Rep1_T8	11493644	8920401	36.64	28.43	65.07	2425242	1904757
mNPC_GPSeq_Rep2_T1	6617733	4968334	36.59	27.47	64.06	1118164	856316
mNPC_GPSeq_Rep2_T2	4044871	3041004	36.36	27.34	63.7	708531	546273
mNPC_GPSeq_Rep2_T3	4642048	3527019	36.55	27.77	64.32	1178934	906205
mNPC_GPSeq_Rep2_T4	6825889	5189161	36.54	27.78	64.32	1598306	1237218
mNPC_GPSeq_Rep2_T5	12874167	9506764	37.21	27.47	64.68	3106730	2326659
mNPC_GPSeq_Rep2_T6	20663290	15542984	36.98	27.81	64.79	4735020	3612936
mNPC_GPSeq_Rep2_T7	23938613	17853832	37.29	27.81	65.1	5510724	4163369
mNPC_GPSeq_Rep2_T8	33713706	25059221	37.48	27.86	65.34	8866342	6664673
