# Supplementary material
Source: Research Square preprint supplement (doi:10.21203/rs.3.rs-9927928/v1)
Supplement: Supplementary file 2 [file 48f2ab3894e6709c63a6b9bd.xlsx]

## Sheet: Suppl Table 2
Supplementary Table 2. GPSeq scores and RNA-seq counts in mESC and mNPC.
Gene Name	Ensembl ID	Gene Biotype	Genomic bin	TPM mESC	TPM mNPC	Log2FC TPM	rGS mESC	rGS mNPC	delta rGS	Top 1000
0610005C13Rik	ENSMUSG00000109644.4	lncRNA	chr7_45200000	2.2211	0.0055	-1.6797	0.967	0.9309	-0.0361	.
0610006L08Rik	ENSMUSG00000108652.3	lncRNA	chr7_74450000	0	0	0	0.4314	0.4585	0.0271	.
0610009E02Rik	ENSMUSG00000086714.4	lncRNA	chr2_26350000	0.0658	0.1454	0.104	0.999	0.9544	-0.0446	.
0610009L18Rik	ENSMUSG00000043644.7	lncRNA	chr11_120200000	2.7847	4.4108	0.5157	0.9903	0.9761	-0.0142	.
0610010K14Rik	ENSMUSG00000020831.19	protein_coding	chr11_70100000	0	0.0784	0.1088	0.9386	0.9444	0.0057	.
0610012D04Rik	ENSMUSG00000089755.2	lncRNA	chr17_87650000	0.2425	0.0185	-0.2868	0.9069	0.8633	-0.0436	.
0610025J13Rik	ENSMUSG00000046683.18	lncRNA	chr4_98200000	0	0.1029	0.1414	0.5128	0.8233	0.3104	Top
0610030E20Rik	ENSMUSG00000058706.6	protein_coding	chr6_72300000	13.5605	29.0968	1.0476	0.8139	0.9577	0.1437	.
0610031O16Rik	ENSMUSG00000099146.8	lncRNA	chr3_137900000	0	0	0	0.5688	0.5616	-0.0072	.
0610033M10Rik	ENSMUSG00000108236.3	lncRNA	chr6_51400000	0.0213	0.0013	-0.0285	0.8486	0.9257	0.0771	.
0610038B21Rik	ENSMUSG00000097882.5	lncRNA	chr8_78200000	0.043	0.0951	0.0703	0.6606	0.701	0.0404	.
0610039K10Rik	ENSMUSG00000058812.4	lncRNA	chr2_163450000	0.1603	0.4191	0.2905	0.7539	0.7537	-0.0002	.
0610040B10Rik	ENSMUSG00000089889.5	lncRNA	chr5_143300000	1.3831	10.3845	2.2562	0.9126	0.8338	-0.0788	.
0610040F04Rik	ENSMUSG00000087341.6	lncRNA	chr6_108550000	0.3305	0.0503	-0.3411	0.5364	0.6736	0.1372	.
0610040J01Rik	ENSMUSG00000060512.8	protein_coding	chr5_63950000	0.044	0.0055	-0.0543	0.6284	0.5312	-0.0973	.
0610043K17Rik	ENSMUSG00000087361.9	lncRNA	chr4_101200000	0.0524	0.005	-0.0665	0.6441	0.7559	0.1118	.
0710001A04Rik	ENSMUSG00000114511.2	lncRNA	chr18_25800000	0	0.031	0.044	0.7823	0.5154	-0.2669	.
1010001B22Rik	ENSMUSG00000097863.3	lncRNA	chr5_110100000	0.0759	0.2805	0.2512	0.5386	0.2718	-0.2668	.
1100001I12Rik	ENSMUSG00000115547.3	lncRNA	chr15_38650000	0	0	0	0.7963	0.9095	0.1131	.
1110002E22Rik	ENSMUSG00000090066.3	protein_coding	chr3_137750000	0.0227	0.0116	-0.0157	0.6345	0.6413	0.0068	.
1110002J07Rik	ENSMUSG00000097134.4	lncRNA	chr10_66750000	2.8698	4.4283	0.4882	0.6359	0.86	0.2241	.
1110002L01Rik	ENSMUSG00000071456.9	lncRNA	chr12_3450000	3.2524	2.7493	-0.1817	0.9081	0.8481	-0.06	.
1110002O04Rik	ENSMUSG00000102531.3	lncRNA	chr1_35850000	0.003	0.0027	-0.0005	0.8879	0.5483	-0.3395	.
1110004F10Rik	ENSMUSG00000030663.13	protein_coding	chr7_115600000	2.6692	10.9591	1.7046	0.485	0.7156	0.2306	.
1110006O24Rik	ENSMUSG00000107121.4	lncRNA	chr5_115750000	6.4661	22.878	1.6773	0.9924	0.8652	-0.1272	.
1110008E08Rik	ENSMUSG00000046119.3	lncRNA	chr16_90350000	0.2304	0	-0.2991	0.7934	0.7361	-0.0573	.
1110015O18Rik	ENSMUSG00000098659.10	lncRNA	chr3_4850000	0	0.3467	0.4294	0.2994	0.2056	-0.0937	.
1110018N20Rik	ENSMUSG00000085151.9	lncRNA	chr2_167000000	0.2125	1.4401	1.009	0.9862	0.8984	-0.0878	.
1110019B22Rik	ENSMUSG00000112289.3	lncRNA	chr10_95550000	0.1784	0	-0.2368	0.6037	0.6644	0.0607	.
1110019D14Rik	ENSMUSG00000097616.10	lncRNA	chr6_13900000	0.0377	0.077	0.0537	0.4394	0.246	-0.1934	.
1110020A21Rik	ENSMUSG00000097047.4	lncRNA	chr17_85200000	0.004	0.1738	0.2255	0.7588	0.6495	-0.1093	.
1110028F11Rik	ENSMUSG00000085972.3	lncRNA	chr11_87550000	0	0.006	0.0086	0.8538	0.8624	0.0086	.
1110028F18Rik	ENSMUSG00000099139.3	lncRNA	chr8_107250000	0.0055	0.0012	-0.0062	0.931	0.7468	-0.1842	.
1110032F04Rik	ENSMUSG00000046999.3	protein_coding	chr3_68750000	2.6555	0.6837	-1.1184	0.7498	0.6936	-0.0563	.
1110035H17Rik	ENSMUSG00000099098.7	lncRNA	chr7_28850000	0.7351	1.1937	0.3384	0.9793	0.823	-0.1563	.
1110038B12Rik	ENSMUSG00000092203.10	lncRNA	chr17_35150000	28.6456	8.2496	-1.6804	0.9972	0.919	-0.0782	.
1110038F14Rik	ENSMUSG00000063236.7	protein_coding	chr15_76800000	21.1276	142.93	2.7015	0.9086	0.9586	0.05	.
1110046J04Rik	ENSMUSG00000085457.6	lncRNA	chr13_34100000	0.0219	0.0079	-0.0199	0.6244	0.6042	-0.0202	.
1110058D11Rik	ENSMUSG00000128076.1	lncRNA	chr17_64300000	0	0	0	0.4047	0.5961	0.1914	.
1110059E24Rik	ENSMUSG00000035171.10	protein_coding	chr19_21600000	0.7131	1.5949	0.5991	0.6648	0.7637	0.0989	.
1110059G10Rik	ENSMUSG00000032551.8	protein_coding	chr9_122750000	3.3188	20.9887	2.3481	0.7198	0.5981	-0.1217	.
1110065P20Rik	ENSMUSG00000078570.11	protein_coding	chr4_124700000	5.3357	127.58	4.343	0.979	0.8517	-0.1273	.
1190001M18Rik	ENSMUSG00000111857.2	lncRNA	chr11_82850000	0	0	0	0.7992	0.4371	-0.362	.
1190005I06Rik	ENSMUSG00000043687.17	protein_coding	chr8_121300000	0.0213	0.0235	0.0031	0.8925	0.9423	0.0499	.
1190028D05Rik	ENSMUSG00000110013.3	lncRNA	chr8_52800000	0.1093	0	-0.1497	0.2083	0.046	-0.1623	.
1200007C13Rik	ENSMUSG00000087684.3	lncRNA	chr2_167650000	0	0	0	0.9965	0.9171	-0.0794	.
1300002E11Rik	ENSMUSG00000097290.11	lncRNA	chr16_21600000	4.7896	2.5497	-0.7057	0.8757	0.8767	0.001	.
1300014J16Rik	ENSMUSG00000112545.4	lncRNA	chr12_80150000	0.3308	0.191	-0.1601	0.7996	0.9882	0.1885	.
1500002C15Rik	ENSMUSG00000096221.5	lncRNA	chr4_155800000	0.095	2.4104	1.639	0.977	0.86	-0.1171	.
1500002F19Rik	ENSMUSG00000097595.4	lncRNA	chr7_132450000	0.0351	0.0415	0.0089	0.7849	0.8357	0.0508	.
1500004A13Rik	ENSMUSG00000098912.10	lncRNA	chr3_88650000	0.0326	0.4409	0.4807	0.9404	0.982	0.0416	.
1500009L16Rik	ENSMUSG00000087651.4	protein_coding	chr10_83550000	0.4185	2.1978	1.1727	0.9058	0.7751	-0.1307	.
1500012K07Rik	ENSMUSG00000097247.4	lncRNA	chr7_74950000	0	0	0	0.5503	0.5621	0.0118	.
1500015A07Rik	ENSMUSG00000098702.3	lncRNA	chr18_61850000	0.7058	1.3998	0.4925	0.8738	0.8529	-0.0209	.
1500015L24Rik	ENSMUSG00000094732.5	lncRNA	chr19_20300000	0	0.0123	0.0177	0.5858	0.4074	-0.1784	.
1500026H17Rik	ENSMUSG00000097383.4	lncRNA	chr10_89500000	0	0.3258	0.4069	0.5242	0.5337	0.0095	.
1500032F14Rik	ENSMUSG00000117718.4	lncRNA	chr19_4250000	0.0209	0.0382	0.0243	0.9955	0.9648	-0.0307	.
1500035N22Rik	ENSMUSG00000059631.9	lncRNA	chr5_25200000	0.0135	0	-0.0193	0.926	0.8869	-0.0391	.
1600002D24Rik	ENSMUSG00000117232.3	lncRNA	chr16_95700000	0.0223	0.0012	-0.03	0.9114	0.6499	-0.2614	.
1600010M07Rik	ENSMUSG00000101585.9	lncRNA	chr7_109650000	0.0023	0.0003	-0.0029	0.6523	0.9416	0.2893	Top
1600012H06Rik	ENSMUSG00000050088.10	protein_coding	chr17_15150000	2.6698	13.4484	1.9771	0.7469	0.7323	-0.0145	.
1600012P17Rik	ENSMUSG00000047661.10	lncRNA	chr1_158800000	0	0.0056	0.0081	0.3711	0.2633	-0.1079	.
1600014C10Rik	ENSMUSG00000054676.18	protein_coding	chr7_37850000	1.407	2.3372	0.4714	0.8219	0.7692	-0.0528	.
1600014C23Rik	ENSMUSG00000094690.3	protein_coding	chr17_46000000	1.0187	9.4899	2.3775	0.9671	0.9508	-0.0162	.
1600019K03Rik	ENSMUSG00000099429.3	lncRNA	chr16_35300000	0	0.0036	0.0052	0.7955	0.8382	0.0426	.
1600020E01Rik	ENSMUSG00000097048.10	lncRNA	chr6_86500000	0.7994	1.0548	0.1915	0.7935	0.902	0.1086	.
1600022D10Rik	ENSMUSG00000117315.3	lncRNA	chr17_71450000	0	0.0006	0.0009	0.6884	0.6362	-0.0522	.
1600025M17Rik	ENSMUSG00000085114.2	protein_coding	chrX_55350000	0	0	0	0.5381	0.4926	-0.0455	.
1600027J07Rik	ENSMUSG00000110340.3	lncRNA	chr8_104000000	0.0042	0.0009	-0.0048	0.2876	0.3791	0.0915	.
1600029O15Rik	ENSMUSG00000121691.1	lncRNA	chr9_58100000	0.0563	0	-0.0791	0.9733	0.9894	0.016	.
1700001D01Rik	ENSMUSG00000099419.2	lncRNA	chr8_61700000	0	0	0	0.6225	0.7286	0.1062	.
1700001G01Rik	ENSMUSG00000087170.9	lncRNA	chr18_17150000	0	0.0003	0.0005	0.5248	0.1785	-0.3463	.
1700001G11Rik	ENSMUSG00000085984.10	lncRNA	chr14_66500000	0.2808	1.1523	0.7488	0.8286	0.7638	-0.0648	.
1700001J03Rik	ENSMUSG00000095040.3	protein_coding	chr5_146100000	0.0582	0.8899	0.8368	0.5225	0.4676	-0.055	.
1700001J04Rik	ENSMUSG00000086135.3	lncRNA	chr11_114050000	0	0	0	0.8689	0.5149	-0.354	.
1700001K19Rik	ENSMUSG00000056508.7	protein_coding	chr12_110600000	0.0946	0.0028	-0.1264	0.9702	0.9735	0.0033	.
1700001K23Rik	ENSMUSG00000118314.3	lncRNA	chr19_53200000	0.0137	0.0006	-0.0188	0.7663	0.7619	-0.0045	.
1700001L05Rik	ENSMUSG00000075511.12	lncRNA	chr15_83200000	12.0068	1.838	-2.1963	0.973	0.8141	-0.1588	.
1700001N15Rik	ENSMUSG00000106210.2	lncRNA	chr3_143100000	0	0	0	0.3962	0.2663	-0.1299	.
1700001O22Rik	ENSMUSG00000044320.15	protein_coding	chr2_30650000	3.7859	2.1703	-0.5942	0.9909	0.968	-0.0229	.
1700003C15Rik	ENSMUSG00000099391.4	lncRNA	chr5_11800000	0	0	0	0.7845	0.1276	-0.6569	Bottom
1700003D09Rik	ENSMUSG00000085944.3	lncRNA	chr11_98200000	0.044	0	-0.0622	0.9972	0.9673	-0.0299	.
1700003E16Rik	ENSMUSG00000030030.6	protein_coding	chr6_83100000	0.2352	1.677	1.1158	0.8917	0.9099	0.0182	.
1700003E24Rik	ENSMUSG00000095110.3	lncRNA	chrX_92200000	0	0	0	0.2789	0.3902	0.1113	.
1700003F12Rik	ENSMUSG00000038523.11	protein_coding	chr2_154350000	0.2989	0.9846	0.6115	0.9096	0.8962	-0.0134	.
1700003G18Rik	ENSMUSG00000087621.9	lncRNA	chr7_115650000	0.0567	0.0407	-0.022	0.4818	0.7052	0.2234	.
1700003H04Rik	ENSMUSG00000039174.16	protein_coding	chr3_124350000	0	0	0	0.2692	0.1052	-0.164	.
1700003I16Rik	ENSMUSG00000107526.2	lncRNA	chr6_149100000	0	0	0	0.5459	0.3852	-0.1607	.
1700003I22Rik	ENSMUSG00000100372.3	lncRNA	chr1_56050000	0	0	0	0.4641	0.2273	-0.2368	.
1700003L19Rik	ENSMUSG00000101565.4	lncRNA	chr16_12600000	0.0085	0	-0.0122	0.8481	0.5908	-0.2572	.
1700003M07Rik	ENSMUSG00000085389.10	lncRNA	chr4_129850000	0.5424	2.1787	1.0432	0.9955	0.9186	-0.0768	.
1700003O11Rik	ENSMUSG00000118311.3	lncRNA	chr18_76100000	0	0	0	0.8421	0.8496	0.0075	.
1700003P14Rik	ENSMUSG00000100727.8	lncRNA	chr13_118650000	0	0	0	0.0743	0.0212	-0.053	.
1700006A11Rik	ENSMUSG00000027973.12	protein_coding	chr3_124150000	0	0	0	0.1709	0.0722	-0.0987	.
1700006F04Rik	ENSMUSG00000100274.3	lncRNA	chr14_119950000	0.1465	0	-0.1972	0.3999	0.1024	-0.2975	.
1700006H21Rik	ENSMUSG00000102000.8	lncRNA	chr13_107800000	0	0.0072	0.0103	0.7373	0.832	0.0948	.
1700006J14Rik	ENSMUSG00000034764.17	lncRNA	chr10_120150000	0.041	0.0004	-0.0573	0.7684	0.9331	0.1647	.
1700007F19Rik	ENSMUSG00000100666.3	lncRNA	chr3_58000000	0.0037	0.0021	-0.0023	0.5602	0.6926	0.1325	.
1700007H22Rik	ENSMUSG00000116556.3	lncRNA	chr16_85850000	0	0	0	0.0332	0.3514	0.3182	Top
1700007J10Rik	ENSMUSG00000086330.9	lncRNA	chr11_59600000	0.0246	0.005	-0.0279	0.9768	0.9189	-0.0579	.
1700007L15Rik	ENSMUSG00000097318.5	lncRNA	chr16_33200000	2.5512	1.6362	-0.4299	0.7557	0.9545	0.1988	.
1700007P06Rik	ENSMUSG00000089730.4	lncRNA	chr1_186850000	0.1466	0.0187	-0.1706	0.4564	0.4126	-0.0437	.
1700008B11Rik	ENSMUSG00000104872.3	lncRNA	chr5_121950000	0.2762	0.1829	-0.1095	0.999	0.9803	-0.0187	.
1700008C04Rik	ENSMUSG00000111986.3	lncRNA	chr12_51100000	0.0029	0	-0.0041	0.5058	0.3494	-0.1564	.
1700008J07Rik	ENSMUSG00000101225.3	lncRNA	chr7_127100000	12.0714	10.0276	-0.2453	0.9412	0.9831	0.042	.
1700008K24Rik	ENSMUSG00000101012.8	lncRNA	chr17_49400000	0	0	0	0.6809	0.2044	-0.4765	Bottom
1700008N11Rik	ENSMUSG00000109657.3	lncRNA	chr8_28550000	0	0	0	0.3618	0.1646	-0.1971	.
1700008O03Rik	ENSMUSG00000008028.16	protein_coding	chr7_44000000	0.555	0.1453	-0.4412	0.9854	0.899	-0.0864	.
1700008P02Rik	ENSMUSG00000069118.5	lncRNA	chr3_6650000	0	0	0	0.1946	0.1612	-0.0333	.
1700009C05Rik	ENSMUSG00000101404.3	lncRNA	chr6_81850000	0.0094	0	-0.0135	0.6793	0.4014	-0.2779	.
1700009J07Rik	ENSMUSG00000096573.5	lncRNA	chr10_77700000	0	0	0	0.9855	0.593	-0.3924	.
1700009N14Rik	ENSMUSG00000028287.5	protein_coding	chr4_39450000	0	0	0	0.2952	0.1243	-0.1709	.
1700010B08Rik	ENSMUSG00000057047.7	lncRNA	chr2_173550000	0	0.0145	0.0208	0.9472	0.5613	-0.3859	.
1700010B13Rik	ENSMUSG00000099958.3	lncRNA	chr15_73450000	0.0064	0.0025	-0.0057	0.9775	0.9046	-0.0729	.
1700010D01Rik	ENSMUSG00000071721.6	lncRNA	chrX_94750000	0	0	0	0.3402	0.4688	0.1286	.
1700010G06Rik	ENSMUSG00000115752.3	lncRNA	chr15_64150000	0.2338	0.1548	-0.0954	0.6598	0.7942	0.1344	.
1700010H22Rik	ENSMUSG00000067101.7	lncRNA	chr5_98700000	0	0.033	0.0468	0.3188	0.1278	-0.1909	.
1700010I02Rik	ENSMUSG00000100010.7	lncRNA	chr3_8000000	0.0112	0	-0.0161	0.5077	0.0953	-0.4124	.
1700010I14Rik	ENSMUSG00000023873.14	protein_coding	chr17_9200000	0.0756	0.111	0.0468	0.8412	0.7856	-0.0556	.
1700010J16Rik	ENSMUSG00000100314.8	lncRNA	chr10_112550000	0	0	0	0.1789	0.0898	-0.0891	.
1700010K23Rik	ENSMUSG00000092599.3	lncRNA	chr16_66450000	0	0	0	0.0054	0.1319	0.1265	.
1700010K24Rik	ENSMUSG00000085102.3	lncRNA	chr3_108150000	0.0869	0.0667	-0.0271	0.7034	0.9436	0.2402	.
1700010L04Rik	ENSMUSG00000030636.17	lncRNA	chr7_82550000	0.0038	0.0007	-0.0045	0.6531	0.5508	-0.1023	.
1700011B04Rik	ENSMUSG00000102099.4	lncRNA	chr13_35350000	0	0.0026	0.0038	0.581	0.6466	0.0656	.
1700011C11Rik	ENSMUSG00000108800.3	lncRNA	chr7_71600000	0.0025	0	-0.0036	0.4455	0.3919	-0.0536	.
1700011D18Rik	ENSMUSG00000108791.2	lncRNA	chr7_78450000	0	0.1719	0.2288	0.7087	0.6691	-0.0396	.
1700011L03Rik	ENSMUSG00000109759.3	lncRNA	chr8_47350000	0	0	0	0.7706	0.8475	0.0768	.
1700011L22Rik	ENSMUSG00000031682.6	protein_coding	chr8_79900000	0	0.0006	0.0009	0.7747	0.7421	-0.0326	.
1700012A03Rik	ENSMUSG00000029766.8	protein_coding	chr6_32000000	0	0	0	0.8273	0.4798	-0.3476	.
1700012B07Rik	ENSMUSG00000020617.14	protein_coding	chr11_109700000	0.0041	0	-0.0059	0.5112	0.5773	0.0661	.
1700012B09Rik	ENSMUSG00000031927.10	protein_coding	chr9_14650000	0	0	0	0.7737	0.7675	-0.0062	.
1700012C08Rik	ENSMUSG00000086482.2	lncRNA	chr4_117050000	0	0	0	0.912	0.917	0.005	.
1700012C14Rik	ENSMUSG00000085470.4	lncRNA	chr6_30450000	0.0848	0.151	0.0854	0.8808	0.9833	0.1026	.
1700012D16Rik	ENSMUSG00000105023.3	lncRNA	chr3_152900000	0.021	0	-0.0299	0.6876	0.4207	-0.2669	.
1700012E03Rik	ENSMUSG00000101275.3	lncRNA	chr1_120350000	0	0	0	0.7087	0.4106	-0.2981	.
1700012H19Rik	ENSMUSG00000123418.1	lncRNA	chr11_112700000	0	0.0276	0.0393	0.6555	0.7408	0.0853	.
1700012I11Rik	ENSMUSG00000102069.3	lncRNA	chr15_67150000	0.0011	0	-0.0015	0.4856	0.278	-0.2076	.
1700012J15Rik	ENSMUSG00000107394.3	lncRNA	chr6_7750000	0.0806	0.001	-0.1105	0.5256	0.2645	-0.2612	.
1700013D24Rik	ENSMUSG00000079346.6	lncRNA	chr6_124300000	0	0	0	0.4839	0.3966	-0.0873	.
1700013G24Rik	ENSMUSG00000041399.4	protein_coding	chr4_137150000	0.0856	0	-0.1185	0.9932	0.9517	-0.0415	.
1700013H16Rik	ENSMUSG00000054727.3	protein_coding	chrX_52700000	17.6287	0	-4.2195	0.6403	0.4113	-0.229	.
1700013M08Rik	ENSMUSG00000106586.3	lncRNA	chr5_102600000	0	0	0	0.503	0.4532	-0.0498	.
1700013N06Rik	ENSMUSG00000085801.3	lncRNA	chr12_106800000	0	0	0	0.8089	0.1937	-0.6152	Bottom
1700014B07Rik	ENSMUSG00000118578.2	protein_coding	chr2_6300000	0.2279	0.2092	-0.0222	0.6558	0.7377	0.0819	.
1700014F14Rik	ENSMUSG00000105903.3	lncRNA	chr5_61150000	0	0	0	0.1528	0.0274	-0.1255	.
1700014L14Rik	ENSMUSG00000110056.3	lncRNA	chr8_18350000	0	0	0	0.6187	0.2585	-0.3603	.
1700015C15Rik	ENSMUSG00000113696.3	lncRNA	chr13_64550000	0.0652	0.0093	-0.0777	0.6139	0.676	0.0621	.
1700015C17Rik	ENSMUSG00000104908.3	lncRNA	chr3_153150000	0.2283	0.0073	-0.2861	0.6676	0.5258	-0.1418	.
1700015H07Rik	ENSMUSG00000115761.3	lncRNA	chr15_53450000	0	0	0	0.513	0.3119	-0.2011	.
1700015I17Rik	ENSMUSG00000110335.3	lncRNA	chr8_36150000	0	0	0	0.638	0.8104	0.1724	.
1700015O11Rik	ENSMUSG00000097671.4	lncRNA	chr6_113600000	0	0.0267	0.038	0.9431	0.9586	0.0156	.
1700016A09Rik	ENSMUSG00000123653.1	lncRNA	chr8_121250000	0	0	0	0.9777	0.9553	-0.0224	.
1700016B01Rik	ENSMUSG00000104538.3	lncRNA	chr5_112300000	0	0	0	0.9461	0.8438	-0.1023	.
1700016F12Rik	ENSMUSG00000104955.3	lncRNA	chr5_97000000	0	0	0	0.493	0.5801	0.087	.
1700016G22Rik	ENSMUSG00000100625.9	lncRNA	chr13_5900000	0.1205	0.2492	0.1568	0.5535	0.5368	-0.0168	.
1700016H03Rik	ENSMUSG00000114673.3	lncRNA	chr19_45350000	0	0	0	0.796	0.9378	0.1418	.
1700016H13Rik	ENSMUSG00000029320.12	protein_coding	chr5_103800000	0.0418	0	-0.0591	0.715	0.8803	0.1652	.
1700016J18Rik	ENSMUSG00000111103.4	lncRNA	chr10_41900000	0.031	0.1135	0.111	0.973	0.8977	-0.0753	.
1700016K05Rik	ENSMUSG00000114563.3	lncRNA	chr17_67000000	0	0	0	0.7476	0.5971	-0.1505	.
1700016L21Rik	ENSMUSG00000101483.4	lncRNA	chr1_80450000	0	0.0041	0.006	0.4065	0.6434	0.2369	.
1700016P03Rik	ENSMUSG00000085609.4	lncRNA	chr11_75050000	0.0487	0.4923	0.5089	0.9741	0.9446	-0.0295	.
1700016P04Rik	ENSMUSG00000101894.3	lncRNA	chr6_13450000	0	0	0	0.3053	0.1746	-0.1307	.
1700017B05Rik	ENSMUSG00000032300.8	protein_coding	chr9_57150000	40.7562	11.8911	-1.6956	0.9902	0.9176	-0.0726	.
1700017G19Rik	ENSMUSG00000037884.8	lncRNA	chr3_40500000	0	0	0	0.6959	0.531	-0.165	.
1700017I07Rik	ENSMUSG00000098727.3	lncRNA	chr9_89650000	0	0	0	0.5669	0.4653	-0.1016	.
1700017J07Rik	ENSMUSG00000086348.4	lncRNA	chr2_168800000	0.5207	0	-0.6048	0.8737	0.6461	-0.2276	.
1700017L05Rik	ENSMUSG00000107232.3	lncRNA	chr5_77600000	0.0042	0	-0.0061	0.5145	0.4323	-0.0822	.
1700017M07Rik	ENSMUSG00000105651.3	lncRNA	chr3_35300000	0.007	0.0165	0.0135	0.663	0.7364	0.0734	.
1700017N19Rik	ENSMUSG00000056912.13	protein_coding	chr10_100450000	0	0	0	0.2073	0.3094	0.1021	.
1700018A04Rik	ENSMUSG00000038408.17	lncRNA	chr13_31700000	0.002	0	-0.0029	0.7592	0.4746	-0.2846	.
1700018A23Rik	ENSMUSG00000107368.3	lncRNA	chr6_126750000	0.04	0.0062	-0.0477	0.7742	0.3743	-0.3999	.
1700018B08Rik	ENSMUSG00000031809.11	protein_coding	chr8_122250000	0.0659	0	-0.0921	0.9903	0.8256	-0.1647	.
1700018B24Rik	ENSMUSG00000037910.4	lncRNA	chr3_48550000	0.0923	0	-0.1273	0.1977	0.0721	-0.1256	.
1700018F24Rik	ENSMUSG00000029620.5	protein_coding	chr5_144950000	0.1237	0	-0.1683	0.6707	0.5772	-0.0934	.
1700018L02Rik	ENSMUSG00000100075.3	lncRNA	chr19_29000000	0.201	1.3548	0.9714	0.9103	0.9347	0.0244	.
1700018P08Rik	ENSMUSG00000110709.3	lncRNA	chr8_117050000	0	0	0	0.6703	0.474	-0.1963	.
1700018P22Rik	ENSMUSG00000120273.2	lncRNA	chr9_8150000	0.0277	0.0012	-0.0376	0.3157	0.1799	-0.1358	.
1700019A02Rik	ENSMUSG00000060715.10	protein_coding	chr1_53150000	0.3509	0.0106	-0.4187	0.5588	0.306	-0.2528	.
1700019C18Rik	ENSMUSG00000113770.3	lncRNA	chr13_35550000	0.0006	0.0003	-0.0004	0.509	0.5954	0.0865	.
1700019D03Rik	ENSMUSG00000043629.13	protein_coding	chr1_53000000	0.6723	0.1026	-0.6009	0.6051	0.3401	-0.265	.
1700019F05Rik	ENSMUSG00000107027.3	lncRNA	chr5_74050000	0	0	0	0.7147	0.9011	0.1864	.
1700019G24Rik	ENSMUSG00000085416.3	lncRNA	chr6_5900000	0	0	0	0.5821	0.4202	-0.1619	.
1700019J19Rik	ENSMUSG00000111489.3	lncRNA	chr9_14000000	0.029	0	-0.0413	0.7706	0.7514	-0.0192	.
1700019L13Rik	ENSMUSG00000111639.3	lncRNA	chr9_119800000	0.1464	0	-0.1971	0.9756	0.8037	-0.1719	.
1700019P21Rik	ENSMUSG00000099808.4	lncRNA	chr1_138800000	0	0	0	0.4451	0.4522	0.0071	.
1700020A23Rik	ENSMUSG00000027409.6	protein_coding	chr2_130200000	0	0.2018	0.2652	0.9466	0.9456	-0.001	.
1700020D12Rik	ENSMUSG00000113628.3	lncRNA	chr12_26650000	0	0	0	0.7494	0.6287	-0.1207	.
1700020G17Rik	ENSMUSG00000101801.8	lncRNA	chr10_110650000	0.0016	0	-0.0022	0.5825	0.3972	-0.1853	.
1700020L13Rik	ENSMUSG00000121875.2	lncRNA	chr7_29950000	0.0841	0.1262	0.055	0.987	0.9009	-0.0861	.
1700020L24Rik	ENSMUSG00000035085.6	protein_coding	chr11_83300000	0.0468	0.1443	0.1285	0.9518	0.8657	-0.0861	.
1700020M21Rik	ENSMUSG00000100146.2	lncRNA	chr9_120700000	0.3379	0	-0.4199	0.8865	0.6969	-0.1896	.
1700020N01Rik	ENSMUSG00000050844.7	protein_coding	chr10_21450000	0.037	0	-0.0524	0.7959	0.7182	-0.0777	.
1700020N15Rik	ENSMUSG00000059690.2	protein_coding	chrX_68950000	2.237	0	-1.6947	0.3091	0.2091	-0.1	.
1700020N18Rik	ENSMUSG00000100253.3	lncRNA	chr1_91300000	0	0	0	0.9612	0.9582	-0.003	.
1700021A07Rik	ENSMUSG00000037535.7	lncRNA	chr10_21250000	0.0662	0	-0.0925	0.9059	0.8	-0.1059	.
1700021F02Rik	ENSMUSG00000105426.3	lncRNA	chr5_103450000	0	0	0	0.6712	0.7749	0.1037	.
1700021G15Rik	ENSMUSG00000112387.3	lncRNA	chr10_126050000	0	0	0	0.4046	0.1723	-0.2323	.
1700021J08Rik	ENSMUSG00000086890.3	lncRNA	chr4_116850000	0	0.0628	0.0879	0.8437	0.8998	0.0562	.
1700021N21Rik	ENSMUSG00000087343.3	lncRNA	chr4_134150000	0	0.0032	0.0046	0.9939	0.912	-0.0819	.
1700021P04Rik	ENSMUSG00000096796.3	lncRNA	chr19_24000000	0	0	0	0.6855	0.8693	0.1837	.
1700022A21Rik	ENSMUSG00000121722.2	lncRNA	chr5_24850000	0	0	0	0.8434	0.9818	0.1384	.
1700022A22Rik	ENSMUSG00000099751.8	lncRNA	chr15_46150000	0	0	0	0.1834	0.0168	-0.1666	.
1700022E09Rik	ENSMUSG00000099983.3	lncRNA	chr16_59250000	0	0	0	0.4883	0.3276	-0.1607	.
1700022H01Rik	ENSMUSG00000112581.3	lncRNA	chr10_61500000	0.0509	0.0712	0.0276	0.8961	0.8625	-0.0336	.
1700022H16Rik	ENSMUSG00000099360.3	lncRNA	chr12_9600000	0.0311	0	-0.0441	0.7297	0.4845	-0.2451	.
1700022N22Rik	ENSMUSG00000097523.5	lncRNA	chr17_26200000	0.1515	0.2231	0.0871	0.9669	0.9891	0.0222	.
1700023C21Rik	ENSMUSG00000087393.3	lncRNA	chr11_109700000	0	0	0	0.5112	0.5773	0.0661	.
1700023F02Rik	ENSMUSG00000100000.9	lncRNA	chr10_66300000	0	0	0	0.4632	0.1928	-0.2705	.
1700023G09Rik	ENSMUSG00000103503.3	lncRNA	chr1_186650000	0	0	0	0.5612	0.4081	-0.1531	.
1700023H06Rik	ENSMUSG00000089827.3	lncRNA	chr13_81000000	1.9673	0.2169	-1.286	0.4951	0.3463	-0.1488	.
1700024B18Rik	ENSMUSG00000099994.3	lncRNA	chr14_124200000	0.0132	0	-0.0189	0.1591	0.0787	-0.0803	.
1700024G13Rik	ENSMUSG00000072473.5	protein_coding	chr14_32100000	0	0	0	0.9474	0.6897	-0.2578	.
1700024I08Rik	ENSMUSG00000113825.3	lncRNA	chr13_63850000	0	0	0	0.7598	0.8568	0.097	.
1700024J04Rik	ENSMUSG00000133898.1	lncRNA	chr11_49500000	0.0079	0	-0.0113	0.8223	0.6333	-0.1889	.
1700024N05Rik	ENSMUSG00000136977.1	lncRNA	chr6_43100000	0	0	0	0.2095	0.0431	-0.1665	.
1700024P12Rik	ENSMUSG00000120854.2	lncRNA	chr17_3100000	7.2682	1.1191	-1.9642	0.5773	0.489	-0.0884	.
1700025C18Rik	ENSMUSG00000078935.2	protein_coding	chr2_164900000	0.0138	0	-0.0198	0.9646	0.94	-0.0245	.
1700025D23Rik	ENSMUSG00000086760.3	lncRNA	chr11_113950000	0.047	0	-0.0663	0.7192	0.5528	-0.1664	.
1700025F24Rik	ENSMUSG00000100558.3	lncRNA	chr10_119250000	0.0144	0.0009	-0.0194	0.7881	0.4462	-0.3419	.
1700025G04Rik	ENSMUSG00000032666.17	protein_coding	chr1_151950000	0.5065	2.9197	1.3795	0.7158	0.8803	0.1645	.
1700025H01Rik	ENSMUSG00000101888.3	lncRNA	chr16_30000000	0.0174	0.0249	0.0106	0.8609	0.9229	0.062	.
1700025J12Rik	ENSMUSG00000108409.3	lncRNA	chr7_121200000	0	0.0452	0.0637	0.7003	0.5626	-0.1377	.
1700025K04Rik	ENSMUSG00000112482.3	lncRNA	chr10_126150000	0	0	0	0.5732	0.3137	-0.2595	.
1700025K24Rik	ENSMUSG00000099747.3	lncRNA	chr17_54650000	0	0	0	0.2456	0.0917	-0.1539	.
1700025L06Rik	ENSMUSG00000109962.3	lncRNA	chr7_45950000	0	0	0	0.9066	0.7193	-0.1874	.
1700025M24Rik	ENSMUSG00000100175.8	lncRNA	chr5_73400000	0.0069	0.0795	0.1004	0.658	0.8769	0.2189	.
1700025N21Rik	ENSMUSG00000090200.3	lncRNA	chr10_82950000	0	0	0	0.9417	0.9304	-0.0113	.
1700025N23Rik	ENSMUSG00000100121.3	lncRNA	chr6_39000000	0.0445	0.011	-0.0471	0.835	0.897	0.062	.
1700025O08Rik	ENSMUSG00000028244.8	lncRNA	chr4_22900000	0	0	0	0.2978	0.3354	0.0376	.
1700026D11Rik	ENSMUSG00000086379.9	lncRNA	chr2_132350000	0	0	0	0.5545	0.7609	0.2064	.
1700026F02Rik	ENSMUSG00000101854.4	lncRNA	chr8_71400000	0.0012	0	-0.0017	0.8641	0.4538	-0.4104	.
1700026J12Rik	ENSMUSG00000073976.13	lncRNA	chr16_49000000	0	0.0003	0.0005	0.3496	0.3816	0.032	.
1700026J14Rik	ENSMUSG00000097716.3	lncRNA	chr6_48500000	0.1663	0.2898	0.1452	0.9553	0.9085	-0.0468	.
1700026N04Rik	ENSMUSG00000114681.4	lncRNA	chr13_47250000	0.0215	0.006	-0.0221	0.7978	0.9466	0.1488	.
1700027A07Rik	ENSMUSG00000084864.3	lncRNA	chr15_78800000	0	0.0229	0.0327	0.9995	0.9751	-0.0244	.
1700027F06Rik	ENSMUSG00000107737.3	lncRNA	chr6_124300000	0	0	0	0.4839	0.3966	-0.0873	.
1700027F09Rik	ENSMUSG00000100911.4	lncRNA	chr5_64600000	0	0	0	0.7726	0.9053	0.1327	.
1700027H10Rik	ENSMUSG00000100799.4	lncRNA	chr3_45350000	0.0052	0.0035	-0.0025	0.2873	0.4738	0.1864	.
1700027I24Rik	ENSMUSG00000098304.4	lncRNA	chr9_36550000	0.0077	0.0017	-0.0086	0.4338	0.3541	-0.0797	.
1700027J07Rik	ENSMUSG00000111422.3	lncRNA	chr10_43650000	0.0021	0	-0.003	0.7358	0.5814	-0.1544	.
1700028D13Rik	ENSMUSG00000101683.8	lncRNA	chr5_112350000	0	0	0	0.9833	0.889	-0.0942	.
1700028E10Rik	ENSMUSG00000097321.8	lncRNA	chr5_151250000	0.0209	0.0928	0.0982	0.3971	0.5518	0.1547	.
1700028E11Rik	ENSMUSG00000121820.2	lncRNA	chr13_61850000	1.0453	0.0361	-0.9811	0.7592	0.0269	-0.7323	Bottom
1700028I16Rik	ENSMUSG00000056821.16	lncRNA	chr10_82600000	0.3913	0.0255	-0.4401	0.8722	0.783	-0.0892	.
1700028J19Rik	ENSMUSG00000038782.8	protein_coding	chr7_43850000	0.0627	0.2151	0.1933	0.9687	0.5659	-0.4028	.
1700028K03Rik	ENSMUSG00000089798.11	protein_coding	chr5_107650000	0	0	0	0.756	0.5362	-0.2198	.
1700028M03Rik	ENSMUSG00000101334.3	lncRNA	chr3_83400000	0	0.0023	0.0034	0.5582	0.3371	-0.2211	.
1700028N14Rik	ENSMUSG00000078635.5	lncRNA	chr11_103150000	0.2305	0.0427	-0.2388	0.9042	0.9145	0.0103	.
1700028P15Rik	ENSMUSG00000086823.9	lncRNA	chr2_171750000	0.0292	0	-0.0415	0.7112	0.1343	-0.5769	Bottom
1700029B22Rik	ENSMUSG00000100759.8	lncRNA	chr7_130700000	0	0	0	0.8277	0.2936	-0.5341	Bottom
1700029E06Rik	ENSMUSG00000100557.3	lncRNA	chr5_58600000	0	0	0	0.1546	0.1575	0.0029	.
1700029F12Rik	ENSMUSG00000052075.8	protein_coding	chr13_97150000	0.1114	0	-0.1523	0.8984	0.5813	-0.3171	.
1700029H14Rik	ENSMUSG00000031452.16	protein_coding	chr8_13600000	0	0.0251	0.0358	0.9773	0.9383	-0.0391	.
1700029J03Rik	ENSMUSG00000099968.9	lncRNA	chr16_93300000	0.0043	0	-0.0061	0.8298	0.7687	-0.061	.
1700029K24Rik	ENSMUSG00000120880.2	lncRNA	chr11_70500000	2.8931	6.1272	0.8724	0.9534	0.9763	0.0229	.
1700029M03Rik	ENSMUSG00000101189.3	lncRNA	chr1_164750000	0	0	0	0.5061	0.691	0.1849	.
1700029M20Rik	ENSMUSG00000086788.4	lncRNA	chr4_135300000	0.2055	0	-0.2696	0.9699	0.826	-0.1439	.
1700029N11Rik	ENSMUSG00000098144.10	lncRNA	chr13_44550000	0	0	0	0.8357	0.8669	0.0311	.
1700030A11Rik	ENSMUSG00000085333.3	lncRNA	chr17_29100000	0.1206	0	-0.1643	0.999	0.9884	-0.0106	.
1700030C10Rik	ENSMUSG00000099759.3	lncRNA	chr12_20850000	6.0573	0	-2.8191	0.85	0.292	-0.558	Bottom
1700030C12Rik	ENSMUSG00000086459.5	lncRNA	chr11_23400000	0.0514	0.3439	0.354	0.7167	0.6975	-0.0193	.
1700030C14Rik	ENSMUSG00000087148.4	lncRNA	chr2_152450000	0	0.002	0.0029	0.8504	0.7866	-0.0639	.
1700030E10Rik	ENSMUSG00000112619.3	lncRNA	chr10_67450000	0.0038	0	-0.0054	0.7026	0.6369	-0.0657	.
1700030F04Rik	ENSMUSG00000099869.8	lncRNA	chr6_117500000	0.0009	0	-0.0013	0.7987	0.3758	-0.4228	.
1700030J22Rik	ENSMUSG00000031847.9	protein_coding	chr8_117700000	2.188	0.8054	-0.8203	0.8224	0.5737	-0.2487	.
1700030K09Rik	ENSMUSG00000052794.14	protein_coding	chr8_73150000	3.1007	6.3275	0.8374	0.8555	0.9264	0.0709	.
1700030L20Rik	ENSMUSG00000099508.3	lncRNA	chr3_136100000	0.0056	0	-0.008	0.152	0.4641	0.3121	Top
1700030L22Rik	ENSMUSG00000113179.3	lncRNA	chr12_53350000	0	0.0126	0.018	0.7122	0.9818	0.2696	Top
1700030M09Rik	ENSMUSG00000097424.4	lncRNA	chr8_122250000	0.1257	0	-0.1708	0.9903	0.8256	-0.1647	.
1700030N03Rik	ENSMUSG00000100969.9	lncRNA	chr19_3100000	0	0.0019	0.0028	0.9604	0.1484	-0.8121	Bottom
1700030O20Rik	ENSMUSG00000100198.3	lncRNA	chr10_116550000	0	0	0	0.7154	0.3627	-0.3527	.
1700031A10Rik	ENSMUSG00000092239.3	lncRNA	chr17_37200000	0	0	0	0.6971	0.5748	-0.1223	.
1700031C06Rik	ENSMUSG00000120820.2	lncRNA	chr14_70500000	0	0.2975	0.3758	0.7537	0.9085	0.1547	.
1700031F05Rik	ENSMUSG00000032894.14	protein_coding	chrX_101900000	0	0	0	0.7684	0.453	-0.3154	.
1700031F10Rik	ENSMUSG00000047046.10	lncRNA	chr6_88200000	0.0517	0	-0.0728	0.9685	0.9428	-0.0257	.
1700031L13Rik	ENSMUSG00000099863.2	protein_coding	chr5_82250000	0	0	0	0.1321	0.2859	0.1538	.
1700031P21Rik	ENSMUSG00000100315.8	lncRNA	chr12_52600000	0.0611	0	-0.0856	0.5469	0.8344	0.2875	Top
1700034B16Rik	ENSMUSG00000097302.3	lncRNA	chr18_75900000	0	0	0	0.908	0.9257	0.0178	.
1700034E13Rik	ENSMUSG00000024532.14	protein_coding	chr18_52750000	0	0	0	0.537	0.6173	0.0804	.
1700034G24Rik	ENSMUSG00000097962.9	lncRNA	chr5_112700000	0	0	0	0.9556	0.7711	-0.1844	.
1700034H15Rik	ENSMUSG00000055833.16	lncRNA	chr1_191600000	0.3425	0.1309	-0.2475	0.8964	0.6931	-0.2033	.
1700034J05Rik	ENSMUSG00000040163.15	protein_coding	chr6_146850000	0	0	0	0.6588	0.5939	-0.0649	.
1700034K08Rik	ENSMUSG00000100294.8	lncRNA	chr9_92850000	0	0	0	0.356	0.191	-0.165	.
1700034P13Rik	ENSMUSG00000097893.11	lncRNA	chr1_9800000	0.0572	0.079	0.0295	0.4919	0.6768	0.1849	.
1700036A12Rik	ENSMUSG00000095956.4	lncRNA	chr9_60650000	0	0.0009	0.0012	0.9018	0.9532	0.0514	.
1700036G14Rik	ENSMUSG00000099995.3	lncRNA	chr3_85200000	0	0	0	0.8458	0.7595	-0.0863	.
1700036O09Rik	ENSMUSG00000086185.3	lncRNA	chrX_66500000	0	0	0	0.2682	0.1347	-0.1335	.
1700037C18Rik	ENSMUSG00000005983.16	protein_coding	chr16_3700000	0.0813	1.2075	1.0296	0.9376	0.7665	-0.1711	.
1700037F03Rik	ENSMUSG00000114125.3	lncRNA	chr13_75800000	0.0318	0.0039	-0.0396	0.3687	0.193	-0.1758	.
1700039E22Rik	ENSMUSG00000092369.3	lncRNA	chr19_44800000	0.0223	0	-0.0319	0.9704	0.766	-0.2044	.
1700039M10Rik	ENSMUSG00000097933.4	lncRNA	chr14_57800000	0.0713	0.0176	-0.0741	0.7572	0.8591	0.1018	.
1700039M15Rik	ENSMUSG00000104086.3	lncRNA	chr9_107100000	0	0	0	0.8674	0.7993	-0.0681	.
1700039O17Rik	ENSMUSG00000121269.2	lncRNA	chr2_173100000	0.1888	0	-0.2495	0.9397	0.6683	-0.2714	.
1700040D17Rik	ENSMUSG00000097515.4	lncRNA	chr3_94300000	0	0.191	0.2522	0.6633	0.8456	0.1823	.
1700040F17Rik	ENSMUSG00000101568.3	lncRNA	chr15_55250000	0	0	0	0.5111	0.42	-0.0911	.
1700040K01Rik	ENSMUSG00000139614.1	lncRNA	chr1_152800000	0	0	0	0.8161	0.872	0.0559	.
1700040L08Rik	ENSMUSG00000107406.2	lncRNA	chr6_71500000	0	0.6969	0.7629	0.698	0.6967	-0.0013	.
1700041A01Rik	ENSMUSG00000126970.1	lncRNA	chr5_88400000	0	0	0	0.2202	0.0324	-0.1878	.
1700041B01Rik	ENSMUSG00000116260.3	lncRNA	chr15_78550000	0.0312	0	-0.0444	0.9979	0.9835	-0.0144	.
1700041C23Rik	ENSMUSG00000100282.3	lncRNA	chr9_57050000	0	0.0022	0.0031	0.9535	0.9362	-0.0173	.
1700041G16Rik	ENSMUSG00000054822.7	lncRNA	chr8_23250000	0.1244	3.6309	2.0422	0.8408	0.8811	0.0404	.
1700041I07Rik	ENSMUSG00000104845.3	lncRNA	chr5_146750000	0.0163	0	-0.0234	0.7036	0.6705	-0.0331	.
1700041M05Rik	ENSMUSG00000087010.3	lncRNA	chr4_125100000	0.022	0	-0.0314	0.9365	0.5315	-0.405	.
1700041M19Rik	ENSMUSG00000100857.4	lncRNA	chr16_76750000	0	0.0002	0.0002	0.2103	0.4324	0.2221	.
1700042D02Rik	ENSMUSG00000105991.3	lncRNA	chr9_48950000	0.0385	0.0033	-0.0497	0.8166	0.9034	0.0868	.
1700042G15Rik	ENSMUSG00000087044.3	lncRNA	chr4_57350000	0.2519	0	-0.3241	0.8962	0.7411	-0.1551	.
1700042O05Rik	ENSMUSG00000112878.3	lncRNA	chr10_51550000	0	0	0	0.2408	0.035	-0.2057	.
1700042O10Rik	ENSMUSG00000086391.3	lncRNA	chr11_11800000	0.201	0	-0.2643	0.6571	0.5206	-0.1365	.
1700044K03Rik	ENSMUSG00000100297.3	lncRNA	chr18_49650000	0	0	0	0.3168	0.5842	0.2674	Top
1700045H11Rik	ENSMUSG00000078492.5	lncRNA	chr4_150900000	0.1496	0	-0.2012	0.9521	0.9369	-0.0151	.
1700046C09Rik	ENSMUSG00000085561.3	lncRNA	chr11_14400000	0	0	0	0.3108	0.0619	-0.2488	.
1700047A11Rik	ENSMUSG00000085437.10	lncRNA	chr8_26550000	0	0	0	0.6738	0.8124	0.1386	.
1700047E10Rik	ENSMUSG00000115294.2	lncRNA	chr14_44400000	0.0231	0	-0.0329	0.4444	0.0427	-0.4018	.
1700047F07Rik	ENSMUSG00000085549.8	protein_coding	chr4_107550000	0	0	0	0.8667	0.9143	0.0476	.
1700047G03Rik	ENSMUSG00000099349.9	lncRNA	chr15_11950000	0.0321	0	-0.0456	0.6901	0.7662	0.0761	.
1700047G07Rik	ENSMUSG00000110717.3	lncRNA	chr8_97200000	0.0515	0	-0.0724	0.2694	0.0806	-0.1888	.
1700047K16Rik	ENSMUSG00000087347.3	lncRNA	chr11_58200000	0.015	0.0351	0.0283	0.9108	0.7108	-0.2	.
1700047L14Rik	ENSMUSG00000101762.3	lncRNA	chr5_108900000	0	0	0	0.3844	0.2991	-0.0853	.
1700047M11Rik	ENSMUSG00000100147.5	lncRNA	chr1_182100000	0.1478	0	-0.1989	0.7956	0.7608	-0.0348	.
1700048F04Rik	ENSMUSG00000105274.3	lncRNA	chr5_126000000	0	0	0	0.7379	0.1354	-0.6024	Bottom
1700048M11Rik	ENSMUSG00000085637.4	lncRNA	chr16_92100000	0	0	0	0.8782	0.9234	0.0453	.
1700048O14Rik	ENSMUSG00000118016.3	lncRNA	chr19_26000000	0	0	0	0.6589	0.3904	-0.2685	.
1700048O20Rik	ENSMUSG00000043773.7	lncRNA	chr9_121750000	0.0509	0.0252	-0.0358	0.9182	0.8258	-0.0924	.
1700048P04Rik	ENSMUSG00000112333.3	lncRNA	chr10_68700000	0	0	0	0.6826	0.5029	-0.1797	.
1700049E15Rik	ENSMUSG00000085077.3	lncRNA	chr6_147600000	0	0	0	0.537	0.2213	-0.3157	.
1700049E17Rik2	ENSMUSG00000090440.3	protein_coding	chr14_41300000	0	0	0	0.3579	0.1096	-0.2483	.
1700049E22Rik	ENSMUSG00000101553.4	lncRNA	chr6_100500000	0.0783	0	-0.1088	0.8384	0.8602	0.0218	.
1700051A21Rik	ENSMUSG00000086951.3	lncRNA	chr11_72150000	0.145	0	-0.1953	0.8984	0.7638	-0.1345	.
1700052H01Rik	ENSMUSG00000105297.3	lncRNA	chr3_41350000	0.0031	0	-0.0044	0.7001	0.646	-0.0541	.
1700052I22Rik	ENSMUSG00000101912.3	lncRNA	chr12_80950000	0	0	0	0.7884	0.876	0.0876	.
1700052K11Rik	ENSMUSG00000099681.3	lncRNA	chr11_105050000	5.3866	14.4969	1.2789	0.7031	0.7645	0.0614	.
1700054A03Rik	ENSMUSG00000099988.9	lncRNA	chr19_53000000	0	0.0008	0.0012	0.6614	0.7933	0.132	.
1700054K02Rik	ENSMUSG00000097001.2	lncRNA	chr1_92500000	0	0	0	0.7557	0.7356	-0.0201	.
1700054K19Rik	ENSMUSG00000100219.3	lncRNA	chr6_112200000	0.0031	0	-0.0044	0.578	0.6317	0.0537	.
1700054M17Rik	ENSMUSG00000085889.3	lncRNA	chr2_118100000	0.0391	0	-0.0553	0.6909	0.6549	-0.036	.
1700054O05Rik	ENSMUSG00000111753.3	lncRNA	chr10_35350000	0	0	0	0.2815	0.1014	-0.18	.
1700055C04Rik	ENSMUSG00000093616.3	lncRNA	chr9_63900000	0.2499	0	-0.3218	0.9915	0.9795	-0.0121	.
1700055D18Rik	ENSMUSG00000070997.6	lncRNA	chr4_45000000	0.6251	1.12	0.3835	0.8526	0.9134	0.0608	.
1700056E22Rik	ENSMUSG00000044854.8	protein_coding	chr1_183750000	1.11	3.7813	1.1801	0.6767	0.6795	0.0028	.
1700056N10Rik	ENSMUSG00000084792.3	lncRNA	chr16_16850000	5.2232	2.0237	-1.0414	0.8862	0.8875	0.0013	.
1700057H15Rik	ENSMUSG00000084757.10	lncRNA	chr4_124300000	0.0044	0.0014	-0.0043	0.8795	0.6929	-0.1866	.
1700057H21Rik	ENSMUSG00000086007.3	lncRNA	chr2_51400000	0.2806	0	-0.3568	0.6342	0.5186	-0.1156	.
1700058P15Rik	ENSMUSG00000089636.3	lncRNA	chr7_18950000	0	0.0839	0.1162	0.9371	0.9817	0.0446	.
1700060C16Rik	ENSMUSG00000086887.3	lncRNA	chr6_143500000	0.0064	0.0004	-0.0087	0.5472	0.4791	-0.068	.
1700060C20Rik	ENSMUSG00000078957.5	lncRNA	chr2_158000000	0	0.0062	0.0089	0.8721	0.927	0.0549	.
1700060J05Rik	ENSMUSG00000084970.3	lncRNA	chr4_53550000	0	0	0	0.6674	0.7163	0.0489	.
1700060O08Rik	ENSMUSG00000099407.3	lncRNA	chr12_54050000	0.0065	0.0022	-0.0062	0.7177	0.9257	0.208	.
1700061E17Rik	ENSMUSG00000102060.3	lncRNA	chr9_110800000	0.0484	0	-0.0681	0.8415	0.7203	-0.1213	.
1700061E18Rik	ENSMUSG00000085759.3	lncRNA	chr13_41950000	0	0.008	0.0115	0.7574	0.6779	-0.0794	.
1700061F12Rik	ENSMUSG00000085580.3	lncRNA	chr2_9200000	0	0	0	0.3718	0.0417	-0.3301	.
1700061H18Rik	ENSMUSG00000084948.3	lncRNA	chr18_70100000	0	0	0	0.2231	0.4859	0.2628	Top
1700061I17Rik	ENSMUSG00000028009.9	lncRNA	chr3_116850000	0	0.0142	0.0204	0.4544	0.3525	-0.1019	.
1700061J23Rik	ENSMUSG00000086366.3	lncRNA	chr11_23100000	0.0232	0	-0.0331	0.7149	0.585	-0.1299	.
1700061N14Rik	ENSMUSG00000110464.3	lncRNA	chr8_48250000	0.0506	0.006	-0.0626	0.8772	0.8068	-0.0704	.
1700062C10Rik	ENSMUSG00000114390.3	lncRNA	chr14_6450000	0.0139	0	-0.0198	0.3857	0.4404	0.0547	.
1700063A18Rik	ENSMUSG00000100062.3	lncRNA	chr1_95900000	0	0	0	0.0854	0.0404	-0.045	.
1700063D05Rik	ENSMUSG00000100837.10	lncRNA	chr9_41100000	0.0202	0	-0.0289	0.8834	0.9479	0.0646	.
1700063H04Rik	ENSMUSG00000040657.5	lncRNA	chr6_122350000	0.0232	0	-0.0331	0.6282	0.4353	-0.1929	.
1700063H06Rik	ENSMUSG00000099266.3	lncRNA	chr9_82100000	0	0	0	0.2179	0.117	-0.1009	.
1700063J08Rik	ENSMUSG00000117080.2	lncRNA	chr17_29150000	0.3365	1.2238	0.7345	0.9913	0.9979	0.0065	.
1700064H15Rik	ENSMUSG00000082766.3	lncRNA	chr3_19650000	0.078	0.0184	-0.082	0.5437	0.4901	-0.0536	.
1700064J06Rik	ENSMUSG00000100681.2	lncRNA	chr10_118900000	0	0	0	0.8662	0.5233	-0.3429	.
1700064M15Rik	ENSMUSG00000100211.3	lncRNA	chr12_99550000	0	0.1437	0.1938	0.6554	0.7376	0.0822	.
1700064N11Rik	ENSMUSG00000120053.2	lncRNA	chr5_121800000	2.3788	1.2089	-0.6132	0.9223	0.9708	0.0485	.
1700065D16Rik	ENSMUSG00000096655.4	lncRNA	chr9_95700000	0.2358	0.5999	0.3726	0.6231	0.5705	-0.0526	.
1700065I16Rik	ENSMUSG00000121306.2	lncRNA	chr15_63650000	0	0	0	0.4896	0.5954	0.1058	.
1700065J11Rik	ENSMUSG00000107341.3	lncRNA	chr6_35300000	0	0	0	0.7892	0.7199	-0.0693	.
1700065J18Rik	ENSMUSG00000100872.4	lncRNA	chr1_192500000	0	0	0	0.698	0.558	-0.1401	.
1700065L07Rik	ENSMUSG00000107408.3	lncRNA	chr6_73400000	0	0	0	0.4382	0.1999	-0.2383	.
1700065O20Rik	ENSMUSG00000100134.3	lncRNA	chr18_49950000	0.0057	0	-0.0082	0.4594	0.5251	0.0658	.
1700066B17Rik	ENSMUSG00000101634.8	lncRNA	chr1_39900000	0.0054	0.0014	-0.0057	0.8109	0.8378	0.0269	.
1700066C05Rik	ENSMUSG00000101810.2	lncRNA	chr16_79750000	0	0	0	0.2312	0.0662	-0.1649	.
1700066J03Rik	ENSMUSG00000097717.4	lncRNA	chr13_58250000	0	0.154	0.2066	0.9114	0.7421	-0.1693	.
1700066M21Rik	ENSMUSG00000038323.4	protein_coding	chr1_57400000	3.0432	39.636	3.3292	0.6925	0.7219	0.0294	.
1700066N21Rik	ENSMUSG00000099605.3	lncRNA	chr5_88050000	0.0023	0	-0.0034	0.2797	0.1249	-0.1549	.
1700067G17Rik	ENSMUSG00000099378.3	lncRNA	chr1_88900000	0.2615	0	-0.3352	0.8889	0.9072	0.0183	.
1700067K01Rik	ENSMUSG00000046408.16	protein_coding	chr8_84700000	2.0273	0.1285	-1.4236	0.9367	0.9299	-0.0068	.
1700067P10Rik	ENSMUSG00000021545.6	protein_coding	chr17_48350000	0	0	0	0.9317	0.7217	-0.21	.
1700069B07Rik	ENSMUSG00000053081.4	lncRNA	chr7_121300000	0	0.4151	0.501	0.7384	0.5252	-0.2132	.
1700069L16Rik	ENSMUSG00000042184.13	lncRNA	chr5_113800000	0.0083	0	-0.0119	0.9858	0.6075	-0.3783	.
1700069P05Rik	ENSMUSG00000107637.3	lncRNA	chr6_118200000	0	0	0	0.8124	0.4041	-0.4084	.
1700071G01Rik	ENSMUSG00000086376.4	lncRNA	chr5_73300000	0	0	0	0.6993	0.8924	0.1931	.
1700071M16Rik	ENSMUSG00000090307.9	lncRNA	chr17_43900000	0	0.0213	0.0304	0.7693	0.6619	-0.1074	.
1700072B07Rik	ENSMUSG00000100487.3	lncRNA	chr9_58250000	0.0034	0	-0.0049	0.9891	0.9522	-0.0369	.
1700072G22Rik	ENSMUSG00000101702.3	lncRNA	chr1_51450000	0	0.0182	0.026	0.3607	0.4264	0.0657	.
1700072I22Rik	ENSMUSG00000134372.1	lncRNA	chr11_103500000	0.0076	0	-0.0109	0.8649	0.6351	-0.2298	.
1700072O05Rik	ENSMUSG00000107744.3	lncRNA	chr6_120500000	0.0034	0.0019	-0.0021	0.7565	0.8678	0.1113	.
1700080C20Rik	ENSMUSG00000117741.3	lncRNA	chr17_25950000	1.3115	0	-1.2088	0.9836	0.9716	-0.012	.
1700080G18Rik	ENSMUSG00000120456.2	lncRNA	chr6_30000000	7.0807	7.0742	-0.0012	0.8419	0.8997	0.0578	.
1700080N15Rik	ENSMUSG00000084859.9	lncRNA	chr2_4100000	0.0182	0	-0.026	0.718	0.4877	-0.2303	.
1700081B01Rik	ENSMUSG00000105673.3	lncRNA	chr5_126800000	0.0064	0	-0.0091	0.6108	0.1902	-0.4206	.
1700081H04Rik	ENSMUSG00000100573.3	lncRNA	chr5_119250000	0.0366	0	-0.0519	0.9746	0.2873	-0.6873	Bottom
1700081N11Rik	ENSMUSG00000113209.4	lncRNA	chr12_54900000	0.0241	0.0245	0.0007	0.718	0.9676	0.2496	.
1700082M22Rik	ENSMUSG00000023737.16	lncRNA	chr8_105350000	0.0299	0.0151	-0.0209	0.6258	0.5285	-0.0972	.
1700083H02Rik	ENSMUSG00000100668.3	lncRNA	chr12_71400000	0	0	0	0.7975	0.9869	0.1895	.
1700084C06Rik	ENSMUSG00000086016.3	lncRNA	chr9_21000000	0.0861	0.0913	0.0068	0.9491	0.976	0.0269	.
1700084D21Rik	ENSMUSG00000114333.3	lncRNA	chr13_113250000	0	0	0	0.5379	0.473	-0.0649	.
1700084E18Rik	ENSMUSG00000100747.7	lncRNA	chr2_30100000	0.708	1.0415	0.2573	0.9972	0.9965	-0.0007	.
1700084F23Rik	ENSMUSG00000099639.8	lncRNA	chr13_70150000	0.0076	0	-0.0109	0.7618	0.327	-0.4348	.
1700084M14Rik	ENSMUSG00000057805.5	protein_coding	chrX_90600000	0.2373	0	-0.3072	0.3167	0.1349	-0.1819	.
1700085C21Rik	ENSMUSG00000100890.2	lncRNA	chr12_82950000	0	0.0036	0.0052	0.8269	0.7385	-0.0883	.
1700085D07Rik	ENSMUSG00000115693.2	lncRNA	chr15_73100000	0	0	0	0.7019	0.908	0.2061	.
1700085D22Rik	ENSMUSG00000120183.2	lncRNA	chr8_73300000	0.6071	5.0682	1.9168	0.7384	0.7781	0.0397	.
1700086D15Rik	ENSMUSG00000020548.13	lncRNA	chr11_65050000	1.0512	0.0184	-1.0101	0.7095	0.4483	-0.2612	.
1700086L19Rik	ENSMUSG00000121877.2	lncRNA	chr12_74300000	0	0.0288	0.0409	0.5476	0.6335	0.0859	.
1700086O06Rik	ENSMUSG00000097080.11	lncRNA	chr18_38350000	0.4101	1.5755	0.8691	0.8341	0.8941	0.06	.
1700086P04Rik	ENSMUSG00000085085.5	lncRNA	chr4_128950000	0.4227	0.9776	0.4751	0.9553	0.8694	-0.0859	.
1700087I21Rik	ENSMUSG00000119948.2	lncRNA	chr14_103550000	0.0054	0.0589	0.0747	0.3138	0.4688	0.1549	.
1700087M22Rik	ENSMUSG00000115723.3	lncRNA	chr14_30450000	0	0	0	0.6171	0.8258	0.2087	.
1700088E04Rik	ENSMUSG00000033029.13	protein_coding	chr15_79000000	0.2182	6.7994	2.6786	0.9984	0.9346	-0.0638	.
1700092C10Rik	ENSMUSG00000092499.3	lncRNA	chr14_69350000	0.0047	0	-0.0068	0.6456	0.507	-0.1386	.
1700092C17Rik	ENSMUSG00000085353.4	lncRNA	chr2_22600000	0	0	0	0.5971	0.4356	-0.1615	.
1700092E19Rik	ENSMUSG00000084811.4	lncRNA	chr13_26450000	0	0	0	0.3021	0.4774	0.1754	.
1700092K14Rik	ENSMUSG00000078600.3	lncRNA	chr11_114050000	0	0	0	0.8689	0.5149	-0.354	.
1700093J21Rik	ENSMUSG00000117289.3	lncRNA	chr16_95850000	1.0752	0.3756	-0.5933	0.8247	0.8775	0.0527	.
1700093K21Rik	ENSMUSG00000020286.14	protein_coding	chr11_23450000	0.0336	0.0774	0.0598	0.8317	0.6424	-0.1893	.
1700093P08Rik	ENSMUSG00000110603.2	lncRNA	chr8_76700000	0	0	0	0.1143	0.0319	-0.0824	.
1700094J05Rik	ENSMUSG00000101695.3	lncRNA	chr10_76200000	0.0401	0	-0.0568	0.965	0.869	-0.096	.
1700094M23Rik	ENSMUSG00000105337.6	lncRNA	chr3_152850000	0	0	0	0.5963	0.4357	-0.1606	.
1700094M24Rik	ENSMUSG00000107895.3	lncRNA	chr6_52450000	0	0	0	0.8791	0.8909	0.0118	.
1700095A13Rik	ENSMUSG00000100430.4	lncRNA	chr18_83100000	0.005	0.0173	0.0175	0.7632	0.642	-0.1212	.
1700095B10Rik	ENSMUSG00000098230.9	lncRNA	chr5_112900000	0	0	0	0.9447	0.6374	-0.3072	.
1700095J03Rik	ENSMUSG00000085407.4	lncRNA	chr7_109000000	0.0795	0.7197	0.6718	0.5542	0.6935	0.1393	.
1700095J07Rik	ENSMUSG00000084861.3	lncRNA	chr6_30300000	0.0191	0.0026	-0.0235	0.872	0.9832	0.1112	.
1700095J12Rik	ENSMUSG00000084804.3	lncRNA	chr4_137850000	0.1735	0	-0.2308	0.9424	0.9693	0.027	.
1700095K22Rik	ENSMUSG00000108505.3	lncRNA	chr7_3950000	0	0	0	0.6756	0.2417	-0.4339	.
1700096J18Rik	ENSMUSG00000099630.3	lncRNA	chr11_109200000	0.0865	0.005	-0.1124	0.7079	0.8171	0.1093	.
1700096K18Rik	ENSMUSG00000101856.3	lncRNA	chr5_25700000	4.6356	26.5206	2.2879	0.7496	0.8055	0.0559	.
1700097N02Rik	ENSMUSG00000099474.3	lncRNA	chr17_30800000	14.3964	0	-3.9445	0.9663	0.7437	-0.2225	.
1700099I09Rik	ENSMUSG00000091906.4	lncRNA	chr13_102850000	0	0.0013	0.0019	0.5028	0.8118	0.309	Top
1700100I10Rik	ENSMUSG00000115372.3	lncRNA	chr14_115150000	0	0	0	0.2646	0.146	-0.1186	.
1700100L14Rik	ENSMUSG00000101051.8	lncRNA	chr13_70700000	0.0576	0	-0.0808	0.7768	0.5469	-0.2298	.
1700101I11Rik	ENSMUSG00000097675.5	lncRNA	chr6_129500000	0.0308	0.1653	0.1769	0.4141	0.4858	0.0717	.
1700101I19Rik	ENSMUSG00000045815.6	lncRNA	chr1_34600000	0	0.2325	0.3016	0.785	0.5565	-0.2285	.
1700101O22Rik	ENSMUSG00000102096.3	lncRNA	chr12_7350000	0	0	0	0.6015	0.1819	-0.4197	.
1700102H20Rik	ENSMUSG00000116852.4	lncRNA	chr17_3600000	0.7455	1.6575	0.6064	0.5493	0.5398	-0.0095	.
1700102P08Rik	ENSMUSG00000032611.10	protein_coding	chr9_108250000	0.1536	0.2141	0.0738	0.8842	0.9064	0.0222	.
1700104B16Rik	ENSMUSG00000049476.14	lncRNA	chr8_34200000	0.3253	0.2186	-0.1211	0.6697	0.64	-0.0297	.
1700104L18Rik	ENSMUSG00000112821.3	lncRNA	chr12_54250000	0.0212	0.0128	-0.0119	0.7762	0.8988	0.1226	.
1700105G05Rik	ENSMUSG00000113747.3	lncRNA	chr12_90900000	0	0	0	0.3331	0.3584	0.0253	.
1700105P06Rik	ENSMUSG00000099923.5	lncRNA	chr19_7350000	0.1541	0.1074	-0.0596	0.9449	0.9734	0.0285	.
1700106O07Rik	ENSMUSG00000117394.3	lncRNA	chr17_80100000	0	0	0	0.6622	0.7809	0.1187	.
1700108F19Rik	ENSMUSG00000101009.8	lncRNA	chr14_76800000	0.3874	0.0055	-0.4646	0.8089	0.8883	0.0794	.
1700108J01Rik	ENSMUSG00000100585.3	lncRNA	chr14_122450000	0	0	0	0.6812	0.5155	-0.1657	.
1700108N06Rik	ENSMUSG00000106034.3	lncRNA	chr5_11350000	0	0	0	0.6499	0.0359	-0.614	Bottom
1700108N11Rik	ENSMUSG00000084837.3	lncRNA	chr2_144150000	0.2708	0	-0.3458	0.6764	0.539	-0.1374	.
1700109G14Rik	ENSMUSG00000101505.3	lncRNA	chr14_61500000	0.0064	0.0184	0.0171	0.8268	0.9525	0.1257	.
1700109G15Rik	ENSMUSG00000085044.3	lncRNA	chr11_84600000	0	0	0	0.8896	0.781	-0.1086	.
1700109H08Rik	ENSMUSG00000008307.12	protein_coding	chr5_3600000	0.6025	0.2836	-0.3201	0.5985	0.7111	0.1126	.
1700109I08Rik	ENSMUSG00000101261.3	lncRNA	chr14_39350000	0	0	0	0.335	0.0572	-0.2778	.
1700109K24Rik	ENSMUSG00000097267.4	lncRNA	chr15_76950000	0	0	0	0.9498	0.9351	-0.0146	.
1700110C19Rik	ENSMUSG00000099384.9	lncRNA	chr17_10500000	0.2879	0.4792	0.1998	0.7176	0.9109	0.1933	.
1700110I01Rik	ENSMUSG00000079407.11	lncRNA	chr14_19150000	0	0	0	0.5005	0.2036	-0.2969	.
1700110I07Rik	ENSMUSG00000108490.3	lncRNA	chr7_40850000	0	0	0	0.5093	0.0748	-0.4345	.
1700110K17Rik	ENSMUSG00000087047.10	lncRNA	chr9_40200000	0.0764	0	-0.1062	0.7407	0.5768	-0.1639	.
1700111E14Rik	ENSMUSG00000029837.4	lncRNA	chr6_36900000	0.0034	0.0044	0.0013	0.6032	0.7959	0.1927	.
1700111N16Rik	ENSMUSG00000100511.3	lncRNA	chrX_69050000	0.01	0.0003	-0.014	0.3994	0.2172	-0.1823	.
1700112D23Rik	ENSMUSG00000091329.5	lncRNA	chr3_28800000	0.0046	0.0202	0.0223	0.7031	0.6841	-0.019	.
1700112H15Rik	ENSMUSG00000101574.3	lncRNA	chr1_184250000	0.0062	0.0008	-0.0078	0.473	0.6503	0.1774	.
1700112J05Rik	ENSMUSG00000086632.3	lncRNA	chr5_77150000	0	0	0	0.7079	0.6789	-0.029	.
1700112J16Rik	ENSMUSG00000097527.5	lncRNA	chr7_66850000	0.0456	0.0436	-0.0027	0.77	0.8645	0.0945	.
1700112K13Rik	ENSMUSG00000087510.3	lncRNA	chr4_127700000	0	0	0	0.8399	0.2579	-0.582	Bottom
1700112M02Rik	ENSMUSG00000113358.3	lncRNA	chr13_71700000	0	0.0003	0.0005	0.6161	0.4533	-0.1628	.
1700113A16Rik	ENSMUSG00000096935.8	lncRNA	chr3_88050000	0.4366	0.9072	0.4087	0.9611	0.9818	0.0207	.
1700113B09Rik	ENSMUSG00000112028.3	lncRNA	chr10_71000000	0	0.0018	0.0025	0.6596	0.7663	0.1067	.
1700113H08Rik	ENSMUSG00000047129.12	protein_coding	chr10_86850000	0.001	0.0008	-0.0003	0.6557	0.5326	-0.1231	.
1700116B05Rik	ENSMUSG00000092276.4	lncRNA	chr16_50600000	0	0	0	0.3792	0.3538	-0.0254	.
1700119H24Rik	ENSMUSG00000100593.3	lncRNA	chr16_34750000	0.025	0	-0.0356	0.9862	0.9773	-0.0089	.
1700119I11Rik	ENSMUSG00000082488.4	lncRNA	chr13_92000000	0	0	0	0.5761	0.5259	-0.0502	.
1700120B22Rik	ENSMUSG00000045391.6	lncRNA	chr10_63050000	0.1109	0.011	-0.1359	0.6849	0.6904	0.0056	.
1700120C14Rik	ENSMUSG00000100599.5	lncRNA	chr15_99150000	0.1023	0.0883	-0.0185	0.9443	0.9785	0.0342	.
1700120C18Rik	ENSMUSG00000098086.3	lncRNA	chr8_88200000	0	0	0	0.8548	0.4239	-0.4309	.
1700120E14Rik	ENSMUSG00000086333.3	lncRNA	chr18_74600000	0	0	0	0.7565	0.4238	-0.3327	.
1700120G07Rik	ENSMUSG00000100717.8	lncRNA	chr7_134750000	0.0065	0	-0.0094	0.6907	0.6741	-0.0167	.
1700120G11Rik	ENSMUSG00000086068.3	lncRNA	chr4_14200000	0.0063	0.0005	-0.0083	0.3878	0.1573	-0.2305	.
1700120K04Rik	ENSMUSG00000099579.3	lncRNA	chr7_127200000	0	0.5038	0.5886	0.9699	0.9343	-0.0356	.
1700121C08Rik	ENSMUSG00000086275.3	lncRNA	chr4_123700000	0	0.0073	0.0104	0.806	0.6041	-0.2019	.
1700121C10Rik	ENSMUSG00000136238.1	lncRNA	chr8_95500000	0.0187	0.0061	-0.0178	0.873	0.9409	0.0679	.
1700121L03Rik	ENSMUSG00000099574.3	lncRNA	chr1_125100000	0	0	0	0.409	0.141	-0.268	.
1700121L16Rik	ENSMUSG00000100364.3	lncRNA	chrX_103850000	0	0.0009	0.0013	0.5038	0.3066	-0.1973	.
1700121N20Rik	ENSMUSG00000092066.3	lncRNA	chr12_106400000	0.0317	0	-0.045	0.8263	0.3528	-0.4735	Bottom
1700122C19Rik	ENSMUSG00000117800.3	lncRNA	chr19_37450000	0.0104	0	-0.015	0.8806	0.8419	-0.0386	.
1700122E12Rik	ENSMUSG00000087685.3	lncRNA	chr8_85550000	0.192	0.0406	-0.196	0.9029	0.9495	0.0466	.
1700122H20Rik	ENSMUSG00000099735.3	lncRNA	chr17_7150000	0	0	0	0.9029	0.9602	0.0573	.
1700122O11Rik	ENSMUSG00000094928.2	protein_coding	chr17_48300000	0	0.0154	0.022	0.8917	0.7188	-0.1729	.
1700123J17Rik	ENSMUSG00000108676.3	lncRNA	chr7_125800000	0.0278	0	-0.0395	0.7366	0.8259	0.0893	.
1700123K08Rik	ENSMUSG00000029526.6	protein_coding	chr5_138550000	0	0.0083	0.0119	0.7493	0.4609	-0.2884	.
1700123M08Rik	ENSMUSG00000085614.4	lncRNA	chr4_12000000	0.0133	0.1985	0.2422	0.6254	0.7415	0.1161	.
1700123O12Rik	ENSMUSG00000086080.9	lncRNA	chr4_10600000	0.0016	0	-0.0024	0.5306	0.1951	-0.3356	.
1700123O20Rik	ENSMUSG00000040822.8	protein_coding	chr14_54900000	17.5936	50.1346	1.4595	0.9395	0.9265	-0.013	.
1700123O21Rik	ENSMUSG00000101481.3	lncRNA	chr16_5800000	0	0	0	0.8544	0.1797	-0.6747	Bottom
1700124L16Rik	ENSMUSG00000099354.8	lncRNA	chr6_83700000	1.0819	1.4783	0.2515	0.9495	0.8876	-0.0619	.
1700124M09Rik	ENSMUSG00000110938.3	lncRNA	chr10_18950000	0	0	0	0.7189	0.4764	-0.2425	.
1700125G02Rik	ENSMUSG00000085263.3	lncRNA	chr4_124750000	0.0472	0	-0.0665	0.9926	0.9118	-0.0808	.
1700125G22Rik	ENSMUSG00000097584.4	lncRNA	chr3_27200000	0.6992	0.1449	-0.5697	0.6845	0.7158	0.0313	.
1700125H03Rik	ENSMUSG00000085197.9	lncRNA	chr8_68800000	0.0228	0.0788	0.0769	0.5816	0.5977	0.0162	.
1700126A01Rik	ENSMUSG00000099945.3	lncRNA	chr1_57150000	0	0	0	0.6178	0.4093	-0.2085	.
1700126G02Rik	ENSMUSG00000107802.3	lncRNA	chr6_143150000	0.0093	0.0021	-0.0104	0.6696	0.6177	-0.0519	.
1700126H18Rik	ENSMUSG00000107014.2	lncRNA	chr5_66300000	0	0	0	0.8763	0.794	-0.0823	.
1700127F24Rik	ENSMUSG00000113830.3	lncRNA	chr12_112800000	0.0797	0	-0.1106	0.8218	0.8584	0.0366	.
1700128A07Rik	ENSMUSG00000099794.3	lncRNA	chr14_106700000	0	0.0003	0.0005	0.2091	0.3611	0.152	.
1700128E19Rik	ENSMUSG00000031510.7	lncRNA	chr8_11750000	0	0	0	0.9254	0.87	-0.0554	.
1700128F08Rik	ENSMUSG00000121852.2	lncRNA	chr9_8400000	0	0	0	0.4687	0.0847	-0.384	.
1700128I11Rik	ENSMUSG00000114991.3	lncRNA	chr14_48600000	0.0884	0	-0.1223	0.8418	0.6379	-0.2039	.
1700129C05Rik	ENSMUSG00000021977.12	protein_coding	chr14_59350000	0	0	0	0.6926	0.3905	-0.3021	.
1700129L04Rik	ENSMUSG00000100603.8	lncRNA	chr15_95050000	0	0.0017	0.0025	0.5727	0.4428	-0.1299	.
1810006J02Rik	ENSMUSG00000100182.9	lncRNA	chr1_98050000	0.0112	0.0083	-0.0041	0.3723	0.3343	-0.0379	.
1810007C17Rik	ENSMUSG00000100844.3	lncRNA	chr12_49500000	0	0	0	0.2662	0.1254	-0.1408	.
1810007D17Rik	ENSMUSG00000100001.3	lncRNA	chr19_58550000	0	0	0	0.7475	0.6581	-0.0894	.
1810008B01Rik	ENSMUSG00000089745.2	lncRNA	chr8_125000000	0.2421	0.1164	-0.1539	0.967	0.9686	0.0016	.
1810008I18Rik	ENSMUSG00000100094.4	lncRNA	chr7_65450000	0.0268	0	-0.0381	0.7912	0.7374	-0.0538	.
1810009A15Rik	ENSMUSG00000071653.10	protein_coding	chr19_8850000	0	0	0	0.9484	0.8748	-0.0736	.
1810009J06Rik	ENSMUSG00000094808.3	protein_coding	chr6_40900000	0	0	0	0.3691	0.1098	-0.2593	.
1810010H24Rik	ENSMUSG00000078607.7	protein_coding	chr11_106900000	0.8852	7.9469	2.2467	0.7523	0.9695	0.2171	.
1810010K12Rik	ENSMUSG00000056329.6	lncRNA	chr2_19450000	0	0.0202	0.0289	0.6615	0.4201	-0.2414	.
1810012K08Rik	ENSMUSG00000087595.3	lncRNA	chr2_26000000	0.0167	0	-0.0239	0.9995	0.9635	-0.0361	.
1810012K16Rik	ENSMUSG00000099825.3	lncRNA	chr8_22850000	0.5763	2.0565	0.9553	0.7972	0.7167	-0.0805	.
1810013D15Rik	ENSMUSG00000028177.16	lncRNA	chr3_157600000	0.2163	0.1644	-0.0629	0.4392	0.4171	-0.0221	.
1810014P07Rik	ENSMUSG00000117434.2	lncRNA	chr17_29900000	2.2745	0.0541	-1.6353	0.9929	0.9832	-0.0097	.
1810018F18Rik	ENSMUSG00000121340.2	lncRNA	chr19_58650000	0	0	0	0.7259	0.5842	-0.1418	.
1810019D21Rik	ENSMUSG00000086390.10	lncRNA	chr8_106850000	1.6358	0.011	-1.3825	0.8065	0.8807	0.0742	.
1810019N24Rik	ENSMUSG00000097115.5	lncRNA	chr7_12650000	0.1833	0.0453	-0.1789	0.7596	0.7025	-0.0571	.
1810021B22Rik	ENSMUSG00000087331.11	lncRNA	chr15_88950000	0	3.2396	2.0839	0.952	0.9019	-0.0501	.
1810024B03Rik	ENSMUSG00000044145.3	protein_coding	chr2_127000000	0.4025	0.4446	0.0427	0.6439	0.8903	0.2464	.
1810028F09Rik	ENSMUSG00000114985.2	lncRNA	chr14_51350000	0	1.2065	1.1417	0.5848	0.4541	-0.1308	.
1810030O07Rik	ENSMUSG00000044148.7	protein_coding	chrX_12500000	11.1937	15.3366	0.422	0.8636	0.9066	0.043	.
1810034E14Rik	ENSMUSG00000097101.6	lncRNA	chr13_64350000	0	0.001	0.0015	0.8236	0.6393	-0.1843	.
1810035K13Rik	ENSMUSG00000118223.3	lncRNA	chr19_58650000	0	0	0	0.7259	0.5842	-0.1418	.
1810037I17Rik	ENSMUSG00000054091.10	protein_coding	chr3_122700000	70.736	214.768	1.5887	0.4273	0.6408	0.2135	.
1810041H14Rik	ENSMUSG00000102112.4	lncRNA	chr14_122100000	0.6915	0.3684	-0.3058	0.7029	0.6827	-0.0202	.
1810044D09Rik	ENSMUSG00000100680.4	lncRNA	chr6_91400000	0.1124	0.6815	0.5961	0.8633	0.9575	0.0941	.
1810044K17Rik	ENSMUSG00000116846.4	lncRNA	chr16_93150000	0	0	0	0.7561	0.756	-0.0001	.
1810049I09Rik	ENSMUSG00000108587.3	lncRNA	chr7_64850000	0.0147	0	-0.0211	0.7632	0.6211	-0.1421	.
1810049J17Rik	ENSMUSG00000097221.2	protein_coding	chr15_12300000	0.3605	1.5426	0.9021	0.7094	0.8307	0.1213	.
1810053B23Rik	ENSMUSG00000100277.11	lncRNA	chr16_93100000	0	0.002	0.0028	0.8146	0.8219	0.0072	.
1810055G02Rik	ENSMUSG00000035372.3	protein_coding	chr19_3750000	30.973	18.8291	-0.6892	0.9903	0.9893	-0.0009	.
1810058N15Rik	ENSMUSG00000117861.3	lncRNA	chr19_5600000	0	0	0	0.9976	0.9859	-0.0117	.
1810059C17Rik	ENSMUSG00000086340.3	lncRNA	chr2_18050000	0.2251	0.5544	0.3434	0.6547	0.7121	0.0574	.
1810059H22Rik	ENSMUSG00000108207.4	lncRNA	chr5_148900000	0.0987	0.0585	-0.0538	0.8474	0.7106	-0.1368	.
1810062G17Rik	ENSMUSG00000027713.7	protein_coding	chr3_36500000	0	0.473	0.5588	0.8294	0.7794	-0.0499	.
1810062O18Rik	ENSMUSG00000084925.10	lncRNA	chr14_20550000	0.0211	0.5087	0.5631	0.6039	0.8649	0.261	Top
1810063I02Rik	ENSMUSG00000085551.3	lncRNA	chr11_59800000	0.1659	0	-0.2214	0.9562	0.8672	-0.089	.
1810064F22Rik	ENSMUSG00000090925.4	lncRNA	chr9_22100000	0.0067	0.0036	-0.0045	0.7952	0.9252	0.13	.
1810065E05Rik	ENSMUSG00000013653.3	protein_coding	chr11_58300000	0	0	0	0.8735	0.415	-0.4585	.
1810073O08Rik	ENSMUSG00000117442.3	lncRNA	chr17_84200000	0.0473	0	-0.0667	0.8566	0.8492	-0.0074	.
2010001A14Rik	ENSMUSG00000087165.10	lncRNA	chr11_57650000	0.1835	2.5875	1.5999	0.8468	0.8363	-0.0105	.
2010001K21Rik	ENSMUSG00000051606.9	lncRNA	chr13_47100000	0.0082	0.0009	-0.0104	0.8907	0.9322	0.0415	.
2010001M07Rik	ENSMUSG00000111296.3	lncRNA	chr9_60200000	0	0	0	0.9706	0.942	-0.0286	.
2010002M09Rik	ENSMUSG00000120952.2	lncRNA	chr3_104100000	0.224	3.424	1.8537	0.5899	0.6478	0.0579	.
2010003K11Rik	ENSMUSG00000042041.8	protein_coding	chr19_4500000	0	0	0	0.9911	0.9705	-0.0207	.
2010004M13Rik	ENSMUSG00000120250.2	lncRNA	chr7_15750000	2.2061	27.2314	3.1384	0.8217	0.8683	0.0466	.
2010007H06Rik	ENSMUSG00000044694.4	lncRNA	chr9_51150000	0.0476	0.1715	0.1612	0.6681	0.6752	0.0071	.
2010009K17Rik	ENSMUSG00000100860.3	lncRNA	chr2_157900000	0.0078	0	-0.0112	0.8929	0.9072	0.0144	.
2010010A06Rik	ENSMUSG00000121833.2	lncRNA	chr18_75400000	0.0175	0	-0.025	0.9217	0.8385	-0.0832	.
2010013B24Rik	ENSMUSG00000087277.3	lncRNA	chr6_145200000	0.0589	0	-0.0826	0.7725	0.6535	-0.119	.
2010016I18Rik	ENSMUSG00000091575.4	lncRNA	chr3_106350000	0.093	0	-0.1282	0.4461	0.2818	-0.1643	.
2010103J01Rik	ENSMUSG00000104368.3	lncRNA	chr1_185000000	0	0	0	0.8118	0.8538	0.0419	.
2010106C02Rik	ENSMUSG00000100738.3	lncRNA	chr17_86550000	0	0	0	0.8278	0.8508	0.0229	.
2010106E10Rik	ENSMUSG00000025528.11	protein_coding	chrX_111450000	0	0.0004	0.0005	0.2436	0.0565	-0.1871	.
2010106G04Rik	ENSMUSG00000117376.2	lncRNA	chr17_29800000	0	0.0766	0.1064	0.9947	0.9742	-0.0205	.
2010109A12Rik	ENSMUSG00000029384.6	protein_coding	chr5_93350000	0.2029	0.1285	-0.0921	0.4852	0.5717	0.0866	.
2010110E17Rik	ENSMUSG00000098434.2	lncRNA	chr8_87600000	0.7806	0.3227	-0.4288	0.8678	0.8566	-0.0111	.
2010110G14Rik	ENSMUSG00000106095.3	lncRNA	chr3_130700000	0	0	0	0.7485	0.4686	-0.2799	.
2010110K18Rik	ENSMUSG00000097755.5	lncRNA	chr18_34850000	0.8771	1.4443	0.3809	0.915	0.9385	0.0235	.
2010203P06Rik	ENSMUSG00000114604.3	lncRNA	chr13_56700000	0	0.066	0.0923	0.9808	0.8084	-0.1724	.
2010204K13Rik	ENSMUSG00000063018.9	lncRNA	chrX_7200000	0.4882	0.1889	-0.324	0.6889	0.6308	-0.0581	.
2010308F09Rik	ENSMUSG00000100714.8	lncRNA	chrX_13100000	0.0624	0.1099	0.0631	0.8174	0.8898	0.0724	.
2010309G21Rik	ENSMUSG00000106567.3	lncRNA	chr16_18900000	0.1963	0	-0.2586	0.5885	0.1967	-0.3918	.
2010310C07Rik	ENSMUSG00000101268.7	lncRNA	chr6_42350000	0.0316	0.0062	-0.036	0.5338	0.4115	-0.1223	.
2010315B03Rik	ENSMUSG00000074829.11	protein_coding	chr9_124050000	0.2684	4.0202	1.9847	0.3513	0.3311	-0.0202	.
2010320M18Rik	ENSMUSG00000100691.4	lncRNA	chr8_71200000	9.9222	55.6975	2.376	0.9544	0.9456	-0.0088	.
2010320O07Rik	ENSMUSG00000089983.5	lncRNA	chr18_38300000	0.0078	0.0019	-0.0084	0.9668	0.8893	-0.0775	.
2200002D01Rik	ENSMUSG00000030587.6	protein_coding	chr7_28900000	9.0266	0.0432	-3.2648	0.9203	0.8194	-0.1008	.
2200002J24Rik	ENSMUSG00000013083.10	protein_coding	chr7_30350000	0.1034	0.0699	-0.0445	0.9556	0.7762	-0.1794	.
2210011K15Rik	ENSMUSG00000101791.3	lncRNA	chr1_121250000	0	0	0	0.5828	0.505	-0.0777	.
2210016L21Rik	ENSMUSG00000029559.16	protein_coding	chr5_115050000	14.736	33.247	1.1219	0.9923	0.9517	-0.0406	.
2210017I01Rik	ENSMUSG00000103523.2	protein_coding	chr3_92500000	0	0	0	0.2917	0.0553	-0.2363	.
2210020O09Rik	ENSMUSG00000116714.3	lncRNA	chr16_32250000	0	0	0	0.9026	0.9573	0.0548	.
2210022D18Rik	ENSMUSG00000100932.3	lncRNA	chr13_37600000	1.9069	0.1194	-1.3768	0.8009	0.8017	0.0008	.
2210039B01Rik	ENSMUSG00000113800.3	lncRNA	chr12_73550000	0.0957	0.0283	-0.0916	0.7569	0.9877	0.2308	.
2210404E10Rik	ENSMUSG00000114772.3	lncRNA	chr19_10650000	0	0	0	0.9776	0.805	-0.1727	.
2210406O10Rik	ENSMUSG00000039563.9	lncRNA	chr5_36600000	0.0754	0.2171	0.1785	0.9608	0.9536	-0.0072	.
2210408F21Rik	ENSMUSG00000087380.10	lncRNA	chr6_31350000	0.0539	0.0652	0.0154	0.7994	0.8935	0.0941	.
2210408I21Rik	ENSMUSG00000071252.7	protein_coding	chr13_77550000	0.054	0.096	0.0564	0.3441	0.1313	-0.2128	.
2210409D07Rik	ENSMUSG00000118322.3	lncRNA	chr18_57750000	0	0.0109	0.0157	0.5737	0.7337	0.16	.
2210411M09Rik	ENSMUSG00000085563.3	lncRNA	chr1_180750000	0.2385	0	-0.3086	0.9324	0.9076	-0.0249	.
2210414B05Rik	ENSMUSG00000085394.4	lncRNA	chr4_3650000	0	0	0	0.6982	0.7123	0.0141	.
2210414F02Rik	ENSMUSG00000111043.3	lncRNA	chr9_69950000	0	0	0	0.8769	0.9131	0.0362	.
2210417A02Rik	ENSMUSG00000086494.4	lncRNA	chr5_148650000	0.5395	0.0016	-0.6202	0.7793	0.5874	-0.1919	.
2210420H20Rik	ENSMUSG00000101773.2	lncRNA	chr18_82750000	0.4799	0	-0.5655	0.7524	0.8015	0.0491	.
2300002M23Rik	ENSMUSG00000039269.6	protein_coding	chr17_35850000	2.739	0	-1.9026	0.901	0.9345	0.0334	.
2300009A05Rik	ENSMUSG00000032403.9	protein_coding	chr9_63300000	1.36	4.9161	1.3259	0.8348	0.9112	0.0763	.
2310001H17Rik	ENSMUSG00000097354.10	lncRNA	chr6_129100000	0.004	0.0041	0.0002	0.3809	0.2696	-0.1113	.
2310001K24Rik	ENSMUSG00000053353.7	lncRNA	chr2_163300000	0.2749	1.0981	0.7187	0.7219	0.6773	-0.0446	.
2310002D06Rik	ENSMUSG00000112701.4	lncRNA	chr12_80550000	0	0	0	0.8968	0.9856	0.0888	.
2310002F09Rik	ENSMUSG00000097178.10	lncRNA	chr7_43350000	0.0101	0.0016	-0.0122	0.8565	0.4472	-0.4092	.
2310002L09Rik	ENSMUSG00000028396.6	protein_coding	chr4_73850000	0	0	0	0.2845	0.1376	-0.1469	.
2310003L06Rik	ENSMUSG00000007457.4	protein_coding	chr5_88100000	2.9433	0	-1.9794	0.0968	0.0431	-0.0537	.
2310003N18Rik	ENSMUSG00000110916.3	lncRNA	chr9_50150000	0	0.001	0.0014	0.8018	0.9826	0.1808	.
2310005A03Rik	ENSMUSG00000087254.2	lncRNA	chr2_154900000	0	0	0	0.801	0.8079	0.0069	.
2310005E17Rik	ENSMUSG00000099446.3	lncRNA	chr13_98550000	0	0	0	0.8198	0.6628	-0.157	.
2310008N11Rik	ENSMUSG00000100335.4	lncRNA	chr8_27300000	0.0101	0	-0.0145	0.9063	0.5918	-0.3145	.
2310009B15Rik	ENSMUSG00000079283.3	protein_coding	chr1_138750000	1.6671	12.5856	2.3487	0.4995	0.4556	-0.0439	.
2310010J17Rik	ENSMUSG00000097162.5	lncRNA	chr7_89750000	0.2015	4.0626	2.075	0.4557	0.6692	0.2135	.
2310011J03Rik	ENSMUSG00000020133.9	protein_coding	chr10_80150000	9.8824	83.1751	2.9514	0.974	0.9427	-0.0313	.
2310014F06Rik	ENSMUSG00000085945.5	lncRNA	chr7_112200000	0.0245	0.2747	0.3152	0.7936	0.9212	0.1275	.
2310015A10Rik	ENSMUSG00000097729.5	lncRNA	chr12_80150000	0.0813	1.5783	1.2537	0.7996	0.9882	0.1885	.
2310015A16Rik	ENSMUSG00000117879.3	lncRNA	chr17_32100000	0.0596	0	-0.0835	0.987	0.8485	-0.1386	.
2310015D24Rik	ENSMUSG00000099411.4	lncRNA	chr16_13300000	0.2501	0.0034	-0.3171	0.9517	0.7691	-0.1826	.
2310016D03Rik	ENSMUSG00000102098.4	lncRNA	chr12_30500000	0	0	0	0.7755	0.4429	-0.3327	.
2310016D23Rik	ENSMUSG00000085965.4	lncRNA	chr1_60800000	0	0	0	0.5941	0.7597	0.1656	.
2310016G11Rik	ENSMUSG00000070574.5	lncRNA	chr7_44300000	0	0.0795	0.1103	0.9923	0.8921	-0.1002	.
2310020H05Rik	ENSMUSG00000100410.4	lncRNA	chr13_99200000	0.0142	0	-0.0204	0.763	0.8613	0.0984	.
2310022A10Rik	ENSMUSG00000049643.16	protein_coding	chr7_27250000	9.7039	4.3069	-1.0122	0.9005	0.9432	0.0427	.
2310022B05Rik	ENSMUSG00000031983.8	protein_coding	chr8_125350000	5.347	22.5423	1.8911	0.9651	0.8712	-0.0939	.
2310026I22Rik	ENSMUSG00000097710.4	lncRNA	chr18_33000000	0	0.0055	0.008	0.739	0.6296	-0.1094	.
2310026L22Rik	ENSMUSG00000078519.5	lncRNA	chr4_137900000	0	0.0303	0.043	0.9483	0.9291	-0.0192	.
2310030A07Rik	ENSMUSG00000099447.2	lncRNA	chr1_150150000	0.0192	0.0016	-0.0251	0.2595	0.1424	-0.117	.
2310030G06Rik	ENSMUSG00000032062.4	protein_coding	chr9_50650000	3.3097	0.0095	-2.094	0.8583	0.9038	0.0455	.
2310033P09Rik	ENSMUSG00000020441.7	protein_coding	chr11_59050000	26.3036	48.9348	0.871	0.9787	0.8711	-0.1076	.
2310034G01Rik	ENSMUSG00000099655.3	protein_coding	chr19_46300000	0.6019	2.0452	0.9267	0.9916	0.9616	-0.03	.
2310034O05Rik	ENSMUSG00000100157.9	lncRNA	chr5_100300000	0.05	0	-0.0704	0.8315	0.4805	-0.3511	.
2310039H08Rik	ENSMUSG00000062619.7	protein_coding	chr17_47050000	17.6652	66.7269	1.8594	0.9461	0.963	0.017	.
2310039L15Rik	ENSMUSG00000100550.4	lncRNA	chr10_95150000	0.0497	0	-0.07	0.6948	0.7658	0.0709	.
2310040G24Rik	ENSMUSG00000101655.4	lncRNA	chr6_86450000	0.3501	1.6196	0.9562	0.867	0.9237	0.0566	.
2310043L19Rik	ENSMUSG00000101746.4	lncRNA	chr1_177450000	0	0.0101	0.0146	0.5669	0.698	0.1311	.
2310043M15Rik	ENSMUSG00000097768.5	lncRNA	chr16_93550000	36.0531	0	-5.2115	0.9796	0.9807	0.0011	.
2310043O21Rik	ENSMUSG00000102106.4	lncRNA	chr15_38500000	0	0.0049	0.007	0.7103	0.908	0.1977	.
2310044K18Rik	ENSMUSG00000085080.3	lncRNA	chr7_83300000	0	0.0841	0.1164	0.6533	0.7603	0.107	.
2310047K21Rik	ENSMUSG00000120507.2	lncRNA	chr2_104650000	0.3774	7.6367	2.6485	0.6387	0.6995	0.0608	.
2310057J18Rik	ENSMUSG00000015519.13	protein_coding	chr10_28800000	0	0	0	0.3744	0.1167	-0.2577	.
2310057M21Rik	ENSMUSG00000040177.11	protein_coding	chr7_130900000	2.4065	2.2021	-0.0893	0.8175	0.4319	-0.3856	.
2310058D17Rik	ENSMUSG00000085379.4	lncRNA	chr11_58850000	0.7771	2.7371	1.0724	0.9252	0.7649	-0.1603	.
2310061I04Rik	ENSMUSG00000050705.16	protein_coding	chr17_36200000	46.6678	21.9967	-1.0516	0.8537	0.8929	0.0392	.
2310065F04Rik	ENSMUSG00000087410.9	lncRNA	chr11_66950000	0.0417	0	-0.059	0.8469	0.6757	-0.1711	.
2310067P03Rik	ENSMUSG00000114372.2	lncRNA	chr13_83250000	0	0	0	0.1755	0.208	0.0326	.
2310068J16Rik	ENSMUSG00000100084.4	lncRNA	chr15_99850000	3.6243	1.2865	-1.0161	0.8264	0.8848	0.0584	.
2310069B03Rik	ENSMUSG00000100291.8	lncRNA	chr6_82850000	0.3906	0	-0.4757	0.761	0.6345	-0.1264	.
2310069G16Rik	ENSMUSG00000121790.2	lncRNA	chr15_44700000	0.0027	0.0071	0.0064	0.3515	0.283	-0.0685	.
2310074N15Rik	ENSMUSG00000105858.2	lncRNA	chr5_24650000	0	1.2689	1.182	0.9602	0.9054	-0.0548	.
2310075C17Rik	ENSMUSG00000089718.4	lncRNA	chr9_112050000	0.2733	0.0675	-0.2543	0.4951	0.2497	-0.2454	.
2310079G19Rik	ENSMUSG00000045331.4	protein_coding	chr16_88400000	0	0	0	0.2312	0.3109	0.0797	.
2310081O03Rik	ENSMUSG00000085020.3	lncRNA	chr4_56300000	0.0012	0.015	0.0197	0.5487	0.6529	0.1042	.
2410002F23Rik	ENSMUSG00000045411.17	protein_coding	chr7_43850000	48.3553	49.8159	0.0421	0.9687	0.5659	-0.4028	.
2410003I16Rik	ENSMUSG00000116947.4	lncRNA	chr16_93800000	4.5225	0.0105	-2.4503	0.8141	0.8214	0.0073	.
2410003L11Rik	ENSMUSG00000085860.4	lncRNA	chr11_97450000	1.3483	0.0006	-1.2308	0.9725	0.9668	-0.0058	.
2410004B18Rik	ENSMUSG00000036873.14	protein_coding	chr3_145600000	7.8974	17.022	1.0183	0.6891	0.8197	0.1306	.
2410004I01Rik	ENSMUSG00000085338.3	lncRNA	chr11_102850000	0.0269	0	-0.0383	0.9871	0.9635	-0.0235	.
2410004P03Rik	ENSMUSG00000071398.9	protein_coding	chr12_17050000	0.4	0.0999	-0.348	0.9357	0.9735	0.0378	.
2410006H16Rik	ENSMUSG00000086841.4	lncRNA	chr11_62450000	58.6394	177.315	1.5801	0.9634	0.9703	0.0069	.
2410012E07Rik	ENSMUSG00000099528.3	lncRNA	chr14_71050000	0.0168	0.0062	-0.0151	0.6385	0.5107	-0.1278	.
2410017I17Rik	ENSMUSG00000038311.16	lncRNA	chr17_36450000	0.223	0	-0.2904	0.8715	0.5739	-0.2976	.
2410018L13Rik	ENSMUSG00000073164.13	lncRNA	chr12_23000000	0.587	0.0526	-0.5924	0.9213	0.3625	-0.5587	Bottom
2410021H03Rik	ENSMUSG00000100572.3	lncRNA	chr17_69550000	4.5779	0	-2.4797	0.5938	0.2592	-0.3346	.
2410022M11Rik	ENSMUSG00000100017.4	lncRNA	chr14_57050000	0.804	4.5458	1.6202	0.8237	0.5798	-0.2439	.
2410124H12Rik	ENSMUSG00000051297.11	lncRNA	chr16_92250000	0.0582	0.0009	-0.0803	0.8773	0.9749	0.0977	.
2410137M14Rik	ENSMUSG00000064308.11	protein_coding	chr17_37250000	10.0425	0.1715	-3.2367	0.7569	0.7188	-0.0381	.
2410152P15Rik	ENSMUSG00000084825.2	lncRNA	chr19_6650000	0.0029	0	-0.0042	0.9903	0.955	-0.0353	.
2500002B13Rik	ENSMUSG00000096917.5	lncRNA	chr8_57900000	3.0335	0.7971	-1.1663	0.5738	0.7546	0.1808	.
2500004C02Rik	ENSMUSG00000073236.7	lncRNA	chr2_153150000	2.3003	25.4507	3.0026	0.8838	0.8455	-0.0383	.
2510002D24Rik	ENSMUSG00000071632.11	protein_coding	chr16_18650000	3.7215	1.4737	-0.9326	0.804	0.6625	-0.1415	.
2510009E07Rik	ENSMUSG00000043391.11	protein_coding	chr16_21450000	5.1347	17.5427	1.5958	0.8932	0.8285	-0.0647	.
2510017J16Rik	ENSMUSG00000104891.2	lncRNA	chr5_3600000	5.5739	1.3739	-1.4695	0.5985	0.7111	0.1126	.
2510039O18Rik	ENSMUSG00000044496.7	protein_coding	chr4_148000000	41.91	37.1803	-0.1685	0.9865	0.729	-0.2576	.
2510046G10Rik	ENSMUSG00000066175.5	lncRNA	chr7_126200000	2.0336	5.8098	1.1666	0.9246	0.9315	0.0069	.
2600002D14Rik	ENSMUSG00000116797.2	lncRNA	chr16_36650000	2.3497	1.4318	-0.462	0.4908	0.6356	0.1448	.
2600006K01Rik	ENSMUSG00000039798.4	lncRNA	chr2_29750000	1.1505	0.5175	-0.503	0.9711	0.9876	0.0165	.
2600014E21Rik	ENSMUSG00000100303.6	lncRNA	chr2_75050000	0.0009	0	-0.0013	0.6172	0.7412	0.1239	.
2610008E11Rik	ENSMUSG00000060301.7	protein_coding	chr10_78900000	0.542	6.6257	2.306	0.5401	0.5301	-0.01	.
2610016A17Rik	ENSMUSG00000101089.4	lncRNA	chr19_25600000	0.1602	0.2475	0.1048	0.8964	0.4924	-0.404	.
2610017A05Rik	ENSMUSG00000128302.1	lncRNA	chr6_148700000	0	0	0	0.5561	0.4546	-0.1015	.
2610020C07Rik	ENSMUSG00000097537.5	lncRNA	chr16_11000000	0.2929	0.1455	-0.1746	0.9506	0.8699	-0.0807	.
2610021A01Rik	ENSMUSG00000091474.3	protein_coding	chr7_41200000	14.2286	3.8582	-1.6483	0.5084	0.3696	-0.1388	.
2610027F03Rik	ENSMUSG00000099957.6	lncRNA	chr1_120550000	0	0.0032	0.0046	0.6485	0.5819	-0.0667	.
2610027K06Rik	ENSMUSG00000087013.10	lncRNA	chr11_85700000	0.0041	0.0358	0.0449	0.9535	0.8884	-0.0651	.
2610028E06Rik	ENSMUSG00000085562.9	lncRNA	chr4_125750000	0.2921	0	-0.3697	0.9855	0.4124	-0.5731	Bottom
2610028H24Rik	ENSMUSG00000009114.18	protein_coding	chr10_76250000	0.0432	0	-0.061	0.9379	0.8839	-0.054	.
2610029K11Rik	ENSMUSG00000120681.2	lncRNA	chr17_34800000	0.254	16.894	3.8348	0.9961	0.819	-0.1771	.
2610035D17Rik	ENSMUSG00000087259.10	lncRNA	chr11_112950000	0.0448	0.9698	0.9148	0.6754	0.8118	0.1364	.
2610035F20Rik	ENSMUSG00000085555.12	lncRNA	chr14_122700000	0.7401	1.2498	0.3706	0.5602	0.591	0.0307	.
2610037D02Rik	ENSMUSG00000097536.4	lncRNA	chr15_96000000	0.2112	0.1058	-0.1313	0.8054	0.6468	-0.1587	.
2610042L04Rik	ENSMUSG00000079388.10	protein_coding	chr14_18100000	0.0344	0.0012	-0.0471	0.5238	0.1745	-0.3493	.
2610203C22Rik	ENSMUSG00000079671.11	lncRNA	chr1_9550000	0.0437	0.0903	0.0629	0.4232	0.3036	-0.1196	.
2610204G07Rik	ENSMUSG00000084860.3	lncRNA	chr13_104800000	0	0	0	0.3143	0.5203	0.206	.
2610206C17Rik	ENSMUSG00000085236.5	lncRNA	chr7_84300000	0.0115	0.0045	-0.01	0.4742	0.5774	0.1032	.
2610300M13Rik	ENSMUSG00000107479.3	lncRNA	chr6_66400000	0.9662	0.0241	-0.9411	0.3446	0.411	0.0664	.
2610303G11Rik	ENSMUSG00000046995.5	lncRNA	chr9_98050000	0	0.0363	0.0515	0.6089	0.1463	-0.4626	Bottom
2610306M01Rik	ENSMUSG00000100164.3	lncRNA	chr6_86800000	0.3137	6.6491	2.5417	0.8644	0.9842	0.1199	.
2610307P16Rik	ENSMUSG00000085936.10	lncRNA	chr13_28800000	0.0139	0.0872	0.1007	0.5121	0.9026	0.3905	Top
2610316D01Rik	ENSMUSG00000097040.9	lncRNA	chr3_45200000	0	0.3785	0.4631	0.3332	0.2497	-0.0835	.
2610318M16Rik	ENSMUSG00000114532.3	lncRNA	chr14_14050000	0	0.0013	0.0019	0.7547	0.4868	-0.2679	.
2610318N02Rik	ENSMUSG00000049916.13	protein_coding	chr16_16900000	13.8884	1.282	-2.7058	0.9638	0.8646	-0.0992	.
2610507I01Rik	ENSMUSG00000085882.4	lncRNA	chr11_59050000	2.1127	17.3047	2.556	0.9787	0.8711	-0.1076	.
2610528J11Rik	ENSMUSG00000028536.13	protein_coding	chr4_118350000	0.334	0	-0.4158	0.9489	0.6692	-0.2797	.
2700016F22Rik	ENSMUSG00000120907.2	lncRNA	chr4_139100000	4.2094	0.5832	-1.7182	0.9762	0.9666	-0.0096	.
2700033N17Rik	ENSMUSG00000086328.4	lncRNA	chr2_115850000	0.5417	5.7125	2.1223	0.5263	0.6682	0.1419	.
2700038G22Rik	ENSMUSG00000097180.8	lncRNA	chr5_24050000	15.3444	1.5224	-2.6959	0.8636	0.8981	0.0345	.
2700046A07Rik	ENSMUSG00000041789.9	lncRNA	chr18_62850000	2.1371	0.0182	-1.6235	0.7254	0.6257	-0.0998	.
2700049A03Rik	ENSMUSG00000034601.18	protein_coding	chr12_71200000	2.0013	0.9279	-0.6385	0.7179	0.9352	0.2173	.
2700054A10Rik	ENSMUSG00000117042.3	lncRNA	chr17_13650000	0.0386	0.0228	-0.0221	0.8687	0.5675	-0.3012	.
2700062C07Rik	ENSMUSG00000024273.9	protein_coding	chr18_24600000	9.0583	9.7884	0.1011	0.7579	0.7519	-0.0061	.
2700068H02Rik	ENSMUSG00000086172.2	lncRNA	chr4_106400000	0.4827	0.3682	-0.116	0.8464	0.9348	0.0884	.
2700069I18Rik	ENSMUSG00000086224.10	lncRNA	chr3_5250000	0	0.0084	0.0121	0.2546	0.4415	0.1868	.
2700089I24Rik	ENSMUSG00000100119.2	lncRNA	chr19_59450000	0	0	0	0.7871	0.6404	-0.1467	.
2700097O09Rik	ENSMUSG00000062198.6	protein_coding	chr12_55050000	0.9868	1.465	0.3112	0.7754	0.8156	0.0402	.
2700099C18Rik	ENSMUSG00000121491.2	lncRNA	chr17_95050000	0.3536	0.1124	-0.2831	0.4631	0.3539	-0.1092	.
2810001A02Rik	ENSMUSG00000120224.2	lncRNA	chr15_86050000	1.1521	4.916	1.4589	0.8964	0.8323	-0.064	.
2810001G20Rik	ENSMUSG00000087497.10	lncRNA	chr11_64000000	0.0315	0.6812	0.7047	0.8158	0.4674	-0.3483	.
2810002D19Rik	ENSMUSG00000045464.8	lncRNA	chr2_94200000	0.5173	1.5241	0.7343	0.4897	0.6934	0.2037	.
2810004N23Rik	ENSMUSG00000031984.9	protein_coding	chr8_125550000	9.5135	8.3931	-0.1626	0.9383	0.8931	-0.0452	.
2810013P06Rik	ENSMUSG00000099881.4	lncRNA	chr8_123750000	7.5321	30.8714	1.9013	0.9084	0.9095	0.0011	.
2810021J22Rik	ENSMUSG00000020491.16	protein_coding	chr11_58750000	1.6844	4.2774	0.9752	0.8648	0.6507	-0.2141	.
2810029C07Rik	ENSMUSG00000096995.5	lncRNA	chr12_111500000	0.1046	3.5253	2.0345	0.7787	0.8849	0.1061	.
2810030D12Rik	ENSMUSG00000099338.4	lncRNA	chr8_13200000	0.2378	0.0688	-0.2118	0.9875	0.9135	-0.0739	.
2810032G03Rik	ENSMUSG00000037735.9	lncRNA	chr12_5450000	0.004	0.0277	0.0337	0.8251	0.5447	-0.2804	.
2810036E18Rik	ENSMUSG00000120148.2	lncRNA	chr2_130100000	4.6944	0.5361	-1.8903	0.8464	0.902	0.0556	.
2810402E24Rik	ENSMUSG00000099966.4	lncRNA	chr14_20650000	1.3816	17.7483	2.9767	0.8248	0.909	0.0842	.
2810403D21Rik	ENSMUSG00000086629.11	lncRNA	chrX_107850000	0.0921	0.3291	0.2834	0.2489	0.4731	0.2242	.
2810403G07Rik	ENSMUSG00000114656.2	lncRNA	chr13_112550000	0.8119	0.0196	-0.8295	0.6438	0.7776	0.1338	.
2810404F17Rik	ENSMUSG00000085329.2	lncRNA	chr16_95600000	0	0	0	0.8537	0.6914	-0.1622	.
2810404M03Rik	ENSMUSG00000102046.3	lncRNA	chr8_42250000	0	0	0	0.3919	0.1515	-0.2404	.
2810405F17Rik	ENSMUSG00000101493.4	lncRNA	chr4_137100000	0.4803	1.248	0.6028	0.9776	0.8846	-0.093	.
2810407A14Rik	ENSMUSG00000055972.7	lncRNA	chr16_87650000	0.0052	0.0035	-0.0025	0.3166	0.2185	-0.0981	.
2810408A11Rik	ENSMUSG00000018570.18	protein_coding	chr11_69750000	2.9255	21.9628	2.5484	0.9707	0.9918	0.0211	.
2810408I11Rik	ENSMUSG00000087213.5	lncRNA	chr1_64700000	1.7006	1.6894	-0.006	0.6947	0.7823	0.0876	.
2810414N06Rik	ENSMUSG00000100594.4	lncRNA	chr1_151600000	0.0625	1.5141	1.2426	0.5911	0.7387	0.1476	.
2810429I04Rik	ENSMUSG00000097709.11	lncRNA	chr13_3500000	3.9027	0.2565	-1.9642	0.586	0.2804	-0.3056	.
2810430I11Rik	ENSMUSG00000085766.2	lncRNA	chr2_27750000	0.0807	0.161	0.1034	0.9806	0.9616	-0.019	.
2810432F15Rik	ENSMUSG00000104987.2	lncRNA	chr5_131650000	0.0173	0	-0.0247	0.722	0.7114	-0.0106	.
2810433D01Rik	ENSMUSG00000086283.9	lncRNA	chr11_102500000	0	0.2119	0.2773	0.9713	0.9344	-0.037	.
2810442N19Rik	ENSMUSG00000090260.3	lncRNA	chr1_161800000	0	0.0036	0.0051	0.6087	0.7761	0.1674	.
2810449D17Rik	ENSMUSG00000120362.2	lncRNA	chr19_33350000	0.1221	0.2939	0.2055	0.5156	0.3228	-0.1929	.
2810454H06Rik	ENSMUSG00000100876.2	lncRNA	chr6_134850000	1.0305	2.6283	0.8374	0.6093	0.8088	0.1995	.
2810455O05Rik	ENSMUSG00000085030.2	lncRNA	chr8_124550000	1.1065	1.7575	0.3885	0.8976	0.9592	0.0616	.
2810457G06Rik	ENSMUSG00000115410.2	lncRNA	chr14_47100000	0	1.4719	1.3056	0.832	0.8397	0.0077	.
2810459M11Rik	ENSMUSG00000026227.12	protein_coding	chr1_85950000	0.2013	157.343	7.0423	0.8503	0.88	0.0297	.
2810461L16Rik	ENSMUSG00000121196.2	lncRNA	chr2_180500000	0.0168	0	-0.024	0.935	0.6729	-0.2621	.
2810471M01Rik	ENSMUSG00000084966.3	lncRNA	chr11_28700000	0	0	0	0.3313	0.1359	-0.1954	.
2900005J15Rik	ENSMUSG00000043833.9	lncRNA	chr5_25300000	0.2862	1.165	0.7513	0.8416	0.7898	-0.0518	.
2900009J06Rik	ENSMUSG00000102014.3	lncRNA	chr1_127650000	0.1642	0.133	-0.0392	0.5963	0.4334	-0.1629	.
2900026A02Rik	ENSMUSG00000051339.11	protein_coding	chr5_113350000	1.9427	0.6505	-0.8343	0.9966	0.7312	-0.2654	.
2900040C04Rik	ENSMUSG00000115625.3	lncRNA	chr14_76500000	0	0	0	0.8101	0.8705	0.0604	.
2900041M22Rik	ENSMUSG00000054418.8	lncRNA	chr11_117500000	1.425	0	-1.278	0.9444	0.937	-0.0074	.
2900042K21Rik	ENSMUSG00000103669.2	lncRNA	chr1_188900000	0	0.1261	0.1713	0.5615	0.6425	0.081	.
2900045O20Rik	ENSMUSG00000111938.3	lncRNA	chr12_4550000	0.0117	0.0914	0.1093	0.8253	0.8422	0.0169	.
2900052L18Rik	ENSMUSG00000043993.9	lncRNA	chr11_120100000	3.4968	3.8424	0.1068	0.9683	0.965	-0.0033	.
2900052N01Rik	ENSMUSG00000099696.9	lncRNA	chr9_46800000	0	0.2409	0.3114	0.8797	0.4755	-0.4042	.
2900057B20Rik	ENSMUSG00000117797.2	lncRNA	chr18_76200000	0	0.0376	0.0532	0.8535	0.884	0.0305	.
2900060B14Rik	ENSMUSG00000107722.3	lncRNA	chr1_118350000	0.4578	0.3203	-0.1429	0.7003	0.787	0.0867	.
2900060N12Rik	ENSMUSG00000113621.4	lncRNA	chr12_24800000	0.0334	0.8581	0.8464	0.8987	0.8102	-0.0885	.
2900072N19Rik	ENSMUSG00000087018.3	lncRNA	chr2_91850000	0.0897	0	-0.1239	0.8263	0.9747	0.1484	.
2900076A07Rik	ENSMUSG00000097277.10	lncRNA	chr7_81150000	0.6895	2.0195	0.8377	0.8639	0.8294	-0.0345	.
2900079G21Rik	ENSMUSG00000087038.12	lncRNA	chr9_112100000	0	0.0016	0.0024	0.4601	0.1064	-0.3537	.
2900089D17Rik	ENSMUSG00000087484.3	lncRNA	chr5_144150000	0.1319	0.4984	0.4048	0.8074	0.677	-0.1304	.
2900092C05Rik	ENSMUSG00000030385.5	protein_coding	chr7_12250000	0	0.0031	0.0045	0.3897	0.247	-0.1427	.
2900093K20Rik	ENSMUSG00000099632.4	lncRNA	chr2_163250000	2.5488	13.6797	2.0484	0.7981	0.7709	-0.0272	.
3010001F23Rik	ENSMUSG00000084885.9	lncRNA	chrX_151200000	0.0307	0.4046	0.4465	0.6279	0.4802	-0.1477	.
3010003L21Rik	ENSMUSG00000085355.5	lncRNA	chr6_148800000	2.4702	1.6526	-0.3876	0.6846	0.5551	-0.1295	.
3100003L05Rik	ENSMUSG00000086254.3	lncRNA	chr7_124200000	0	0.7111	0.7749	0.5288	0.2531	-0.2757	.
3110004A20Rik	ENSMUSG00000085588.3	lncRNA	chr11_40350000	0.0025	0	-0.0036	0.3619	0.2619	-0.1	.
3110006O06Rik	ENSMUSG00000114649.3	lncRNA	chr13_78300000	0.0289	0.0121	-0.0238	0.3906	0.5656	0.1749	.
3110009E18Rik	ENSMUSG00000026388.16	protein_coding	chr1_120100000	0.1411	0.5041	0.3986	0.6663	0.7095	0.0432	.
3110009F21Rik	ENSMUSG00000113331.2	lncRNA	chr12_110100000	0	0	0	0.8963	0.3834	-0.5129	Bottom
3110015C05Rik	ENSMUSG00000114824.3	lncRNA	chr13_111350000	0	0.0015	0.0022	0.5168	0.6903	0.1735	.
3110018I06Rik	ENSMUSG00000060375.3	lncRNA	chr12_107450000	0	0	0	0.7595	0.469	-0.2905	.
3110039M20Rik	ENSMUSG00000104861.3	lncRNA	chr12_49500000	0	0	0	0.2662	0.1254	-0.1408	.
3110040M04Rik	ENSMUSG00000114582.3	protein_coding	chr1_151050000	0.1114	0	-0.1523	0.5231	0.4	-0.1231	.
3110040N11Rik	ENSMUSG00000025102.15	protein_coding	chr7_81400000	5.2891	12.9554	1.1499	0.7879	0.7869	-0.001	.
3110045C21Rik	ENSMUSG00000097503.5	lncRNA	chr1_169800000	0.4381	7.0428	2.4835	0.4794	0.6621	0.1827	.
3110053B16Rik	ENSMUSG00000121318.2	lncRNA	chr12_20900000	0.3238	0.2257	-0.1111	0.8773	0.5616	-0.3158	.
3110056K07Rik	ENSMUSG00000085622.11	lncRNA	chr12_71000000	0.6991	1.4405	0.5224	0.7198	0.9587	0.2389	.
3110070M22Rik	ENSMUSG00000074635.5	lncRNA	chr13_119600000	0.639	12.0866	2.9972	0.6726	0.8349	0.1623	.
3110082I17Rik	ENSMUSG00000053553.12	protein_coding	chr5_139400000	0.6403	0.9281	0.2332	0.9732	0.8263	-0.1469	.
3110082J24Rik	ENSMUSG00000086815.7	lncRNA	chr5_30300000	0.095	12.7796	3.6535	0.9171	0.933	0.0159	.
3110083C13Rik	ENSMUSG00000097303.5	lncRNA	chr14_58250000	0	0.0965	0.133	0.811	0.4897	-0.3213	.
3110099E03Rik	ENSMUSG00000085582.9	lncRNA	chr2_115300000	0.0021	0.0076	0.0078	0.1334	0.3469	0.2135	.
3200001D21Rik	ENSMUSG00000113434.2	lncRNA	chr12_88300000	0	0	0	0.434	0.5001	0.0662	.
3222401L13Rik	ENSMUSG00000073590.5	lncRNA	chr18_37750000	0.8029	1.2119	0.295	0.6427	0.5424	-0.1002	.
3300002A11Rik	ENSMUSG00000033731.12	lncRNA	chr12_99300000	0.0517	0.002	-0.0699	0.8317	0.8477	0.016	.
3300002I08Rik	ENSMUSG00000063364.11	protein_coding	chr2_150200000	0.0401	0.1395	0.1317	0.3963	0.1984	-0.1979	.
3300002P09Rik	ENSMUSG00000120873.2	lncRNA	chr10_80200000	1.6496	11.4739	2.2351	0.9576	0.9556	-0.0021	.
3300002P13Rik	ENSMUSG00000107585.3	lncRNA	chr7_3450000	0.1649	0.1337	-0.0392	0.8947	0.7329	-0.1618	.
3300005D01Rik	ENSMUSG00000096965.10	lncRNA	chr17_5850000	0	0.0152	0.0217	0.823	0.9393	0.1163	.
3425401B19Rik	ENSMUSG00000071540.5	protein_coding	chr14_32350000	0.0206	0.0063	-0.0204	0.9073	0.5177	-0.3896	.
3632454L22Rik	ENSMUSG00000089759.9	lncRNA	chrX_133950000	0.0325	0.0019	-0.0435	0.6907	0.5246	-0.1661	.
3830408C21Rik	ENSMUSG00000071181.4	lncRNA	chr13_107250000	0.0487	0.1189	0.0935	0.5767	0.5179	-0.0588	.
3830432H09Rik	ENSMUSG00000101731.2	lncRNA	chr1_119450000	0.7142	1.347	0.4533	0.7378	0.6467	-0.0911	.
4122401K19Rik	ENSMUSG00000120104.2	lncRNA	chr19_12550000	0.4954	0.1071	-0.4338	0.6781	0.4411	-0.237	.
4631405J19Rik	ENSMUSG00000075027.13	lncRNA	chr2_92850000	0.0099	0.0663	0.0784	0.8431	0.988	0.1448	.
4632404H12Rik	ENSMUSG00000042579.5	lncRNA	chr3_89650000	2.3819	6.1899	1.0881	0.9189	0.9965	0.0775	.
4632404M16Rik	ENSMUSG00000106296.2	lncRNA	chr3_102000000	0	0.0556	0.078	0.89	0.8091	-0.081	.
4632411P08Rik	ENSMUSG00000097561.2	lncRNA	chr5_29550000	0.1039	0.0411	-0.0845	0.8186	0.6528	-0.1658	.
4632427E13Rik	ENSMUSG00000074024.8	lncRNA	chr7_92350000	18.3513	4.7915	-1.7404	0.5088	0.647	0.1382	.
4632428C04Rik	ENSMUSG00000097184.5	lncRNA	chr16_29800000	0.0193	0.0319	0.0177	0.9259	0.925	-0.0009	.
4731419I09Rik	ENSMUSG00000097004.2	lncRNA	chr3_89200000	0.2829	0.204	-0.0916	0.9907	0.9317	-0.059	.
4732414G09Rik	ENSMUSG00000086943.4	lncRNA	chr11_72900000	0.0139	0.1551	0.1881	0.6825	0.8269	0.1445	.
4732419C18Rik	ENSMUSG00000097203.5	lncRNA	chr8_124450000	0.0849	0.222	0.1717	0.968	0.951	-0.017	.
4732440D04Rik	ENSMUSG00000090031.5	lncRNA	chr1_6200000	0.197	0.3723	0.1972	0.4769	0.2749	-0.202	.
4732463B04Rik	ENSMUSG00000097762.3	lncRNA	chr12_84050000	0.01	0.002	-0.0114	0.9239	0.9711	0.0472	.
4732465J04Rik	ENSMUSG00000101517.9	lncRNA	chr10_95550000	0.9295	0.0008	-0.9471	0.6037	0.6644	0.0607	.
4732471J01Rik	ENSMUSG00000053714.11	lncRNA	chr7_25250000	0.1145	0.0231	-0.1234	0.8323	0.6201	-0.2121	.
4732487G21Rik	ENSMUSG00000097488.3	lncRNA	chr12_86300000	0.0327	0.0043	-0.0403	0.7452	0.8422	0.097	.
4732490B19Rik	ENSMUSG00000085421.4	lncRNA	chr11_113050000	0.0566	0.025	-0.0438	0.7824	0.8354	0.053	.
4732491K20Rik	ENSMUSG00000097350.5	lncRNA	chr17_12500000	0.0307	0.7679	0.7784	0.9286	0.9538	0.0252	.
4732496C06Rik	ENSMUSG00000108456.2	lncRNA	chr7_116100000	0.5648	2.0485	0.9621	0.5138	0.5878	0.074	.
4831440D22Rik	ENSMUSG00000110138.3	lncRNA	chr8_92150000	0.0046	0.0016	-0.0043	0.796	0.728	-0.068	.
4833403J16Rik	ENSMUSG00000107481.2	lncRNA	chr6_48700000	0	0	0	0.898	0.9017	0.0036	.
4833405L11Rik	ENSMUSG00000113544.2	lncRNA	chr12_29150000	0.1409	0	-0.1902	0.8666	0.8697	0.0031	.
4833407H14Rik	ENSMUSG00000097779.5	lncRNA	chr19_53400000	0.3503	0.0101	-0.4187	0.8167	0.8589	0.0422	.
4833411C07Rik	ENSMUSG00000109089.4	lncRNA	chr8_10950000	0.0725	0	-0.101	0.7802	0.8654	0.0852	.
4833412C05Rik	ENSMUSG00000097697.5	lncRNA	chr7_67450000	0	0.0024	0.0034	0.7199	0.616	-0.1039	.
4833413E03Rik	ENSMUSG00000013562.14	lncRNA	chr17_31750000	0.0938	0.0686	-0.0336	0.9819	0.8735	-0.1083	.
4833413G10Rik	ENSMUSG00000104950.2	lncRNA	chr5_3650000	2.4131	7.7569	1.3594	0.672	0.6988	0.0268	.
4833415N18Rik	ENSMUSG00000115936.4	lncRNA	chr16_11550000	0.0535	0	-0.0752	0.9255	0.5976	-0.3279	.
4833417C18Rik	ENSMUSG00000086015.4	lncRNA	chr11_95700000	2.8757	0.3644	-1.5062	0.971	0.873	-0.098	.
4833418N02Rik	ENSMUSG00000085287.11	lncRNA	chr17_87550000	0.0634	1.1668	1.0269	0.7659	0.8745	0.1086	.
4833419F23Rik	ENSMUSG00000117401.3	lncRNA	chr18_4350000	0.0206	0.0147	-0.0083	0.846	0.7321	-0.114	.
4833419O12Rik	ENSMUSG00000116922.2	lncRNA	chr16_20600000	0.1141	0.0133	-0.1368	0.9056	0.7889	-0.1167	.
4833420G17Rik	ENSMUSG00000062822.9	protein_coding	chr13_119600000	3.6156	2.7588	-0.2962	0.6726	0.8349	0.1623	.
4833422C13Rik	ENSMUSG00000074782.5	lncRNA	chr13_91800000	0	0.0006	0.0009	0.3792	0.4916	0.1124	.
4833427F10Rik	ENSMUSG00000092171.3	lncRNA	chr17_36050000	0	0.0028	0.0041	0.8943	0.9194	0.0251	.
4833428L15Rik	ENSMUSG00000097074.3	lncRNA	chr9_45300000	0.0564	0.0218	-0.0481	0.9805	0.9591	-0.0213	.
4833438C02Rik	ENSMUSG00000118087.4	lncRNA	chr19_46250000	1.6807	10.4352	2.0928	0.9482	0.9653	0.0172	.
4833439L19Rik	ENSMUSG00000025871.19	protein_coding	chr13_54700000	29.3699	58.5995	0.9727	0.9743	0.8618	-0.1125	.
4833445I07Rik	ENSMUSG00000103103.4	lncRNA	chr9_108400000	1.293	1.5875	0.1743	0.9252	0.9301	0.0049	.
4921501I09Rik	ENSMUSG00000111916.3	lncRNA	chr12_4250000	0.0274	0.0574	0.0414	0.8239	0.7627	-0.0612	.
4921504A21Rik	ENSMUSG00000097626.8	lncRNA	chr5_19350000	0.0198	0.0509	0.0434	0.3483	0.2405	-0.1078	.
4921504E06Rik	ENSMUSG00000026734.10	protein_coding	chr2_19450000	0	0	0	0.6615	0.4201	-0.2414	.
4921507G05Rik	ENSMUSG00000097650.4	lncRNA	chr12_110800000	0.3865	0.1471	-0.2735	0.8326	0.9415	0.1089	.
4921508D12Rik	ENSMUSG00000027345.8	lncRNA	chr2_132250000	0	0	0	0.6006	0.512	-0.0887	.
4921509A06Rik	ENSMUSG00000091147.3	lncRNA	chr9_78500000	0	0	0	0.5469	0.6719	0.125	.
4921509O07Rik	ENSMUSG00000114790.3	lncRNA	chr13_113600000	0	0	0	0.5861	0.6907	0.1046	.
4921511C10Rik	ENSMUSG00000104585.2	lncRNA	chr3_79100000	0	0	0	0.5974	0.7477	0.1503	.
4921511I17Rik	ENSMUSG00000114136.3	lncRNA	chr12_12400000	0	0	0	0.7438	0.5747	-0.1692	.
4921513I03Rik	ENSMUSG00000044544.6	lncRNA	chr10_120600000	0.0187	0.0038	-0.0213	0.7444	0.7506	0.0062	.
4921513I08Rik	ENSMUSG00000108788.3	lncRNA	chr7_77900000	0	0	0	0.5165	0.4899	-0.0265	.
4921514A10Rik	ENSMUSG00000097620.9	lncRNA	chr4_140800000	0.0686	0.132	0.0831	0.9693	0.9108	-0.0585	.
4921515E04Rik	ENSMUSG00000098150.4	lncRNA	chr15_18350000	0	0.0001	0.0001	0.2491	0.0365	-0.2125	.
4921515G04Rik	ENSMUSG00000115829.3	lncRNA	chr15_35350000	0.0578	0.0284	-0.0407	0.73	0.5444	-0.1856	.
4921515L22Rik	ENSMUSG00000112406.3	lncRNA	chr10_87950000	0	0	0	0.5083	0.552	0.0437	.
4921516A02Rik	ENSMUSG00000112652.3	lncRNA	chr10_78250000	0.1001	0.0139	-0.1177	0.8788	0.8246	-0.0542	.
4921517D16Rik	ENSMUSG00000116877.3	lncRNA	chr16_57150000	0.0232	0	-0.0331	0.5413	0.5738	0.0325	.
4921517D22Rik	ENSMUSG00000049902.7	protein_coding	chr13_59800000	0	0	0	0.8893	0.9072	0.0179	.
4921518K17Rik	ENSMUSG00000085851.3	lncRNA	chr12_57650000	0	0	0	0.4095	0.2348	-0.1747	.
4921520J07Rik	ENSMUSG00000120564.2	lncRNA	chr7_128100000	0.2402	0.5097	0.2837	0.8778	0.8561	-0.0217	.
4921520N01Rik	ENSMUSG00000114342.2	lncRNA	chr13_26950000	0.0499	0	-0.0703	0.3809	0.5088	0.1279	.
4921521D15Rik	ENSMUSG00000104703.3	lncRNA	chr3_117750000	0	0	0	0.1188	0.1343	0.0156	.
4921522P10Rik	ENSMUSG00000040467.3	lncRNA	chr8_8700000	0.0369	0.0053	-0.0447	0.6098	0.6483	0.0385	.
4921524J17Rik	ENSMUSG00000036934.10	protein_coding	chr8_86100000	2.7062	4.3969	0.5422	0.8528	0.7947	-0.0581	.
4921524L21Rik	ENSMUSG00000039540.10	protein_coding	chr18_6600000	0	0	0	0.7544	0.4779	-0.2765	.
4921525O09Rik	ENSMUSG00000113211.4	lncRNA	chr13_52250000	0.0189	0.0009	-0.0258	0.9251	0.8925	-0.0326	.
4921528I07Rik	ENSMUSG00000064299.8	lncRNA	chr9_114050000	0	0	0	0.5189	0.2086	-0.3102	.
4921529L05Rik	ENSMUSG00000108060.4	lncRNA	chr6_53950000	0	0.001	0.0015	0.7884	0.9155	0.1272	.
4921531C22Rik	ENSMUSG00000085704.4	lncRNA	chr2_179600000	0.9943	6.8883	1.9838	0.9231	0.6952	-0.2279	.
4921531P14Rik	ENSMUSG00000118333.3	lncRNA	chr18_83250000	0.0018	0	-0.0027	0.6959	0.472	-0.2239	.
4921533I20Rik	ENSMUSG00000121616.2	lncRNA	chr18_17400000	0	0	0	0.4857	0.1668	-0.3189	.
4921534H16Rik	ENSMUSG00000090255.9	lncRNA	chr9_97900000	0	0	0	0.7363	0.2163	-0.52	Bottom
4921536K21Rik	ENSMUSG00000020434.5	protein_coding	chr11_3800000	0.5995	1.0485	0.357	0.9501	0.9344	-0.0157	.
4921539E11Rik	ENSMUSG00000028520.13	protein_coding	chr4_103100000	0.0031	0	-0.0044	0.5934	0.4811	-0.1123	.
4921539H07Rik	ENSMUSG00000104586.3	lncRNA	chr3_58000000	0	0.0066	0.0095	0.5602	0.6926	0.1325	.
4922502N22Rik	ENSMUSG00000108128.3	lncRNA	chr6_139300000	0	0.0136	0.0195	0.271	0.1003	-0.1707	.
4930401A07Rik	ENSMUSG00000110794.3	lncRNA	chr10_92200000	0	0.0032	0.0046	0.4168	0.3699	-0.0469	.
4930401C15Rik	ENSMUSG00000112444.3	lncRNA	chr10_25650000	0.0029	0	-0.0041	0.6342	0.4933	-0.1409	.
4930401G09Rik	ENSMUSG00000086352.3	lncRNA	chr5_115500000	0.031	0.0268	-0.0059	0.9418	0.9766	0.0348	.
4930401O10Rik	ENSMUSG00000085528.3	lncRNA	chr11_71800000	0.0008	0.0063	0.008	0.7605	0.5735	-0.187	.
4930401O12Rik	ENSMUSG00000087460.4	lncRNA	chr13_31350000	0	0	0	0.6515	0.4871	-0.1644	.
4930402D18Rik	ENSMUSG00000115231.2	lncRNA	chr15_60800000	0	0	0	0.2874	0.4295	0.142	.
4930402F06Rik	ENSMUSG00000079421.9	protein_coding	chr2_35250000	0.0077	0	-0.0111	0.7866	0.9154	0.1288	.
4930402F11Rik	ENSMUSG00000108885.3	lncRNA	chr7_69200000	0.003	0	-0.0044	0.2743	0.1543	-0.1201	.
4930402K13Rik	ENSMUSG00000045797.2	protein_coding	chrX_8950000	0.4676	0	-0.5535	0.6111	0.442	-0.1691	.
4930403D09Rik	ENSMUSG00000087122.3	lncRNA	chr11_34150000	0	0	0	0.8448	0.3876	-0.4572	.
4930403O15Rik	ENSMUSG00000121740.2	lncRNA	chr10_20350000	0	0	0	0.7827	0.8215	0.0388	.
4930403P22Rik	ENSMUSG00000102762.3	lncRNA	chr1_36350000	0	0	0	0.7988	0.9454	0.1467	.
4930404A05Rik	ENSMUSG00000116611.3	lncRNA	chr16_52550000	0	0	0	0.1853	0.0639	-0.1214	.
4930404A12Rik	ENSMUSG00000106082.6	lncRNA	chr5_124750000	0.0482	0.0596	0.0156	0.9242	0.988	0.0638	.
4930404H24Rik	ENSMUSG00000079001.3	lncRNA	chr2_153300000	0.0153	0.0038	-0.0165	0.9571	0.8916	-0.0655	.
4930404I05Rik	ENSMUSG00000087354.4	lncRNA	chr16_90800000	0.0635	0.1386	0.0985	0.6722	0.8866	0.2144	.
4930404I20Rik	ENSMUSG00000107679.3	lncRNA	chr6_139550000	0	0	0	0.2489	0.1695	-0.0793	.
4930404K13Rik	ENSMUSG00000115639.3	lncRNA	chr14_120000000	0.0189	0	-0.0271	0.4787	0.223	-0.2556	.
4930404O17Rik	ENSMUSG00000115490.2	lncRNA	chr14_124950000	0	0	0	0.1679	0.04	-0.1278	.
4930405A10Rik	ENSMUSG00000114412.3	lncRNA	chr14_22550000	0	0	0	0.749	0.6928	-0.0562	.
4930405A21Rik	ENSMUSG00000086638.9	lncRNA	chr2_156550000	0.043	0.1405	0.129	0.9892	0.9278	-0.0614	.
4930405D01Rik	ENSMUSG00000116689.3	lncRNA	chr16_52800000	0.0012	0	-0.0017	0.3225	0.0552	-0.2673	.
4930405D11Rik	ENSMUSG00000085940.3	lncRNA	chr11_90700000	0	0	0	0.3055	0.2094	-0.0961	.
4930405H06Rik	ENSMUSG00000090146.3	lncRNA	chr5_99750000	0	0	0	0.6655	0.2904	-0.3751	.
4930405J17Rik	ENSMUSG00000110754.3	lncRNA	chr10_20050000	0	0	0	0.798	0.793	-0.005	.
4930405L22Rik	ENSMUSG00000106602.3	lncRNA	chr5_46050000	0	0	0	0.4523	0.2911	-0.1613	.
4930405N21Rik	ENSMUSG00000104705.4	lncRNA	chr5_113450000	0.6282	0.0012	-0.7016	0.9783	0.6609	-0.3174	.
4930405O22Rik	ENSMUSG00000090565.9	lncRNA	chr17_63600000	0.3681	0.0054	-0.4443	0.4922	0.5692	0.077	.
4930406D18Rik	ENSMUSG00000086923.3	lncRNA	chr3_100300000	0	0	0	0.6304	0.4089	-0.2215	.
4930407G08Rik	ENSMUSG00000086713.3	lncRNA	chr4_107800000	0	0.0031	0.0044	0.8956	0.9104	0.0149	.
4930407I10Rik	ENSMUSG00000075524.4	protein_coding	chr15_81950000	0	0.0056	0.008	0.971	0.9169	-0.0542	.
4930407I19Rik	ENSMUSG00000112210.3	lncRNA	chr10_65950000	0	0	0	0.2846	0.0884	-0.1961	.
4930408K08Rik	ENSMUSG00000105638.2	lncRNA	chr3_108950000	0	0	0	0.409	0.7251	0.316	Top
4930408O17Rik	ENSMUSG00000021101.4	lncRNA	chr12_104850000	0.0027	0	-0.0039	0.8926	0.6432	-0.2494	.
4930412B13Rik	ENSMUSG00000086221.2	lncRNA	chr2_117700000	0	0	0	0.3079	0.4886	0.1808	.
4930412C18Rik	ENSMUSG00000085558.10	lncRNA	chr4_9800000	0.0291	0.019	-0.0142	0.7648	0.5026	-0.2621	.
4930412E21Rik	ENSMUSG00000102203.3	lncRNA	chr3_23600000	0	0	0	0.2524	0.0261	-0.2262	.
4930412F09Rik	ENSMUSG00000085321.3	lncRNA	chr6_30900000	0	0	0	0.6867	0.9717	0.285	Top
4930412M03Rik	ENSMUSG00000051008.8	lncRNA	chr11_60000000	1.1341	0.0559	-1.0151	0.9847	0.9211	-0.0636	.
4930413E15Rik	ENSMUSG00000107144.3	lncRNA	chr5_119050000	0.0176	0	-0.0252	0.9907	0.3439	-0.6469	Bottom
4930413F20Rik	ENSMUSG00000115526.3	lncRNA	chr15_34650000	0	0.0489	0.0689	0.6481	0.4868	-0.1613	.
4930414F18Rik	ENSMUSG00000116520.3	lncRNA	chr16_12600000	0.0006	0	-0.0008	0.8481	0.5908	-0.2572	.
4930414N06Rik	ENSMUSG00000118204.3	lncRNA	chr19_44900000	0.0067	0	-0.0097	0.8178	0.8886	0.0707	.
4930415C11Rik	ENSMUSG00000114437.2	lncRNA	chr13_59200000	0	0	0	0.9097	0.6704	-0.2393	.
4930417H01Rik	ENSMUSG00000087017.9	lncRNA	chr2_122500000	0.0132	0.0143	0.0016	0.4606	0.7648	0.3042	Top
4930417O13Rik	ENSMUSG00000108129.5	lncRNA	chr6_125250000	0.0353	0.0075	-0.0394	0.8614	0.8957	0.0343	.
4930417O22Rik	ENSMUSG00000071818.11	lncRNA	chr11_101800000	0.0199	0	-0.0284	0.9881	0.9505	-0.0375	.
4930419G24Rik	ENSMUSG00000087625.3	lncRNA	chr3_33050000	0	0	0	0.7124	0.3135	-0.3989	.
4930420G21Rik	ENSMUSG00000116885.3	lncRNA	chr16_88200000	0	0	0	0.1936	0.0675	-0.1261	.
4930422C21Rik	ENSMUSG00000110476.3	lncRNA	chr8_116900000	0	0	0	0.6079	0.3864	-0.2215	.
4930422I22Rik	ENSMUSG00000112513.3	lncRNA	chr10_115650000	0	0	0	0.4589	0.2081	-0.2507	.
4930422M22Rik	ENSMUSG00000100281.3	lncRNA	chr9_99150000	0.0122	0.0015	-0.0153	0.6949	0.4414	-0.2535	.
4930423D22Rik	ENSMUSG00000113303.2	lncRNA	chr12_81800000	0.8791	0.0492	-0.8408	0.8742	0.833	-0.0413	.
4930423D24Rik	ENSMUSG00000112753.3	lncRNA	chr10_117000000	0.0436	0	-0.0616	0.757	0.6398	-0.1171	.
4930423K06Rik	ENSMUSG00000121083.2	lncRNA	chr15_89250000	2.4282	4.5126	0.6853	0.9103	0.8248	-0.0855	.
4930423M02Rik	ENSMUSG00000086066.9	lncRNA	chr4_5600000	0.016	0	-0.0229	0.5658	0.2323	-0.3335	.
4930425K10Rik	ENSMUSG00000106880.3	lncRNA	chr5_68050000	0.0174	0	-0.025	0.426	0.2554	-0.1706	.
4930425L21Rik	ENSMUSG00000107396.4	lncRNA	chr6_135650000	0	0.0003	0.0004	0.5941	0.2373	-0.3568	.
4930425O10Rik	ENSMUSG00000105838.3	lncRNA	chr3_138400000	0.0241	0.0015	-0.0321	0.4918	0.4929	0.0011	.
4930425P05Rik	ENSMUSG00000115120.3	lncRNA	chr14_31700000	0.0281	0	-0.04	0.8853	0.9201	0.0347	.
4930426D05Rik	ENSMUSG00000043168.14	lncRNA	chr18_21750000	0	0	0	0.6246	0.2785	-0.3461	.
4930426I24Rik	ENSMUSG00000097323.4	lncRNA	chr12_76450000	0.0153	0.364	0.426	0.8044	0.908	0.1036	.
4930426L09Rik	ENSMUSG00000026736.4	lncRNA	chr2_19000000	0.1377	1.8596	1.3297	0.6089	0.6102	0.0013	.
4930428D20Rik	ENSMUSG00000107073.3	lncRNA	chr16_69550000	0	0	0	0.173	0.0595	-0.1135	.
4930428E07Rik	ENSMUSG00000112967.3	lncRNA	chr12_38600000	0.0081	0	-0.0116	0.2662	0.4605	0.1944	.
4930428N03Rik	ENSMUSG00000089887.4	lncRNA	chr14_24800000	0.0032	0.0149	0.0167	0.9285	0.9965	0.0681	.
4930428O21Rik	ENSMUSG00000106333.2	lncRNA	chr5_107850000	0	0	0	0.8437	0.6334	-0.2103	.
4930429C20Rik	ENSMUSG00000115286.3	lncRNA	chr14_71650000	0	0	0	0.4653	0.3858	-0.0794	.
4930429D17Rik	ENSMUSG00000104956.3	lncRNA	chr5_103400000	0	0.0013	0.0019	0.5096	0.6181	0.1086	.
4930429F11Rik	ENSMUSG00000136793.1	lncRNA	chr17_79750000	0	0	0	0.6039	0.6399	0.036	.
4930429F24Rik	ENSMUSG00000086918.4	lncRNA	chr9_79700000	0.083	0.0571	-0.0349	0.4634	0.5002	0.0367	.
4930429H19Rik	ENSMUSG00000108530.3	lncRNA	chr7_72950000	0.0132	0.0196	0.009	0.7536	0.7788	0.0252	.
4930429P21Rik	ENSMUSG00000102144.3	lncRNA	chr9_107200000	0	0	0	0.9773	0.8285	-0.1488	.
4930430E12Rik	ENSMUSG00000085295.9	lncRNA	chr4_6350000	0.1031	0.0239	-0.1074	0.531	0.6134	0.0825	.
4930430F21Rik	ENSMUSG00000115474.3	lncRNA	chr15_31000000	0	0.0097	0.0139	0.6928	0.6304	-0.0624	.
4930430J02Rik	ENSMUSG00000140807.1	lncRNA	chr9_57250000	0.004	0	-0.0057	0.9514	0.8573	-0.0941	.
4930430O22Rik	ENSMUSG00000107353.2	lncRNA	chr5_115550000	0.2877	0	-0.3648	0.9922	0.9488	-0.0434	.
4930431F10Rik	ENSMUSG00000111494.3	lncRNA	chr10_44600000	0	0	0	0.5622	0.5316	-0.0306	.
4930431F12Rik	ENSMUSG00000062496.11	lncRNA	chr5_45100000	0	0	0	0.363	0.3443	-0.0186	.
4930431L21Rik	ENSMUSG00000105475.3	lncRNA	chr3_33950000	0	0	0	0.7474	0.5843	-0.1631	.
4930431P03Rik	ENSMUSG00000075042.12	lncRNA	chr14_45150000	0	0	0	0.6103	0.3229	-0.2874	.
4930431P19Rik	ENSMUSG00000121788.2	lncRNA	chr7_109350000	0.1095	2.0919	1.4786	0.7895	0.9347	0.1452	.
4930431P22Rik	ENSMUSG00000115709.3	lncRNA	chr14_76950000	0.0093	0.0007	-0.0123	0.8551	0.9388	0.0837	.
4930432B10Rik	ENSMUSG00000097007.5	lncRNA	chr10_11100000	0.0544	0.0034	-0.0715	0.5513	0.5143	-0.0369	.
4930432H08Rik	ENSMUSG00000106594.3	lncRNA	chr5_106450000	0	0	0	0.7114	0.1609	-0.5505	Bottom
4930432J09Rik	ENSMUSG00000115727.3	lncRNA	chr14_104250000	0	0.0169	0.0241	0.2684	0.3164	0.0481	.
4930432L08Rik	ENSMUSG00000087037.2	lncRNA	chr5_76450000	0.0175	0	-0.025	0.6136	0.7428	0.1292	.
4930432M17Rik	ENSMUSG00000074248.9	lncRNA	chr3_121450000	0	0	0	0.6965	0.818	0.1215	.
4930432O09Rik	ENSMUSG00000112846.3	lncRNA	chr10_120950000	0	0	0	0.7715	0.6	-0.1715	.
4930433B08Rik	ENSMUSG00000102699.3	lncRNA	chr3_18350000	0.0012	0	-0.0017	0.3718	0.2539	-0.1179	.
4930433E05Rik	ENSMUSG00000115720.3	lncRNA	chr14_93100000	0	0	0	0.0412	0.275	0.2338	.
4930433I11Rik	ENSMUSG00000091692.3	protein_coding	chr7_40600000	0	0	0	0.429	0.0697	-0.3593	.
4930433J02Rik	ENSMUSG00000103478.3	lncRNA	chr1_184800000	0.0781	0	-0.1085	0.7226	0.7784	0.0558	.
4930433N12Rik	ENSMUSG00000042360.14	lncRNA	chr9_3150000	0.0157	0.0017	-0.0201	0.549	0.1371	-0.4119	.
4930434B07Rik	ENSMUSG00000100850.3	lncRNA	chr1_90050000	0.0193	0.0287	0.0132	0.8893	0.9495	0.0602	.
4930434F21Rik	ENSMUSG00000111655.3	lncRNA	chr9_31350000	0	0	0	0.6561	0.5446	-0.1115	.
4930434J06Rik	ENSMUSG00000115304.3	lncRNA	chr14_72100000	0	0.0007	0.001	0.4688	0.1504	-0.3184	.
4930434J08Rik	ENSMUSG00000120343.2	lncRNA	chr11_20650000	0.3333	1.4071	0.8523	0.709	0.8671	0.158	.
4930434O05Rik	ENSMUSG00000107839.3	lncRNA	chr6_142900000	0	0	0	0.6247	0.6946	0.0698	.
4930435F18Rik	ENSMUSG00000114290.3	lncRNA	chr13_116900000	0	0	0	0.1387	0.3101	0.1715	.
4930435M08Rik	ENSMUSG00000115689.2	lncRNA	chr14_118250000	0	0	0	0.5836	0.5065	-0.0771	.
4930437M23Rik	ENSMUSG00000105688.3	lncRNA	chr5_11500000	0	0	0	0.4073	0.0002	-0.4071	.
4930438A08Rik	ENSMUSG00000069873.5	protein_coding	chr11_58150000	0.0096	0	-0.0137	0.8482	0.5714	-0.2767	.
4930438E09Rik	ENSMUSG00000093472.3	lncRNA	chr14_67600000	0	0	0	0.8022	0.6718	-0.1304	.
4930439A04Rik	ENSMUSG00000086064.3	lncRNA	chr1_37350000	0.0365	0	-0.0517	0.9577	0.8309	-0.1267	.
4930439D14Rik	ENSMUSG00000101905.3	lncRNA	chr1_156750000	0.0546	0.1391	0.1111	0.6336	0.8526	0.2191	.
4930440C22Rik	ENSMUSG00000100518.3	lncRNA	chr1_94700000	0	0	0	0.143	0.061	-0.082	.
4930441H08Rik	ENSMUSG00000108669.3	lncRNA	chr7_71600000	0	0	0	0.4455	0.3919	-0.0536	.
4930441J16Rik	ENSMUSG00000085405.3	lncRNA	chr2_74100000	0	0	0	0.7577	0.6886	-0.0691	.
4930442G10Rik	ENSMUSG00000113974.3	lncRNA	chr12_74850000	0	0.1688	0.225	0.3567	0.6343	0.2775	Top
4930442G15Rik	ENSMUSG00000111629.3	lncRNA	chr9_56800000	0	0	0	0.9932	0.9614	-0.0318	.
4930442L01Rik	ENSMUSG00000087223.4	lncRNA	chr3_96700000	0.068	0	-0.0949	0.8134	0.7374	-0.076	.
4930443O20Rik	ENSMUSG00000086969.3	lncRNA	chr2_84900000	0	0	0	0.5267	0.4613	-0.0654	.
4930444A19Rik	ENSMUSG00000101674.8	lncRNA	chr1_54750000	0	0	0	0.6469	0.7473	0.1004	.
4930444E06Rik	ENSMUSG00000085127.2	lncRNA	chr2_144050000	0	0	0	0.7346	0.7403	0.0057	.
4930444F02Rik	ENSMUSG00000110737.4	lncRNA	chr10_18650000	0	0.003	0.0043	0.7448	0.4617	-0.2832	.
4930444M15Rik	ENSMUSG00000120444.2	lncRNA	chr14_76750000	11.532	0.0037	-3.6423	0.9347	0.937	0.0023	.
4930444P10Rik	ENSMUSG00000067795.14	protein_coding	chr1_16100000	0.0244	0.1073	0.1123	0.5327	0.3889	-0.1439	.
4930445B16Rik	ENSMUSG00000091061.2	lncRNA	chr2_96900000	0	0.0005	0.0007	0.0584	0.1566	0.0981	.
4930445E18Rik	ENSMUSG00000115355.3	lncRNA	chr15_25250000	0.0828	0.0164	-0.0914	0.627	0.514	-0.113	.
4930445N06Rik	ENSMUSG00000115880.3	lncRNA	chr15_88100000	0	0	0	0.7813	0.3079	-0.4734	Bottom
4930445N08Rik	ENSMUSG00000087205.3	lncRNA	chr2_74400000	0.0567	0.0066	-0.07	0.6383	0.6706	0.0324	.
4930445N18Rik	ENSMUSG00000097738.4	lncRNA	chr18_82850000	0.119	0.0172	-0.1376	0.8123	0.8324	0.0201	.
4930447A16Rik	ENSMUSG00000022288.3	lncRNA	chr15_37400000	0	0.0043	0.0062	0.904	0.8752	-0.0287	.
4930447C04Rik	ENSMUSG00000021098.16	protein_coding	chr12_72950000	0.6559	0.0041	-0.7216	0.5964	0.8373	0.2409	.
4930447F04Rik	ENSMUSG00000031182.3	protein_coding	chrX_65300000	0	0	0	0.1968	0.0423	-0.1546	.
4930447F24Rik	ENSMUSG00000102224.7	lncRNA	chr9_108000000	0.7637	0.0134	-0.7994	0.933	0.9443	0.0114	.
4930447J18Rik	ENSMUSG00000115609.3	lncRNA	chr14_48150000	0.0041	0.0014	-0.0039	0.8732	0.7577	-0.1155	.
4930447K03Rik	ENSMUSG00000113591.3	lncRNA	chr13_34250000	0.072	0.0673	-0.0064	0.7498	0.9122	0.1623	.
4930447M23Rik	ENSMUSG00000087674.10	lncRNA	chr2_19300000	0.0102	0.0181	0.0112	0.7198	0.5313	-0.1885	.
4930447N08Rik	ENSMUSG00000106583.3	lncRNA	chr3_122550000	0	0	0	0.5311	0.6538	0.1227	.
4930448A20Rik	ENSMUSG00000108382.3	lncRNA	chr7_126300000	0.0946	0	-0.1305	0.8965	0.8765	-0.02	.
4930448C13Rik	ENSMUSG00000113644.3	lncRNA	chr12_15000000	0	0.0004	0.0006	0.4809	0.1755	-0.3054	.
4930448D08Rik	ENSMUSG00000086824.3	lncRNA	chr18_70100000	0	0	0	0.2231	0.4859	0.2628	Top
4930448E22Rik	ENSMUSG00000097463.4	lncRNA	chr9_46200000	1.2423	0.0054	-1.1573	0.9762	0.9023	-0.074	.
4930448F12Rik	ENSMUSG00000113470.3	lncRNA	chr13_18250000	0.0109	0	-0.0156	0.5643	0.2569	-0.3074	.
4930448H16Rik	ENSMUSG00000089879.3	lncRNA	chr5_143200000	0	0	0	0.9421	0.8114	-0.1307	.
4930448I06Rik	ENSMUSG00000104072.3	lncRNA	chr1_41200000	0	0	0	0.4759	0.5173	0.0414	.
4930448I18Rik	ENSMUSG00000104870.3	lncRNA	chr5_50350000	0	0	0	0.3543	0.2689	-0.0855	.
4930448K20Rik	ENSMUSG00000121765.2	lncRNA	chr4_9900000	0	0	0	0.5222	0.2654	-0.2568	.
4930449C09Rik	ENSMUSG00000115676.3	lncRNA	chr15_63550000	0	0	0	0.5641	0.7741	0.21	.
4930449E01Rik	ENSMUSG00000022116.9	lncRNA	chr14_105700000	0.0269	0.0094	-0.0248	0.4204	0.6611	0.2407	.
4930449E18Rik	ENSMUSG00000117684.3	lncRNA	chr19_57250000	0	0	0	0.8423	0.7897	-0.0526	.
4930449I24Rik	ENSMUSG00000079093.3	protein_coding	chr5_146400000	0	0	0	0.6047	0.4563	-0.1485	.
4930451E10Rik	ENSMUSG00000069223.12	lncRNA	chr13_55900000	0.0198	0	-0.0283	0.9794	0.7034	-0.276	.
4930451I11Rik	ENSMUSG00000045989.5	protein_coding	chr7_126400000	0	0	0	0.9797	0.9544	-0.0253	.
4930452A19Rik	ENSMUSG00000117264.3	lncRNA	chr17_9950000	0	0.0635	0.0888	0.8764	0.8772	0.0008	.
4930452G13Rik	ENSMUSG00000115422.3	lncRNA	chr14_80000000	0.0071	0	-0.0102	0.7383	0.496	-0.2424	.
4930452L12Rik	ENSMUSG00000112175.3	lncRNA	chr10_56300000	0	0	0	0.4353	0.3043	-0.1309	.
4930452N14Rik	ENSMUSG00000099933.3	lncRNA	chr1_154100000	0	0	0	0.6121	0.4279	-0.1842	.
4930453C13Rik	ENSMUSG00000113987.3	lncRNA	chr13_46050000	0	0	0	0.9342	0.9115	-0.0228	.
4930453H23Rik	ENSMUSG00000087358.11	lncRNA	chrX_21050000	0.0344	0	-0.0488	0.5365	0.2569	-0.2796	.
4930453L07Rik	ENSMUSG00000109215.3	lncRNA	chr8_9200000	0	0	0	0.7232	0.3118	-0.4114	.
4930453N24Rik	ENSMUSG00000059920.10	protein_coding	chr16_64550000	19.1643	7.8946	-1.1808	0.5015	0.4793	-0.0222	.
4930455B14Rik	ENSMUSG00000097898.10	lncRNA	chr14_13750000	0.0709	0	-0.0989	0.4327	0.2325	-0.2001	.
4930455C13Rik	ENSMUSG00000112654.3	lncRNA	chr10_21200000	0	0.0043	0.0062	0.9326	0.8322	-0.1004	.
4930455F16Rik	ENSMUSG00000136393.1	lncRNA	chr16_4000000	0	0	0	0.9179	0.9228	0.0049	.
4930455G09Rik	ENSMUSG00000085761.4	lncRNA	chr4_141750000	0	0	0	0.8615	0.6023	-0.2592	.
4930455H04Rik	ENSMUSG00000080907.2	protein_coding	chr3_116750000	0	0	0	0.4773	0.4324	-0.0449	.
4930455J16Rik	ENSMUSG00000114384.3	lncRNA	chr13_58850000	0	0	0	0.9402	0.509	-0.4311	.
4930455M05Rik	ENSMUSG00000114787.2	lncRNA	chr13_59550000	0	0	0	0.926	0.7417	-0.1843	.
4930456L15Rik	ENSMUSG00000078618.5	lncRNA	chr4_103100000	0	0.0011	0.0016	0.5934	0.4811	-0.1123	.
4930458A03Rik	ENSMUSG00000105531.3	lncRNA	chr5_106450000	0.0128	0	-0.0184	0.7114	0.1609	-0.5505	Bottom
4930458B22Rik	ENSMUSG00000109861.3	lncRNA	chr7_106350000	0	0	0	0.1844	0.0109	-0.1735	.
4930458D05Rik	ENSMUSG00000087611.4	lncRNA	chr5_100950000	0.1123	0.012	-0.1363	0.6863	0.6713	-0.0149	.
4930458K08Rik	ENSMUSG00000111903.3	lncRNA	chr12_77700000	0.0583	0	-0.0817	0.6643	0.778	0.1137	.
4930459C07Rik	ENSMUSG00000112762.3	lncRNA	chr10_96000000	0	0.0003	0.0004	0.4599	0.5368	0.0769	.
4930459L07Rik	ENSMUSG00000105234.3	lncRNA	chr5_58600000	0	0	0	0.1546	0.1575	0.0029	.
4930461C15Rik	ENSMUSG00000086827.4	lncRNA	chr16_58200000	0.1455	0.0594	-0.1126	0.4486	0.5367	0.0881	.
4930461G14Rik	ENSMUSG00000097651.5	lncRNA	chr9_58350000	1.8284	0.0015	-1.4979	0.9944	0.959	-0.0355	.
4930463O16Rik	ENSMUSG00000020033.4	lncRNA	chr10_84300000	0.0173	0	-0.0248	0.7955	0.8791	0.0836	.
4930465I24Rik	ENSMUSG00000109986.3	lncRNA	chr8_11700000	0.0538	0	-0.0757	0.9294	0.8221	-0.1073	.
4930465K09Rik	ENSMUSG00000115063.3	lncRNA	chr15_32600000	0	0	0	0.4994	0.6025	0.1031	.
4930465M20Rik	ENSMUSG00000085641.3	lncRNA	chr12_107700000	0.0045	0	-0.0064	0.8599	0.4937	-0.3662	.
4930466I24Rik	ENSMUSG00000087317.2	lncRNA	chr6_91950000	0	0	0	0.9885	0.9001	-0.0884	.
4930467D21Rik	ENSMUSG00000097516.9	lncRNA	chr5_97500000	0.0274	0	-0.0389	0.43	0.1583	-0.2717	.
4930467J12Rik	ENSMUSG00000114879.3	lncRNA	chr13_114700000	0	0	0	0.4624	0.3828	-0.0796	.
4930467K11Rik	ENSMUSG00000097370.4	lncRNA	chr10_57350000	0.0207	0.0651	0.0614	0.414	0.5267	0.1127	.
4930469B13Rik	ENSMUSG00000068776.8	lncRNA	chr14_19650000	0	0	0	0.5826	0.3718	-0.2108	.
4930469K13Rik	ENSMUSG00000085684.4	protein_coding	chr11_33950000	0.0013	0.0005	-0.0011	0.8187	0.4483	-0.3704	.
4930470G03Rik	ENSMUSG00000085788.2	lncRNA	chr13_21600000	0	0.1003	0.1379	0.7738	0.5461	-0.2278	.
4930470H14Rik	ENSMUSG00000116975.3	lncRNA	chr17_4050000	0	0	0	0.6192	0.3501	-0.2691	.
4930470O06Rik	ENSMUSG00000110406.3	lncRNA	chr8_60300000	0	0	0	0.0549	0.0182	-0.0367	.
4930470P17Rik	ENSMUSG00000043583.3	lncRNA	chr2_170400000	0.0046	0	-0.0067	0.8578	0.4798	-0.378	.
4930471C04Rik	ENSMUSG00000091686.3	lncRNA	chr14_64300000	0	0.0119	0.0171	0.9843	0.8852	-0.0991	.
4930471D02Rik	ENSMUSG00000097689.3	lncRNA	chr10_93750000	0	0	0	0.6806	0.8431	0.1625	.
4930471E15Rik	ENSMUSG00000113228.3	lncRNA	chr12_65200000	0	0	0	0.3928	0.4534	0.0607	.
4930471E19Rik	ENSMUSG00000112716.3	lncRNA	chr10_120550000	0.0105	0.0007	-0.014	0.7585	0.8378	0.0793	.
4930471G03Rik	ENSMUSG00000117852.3	lncRNA	chr18_36200000	0	0	0	0.9168	0.9245	0.0076	.
4930471G24Rik	ENSMUSG00000114509.3	lncRNA	chr13_47800000	0.0178	0.0023	-0.0222	0.7063	0.5202	-0.1861	.
4930471L23Rik	ENSMUSG00000117137.3	lncRNA	chr17_71600000	0	0	0	0.7863	0.5953	-0.191	.
4930471M09Rik	ENSMUSG00000121651.2	lncRNA	chr6_91400000	0.0618	0.0234	-0.0531	0.8633	0.9575	0.0941	.
4930473A02Rik	ENSMUSG00000060029.16	lncRNA	chr2_130350000	0.0187	0.0858	0.0921	0.8815	0.9476	0.0661	.
4930473D10Rik	ENSMUSG00000089934.3	lncRNA	chr10_114600000	0	0	0	0.2801	0.0675	-0.2126	.
4930473H19Rik	ENSMUSG00000113087.3	lncRNA	chr12_88400000	0	0	0	0.4997	0.5085	0.0087	.
4930473O22Rik	ENSMUSG00000112484.3	lncRNA	chr10_97450000	0	0	0	0.0749	0.2681	0.1932	.
4930474H06Rik	ENSMUSG00000087109.3	lncRNA	chr12_71350000	0.041	0	-0.0579	0.8289	0.9352	0.1063	.
4930474H20Rik	ENSMUSG00000115001.3	lncRNA	chr14_90450000	0	0	0	0.1662	0.0627	-0.1034	.
4930474M22Rik	ENSMUSG00000117328.3	lncRNA	chr17_14600000	0	0	0	0.8708	0.7048	-0.166	.
4930474N05Rik	ENSMUSG00000096405.4	protein_coding	chr14_35800000	0.0641	0	-0.0896	0.4351	0.1394	-0.2956	.
4930474N09Rik	ENSMUSG00000113210.3	lncRNA	chr12_99100000	0	0.0177	0.0253	0.7464	0.7741	0.0276	.
4930477E14Rik	ENSMUSG00000097539.3	lncRNA	chr3_96300000	0.0463	0	-0.0653	0.8629	0.905	0.0421	.
4930477G07Rik	ENSMUSG00000113268.3	lncRNA	chr12_100050000	0	0	0	0.7773	0.9139	0.1366	.
4930477N07Rik	ENSMUSG00000112155.3	lncRNA	chr10_119200000	0.0014	0.0007	-0.001	0.6839	0.3599	-0.3241	.
4930478E11Rik	ENSMUSG00000115245.3	lncRNA	chr15_54800000	0	0	0	0.5993	0.4851	-0.1142	.
4930478K11Rik	ENSMUSG00000097847.3	lncRNA	chr12_108250000	0	0	0	0.9131	0.9098	-0.0033	.
4930478L05Rik	ENSMUSG00000116628.2	lncRNA	chr16_78350000	0.155	0	-0.2079	0.5167	0.5506	0.0339	.
4930478M13Rik	ENSMUSG00000116311.3	lncRNA	chr15_100000000	0	0.0057	0.0082	0.9186	0.9279	0.0092	.
4930478P22Rik	ENSMUSG00000106762.5	lncRNA	chr5_35500000	0	0	0	0.9774	0.8993	-0.0781	.
4930479D17Rik	ENSMUSG00000085238.3	lncRNA	chr6_146550000	0.1058	0.2021	0.1205	0.6695	0.6107	-0.0588	.
4930479H17Rik	ENSMUSG00000109049.3	lncRNA	chr7_30050000	0	0.0041	0.0059	0.9329	0.7659	-0.1669	.
4930480E11Rik	ENSMUSG00000035651.8	protein_coding	chrX_77400000	0	0	0	0.2223	0.2869	0.0646	.
4930480K15Rik	ENSMUSG00000090160.3	lncRNA	chr17_91150000	0	0	0	0.1633	0.527	0.3637	Top
4930480M12Rik	ENSMUSG00000113115.3	lncRNA	chr12_26250000	0	0	0	0.705	0.7424	0.0375	.
4930481A15Rik	ENSMUSG00000086938.12	lncRNA	chr19_5450000	0.0335	0.9483	0.9147	0.9989	0.9757	-0.0232	.
4930481B07Rik	ENSMUSG00000085956.4	lncRNA	chr3_94900000	1.0663	0.367	-0.5961	0.8344	0.9362	0.1018	.
4930483J18Rik	ENSMUSG00000047938.9	lncRNA	chr15_81050000	0.1994	0.1398	-0.0735	0.9158	0.8779	-0.0379	.
4930483O08Rik	ENSMUSG00000109816.3	lncRNA	chr7_132700000	0.0131	0.0104	-0.0039	0.8264	0.7992	-0.0272	.
4930483P17Rik	ENSMUSG00000116772.4	lncRNA	chr16_18000000	0	0.0829	0.1149	0.9939	0.9755	-0.0184	.
4930484H19Rik	ENSMUSG00000112832.3	lncRNA	chr10_126600000	0.0053	0.0113	0.0086	0.6467	0.4127	-0.2339	.
4930484I04Rik	ENSMUSG00000117981.3	lncRNA	chr19_53950000	0	0	0	0.5444	0.66	0.1156	.
4930486F22Rik	ENSMUSG00000112493.3	lncRNA	chr10_85950000	0	0	0	0.7571	0.6096	-0.1475	.
4930486I03Rik	ENSMUSG00000089914.4	lncRNA	chr1_20400000	0	0	0	0.4442	0.1286	-0.3157	.
4930486L24Rik	ENSMUSG00000050345.10	protein_coding	chr13_61000000	0	0	0	0.5293	0.2473	-0.282	.
4930487D11Rik	ENSMUSG00000106932.3	lncRNA	chr5_38500000	0	0	0	0.8424	0.5413	-0.3011	.
4930488B22Rik	ENSMUSG00000092578.3	lncRNA	chr1_184450000	0.0511	0	-0.0719	0.6618	0.8442	0.1823	.
4930488L21Rik	ENSMUSG00000097520.5	lncRNA	chr8_94450000	0.0009	0.0075	0.0095	0.6394	0.4408	-0.1986	.
4930488N15Rik	ENSMUSG00000110592.3	lncRNA	chr8_116300000	0	0	0	0.6096	0.4738	-0.1358	.
4930500A05Rik	ENSMUSG00000117391.3	lncRNA	chr17_84800000	0.0069	0	-0.0099	0.7394	0.8615	0.1221	.
4930500F04Rik	ENSMUSG00000107214.5	lncRNA	chr5_149800000	0.0053	0	-0.0076	0.7466	0.409	-0.3376	.
4930500F10Rik	ENSMUSG00000097592.4	lncRNA	chr9_106150000	0.1415	0.0152	-0.1691	0.9825	0.8915	-0.0911	.
4930500G05Rik	ENSMUSG00000120303.2	lncRNA	chrX_12800000	0.0067	0.0039	-0.0041	0.7335	0.9056	0.1721	.
4930500H12Rik	ENSMUSG00000116976.3	lncRNA	chr16_72900000	0.0037	0	-0.0053	0.3132	0.1503	-0.1628	.
4930500L23Rik	ENSMUSG00000106056.3	lncRNA	chr5_139550000	0.0053	0.0002	-0.0073	0.9852	0.8506	-0.1346	.
4930500M09Rik	ENSMUSG00000044306.5	lncRNA	chr1_170000000	0	0.1621	0.2168	0.6309	0.6896	0.0586	.
4930502A04Rik	ENSMUSG00000111303.3	lncRNA	chr9_68450000	0	0.0534	0.0751	0.6303	0.6989	0.0686	.
4930502E09Rik	ENSMUSG00000086799.3	lncRNA	chr11_84700000	0.0345	0.0028	-0.045	0.8513	0.8764	0.0251	.
4930503B20Rik	ENSMUSG00000090202.2	protein_coding	chr3_146350000	0.112	0	-0.1532	0.6231	0.6887	0.0656	.
4930503E14Rik	ENSMUSG00000072595.4	protein_coding	chr14_44400000	0.01	0	-0.0143	0.4444	0.0427	-0.4018	.
4930503E24Rik	ENSMUSG00000121661.2	lncRNA	chr10_124350000	0	0	0	0.1531	0.0735	-0.0796	.
4930503F20Rik	ENSMUSG00000115751.3	lncRNA	chr14_33450000	0	0	0	0.747	0.4416	-0.3053	.
4930503L19Rik	ENSMUSG00000044906.7	protein_coding	chr18_70550000	4.9461	3.9783	-0.2563	0.3791	0.5268	0.1477	.
4930503O07Rik	ENSMUSG00000103692.3	lncRNA	chr1_193850000	0	0.0002	0.0003	0.0878	0.3452	0.2574	Top
4930504C09Rik	ENSMUSG00000116167.2	lncRNA	chr15_69100000	0	0	0	0.3647	0.3096	-0.0551	.
4930504D19Rik	ENSMUSG00000107926.3	lncRNA	chr6_84500000	0	0	0	0.9248	0.7348	-0.19	.
4930505A04Rik	ENSMUSG00000040919.14	protein_coding	chr11_30400000	0.0081	0.0066	-0.0022	0.6408	0.4981	-0.1427	.
4930505G20Rik	ENSMUSG00000093551.3	lncRNA	chr14_115550000	0	0	0	0.3773	0.1472	-0.2301	.
4930505K13Rik	ENSMUSG00000109414.3	lncRNA	chr7_119750000	0	0	0	0.5734	0.2681	-0.3053	.
4930505K14Rik	ENSMUSG00000085740.3	lncRNA	chr5_148700000	0	0	0	0.8564	0.6369	-0.2196	.
4930505M18Rik	ENSMUSG00000093540.4	lncRNA	chr7_37350000	0.0581	0	-0.0815	0.8044	0.4115	-0.3929	.
4930505N22Rik	ENSMUSG00000097690.4	lncRNA	chr19_45950000	0.0218	0.0505	0.04	0.9142	0.9398	0.0256	.
4930505O20Rik	ENSMUSG00000086912.5	lncRNA	chr8_81200000	0.0704	0	-0.0982	0.5268	0.4371	-0.0897	.
4930506A18Rik	ENSMUSG00000129455.1	lncRNA	chr8_107000000	0.0031	0.0015	-0.0023	0.9308	0.8112	-0.1196	.
4930506C21Rik	ENSMUSG00000087478.4	lncRNA	chr17_8500000	0.0092	0.3255	0.3934	0.8641	0.8988	0.0347	.
4930507D05Rik	ENSMUSG00000097129.3	lncRNA	chr10_62250000	1.1676	2.912	0.8518	0.8373	0.8975	0.0603	.
4930507D10Rik	ENSMUSG00000086703.3	lncRNA	chr11_80700000	0	0	0	0.8228	0.5644	-0.2584	.
4930509E16Rik	ENSMUSG00000096986.4	lncRNA	chr9_72400000	0.0474	0.0727	0.0344	0.7026	0.9755	0.2729	Top
4930509G22Rik	ENSMUSG00000096959.3	lncRNA	chr16_10950000	0.0775	0.1746	0.1244	0.7574	0.9235	0.1661	.
4930509H03Rik	ENSMUSG00000105659.2	lncRNA	chr3_104400000	2.3468	0.0784	-1.6339	0.6843	0.8715	0.1873	.
4930509J09Rik	ENSMUSG00000102362.3	lncRNA	chr3_73350000	0	0.0002	0.0003	0.2233	0.106	-0.1173	.
4930509K18Rik	ENSMUSG00000087137.2	lncRNA	chr4_40300000	0	0	0	0.652	0.4493	-0.2027	.
4930510E17Rik	ENSMUSG00000032048.5	lncRNA	chr9_53150000	0	0	0	0.7021	0.5852	-0.117	.
4930511A02Rik	ENSMUSG00000097841.4	lncRNA	chr12_11450000	0.0251	0	-0.0358	0.5684	0.3212	-0.2472	.
4930511E03Rik	ENSMUSG00000108187.3	lncRNA	chr6_94850000	0.0107	0.004	-0.0097	0.7243	0.8906	0.1663	.
4930511J24Rik	ENSMUSG00000112940.3	lncRNA	chr12_109850000	0.2471	0	-0.3186	0.9366	0.248	-0.6885	Bottom
4930511M06Rik	ENSMUSG00000086607.9	lncRNA	chr18_57600000	0.0039	0.0001	-0.0055	0.5558	0.8857	0.3299	Top
4930511M18Rik	ENSMUSG00000104791.2	lncRNA	chr3_92050000	0	0.001	0.0015	0.4141	0.1789	-0.2352	.
4930511O05Rik	ENSMUSG00000086698.3	lncRNA	chr13_27450000	0	0.0018	0.0026	0.4297	0.4228	-0.0068	.
4930511P09Rik	ENSMUSG00000122432.1	lncRNA	chr18_56550000	0	0.141	0.1903	0.6003	0.911	0.3107	Top
4930512B01Rik	ENSMUSG00000020992.7	lncRNA	chr12_69800000	0.0035	0	-0.0051	0.7333	0.9409	0.2076	.
4930512H18Rik	ENSMUSG00000086866.4	lncRNA	chr8_62350000	0	0.0006	0.0008	0.4896	0.4345	-0.0551	.
4930512J16Rik	ENSMUSG00000107622.3	lncRNA	chr6_89200000	0.1029	0	-0.1412	0.9049	0.6695	-0.2354	.
4930512M02Rik	ENSMUSG00000062511.7	protein_coding	chr11_11550000	0	0	0	0.3367	0.1318	-0.2049	.
4930512P04Rik	ENSMUSG00000106125.2	lncRNA	chr3_116450000	0	0	0	0.568	0.748	0.1799	.
4930513D17Rik	ENSMUSG00000106741.5	lncRNA	chr5_39750000	0	0.0002	0.0002	0.4871	0.3255	-0.1617	.
4930513L16Rik	ENSMUSG00000116491.3	lncRNA	chr15_84800000	0	0	0	0.9034	0.8699	-0.0335	.
4930513N10Rik	ENSMUSG00000074136.11	lncRNA	chr8_96500000	1.0004	0.5609	-0.3579	0.6277	0.8143	0.1866	.
4930513O06Rik	ENSMUSG00000031270.3	lncRNA	chrX_137950000	0	0.0014	0.0021	0.211	0.2959	0.0849	.
4930515B02Rik	ENSMUSG00000087045.3	lncRNA	chr4_140550000	0.0679	0	-0.0948	0.9942	0.9	-0.0942	.
4930515G01Rik	ENSMUSG00000092183.3	lncRNA	chr5_114900000	2.9184	5.2093	0.6642	0.9764	0.9844	0.008	.
4930515L03Rik	ENSMUSG00000136821.1	lncRNA	chr2_17000000	0	0	0	0.3693	0.1252	-0.2441	.
4930515L19Rik	ENSMUSG00000085157.3	lncRNA	chrX_45400000	0	0	0	0.3622	0.1767	-0.1856	.
4930516B21Rik	ENSMUSG00000097504.3	lncRNA	chr9_119250000	0	0.0157	0.0225	0.9647	0.7924	-0.1723	.
4930516K23Rik	ENSMUSG00000109824.5	protein_coding	chr7_103750000	0	0	0	0.4093	0.1084	-0.3009	.
4930517E11Rik	ENSMUSG00000085496.2	lncRNA	chr2_123950000	0	0	0	0.3642	0.6759	0.3117	Top
4930517E14Rik	ENSMUSG00000111246.2	lncRNA	chr9_31150000	1.5574	0.2769	-1.0021	0.7445	0.7131	-0.0314	.
4930517G24Rik	ENSMUSG00000120083.2	lncRNA	chr8_107950000	0.005	0.0004	-0.0067	0.9042	0.8144	-0.0899	.
4930517L18Rik	ENSMUSG00000104225.3	lncRNA	chr18_37750000	12.2403	0	-3.7269	0.6427	0.5424	-0.1002	.
4930517M08Rik	ENSMUSG00000116767.3	lncRNA	chr17_4650000	0	0	0	0.706	0.4581	-0.2479	.
4930517N10Rik	ENSMUSG00000118396.4	lncRNA	chr9_106400000	0.004	0	-0.0058	0.8739	0.5339	-0.34	.
4930517O19Rik	ENSMUSG00000054391.14	lncRNA	chr14_100450000	0	0	0	0.5179	0.6664	0.1485	.
4930518C09Rik	ENSMUSG00000092309.4	lncRNA	chr5_48100000	0	0	0	0.4517	0.2831	-0.1685	.
4930518I17Rik	ENSMUSG00000107924.2	lncRNA	chr15_32200000	0	0	0	0.5667	0.5527	-0.014	.
4930518J20Rik	ENSMUSG00000103705.2	lncRNA	chr1_156100000	0	0.0557	0.0782	0.6329	0.6697	0.0368	.
4930518J21Rik	ENSMUSG00000110310.3	lncRNA	chr8_56900000	0.0056	0.0032	-0.0035	0.3292	0.1581	-0.171	.
4930518P08Rik	ENSMUSG00000113652.3	lncRNA	chr13_50900000	0	0	0	0.6585	0.4172	-0.2413	.
4930519A11Rik	ENSMUSG00000097627.4	lncRNA	chr12_12950000	0.3341	0.0139	-0.3959	0.8059	0.7055	-0.1004	.
4930519D14Rik	ENSMUSG00000086263.3	lncRNA	chr13_30750000	0	0	0	0.7136	0.5486	-0.165	.
4930519F24Rik	ENSMUSG00000101584.4	lncRNA	chr9_99900000	0	0	0	0.5857	0.142	-0.4437	.
4930519G04Rik	ENSMUSG00000029564.13	protein_coding	chr5_114950000	0.0062	0	-0.0089	0.9808	0.9307	-0.0501	.
4930519H02Rik	ENSMUSG00000105185.6	lncRNA	chr5_16050000	0	0	0	0.3721	0.3765	0.0043	.
4930519K11Rik	ENSMUSG00000114953.3	lncRNA	chr14_24050000	0	0.0829	0.1149	0.9486	0.819	-0.1296	.
4930519L02Rik	ENSMUSG00000105652.4	lncRNA	chr3_142750000	0	0	0	0.2557	0.4144	0.1587	.
4930519P11Rik	ENSMUSG00000097602.4	lncRNA	chr2_154450000	1.8025	1.1655	-0.372	0.9107	0.8809	-0.0298	.
4930520K02Rik	ENSMUSG00000112868.3	lncRNA	chr10_23400000	0.004	0	-0.0057	0.6941	0.4462	-0.2479	.
4930520M14Rik	ENSMUSG00000106127.3	lncRNA	chr5_139200000	0	0	0	0.9574	0.8826	-0.0748	.
4930520O04Rik	ENSMUSG00000074039.12	lncRNA	chr9_114150000	0.4503	0.1671	-0.3135	0.619	0.444	-0.175	.
4930520P13Rik	ENSMUSG00000113463.3	lncRNA	chr13_70350000	0.0056	0	-0.008	0.6607	0.3172	-0.3435	.
4930521E06Rik	ENSMUSG00000101701.2	lncRNA	chr1_44750000	0.0316	0	-0.0449	0.4447	0.4087	-0.036	.
4930521O11Rik	ENSMUSG00000071591.5	lncRNA	chr14_15050000	0	0	0	0.7872	0.1996	-0.5876	Bottom
4930521O17Rik	ENSMUSG00000112899.2	lncRNA	chr10_67800000	0	0	0	0.6277	0.7525	0.1248	.
4930522H14Rik	ENSMUSG00000060491.15	protein_coding	chr4_109350000	0	0	0	0.5457	0.4931	-0.0526	.
4930522L14Rik	ENSMUSG00000072762.10	protein_coding	chr5_109850000	2.7938	1.229	-0.7672	0.5673	0.3053	-0.262	.
4930522L14Rik	ENSMUSG00000121595.1	lncRNA	chr5_109850000	0	0.01	0.0143	0.5673	0.3053	-0.262	.
4930522O17Rik	ENSMUSG00000086947.4	lncRNA	chr4_53200000	0	0.0059	0.0085	0.6769	0.7838	0.1069	.
4930523C07Rik	ENSMUSG00000090394.9	protein_coding	chr1_159900000	0.0052	0.1308	0.1698	0.5447	0.6026	0.0579	.
4930523O13Rik	ENSMUSG00000115177.3	lncRNA	chr15_46300000	0	0	0	0.2131	0.0547	-0.1584	.
4930524B15Rik	ENSMUSG00000020299.7	protein_coding	chr11_31900000	0.2615	0.0046	-0.3285	0.7735	0.863	0.0895	.
4930524B17Rik	ENSMUSG00000107217.3	lncRNA	chr6_19200000	0	0	0	0.3758	0.1135	-0.2624	.
4930524C18Rik	ENSMUSG00000115320.3	lncRNA	chr14_115050000	0	0	0	0.3182	0.1547	-0.1635	.
4930524O05Rik	ENSMUSG00000118392.3	lncRNA	chr19_10600000	0	0	0	0.965	0.8847	-0.0803	.
4930524O07Rik	ENSMUSG00000090207.4	lncRNA	chr9_106750000	0.9735	0.4791	-0.416	0.9853	0.7964	-0.189	.
4930524O08Rik	ENSMUSG00000098627.9	lncRNA	chr9_89700000	0.0049	0	-0.007	0.6386	0.3987	-0.2398	.
4930525C09Rik	ENSMUSG00000112497.3	lncRNA	chr10_97500000	0	0	0	0.0116	0.3222	0.3106	Top
4930525G20Rik	ENSMUSG00000097276.4	lncRNA	chr13_67950000	0.0304	0.0025	-0.0395	0.5897	0.3715	-0.2182	.
4930526F13Rik	ENSMUSG00000087335.4	lncRNA	chr13_55050000	0	0	0	0.9967	0.8587	-0.1381	.
4930526H09Rik	ENSMUSG00000114307.3	lncRNA	chr13_111050000	0.0022	0.0006	-0.0024	0.1368	0.7008	0.564	Top
4930526L06Rik	ENSMUSG00000097091.4	lncRNA	chr19_11250000	0.0238	0	-0.0339	0.6649	0.2117	-0.4532	.
4930527A07Rik	ENSMUSG00000086764.3	lncRNA	chr2_105300000	0	0	0	0.5797	0.4708	-0.1089	.
4930527B05Rik	ENSMUSG00000086971.2	lncRNA	chr11_81250000	0.0095	0	-0.0137	0.7402	0.3596	-0.3806	.
4930527E20Rik	ENSMUSG00000085491.3	lncRNA	chr2_30650000	0.0433	0	-0.0611	0.9909	0.968	-0.0229	.
4930527F14Rik	ENSMUSG00000115324.3	lncRNA	chr14_45800000	0.0106	0.1953	0.2421	0.7999	0.8542	0.0543	.
4930527G23Rik	ENSMUSG00000117554.3	lncRNA	chr18_29550000	0	0	0	0.3893	0.1299	-0.2594	.
4930527J03Rik	ENSMUSG00000070489.8	lncRNA	chr1_178100000	0.5608	0	-0.6423	0.5971	0.5604	-0.0368	.
4930528D03Rik	ENSMUSG00000097502.4	lncRNA	chr13_59850000	0.1904	0	-0.2514	0.9527	0.8812	-0.0715	.
4930528G23Rik	ENSMUSG00000084909.3	lncRNA	chr6_148550000	0	0	0	0.4646	0.2969	-0.1677	.
4930528H21Rik	ENSMUSG00000107681.3	lncRNA	chr6_4000000	0	0.0052	0.0075	0.5024	0.4306	-0.0717	.
4930528P14Rik	ENSMUSG00000087309.3	lncRNA	chr2_115100000	0	0.0004	0.0006	0.1364	0.3219	0.1855	.
4930529I22Rik	ENSMUSG00000085350.3	lncRNA	chr2_169200000	0.0412	0	-0.0582	0.8419	0.5278	-0.3142	.
4930529K09Rik	ENSMUSG00000115271.3	lncRNA	chr14_86500000	0	0	0	0.2948	0.2278	-0.067	.
4930529L06Rik	ENSMUSG00000132853.1	lncRNA	chr16_84450000	0	0	0	0.4052	0.3768	-0.0284	.
4930532G15Rik	ENSMUSG00000097261.4	lncRNA	chr1_185050000	0.708	0.198	-0.5117	0.7437	0.9564	0.2127	.
4930532I03Rik	ENSMUSG00000112201.3	lncRNA	chr10_106400000	0	0	0	0.3176	0.1571	-0.1605	.
4930532M18Rik	ENSMUSG00000100221.8	lncRNA	chr1_154100000	0	0	0	0.6121	0.4279	-0.1842	.
4930533B01Rik	ENSMUSG00000084798.3	lncRNA	chr2_113500000	0	0	0	0.3305	0.36	0.0295	.
4930533D04Rik	ENSMUSG00000099491.3	lncRNA	chr9_102550000	0.1362	0	-0.1842	0.817	0.8547	0.0377	.
4930533I22Rik	ENSMUSG00000093535.3	lncRNA	chr6_57450000	0.0008	0	-0.0012	0.475	0.2772	-0.1977	.
4930533K18Rik	ENSMUSG00000047692.9	lncRNA	chr10_70700000	0.0025	0.001	-0.0022	0.6565	0.7102	0.0537	.
4930533N22Rik	ENSMUSG00000108803.3	lncRNA	chr7_74700000	0.0037	0	-0.0053	0.3792	0.4666	0.0875	.
4930533P14Rik	ENSMUSG00000100589.2	lncRNA	chr1_96550000	0	0	0	0.1788	0.0152	-0.1636	.
4930534D22Rik	ENSMUSG00000097761.3	lncRNA	chr3_131050000	0.037	0.0166	-0.0286	0.7166	0.651	-0.0655	.
4930534H03Rik	ENSMUSG00000111544.3	lncRNA	chr10_91050000	0	0	0	0.4933	0.669	0.1757	.
4930534H18Rik	ENSMUSG00000116607.3	lncRNA	chr16_90700000	0.5244	0.1745	-0.3762	0.8005	0.8691	0.0686	.
4930535E02Rik	ENSMUSG00000102677.3	lncRNA	chr3_68650000	0	0	0	0.7005	0.6209	-0.0796	.
4930535G08Rik	ENSMUSG00000104201.3	lncRNA	chr1_36050000	0.4057	0	-0.4913	0.8839	0.71	-0.1739	.
4930535L15Rik	ENSMUSG00000093619.3	lncRNA	chr9_107850000	0.0635	0.0104	-0.0738	0.9225	0.974	0.0515	.
4930535O05Rik	ENSMUSG00000098360.3	lncRNA	chr8_88150000	0	0	0	0.688	0.4252	-0.2628	.
4930537H20Rik	ENSMUSG00000105350.4	lncRNA	chr3_90200000	0.4126	0.043	-0.4375	0.7324	0.9656	0.2332	.
4930538E20Rik	ENSMUSG00000085516.3	lncRNA	chr11_24100000	0.0135	0.0033	-0.0145	0.5836	0.4899	-0.0937	.
4930538L07Rik	ENSMUSG00000115719.3	lncRNA	chr14_47950000	0	0	0	0.7693	0.8945	0.1252	.
4930539C22Rik	ENSMUSG00000105765.3	lncRNA	chr3_134100000	0	0	0	0.2354	0.1563	-0.0791	.
4930539J05Rik	ENSMUSG00000097032.5	lncRNA	chr3_135100000	1.1727	0.489	-0.5452	0.5272	0.6973	0.1702	.
4930539M17Rik	ENSMUSG00000103116.3	lncRNA	chr3_9100000	0.1197	0.0042	-0.1571	0.7924	0.8013	0.0089	.
4930540M03Rik	ENSMUSG00000111299.3	lncRNA	chr9_15550000	0.0058	0	-0.0083	0.5804	0.416	-0.1644	.
4930540M05Rik	ENSMUSG00000097831.2	lncRNA	chr6_119850000	0	0.4748	0.5605	0.7685	0.8596	0.0911	.
4930541O19Rik	ENSMUSG00000117791.3	lncRNA	chr17_25900000	0	0	0	0.9507	0.9797	0.029	.
4930542C12Rik	ENSMUSG00000090724.3	lncRNA	chr9_78250000	0.0292	0.0114	-0.0252	0.7894	0.5903	-0.1991	.
4930542C16Rik	ENSMUSG00000048628.7	lncRNA	chr14_24600000	0.0068	0.0149	0.0116	0.837	0.8946	0.0576	.
4930542C21Rik	ENSMUSG00000142580.1	lncRNA	chr16_37850000	0	0	0	0.7319	0.8075	0.0756	.
4930542D17Rik	ENSMUSG00000116848.3	lncRNA	chr16_50400000	0	0	0	0.4676	0.3625	-0.1051	.
4930542M03Rik	ENSMUSG00000117085.3	lncRNA	chr17_46150000	0	0	0	0.9509	0.9416	-0.0093	.
4930543E12Rik	ENSMUSG00000110009.3	lncRNA	chr7_112700000	0.0337	0.0006	-0.047	0.7445	0.8891	0.1445	.
4930543I03Rik	ENSMUSG00000116171.3	lncRNA	chr15_86550000	0.0023	0	-0.0033	0.8844	0.376	-0.5083	Bottom
4930543K20Rik	ENSMUSG00000110799.2	lncRNA	chr10_37100000	0	0	0	0.6238	0.6787	0.0548	.
4930543N07Rik	ENSMUSG00000110037.3	lncRNA	chr7_138150000	0.0117	0	-0.0168	0.7304	0.1368	-0.5936	Bottom
4930544D05Rik	ENSMUSG00000087279.11	protein_coding	chr11_70500000	0	0	0	0.9534	0.9763	0.0229	.
4930544F09Rik	ENSMUSG00000115062.2	lncRNA	chr15_58850000	0	0.0409	0.0578	0.8353	0.9193	0.0841	.
4930544G11Rik	ENSMUSG00000036463.9	protein_coding	chr6_65900000	0	0	0	0.3816	0.3032	-0.0783	.
4930544I03Rik	ENSMUSG00000097071.4	lncRNA	chr12_90850000	0	0.0005	0.0007	0.2743	0.4244	0.1501	.
4930544M13Rik	ENSMUSG00000051758.8	lncRNA	chr13_114800000	0	0	0	0.4635	0.3642	-0.0993	.
4930545E07Rik	ENSMUSG00000117615.3	lncRNA	chr18_17700000	0	0	0	0.4232	0.1805	-0.2427	.
4930545H06Rik	ENSMUSG00000112157.3	lncRNA	chr10_68150000	0	0	0	0.6188	0.555	-0.0638	.
4930545L08Rik	ENSMUSG00000111054.3	lncRNA	chr9_111700000	0	0	0	0.4881	0.2037	-0.2843	.
4930545L23Rik	ENSMUSG00000085247.3	lncRNA	chr2_135050000	0	0.0057	0.0083	0.2546	0.5097	0.2551	Top
4930546B01Rik	ENSMUSG00000121652.2	lncRNA	chr12_61400000	0	0	0	0.1932	0.0331	-0.1601	.
4930546C10Rik	ENSMUSG00000024546.8	lncRNA	chr18_69050000	0	0.0137	0.0197	0.5349	0.8066	0.2716	Top
4930546K05Rik	ENSMUSG00000111767.3	lncRNA	chr9_42050000	0.005	0.0007	-0.0062	0.897	0.9354	0.0384	.
4930547E08Rik	ENSMUSG00000086687.3	lncRNA	chr2_103600000	0	0	0	0.7028	0.9024	0.1996	.
4930547E14Rik	ENSMUSG00000116894.3	lncRNA	chr16_59450000	0	0.0007	0.001	0.389	0.326	-0.063	.
4930547H16Rik	ENSMUSG00000112957.3	lncRNA	chr13_69900000	0	0	0	0.7207	0.5028	-0.2179	.
4930547M16Rik	ENSMUSG00000097890.5	lncRNA	chr10_39750000	0.0375	0.0602	0.0311	0.7428	0.8417	0.0989	.
4930548G14Rik	ENSMUSG00000051198.8	lncRNA	chr15_46450000	0	0	0	0.2995	0.0392	-0.2603	.
4930548J01Rik	ENSMUSG00000116615.3	lncRNA	chr17_4250000	0	0	0	0.63	0.3537	-0.2764	.
4930548K13Rik	ENSMUSG00000086257.3	lncRNA	chr4_26600000	0	0	0	0.2433	0.0911	-0.1522	.
4930549C15Rik	ENSMUSG00000114048.3	lncRNA	chr12_26400000	0	0	0	0.8271	0.8627	0.0356	.
4930549G23Rik	ENSMUSG00000118134.4	lncRNA	chr18_67850000	0.1806	0.1924	0.0143	0.7249	0.9597	0.2347	.
4930549P19Rik	ENSMUSG00000116984.3	lncRNA	chr17_19700000	0	0	0	0.3175	0.0352	-0.2823	.
4930550C14Rik	ENSMUSG00000005131.5	protein_coding	chr9_53300000	0.0737	0.0935	0.0264	0.7621	0.5732	-0.1889	.
4930550C17Rik	ENSMUSG00000097361.3	lncRNA	chr13_56350000	0	0	0	0.95	0.9032	-0.0469	.
4930551E15Rik	ENSMUSG00000085899.3	lncRNA	chr7_123850000	0.0034	0	-0.0049	0.5297	0.1137	-0.416	.
4930551I15Rik	ENSMUSG00000112108.3	lncRNA	chr10_71300000	0	0	0	0.5695	0.3741	-0.1954	.
4930551I23Rik	ENSMUSG00000116674.3	lncRNA	chr16_84450000	0	0	0	0.4052	0.3768	-0.0284	.
4930551L18Rik	ENSMUSG00000085377.3	lncRNA	chr4_94950000	0	0.01	0.0143	0.5497	0.7319	0.1822	.
4930551O13Rik	ENSMUSG00000086430.3	lncRNA	chr2_5050000	0	0	0	0.8349	0.7551	-0.0798	.
4930553E22Rik	ENSMUSG00000116907.3	lncRNA	chr16_84050000	0	0	0	0.2281	0.1161	-0.112	.
4930553J12Rik	ENSMUSG00000116983.3	lncRNA	chr16_88600000	0	0	0	0.1832	0.0963	-0.0869	.
4930553M12Rik	ENSMUSG00000054351.3	lncRNA	chr4_88750000	0	0	0	0.4328	0.5396	0.1068	.
4930554C24Rik	ENSMUSG00000099724.4	lncRNA	chr9_84700000	0	0	0	0.0524	0.2387	0.1863	.
4930554G24Rik	ENSMUSG00000085452.3	lncRNA	chr11_14100000	0.0016	0	-0.0022	0.387	0.1808	-0.2062	.
4930554H23Rik	ENSMUSG00000097682.3	lncRNA	chr7_63000000	0.0019	0	-0.0027	0.4514	0.1742	-0.2772	.
4930554I06Rik	ENSMUSG00000118047.3	lncRNA	chr19_21050000	0	0	0	0.6174	0.5407	-0.0767	.
4930555A03Rik	ENSMUSG00000106157.4	lncRNA	chr3_151000000	0	0.0367	0.052	0.1337	0.2389	0.1052	.
4930555B11Rik	ENSMUSG00000086396.3	lncRNA	chr2_57050000	0	0.0049	0.0071	0.5315	0.5091	-0.0223	.
4930555B12Rik	ENSMUSG00000085619.3	lncRNA	chrX_113800000	0	0	0	0.2068	0.0595	-0.1474	.
4930555F03Rik	ENSMUSG00000031559.17	lncRNA	chr8_49800000	0	0.0003	0.0004	0.2962	0.4007	0.1045	.
4930555G07Rik	ENSMUSG00000112213.3	lncRNA	chr10_87050000	0	0	0	0.4864	0.4138	-0.0725	.
4930555G21Rik	ENSMUSG00000113329.3	lncRNA	chr13_53800000	0.0946	0	-0.1305	0.9787	0.4878	-0.491	Bottom
4930555K05Rik	ENSMUSG00000141301.1	lncRNA	chr13_73350000	0	0	0	0.6593	0.2218	-0.4375	.
4930555K19Rik	ENSMUSG00000130787.1	lncRNA	chr15_41050000	0.0246	0	-0.0351	0.506	0.547	0.041	.
4930555M17Rik	ENSMUSG00000093557.3	lncRNA	chr3_5550000	0	0	0	0.423	0.2433	-0.1797	.
4930555O08Rik	ENSMUSG00000085676.3	lncRNA	chr11_32700000	0	0	0	0.9015	0.8364	-0.0651	.
4930556C24Rik	ENSMUSG00000116586.3	lncRNA	chr16_85600000	0.0211	0	-0.0301	0.2946	0.4156	0.121	.
4930556G01Rik	ENSMUSG00000085522.3	lncRNA	chr4_30650000	0	0	0	0.2742	0.2135	-0.0607	.
4930556G22Rik	ENSMUSG00000101764.3	lncRNA	chr1_72050000	0	0	0	0.5761	0.6849	0.1088	.
4930556I23Rik	ENSMUSG00000089767.3	lncRNA	chr1_37650000	0	0	0	0.9068	0.7713	-0.1355	.
4930556J02Rik	ENSMUSG00000115656.3	lncRNA	chr14_61750000	0.0401	0	-0.0567	0.823	0.8502	0.0271	.
4930556J24Rik	ENSMUSG00000034493.2	protein_coding	chr11_3850000	0	0.0044	0.0063	0.937	0.8813	-0.0557	.
4930556L07Rik	ENSMUSG00000086800.3	lncRNA	chr2_151550000	0	0	0	0.6619	0.6318	-0.0301	.
4930556M19Rik	ENSMUSG00000096971.5	lncRNA	chr15_10700000	0.0765	0.0107	-0.091	0.7152	0.428	-0.2872	.
4930556N09Rik	ENSMUSG00000111924.3	lncRNA	chr10_96850000	0	0	0	0.2781	0.2967	0.0186	.
4930556N13Rik	ENSMUSG00000092399.3	lncRNA	chr11_88750000	0.0118	0	-0.0169	0.7354	0.6563	-0.0791	.
4930557F08Rik	ENSMUSG00000115266.3	lncRNA	chr15_15800000	0	0	0	0.3081	0.0744	-0.2336	.
4930557F10Rik	ENSMUSG00000085488.3	lncRNA	chr13_23450000	0	0.0024	0.0034	0.6946	0.5596	-0.135	.
4930557J02Rik	ENSMUSG00000106902.3	lncRNA	chr5_34250000	0	0	0	0.851	0.9745	0.1234	.
4930557K07Rik	ENSMUSG00000108034.3	lncRNA	chr6_124950000	0.0089	0.001	-0.0113	0.7487	0.8506	0.102	.
4930558F17Rik	ENSMUSG00000106506.3	lncRNA	chr5_11150000	0	0	0	0.3358	0.0521	-0.2836	.
4930558G05Rik	ENSMUSG00000086244.3	lncRNA	chrX_127950000	0	0	0	0.0043	0.0752	0.071	.
4930558J18Rik	ENSMUSG00000097519.5	lncRNA	chr1_57400000	0.3455	0.3452	-0.0003	0.6925	0.7219	0.0294	.
4930558J22Rik	ENSMUSG00000075029.9	lncRNA	chr13_23900000	2.0293	0.0218	-1.5678	0.6034	0.7658	0.1624	.
4930558K02Rik	ENSMUSG00000086277.3	protein_coding	chr1_161800000	0.0089	0.0052	-0.0053	0.6087	0.7761	0.1674	.
4930558N01Rik	ENSMUSG00000120382.2	lncRNA	chr7_98300000	3.5873	9.8597	1.2433	0.8269	0.8977	0.0707	.
4930559C10Rik	ENSMUSG00000113164.3	lncRNA	chr12_93350000	0	0	0	0.2025	0.0047	-0.1978	.
4930562A09Rik	ENSMUSG00000086945.3	lncRNA	chr5_116500000	0.1287	0	-0.1746	0.9742	0.4572	-0.517	Bottom
4930562C15Rik	ENSMUSG00000022518.17	protein_coding	chr16_4650000	0.0361	0	-0.0512	0.9809	0.8585	-0.1224	.
4930562D21Rik	ENSMUSG00000086608.3	lncRNA	chr9_79550000	0	0	0	0.1841	0.3365	0.1524	.
4930562F07Rik	ENSMUSG00000026729.11	lncRNA	chr1_159900000	0	0.0315	0.0447	0.5447	0.6026	0.0579	.
4930562F17Rik	ENSMUSG00000104014.3	lncRNA	chr1_158950000	0	0	0	0.2204	0.3161	0.0956	.
4930563E18Rik	ENSMUSG00000097387.2	lncRNA	chr18_10700000	0.0375	0.0179	-0.0276	0.6723	0.7267	0.0545	.
4930563E22Rik	ENSMUSG00000053574.6	protein_coding	chr11_72100000	1.2185	3.0608	0.8722	0.7237	0.7744	0.0508	.
4930563F08Rik	ENSMUSG00000105773.3	lncRNA	chr5_131900000	0	0	0	0.6152	0.5819	-0.0334	.
4930563H07Rik	ENSMUSG00000107656.3	lncRNA	chr6_48900000	0	0	0	0.9222	0.778	-0.1441	.
4930563I02Rik	ENSMUSG00000086112.3	lncRNA	chr14_60300000	0.0184	0	-0.0262	0.8692	0.4952	-0.374	.
4930563J15Rik	ENSMUSG00000112141.3	lncRNA	chr10_67400000	0	0	0	0.7956	0.7406	-0.055	.
4930563M21Rik	ENSMUSG00000050702.8	lncRNA	chr9_55900000	0.0035	0	-0.005	0.818	0.6645	-0.1534	.
4930563N14Rik	ENSMUSG00000116554.3	lncRNA	chr13_113200000	0	0	0	0.6126	0.5147	-0.0979	.
4930564C03Rik	ENSMUSG00000132240.1	lncRNA	chr17_45150000	0	0	0	0.7334	0.5627	-0.1707	.
4930564D02Rik	ENSMUSG00000051788.6	lncRNA	chr3_104950000	0	0	0	0.6952	0.8603	0.1651	.
4930565D16Rik	ENSMUSG00000104004.3	lncRNA	chr3_84250000	0	0	0	0.8973	0.8728	-0.0245	.
4930565N06Rik	ENSMUSG00000084834.3	lncRNA	chr16_36700000	0	0.0014	0.0021	0.7689	0.6721	-0.0968	.
4930566F21Rik	ENSMUSG00000107142.4	lncRNA	chr5_31600000	1.7467	0.0021	-1.4546	0.9241	0.8349	-0.0892	.
4930567H12Rik	ENSMUSG00000110629.3	lncRNA	chr8_126300000	0.0134	0.0005	-0.0186	0.9161	0.7688	-0.1473	.
4930567H17Rik	ENSMUSG00000073141.9	lncRNA	chrX_69400000	0.1983	0	-0.261	0.5585	0.5709	0.0124	.
4930567J20Rik	ENSMUSG00000116982.3	lncRNA	chr16_71000000	0	0	0	0.1626	0.2494	0.0868	.
4930567K12Rik	ENSMUSG00000109382.2	lncRNA	chr7_91750000	0	0	0	0.3078	0.1829	-0.1248	.
4930567K20Rik	ENSMUSG00000112730.3	lncRNA	chr10_10600000	0	0	0	0.4788	0.3317	-0.1471	.
4930568A12Rik	ENSMUSG00000101223.9	lncRNA	chr1_34500000	0.0085	0.0011	-0.0106	0.8708	0.7097	-0.1611	.
4930568A13Rik	ENSMUSG00000104638.3	lncRNA	chr5_13800000	0	0	0	0.3431	0.1153	-0.2278	.
4930568D16Rik	ENSMUSG00000026882.2	protein_coding	chr2_35250000	0.0123	0	-0.0177	0.7866	0.9154	0.1288	.
4930568E12Rik	ENSMUSG00000111830.3	lncRNA	chr9_13050000	0	0	0	0.4716	0.1427	-0.3289	.
4930568G15Rik	ENSMUSG00000102408.3	lncRNA	chr1_164850000	0.0156	0	-0.0224	0.5862	0.6383	0.0521	.
4930570B17Rik	ENSMUSG00000115337.2	lncRNA	chr15_30600000	0	0	0	0.7666	0.589	-0.1776	.
4930570D08Rik	ENSMUSG00000084875.4	lncRNA	chrX_132750000	0	0	0	0.4504	0.4075	-0.0429	.
4930570E03Rik	ENSMUSG00000116786.3	lncRNA	chr16_78550000	0.0024	0	-0.0034	0.1996	0.0445	-0.1551	.
4930570G19Rik	ENSMUSG00000085084.10	lncRNA	chr3_156100000	0.0019	0.1607	0.2122	0.0598	0.2441	0.1842	.
4930570N18Rik	ENSMUSG00000089683.4	lncRNA	chr1_192850000	0.008	0.0021	-0.0086	0.6078	0.5483	-0.0595	.
4930571K23Rik	ENSMUSG00000090457.5	protein_coding	chr7_124950000	0.0909	0	-0.1255	0.7313	0.428	-0.3033	.
4930571N24Rik	ENSMUSG00000086467.4	lncRNA	chr15_77300000	0	0	0	0.9068	0.7496	-0.1572	.
4930572G02Rik	ENSMUSG00000115725.3	lncRNA	chr14_48800000	0.0159	0.0012	-0.021	0.723	0.6322	-0.0908	.
4930572K03Rik	ENSMUSG00000105308.6	lncRNA	chr5_127250000	0	0	0	0.7017	0.1072	-0.5945	Bottom
4930573C15Rik	ENSMUSG00000106020.3	lncRNA	chr5_146600000	0.3726	0	-0.4569	0.8246	0.6225	-0.2021	.
4930573H18Rik	ENSMUSG00000104766.3	lncRNA	chr3_96950000	0	0.0018	0.0026	0.8922	0.6682	-0.224	.
4930573I07Rik	ENSMUSG00000104980.3	lncRNA	chr5_128600000	0.0385	0	-0.0545	0.8577	0.3521	-0.5056	Bottom
4930573O16Rik	ENSMUSG00000137369.1	lncRNA	chr2_52200000	0	0	0	0.6812	0.5624	-0.1188	.
4930577H14Rik	ENSMUSG00000087517.3	lncRNA	chr4_91800000	0	0	0	0.1066	0.0662	-0.0404	.
4930578E11Rik	ENSMUSG00000117618.3	lncRNA	chr18_29500000	0	0	0	0.4667	0.1391	-0.3276	.
4930578G10Rik	ENSMUSG00000054885.14	lncRNA	chr4_42800000	0.0032	0.0183	0.0215	0.7949	0.4581	-0.3368	.
4930578I06Rik	ENSMUSG00000021961.7	protein_coding	chr14_64200000	0.009	0	-0.013	0.9686	0.8039	-0.1648	.
4930578M01Rik	ENSMUSG00000097587.5	lncRNA	chr15_98850000	2.1978	0.7953	-0.8328	0.9475	0.9682	0.0207	.
4930578M07Rik	ENSMUSG00000110586.3	lncRNA	chr8_106550000	0.5992	0.0624	-0.59	0.7901	0.9269	0.1368	.
4930578N18Rik	ENSMUSG00000116695.3	lncRNA	chr16_75900000	0	0	0	0.495	0.2151	-0.2798	.
4930579C12Rik	ENSMUSG00000074146.11	lncRNA	chr9_89000000	0.0019	0.0134	0.0166	0.3179	0.0492	-0.2688	.
4930579D07Rik	ENSMUSG00000116813.3	lncRNA	chr17_4900000	0	0	0	0.8021	0.5944	-0.2076	.
4930579D09Rik	ENSMUSG00000084971.3	lncRNA	chr6_143450000	0	0	0	0.5292	0.4234	-0.1058	.
4930579F01Rik	ENSMUSG00000012042.10	protein_coding	chr3_137850000	0	0	0	0.5386	0.5314	-0.0073	.
4930579G18Rik	ENSMUSG00000040840.9	lncRNA	chr14_54850000	0.4217	0.1325	-0.3281	0.9694	0.9266	-0.0428	.
4930579G24Rik	ENSMUSG00000027811.10	protein_coding	chr3_79500000	12.0597	16.9613	0.4598	0.4799	0.684	0.2041	.
4930579H20Rik	ENSMUSG00000101636.3	lncRNA	chr10_27250000	0	0	0	0.3247	0.2178	-0.1068	.
4930579J19Rik	ENSMUSG00000114895.3	lncRNA	chr13_38600000	0	0	0	0.9676	0.5832	-0.3844	.
4930579K19Rik	ENSMUSG00000051074.7	lncRNA	chr9_98400000	0.2103	2.5596	1.5563	0.7245	0.5956	-0.1289	.
4930579M01Rik	ENSMUSG00000086190.3	lncRNA	chr8_47450000	0	0	0	0.7781	0.7979	0.0197	.
4930579O11Rik	ENSMUSG00000090732.3	lncRNA	chr8_82350000	0	0	0	0.1899	0.3193	0.1293	.
4930579P08Rik	ENSMUSG00000112924.3	lncRNA	chr10_116550000	0	0	0	0.7154	0.3627	-0.3527	.
4930580E04Rik	ENSMUSG00000106269.3	lncRNA	chr5_23600000	0.0362	0	-0.0514	0.6583	0.9052	0.2469	.
4930581F22Rik	ENSMUSG00000070315.15	lncRNA	chr9_35000000	0.4032	1.9299	1.0621	0.7829	0.8637	0.0808	.
4930583I09Rik	ENSMUSG00000024088.5	protein_coding	chr17_65100000	0	0	0	0.5677	0.4841	-0.0837	.
4930583K01Rik	ENSMUSG00000055159.10	lncRNA	chr7_117800000	0.4955	0.1729	-0.3505	0.6401	0.6765	0.0364	.
4930583P06Rik	ENSMUSG00000086954.3	lncRNA	chr2_124050000	0	0	0	0.2855	0.6325	0.347	Top
4930584F24Rik	ENSMUSG00000029044.11	lncRNA	chr5_26650000	0.0099	0	-0.0142	0.6984	0.1927	-0.5057	Bottom
4930586N03Rik	ENSMUSG00000087097.3	lncRNA	chr13_23500000	0	0	0	0.6037	0.4262	-0.1775	.
4930587A21Rik	ENSMUSG00000086009.3	lncRNA	chr1_61650000	0	0	0	0.4956	0.7159	0.2203	.
4930587E11Rik	ENSMUSG00000107563.4	lncRNA	chr6_102200000	0	0	0	0.0449	0.1138	0.0689	.
4930588A03Rik	ENSMUSG00000117792.3	lncRNA	chr18_43250000	0.0008	0.0002	-0.0009	0.4123	0.6487	0.2364	.
4930588G17Rik	ENSMUSG00000108935.3	lncRNA	chr7_120250000	0	0.0054	0.0077	0.6922	0.653	-0.0391	.
4930588J15Rik	ENSMUSG00000115858.3	lncRNA	chr15_92550000	0.019	0	-0.0271	0.4462	0.6027	0.1565	.
4930588K23Rik	ENSMUSG00000075335.5	lncRNA	chr16_18400000	0	0	0	0.9908	0.9415	-0.0492	.
4930589L23Rik	ENSMUSG00000068957.3	lncRNA	chr3_79450000	0.193	0.028	-0.2149	0.6911	0.7376	0.0465	.
4930589P08Rik	ENSMUSG00000085593.3	lncRNA	chr4_151450000	0.0069	0	-0.01	0.9576	0.5475	-0.4101	.
4930590J08Rik	ENSMUSG00000034063.10	protein_coding	chr6_91900000	0.0221	0.0422	0.0281	0.8583	0.7858	-0.0725	.
4930590L14Rik	ENSMUSG00000106540.3	lncRNA	chr3_140650000	0	0	0	0.1333	0.0725	-0.0608	.
4930590L20Rik	ENSMUSG00000102368.3	lncRNA	chr1_140450000	0.0205	0	-0.0292	0.1619	0.0653	-0.0967	.
4930591A17Rik	ENSMUSG00000039138.4	lncRNA	chr2_179050000	5.9133	0	-2.7894	0.8685	0.5191	-0.3494	.
4930591E09Rik	ENSMUSG00000111234.3	lncRNA	chr10_38050000	0	0	0	0.276	0.4689	0.1929	.
4930592A05Rik	ENSMUSG00000115779.3	lncRNA	chr15_33550000	0	0	0	0.5574	0.2092	-0.3482	.
4930592C13Rik	ENSMUSG00000105834.4	lncRNA	chr3_157200000	0	0.1766	0.2346	0.3417	0.3336	-0.0081	.
4930592I03Rik	ENSMUSG00000118339.3	lncRNA	chr18_82900000	0.1525	0	-0.2048	0.7733	0.753	-0.0202	.
4930593A02Rik	ENSMUSG00000097725.6	lncRNA	chr3_58600000	0.0111	0.0052	-0.0085	0.7173	0.597	-0.1203	.
4930593C16Rik	ENSMUSG00000086365.4	lncRNA	chr9_120750000	0.0394	0.0165	-0.0323	0.9158	0.803	-0.1128	.
4930594A02Rik	ENSMUSG00000112270.3	lncRNA	chr10_51600000	0	0	0	0.2965	0.0692	-0.2273	.
4930594M17Rik	ENSMUSG00000097181.3	lncRNA	chr18_81250000	0	0	0	0.7555	0.5761	-0.1794	.
4930594M22Rik	ENSMUSG00000075463.5	lncRNA	chr14_123150000	0.1049	0.0258	-0.1072	0.4537	0.4552	0.0015	.
4930594O21Rik	ENSMUSG00000085677.9	lncRNA	chr3_37650000	0	0	0	0.7828	0.8423	0.0595	.
4930595D18Rik	ENSMUSG00000083193.3	lncRNA	chr12_111150000	0	0.001	0.0014	0.8122	0.8838	0.0715	.
4930595L18Rik	ENSMUSG00000107929.3	lncRNA	chr6_98600000	0	0	0	0.5456	0.4218	-0.1237	.
4930596D02Rik	ENSMUSG00000041068.7	protein_coding	chr14_35500000	0	0	0	0.3425	0.1632	-0.1793	.
4930596I21Rik	ENSMUSG00000104900.3	lncRNA	chr1_138900000	1.5196	0.1013	-1.1941	0.4514	0.5923	0.1408	.
4930597A21Rik	ENSMUSG00000086501.3	lncRNA	chr11_44450000	0.0323	0	-0.0458	0.6774	0.6947	0.0173	.
4930597G03Rik	ENSMUSG00000115540.3	lncRNA	chr14_51550000	0.0059	0	-0.0085	0.5083	0.1235	-0.3848	.
4930597O21Rik	ENSMUSG00000053442.6	lncRNA	chr6_66850000	0	0.7621	0.8173	0.5027	0.6248	0.1221	.
4930598F16Rik	ENSMUSG00000100777.3	lncRNA	chr1_95600000	0.0108	0	-0.0156	0.2624	0.0275	-0.2349	.
4930598N05Rik	ENSMUSG00000109160.3	lncRNA	chr10_10100000	0	0.0007	0.001	0.4125	0.4062	-0.0063	.
4930599A14Rik	ENSMUSG00000101600.3	lncRNA	chr1_126750000	0	0.015	0.0215	0.5411	0.6382	0.0971	.
4930599N23Rik	ENSMUSG00000073144.7	lncRNA	chr6_39100000	0	0.0187	0.0267	0.6962	0.8121	0.116	.
4931400O07Rik	ENSMUSG00000031194.3	lncRNA	chrX_61500000	0	0	0	0.2249	0.1242	-0.1007	.
4931402G19Rik	ENSMUSG00000134591.1	lncRNA	chr2_120250000	0	0	0	0.8557	0.8711	0.0154	.
4931403E22Rik	ENSMUSG00000093772.2	lncRNA	chr19_26750000	0	0.0072	0.0104	0.7121	0.6402	-0.0719	.
4931403G20Rik	ENSMUSG00000130781.1	lncRNA	chr12_69900000	0	0	0	0.6177	0.8949	0.2772	Top
4931406C07Rik	ENSMUSG00000031938.16	protein_coding	chr9_15150000	2.6276	13.1455	1.9633	0.7769	0.645	-0.1319	.
4931406G06Rik	ENSMUSG00000085398.2	lncRNA	chr16_90800000	0.0155	0.0059	-0.0137	0.6722	0.8866	0.2144	.
4931407E12Rik	ENSMUSG00000114352.3	lncRNA	chr14_21900000	0	0	0	0.8338	0.7625	-0.0712	.
4931408D14Rik	ENSMUSG00000120174.2	lncRNA	chr19_37200000	0.0373	0.0768	0.054	0.8563	0.8749	0.0186	.
4931413I07Rik	ENSMUSG00000092602.3	lncRNA	chr17_34000000	0	0	0	0.9605	0.8942	-0.0663	.
4931413K12Rik	ENSMUSG00000085088.3	lncRNA	chr11_75450000	0.0322	0	-0.0457	0.977	0.9975	0.0205	.
4931414P19Rik	ENSMUSG00000022179.6	protein_coding	chr14_54800000	1.4848	2.7224	0.5831	0.7866	0.9669	0.1802	.
4931415C17Rik	ENSMUSG00000054910.7	lncRNA	chr8_12700000	0.15	0.0954	-0.0702	0.9118	0.9061	-0.0057	.
4931419H13Rik	ENSMUSG00000106589.3	lncRNA	chr3_55000000	0	0	0	0.6672	0.8531	0.1859	.
4931420L22Rik	ENSMUSG00000116750.3	lncRNA	chr16_70900000	0	0	0	0.2043	0.0288	-0.1755	.
4931422A03Rik	ENSMUSG00000046085.9	lncRNA	chr2_103800000	0.0057	0.0006	-0.0074	0.7405	0.9125	0.172	.
4931429L15Rik	ENSMUSG00000056617.13	protein_coding	chr9_46200000	0.01	0	-0.0144	0.9762	0.9023	-0.074	.
4931429P17Rik	ENSMUSG00000047324.7	lncRNA	chr13_48150000	0	0	0	0.8556	0.5567	-0.2988	.
4931431B13Rik	ENSMUSG00000108354.3	lncRNA	chr7_127750000	0	0	0	0.8968	0.6897	-0.2072	.
4931431C16Rik	ENSMUSG00000055061.7	lncRNA	chr5_35700000	0.0662	0.0032	-0.088	0.9572	0.985	0.0278	.
4931439C15Rik	ENSMUSG00000117661.3	lncRNA	chr18_78500000	0	0	0	0.5697	0.6615	0.0917	.
4932411K12Rik	ENSMUSG00000100733.4	lncRNA	chr13_101500000	0	0	0	0.2283	0.6009	0.3726	Top
4932412D23Rik	ENSMUSG00000075070.8	lncRNA	chr16_42500000	0.0106	0.0011	-0.0137	0.317	0.6983	0.3813	Top
4932413F04Rik	ENSMUSG00000099616.3	lncRNA	chr9_103450000	0.0036	0.0043	0.0009	0.7498	0.8895	0.1397	.
4932414J04Rik	ENSMUSG00000078962.6	lncRNA	chr11_21450000	0	0	0	0.6153	0.5522	-0.0631	.
4932414N04Rik	ENSMUSG00000079324.12	protein_coding	chr2_68550000	0	0	0	0.4405	0.2636	-0.1769	.
4932415M13Rik	ENSMUSG00000121640.2	lncRNA	chr17_54000000	0.0096	0.018	0.0119	0.3516	0.2452	-0.1064	.
4932416K20Rik	ENSMUSG00000069925.8	lncRNA	chr8_105500000	0	0	0	0.5171	0.1813	-0.3358	.
4932435O22Rik	ENSMUSG00000062391.5	lncRNA	chr11_114250000	0	0.0004	0.0005	0.9171	0.4369	-0.4802	Bottom
4932441J04Rik	ENSMUSG00000097216.5	lncRNA	chr5_57800000	0	0.0315	0.0447	0.3941	0.1084	-0.2857	.
4932443L11Rik	ENSMUSG00000086805.11	lncRNA	chr8_4200000	0.0035	0.0058	0.0033	0.6574	0.6358	-0.0215	.
4932702P03Rik	ENSMUSG00000086796.4	lncRNA	chr13_25050000	0	0.0016	0.0023	0.7712	0.6754	-0.0958	.
4933400B14Rik	ENSMUSG00000117364.3	lncRNA	chr17_89600000	0	0	0	0.2404	0.206	-0.0344	.
4933400C23Rik	ENSMUSG00000101734.3	lncRNA	chr9_92600000	0	0	0	0.41	0.2287	-0.1814	.
4933400F21Rik	ENSMUSG00000102009.8	lncRNA	chr1_89550000	0.005	0.0012	-0.0054	0.9553	0.9669	0.0116	.
4933400L20Rik	ENSMUSG00000110336.3	lncRNA	chr8_104450000	0.0013	0	-0.0019	0.5584	0.315	-0.2434	.
4933401B06Rik	ENSMUSG00000121636.1	lncRNA	chrX_106550000	0	0	0	0.1465	0.1041	-0.0423	.
4933401D09Rik	ENSMUSG00000116924.2	lncRNA	chr17_15850000	0.5311	0	-0.6146	0.6182	0.4448	-0.1734	.
4933401H06Rik	ENSMUSG00000106306.6	lncRNA	chr3_135500000	0	0	0	0.3415	0.3496	0.0082	.
4933401L05Rik	ENSMUSG00000118060.3	lncRNA	chr18_83400000	0	0	0	0.6212	0.3897	-0.2314	.
4933402C05Rik	ENSMUSG00000109197.3	lncRNA	chr7_6000000	0	0	0	0.3762	0.2226	-0.1536	.
4933402C06Rik	ENSMUSG00000102004.5	lncRNA	chr7_40250000	0.0027	0	-0.0039	0.4753	0.1418	-0.3336	.
4933402D24Rik	ENSMUSG00000025961.3	lncRNA	chr1_63750000	0	0.1441	0.1942	0.6197	0.784	0.1643	.
4933402J07Rik	ENSMUSG00000069971.6	protein_coding	chr8_88250000	0	0	0	0.8505	0.5606	-0.2899	.
4933402J10Rik	ENSMUSG00000106013.6	lncRNA	chr5_60100000	0	0	0	0.2744	0.0976	-0.1768	.
4933402J15Rik	ENSMUSG00000115845.3	lncRNA	chr14_74600000	0	0.0017	0.0024	0.3819	0.2408	-0.1411	.
4933402N03Rik	ENSMUSG00000013668.10	protein_coding	chr7_130700000	0.0194	0	-0.0277	0.8277	0.2936	-0.5341	Bottom
4933403J19Rik	ENSMUSG00000118000.3	lncRNA	chr19_43900000	0	0	0	0.8607	0.9303	0.0697	.
4933404G15Rik	ENSMUSG00000116096.3	lncRNA	chr16_16500000	0	0	0	0.65	0.1922	-0.4577	.
4933404I11Rik	ENSMUSG00000101153.3	lncRNA	chr7_39900000	0	0	0	0.5562	0.3629	-0.1933	.
4933404K08Rik	ENSMUSG00000085122.3	lncRNA	chr13_23450000	0	0.0105	0.0151	0.6946	0.5596	-0.135	.
4933404K13Rik	ENSMUSG00000111342.3	lncRNA	chr10_43650000	0.0366	0	-0.0519	0.7358	0.5814	-0.1544	.
4933404O12Rik	ENSMUSG00000097908.10	lncRNA	chr5_136950000	2.3211	3.8907	0.5584	0.9508	0.853	-0.0979	.
4933405D12Rik	ENSMUSG00000097852.8	lncRNA	chr3_122700000	0.0471	0.0212	-0.0361	0.4273	0.6408	0.2135	.
4933405E24Rik	ENSMUSG00000086209.3	lncRNA	chr11_54100000	0	0	0	0.9208	0.7654	-0.1554	.
4933405L10Rik	ENSMUSG00000013158.7	protein_coding	chr8_106400000	0.1285	0.9184	0.7655	0.9122	0.9512	0.039	.
4933405O20Rik	ENSMUSG00000084234.3	protein_coding	chr7_50250000	0	0	0	0.4691	0.2175	-0.2516	.
4933406B15Rik	ENSMUSG00000112421.3	lncRNA	chr12_80600000	0	0.0058	0.0084	0.8947	0.9875	0.0928	.
4933406B17Rik	ENSMUSG00000110427.3	lncRNA	chr8_96200000	0.0228	0.0056	-0.0244	0.6791	0.8233	0.1442	.
4933406C10Rik	ENSMUSG00000097494.10	lncRNA	chr12_33000000	0	0.0478	0.0673	0.5873	0.689	0.1017	.
4933406D12Rik	ENSMUSG00000085796.3	lncRNA	chr2_146350000	0	0	0	0.5608	0.5083	-0.0525	.
4933406F09Rik	ENSMUSG00000090585.10	lncRNA	chr14_15050000	0	0	0	0.7872	0.1996	-0.5876	Bottom
4933406I18Rik	ENSMUSG00000087475.6	lncRNA	chr7_113950000	0.0033	0.0363	0.0467	0.2271	0.4438	0.2167	.
4933406J09Rik	ENSMUSG00000107666.3	lncRNA	chr6_134250000	0.0647	0.0005	-0.0897	0.6356	0.6177	-0.018	.
4933406J10Rik	ENSMUSG00000086690.3	lncRNA	chr7_82350000	0.0071	0	-0.0102	0.6154	0.7648	0.1494	.
4933406K04Rik	ENSMUSG00000085820.9	lncRNA	chr12_106650000	0.0054	0	-0.0078	0.8523	0.1727	-0.6797	Bottom
4933406P04Rik	ENSMUSG00000069713.5	lncRNA	chr10_20150000	0.6251	1.6495	0.7052	0.7438	0.9049	0.161	.
4933407E24Rik	ENSMUSG00000073759.8	lncRNA	chr4_124450000	0.0243	0.0244	0	0.9452	0.756	-0.1892	.
4933407I05Rik	ENSMUSG00000111836.3	lncRNA	chr9_51800000	0	0	0	0.684	0.5457	-0.1383	.
4933407I08Rik	ENSMUSG00000084959.3	lncRNA	chr18_43050000	0	0	0	0.554	0.5733	0.0193	.
4933407K13Rik	ENSMUSG00000087396.10	lncRNA	chrX_74800000	0.9055	0.6714	-0.1891	0.5299	0.7075	0.1776	.
4933407L21Rik	ENSMUSG00000026224.12	protein_coding	chr1_85850000	0	8.6837	3.2756	0.8148	0.7661	-0.0487	.
4933408A14Rik	ENSMUSG00000106136.4	lncRNA	chr5_72800000	0	0	0	0.5894	0.4861	-0.1033	.
4933408J17Rik	ENSMUSG00000097407.3	lncRNA	chr10_93400000	0.0105	0.0056	-0.007	0.8025	0.9256	0.123	.
4933408N05Rik	ENSMUSG00000084848.3	lncRNA	chr8_115050000	0	0	0	0.5802	0.277	-0.3031	.
4933409D19Rik	ENSMUSG00000104366.3	lncRNA	chr1_136450000	0.0101	0	-0.0144	0.6498	0.7735	0.1237	.
4933409F18Rik	ENSMUSG00000113218.3	lncRNA	chr12_26850000	0.0162	0	-0.0232	0.692	0.5946	-0.0974	.
4933409G03Rik	ENSMUSG00000053896.15	protein_coding	chr2_68400000	0	0	0	0.3834	0.2701	-0.1134	.
4933411E02Rik	ENSMUSG00000110876.3	lncRNA	chr9_112250000	0	0	0	0.4648	0.1445	-0.3203	.
4933411E06Rik	ENSMUSG00000099608.3	lncRNA	chr1_50150000	0	0	0	0.2521	0.0032	-0.2489	.
4933411E08Rik	ENSMUSG00000112500.3	lncRNA	chr10_117750000	0.0145	0.001	-0.0192	0.73	0.4329	-0.2972	.
4933411G06Rik	ENSMUSG00000062224.8	lncRNA	chr10_51600000	0	0	0	0.2965	0.0692	-0.2273	.
4933411K16Rik	ENSMUSG00000090369.4	protein_coding	chr19_42000000	1.5059	0.9538	-0.359	0.9647	0.8814	-0.0833	.
4933411O13Rik	ENSMUSG00000045178.12	lncRNA	chr16_66650000	0	0	0	0.0657	0.2798	0.2141	.
4933412E12Rik	ENSMUSG00000112627.4	lncRNA	chr10_116800000	0.1804	0.312	0.1526	0.7601	0.5305	-0.2296	.
4933412E24Rik	ENSMUSG00000071749.4	protein_coding	chr15_59850000	0	0	0	0.4515	0.4161	-0.0354	.
4933412O06Rik	ENSMUSG00000113960.3	lncRNA	chr13_16000000	0.002	0.0007	-0.0019	0.4902	0.2805	-0.2097	.
4933413C19Rik	ENSMUSG00000089952.3	lncRNA	chr19_28550000	0.4664	0.0361	-0.5012	0.8487	0.861	0.0123	.
4933413L06Rik	ENSMUSG00000079048.9	lncRNA	chr13_117800000	0	0	0	0.042	0.0023	-0.0398	.
4933414I15Rik	ENSMUSG00000072983.5	protein_coding	chr11_50800000	0	0	0	0.7768	0.5393	-0.2375	.
4933415A04Rik	ENSMUSG00000045877.3	lncRNA	chr11_43450000	0.0928	2.7381	1.7743	0.7248	0.8093	0.0845	.
4933416E03Rik	ENSMUSG00000085198.3	lncRNA	chr2_159750000	0	0	0	0.5123	0.2734	-0.2389	.
4933416E14Rik	ENSMUSG00000137167.2	lncRNA	chrX_10300000	0	0	0	0.4775	0.6158	0.1382	.
4933416I08Rik	ENSMUSG00000079593.12	protein_coding	chrX_52550000	0	0.0007	0.001	0.8209	0.5234	-0.2975	.
4933416M07Rik	ENSMUSG00000097262.5	lncRNA	chr8_27600000	0.0519	0	-0.073	0.8543	0.6533	-0.201	.
4933416O17Rik	ENSMUSG00000113802.3	lncRNA	chr13_70100000	0	0.0006	0.0008	0.7496	0.4242	-0.3254	.
4933417C20Rik	ENSMUSG00000131911.1	lncRNA	chr1_160000000	0	0	0	0.4754	0.6629	0.1875	.
4933417D19Rik	ENSMUSG00000097637.3	lncRNA	chr8_123950000	0.1423	0.0109	-0.1763	0.9739	0.9707	-0.0032	.
4933417E11Rik	ENSMUSG00000101848.3	lncRNA	chr1_72050000	0.002	0.0026	0.0008	0.5761	0.6849	0.1088	.
4933417O13Rik	ENSMUSG00000101360.4	lncRNA	chr7_142850000	0.0036	0	-0.0051	0.9743	0.6581	-0.3163	.
4933421A08Rik	ENSMUSG00000086443.3	lncRNA	chr4_122850000	0.0767	0.2024	0.1592	0.7687	0.7424	-0.0263	.
4933421D24Rik	ENSMUSG00000110410.2	lncRNA	chr8_78000000	0	0	0	0.5749	0.4386	-0.1364	.
4933421I07Rik	ENSMUSG00000030463.6	protein_coding	chr7_42050000	0.1328	0	-0.1798	0.3748	0.0369	-0.3379	.
4933421O10Rik	ENSMUSG00000144194.3	lncRNA	chr4_33000000	0.1824	4.1282	2.1168	0.7031	0.8816	0.1784	.
4933422A05Rik	ENSMUSG00000111746.3	lncRNA	chr9_35150000	0	0	0	0.7461	0.8153	0.0692	.
4933424G05Rik	ENSMUSG00000117450.3	lncRNA	chr18_15100000	0.0144	0.0043	-0.0145	0.7668	0.6967	-0.0701	.
4933424G06Rik	ENSMUSG00000102416.5	protein_coding	chr1_36750000	0.0035	0.0093	0.0083	0.9723	0.9278	-0.0445	.
4933424H11Rik	ENSMUSG00000105527.3	lncRNA	chr3_128450000	0	0	0	0.2098	0.0253	-0.1845	.
4933424L21Rik	ENSMUSG00000085719.3	lncRNA	chr11_57500000	0	0	0	0.8335	0.9031	0.0696	.
4933424M12Rik	ENSMUSG00000087289.5	lncRNA	chr4_107600000	0	0.053	0.0746	0.8861	0.9004	0.0142	.
4933425B07Rik	ENSMUSG00000115665.2	lncRNA	chr14_46800000	0	0	0	0.8203	0.4518	-0.3684	.
4933425D22Rik	ENSMUSG00000107164.3	lncRNA	chr5_149350000	0.6772	1.5709	0.6162	0.8171	0.6933	-0.1237	.
4933426B08Rik	ENSMUSG00000116644.4	lncRNA	chr17_7050000	0	0	0	0.9296	0.8887	-0.0409	.
4933426K07Rik	ENSMUSG00000086933.2	lncRNA	chr11_57500000	0	0	0	0.8335	0.9031	0.0696	.
4933427D06Rik	ENSMUSG00000055403.15	lncRNA	chr6_89050000	0.9526	0.0064	-0.9562	0.8397	0.6346	-0.2052	.
4933427D14Rik	ENSMUSG00000020807.16	protein_coding	chr11_72000000	0.0132	0.0103	-0.0041	0.9302	0.8275	-0.1027	.
4933427D14Rik	ENSMUSG00000107877.3	protein_coding	chr11_72000000	0.3062	0.072	-0.285	0.9302	0.8275	-0.1027	.
4933427E11Rik	ENSMUSG00000044276.4	lncRNA	chr15_74550000	0.66	0.9142	0.2056	0.8495	0.6781	-0.1714	.
4933427E13Rik	ENSMUSG00000033015.19	lncRNA	chr11_25150000	0	0.0002	0.0003	0.4251	0.1677	-0.2573	.
4933427G23Rik	ENSMUSG00000086697.4	lncRNA	chr5_24000000	0	0.0338	0.0479	0.8887	0.9511	0.0624	.
4933427I04Rik	ENSMUSG00000073761.4	lncRNA	chr4_123750000	0	0	0	0.8234	0.6891	-0.1343	.
4933427I22Rik	ENSMUSG00000085928.3	lncRNA	chr4_139650000	0	0.0012	0.0017	0.9795	0.9191	-0.0604	.
4933427J07Rik	ENSMUSG00000087267.3	lncRNA	chr2_128750000	0	0	0	0.8675	0.7673	-0.1002	.
4933428C19Rik	ENSMUSG00000086355.3	lncRNA	chr4_40450000	0.004	0	-0.0058	0.6314	0.3534	-0.278	.
4933428G20Rik	ENSMUSG00000047988.3	lncRNA	chr11_97350000	0.0345	0.0085	-0.0367	0.9914	0.9986	0.0071	.
4933428M09Rik	ENSMUSG00000042525.6	protein_coding	chrX_138050000	0	0	0	0.261	0.2219	-0.0391	.
4933428P19Rik	ENSMUSG00000105203.2	lncRNA	chr10_62400000	0	0.1795	0.2382	0.8883	0.9229	0.0345	.
4933429H19Rik	ENSMUSG00000097786.5	lncRNA	chr3_30800000	1.5151	0.3018	-0.9501	0.7218	0.4905	-0.2313	.
4933429K18Rik	ENSMUSG00000122423.1	lncRNA	chr19_45700000	0	0	0	0.9608	0.9752	0.0144	.
4933429O19Rik	ENSMUSG00000115008.4	lncRNA	chr14_49100000	0	0	0	0.66	0.5467	-0.1133	.
4933430A20Rik	ENSMUSG00000110116.3	lncRNA	chr8_36600000	0	0	0	0.7121	0.8309	0.1188	.
4933430H16Rik	ENSMUSG00000109106.3	lncRNA	chr7_82550000	0	0	0	0.6531	0.5508	-0.1023	.
4933430I17Rik	ENSMUSG00000058046.2	protein_coding	chr4_62450000	0.0927	0.1843	0.1161	0.7442	0.8909	0.1466	.
4933430L12Rik	ENSMUSG00000108523.2	lncRNA	chr7_24900000	0.1193	0	-0.1626	0.9781	0.832	-0.1461	.
4933430M04Rik	ENSMUSG00000086892.3	lncRNA	chr11_24500000	0	0.0013	0.0019	0.484	0.24	-0.244	.
4933430N04Rik	ENSMUSG00000108848.3	lncRNA	chr8_9150000	0	0	0	0.5786	0.1769	-0.4017	.
4933431E20Rik	ENSMUSG00000086968.11	lncRNA	chr3_107800000	0.2907	0.9192	0.5723	0.7975	0.8939	0.0964	.
4933431G14Rik	ENSMUSG00000108709.3	lncRNA	chr6_72100000	0	0.0136	0.0196	0.7778	0.9595	0.1817	.
4933431J24Rik	ENSMUSG00000115774.3	lncRNA	chr14_118400000	0.0563	0.0139	-0.0591	0.5013	0.7141	0.2127	.
4933431K23Rik	ENSMUSG00000086451.11	lncRNA	chr8_78400000	0	0.0076	0.0109	0.6078	0.5286	-0.0791	.
4933431M02Rik	ENSMUSG00000107496.2	lncRNA	chr6_107600000	0	0.2303	0.299	0.0683	0.1553	0.087	.
4933432G23Rik	ENSMUSG00000111843.2	lncRNA	chr9_118250000	0	0	0	0.7244	0.4931	-0.2314	.
4933432I03Rik	ENSMUSG00000114980.3	lncRNA	chr14_103250000	0	0	0	0.4641	0.6064	0.1424	.
4933432I09Rik	ENSMUSG00000116557.3	lncRNA	chr16_18000000	0.0379	0.0292	-0.0122	0.9939	0.9755	-0.0184	.
4933432K03Rik	ENSMUSG00000108811.3	lncRNA	chr7_121050000	0.0022	0.424	0.5068	0.7234	0.385	-0.3384	.
4933433F19Rik	ENSMUSG00000097044.3	lncRNA	chr8_31050000	0	0	0	0.4754	0.2158	-0.2596	.
4933433G15Rik	ENSMUSG00000097021.9	lncRNA	chr9_75300000	0.601	0.1693	-0.4534	0.7258	0.8123	0.0865	.
4933433G19Rik	ENSMUSG00000114362.3	lncRNA	chr13_67100000	0	0.0025	0.0036	0.7502	0.3292	-0.421	.
4933433H22Rik	ENSMUSG00000117571.3	lncRNA	chr17_84350000	0	0.0272	0.0387	0.8967	0.8842	-0.0125	.
4933433N18Rik	ENSMUSG00000113227.3	lncRNA	chr13_50350000	0.0056	0.0004	-0.0075	0.7131	0.2116	-0.5015	Bottom
4933434E20Rik	ENSMUSG00000027942.18	protein_coding	chr3_89950000	1.4901	7.5532	1.7803	0.8707	0.9952	0.1244	.
4933434M16Rik	ENSMUSG00000020624.5	lncRNA	chr11_112700000	0.0455	0	-0.0641	0.6555	0.7408	0.0853	.
4933434P08Rik	ENSMUSG00000118103.3	lncRNA	chr18_54600000	0	0	0	0.4645	0.8582	0.3938	Top
4933435E02Rik	ENSMUSG00000117650.3	lncRNA	chr18_32200000	0.1894	0	-0.2502	0.7381	0.7965	0.0583	.
4933435F18Rik	ENSMUSG00000086978.3	lncRNA	chr4_124150000	0.0231	0	-0.0329	0.9098	0.6436	-0.2662	.
4933435G04Rik	ENSMUSG00000108345.2	lncRNA	chr7_72750000	0	0.0391	0.0553	0.7311	0.6824	-0.0486	.
4933436E23Rik	ENSMUSG00000103844.3	lncRNA	chr1_139300000	0	0	0	0.3726	0.4046	0.032	.
4933436H12Rik	ENSMUSG00000108924.3	lncRNA	chr7_68050000	0	0	0	0.6461	0.415	-0.2312	.
4933436I01Rik	ENSMUSG00000025288.2	protein_coding	chrX_66950000	0	0	0	0.2774	0.0307	-0.2467	.
4933436I20Rik	ENSMUSG00000100580.8	lncRNA	chr1_83600000	0.0007	0.0002	-0.0007	0.3367	0.19	-0.1467	.
4933438A12Rik	ENSMUSG00000086160.3	lncRNA	chr15_91450000	0	0	0	0.5894	0.5471	-0.0423	.
4933438B17Rik	ENSMUSG00000105490.3	lncRNA	chr5_127150000	0	0	0	0.5857	0.0587	-0.5271	Bottom
4933439C10Rik	ENSMUSG00000072893.14	lncRNA	chr11_59400000	1.8848	8.4418	1.7106	0.9408	0.9046	-0.0362	.
4933439J24Rik	ENSMUSG00000107322.3	lncRNA	chr5_134900000	0.0312	0	-0.0444	0.8974	0.9001	0.0026	.
4933439K11Rik	ENSMUSG00000085184.11	lncRNA	chr1_172350000	0.0416	0.0068	-0.0491	0.7007	0.51	-0.1906	.
4933439N14Rik	ENSMUSG00000109582.3	lncRNA	chr8_12550000	1.0438	0	-1.0313	0.8193	0.7434	-0.0759	.
4933440J02Rik	ENSMUSG00000097082.3	lncRNA	chr10_111400000	0.0159	0	-0.0228	0.5943	0.7439	0.1496	.
4933440M02Rik	ENSMUSG00000045928.4	lncRNA	chr7_124900000	0.0085	0	-0.0122	0.6328	0.2061	-0.4267	.
5031410I06Rik	ENSMUSG00000051940.3	protein_coding	chr5_26300000	0	0	0	0.6198	0.0031	-0.6168	Bottom
5031415H12Rik	ENSMUSG00000097282.2	lncRNA	chr17_71050000	0.6424	0.0484	-0.6477	0.6002	0.7036	0.1035	.
5031425E22Rik	ENSMUSG00000073147.6	lncRNA	chr5_23600000	0.7281	1.2164	0.359	0.6583	0.9052	0.2469	.
5031425F14Rik	ENSMUSG00000085129.4	lncRNA	chr2_166250000	0	0.0055	0.0079	0.9574	0.9755	0.0181	.
5031434C07Rik	ENSMUSG00000044574.6	lncRNA	chr6_112250000	0.1662	0	-0.2219	0.5342	0.5711	0.0368	.
5031434O11Rik	ENSMUSG00000097885.9	lncRNA	chr3_51450000	0.2156	1.4286	0.9984	0.8023	0.9767	0.1743	.
5031439G07Rik	ENSMUSG00000036046.15	protein_coding	chr15_84800000	4.0676	12.6262	1.427	0.9034	0.8699	-0.0335	.
5033403F01Rik	ENSMUSG00000096932.4	lncRNA	chr13_39150000	0.006	0.0713	0.0907	0.6766	0.4811	-0.1955	.
5033403H07Rik	ENSMUSG00000106352.7	lncRNA	chr5_53100000	0	0	0	0.708	0.5839	-0.1241	.
5033406O09Rik	ENSMUSG00000113769.3	lncRNA	chr12_111900000	0.273	0.0289	-0.3071	0.8283	0.7652	-0.0632	.
5033417F24Rik	ENSMUSG00000097251.4	lncRNA	chr1_92800000	0.8937	9.1127	2.4169	0.8773	0.9255	0.0483	.
5033421B08Rik	ENSMUSG00000112276.3	lncRNA	chr12_8600000	0.0068	0	-0.0098	0.8905	0.5473	-0.3433	.
5033425G24Rik	ENSMUSG00000120877.2	lncRNA	chr12_72800000	4.6726	0.78	-1.6722	0.7	0.9019	0.2019	.
5033426E14Rik	ENSMUSG00000110625.3	lncRNA	chr8_108550000	0	0	0	0.8657	0.4263	-0.4394	.
5033426O07Rik	ENSMUSG00000097097.4	lncRNA	chr8_121900000	0	0.1609	0.2152	0.9865	0.6955	-0.291	.
5033430I15Rik	ENSMUSG00000038152.7	lncRNA	chr13_46100000	0.0848	0.4535	0.4221	0.8924	0.8598	-0.0327	.
5330411J11Rik	ENSMUSG00000087455.9	lncRNA	chr2_59200000	3.0844	0.0131	-2.0114	0.7072	0.717	0.0098	.
5330411O13Rik	ENSMUSG00000108603.2	lncRNA	chr7_78450000	0	0	0	0.7087	0.6691	-0.0396	.
5330413D20Rik	ENSMUSG00000109258.3	lncRNA	chr8_10700000	0	0	0	0.824	0.8355	0.0115	.
5330413P13Rik	ENSMUSG00000086822.5	lncRNA	chr2_131650000	0.0456	0.0896	0.0594	0.7314	0.9107	0.1793	.
5330426L24Rik	ENSMUSG00000105501.2	lncRNA	chr14_54550000	0.0766	0	-0.1065	0.6629	0.7014	0.0386	.
5330429C05Rik	ENSMUSG00000085896.4	lncRNA	chr13_55050000	0.0351	0	-0.0498	0.9967	0.8587	-0.1381	.
5330434G04Rik	ENSMUSG00000087620.10	lncRNA	chrX_104350000	0.0037	0.133	0.1748	0.2733	0.5071	0.2338	.
5330438D12Rik	ENSMUSG00000052291.12	lncRNA	chr10_116450000	0.0217	0.0704	0.0671	0.6443	0.391	-0.2534	.
5330438I03Rik	ENSMUSG00000091393.2	lncRNA	chr1_166100000	0.0585	0.0084	-0.0701	0.5276	0.7056	0.1781	.
5330439A09Rik	ENSMUSG00000089708.2	lncRNA	chr8_55000000	0	0.0025	0.0037	0.3155	0.4261	0.1106	.
5330439B14Rik	ENSMUSG00000104234.3	lncRNA	chr6_142550000	0	0	0	0.3945	0.3426	-0.0518	.
5330439K02Rik	ENSMUSG00000097827.3	lncRNA	chr15_100350000	0.3905	0.4114	0.0215	0.9695	0.9843	0.0147	.
5330439M10Rik	ENSMUSG00000112470.3	lncRNA	chr10_117900000	0	0.0041	0.0059	0.8363	0.4968	-0.3395	.
5430400D12Rik	ENSMUSG00000097699.4	lncRNA	chr7_79550000	0.0495	0.1615	0.1463	0.8412	0.9065	0.0652	.
5430401F13Rik	ENSMUSG00000094113.8	protein_coding	chr6_131500000	0	0	0	0.2119	0.0076	-0.2043	.
5430402E10Rik	ENSMUSG00000044121.4	protein_coding	chrX_76950000	0	0	0	0.4007	0.2518	-0.1488	.
5430402O13Rik	ENSMUSG00000085776.11	lncRNA	chr6_50600000	0.0104	0.0771	0.0922	0.8005	0.9965	0.1961	.
5430402P08Rik	ENSMUSG00000109808.2	lncRNA	chr7_110950000	0	0	0	0.7448	0.6677	-0.0771	.
5430403N17Rik	ENSMUSG00000109761.3	lncRNA	chr8_36350000	0	0.0418	0.0591	0.6766	0.8562	0.1795	.
5430405H02Rik	ENSMUSG00000085741.11	lncRNA	chr2_156700000	0.2315	2.099	1.3314	0.8589	0.9793	0.1204	.
5430414B12Rik	ENSMUSG00000121164.1	lncRNA	chr1_191500000	0	0	0	0.8176	0.6021	-0.2156	.
5430416N02Rik	ENSMUSG00000097772.10	lncRNA	chr5_100550000	14.0603	6.4163	-1.022	0.7959	0.7151	-0.0808	.
5430421F17Rik	ENSMUSG00000110140.3	lncRNA	chr8_25750000	0.0137	0.0039	-0.0139	0.877	0.9162	0.0392	.
5430425K12Rik	ENSMUSG00000114554.3	lncRNA	chr13_81050000	0.0407	0	-0.0575	0.4597	0.4136	-0.0461	.
5430427G11Rik	ENSMUSG00000119988.2	lncRNA	chr10_43050000	0.0952	0.7286	0.6585	0.7613	0.8144	0.0531	.
5430427M07Rik	ENSMUSG00000085004.4	lncRNA	chr12_91000000	0	0	0	0.2734	0.2967	0.0234	.
5430427N15Rik	ENSMUSG00000104684.2	lncRNA	chr5_103500000	0	2.8633	1.9498	0.832	0.754	-0.078	.
5430431A17Rik	ENSMUSG00000108322.5	lncRNA	chr7_44100000	0.0425	1.0879	1.002	0.8227	0.7873	-0.0354	.
5430434I15Rik	ENSMUSG00000106002.2	lncRNA	chr3_38250000	0.0335	0	-0.0476	0.6276	0.7876	0.16	.
5430435K18Rik	ENSMUSG00000107387.3	lncRNA	chr5_151150000	0	0	0	0.5925	0.6514	0.0589	.
5430437J10Rik	ENSMUSG00000121619.2	lncRNA	chr15_5550000	0	0	0	0.6058	0.1905	-0.4153	.
5430440P10Rik	ENSMUSG00000115548.3	lncRNA	chr14_105650000	0.0499	0.0131	-0.0515	0.422	0.4282	0.0063	.
5530400C23Rik	ENSMUSG00000055594.7	protein_coding	chr6_133250000	0	0	0	0.1288	0.0457	-0.0831	.
5530401A14Rik	ENSMUSG00000020703.4	lncRNA	chr11_81750000	0.0049	0.0043	-0.0008	0.6626	0.2934	-0.3692	.
5530601H04Rik	ENSMUSG00000087174.10	lncRNA	chrX_104100000	0.5326	0.8884	0.3012	0.5572	0.6846	0.1274	.
5730403I07Rik	ENSMUSG00000099170.3	lncRNA	chr9_77300000	0.0062	0.0027	-0.0049	0.6522	0.5961	-0.0561	.
5730405O15Rik	ENSMUSG00000087424.4	lncRNA	chrX_12900000	1.5471	0.6761	-0.6037	0.694	0.8541	0.1601	.
5730409E04Rik	ENSMUSG00000073755.5	protein_coding	chr4_126500000	2.1747	0.8298	-0.7949	0.9609	0.7285	-0.2323	.
5730409N16Rik	ENSMUSG00000120512.2	lncRNA	chr12_73050000	0	0	0	0.8019	0.9188	0.1169	.
5730412P04Rik	ENSMUSG00000087553.3	lncRNA	chrX_135000000	0	0.0022	0.0032	0.6235	0.5111	-0.1124	.
5730414N17Rik	ENSMUSG00000116506.2	lncRNA	chr15_98750000	0.7497	9.38	2.5686	0.9741	0.9677	-0.0064	.
5730419F03Rik	ENSMUSG00000099364.4	lncRNA	chr1_78500000	0.5625	0	-0.6439	0.616	0.8391	0.223	.
5730420D15Rik	ENSMUSG00000097766.4	lncRNA	chr10_95250000	0.0723	0.0015	-0.0985	0.746	0.7513	0.0053	.
5730424H11Rik	ENSMUSG00000121082.1	lncRNA	chr15_89050000	0.3785	2.6928	1.4216	0.8908	0.8905	-0.0003	.
5730435O14Rik	ENSMUSG00000091370.3	lncRNA	chr10_41450000	0	0	0	0.9098	0.8836	-0.0262	.
5730437C11Rik	ENSMUSG00000085121.4	lncRNA	chr3_98800000	0.0277	0	-0.0395	0.4508	0.1843	-0.2665	.
5730455P16Rik	ENSMUSG00000057181.17	protein_coding	chr11_80250000	3.4334	13.9172	1.7505	0.8051	0.8934	0.0883	.
5730460C07Rik	ENSMUSG00000062046.3	lncRNA	chr3_153450000	0.0577	0	-0.081	0.6928	0.5941	-0.0987	.
5730471H19Rik	ENSMUSG00000087179.11	lncRNA	chr2_156650000	6.2898	2.7598	-0.9552	0.8626	0.967	0.1044	.
5730480H06Rik	ENSMUSG00000029089.9	protein_coding	chr5_48500000	0.5319	0.6794	0.1326	0.4268	0.3446	-0.0822	.
5730507C01Rik	ENSMUSG00000073197.10	protein_coding	chr12_18550000	2.2279	0.3979	-1.2073	0.8483	0.2665	-0.5818	Bottom
5730522E02Rik	ENSMUSG00000032985.16	protein_coding	chr11_25700000	0.0009	0.0007	-0.0002	0.3663	0.0959	-0.2704	.
5830405F06Rik	ENSMUSG00000103586.7	lncRNA	chr6_41000000	0	0	0	0.3608	0.1603	-0.2005	.
5830408C22Rik	ENSMUSG00000110148.4	lncRNA	chr8_25550000	0.3716	4.4899	2.0009	0.8862	0.7342	-0.152	.
5830416I19Rik	ENSMUSG00000106219.3	lncRNA	chr5_64200000	0.0267	0	-0.038	0.6152	0.7862	0.171	.
5830418P13Rik	ENSMUSG00000086236.11	lncRNA	chr9_103300000	0.2097	0.0017	-0.2722	0.89	0.7951	-0.095	.
5830428M24Rik	ENSMUSG00000113035.4	lncRNA	chr12_69500000	0.0178	0.0034	-0.0207	0.795	0.8565	0.0615	.
5830432E09Rik	ENSMUSG00000097471.11	lncRNA	chr7_135200000	0.0102	0	-0.0146	0.8229	0.7826	-0.0402	.
5830444B04Rik	ENSMUSG00000084803.10	lncRNA	chr4_155500000	0.019	0	-0.0271	0.9606	0.6828	-0.2778	.
5830448L01Rik	ENSMUSG00000115007.4	lncRNA	chr14_34350000	4.3515	6.2207	0.4322	0.7785	0.7446	-0.0339	.
5830454E08Rik	ENSMUSG00000052658.6	lncRNA	chr9_120400000	2.1751	4.9136	0.8972	0.9042	0.8275	-0.0767	.
5830468F06Rik	ENSMUSG00000098322.4	lncRNA	chr8_15050000	0.1412	0	-0.1906	0.8771	0.7144	-0.1627	.
5830487J09Rik	ENSMUSG00000104830.2	lncRNA	chr5_123500000	1.5262	0.3884	-0.8636	0.9488	0.9991	0.0503	.
5930403N24Rik	ENSMUSG00000046463.7	lncRNA	chr10_37000000	0.0294	2.5831	1.7994	0.445	0.6893	0.2443	.
5930411N13Rik	ENSMUSG00000104970.3	lncRNA	chr5_110350000	0.4581	0.2001	-0.2809	0.7341	0.7672	0.0331	.
5930430L01Rik	ENSMUSG00000106951.2	lncRNA	chr5_148900000	0.683	1.4674	0.5519	0.8474	0.7106	-0.1368	.
5930435M05Rik	ENSMUSG00000108861.2	lncRNA	chr7_82850000	0.0081	0.0039	-0.0061	0.5551	0.7103	0.1552	.
5930438M14Rik	ENSMUSG00000114590.3	lncRNA	chr13_101300000	0	0.0032	0.0046	0.4264	0.6171	0.1907	.
6030440G07Rik	ENSMUSG00000113056.2	lncRNA	chr12_110950000	0	0.0033	0.0048	0.8951	0.8742	-0.0209	.
6030442E23Rik	ENSMUSG00000100664.3	lncRNA	chr7_70850000	0	0	0	0.366	0.3531	-0.0129	.
6030442K20Rik	ENSMUSG00000097760.4	lncRNA	chr1_132350000	0.1944	0.1052	-0.1119	0.8436	0.952	0.1084	.
6030443J06Rik	ENSMUSG00000097207.10	lncRNA	chr5_22850000	0.0268	0.0489	0.0306	0.4824	0.4006	-0.0818	.
6030445D17Rik	ENSMUSG00000066178.5	lncRNA	chr4_136150000	0.5279	0.0276	-0.5724	0.9317	0.9896	0.058	.
6030452D12Rik	ENSMUSG00000054069.10	lncRNA	chr8_107200000	0	0	0	0.8974	0.7687	-0.1287	.
6030458C11Rik	ENSMUSG00000022195.8	protein_coding	chr15_12800000	10.0677	10.0889	0.0028	0.7097	0.6953	-0.0143	.
6030466F02Rik	ENSMUSG00000110599.2	lncRNA	chr8_124450000	0.0835	0	-0.1157	0.968	0.951	-0.017	.
6030468B19Rik	ENSMUSG00000025573.5	protein_coding	chr11_117650000	0.0345	0	-0.049	0.9797	0.9943	0.0146	.
6030469F06Rik	ENSMUSG00000121864.2	lncRNA	chr12_31200000	0	0	0	0.7499	0.8065	0.0566	.
6030471H07Rik	ENSMUSG00000085217.3	lncRNA	chr4_83900000	0	0	0	0.6882	0.5816	-0.1066	.
6030498E09Rik	ENSMUSG00000051361.8	protein_coding	chrX_37850000	0	0.0018	0.0026	0.4401	0.5314	0.0913	.
6230400D17Rik	ENSMUSG00000097577.5	lncRNA	chr14_20750000	0.8889	0.4687	-0.363	0.9768	0.9439	-0.0329	.
6230426M11Rik	ENSMUSG00000120051.2	lncRNA	chr12_104700000	2.312	7.0315	1.2779	0.7906	0.6794	-0.1112	.
6330403K07Rik	ENSMUSG00000018451.8	protein_coding	chr11_70900000	0.7917	282.316	7.3049	0.6166	0.8015	0.1849	.
6330403L08Rik	ENSMUSG00000075585.5	lncRNA	chr5_138950000	5.0212	2.4271	-0.8131	0.8485	0.8894	0.0409	.
6330408M09Rik	ENSMUSG00000116733.4	lncRNA	chr16_22900000	2.2954	3.3762	0.4092	0.8	0.8269	0.0269	.
6330409D20Rik	ENSMUSG00000009551.4	lncRNA	chr2_32600000	0	0	0	0.9662	0.9935	0.0273	.
6330411D24Rik	ENSMUSG00000110067.3	protein_coding	chr4_142650000	0	0	0.0001	0.8129	0.1817	-0.6312	Bottom
6330415G19Rik	ENSMUSG00000117322.3	lncRNA	chr17_23750000	0.5021	0.1298	-0.4108	0.7317	0.6854	-0.0463	.
6330418K02Rik	ENSMUSG00000085227.4	lncRNA	chr5_138250000	1.7524	13.183	2.3654	0.8183	0.6502	-0.1681	.
6330420H09Rik	ENSMUSG00000109898.3	lncRNA	chr7_135500000	0	0.0022	0.0032	0.7362	0.6324	-0.1038	.
6330549D23Rik	ENSMUSG00000121819.2	lncRNA	chr3_96500000	0.1235	0.0955	-0.0364	0.8709	0.8861	0.0152	.
6330562C20Rik	ENSMUSG00000093424.6	lncRNA	chr3_95200000	0.3992	0.604	0.1971	0.9094	0.9847	0.0753	.
6330576A10Rik	ENSMUSG00000115821.3	lncRNA	chr14_100650000	0.0058	0.0829	0.1065	0.3654	0.5521	0.1868	.
6430548M08Rik	ENSMUSG00000031824.16	protein_coding	chr8_120850000	0.0301	2.8077	1.8862	0.9833	0.9297	-0.0536	.
6430550D23Rik	ENSMUSG00000074646.12	protein_coding	chr2_155800000	0.0418	0.191	0.1931	0.8995	0.9658	0.0664	.
6430553K19Rik	ENSMUSG00000116755.3	lncRNA	chr16_47900000	0	0.0007	0.0009	0.2486	0.0828	-0.1658	.
6430562O15Rik	ENSMUSG00000097828.3	lncRNA	chr13_99500000	0.0326	0.0197	-0.0181	0.8616	0.8095	-0.0521	.
6430571L13Rik	ENSMUSG00000037977.7	protein_coding	chr9_107200000	0.1775	0.5883	0.4317	0.9773	0.8285	-0.1488	.
6430573P05Rik	ENSMUSG00000102545.3	lncRNA	chr3_79200000	0.0342	0.1634	0.1698	0.5469	0.7008	0.1539	.
6430584L05Rik	ENSMUSG00000108228.4	lncRNA	chr6_55350000	0.0425	0.9473	0.9014	0.7961	0.8214	0.0253	.
6430590A07Rik	ENSMUSG00000097583.4	lncRNA	chr3_40800000	0.2697	0.1509	-0.1417	0.5977	0.6026	0.0049	.
6430710C18Rik	ENSMUSG00000085427.9	lncRNA	chr2_72600000	0.0053	0	-0.0076	0.7745	0.8689	0.0944	.
6530401F13Rik	ENSMUSG00000091947.4	lncRNA	chr12_81550000	0	0.0431	0.0608	0.588	0.8135	0.2255	.
6530402F18Rik	ENSMUSG00000079499.11	lncRNA	chr2_29100000	0.0683	3.871	2.1889	0.9985	0.9819	-0.0167	.
6530403H02Rik	ENSMUSG00000098097.10	lncRNA	chr3_120500000	0.0011	0	-0.0016	0.4159	0.072	-0.3439	.
6530409C15Rik	ENSMUSG00000043340.5	lncRNA	chr6_28250000	0.0074	0.0005	-0.0098	0.564	0.5066	-0.0573	.
6530411M01Rik	ENSMUSG00000097049.3	lncRNA	chr17_9350000	0.0031	0.2084	0.2686	0.6928	0.8037	0.111	.
6530413G14Rik	ENSMUSG00000111856.3	lncRNA	chr9_22000000	0.0173	0.0055	-0.0168	0.9316	0.8939	-0.0378	.
6530437J22Rik	ENSMUSG00000109111.3	lncRNA	chr7_44600000	0.4068	0.283	-0.1329	0.9918	0.8701	-0.1218	.
6720407P12Rik	ENSMUSG00000121226.1	lncRNA	chr11_69650000	1.2534	62.0012	4.8052	0.9807	0.9594	-0.0212	.
6720427I07Rik	ENSMUSG00000097375.5	lncRNA	chr13_48650000	2.4849	0.6889	-1.045	0.806	0.8933	0.0872	.
6720468P15Rik	ENSMUSG00000117655.4	lncRNA	chr19_57450000	0.0602	0	-0.0843	0.9275	0.7536	-0.1739	.
6720470G18Rik	ENSMUSG00000120018.2	lncRNA	chr13_112550000	0.9599	0.3713	-0.5152	0.6438	0.7776	0.1338	.
6720473M11Rik	ENSMUSG00000129763.1	lncRNA	chr16_3400000	0.0203	0.01	-0.0146	0.8224	0.1882	-0.6342	Bottom
6720483E21Rik	ENSMUSG00000097934.3	lncRNA	chr1_20950000	0.3087	3.0323	1.6235	0.6239	0.6686	0.0448	.
6820408C15Rik	ENSMUSG00000032680.12	protein_coding	chr2_152250000	0.0362	0.1537	0.155	0.919	0.7858	-0.1332	.
6820426E19Rik	ENSMUSG00000108020.2	lncRNA	chr6_117450000	0	0	0	0.6622	0.383	-0.2793	.
6820445E23Rik	ENSMUSG00000120289.2	lncRNA	chr11_26300000	1.5122	4.1216	1.0277	0.3782	0.3194	-0.0588	.
7330404K18Rik	ENSMUSG00000084942.3	lncRNA	chr14_20400000	0.2031	0.0132	-0.2479	0.8584	0.8615	0.003	.
7420700N18Rik	ENSMUSG00000109915.2	lncRNA	chr8_31850000	0	0.0227	0.0324	0.4541	0.2713	-0.1829	.
7420701I03Rik	ENSMUSG00000113620.2	lncRNA	chr12_11100000	0	0	0	0.6716	0.2097	-0.4619	Bottom
7530414M10Rik	ENSMUSG00000116338.2	lncRNA	chr15_83050000	0	0	0	0.9666	0.8285	-0.1381	.
7530416G11Rik	ENSMUSG00000096607.2	protein_coding	chr15_85350000	0	0.0157	0.0225	0.92	0.9634	0.0434	.
7630403G23Rik	ENSMUSG00000098758.3	lncRNA	chr9_33950000	0	0	0	0.4201	0.2953	-0.1248	.
8030423F21Rik	ENSMUSG00000052295.6	lncRNA	chr5_52700000	0.0362	0.0028	-0.0474	0.7432	0.5554	-0.1879	.
8030423J24Rik	ENSMUSG00000021600.6	lncRNA	chr13_71000000	0	0.8128	0.8582	0.6362	0.6659	0.0297	.
8030442B05Rik	ENSMUSG00000102674.3	lncRNA	chr2_11350000	0.017	0.0004	-0.0238	0.6571	0.7869	0.1298	.
8030443G20Rik	ENSMUSG00000086483.2	lncRNA	chr4_108800000	0	0	0	0.6405	0.7672	0.1267	.
8030451A03Rik	ENSMUSG00000073821.13	lncRNA	chr4_63900000	0	0.0107	0.0153	0.5412	0.7975	0.2563	Top
8030451O07Rik	ENSMUSG00000116769.2	lncRNA	chr16_72000000	0	0.0052	0.0075	0.1973	0.2643	0.0671	.
8030453O22Rik	ENSMUSG00000085058.4	lncRNA	chr6_39500000	0.2141	0.0219	-0.2486	0.8216	0.8914	0.0698	.
8030455M16Rik	ENSMUSG00000110507.2	lncRNA	chr8_110750000	0	0	0	0.8838	0.5578	-0.3261	.
8030456M14Rik	ENSMUSG00000117768.4	lncRNA	chr19_53350000	2.654	1.17	-0.7518	0.7056	0.78	0.0744	.
8030474K03Rik	ENSMUSG00000046774.18	protein_coding	chrX_100800000	6.4262	0	-2.8926	0.8686	0.8692	0.0006	.
8430419K02Rik	ENSMUSG00000085743.3	lncRNA	chr11_18800000	0	0.0802	0.1114	0.4516	0.7687	0.3171	Top
8430422H06Rik	ENSMUSG00000117633.2	lncRNA	chr18_14400000	0	0	0	0.7699	0.6107	-0.1592	.
8430423G03Rik	ENSMUSG00000079069.3	lncRNA	chr5_148850000	0	0.0168	0.0241	0.8435	0.7305	-0.113	.
8430426J06Rik	ENSMUSG00000115970.4	lncRNA	chr15_81150000	0	0	0	0.8675	0.9583	0.0908	.
8430429K09Rik	ENSMUSG00000034587.11	lncRNA	chr11_3400000	0.1629	0.5889	0.4503	0.8391	0.9314	0.0923	.
8430430B14Rik	ENSMUSG00000117431.3	lncRNA	chr17_84250000	0.1404	0	-0.1896	0.8647	0.9519	0.0872	.
8430432A02Rik	ENSMUSG00000041878.4	lncRNA	chr1_43100000	0	1.7665	1.468	0.6897	0.7848	0.0951	.
8430436N08Rik	ENSMUSG00000086070.3	lncRNA	chr4_7550000	0	0	0	0.3016	0.102	-0.1995	.
8430437L04Rik	ENSMUSG00000085252.2	lncRNA	chr2_72500000	0	0	0	0.8728	0.9591	0.0863	.
9030204H09Rik	ENSMUSG00000086449.3	lncRNA	chr2_35700000	0.0397	0	-0.0561	0.7744	0.8181	0.0437	.
9030404E10Rik	ENSMUSG00000116660.4	lncRNA	chr16_29850000	0.0664	0	-0.0927	0.7875	0.9175	0.13	.
9030407P20Rik	ENSMUSG00000097343.4	lncRNA	chr7_120250000	0.3505	8.948	2.8809	0.6922	0.653	-0.0391	.
9030616G12Rik	ENSMUSG00000097691.3	lncRNA	chr10_128800000	0	0	0	0.4764	0.5706	0.0942	.
9030619P08Rik	ENSMUSG00000121494.2	lncRNA	chr15_75300000	0	0	0	0.9533	0.4452	-0.5081	Bottom
9030622O22Rik	ENSMUSG00000086141.10	lncRNA	chr2_147750000	0.0017	0	-0.0025	0.4722	0.1436	-0.3286	.
9030624G23Rik	ENSMUSG00000073158.5	protein_coding	chr12_24050000	0.2101	0.044	-0.213	0.8958	0.1489	-0.7468	Bottom
9030625G05Rik	ENSMUSG00000118384.3	lncRNA	chr18_75100000	0.1205	0.0054	-0.1564	0.6862	0.8215	0.1353	.
9130004C02Rik	ENSMUSG00000120169.2	lncRNA	chr9_25150000	0.5437	3.6566	1.5929	0.5614	0.7339	0.1725	.
9130008F23Rik	ENSMUSG00000054951.4	protein_coding	chr17_41150000	0.4538	0.5071	0.0519	0.3928	0.3005	-0.0923	.
9130015A21Rik	ENSMUSG00000113985.3	lncRNA	chr12_35700000	0.0162	0.0039	-0.0176	0.3909	0.3811	-0.0098	.
9130015G15Rik	ENSMUSG00000108950.2	lncRNA	chr7_48750000	0	0.0022	0.0032	0.7323	0.9331	0.2008	.
9130015L21Rik	ENSMUSG00000086653.3	lncRNA	chr2_159850000	0.0044	0	-0.0064	0.5187	0.3148	-0.2039	.
9130016M20Rik	ENSMUSG00000118366.2	lncRNA	chr19_31900000	0	0	0	0.5932	0.3761	-0.2171	.
9130017K11Rik	ENSMUSG00000055134.7	lncRNA	chr11_67800000	0.0191	0.0191	0	0.8856	0.8645	-0.0211	.
9130019P16Rik	ENSMUSG00000073067.12	lncRNA	chr6_54250000	0.0021	0.0033	0.0017	0.7259	0.921	0.1951	.
9130024F11Rik	ENSMUSG00000087022.7	lncRNA	chr1_57050000	0	0.1315	0.1782	0.5469	0.4077	-0.1393	.
9130204K15Rik	ENSMUSG00000086474.4	lncRNA	chr11_79750000	0.0123	0.0012	-0.0159	0.9629	0.9804	0.0175	.
9130209A04Rik	ENSMUSG00000117602.3	lncRNA	chr18_47600000	0	0	0	0.5078	0.617	0.1092	.
9130213A22Rik	ENSMUSG00000097386.3	lncRNA	chr11_69000000	0	1.6335	1.397	0.9904	0.9659	-0.0245	.
9130221F21Rik	ENSMUSG00000108356.2	lncRNA	chr6_71950000	0	0	0	0.8639	0.9217	0.0579	.
9130221H12Rik	ENSMUSG00000090330.4	lncRNA	chr7_24900000	6.033	27.5683	2.0222	0.9781	0.832	-0.1461	.
9130227L01Rik	ENSMUSG00000099950.3	lncRNA	chr1_56000000	0.0033	0	-0.0047	0.416	0.3106	-0.1054	.
9130230L23Rik	ENSMUSG00000054598.16	lncRNA	chr5_66100000	0.0417	0	-0.0589	0.752	0.8072	0.0552	.
9130230N09Rik	ENSMUSG00000092626.4	lncRNA	chr11_22800000	0.1684	0.0814	-0.1117	0.9013	0.6765	-0.2247	.
9130401M01Rik	ENSMUSG00000101892.2	protein_coding	chr15_57850000	5.9454	2.8301	-0.8587	0.8309	0.8732	0.0423	.
9130410C08Rik	ENSMUSG00000085323.3	lncRNA	chr4_114650000	0	0	0	0.6672	0.4587	-0.2085	.
9130604C24Rik	ENSMUSG00000105851.2	lncRNA	chr5_137500000	0.5435	3.5973	1.5746	0.9356	0.9166	-0.019	.
9230009I02Rik	ENSMUSG00000072982.3	lncRNA	chr11_50950000	0	0	0	0.7725	0.4743	-0.2981	.
9230020A06Rik	ENSMUSG00000072753.14	lncRNA	chr11_71400000	0.0181	0.0014	-0.0239	0.6882	0.5635	-0.1248	.
9230102K24Rik	ENSMUSG00000112398.3	lncRNA	chr10_110400000	0	0	0	0.3315	0.226	-0.1055	.
9230104M06Rik	ENSMUSG00000097100.3	lncRNA	chr12_112950000	0.0747	0.0277	-0.0646	0.7229	0.8997	0.1768	.
9230105E05Rik	ENSMUSG00000090191.3	lncRNA	chr10_120200000	0	11.3235	3.6233	0.686	0.8098	0.1238	.
9230106D20Rik	ENSMUSG00000042940.10	lncRNA	chr10_19500000	0	0	0	0.7277	0.5852	-0.1425	.
9230109A22Rik	ENSMUSG00000051237.9	lncRNA	chr15_25100000	0.0012	0	-0.0017	0.4218	0.3535	-0.0683	.
9230110F11Rik	ENSMUSG00000110497.2	lncRNA	chr8_105400000	0	0	0	0.5228	0.2235	-0.2992	.
9230111E07Rik	ENSMUSG00000087624.3	lncRNA	chr2_167600000	0.212	0.1587	-0.0649	0.9974	0.9333	-0.0641	.
9230112D13Rik	ENSMUSG00000021797.3	protein_coding	chr14_34200000	0	0	0	0.7165	0.8354	0.1189	.
9230112E08Rik	ENSMUSG00000070461.4	lncRNA	chr2_180600000	2.009	6.9054	1.3935	0.9306	0.7405	-0.1901	.
9230112J17Rik	ENSMUSG00000111761.4	lncRNA	chr9_60450000	0.0194	0.0049	-0.0206	0.9622	0.8644	-0.0978	.
9230114J08Rik	ENSMUSG00000105385.2	lncRNA	chr3_96900000	0	0	0	0.8053	0.61	-0.1953	.
9230114K14Rik	ENSMUSG00000097145.8	lncRNA	chr5_52400000	0.1481	0.1867	0.0476	0.6784	0.4723	-0.2061	.
9230116L04Rik	ENSMUSG00000112489.3	lncRNA	chr12_79150000	0.1936	0.0155	-0.2331	0.7681	0.8482	0.0801	.
9230116N13Rik	ENSMUSG00000097403.4	lncRNA	chr1_136300000	0.5525	1.3196	0.5793	0.7267	0.9188	0.1921	.
9230117E06Rik	ENSMUSG00000089874.2	lncRNA	chr16_22300000	0.0537	0.0077	-0.0644	0.8734	0.9144	0.0409	.
9330020H09Rik	ENSMUSG00000091050.4	lncRNA	chr15_98450000	4.991	3.5701	-0.3906	0.8781	0.9547	0.0766	.
9330104G04Rik	ENSMUSG00000097842.4	lncRNA	chr7_16600000	0.399	5.1164	2.1283	0.8156	0.8788	0.0631	.
9330111N05Rik	ENSMUSG00000097098.10	lncRNA	chr13_81150000	0.0041	0.0059	0.0025	0.3241	0.2792	-0.045	.
9330117O12Rik	ENSMUSG00000118154.3	lncRNA	chr18_54700000	0	0.0264	0.0377	0.395	0.8761	0.4811	Top
9330118I20Rik	ENSMUSG00000108242.2	lncRNA	chr6_63200000	0	0.0318	0.0451	0.3044	0.3611	0.0567	.
9330121J05Rik	ENSMUSG00000103502.2	lncRNA	chr3_62200000	0.228	3.7243	1.9438	0.4108	0.4785	0.0678	.
9330133O14Rik	ENSMUSG00000121107.1	lncRNA	chr8_123150000	2.9672	12.2743	1.7424	0.9413	0.9666	0.0253	.
9330136K24Rik	ENSMUSG00000097781.3	lncRNA	chr17_21750000	0.1072	0.1166	0.0122	0.6184	0.4776	-0.1407	.
9330151L19Rik	ENSMUSG00000097061.4	lncRNA	chr12_69200000	1.6883	10.4316	2.0883	0.7003	0.8501	0.1498	.
9330154J02Rik	ENSMUSG00000056031.16	lncRNA	chr9_85700000	0.0138	0.0567	0.0598	0.5207	0.4871	-0.0336	.
9330154K18Rik	ENSMUSG00000047807.11	lncRNA	chr15_57550000	0	0.0196	0.028	0.6862	0.8742	0.188	.
9330158H04Rik	ENSMUSG00000073154.13	lncRNA	chr6_36150000	0.003	0.0045	0.0021	0.5513	0.3885	-0.1628	.
9330159F19Rik	ENSMUSG00000004360.10	protein_coding	chr10_29050000	0.2459	6.2093	2.5326	0.4139	0.52	0.1061	.
9330160F10Rik	ENSMUSG00000072809.4	lncRNA	chr11_68950000	0.0601	1.7414	1.3707	0.9454	0.9839	0.0384	.
9330162012Rik	ENSMUSG00000086448.2	lncRNA	chr13_25100000	0.2172	0.0948	-0.1529	0.7978	0.7354	-0.0624	.
9330162B11Rik	ENSMUSG00000103577.2	lncRNA	chr1_187700000	0	0	0	0.4857	0.5022	0.0166	.
9330171B17Rik	ENSMUSG00000039133.10	lncRNA	chr7_79350000	0.0453	0.0158	-0.0413	0.9178	0.9498	0.0319	.
9330175E14Rik	ENSMUSG00000097194.5	lncRNA	chr8_95100000	0.0153	0.0101	-0.0073	0.9081	0.8172	-0.0909	.
9330175M20Rik	ENSMUSG00000101799.3	lncRNA	chr1_51300000	0	0.0008	0.0012	0.5886	0.5406	-0.0481	.
9330178D15Rik	ENSMUSG00000104553.2	lncRNA	chr3_155700000	0.0058	0	-0.0083	0.118	0.0312	-0.0868	.
9330179D12Rik	ENSMUSG00000097166.4	lncRNA	chr6_127100000	0.0026	0.0554	0.074	0.8018	0.6901	-0.1117	.
9330182O14Rik	ENSMUSG00000094112.3	protein_coding	chr15_39950000	0.0213	0	-0.0304	0.6535	0.5806	-0.0729	.
9330185C12Rik	ENSMUSG00000097648.3	lncRNA	chr1_113850000	0.0978	0	-0.1346	0.4143	0.06	-0.3544	.
9330188P03Rik	ENSMUSG00000115149.4	lncRNA	chr14_105850000	0	8.9576	3.3158	0.3749	0.6592	0.2843	Top
9330198I05Rik	ENSMUSG00000104904.3	lncRNA	chr5_108500000	0.0683	0.2007	0.1686	0.6701	0.5713	-0.0988	.
9330198N18Rik	ENSMUSG00000086405.3	lncRNA	chr2_30550000	0.0111	0	-0.0159	0.9316	0.9884	0.0569	.
9330199G10Rik	ENSMUSG00000114189.3	lncRNA	chr13_19650000	0	0.001	0.0014	0.5619	0.3336	-0.2283	.
9430002A10Rik	ENSMUSG00000062704.4	lncRNA	chr8_88900000	1.7951	2.6531	0.3862	0.7626	0.8085	0.0459	.
9430014N10Rik	ENSMUSG00000116360.3	lncRNA	chr15_93800000	0	0	0	0.5062	0.541	0.0348	.
9430015G10Rik	ENSMUSG00000059939.14	protein_coding	chr4_156200000	6.4373	12.509	0.8611	0.9486	0.7424	-0.2062	.
9430018G01Rik	ENSMUSG00000107709.2	lncRNA	chr6_43450000	0	0.042	0.0594	0.4491	0.2308	-0.2183	.
9430021M05Rik	ENSMUSG00000054457.8	lncRNA	chr2_162500000	0	0.0186	0.0265	0.5803	0.2188	-0.3615	.
9430024E24Rik	ENSMUSG00000085463.2	lncRNA	chr2_33600000	0	0	0	0.986	0.9751	-0.0109	.
9430037G07Rik	ENSMUSG00000097073.9	lncRNA	chr9_88450000	0.5408	0.3369	-0.2047	0.431	0.3022	-0.1288	.
9430038I01Rik	ENSMUSG00000040139.15	protein_coding	chr7_136950000	1.3221	1.1826	-0.0894	0.7691	0.5128	-0.2563	.
9430041J12Rik	ENSMUSG00000086155.10	lncRNA	chr7_4050000	0.0334	0.5693	0.6027	0.7064	0.3917	-0.3147	.
9430060I03Rik	ENSMUSG00000100632.2	lncRNA	chr1_92850000	0	0.0457	0.0645	0.8326	0.8014	-0.0312	.
9430065F17Rik	ENSMUSG00000097360.10	lncRNA	chr13_67700000	0.1102	0.7254	0.6361	0.5431	0.3246	-0.2185	.
9430069I07Rik	ENSMUSG00000094447.3	protein_coding	chr15_34300000	0.04	0.0047	-0.0499	0.6888	0.7517	0.0629	.
9430073C21Rik	ENSMUSG00000085479.3	lncRNA	chr11_67050000	0	0.0116	0.0166	0.6603	0.4543	-0.206	.
9430078K24Rik	ENSMUSG00000112765.3	lncRNA	chr12_79950000	0	0.1675	0.2234	0.9038	0.9928	0.0891	.
9430085M18Rik	ENSMUSG00000106164.4	lncRNA	chr5_101850000	0.046	0.001	-0.0634	0.7631	0.3663	-0.3968	.
9430091E24Rik	ENSMUSG00000084808.9	lncRNA	chr8_111850000	0.2399	0.3942	0.1692	0.7999	0.918	0.1181	.
9430093N23Rik	ENSMUSG00000085369.3	lncRNA	chr2_169050000	0	0	0	0.8995	0.4412	-0.4584	.
9530002B09Rik	ENSMUSG00000023263.4	protein_coding	chr4_122550000	0	0	0	0.3918	0.2097	-0.1821	.
9530004M14Rik	ENSMUSG00000119975.2	lncRNA	chr8_83100000	0.0921	0	-0.1271	0.3816	0.2729	-0.1087	.
9530014B07Rik	ENSMUSG00000113599.3	lncRNA	chr13_53750000	0	0	0	0.9537	0.4498	-0.5039	Bottom
9530018F02Rik	ENSMUSG00000112150.2	lncRNA	chr12_77250000	0.4151	2.3966	1.2632	0.5751	0.7308	0.1557	.
9530020I12Rik	ENSMUSG00000112041.3	lncRNA	chr12_11200000	0.0576	0	-0.0808	0.8492	0.4159	-0.4333	.
9530026F06Rik	ENSMUSG00000085447.3	lncRNA	chr1_61400000	0	0	0	0.5415	0.7252	0.1836	.
9530026P05Rik	ENSMUSG00000097462.10	lncRNA	chr6_93100000	0.0073	0.0004	-0.0099	0.6227	0.9775	0.3547	Top
9530034A14Rik	ENSMUSG00000105619.2	lncRNA	chr3_145100000	0.0819	0	-0.1136	0.5688	0.4223	-0.1465	.
9530034E10Rik	ENSMUSG00000086554.4	lncRNA	chr4_117850000	0	0	0	0.9226	0.87	-0.0526	.
9530036M11Rik	ENSMUSG00000087670.2	lncRNA	chr6_54100000	0	0	0	0.773	0.9312	0.1582	.
9530036O11Rik	ENSMUSG00000097726.9	lncRNA	chr5_28800000	0.0016	0.0002	-0.002	0.7532	0.3543	-0.399	.
9530046B11Rik	ENSMUSG00000086047.3	lncRNA	chr5_117250000	0.1007	0.1464	0.0587	0.8824	0.7672	-0.1152	.
9530051G07Rik	ENSMUSG00000085982.3	lncRNA	chrX_151850000	0.0647	0.2713	0.2558	0.4308	0.3491	-0.0817	.
9530052E02Rik	ENSMUSG00000096938.9	lncRNA	chr8_11100000	0.0063	0.0063	0	0.8178	0.7485	-0.0694	.
9530056K15Rik	ENSMUSG00000045345.9	lncRNA	chr5_143350000	0.2995	0.4249	0.1329	0.9456	0.8445	-0.1011	.
9530059O14Rik	ENSMUSG00000097736.10	lncRNA	chr9_122350000	0.0146	0.0009	-0.0196	0.8042	0.6085	-0.1957	.
9530062K07Rik	ENSMUSG00000108030.3	lncRNA	chr6_116150000	0.113	0.372	0.3018	0.7464	0.7731	0.0267	.
9530068E07Rik	ENSMUSG00000036275.14	protein_coding	chr11_52250000	14.177	145.974	3.2756	0.9576	0.9492	-0.0083	.
9530077C14Rik	ENSMUSG00000120262.2	lncRNA	chr4_138900000	0.0926	0.1902	0.1235	0.9983	0.9195	-0.0788	.
9530080O11Rik	ENSMUSG00000044125.9	lncRNA	chr4_95800000	0.0068	0.005	-0.0026	0.4436	0.5599	0.1163	.
9530082P21Rik	ENSMUSG00000097006.10	lncRNA	chr17_23950000	0.286	0.2715	-0.0163	0.9598	0.9324	-0.0275	.
9530097N15Rik	ENSMUSG00000106371.2	lncRNA	chr3_103950000	1.4222	0	-1.2763	0.521	0.8237	0.3028	Top
9630001P10Rik	ENSMUSG00000097825.7	lncRNA	chr5_45800000	0	0.0985	0.1355	0.418	0.5528	0.1348	.
9630002D21Rik	ENSMUSG00000114028.3	lncRNA	chr12_71600000	0.0037	0.0003	-0.0049	0.7183	0.896	0.1777	.
9630009A06Rik	ENSMUSG00000115012.3	lncRNA	chr15_30950000	0	0.003	0.0043	0.6637	0.6045	-0.0591	.
9630013A20Rik	ENSMUSG00000115529.3	lncRNA	chr14_84650000	0	0.0073	0.0105	0.3644	0.2375	-0.1269	.
9630013D21Rik	ENSMUSG00000059027.17	lncRNA	chr4_109500000	0.0123	0.3076	0.3692	0.4243	0.6792	0.2549	Top
9630013K17Rik	ENSMUSG00000086359.2	lncRNA	chr11_63850000	0.0437	0.0539	0.0142	0.768	0.6912	-0.0768	.
9630014M24Rik	ENSMUSG00000118257.3	lncRNA	chr18_38950000	0	0.0154	0.022	0.6567	0.9902	0.3335	Top
9630015K15Rik	ENSMUSG00000114284.2	lncRNA	chr14_64350000	0	0.1196	0.163	0.9595	0.8563	-0.1032	.
9630028B13Rik	ENSMUSG00000051295.10	lncRNA	chr1_185150000	0.0267	3.7641	2.2142	0.8207	0.7971	-0.0237	.
9630028H03Rik	ENSMUSG00000085631.2	lncRNA	chr2_135150000	0	0.0003	0.0005	0.2993	0.4978	0.1985	.
9630028I04Rik	ENSMUSG00000117916.4	lncRNA	chr17_27450000	11.3363	3.1332	-1.5776	0.9976	0.7235	-0.274	.
9630041A04Rik	ENSMUSG00000057710.8	lncRNA	chr9_101750000	0	0	0	0.545	0.6205	0.0755	.
9830004L10Rik	ENSMUSG00000099552.3	lncRNA	chr1_80200000	0.0116	0.0919	0.1102	0.6073	0.8146	0.2073	.
9830132P13Rik	ENSMUSG00000104763.4	lncRNA	chr3_127700000	0.011	0	-0.0158	0.6157	0.4537	-0.162	.
9830144P21Rik	ENSMUSG00000087528.3	lncRNA	chr2_129050000	0.1326	0.0067	-0.17	0.8999	0.8016	-0.0983	.
9830166K06Rik	ENSMUSG00000117763.3	lncRNA	chr19_8600000	0	0.0036	0.0051	0.879	0.6534	-0.2256	.
9930004E17Rik	ENSMUSG00000096052.4	lncRNA	chr14_26350000	0.0527	0.0742	0.0291	0.8643	0.9164	0.0521	.
9930012K11Rik	ENSMUSG00000044551.14	protein_coding	chr14_70350000	0.7173	1.3862	0.4746	0.9118	0.9132	0.0013	.
9930014A18Rik	ENSMUSG00000097493.4	lncRNA	chr15_60700000	1.212	3.9176	1.1526	0.5056	0.5857	0.0802	.
9930022D16Rik	ENSMUSG00000045065.8	protein_coding	chr11_109300000	0.1057	0.0127	-0.1268	0.636	0.7626	0.1266	.
9930038B18Rik	ENSMUSG00000042976.8	lncRNA	chr12_8900000	0.0092	0	-0.0132	0.95	0.8537	-0.0963	.
9930105H17Rik	ENSMUSG00000120936.1	lncRNA	chr5_15700000	0	0.0843	0.1168	0.3458	0.1172	-0.2286	.
9930111H07Rik	ENSMUSG00000100217.3	lncRNA	chr1_85650000	0.0087	0	-0.0124	0.7905	0.5202	-0.2704	.
9930111J21Rik1	ENSMUSG00000069893.11	protein_coding	chr11_48800000	0.0224	0	-0.032	0.4815	0.3583	-0.1231	.
9930111J21Rik2	ENSMUSG00000069892.10	protein_coding	chr11_48900000	0.0158	0	-0.0226	0.4369	0.5817	0.1448	.
A030001D20Rik	ENSMUSG00000110357.4	lncRNA	chr7_45250000	0.4807	2.4016	1.2	0.9894	0.9955	0.0062	.
A030003K21Rik	ENSMUSG00000113084.2	protein_coding	chr1_82900000	0	0	0	0.6571	0.5052	-0.1519	.
A030005K14Rik	ENSMUSG00000104423.2	protein_coding	chr1_83000000	0	0	0	0.5926	0.4728	-0.1198	.
A030005L19Rik	ENSMUSG00000113880.2	protein_coding	chr1_82850000	0.6446	0.9703	0.2607	0.5281	0.6728	0.1447	.
A030014E15Rik	ENSMUSG00000113973.2	protein_coding	chr1_82900000	0.2092	0	-0.2741	0.6571	0.5052	-0.1519	.
A130010J15Rik	ENSMUSG00000079144.8	protein_coding	chr1_192850000	2.4343	5.531	0.9273	0.6078	0.5483	-0.0595	.
A130014A01Rik	ENSMUSG00000097944.4	lncRNA	chr8_120800000	0.8606	1.6272	0.4978	0.9925	0.9499	-0.0426	.
A130023I24Rik	ENSMUSG00000050066.7	lncRNA	chr7_133800000	0	0	0	0.6905	0.8266	0.1361	.
A130030D18Rik	ENSMUSG00000087061.2	lncRNA	chr2_82200000	0	0	0	0.1578	0.1153	-0.0425	.
A130051J06Rik	ENSMUSG00000097643.3	lncRNA	chr15_95700000	0.0232	0.225	0.2596	0.6616	0.8382	0.1766	.
A1bg	ENSMUSG00000022347.9	protein_coding	chr15_60750000	0.0064	0.0016	-0.0069	0.5033	0.5806	0.0774	.
A1cf	ENSMUSG00000052595.9	protein_coding	chr19_31800000	0	0	0	0.6324	0.3697	-0.2627	.
A230001M10Rik	ENSMUSG00000105891.7	lncRNA	chr3_102300000	0.0009	0	-0.0013	0.6794	0.4095	-0.2699	.
A230004M16Rik	ENSMUSG00000087306.8	lncRNA	chr11_41700000	0.0119	0	-0.017	0.3563	0.0291	-0.3272	.
A230005M16Rik	ENSMUSG00000087612.2	lncRNA	chr2_25550000	0.0431	0.107	0.0858	0.89	0.9271	0.0371	.
A230006K03Rik	ENSMUSG00000068151.11	lncRNA	chr7_60750000	0.0009	0	-0.0013	0.2152	0.1109	-0.1043	.
A230009B12Rik	ENSMUSG00000089633.5	lncRNA	chr17_10650000	0.0327	0.0115	-0.0299	0.7266	0.8157	0.0891	.
A230020J21Rik	ENSMUSG00000097845.4	lncRNA	chr1_190750000	1.1015	0.1178	-0.9108	0.7592	0.7815	0.0223	.
A230028O05Rik	ENSMUSG00000096960.4	lncRNA	chr16_24850000	0.3411	0.1218	-0.2576	0.6505	0.9068	0.2563	Top
A230045G11Rik	ENSMUSG00000121789.2	lncRNA	chr17_3150000	2.9373	9.2702	1.3832	0.587	0.7466	0.1597	.
A230051N06Rik	ENSMUSG00000117172.3	lncRNA	chr17_56500000	0	0	0	0.9077	0.9528	0.0451	.
A230056P14Rik	ENSMUSG00000087178.10	lncRNA	chr7_55600000	0.0157	0.7411	0.7776	0.5767	0.7418	0.1651	.
A230057D06Rik	ENSMUSG00000109394.4	lncRNA	chr7_61550000	0	0.6194	0.6955	0.2155	0.4009	0.1854	.
A230059L01Rik	ENSMUSG00000087627.3	lncRNA	chr1_146650000	0	0	0	0.0016	0.2693	0.2677	Top
A230060F14Rik	ENSMUSG00000097692.3	lncRNA	chr10_85850000	0.1869	0.3865	0.2243	0.7832	0.6269	-0.1563	.
A230065N10Rik	ENSMUSG00000092071.2	lncRNA	chr7_89250000	0	0.3035	0.3823	0.4475	0.6365	0.189	.
A230070E04Rik	ENSMUSG00000129504.1	lncRNA	chr14_68350000	1.451	0.1452	-1.0977	0.7302	0.4619	-0.2683	.
A230072C01Rik	ENSMUSG00000086877.10	lncRNA	chrX_20800000	1.859	2.1149	0.1237	0.5714	0.787	0.2157	.
A230072E10Rik	ENSMUSG00000084771.11	lncRNA	chrX_150100000	0.1339	0.0198	-0.1529	0.7152	0.5963	-0.1189	.
A230077H06Rik	ENSMUSG00000100600.8	lncRNA	chr7_40450000	0	0.0034	0.0048	0.6771	0.3274	-0.3497	.
A230083G16Rik	ENSMUSG00000055818.4	lncRNA	chr6_124850000	0.1945	2.8855	1.7017	0.833	0.948	0.115	.
A230083N12Rik	ENSMUSG00000085482.3	lncRNA	chr4_74150000	2.3592	1.4575	-0.4509	0.5078	0.5084	0.0006	.
A230087F16Rik	ENSMUSG00000097381.4	lncRNA	chr12_111250000	0.0282	0.0394	0.0157	0.9478	0.9357	-0.0121	.
A230103J11Rik	ENSMUSG00000087026.9	lncRNA	chr8_85750000	0.1553	0.2031	0.0584	0.982	0.9591	-0.0228	.
A230103O09Rik	ENSMUSG00000114491.4	lncRNA	chr13_39950000	0	0	0	0.5685	0.3995	-0.1689	.
A230107N01Rik	ENSMUSG00000097292.4	lncRNA	chr13_84350000	0.0571	0.6636	0.6542	0.3714	0.4497	0.0782	.
A230108P19Rik	ENSMUSG00000087125.3	lncRNA	chr2_6300000	0	0.0002	0.0003	0.6558	0.7377	0.0819	.
A2m	ENSMUSG00000030111.10	protein_coding	chr6_121650000	0.6749	17.8172	3.4899	0.4176	0.1225	-0.2951	.
A2ml1	ENSMUSG00000047228.10	protein_coding	chr6_128500000	0	0.0016	0.0022	0.5003	0.3947	-0.1057	.
A330008L17Rik	ENSMUSG00000052479.7	lncRNA	chr8_100200000	0.0011	0.0001	-0.0015	0.2298	0.0445	-0.1853	.
A330009N23Rik	ENSMUSG00000097915.5	lncRNA	chr15_101100000	0.0658	0.1216	0.0735	0.9615	0.8609	-0.1006	.
A330015K06Rik	ENSMUSG00000104093.4	lncRNA	chr3_65050000	0.002	0.0079	0.0085	0.5403	0.4197	-0.1206	.
A330023F24Rik	ENSMUSG00000096929.10	lncRNA	chr1_194700000	0.1778	0.0413	-0.1777	0.2554	0.4319	0.1766	.
A330032B11Rik	ENSMUSG00000097591.2	lncRNA	chr19_37150000	0	0.0065	0.0093	0.8265	0.8144	-0.0122	.
A330035P11Rik	ENSMUSG00000085615.5	lncRNA	chr14_122300000	0.7152	3.1584	1.2777	0.5862	0.6751	0.0889	.
A330040F15Rik	ENSMUSG00000086213.4	protein_coding	chr19_12450000	0.0024	0.0009	-0.0021	0.8348	0.5716	-0.2632	.
A330041J22Rik	ENSMUSG00000087466.5	lncRNA	chr9_86550000	0.0575	1.0913	0.9838	0.5382	0.6891	0.1509	.
A330043C09Rik	ENSMUSG00000086044.3	lncRNA	chr2_74950000	0	0	0	0.7577	0.8478	0.09	.
A330048O09Rik	ENSMUSG00000097326.5	lncRNA	chr13_48400000	1.4277	0.2523	-0.9551	0.8329	0.7592	-0.0738	.
A330049N07Rik	ENSMUSG00000111994.4	lncRNA	chr10_72850000	0.0214	0.0004	-0.03	0.4228	0.266	-0.1569	.
A330069E16Rik	ENSMUSG00000120340.2	lncRNA	chr2_91050000	0.158	0.5094	0.3823	0.7934	0.9441	0.1507	.
A330069K06Rik	ENSMUSG00000103181.3	lncRNA	chr3_80050000	0	0	0	0.4002	0.0948	-0.3054	.
A330070K13Rik	ENSMUSG00000052014.9	lncRNA	chr5_130400000	0.0284	0	-0.0404	0.651	0.3238	-0.3272	.
A330072L02Rik	ENSMUSG00000117100.3	lncRNA	chr17_58950000	0	0	0	0.2861	0.0649	-0.2213	.
A330074K22Rik	ENSMUSG00000097960.3	lncRNA	chr8_120950000	0.0443	0.105	0.0815	0.9932	0.8659	-0.1273	.
A330076H08Rik	ENSMUSG00000109321.3	lncRNA	chr7_61550000	0.0034	1.4803	1.3056	0.2155	0.4009	0.1854	.
A330084C13Rik	ENSMUSG00000114210.5	lncRNA	chr18_65000000	0.3271	1.6813	1.0146	0.7256	0.8625	0.1369	.
A330087D11Rik	ENSMUSG00000100111.4	lncRNA	chr7_29250000	0.019	0.0013	-0.0253	0.9181	0.6191	-0.299	.
A330093E20Rik	ENSMUSG00000098284.10	lncRNA	chr18_45900000	0.0009	0.0223	0.0305	0.365	0.2633	-0.1017	.
A330094K24Rik	ENSMUSG00000097666.5	lncRNA	chr18_77800000	0.8929	0.0601	-0.8363	0.791	0.7732	-0.0178	.
A330102I10Rik	ENSMUSG00000086363.10	lncRNA	chr13_29150000	0.0636	0.1439	0.105	0.5722	0.7836	0.2114	.
A3galt2	ENSMUSG00000028794.14	protein_coding	chr4_128600000	0.0492	0.2215	0.2193	0.9933	0.8874	-0.106	.
A430005L14Rik	ENSMUSG00000047613.11	protein_coding	chr4_154000000	35.4259	23.5305	-0.5704	0.9475	0.5591	-0.3883	.
A430018G15Rik	ENSMUSG00000085315.10	lncRNA	chr2_52300000	0.1547	1.4205	1.0678	0.613	0.7618	0.1488	.
A430027H14Rik	ENSMUSG00000104507.3	lncRNA	chr1_189050000	0.0138	1.0516	1.017	0.6302	0.5763	-0.0539	.
A430033K04Rik	ENSMUSG00000056014.17	protein_coding	chr5_138650000	0.8773	3.195	1.16	0.8783	0.7022	-0.176	.
A430034D21Rik	ENSMUSG00000103594.2	lncRNA	chr1_136150000	0	0	0	0.8499	0.9454	0.0956	.
A430035B10Rik	ENSMUSG00000087305.11	lncRNA	chr6_8500000	0.0086	1.202	1.1264	0.4281	0.5198	0.0917	.
A430046D13Rik	ENSMUSG00000119994.2	lncRNA	chr10_128350000	0.2519	1.845	1.1843	0.7438	0.8879	0.1442	.
A430048G15Rik	ENSMUSG00000086650.3	lncRNA	chr2_133250000	0.0074	0	-0.0107	0.4348	0.3252	-0.1097	.
A430057M04Rik	ENSMUSG00000090564.11	lncRNA	chr14_21900000	0.8524	0.2601	-0.5558	0.8338	0.7625	-0.0712	.
A430072P03Rik	ENSMUSG00000090030.3	lncRNA	chr5_107850000	0	0	0	0.8437	0.6334	-0.2103	.
A430073I11Rik	ENSMUSG00000104022.2	lncRNA	chr1_183200000	0	0.0268	0.0382	0.7604	0.7322	-0.0282	.
A430078I02Rik	ENSMUSG00000085589.8	lncRNA	chr6_86400000	0.2852	0.1736	-0.1311	0.8801	0.9482	0.0681	.
A430088P11Rik	ENSMUSG00000116220.3	lncRNA	chr15_80550000	0	0	0	0.9693	0.9173	-0.0521	.
A430090L17Rik	ENSMUSG00000114213.2	lncRNA	chr13_114250000	0	0	0	0.6067	0.4596	-0.1471	.
A430093F15Rik	ENSMUSG00000067577.11	lncRNA	chr19_10750000	0.0037	0	-0.0054	0.9754	0.6686	-0.3068	.
A430102K17Rik	ENSMUSG00000107288.3	lncRNA	chr5_115450000	0.0867	0.225	0.1728	0.9531	0.9738	0.0207	.
A430105J06Rik	ENSMUSG00000097784.3	lncRNA	chr1_186450000	0.8409	2.0689	0.7373	0.7315	0.5517	-0.1798	.
A430108G06Rik	ENSMUSG00000086851.3	lncRNA	chr11_53450000	0.195	1.0842	0.8025	0.9073	0.9761	0.0688	.
A430110L20Rik	ENSMUSG00000054135.3	lncRNA	chr1_181050000	1.1	1.4622	0.2296	0.8997	0.8693	-0.0304	.
A4galt	ENSMUSG00000047878.14	protein_coding	chr15_83100000	4.8381	0.0033	-2.5408	0.9901	0.818	-0.1721	.
A4gnt	ENSMUSG00000037953.8	protein_coding	chr9_99500000	0.0189	0	-0.027	0.7453	0.6059	-0.1395	.
A530001N23Rik	ENSMUSG00000114452.3	lncRNA	chr13_60650000	0	0.3769	0.4614	0.6876	0.5681	-0.1195	.
A530006G24Rik	ENSMUSG00000051986.7	lncRNA	chr2_147550000	0	0	0	0.3223	0.2595	-0.0628	.
A530010F05Rik	ENSMUSG00000085797.3	lncRNA	chr2_125100000	0	0	0	0.5931	0.8268	0.2337	.
A530010L16Rik	ENSMUSG00000110682.2	lncRNA	chr8_123450000	0	0	0	0.9964	0.9472	-0.0492	.
A530013C23Rik	ENSMUSG00000006462.9	lncRNA	chr2_167550000	0.023	0.0025	-0.0291	0.9961	0.837	-0.159	.
A530016L24Rik	ENSMUSG00000043122.8	protein_coding	chr12_112450000	0.1703	0	-0.2269	0.8835	0.6879	-0.1956	.
A530017D24Rik	ENSMUSG00000072847.6	lncRNA	chr11_61750000	4.3729	7.2539	0.6194	0.8247	0.9866	0.1619	.
A530020G20Rik	ENSMUSG00000097124.4	lncRNA	chr3_121300000	0.1031	0	-0.1416	0.7487	0.8885	0.1398	.
A530021J07Rik	ENSMUSG00000053528.8	lncRNA	chr7_82750000	0	0	0	0.5274	0.5734	0.046	.
A530041M06Rik	ENSMUSG00000104973.3	lncRNA	chr3_104400000	0.1718	0.0644	-0.1386	0.6843	0.8715	0.1873	.
A530046M15Rik	ENSMUSG00000113338.2	lncRNA	chr13_16000000	0.0174	0	-0.0249	0.4902	0.2805	-0.2097	.
A530053G22Rik	ENSMUSG00000046764.10	lncRNA	chr6_60300000	0	0	0	0.4405	0.0197	-0.4208	.
A530053M12Rik	ENSMUSG00000100247.3	lncRNA	chr1_106300000	0	0.1179	0.1608	0.6417	0.7637	0.122	.
A530065N20Rik	ENSMUSG00000114531.3	lncRNA	chr13_60250000	0.0012	0.0014	0.0002	0.7828	0.9001	0.1173	.
A530072M11Rik	ENSMUSG00000085112.4	lncRNA	chr4_16250000	0.007	0.1131	0.1445	0.399	0.1693	-0.2297	.
A530076I17Rik	ENSMUSG00000086124.4	lncRNA	chr14_45900000	0.0237	0.0345	0.0151	0.804	0.667	-0.137	.
A530083I20Rik	ENSMUSG00000097322.10	lncRNA	chr9_122700000	0	0.135	0.1827	0.7447	0.627	-0.1177	.
A530088E08Rik	ENSMUSG00000117872.2	lncRNA	chr17_32600000	0.0425	0.0233	-0.0267	0.9997	0.8422	-0.1575	.
A530095I07Rik	ENSMUSG00000051805.3	lncRNA	chr13_69650000	0	0.0778	0.1081	0.7982	0.7995	0.0013	.
A630001G21Rik	ENSMUSG00000052760.17	protein_coding	chr1_85650000	0.0229	0.0346	0.0164	0.7905	0.5202	-0.2704	.
A630001O12Rik	ENSMUSG00000110498.3	lncRNA	chr8_127550000	0.0669	0.0149	-0.072	0.7681	0.8842	0.1161	.
A630010A05Rik	ENSMUSG00000075395.13	lncRNA	chr16_14450000	0	0	0	0.5902	0.1051	-0.4852	Bottom
A630012P03Rik	ENSMUSG00000055110.9	lncRNA	chrX_51700000	0.0077	0	-0.0111	0.7349	0.6323	-0.1026	.
A630014C17Rik	ENSMUSG00000086395.2	lncRNA	chr11_52150000	0.0494	0.0088	-0.0569	0.9792	0.8851	-0.0941	.
A630019I02Rik	ENSMUSG00000114968.2	lncRNA	chr13_93200000	0.1208	0	-0.1645	0.7021	0.6121	-0.09	.
A630023A22Rik	ENSMUSG00000095493.3	protein_coding	chr14_33750000	0.0133	0	-0.019	0.8905	0.4838	-0.4066	.
A630023P12Rik	ENSMUSG00000048215.17	lncRNA	chr5_110600000	0.2125	0	-0.278	0.9523	0.8005	-0.1518	.
A630031M04Rik	ENSMUSG00000087470.5	lncRNA	chr4_127450000	0.0056	0	-0.0081	0.9397	0.3109	-0.6289	Bottom
A630035G10Rik	ENSMUSG00000103083.2	lncRNA	chr1_171500000	0	0	0	0.5034	0.1211	-0.3823	.
A630050E04Rik	ENSMUSG00000085387.3	lncRNA	chr2_73900000	0	0	0	0.7092	0.7295	0.0203	.
A630052C17Rik	ENSMUSG00000086725.3	lncRNA	chr11_29100000	1.2239	7.0718	1.8598	0.4856	0.7368	0.2512	.
A630066F11Rik	ENSMUSG00000120335.2	lncRNA	chr10_7500000	0.7896	6.1249	1.9932	0.6846	0.7782	0.0935	.
A630072L19Rik	ENSMUSG00000097160.3	lncRNA	chr12_100900000	0.1048	0.0357	-0.0933	0.8161	0.7288	-0.0874	.
A630072M18Rik	ENSMUSG00000101013.2	lncRNA	chr5_21150000	2.1458	6.7301	1.2971	0.5598	0.7907	0.2308	.
A630073D07Rik	ENSMUSG00000067541.8	protein_coding	chr6_132600000	0	0	0	0.0732	0.0064	-0.0668	.
A630076J17Rik	ENSMUSG00000094613.4	lncRNA	chr3_107100000	0.081	0	-0.1124	0.6138	0.552	-0.0619	.
A630089N07Rik	ENSMUSG00000116673.2	protein_coding	chr16_97800000	9.7818	0.4013	-2.9437	0.5972	0.4863	-0.1109	.
A630091E08Rik	ENSMUSG00000055446.6	lncRNA	chr7_98150000	0	0	0	0.9347	0.9007	-0.034	.
A630095N17Rik	ENSMUSG00000096094.3	protein_coding	chr1_75200000	0.1364	0.0137	-0.1648	0.8677	0.9545	0.0867	.
A730004F24Rik	ENSMUSG00000103690.3	lncRNA	chr1_186250000	0.0051	0.0002	-0.007	0.6959	0.6201	-0.0758	.
A730006G06Rik	ENSMUSG00000117334.3	lncRNA	chr17_48350000	0	0	0	0.9317	0.7217	-0.21	.
A730009L09Rik	ENSMUSG00000110358.2	lncRNA	chr16_84300000	0	0.0054	0.0078	0.3216	0.3079	-0.0137	.
A730011C13Rik	ENSMUSG00000084846.2	lncRNA	chr3_94900000	2.2804	4.8777	0.8414	0.8344	0.9362	0.1018	.
A730017L22Rik	ENSMUSG00000085566.2	lncRNA	chr2_130700000	0.1552	1.2358	0.9526	0.7504	0.8519	0.1015	.
A730018C14Rik	ENSMUSG00000047828.6	lncRNA	chr12_112350000	0	0	0	0.9023	0.4465	-0.4558	.
A730020E08Rik	ENSMUSG00000097924.4	lncRNA	chr6_61100000	0.009	0.1393	0.1753	0.4627	0.2492	-0.2135	.
A730020M07Rik	ENSMUSG00000044522.10	lncRNA	chr3_121400000	0.0306	0.1116	0.1091	0.6552	0.7961	0.1408	.
A730032A03Rik	ENSMUSG00000085649.8	lncRNA	chr2_164000000	0	0	0	0.7898	0.6978	-0.092	.
A730035I17Rik	ENSMUSG00000045238.11	lncRNA	chr5_98300000	0.1883	6.3888	2.6364	0.5956	0.4814	-0.1142	.
A730036I17Rik	ENSMUSG00000056738.14	lncRNA	chr2_129050000	0.697	0	-0.763	0.8999	0.8016	-0.0983	.
[truncated: 52,694 more rows]
