# Supplementary material
Source: Research Square preprint supplement (doi:10.21203/rs.3.rs-9927928/v1)
Supplement: Supplementary file 3 [file 6056d8fd361d1738677a2039.xlsx]

## Sheet: Suppl Table 6
Supplementary Table 6. GPSeq adapters and corresponding oligos used in this study.
Oligos for YFISH
Oligo name		Sequence (5'->3')	Length	Modification	Purification
YFISH_ATTO647N		ACAAGTTGGGTTTAAGATTC/3ATTO647NN/	20	3'ATTO647NN	HPLC
Oligos for making GPSeq adapters
GPSeq adapter name		Sequence (5'->3')	Length	Barcode	Modification	Purification
GPSeq_All-in-one_DpnII_BC1	Sense oligo:	CGGAGACACAGCATACTATGTTCGGAGACACAGCATACTATGTTGAATTTAATACGACTCACTATAGGGAGAGTGTTCAGAGTTCTACAGTCCGACGATCNNNNNNNNCATCACGC	116	CATCACGC		Ultramer, Desalted
	Antisense oligo:	/5Phos/GATCGCGTGATGNNNNNNNNGATCGTCGGACTGTAGAACTCTGAACACTCTCCCTATAGTGAGTCGTATTAAATTCTTCGGAGACACAGCATACTATGTTCGGAGACACAGCATACTATG	120		5'Phos	Ultramer, Desalted
GPSeq_All-in-one_DpnII_BC2	Sense oligo:	CGGAGACACAGCATACTATGTTCGGAGACACAGCATACTATGTTGAATTTAATACGACTCACTATAGGGAGAGTGTTCAGAGTTCTACAGTCCGACGATCNNNNNNNNGTCGTATC	116	GTCGTATC		Ultramer, Desalted
	Antisense oligo:	/5Phos/GATCGATACGACNNNNNNNNGATCGTCGGACTGTAGAACTCTGAACACTCTCCCTATAGTGAGTCGTATTAAATTCTTCGGAGACACAGCATACTATGTTCGGAGACACAGCATACTATG	120		5'Phos	Ultramer, Desalted
GPSeq_All-in-one_DpnII_BC3	Sense oligo:	CGGAGACACAGCATACTATGTTCGGAGACACAGCATACTATGTTGAATTTAATACGACTCACTATAGGGAGAGTGTTCAGAGTTCTACAGTCCGACGATCNNNNNNNNACGACCGC	116	ACGACCGC		Ultramer, Desalted
	Antisense oligo:	/5Phos/GATCGCGGTCGTNNNNNNNNGATCGTCGGACTGTAGAACTCTGAACACTCTCCCTATAGTGAGTCGTATTAAATTCTTCGGAGACACAGCATACTATGTTCGGAGACACAGCATACTATG	120		5'Phos	Ultramer, Desalted
Oligos for GPSeq library prep
Oligo name		Sequence (5'->3')	Length	Modification	Purification
RA3		/5rApp/TGGAATTCTCGGGTGCCAAGG/3SpC3/	21	5'Adenylation, 3'Spacer	HPLC
RTP		GCCTTGGCACCCGAGAATTCCA	22		Desalt
RP1		AATGATACGGCGACCACCGAGATCTACACGTTCAGAGTTCTACAGTCCGA	50		Desalt
Oligo name		Sequence (5'->3')		Index	Purification
RPI1		CAAGCAGAAGACGGCATACGAGATCGTGATGTGACTGGAGTTCCTTGGCACCCGAGAATTCCA	63	CGTGAT	Desalt
RPI2		CAAGCAGAAGACGGCATACGAGATACATCGGTGACTGGAGTTCCTTGGCACCCGAGAATTCCA	63	ACATCG	Desalt
RPI3		CAAGCAGAAGACGGCATACGAGATGCCTAAGTGACTGGAGTTCCTTGGCACCCGAGAATTCCA	63	GCCTAA	Desalt
RPI4		CAAGCAGAAGACGGCATACGAGATTGGTCAGTGACTGGAGTTCCTTGGCACCCGAGAATTCCA	63	TGGTCA	Desalt
RPI5		CAAGCAGAAGACGGCATACGAGATCACTGTGTGACTGGAGTTCCTTGGCACCCGAGAATTCCA	63	CACTGT	Desalt
RPI6		CAAGCAGAAGACGGCATACGAGATATTGGCGTGACTGGAGTTCCTTGGCACCCGAGAATTCCA	63	ATTGGC	Desalt
RPI7		CAAGCAGAAGACGGCATACGAGATGATCTGGTGACTGGAGTTCCTTGGCACCCGAGAATTCCA	63	GATCTG	Desalt
RPI8		CAAGCAGAAGACGGCATACGAGATTCAAGTGTGACTGGAGTTCCTTGGCACCCGAGAATTCCA	63	TCAAGT	Desalt
RPI9		CAAGCAGAAGACGGCATACGAGATCTGATCGTGACTGGAGTTCCTTGGCACCCGAGAATTCCA	63	CTGATC	Desalt
RPI10		CAAGCAGAAGACGGCATACGAGATAAGCTAGTGACTGGAGTTCCTTGGCACCCGAGAATTCCA	63	AAGCTA	Desalt
RPI11		CAAGCAGAAGACGGCATACGAGATGTAGCCGTGACTGGAGTTCCTTGGCACCCGAGAATTCCA	63	GTAGCC	Desalt
RPI12		CAAGCAGAAGACGGCATACGAGATTACAAGGTGACTGGAGTTCCTTGGCACCCGAGAATTCCA	63	TACAAG	Desalt
RPI13		CAAGCAGAAGACGGCATACGAGATTTGACTGTGACTGGAGTTCCTTGGCACCCGAGAATTCCA	63	TTGACT	Desalt
RPI14		CAAGCAGAAGACGGCATACGAGATGGAACTGTGACTGGAGTTCCTTGGCACCCGAGAATTCCA	63	GGAACT	Desalt
RPI15		CAAGCAGAAGACGGCATACGAGATTGACATGTGACTGGAGTTCCTTGGCACCCGAGAATTCCA	63	TGACAT	Desalt
RPI16		CAAGCAGAAGACGGCATACGAGATGGACGGGTGACTGGAGTTCCTTGGCACCCGAGAATTCCA	63	GGACGG	Desalt
RPI17		CAAGCAGAAGACGGCATACGAGATCTCTACGTGACTGGAGTTCCTTGGCACCCGAGAATTCCA	63	CTCTAC	Desalt
RPI18		CAAGCAGAAGACGGCATACGAGATGCGGACGTGACTGGAGTTCCTTGGCACCCGAGAATTCCA	63	GCGGAC	Desalt
RPI19		CAAGCAGAAGACGGCATACGAGATTTTCACGTGACTGGAGTTCCTTGGCACCCGAGAATTCCA	63	TTTCAC	Desalt
RPI20		CAAGCAGAAGACGGCATACGAGATGGCCACGTGACTGGAGTTCCTTGGCACCCGAGAATTCCA	63	GGCCAC	Desalt
RPI21		CAAGCAGAAGACGGCATACGAGATCGAAACGTGACTGGAGTTCCTTGGCACCCGAGAATTCCA	63	CGAAAC	Desalt
RPI22		CAAGCAGAAGACGGCATACGAGATCGTACGGTGACTGGAGTTCCTTGGCACCCGAGAATTCCA	63	CGTACG	Desalt
RPI23		CAAGCAGAAGACGGCATACGAGATCCACTCGTGACTGGAGTTCCTTGGCACCCGAGAATTCCA	63	CCACTC	Desalt
RPI24		CAAGCAGAAGACGGCATACGAGATGCTACCGTGACTGGAGTTCCTTGGCACCCGAGAATTCCA	63	GCTACC	Desalt
