# Supplementary material
Source: Research Square preprint supplement (doi:10.21203/rs.3.rs-9927928/v1)
Supplement: Supplementary file 4 [file 6f331045a49beab1782ef2d4.xlsx]

## Sheet: Suppl Table 3
Supplementary Table 3. Results of all the GO analyses described in this study.
Reference figure	GO term ID	Description	p.adjust	geneID	Count	GeneTotal	FoldEnrichment	TotalInputGenes	index
Figure 3d	GO:0097009	energy homeostasis	1.83365e-32	Mir134/Mir382/Mir377/Mir154/Mir411/Mir410/Mir379/Mir369/Mir412/Mir329/Mir323/Mir495/Mir485/Mir496a/Mir494/Mir376c/Mir541/Mir539/Mir679/Mir487b/Mir543/Mir666/Mir667/Mir758/Mir544/Mir453/Mir654/Mir1193/Mir1197/Mir299b/Mir300/Mir381/Mir668/Mir380/Mir376a/Mir409/Mir376b/Mir299a	38	421	16.7305	1303	1
Figure 3d	GO:0071234	cellular response to phenylalanine	7.23368e-24	Mir382/Mir377/Mir154/Mir369/Mir495/Mir496a/Mir376c/Mir539/Mir487b/Mir543/Mir666/Mir667/Mir544/Mir654/Mir3072/Mir376a/Mir409/Mir376b	18	421	40.8929	1303	2
Figure 3d	GO:0080053	response to phenylalanine	7.23368e-24	Mir382/Mir377/Mir154/Mir369/Mir495/Mir496a/Mir376c/Mir539/Mir487b/Mir543/Mir666/Mir667/Mir544/Mir654/Mir3072/Mir376a/Mir409/Mir376b	18	421	40.8929	1303	3
Figure 3d	GO:2000342	negative regulation of chemokine (C-X-C motif) ligand 2 production	5.46625e-12	Oas1c/Oas1h/Oas1b/Oas1d/Oas3/Oas1a/Oas1f/Oas1g/Oas1e	9	421	46.4692	1303	4
Figure 3d	GO:0060700	regulation of ribonuclease activity	5.25761e-10	Oas1c/Oas1h/Oas1b/Oas1d/Oas3/Oas1a/Oas1f/Oas1g/Oas1e	9	421	31.9476	1303	5
Figure 3d	GO:0071229	cellular response to acid chemical	8.32918e-09	Grin2a/Mir134/Mir382/Mir377/Mir154/Mir379/Mir369/Mir495/Mir496a/Mir376c/Mir539/Mir487b/Mir543/Mir666/Mir667/Mir544/Mir654/Mir3072/Mir376a/Mir409/Mir376b	21	421	6.17985	1303	6
Figure 3d	GO:0060291	long-term synaptic potentiation	4.50311e-08	Tshz3/Nos1/Shank2/Grin2a/Mir134/Mir382/Mir411/Mir410/Mir379/Mir337/Mir369/Mir433/Mir127/Mir434/Mir540/Mir541/Mir539/Mir487b/Mir673/Mir667/Mir770/Mir300/Mir381	23	421	5.06318	1303	7
Figure 3d	GO:0060339	negative regulation of type I interferon-mediated signaling pathway	9.0705e-08	Oas1c/Oas1h/Oas1b/Oas1d/Oas3/Oas1a/Oas1f/Oas1g/Oas1e	9	421	18.9319	1303	8
Figure 3d	GO:0032069	regulation of nuclease activity	1.2386e-07	Oas1c/Oas1h/Oas1b/Oas1d/Oas3/Oas1a/Oas1f/Oas1g/Oas1e	9	421	18.2558	1303	9
Figure 3d	GO:0035457	cellular response to interferon-alpha	1.37998e-07	Oas1c/Oas1h/Oas1b/Oas1d/Oas1a/Oas1f/Oas1g/Oas1e	8	421	22.7183	1303	10
Figure 3d	GO:0043129	surfactant homeostasis	2.17223e-07	Oas1c/Oas1h/Bpifa1/Oas1b/Oas1d/Oas1a/Oas1f/Oas1g/Oas1e	9	421	16.4891	1303	11
Figure 3d	GO:0034138	toll-like receptor 3 signaling pathway	2.86922e-07	Oas1c/Oas1h/Oas1b/Oas1d/Rftn1/Oas1a/Oas1f/Oas1g/Oas1e	9	421	15.9738	1303	12
Figure 3d	GO:1901857	positive regulation of cellular respiration	1.22788e-06	Oas1c/Oas1h/Oas1b/Oas1d/Oas1a/Oas1f/Oas1g/Oas1e	8	421	16.8284	1303	13
Figure 3d	GO:0042742	defense response to bacterium	4.25092e-06	Oas1c/Oas1h/Il7r/Gzmb/Bpifa1/Gbp9/Oas1b/Klk7/Oas1d/Oas3/Gbp8/Trem1/Bpifa2/Dmbt1/Oas1a/Oas1f/Krt6a/Oas1g/Oas1e/Naip5/Klk5/Defa42/Defa20/Defa2/Gbp10	25	421	3.54088	1303	14
Figure 3d	GO:0060761	negative regulation of response to cytokine stimulus	9.37516e-06	Oas1c/Oas1h/Oas1b/Oas1d/Oas3/Oas1a/Oas1f/Slit3/Oas1g/Oas1e/Naip5	11	421	7.90827	1303	15
Figure 3d	GO:0140894	endolysosomal toll-like receptor signaling pathway	1.44051e-05	Oas1c/Oas1h/Oas1b/Oas1d/Rftn1/Oas1a/Oas1f/Oas1g/Oas1e	9	421	10.0228	1303	16
Figure 3d	GO:0045071	negative regulation of viral genome replication	2.92846e-05	Oas1c/Oas1h/Oas1b/Oas1d/Oas3/Oas1a/Oas1f/Oas1g/Oas1e	9	421	9.12788	1303	17
Figure 3d	GO:1990089	response to nerve growth factor	9.80652e-05	Cdc5lrt7/Cdc5lrt1/Cdc5lrt4/Cdc5lrt6/Cdc5lrt9/Cdc5lrt8/Cdc5lrt5/Cdc5lrt10	8	421	9.27277	1303	18
Figure 3d	GO:1990090	cellular response to nerve growth factor stimulus	9.80652e-05	Cdc5lrt7/Cdc5lrt1/Cdc5lrt4/Cdc5lrt6/Cdc5lrt9/Cdc5lrt8/Cdc5lrt5/Cdc5lrt10	8	421	9.27277	1303	19
Figure 3d	GO:0140888	interferon-mediated signaling pathway	0.000103557	Oas1c/Oas1h/Zbp1/Oas1b/Oas1d/Oas3/Oas1a/Oas1f/Oas1g/Oas1e	10	421	6.7614	1303	20
Figure 3e	GO:0016358	dendrite development	4.14128e-05	Map2/Fyn/Psen1/Robo1/Nr3c1/Tnik/Ppp3ca/Pdlim5/Ptprd/Mpdz/Sema3a/Ptn/Mef2a/Bmp5/Nedd4/Adgrb3/Myo6/Atp7a/Dock10/Picalm/Dnm3/Tanc2/Nlgn1/Ptprz1/Dynlt1b	25	508	3.60958	1070	1
Figure 3e	GO:0050807	regulation of synapse organization	4.69854e-05	Fyn/Psen1/Ptk2/Robo1/Nrxn1/Nrp2/Pdlim5/Ptprd/Ptn/Gpm6a/Nedd4/Adgrb3/Setd5/Six4/Mdga2/Dgkb/Adgrl3/Picalm/Dnm3/Pik3r1/Six1/Tanc2/Nlgn1/Grid2	24	508	3.65584	1070	2
Figure 3e	GO:0007416	synapse assembly	4.69854e-05	Ptk2/Robo1/Nrxn1/Pdlim5/Ptprd/Gpm6a/Adgrb3/Myo6/Setd5/Six4/Mdga2/Adgrl3/Dnm3/Pik3r1/Fzd5/Gap43/Six1/Erbb4/Nlgn1/Grid2	20	508	4.25963	1070	3
Figure 3e	GO:0050803	regulation of synapse structure or activity	6.16364e-05	Fyn/Psen1/Ptk2/Robo1/Nrxn1/Nrp2/Pdlim5/Ptprd/Ptn/Gpm6a/Nedd4/Adgrb3/Setd5/Six4/Mdga2/Dgkb/Adgrl3/Picalm/Dnm3/Pik3r1/Six1/Tanc2/Nlgn1/Grid2	24	508	3.56358	1070	4
Figure 3e	GO:0030900	forebrain development	0.000694554	Nfib/Rarb/Uchl5/Fyn/Psen1/Egfr/Hif1a/Pals1/Robo1/Creb1/Nrp2/Zeb2/Wnt2b/Sema3a/Foxp2/Lrp6/Usp9x/Pcm1/Zswim6/Atp7a/Cdon/Herc1/Wdr47/Plcb1/Robo2/Erbb4	26	508	2.8863	1070	5
Figure 3e	GO:0071560	cellular response to transforming growth factor beta stimulus	0.000694554	Fyn/Pals1/Ptk2/Zeb1/Nr3c1/Ldlrad4/Fbn2/Itgb8/Creb1/Zeb2/Fbn1/Spred1/Usp9x/Zfyve9/Snx25/Arid4a/Sox6/Bmpr1b/Mir145b	19	508	3.60608	1070	6
Figure 3e	GO:0010464	regulation of mesenchymal cell proliferation	0.000750354	Nfib/Myc/Zeb1/Foxp2/Ptn/Lrp6/Arhgap5/Six1	8	508	8.9655	1070	7
Figure 3e	GO:0045787	positive regulation of cell cycle	0.0009906	Cul3/Pkn2/Dyrk3/Egfr/Mnat1/Rb1/Rrm2b/Myc/Cdc73/Meis2/Gpsm2/Orc1/Lrp6/Phip/Plscr1/Plscr2/Wnk1/Plcb1/Ankrd17/Tmod3/Rad51b/Nsmce2/Srpk2	23	508	2.98233	1070	8
Figure 3e	GO:0007264	small GTPase mediated signal transduction	0.00140599	Cul3/Eps8/Cyrib/Robo1/Ralgps2/Itgav/Usp8/Gpsm2/Ccdc88a/Lpar6/Vav3/Sos2/Arhgap5/Dennd1a/Cdon/Dock10/Dgki/Kbtbd7/Lpar4/Akap13/Rap1a/Dok6/Kbtbd6/Rab9/Dynlt1b	25	508	2.75579	1070	9
Figure 3e	GO:0050890	cognition	0.00239892	Taco1/Eif2ak4/Psen1/Egfr/Hif1a/Pde4d/Nrxn1/Creb1/Meis2/Trpm7/Foxp2/Ptn/Chl1/Magt1/Adgrb3/Setd5/Dgki/Picalm/Ckap5/Grm5/Plcb1/Ptprz1	22	508	2.8139	1070	10
Figure 3e	GO:0061448	connective tissue development	0.00240981	Nfib/Rarb/Epyc/Hif1a/Trip11/Rb1/Zeb1/Itgb8/Atf2/Col11a1/Nfia/Lrp6/Bmp5/Atp7a/Trps1/Dmd/Sox6/Bmpr1b/Rasal2/Chaserr	20	508	2.97904	1070	11
Figure 3e	GO:0044772	mitotic cell cycle phase transition	0.00240981	Cul3/Arpp19/Nfib/Eps8/Cdk17/Egfr/Mnat1/Ccnh/Rb1/Rrm2b/Myc/Cep192/Cdc73/Ppp3ca/Cdkn2c/Nfia/Orc1/Cdk14/Cdk5rap2/Plcb1/Ankrd17/Tmod3/Rad51b/Usp47/Nsmce2	25	508	2.5919	1070	12
Figure 3e	GO:0051146	striated muscle cell differentiation	0.00257589	Rarb/Meis1/Spag9/Nln/Ppp3cb/Rb1/Myc/Nr3c1/Myoz2/Ppp3ca/Pdlim5/Mef2a/Adgrb3/Six4/Cdon/Dmd/Six1/Sox6/Tmod3/Akap6/Akap13	21	508	2.86506	1070	13
Figure 3e	GO:0031346	positive regulation of cell projection organization	0.00305202	Eps8/Fyn/Robo1/Nrxn1/Serpine2/Plxna2/Zeb2/Tnik/Ptprd/Ptn/Lrp6/Gpm6a/Bmp5/Ccdc88a/Atp7a/Picalm/Dnm3/Pik3r1/Dmd/Robo2/Cntn1/Nlgn1/Ptprz1/Rap1a/Dynlt1b	25	508	2.54702	1070	14
Figure 3e	GO:0007626	locomotory behavior	0.00305202	Eps8/Meis1/Npas3/Ppp3cb/Oxr1/Chl1/Myo6/Atp7a/Myo5a/Adgrl3/Wdr47/Ckap5/Dmd/Grm5/Cntn1/Kcnd2/Lsamp/Fign	18	508	3.12635	1070	15
Figure 3e	GO:0043954	cellular component maintenance	0.00884401	Fyn/Nrxn1/Sema3a/Tjp1/Mtmr2/Adgrb3/Adgrl3/Ckap5/Nlgn1	9	508	4.92581	1070	16
Figure 3e	GO:0034764	positive regulation of transmembrane transport	0.0104986	Psen1/Rasa1/Ppp3cb/Ppp3ca/Mef2a/Crebl2/Ank2/Atp7a/Myo5a/Ctss/Stim2/Dmd/Wnk1/Plcb1/Akap6/Erbb4/Rap1a	17	508	2.85775	1070	17
Figure 3e	GO:0048863	stem cell differentiation	0.011148	Hif1a/Nrp2/Ptprc/Zeb2/Sema6d/Mllt3/Sema3a/Ptn/Lrp6/Gpm6a/Shc4/Six1/Sox6/Erbb4/Mir125b-2/Mir99a/Chd2	17	508	2.82746	1070	18
Figure 3e	GO:0060368	regulation of Fc receptor mediated stimulatory signaling pathway	0.0136042	Ptprc/Plscr1/Plscr2/Rap1a	4	508	13.4483	1070	19
Figure 3e	GO:0051648	vesicle localization	0.0147279	Cul3/Map2/Psen1/Trip11/Trappc13/Nrxn1/Myo6/Myo5c/Myo5a/Picalm/Dnm3/Tanc2/Nlgn1/Trappc2	14	508	3.10832	1070	20
Figure 3f	GO:0097009	energy homeostasis	3.06223e-30	Mir154/Mir411/Mir379/Mir329/Mir496a/Mir376c/Mir541/Mir539/Mir679/Mir487b/Mir543/Mir667/Mir758/Mir544/Mir453/Mir654/Mir1193/Mir1197/Mir300/Mir381/Mir380/Mir376a/Mir299a	23	86	49.5721	150	1
Figure 3f	GO:0071234	cellular response to phenylalanine	2.16768e-16	Mir154/Mir496a/Mir376c/Mir539/Mir487b/Mir543/Mir667/Mir544/Mir654/Mir376a	10	86	111.214	150	2
Figure 3f	GO:0080053	response to phenylalanine	2.16768e-16	Mir154/Mir496a/Mir376c/Mir539/Mir487b/Mir543/Mir667/Mir544/Mir654/Mir376a	10	86	111.214	150	3
Figure 3f	GO:0060291	long-term synaptic potentiation	1.14126e-10	Nos1/Mir411/Mir379/Mir433/Mir127/Mir434/Mir540/Mir541/Mir539/Mir487b/Mir673/Mir667/Mir300/Mir381	14	86	15.0872	150	4
Figure 3f	GO:1990830	cellular response to leukemia inhibitory factor	9.52701e-10	Mir433/Mir127/Mir431/Mir434/Mir540/Mir539/Mir679/Mir665/Mir544/Mir493/Mir300/Mir381/Mir380/Mir376a	14	86	12.597	150	5
Figure 3f	GO:1990823	response to leukemia inhibitory factor	9.52701e-10	Mir433/Mir127/Mir431/Mir434/Mir540/Mir539/Mir679/Mir665/Mir544/Mir493/Mir300/Mir381/Mir380/Mir376a	14	86	12.516	150	6
Figure 3f	GO:0071229	cellular response to acid chemical	1.12229e-08	Mir154/Mir379/Mir496a/Mir376c/Mir539/Mir487b/Mir543/Mir667/Mir544/Mir654/Mir376a	11	86	15.8465	150	7
Figure 3f	GO:2000342	negative regulation of chemokine (C-X-C motif) ligand 2 production	3.82903e-06	Oas1c/Oas1d/Oas1a/Oas1g	4	86	101.104	150	8
Figure 3f	GO:0071260	cellular response to mechanical stimulus	8.03996e-06	Nos1/Mir154/Mir379/Mir665/Mir300/Mir376a	6	86	25.2759	150	9
Figure 3f	GO:0060700	regulation of ribonuclease activity	1.50437e-05	Oas1c/Oas1d/Oas1a/Oas1g	4	86	69.5087	150	10
Figure 3f	GO:0060339	negative regulation of type I interferon-mediated signaling pathway	0.00011516	Oas1c/Oas1d/Oas1a/Oas1g	4	86	41.1904	150	11
Figure 3f	GO:1901857	positive regulation of cellular respiration	0.00011516	Oas1c/Oas1d/Oas1a/Oas1g	4	86	41.1904	150	12
Figure 3f	GO:0032069	regulation of nuclease activity	0.00012816	Oas1c/Oas1d/Oas1a/Oas1g	4	86	39.7193	150	13
Figure 3f	GO:0043129	surfactant homeostasis	0.000160455	Oas1c/Oas1d/Oas1a/Oas1g	4	86	35.8755	150	14
Figure 3f	GO:0034138	toll-like receptor 3 signaling pathway	0.000170683	Oas1c/Oas1d/Oas1a/Oas1g	4	86	34.7544	150	15
Figure 3f	GO:0140894	endolysosomal toll-like receptor signaling pathway	0.00102362	Oas1c/Oas1d/Oas1a/Oas1g	4	86	21.8067	150	16
Figure 3f	GO:0140374	antiviral innate immune response	0.0012114	Oas1c/Oas1d/Oas1a/Oas1g	4	86	20.5952	150	17
Figure 3f	GO:0045071	negative regulation of viral genome replication	0.00136035	Oas1c/Oas1d/Oas1a/Oas1g	4	86	19.8596	150	18
Figure 3f	GO:0140895	cell surface toll-like receptor signaling pathway	0.00230628	Oas1c/Oas1d/Oas1a/Oas1g	4	86	16.5991	150	19
Figure 3f	GO:0002752	cell surface pattern recognition receptor signaling pathway	0.00261473	Oas1c/Oas1d/Oas1a/Oas1g	4	86	15.8877	150	20
Figure 3g	GO:0042063	gliogenesis	0.000160637	Nfib/Psen1/Egfr/Pals1/Rb1/Ptk2/Nr3c1/Creb1/Serpine2/Zeb2/Nfia/Ptn/Gpm6b/Ckap5/Gap43/Sox6/Cntn1/Ptprz1	18	225	4.83051	255	1
Figure 3g	GO:0016358	dendrite development	0.000160637	Map2/Fyn/Psen1/Nr3c1/Tnik/Ppp3ca/Pdlim5/Mpdz/Sema3a/Ptn/Mef2a/Adgrb3/Myo6/Dock10/Ptprz1/Dynlt1b	16	225	5.21576	255	2
Figure 3g	GO:0010001	glial cell differentiation	0.000160637	Nfib/Psen1/Egfr/Pals1/Nr3c1/Serpine2/Zeb2/Nfia/Ptn/Gpm6b/Ckap5/Gap43/Sox6/Cntn1/Ptprz1	15	225	5.47789	255	3
Figure 3g	GO:0007264	small GTPase mediated signal transduction	0.000562288	Cul3/Eps8/Ralgps2/Itgav/Gpsm2/Ccdc88a/Lpar6/Vav3/Sos2/Cdon/Dock10/Kbtbd7/Lpar4/Rap1a/Dok6/Rab9/Dynlt1b	17	225	4.23093	255	4
Figure 3g	GO:0071560	cellular response to transforming growth factor beta stimulus	0.000562288	Fyn/Pals1/Ptk2/Zeb1/Nr3c1/Fbn2/Itgb8/Creb1/Zeb2/Fbn1/Spred1/Snx25/Sox6	13	225	5.57066	255	5
Figure 3g	GO:0071559	response to transforming growth factor beta	0.000562288	Fyn/Pals1/Ptk2/Zeb1/Nr3c1/Fbn2/Itgb8/Creb1/Zeb2/Fbn1/Spred1/Snx25/Sox6	13	225	5.48224	255	6
Figure 3g	GO:0050767	regulation of neurogenesis	0.000612729	Map2/Psen1/Egfr/Rb1/Ptk2/Serpine2/Plxna2/Zeb2/Sema6d/Tnik/Ppp3ca/Sema3a/Ptn/Cdon/Grm5/Robo2/Ptprz1/Dynlt1b	18	225	3.88008	255	7
Figure 3g	GO:0022612	gland morphogenesis	0.000944854	Cul3/Cd44/Nfib/Lims1/Egfr/Nr3c1/Tnc/Sema3a/Ptn/Fgf1	10	225	6.72602	255	8
Figure 3g	GO:0034329	cell junction assembly	0.00106859	Lims1/Ptk2/Nrxn1/Itgav/Pdlim5/Mpdz/Gpm6b/Gpm6a/Adgrb3/Myo6/Adgrl3/Limch1/Pik3r1/Gap43/Cdh20/Six1/Rap1a	17	225	3.77163	255	9
Figure 3g	GO:1904375	regulation of protein localization to cell periphery	0.00332067	Egfr/Nrxn1/Vamp4/Tnik/Nbea/Gpsm2/Myo5a/Pik3r1/Rap1a	9	225	6.13103	255	10
Figure 3g	GO:0001764	neuron migration	0.00405174	Fyn/Psen1/Ptk2/Nrp2/Sema3a/Chl1/Gpm6a/Zswim6/Adgrl3/Ptprz1	10	225	5.15879	255	11
Figure 3g	GO:0044772	mitotic cell cycle phase transition	0.00405174	Cul3/Arpp19/Nfib/Eps8/Cdk17/Egfr/Mnat1/Rb1/Rrm2b/Ppp3ca/Cdkn2c/Nfia/Cdk14/Cdk5rap2/Usp47	15	225	3.51116	255	12
Figure 3g	GO:1901652	response to peptide	0.00482812	Akt3/Fyn/Psen1/Erbin/Rb1/Ptk2/Creb1/Stxbp3/Ppp3ca/Tcf12/Myo5a/Sos2/Cpeb2/Pik3r1/Grm5	15	225	3.43549	255	13
Figure 3g	GO:0042692	muscle cell differentiation	0.00485145	Meis1/Spag9/Ppp3cb/Rb1/Zeb1/Nr3c1/Megf10/Ppp3ca/Pdlim5/Mef2a/Ank2/Adgrb3/Cdon/Six1/Sox6	15	225	3.42074	255	14
Figure 3g	GO:0050890	cognition	0.00524558	Taco1/Psen1/Egfr/Nrxn1/Creb1/Meis2/Ptn/Chl1/Magt1/Adgrb3/Ckap5/Grm5/Ptprz1	13	225	3.75414	255	15
Figure 3g	GO:0050803	regulation of synapse structure or activity	0.00524558	Fyn/Psen1/Ptk2/Nrxn1/Nrp2/Pdlim5/Ptn/Gpm6a/Adgrb3/Adgrl3/Pik3r1/Six1	12	225	4.02288	255	16
Figure 3g	GO:0050919	negative chemotaxis	0.00524558	Nrp2/Itgav/Sema6d/Sema3a/Robo2	5	225	12.3571	255	17
Figure 3g	GO:0007626	locomotory behavior	0.00562751	Eps8/Meis1/Npas3/Ppp3cb/Chl1/Myo6/Myo5a/Adgrl3/Ckap5/Grm5/Cntn1	11	225	4.31359	255	18
Figure 3g	GO:0050806	positive regulation of synaptic transmission	0.00807298	Psen1/Egfr/Ptk2/Nrxn1/Creb1/Serpine2/Ptn/Ckap5/Mir181a-2/Mir99a/Mirlet7c-1/Mir181b-2	12	225	3.67508	255	19
Figure 3g	GO:0099558	maintenance of synapse structure	0.00871205	Nrxn1/Sema3a/Adgrb3/Adgrl3	4	225	15.1816	255	20
Figure 4z	GO:0048667	cell morphogenesis involved in neuron differentiation	2.73475e-07	Ppfia2/Ptprq/Zdhhc17/Sgk1/Fyn/Pcdh15/Stxbp5/Prkca/Unk/Tbcd/B3gnt2/Bcl11a/Slit3/Tenm2/Cyfip2/Fstl4/Nog/Adam17/Crppa/Foxg1/Tbce/Hecw1/Nrn1/Phactr1/Arhgef28/Zic2/Lrtm1/Mapk8/Atp8a2/Nefm/Slc11a2/Ctnnd2/Sema5a/Sdc2/Matn2/Ext1/Ptk2/Rbfox2/Lrrk2/Pla2g10/Map3k13/Kalrn/Rpl24/Abi3bp/Robo1/Tiam1/Tnfrsf12a/Efna5/Ptprm/Wdr36/Dcc/Myo5b/Mbp/Vldlr/Prkg1/Lgi1/Prex2/Tnr/Tnn/Stau2/Dst/Hecw2/Creb1/Fn1/Epha4/Dock10/S…	125	2381	1.78714	5305	1
Figure 4z	GO:0048812	neuron projection morphogenesis	2.73475e-07	Ppfia2/Syt1/Zdhhc17/Sgk1/Fyn/Wasf1/Stxbp5/Prkca/B3gnt2/Bcl11a/Slit3/Tenm2/Cyfip2/Fstl4/Nog/Adam17/Crppa/Foxg1/Itga1/Tbce/Hecw1/Nrn1/Phactr1/Arhgef28/Zic2/Lrtm1/Mapk8/Atp8a2/Nefm/Slc11a2/Nckap1l/Ctnnd2/Sema5a/Sdc2/Matn2/Ext1/Ptk2/Rbfox2/Lrrk2/Pla2g10/Map3k13/Kalrn/Rpl24/Abi3bp/Robo1/Tiam1/Tnfrsf12a/Ddr1/Efna5/Ptprm/Nrxn1/Rock1/Wdr36/Dcc/Myo5b/Mbp/Vldlr/Prkg1/Lgi1/Prex2/Tnr/Tnn/Stau2/Dst/Hecw2/Creb…	132	2381	1.75001	5305	2
Figure 4z	GO:0032990	cell part morphogenesis	2.73475e-07	Ppfia2/Syt1/Zdhhc17/Sgk1/Fyn/Wasf1/Supv3l1/Stxbp5/Prkca/B3gnt2/Bcl11a/Pnpt1/Slit3/Tenm2/Cyfip2/Fstl4/Nog/Adam17/Crppa/Foxg1/Itga1/Tbce/Hecw1/Nrn1/Phactr1/Ndufs6/Arhgef28/Zic2/Lrtm1/Mapk8/Atp8a2/Nefm/Slc11a2/Nckap1l/Ctnnd2/Sema5a/Sdc2/Matn2/Ext1/Ptk2/Rbfox2/Lrrk2/Pla2g10/Map3k13/Kalrn/Rpl24/Abi3bp/Robo1/Tiam1/Tnfrsf12a/Ddr1/Efna5/Ptprm/Nrxn1/Rock1/Wdr36/Dcc/Myo5b/Mbp/Vldlr/Prkg1/Lgi1/Prex2/Tnr/Tnn…	138	2381	1.72097	5305	3
Figure 4z	GO:0007610	behavior	9.23234e-06	Grm1/Tmbim4/Tafa2/Ahi1/Sgk1/Enpp1/Fig4/Sobp/Grik2/Vip/Pcdh15/Crhr1/Prkca/Sgsh/Uts2r/Gabrg2/Adra1b/Gria1/Nf1/Nog/Ankfn1/Slc8a3/Nrxn3/Tshr/Cartpt/Pde4d/Ndufs4/Hcn1/Tbce/Amph/Homer1/Pde8b/Kcnma1/Chat/Grid1/Gmfb/Atp8a2/Pcdh17/Klhl1/Dach1/Slc11a2/Pde1b/Ctnnd2/Selenop/Oxr1/Tmem74/Ptger4/Ext1/Lrrk2/Gnb1l/Tbx1/Fgf12/Kalrn/Lsamp/Morc1/Grik1/Crebrf/Btbd9/Glp1r/Rcan2/Prkce/Nrxn1/Htr7/Sorcs3/Prex2/Cacna1e/Tn…	135	2381	1.62283	5305	4
Figure 4z	GO:0034330	cell junction organization	1.76613e-05	Ppfia2/Ptprk/Fyn/Wasf1/Bcr/Prkca/Sdk2/Tbcd/Gabrg2/Gria1/Nf1/Asic2/Rps6ka5/Dgkb/Lrfn5/Mdga2/Gphn/Slc8a3/Nrxn3/Dsp/Homer1/Erc2/Lrtm1/Chat/Slc18a3/Grid1/Nrg3/Ptk2b/Pcdh17/Cdhr18/Cdh12/Cdh18/Ctnnd2/Ext1/Ptk2/Cacng2/Lrrk2/Hrg/Kalrn/Abi3bp/Robo1/Tiam1/Cldn6/Pdpk1/Cd2ap/Lrfn2/Crb3/Efna5/Ston1/Nrxn1/Rock1/Mapre2/Mpp7/Myo5b/Sorbs1/Epb41l5/Tnr/Stau2/Dst/Fn1/Epha4/Dock10/Fmn1/Il1b/Cacnb2/Snta1/Cdh4/Gpr158/Z…	138	2381	1.59349	5305	5
Figure 4z	GO:0099537	trans-synaptic signaling	1.88372e-05	Grm1/Ppfia2/Lin7a/Syt1/Enpp1/Fyn/Grik2/Bcr/Syn3/Anks1b/Stxbp5/Crhr1/Prkca/Tenm2/Gabrg2/Gabra6/Gria1/Nf1/Nog/Mir337/Mir540/Mir433/Mir127/Mir434/Dgkb/Slc8a3/Nrxn3/Ston2/Cartpt/Nrn1/Mctp1/Tent2/Homer1/Nalcn/Pxk/Kcnma1/Erc2/Chat/Slc18a3/Mapk8/Grid1/Nrg3/Ptk2b/Adra1a/Pcdh17/Cdhr18/Synpr/Cadps/Ctnnd2/Ptger4/Ext1/Ptk2/Cacng2/Syngr1/Syt10/Lrrk2/Fgf12/Stxbp5l/Grik1/Lnpep/Btbd9/Pde9a/Lrfn2/Arid1b/Dlgap1/Pr…	150	2381	1.5555	5305	6
Figure 4z	GO:0033139	regulation of peptidyl-serine phosphorylation of STAT protein	0.00037542	Pwp1/Ercc6/Ifna9/Ifna12/Gm13271/Gm13283/Gm13272/Ifnz/Gm13276/Gm13277/Gm13275/Ifna7/Ifna11/Ifna6	14	2381	4.36477	5305	7
Figure 4z	GO:0099177	regulation of trans-synaptic signaling	0.000411605	Grm1/Ppfia2/Syt1/Enpp1/Fyn/Grik2/Bcr/Stxbp5/Crhr1/Prkca/Gria1/Nf1/Nog/Mir337/Mir540/Mir433/Mir127/Mir434/Dgkb/Slc8a3/Nrxn3/Nrn1/Mctp1/Tent2/Homer1/Nalcn/Pxk/Erc2/Chat/Slc18a3/Mapk8/Grid1/Nrg3/Ptk2b/Adra1a/Pcdh17/Synpr/Ctnnd2/Ptger4/Ptk2/Cacng2/Syngr1/Lrrk2/Stxbp5l/Grik1/Lnpep/Btbd9/Pde9a/Lrfn2/Dlgap1/Prkce/Nrxn1/Kcnn2/Dcc/Myo5b/Htr7/Lgi1/Sorcs3/Cacna1e/Tnr/Stau2/Kcnh1/Creb1/Epha4/Il1b/Plcb4/Gpr15…	118	2381	1.54953	5305	8
Figure 4z	GO:0098742	cell-cell adhesion via plasma-membrane adhesion molecules	0.00144855	Pcdh15/Sdk2/Tenm2/Fat2/Lrfn5/Mdga2/Pcdh17/Cdhr18/Cdh12/Cdh18/Cadm2/Robo1/Efna5/Ptprm/Nrxn1/Dsc3/Dsc1/Dsg1a/Pcdhb6/Pcdhb8/Mbp/Cdh4/Lrrc4c/Ntng1/Nlgn1/Pcdh18/Slitrk3/Dab1/Ptprd/Cntn6/Grid2/Pvr/Lypd10/Lypd11/Cd177/Tenm4/Cdh3/Cdh13/Unc5d/Nrg1/Palld/Cntn5/Esam/Clstn2	44	2381	2.01542	5305	9
Figure 4z	GO:0018209	peptidyl-serine modification	0.00151419	Sgk1/Hk1/Pwp1/Prkca/Vrk2/Fnip1/Nlk/Rps6ka5/Vrk1/Pde4d/Ercc6/Mapk8/Lats2/Lats2/Angpt1/Lrrk2/Prkdc/Map3k13/Pdpk1/Prkce/Nrxn1/Rock1/Galnt1/Stk32a/Akt3/Smyd3/Camk1g/Poglut2/Prkcq/Aurka/Myo3a/Galnt13/Myo3b/Pkn2/Dclk1/Pdcd10/Mknk1/Mtor/Ripk2/Ifna9/Ifna12/Gm13271/Gm13283/Gm13272/Ifnz/Gm13276/Gm13277/Gm13275/Ifna7/Ifna11/Ifna6/Tek/Lmtk2/Stk32b/Akap9/Paqr3/Met/Hipk2/Eif2ak3/Brsk2/Ntrk3/Tnks/Gpd1l	63	2381	1.77002	5305	10
Figure 4z	GO:0042391	regulation of membrane potential	0.00254511	Kcnmb4/Trdn/Ccn6/Grik2/Ctnna3/Kcnip1/Gabrg2/Gabra6/Gria1/Asic2/Dld/Slc26a3/Slc8a3/Rgs7bp/Ndufs4/Hcn1/Nnt/Nnt/Dsp/Nalcn/Kcnma1/Ptk2b/Adra1a/Rbfox2/Cacng2/Lrrk2/Fgf12/Grik1/Prkce/Nrxn1/Kcnn2/Piezo2/Trpa1/Kcnj9/Rgs7/Kcnk2/Kcnh1/Pid1/Cacnb2/Snta1/Kcnh7/Scn1a/Scn9a/Scn7a/Ppp3ca/Nlgn1/Kcnmb2/Npy2r/Gja5/Rims3/Grik3/Mtor/Unc13b/Cdkn2a/Cux2/Rimbp2/Pclo/Cacna2d1/Slc26a5/Dpp6/Akap9/Gabrb1/Slc4a4/Cacna1c/Gri…	82	2381	1.61409	5305	11
Figure 4z	GO:0007612	learning	0.00330253	Tafa2/Sgk1/Crhr1/Adra1b/Nf1/Nog/Slc8a3/Nrxn3/Amph/Pde8b/Gmfb/Pde1b/Ctnnd2/Kalrn/Glp1r/Nrxn1/Sorcs3/Cacna1e/Tnr/Atp1a2/Creb1/Hrh3/Dbh/Elavl4/Mtor/Slc24a2/Nptx2/Grm7/Hrh1/Cacna1c/Grin2b/Foxp2/Dgki/Cntnap2/Shank2/Grm5/Csmd1/Vdac3/Ndrg4/Clstn2	40	2381	2.01351	5305	12
Figure 4z	GO:0002323	natural killer cell activation involved in immune response	0.00626778	Unc13d/Fcgr4/Ifna9/Ifna12/Gm13271/Gm13283/Gm13272/Ifnz/Gm13276/Gm13277/Gm13275/Ifna7/Ifna11/Ifna6	14	2381	3.3827	5305	13
Figure 4z	GO:0050982	detection of mechanical stimulus	0.00739748	Ptprq/Fyn/Pcdh15/Asic2/Adgrv1/Piezo2/Htr7/Trpa1/Ano3/Mkks/Scn1a/Scn9a/Ttn/Atp2b2/Grin2b/Grm8/Kcnq1/Pkd1l3/Scn10a	19	2381	2.74078	5305	14
Figure 4z	GO:0034329	cell junction assembly	0.00785457	Ptprk/Bcr/Prkca/Sdk2/Tbcd/Gabrg2/Gria1/Asic2/Lrfn5/Mdga2/Nrxn3/Lrtm1/Nrg3/Ptk2b/Pcdh17/Cdhr18/Cdh12/Cdh18/Ctnnd2/Ptk2/Hrg/Abi3bp/Robo1/Cldn6/Pdpk1/Crb3/Efna5/Ston1/Nrxn1/Rock1/Mpp7/Sorbs1/Epb41l5/Stau2/Dst/Fn1/Fmn1/Il1b/Cdh4/Pkn2/Negr1/Nlgn1/Ect2/Cldn11/Slitrk3/Rapgef2/Gja5/Tesk2/Epha7/Gja10/Lingo2/Ptprd/Tek/Patj/Ptpn13/Cux2/Pclo/Cd9/Kcnj8/Cntnap2/Grid2/Lrrtm1/Lrrtm4/Shank2/Tjp1/St8sia2/Ntrk3/Cdh…	78	2381	1.57382	5305	15
Figure 4z	GO:0007269	neurotransmitter secretion	0.00868145	Ppfia2/Lin7a/Syt1/Syn3/Stxbp5/Prkca/Nf1/Nrxn3/Mctp1/Erc2/Slc18a3/Cadps/Ptger4/Syt10/Lrrk2/Stxbp5l/Nrxn1/Cacna1e/Kcnh1/Gpr158/Nlgn1/Rims3/Unc13b/Rph3a/Rimbp2/Pclo/Erc1/Kcnj8/Cadps2/Grm8/Dgki/Mctp2/Sv2b/Unc13c/Htr1b/Snap91	36	2381	1.9882	5305	16
Figure 4z	GO:0099643	signal release from synapse	0.00868145	Ppfia2/Lin7a/Syt1/Syn3/Stxbp5/Prkca/Nf1/Nrxn3/Mctp1/Erc2/Slc18a3/Cadps/Ptger4/Syt10/Lrrk2/Stxbp5l/Nrxn1/Cacna1e/Kcnh1/Gpr158/Nlgn1/Rims3/Unc13b/Rph3a/Rimbp2/Pclo/Erc1/Kcnj8/Cadps2/Grm8/Dgki/Mctp2/Sv2b/Unc13c/Htr1b/Snap91	36	2381	1.9882	5305	17
Figure 4z	GO:0030534	adult behavior	0.0108526	Enpp1/Pcdh15/Crhr1/Gabrg2/Adra1b/Nrxn3/Tshr/Cartpt/Ndufs4/Tbce/Homer1/Kcnma1/Chat/Pcdh17/Klhl1/Oxr1/Fgf12/Kalrn/Grik1/Btbd9/Nrxn1/Prex2/Atp1a2/Epha4/Foxa2/Abhd12/Dbh/Scn1a/Dab1/Tmod1/Sdk1/Adam22/Grm7/Cacna1c/Met/Hipk2/Cntnap2/Shank2	38	2381	1.92285	5305	18
Figure 4z	GO:0070252	actin-mediated cell contraction	0.01391	Ctnna3/Sgcd/Pde4d/Dsp/Emp2/Rock1/Kcnn2/Epb41l5/Atp1a2/Cacnb2/Snta1/Scn1a/Ptger3/Gja5/Pde4b/Pdpn/Cacna2d1/Akap9/Cacna1c/Kcnj8/Abcc9/Kcnq1/Gpd1l/Scn5a	24	2381	2.2966	5305	19
Figure 4z	GO:0048589	developmental growth	0.0158079	Tmtc3/Syt1/Enpp1/Wasf1/Esr1/Pcdh15/Dusp6/Prkar1a/Ikzf1/Bcl11a/Slit3/Wwc1/Adra1b/Cyfip2/Fstl4/Myocd/Nog/Fbln5/Tshr/Pde4d/Fgf10/Tbce/Nrn1/Ndufs6/Mir682/Ercc6/Lats2/Lats2/Atp8a2/Adra1a/9630013A20Rik/Prlr/Rarg/Sema5a/Ghr/Stk3/Dcaf13/Ptger4/Ext1/Col14a1/Ccn4/Ptk2/Prkdc/Tbx1/Map3k13/Kpna1/Robo1/Tiam1/Tnfrsf12a/Ddr1/Efna5/Wdr36/Mex3c/Myo5b/Prkg1/Epb41l5/Rgs2/Tnr/Tnn/Kif26b/Dusp10/Kcnk2/Ercc5/Col3a1/Creb…	121	2381	1.39719	5305	20
Supplementary Fig. 5b	GO:0099536	synaptic signaling	8.57639e-07	Dlgap1/Tnr/Cadps2/Grm1/Lin7a/Gria1/Tshz3/Mctp1/Fgf12/Stxbp5l/Grik1/Nrxn1/Sorbs1/Myo5b/Gria4/Stau2/Fabp5/Gabrb1/Rph3a/Erc1/Grin2b/Atp2b2/Slc7a10/Clstn2/Snap91/Pcdh17/Enpp1/Shank2/Slc24a2/Dgki/Hrh3/Cntnap2/Ptger4/Erc2/Tent2/Adra1a/Tenm2/Grm5/Cacna1c/Sv2b/Ppfia2/Kcnn2/Gabrg3/Grik2/Cacnb2/Dcc/Unc13c/Nrg1/Nrxn3	49	423	2.73404	558	1
Supplementary Fig. 5b	GO:0007610	behavior	3.83074e-06	Atp1a2/Tnr/Grm1/Gria1/Tshr/Pde8b/Pde1b/Fgf12/Grik1/Nrxn1/Tmod1/Dab1/Sgip1/Grin2b/Atp2b2/Aplp2/Clstn2/Pcdh17/Pomk/Enpp1/Shank2/Slc24a2/Sobp/Dgki/Hrh3/Tbce/Cntnap2/Cyp7b1/Ptger4/Mapk10/Crebrf/Prex2/Grm5/Cacna1c/Pcdh15/Dach1/Grik2/Csmd1/Kalrn/Nrg1/Nrxn3	41	423	2.77423	558	2
Supplementary Fig. 5b	GO:0001508	action potential	4.28761e-06	Gria1/Fgf12/Grin2b/Scn7a/Cntnap2/Cacna2d1/Adra1a/Gpd1l/Cacna1c/Kcnip1/Kcnn2/Kcnmb4/Grik2/Cacnb2/Kcnh7/Ctnna3/Dpp6	17	423	5.85337	558	3
Supplementary Fig. 5b	GO:0030534	adult behavior	4.97348e-05	Atp1a2/Tshr/Fgf12/Grik1/Nrxn1/Tmod1/Dab1/Pcdh17/Enpp1/Shank2/Tbce/Cntnap2/Prex2/Cacna1c/Pcdh15/Kalrn/Nrxn3	17	423	4.84205	558	4
Supplementary Fig. 5b	GO:0007612	learning	4.97348e-05	Atp1a2/Tnr/Pde8b/Pde1b/Nrxn1/Grin2b/Clstn2/Shank2/Slc24a2/Dgki/Hrh3/Cntnap2/Grm5/Cacna1c/Csmd1/Kalrn/Nrxn3	17	423	4.81683	558	5
Supplementary Fig. 5b	GO:0099177	regulation of trans-synaptic signaling	4.97348e-05	Dlgap1/Tnr/Grm1/Gria1/Tshz3/Mctp1/Stxbp5l/Grik1/Nrxn1/Myo5b/Gria4/Stau2/Fabp5/Erc1/Grin2b/Atp2b2/Slc7a10/Clstn2/Pcdh17/Enpp1/Shank2/Slc24a2/Dgki/Cntnap2/Ptger4/Erc2/Tent2/Adra1a/Grm5/Sv2b/Ppfia2/Kcnn2/Grik2/Dcc/Unc13c/Nrxn3	36	423	2.66096	558	6
Supplementary Fig. 5b	GO:0001505	regulation of neurotransmitter levels	6.42628e-05	Atp1a2/Cadps2/Lin7a/Mctp1/Pde1b/Stxbp5l/Nrxn1/Rph3a/Erc1/Snap91/Dgki/Hrh3/Ptger4/Erc2/Sv2b/Ppfia2/Unc13c/Nrxn3	18	423	4.43092	558	7
Supplementary Fig. 5b	GO:0050808	synapse organization	0.000174285	Tnr/Gria1/Nrxn1/Sorbs1/St8sia2/Myo5b/Stau2/Sh3gl2/Rph3a/Wasf3/Erc1/Grin2b/Atp2b2/Clstn2/Snap91/Pcdh17/Shank2/Cntnap2/Cntn5/Erc2/Sdk2/Grm5/Ppfia2/Cacnb2/Kalrn/Unc13c/Nrg1/Nrxn3/Sort1	29	423	2.83751	558	8
Supplementary Fig. 5b	GO:0007269	neurotransmitter secretion	0.00019999	Cadps2/Lin7a/Mctp1/Stxbp5l/Nrxn1/Rph3a/Erc1/Snap91/Dgki/Ptger4/Erc2/Sv2b/Ppfia2/Unc13c/Nrxn3	15	423	4.66302	558	9
Supplementary Fig. 5b	GO:0099643	signal release from synapse	0.00019999	Cadps2/Lin7a/Mctp1/Stxbp5l/Nrxn1/Rph3a/Erc1/Snap91/Dgki/Ptger4/Erc2/Sv2b/Ppfia2/Unc13c/Nrxn3	15	423	4.66302	558	10
Supplementary Fig. 5b	GO:0006836	neurotransmitter transport	0.0011874	Atp1a2/Cadps2/Lin7a/Mctp1/Stxbp5l/Nrxn1/Rph3a/Erc1/Snap91/Dgki/Ptger4/Erc2/Sv2b/Ppfia2/Unc13c/Nrxn3	16	423	3.7681	558	11
Supplementary Fig. 5b	GO:0048812	neuron projection morphogenesis	0.00265162	Bcl11a/Aplp1/Tnr/Arhgef28/Nefm/Nckap1l/Nrxn1/St8sia2/Myo5b/Stau2/Dst/Fn1/Sh3gl2/Dab1/Sema3c/Cntn6/Nek3/Aplp2/Snap91/Tbce/Cntnap2/Cntn5/Mbp/Crppa/Prex2/Tenm2/Prkg1/Ppfia2/Dcc/Kalrn/Runx3	31	423	2.31339	558	12
Supplementary Fig. 5b	GO:0120039	plasma membrane bounded cell projection morphogenesis	0.00377233	Bcl11a/Aplp1/Tnr/Arhgef28/Nefm/Nckap1l/Nrxn1/St8sia2/Myo5b/Stau2/Dst/Fn1/Sh3gl2/Dab1/Sema3c/Cntn6/Nek3/Aplp2/Snap91/Tbce/Cntnap2/Cntn5/Mbp/Crppa/Prex2/Tenm2/Prkg1/Ppfia2/Dcc/Kalrn/Runx3	31	423	2.26675	558	13
Supplementary Fig. 5b	GO:0099003	vesicle-mediated transport in synapse	0.00687595	Cadps2/Stxbp5l/Nrxn1/Myo5b/Sh3gl2/Rph3a/Erc1/Snap91/Pcdh17/Lpar1/Erc2/Mapk10/Sv2b/Ppfia2/Unc13c/Nrg1	16	423	3.22382	558	14
Supplementary Fig. 5b	GO:0086003	cardiac muscle cell contraction	0.00720341	Atp1a2/Sgcd/Cacna2d1/Gpd1l/Cacna1c/Kcnn2/Cacnb2/Ctnna3	8	423	6.04465	558	15
Supplementary Fig. 5b	GO:0031644	regulation of nervous system process	0.00775867	Dlgap1/Tnr/Grm1/Fgf12/Grik1/Nrxn1/Fabp5/Wasf3/Grin2b/Cntnap2/Tafa4/Grik2	12	423	3.93267	558	16
Supplementary Fig. 5b	GO:0006939	smooth muscle contraction	0.00787463	Atp1a2/Sulf1/Tshz3/Rgs2/Flt1/Ptger4/Adra1a/Sstr2/Cacna1c/Prkg1	10	423	4.61033	558	17
Supplementary Fig. 5b	GO:0050905	neuromuscular process	0.0118258	Tnr/Tshz3/Pde8b/Fgf12/Nrxn1/Grin2b/Atp2b2/Aplp2/Pomk/Cntnap2/Tmem150c/Pcdh15/Csmd1	13	423	3.46679	558	18
Supplementary Fig. 5b	GO:0019228	neuronal action potential	0.0118258	Gria1/Fgf12/Scn7a/Cntnap2/Kcnmb4/Grik2/Dpp6	7	423	6.34689	558	19
Supplementary Fig. 5b	GO:0098742	cell-cell adhesion via plasma-membrane adhesion molecules	0.0144863	Nrxn1/Dab1/Cntn6/Clstn2/Pcdh17/Cntn5/Pvr/Sdk2/Mbp/Tenm2/Pcdh15/Nrg1/Cadm2	13	423	3.35178	558	20
Supplementary Fig. 5c	GO:0032990	cell part morphogenesis	6.91952e-15	Cdh4/Tiam1/Ddr1/Igf1r/Nfib/Met/Map1s/Stxbp5/Wasf1/Fyn/Supv3l1/Cyfip2/Pnpt1/Ndufs6/Mapk8/Atp8a2/Sema5a/Ctnnd2/Sdc2/Matn2/Ptk2/Robo1/Slc11a2/Tnfrsf12a/Rock1/Vldlr/Creb1/Epha4/Nckap1/Sema6d/Aurka/Atp9a/Skil/Dclk1/Ppp3ca/Epha7/Ptprd/Elavl4/Pdpn/Sema3a/Epha5/Cit/Auts2/Plxna4/Foxp1/Prmt3/Fgfr2/Ednra/Ist1/Ephb1/Fbxw8/Ptprm/Rbfox2/Map3k13/Ankrd27/Zdhhc17/Syt1/Lrrk2/Wdr36/Dock10/Smurf1/Lmtk2/Ss18l1/Megf9/…	88	929	2.81268	1043	1
Supplementary Fig. 5c	GO:0032989	cellular component morphogenesis	6.91952e-15	Cdh4/Tiam1/Ddr1/Igf1r/Nfib/Met/Map1s/Stxbp5/Wasf1/Fyn/Supv3l1/Cyfip2/Pnpt1/Prkar1a/Ndufs6/Mapk8/Atp8a2/Sema5a/Ctnnd2/Sdc2/Matn2/Ptk2/Robo1/Slc11a2/Tnfrsf12a/Rock1/Vldlr/Creb1/Epha4/Nckap1/Sema6d/Tbc1d20/Aurka/Atp9a/Skil/Dclk1/Ppp3ca/Epha7/Ptprd/Elavl4/Pdpn/Sema3a/Epha5/Cit/Auts2/Plxna4/Foxp1/Cd9/Prmt3/Fgfr2/Ednra/Ist1/Ephb1/Fbxw8/Ptprm/Rbfox2/Map3k13/Ankrd27/Zdhhc17/Syt1/Lrrk2/Vps13b/Wdr36/Fig4/D…	95	929	2.66201	1043	2
Supplementary Fig. 5c	GO:0048812	neuron projection morphogenesis	6.24249e-14	Cdh4/Tiam1/Ddr1/Igf1r/Nfib/Met/Map1s/Stxbp5/Wasf1/Fyn/Cyfip2/Mapk8/Atp8a2/Sema5a/Ctnnd2/Sdc2/Matn2/Ptk2/Robo1/Slc11a2/Tnfrsf12a/Rock1/Vldlr/Creb1/Epha4/Nckap1/Sema6d/Aurka/Atp9a/Skil/Dclk1/Ppp3ca/Epha7/Ptprd/Elavl4/Sema3a/Epha5/Cit/Auts2/Plxna4/Foxp1/Prmt3/Fgfr2/Ednra/Ist1/Ephb1/Fbxw8/Ptprm/Rbfox2/Map3k13/Ankrd27/Zdhhc17/Syt1/Lrrk2/Wdr36/Dock10/Smurf1/Lmtk2/Ss18l1/Megf9/Picalm/Myo9a/Itga1/Sin3a/C…	82	929	2.78628	1043	3
Supplementary Fig. 5c	GO:0043087	regulation of GTPase activity	4.30514e-08	Tiam1/Met/Bcr/Evi5/Nf1/Ralgapa1/Net1/Amph/Cblb/Mapre2/Dock9/Epha4/Rgs7/Ralgps2/Mkks/Tbc1d20/Ralgapb/Ect2/Tbck/Mtor/Tbc1d1/Epha5/Plxna4/Rasgef1a/Vav3/Sos2/Dennd1a/Lrrk2/Rapgef6/Dock10/Rap1gap2/Picalm/Myo9a/Rab11fip2/Sgsm1/Tbc1d12/Efna5/Arhgap24/Ntrk3/Ptk2b/Rapgef2/Arhgef10/A930011G23Rik	43	929	3.08737	1043	4
Supplementary Fig. 5c	GO:0034330	cell junction organization	1.47187e-07	Cdh4/Esam/Tiam1/Large1/Pkn2/Igf1r/Insr/Homer1/Bcr/Wasf1/Fyn/Ptprk/Nf1/Rps6ka5/Ctnnd2/Ptk2/Robo1/Pdpk1/Mapre2/Rock1/Epha4/Epb41l5/Snta1/Ect2/Nbea/Epha7/Ptprd/Unc13b/Sema3a/Epha5/Plxna4/Cd9/Prmt3/Tjp1/Fgfr2/Cdh13/Ephb1/Rims3/Ston1/Tesk2/Ptpn13/Mdga2/Dgkb/Lrrk2/Dock10/Tbcd/Picalm/Myo9a/Negr1/Grid1/Cux2/Fmn1/Gpr158/Gphn/Slitrk3/Efna5/Lrrc4c/Prkca/Dlg2/Gja5/Palld/Ntrk3/Ptk2b/Lrrtm1/Pclo/Cd2ap/Ext1/Pat…	74	929	2.19	1043	5
Supplementary Fig. 5c	GO:0022603	regulation of anatomical structure morphogenesis	3.80094e-07	Cdh4/Epn2/Tiam1/Arhgef18/Met/Bcr/Nfe2l2/Akt3/Fyn/Ahi1/Nf1/Fbln5/Erap1/Aggf1/Sema5a/Mtdh/Sdc2/Parvb/Emp2/Ptk2/Prkdc/Robo1/Tnfrsf12a/Bambi/Rock1/Dnmbp/Itgb8/Epha4/Sema6d/Aurka/Skil/Pdcd10/Ppp3ca/Epha7/Ptprd/Mllt3/Pdpn/Sema3a/Pgam5/Cit/Plxna4/Foxp1/Tjp1/Fgfr2/Ednra/Smad1/Ist1/Fbxw8/Ptprm/Map3k13/Ankrd27/Oma1/Epn1/Syt1/Lrrk2/Ago2/Smurf1/Ss18l1/Rbpj/Picalm/Tmem135/Myo9a/Btbd7/Cux2/Hecw2/Tenm4/Nog/Efna…	80	929	2.06208	1043	6
Supplementary Fig. 5c	GO:0000278	mitotic cell cycle	7.53756e-07	Foxm1/Pkn2/Igf1r/Insr/Tpr/Pole/Nfib/Met/Ncapg/Ppp2r5c/Map1s/Tube1/Ppp1r12a/Cdk17/Dpf3/Exoc2/Pibf1/Cep97/Prkdc/Ccny/Rock1/Mybl1/Ppp6c/Bub1/Gins1/Fam110a/Tpx2/Aurka/E2f5/Dsn1/Ect2/Ppp3ca/Ubxn2b/Pdpn/Tal1/Cdk14/Anapc4/Ankle2/Cit/Mad1l1/Exoc4/Casp2/Fgfr2/Tacc2/Stk33/Ednra/Cdc14b/Ttc28/Foxn3/Map9/Stag1/Ckap2/Tbcd/Cdk5rap2/Firrm/Usp22/Sin3a/Hecw2/Cdkn2a/Trim39/Haspin/Prkca/Usp29/Adam17/Brsk2/Dis3l2/Ank…	75	929	2.08508	1043	7
Supplementary Fig. 5c	GO:0031344	regulation of cell projection organization	8.33084e-07	Cdh4/Tiam1/Ddr1/Igf1r/Homer1/Met/Nfe2l2/Fyn/Ahi1/Acsl6/Nf1/Atp8a2/Sema5a/Sdc2/Cep97/Ptk2/Robo1/Tnfrsf12a/Vldlr/Epha4/Nckap1/Sema6d/Skil/Ppp3ca/Epha7/Ptprd/Elavl4/Pdpn/Sema3a/Mtor/Cit/Auts2/Plxna4/Itpr1/Xylt1/Ist1/Ptpn9/Fbxw8/Map3k13/Ankrd27/Lrrk2/Ndrg4/Fig4/Smurf1/Rap1gap2/Ss18l1/Picalm/Myo9a/Negr1/Cux2/Hecw2/Efna5/Adamts16/Lrrc4c/Adam17/Brsk2/Yap1/Fut9/Arhgap24/Ntrk3/Ptk2b/Ntm/Intu/Rapgef2/Ctnna…	69	929	2.15533	1043	8
Supplementary Fig. 5c	GO:0035239	tube morphogenesis	8.86042e-07	Epn2/Rarg/Foxm1/Tulp3/Rin2/Ddr1/Hdac9/Elk3/Nfib/Met/Ubp1/Klhl3/Nfe2l2/Akt3/Nf1/Fbln5/Cdk20/Erap1/Aggf1/Sema5a/Mtdh/Angpt1/Emp2/Trp63/Ptk2/Robo1/Tnfrsf12a/Rock1/Itgb8/Atp5f1b/Epha4/Epb41l5/Kif26b/Nckap1/Pdcd10/Epha7/Pdpn/Tal1/Ski/Epha5/Tgfbr3/Foxp1/Tjp1/Pik3c2a/Fgfr2/Ednra/Eif2ak3/Smad1/Cdh13/St14/Ephb1/Ptprm/Vav3/Epn1/Twist1/Tmtc3/Ago2/Rbpj/Hs2st1/Mthfd1l/Zic5/Fmn1/Nog/Lemd3/Adamts16/Prkca/Yap1/A…	79	929	2.02158	1043	9
Supplementary Fig. 5c	GO:0043547	positive regulation of GTPase activity	1.10335e-06	Tiam1/Bcr/Evi5/Nf1/Ralgapa1/Net1/Amph/Mapre2/Dock9/Rgs7/Ralgps2/Tbc1d20/Ralgapb/Ect2/Tbck/Tbc1d1/Rasgef1a/Sos2/Dennd1a/Rapgef6/Dock10/Rap1gap2/Picalm/Myo9a/Rab11fip2/Sgsm1/Tbc1d12/Arhgap24/Ntrk3/Ptk2b/Rapgef2/Arhgef10/A930011G23Rik	33	929	3.23096	1043	10
Supplementary Fig. 5c	GO:0048589	developmental growth	2.24109e-06	Cdh4/Rarg/Tiam1/Ddr1/Large1/Igf1r/Insr/Ankrd26/Wwc1/Wasf1/Dusp6/Cyfip2/Prkar1a/Fbln5/Ndufs6/Pde4d/Atp8a2/Sema5a/Dcaf13/Col14a1/Ptk2/Prkdc/Robo1/Kpna1/Tnfrsf12a/Creb1/Ercc5/Epb41l5/Kif26b/Sema6d/Mkks/Gins1/Aurka/Dclk1/Epha7/Sema3a/Mtor/Tgfbr3/Auts2/Plxna4/Foxp1/Cd9/Fgfr2/Gpat4/Ednra/Smad1/Ist1/Map3k13/Syt1/Tmtc3/Siah1a/Mex3c/Kmt2c/Wdr36/Smurf1/Rbpj/Picalm/Dusp10/Sin3a/Fmn1/Tenm4/Nog/Efna5/Adra1b/Y…	70	929	2.07163	1043	11
Supplementary Fig. 5c	GO:0046777	protein autophosphorylation	2.9032e-06	Grk5/Ddr1/Igf1r/Insr/Met/Bcr/Nlk/Fyn/Vrk1/Ptk2/Hspa9/Stk17b/Epha4/Epha7/Mknk1/Mtor/Fgfr2/Stk33/Eif2ak3/Ephb1/Map3k13/Melk/Lrrk2/Oxsr1/Hk1/Sik2/Lmtk2/Prkca/Ptk2b/Vrk2/Riok2	31	929	3.22644	1043	12
Supplementary Fig. 5c	GO:0007264	small GTPase mediated signal transduction	9.23292e-06	Foxm1/Tiam1/Arhgef18/Met/Bcr/Abca1/Wasf1/Srgap1/Nf1/Ralgapa1/Net1/Robo1/Mapre2/Rock1/Dock9/Cdc42bpa/Ralgps2/Psd4/Nckap1/Ralgapb/Pdpn/Auts2/Rasgef1a/Ednra/Cdh13/Vav3/Farp2/Sos2/Scai/Dennd1a/Syde2/Rapgef6/Dock10/Rap1gap2/Dock3/Adra1b/Rab39/Arhgap24/Dock1/Cd2ap/Rapgef2/Ywhaq/A930011G23Rik	43	929	2.49448	1043	13
Supplementary Fig. 5c	GO:0010631	epithelial cell migration	1.23493e-05	Rin2/Gab2/Pkn2/Hdac9/Met/Nfe2l2/Akt3/Ptprr/Nf1/Sema5a/Angpt1/Emp2/Ptk2/Fstl1/Robo1/Pdpk1/Mapre2/Rock1/Atp5f1b/Epb41l5/Pdcd10/Sema3a/Mtor/Tgfbr3/Foxp1/Pik3c2a/Cdh13/Ptprm/Plcg2/Dusp10/Prkce/Lemd3/Prkca/Adam17/Dock1/Ptk2b	36	929	2.72705	1043	14
Supplementary Fig. 5c	GO:0043161	proteasome-mediated ubiquitin-dependent protein catabolic process	1.32049e-05	Fbxo9/Klhl3/Nfe2l2/Kctd5/Ppp2r5c/Xpo1/Erlec1/Canx/Rffl/Mapk8/Fbxl3/Dcaf13/Bfar/Rbck1/Aurka/Ubxn2b/Anapc4/Herc2/Sh3rf1/Eif2ak3/Cul5/Stt3b/Trib1/Fbxl2/Trib3/Fbxw8/Zyg11b/Lrrk2/Topors/Siah1a/Wdr26/Smurf1/Psmd7/Klhl42/Ufl1/Cop1/Fbxo2/Nhlrc3/Trim39/Spsb4/Ltn1/Sec61b/Cd2ap/Rnf217	44	929	2.42742	1043	15
Supplementary Fig. 5c	GO:0090132	epithelium migration	1.34255e-05	Rin2/Gab2/Pkn2/Hdac9/Met/Nfe2l2/Akt3/Ptprr/Nf1/Sema5a/Angpt1/Emp2/Ptk2/Fstl1/Robo1/Pdpk1/Mapre2/Rock1/Atp5f1b/Epb41l5/Pdcd10/Sema3a/Mtor/Tgfbr3/Foxp1/Pik3c2a/Cdh13/Ptprm/Plcg2/Dusp10/Prkce/Lemd3/Prkca/Adam17/Dock1/Ptk2b	36	929	2.71047	1043	16
Supplementary Fig. 5c	GO:0048588	developmental cell growth	1.79366e-05	Cdh4/Rarg/Tiam1/Ddr1/Wasf1/Cyfip2/Sema5a/Dcaf13/Col14a1/Robo1/Tnfrsf12a/Sema6d/Aurka/Dclk1/Epha7/Sema3a/Mtor/Auts2/Plxna4/Foxp1/Ednra/Ist1/Map3k13/Syt1/Mex3c/Wdr36/Smurf1/Picalm/Sin3a/Efna5/Adra1b/Ntrk3/Ext1	33	929	2.80905	1043	17
Supplementary Fig. 5c	GO:0010632	regulation of epithelial cell migration	1.79366e-05	Rin2/Gab2/Hdac9/Met/Nfe2l2/Akt3/Ptprr/Nf1/Sema5a/Angpt1/Emp2/Ptk2/Pdpk1/Mapre2/Atp5f1b/Epb41l5/Pdcd10/Sema3a/Mtor/Tgfbr3/Foxp1/Pik3c2a/Ptprm/Plcg2/Dusp10/Prkce/Prkca/Adam17/Dock1/Ptk2b	30	929	2.98442	1043	18
Supplementary Fig. 5c	GO:0060560	developmental growth involved in morphogenesis	1.88468e-05	Cdh4/Rarg/Tiam1/Ddr1/Wasf1/Cyfip2/Sema5a/Robo1/Tnfrsf12a/Epb41l5/Kif26b/Sema6d/Aurka/Dclk1/Epha7/Sema3a/Auts2/Plxna4/Fgfr2/Ednra/Ist1/Map3k13/Syt1/Tmtc3/Wdr36/Smurf1/Picalm/Sin3a/Fmn1/Efna5/Yap1/Ntrk3/Ext1	33	929	2.79943	1043	19
Supplementary Fig. 5c	GO:0007167	enzyme-linked receptor protein signaling pathway	2.06494e-05	Epn2/Tiam1/Ddr1/Igf1r/Insr/Ankrd26/Met/Bcr/Nlk/Wasf1/Fyn/Ptprk/Ahi1/Ptprr/Osbpl8/Cyfip2/Hivep1/Angpt1/Shcbp1/Ptk2/Cblb/Fstl1/Robo1/Lnpep/Pdpk1/Bambi/Itgb8/Creb1/Epha4/Zgpat/Skil/Nceh1/Epha7/Ski/Epha5/Tgfbr3/Fgfr2/Eif2ak3/Smad1/Cdh13/Ephb1/Ctdspl2/Ston1/Sos2/Zdhhc17/Ndrg4/Sik2/Pmepa1/Trps1/Smurf1/Kif16b/Lmtk2/Rbpj/Arid4b/Itga1/Sin3a/Pid1/Spred2/Nog/Lemd3/Efna5/Prkca/Adam17/Ghr/Ide/Anks1b/Ntrk3/Ptk…	75	929	1.87847	1043	20
Supplementary Fig. 5d	GO:0030198	extracellular matrix organization	6.11653e-06	Cav2/Fap/Loxl3/Hpn/Fkbp10/Fgfr4/Nid1/Fbln1/Ihh/P3h4/Optc/Gfod2/Adamtsl4/Matn4/Lama2/Itgb3/Papln/Lcp1/Col2a1/Ccdc80/App/Adamts1/Adamts5/Smoc2/Vit/Cyp1b1/Cflar/Col5a2/Col9a1/Ddr2/Itga8/Col5a1/Creb3l1/Cst3/Col9a3/Mmp24/Ccn1/Fktn/Col9a2/Dnajb6/Dmp1/Adamts9/Col4a1/Mmp2/Mmp15/Crispld2/Agt/Ets1/Anxa2/Loxl1/Kif9/Nphp3/Lama1/Phldb2/Qsox1/Pomt2/Scara3/Prickle1/Olfml2b/Mfap4/Egflam/Ecm2/Zfp469/Wdr72/Adamts6…	77	2761	1.99307	4106	1
Supplementary Fig. 5d	GO:0045229	external encapsulating structure organization	6.11653e-06	Cav2/Fap/Loxl3/Hpn/Fkbp10/Fgfr4/Nid1/Fbln1/Ihh/P3h4/Optc/Gfod2/Adamtsl4/Matn4/Lama2/Itgb3/Papln/Lcp1/Col2a1/Ccdc80/App/Adamts1/Adamts5/Smoc2/Vit/Cyp1b1/Cflar/Col5a2/Col9a1/Ddr2/Itga8/Col5a1/Creb3l1/Cst3/Col9a3/Mmp24/Ccn1/Fktn/Col9a2/Dnajb6/Dmp1/Adamts9/Col4a1/Mmp2/Mmp15/Crispld2/Agt/Ets1/Anxa2/Loxl1/Kif9/Nphp3/Lama1/Phldb2/Qsox1/Pomt2/Scara3/Prickle1/Olfml2b/Mfap4/Egflam/Ecm2/Zfp469/Wdr72/Adamts6…	77	2761	1.9869	4106	2
Supplementary Fig. 5d	GO:0043062	extracellular structure organization	6.11653e-06	Cav2/Fap/Loxl3/Hpn/Fkbp10/Fgfr4/Nid1/Fbln1/Ihh/P3h4/Optc/Gfod2/Adamtsl4/Matn4/Lama2/Itgb3/Papln/Lcp1/Col2a1/Ccdc80/App/Adamts1/Adamts5/Smoc2/Vit/Cyp1b1/Cflar/Col5a2/Col9a1/Ddr2/Itga8/Col5a1/Creb3l1/Cst3/Col9a3/Mmp24/Ccn1/Fktn/Col9a2/Dnajb6/Dmp1/Adamts9/Col4a1/Mmp2/Mmp15/Crispld2/Agt/Ets1/Anxa2/Loxl1/Kif9/Nphp3/Lama1/Phldb2/Qsox1/Pomt2/Scara3/Prickle1/Olfml2b/Mfap4/Egflam/Ecm2/Zfp469/Wdr72/Adamts6…	77	2761	1.98077	4106	3
Supplementary Fig. 5d	GO:0140236	translation at presynapse	4.62963e-05	Rpl13/Rps15a/Rps24/Rpl14/Rpl6/Rpl28/Rpl37/Rpl27a/Rpl9/Rpl29/Rpl38/Rpl36/Rpl23a/Rpl5/Rpl35a/Rps12/Rpl34/Rpl27/Rps28/Rpl23/Rpl13a	21	2761	3.724	4106	4
Supplementary Fig. 5d	GO:0044283	small molecule biosynthetic process	0.000645183	Akr1b1/Abhd3/Gstm7/Eno2/Mri1/Fgfr4/Mlxipl/Ggt5/Abhd1/Hmgcll1/Prox1/Apip/Pgam1/Qdpr/Aldoc/Pltp/Pnpo/Hsd17b1/Pdk4/Moxd1/Pcbd1/Plek/Ippk/Sptlc1/Pcbd2/Qng1/Hmgcr/Elovl7/Dab2/Amacr/Myh9/C1qtnf12/Cyp39a1/Sik1/Lhcgr/Ip6k3/Anxa1/Rbp4/Hoga1/Car5a/Rdh10/Coq8a/Atf3/Mgst3/Gatm/Sord/Acss1/Acss2/Hmgcs2/Pmvk/Cth/Hacd4/Scp2/Mecr/Acot7/H6pd/Pgm2/Spp1/Sdsl/Aass/Tbxas1/Bcat1/Dgat2/Dkk3/Dkkl1/Ndufab1/Uros/Got2/Gpt2/…	111	2761	1.57606	4106	5
Supplementary Fig. 5d	GO:0019752	carboxylic acid metabolic process	0.00309296	Slc7a7/Akr1b1/Abhd3/As3mt/Gstm7/Eno2/Crabp2/Mri1/Fgfr4/Mlxipl/Ggt5/Hyi/Actn3/Abhd1/Cpt1c/Hmgcll1/Prox1/Acaa1b/Apip/Odc1/Pgam1/Cyp2j9/Qdpr/Aldoc/Pdk4/Pex7/Pcbd1/Ddc/Aldh1l2/Appl2/Cygb/Arg2/Pfkp/Mrs2/Elovl7/Hacl1/Cryl1/Ephx2/Amacr/Dgat1/Pdxdc1/Ehhadh/St6gal1/App/Mpc1/Aars2/Cyp39a1/Cyp1b1/Cyp4f14/Me2/Slc27a6/Asrgl1/Anxa1/Carnmt1/Acsl5/Cyp2c55/Gsto2/Slc16a3/Hoga1/Hexa/Dhtkd1/Adhfe1/Rdh10/Atic/Thap4/S…	166	2761	1.40036	4106	6
Supplementary Fig. 5d	GO:0019637	organophosphate metabolic process	0.00718025	Ckb/Slc25a42/Abhd3/Sult2b1/Rab23/Ndufs3/Ampd3/Atp5mc1/Pgam1/Chp1/Pigl/Hsd11b1/Atp5f1e/Nt5c3b/Aldoc/Pnpo/Pdk4/Smpdl3a/Enpp3/Ndufa12/Socs2/Plek/Aldh1l2/Prpsap2/Cox11/Abca8b/Adcy3/Efr3b/Galr2/Pld2/Pygl/Pfkp/Gpld1/Ippk/Sptlc1/Adcy2/Hmgcr/Nudt13/Cryl1/Adcy8/Myh9/Dgat1/Gpaa1/Naprt/Adcy5/Ehhadh/Dgkg/Mpc1/Pla2g7/Ndufv3/Lhcgr/Ip6k3/Nudt12/Me2/Papss2/Acsl5/Pfkfb4/Pikfyve/Inpp4a/Plcd4/Atic/Inpp5d/Dbi/Pik3c2…	156	2761	1.39358	4106	7
Supplementary Fig. 5d	GO:0070286	axonemal dynein complex assembly	0.0108405	Dnah2/Odad4/Zmynd10/Dnah1/Ccdc103/Ccdc39/Dnaaf1/Ccdc40/Odad1/Ttc12/Daw1/Dnaaf3/Lrrc61/Drc1/Dnah7a	15	2761	3.29	4106	8
Supplementary Fig. 5d	GO:1901137	carbohydrate derivative biosynthetic process	0.0108405	Slc25a42/Ndufs3/Ampd3/Atp5mc1/Derl3/Pgam1/St3gal1/Chp1/Pigl/Atp5f1e/Pdk4/Ndufa12/Tnip1/Prpsap2/Cox11/Adcy3/Pygl/Galnt16/Gcnt2/B4galt7/Adcy2/Qng1/Cryl1/Extl3/Adcy8/Gpaa1/Adcy5/St6gal1/Mpc1/Ndufv3/Papss2/Acsl5/Hexa/St8sia5/B3gat2/Atic/Itm2c/Vangl2/Uck2/Adcy10/Nme7/Soat1/Chst1/Sord/Acss1/Acss2/Npr1/Gucy1b1/Fktn/Vcp/Ndufs5/A3galt2/Acot7/Pgm2/Dck/Tmtc1/Ndufab1/Jak3/Necab2/Chst5/Ldhd/Nt5e/Ndufb7/Pomt2/…	110	2761	1.47398	4106	9
Supplementary Fig. 5d	GO:0016054	organic acid catabolic process	0.0108405	Abhd3/Abhd1/Hmgcll1/Acaa1b/Qdpr/Pex7/Aldh1l2/Arg2/Hacl1/Cryl1/Ehhadh/Cyp39a1/Cyp4f14/Asrgl1/Acsl5/Slc16a3/Hoga1/Hexa/Adhfe1/Scly/Dbi/Sord/Lpin3/Bdh2/Scp2/Acot7/Acad10/Sdsl/Aass/Aldh1l1/Bcat1/Got2/Ldhd/Acad8/Amt/Ilvbl/Gcsh/Decr2/Acaa2/Irs2/Arsb/Acad12/Npl/Gls2/Idnk/Gnpda1/Hadhb/Ddo/Mthfs/Gad1/Cyp4f15/Cyp4f40	52	2761	1.79092	4106	10
Supplementary Fig. 5d	GO:0046395	carboxylic acid catabolic process	0.0108405	Abhd3/Abhd1/Hmgcll1/Acaa1b/Qdpr/Pex7/Aldh1l2/Arg2/Hacl1/Cryl1/Ehhadh/Cyp39a1/Cyp4f14/Asrgl1/Acsl5/Slc16a3/Hoga1/Hexa/Adhfe1/Scly/Dbi/Sord/Lpin3/Bdh2/Scp2/Acot7/Acad10/Sdsl/Aass/Aldh1l1/Bcat1/Got2/Ldhd/Acad8/Amt/Ilvbl/Gcsh/Decr2/Acaa2/Irs2/Arsb/Acad12/Npl/Gls2/Idnk/Gnpda1/Hadhb/Ddo/Mthfs/Gad1/Cyp4f15/Cyp4f40	52	2761	1.79092	4106	11
Supplementary Fig. 5d	GO:0003351	epithelial cilium movement involved in extracellular fluid movement	0.0140916	Odad4/Dnah1/Cfap54/Ccdc103/Aqp4/Adcy10/Nme7/Ccdc39/Stk36/Nme5/Cfap221/Spag6/Ccdc40/Cfap43/Spag16/Daw1	16	2761	3.03079	4106	12
Supplementary Fig. 5d	GO:0044282	small molecule catabolic process	0.0148324	Abhd3/Eno2/Actn3/Abhd1/Hmgcll1/Acaa1b/Qdpr/Pex7/Aldh1l2/Arg2/Pfkp/Hacl1/Cryl1/Ehhadh/Cbr3/Cyp39a1/Cyp4f14/Asrgl1/Aldh1a7/Acsl5/Slc16a3/Hoga1/Hexa/Adhfe1/Scly/Dbi/Adcy10/Sord/Lpin3/Bdh2/Scp2/Acot7/Acad10/Sdsl/Aass/Aldh1l1/Bcat1/Got2/Ldhd/Acad8/Pkm/Amt/Ilvbl/Dpyd/Gcsh/Galm/Gpi1/Decr2/Acaa2/Scarb1/Irs2/Arsb/Acad12/Npl/Gls2/Glb1/Idnk/Gnpda1/Gapdh/Hadhb/Eno3/Ddo/Eno1/Mthfs/Pnp2/Gad1/Cyp4f15/Cyp4f40/Pnp	69	2761	1.62455	4106	13
Supplementary Fig. 5d	GO:0006858	extracellular transport	0.0282197	Odad4/Dnah1/Cfap54/Ccdc103/Aqp4/Adcy10/Nme7/Ccdc39/Stk36/Nme5/Cfap221/Spag6/Ccdc40/Cfap43/Spag16/Daw1	16	2761	2.83733	4106	14
Supplementary Fig. 5d	GO:0042391	regulation of membrane potential	0.0282949	Gabra2/Cd36/Bid/Slc1a6/Gabrb2/Dynll1/Cntnap1/Mpp2/Ywhah/Scn1b/Ubb/Hcn2/Ntsr2/Nrcam/Igsf11/Cxadr/App/Gabrr2/Slc29a1/Dsc2/Gna14/Fgf14/Smad7/Gpr35/Bok/Cnih3/Adcy10/Grin1/Pex5l/Casq2/Kcnc4/Glrb/Vcp/Kcnab2/Prkcz/Gabra4/Tacr1/Tspan9/Myh14/Agt/Bco2/Slc8b1/Chrm1/Rangrf/Atp1a1/Gabrb3/Kcnk1/Igsf9b/Rims4/Adrb1/Kcnh4/Chrna5/Kcnc2/Dcdc2a/Fxyd1/Stox1/Nos1ap/Shank1/Ptpn3/Grin3a/Atp1a3/Chrnb1/Rims1/Slc24a4/Ssh1/…	88	2761	1.49379	4106	15
Supplementary Fig. 5d	GO:0005980	glycogen catabolic process	0.0345768	Pygl/Phkg1/Gaa/Rb1cc1/Adcy10/Pgm2/Pygm/Adrb1/Ppp1r3b/Ppp1r3c/Ppp1r3e	11	2761	3.5262	4106	16
Supplementary Fig. 5d	GO:0043583	ear development	0.0345768	Tbx2/Cdh1/Hpn/Cdkn1b/Gabrb2/Prox1/Eya4/Gata2/Gata3/Abr/Tbx3/Ttc8/Ror2/Cxcl14/Fzd6/Osr2/Col2a1/Six2/Tmc1/Rdh10/Eya1/Atg4b/Vangl2/Prrx1/Itga8/Kcnq4/Ephb2/Gsdme/Myo7a/Bmper/Gabrb3/Mks1/Six4/Gbx2/Ripor2/Igfbp7/Stox1/Mycn/Tecta/Myo15a/Slitrk6/Fat4/Gli2/Bdnf/Tsku/Six1/Cthrc1/Gabra5/Rpl38/Bcl2/H2-K1/Pjvk	52	2761	1.68639	4106	17
Supplementary Fig. 5d	GO:0031589	cell-substrate adhesion	0.0345768	Itga3/Cd36/Bcam/Col26a1/Bcan/Nid1/Fbln1/Actn3/Cd34/Itgb3/Gcnt2/Nid2/Plau/Sorbs3/Dab2/Myh9/Rhpn1/Ccdc80/Itgb5/St6gal1/Ccl25/Smoc2/Vit/Lims2/Fermt3/Itga7/Cd63/Itga8/Tyro3/Ccn1/Prkcz/Spp1/Dmp1/Adamts9/Itgal/Gas6/Thsd1/Cdh11/Bcar1/Agt/Thy1/Cspg5/Cripto/Phldb2/Micall2/Tecta/Acer2/Srcin1/Itga9/Cdk6/Fzd7/Egflam/Ecm2/Zfp469/Whamm/Rpl29/Vwc2/Epha3/Cntn2/Bcl2/Spock2/Frem1/Actg1/Kdr/Fbln2/Lgals1/Itgad/Bves/…	69	2761	1.56275	4106	18
Supplementary Fig. 5d	GO:0009251	glucan catabolic process	0.0427103	Pygl/Phkg1/Gaa/Rb1cc1/Adcy10/Pgm2/Pygm/Adrb1/Ppp1r3b/Ppp1r3c/Ppp1r3e	11	2761	3.3956	4106	19
Supplementary Fig. 5d	GO:0010954	positive regulation of protein processing	0.0427103	Hpn/Timm23/Nkd2/Myh9/Clec3b/Rhbdd1/Gsn/Spon1/Ccbe1/Timm17a/Eno1	11	2761	3.3956	4106	20
