# Supplementary material
Source: Research Square preprint supplement (doi:10.21203/rs.3.rs-9927928/v1)
Supplement: Supplementary file 5 [file 8d555e2da1b284ab726d3538.xlsx]

## Sheet: Suppl Table 5
Supplementary Table 5. Allele-resolved GPSeq scores and RNA-seq counts for X-linked genes in mNPC clone 5.
Gene Name	Ensembl Id	Gene Biotype	Genomic bin	Normalized RNA-seq counts per gene (B6 allele)	Normalized RNA-seq counts per gene (CAST allele)	Log2FC Counts	TPM B6	TPM CAST	rGS B6	rGS CAST	delta rGS	Allelic Expression Status	Chromosome Type	XCI Escapee Status on Xi (CAST)
0610009L18Rik	ENSMUSG00000043644.7	lncRNA	chr11_120200000	43.3783	48.7309	-0.1514	12.4588	13.6078	0.9836	0.9855	-0.0019	biallelic	Autosomes	.
0610025J13Rik	ENSMUSG00000046683.18	lncRNA	chr4_98200000	9.81928	11.4364	-0.1494	0.6877	0.7787	0.7424	0.7449	-0.0025	biallelic	Autosomes	.
0610030E20Rik	ENSMUSG00000058706.6	protein_coding	chr6_72300000	726.893	636.723	0.1897	105.98	90.2574	0.7849	0.9867	-0.2019	biallelic	Autosomes	.
0610038B21Rik	ENSMUSG00000097882.5	lncRNA	chr8_78250000	48.6577	6.09885	2.2734	1.7101	0.2084	0.7329	0.6374	0.0955	skewed:B6	Autosomes	.
0610040B10Rik	ENSMUSG00000089889.5	lncRNA	chr5_143300000	230.476	175.825	0.381	53.9035	39.9808	0.8283	0.718	0.1102	biallelic	Autosomes	.
0610040F04Rik	ENSMUSG00000087341.6	lncRNA	chr6_108550000	34.2731	60.2431	-0.7323	0.3438	0.5875	0.7423	0.5771	0.1653	biallelic	Autosomes	.
1010001B22Rik	ENSMUSG00000097863.3	lncRNA	chr5_110100000	26.2654	12.4796	0.8389	2.4	1.1087	0.6184	0.3432	0.2752	biallelic	Autosomes	.
1110002J07Rik	ENSMUSG00000097134.4	lncRNA	chr10_66700000	126.236	271.971	-1.0776	13.2102	27.6712	0.877	0.6173	0.2598	biallelic	Autosomes	.
1110002L01Rik	ENSMUSG00000071456.9	lncRNA	chr12_3450000	402.102	133.306	1.5575	14.3398	4.6221	0.8916	0.7605	0.1311	skewed:B6	Autosomes	.
1110004F10Rik	ENSMUSG00000030663.13	protein_coding	chr7_115650000	757.946	756.383	0.003	9.7909	9.4996	0.7864	0.5973	0.189	biallelic	Autosomes	.
1110006O24Rik	ENSMUSG00000107121.4	lncRNA	chr5_115750000	38.4963	62.1092	-0.6256	39.718	62.3023	0.7849	0.7903	-0.0054	biallelic	Autosomes	.
1110015O18Rik	ENSMUSG00000098659.10	lncRNA	chr3_4850000	36.9127	24.5628	0.5036	1.7175	1.1111	0.1921	0.2734	-0.0813	biallelic	Autosomes	.
1110019D14Rik	ENSMUSG00000097616.10	lncRNA	chr6_13800000	197.473	39.2205	2.1949	0.805	0.1554	0.5701	0.3373	0.2328	skewed:B6	Autosomes	.
1110020A21Rik	ENSMUSG00000097047.4	lncRNA	chr17_85200000	43.4255	46.7661	-0.0962	0.8864	0.9281	0.5271	0.561	-0.0339	biallelic	Autosomes	.
1110038B12Rik	ENSMUSG00000092203.10	lncRNA	chr17_35100000	1513.72	1070.05	0.4984	58.1015	39.9324	0.9371	0.8421	0.095	biallelic	Autosomes	.
1110038F14Rik	ENSMUSG00000063236.7	protein_coding	chr15_76800000	2640.46	2070.24	0.3502	907.721	691.945	0.941	0.8544	0.0866	biallelic	Autosomes	.
1110059E24Rik	ENSMUSG00000035171.10	protein_coding	chr19_21600000	318.737	192.545	0.7126	3.7754	2.2174	0.8254	0.6654	0.1601	biallelic	Autosomes	.
1110059G10Rik	ENSMUSG00000032551.8	protein_coding	chr9_122750000	104.292	117.873	-0.169	14.9999	16.4827	0.5752	0.5701	0.0051	biallelic	Autosomes	.
1110065P20Rik	ENSMUSG00000078570.11	protein_coding	chr4_124700000	26.4208	30.8378	-0.1898	10.6152	12.046	0.8107	0.8687	-0.058	biallelic	Autosomes	.
1190005I06Rik	ENSMUSG00000043687.17	protein_coding	chr8_121300000	18.8911	34.3252	-0.719	0.4115	0.7269	0.8287	0.896	-0.0673	biallelic	Autosomes	.
1300014J16Rik	ENSMUSG00000112545.4	lncRNA	chr12_80150000	5.83215	11.01	-0.5637	0.6997	1.2843	0.9523	0.9338	0.0185	biallelic	Autosomes	.
1500002C15Rik	ENSMUSG00000096221.5	lncRNA	chr4_155800000	44.2398	129.713	-1.452	6.8796	19.6114	0.8627	0.9439	-0.0812	skewed:CAST	Autosomes	.
1500009L16Rik	ENSMUSG00000087651.4	protein_coding	chr10_83550000	459.989	506.714	-0.1381	9.8017	10.4978	0.8011	0.772	0.0291	biallelic	Autosomes	.
1500015A07Rik	ENSMUSG00000098702.3	lncRNA	chr18_61850000	85.0256	64.6362	0.3705	7.577	5.6002	0.8287	0.7363	0.0924	biallelic	Autosomes	.
1500015L24Rik	ENSMUSG00000094732.5	lncRNA	chr19_20400000	13.4897	16.3705	-0.2089	0.0948	0.1119	0.5106	0.4374	0.0732	biallelic	Autosomes	.
1500026H17Rik	ENSMUSG00000097383.4	lncRNA	chr10_89500000	24.4538	32.5049	-0.3486	1.3611	1.759	0.5512	0.4139	0.1373	biallelic	Autosomes	.
1500032F14Rik	ENSMUSG00000117718.4	lncRNA	chr19_4250000	11.503	19.812	-0.5883	0.234	0.3918	0.9962	0.9435	0.0527	biallelic	Autosomes	.
1600010M07Rik	ENSMUSG00000101585.9	lncRNA	chr7_109700000	65.4735	82.8253	-0.3176	0.3642	0.448	0.8287	0.9887	-0.16	biallelic	Autosomes	.
1600014C10Rik	ENSMUSG00000054676.18	protein_coding	chr7_37850000	140.855	200.679	-0.4959	8.3448	11.5591	0.7542	0.6855	0.0687	biallelic	Autosomes	.
1600014C23Rik	ENSMUSG00000094690.3	protein_coding	chr17_46000000	29.4499	41.2065	-0.4236	25.5478	34.7548	0.9566	0.8381	0.1185	biallelic	Autosomes	.
1600020E01Rik	ENSMUSG00000097048.10	lncRNA	chr6_86550000	182.424	349.231	-0.9184	2.6888	5.0046	0.9557	0.8326	0.123	biallelic	Autosomes	.
1700001G11Rik	ENSMUSG00000085984.10	lncRNA	chr14_66500000	33.8147	42.4787	-0.2907	5.8849	7.1876	0.7318	0.8283	-0.0965	biallelic	Autosomes	.
1700001J03Rik	ENSMUSG00000095040.3	protein_coding	chr5_146100000	5.25976	32.4133	-1.8666	1.5619	9.3579	0.5422	0.4681	0.0741	skewed:CAST	Autosomes	.
1700001L05Rik	ENSMUSG00000075511.12	lncRNA	chr15_83250000	41.1476	1.42383	2.8447	2.5832	0.0869	0.9584	0.9926	-0.0342	mono:B6	Autosomes	.
1700003E16Rik	ENSMUSG00000030030.6	protein_coding	chr6_83100000	39.5938	39.9518	-0.0115	5.1461	5.0486	0.9299	0.869	0.0609	biallelic	Autosomes	.
1700003F12Rik	ENSMUSG00000038523.11	protein_coding	chr2_154350000	10.0416	12.7158	-0.2361	2.9256	3.6019	0.8769	0.8748	0.002	biallelic	Autosomes	.
1700003M07Rik	ENSMUSG00000085389.10	lncRNA	chr4_129850000	397.444	227.067	0.7942	15.323	8.5114	0.8612	0.9949	-0.1337	biallelic	Autosomes	.
1700007L15Rik	ENSMUSG00000097318.5	lncRNA	chr16_33200000	52.0252	59.0854	-0.1684	5.5411	6.1185	0.9135	0.7853	0.1282	biallelic	Autosomes	.
1700008O03Rik	ENSMUSG00000008028.16	protein_coding	chr7_44000000	7.91325	27.2589	-1.3208	0.261	0.8741	0.798	0.9992	-0.2011	skewed:CAST	Autosomes	.
1700010I14Rik	ENSMUSG00000023873.14	protein_coding	chr17_9200000	4.46509	17.3908	-1.2422	0.1607	0.6087	0.8414	0.7155	0.1259	skewed:CAST	Autosomes	.
1700010K24Rik	ENSMUSG00000085102.3	lncRNA	chr3_108150000	30.9527	33.9058	-0.1139	3.2411	3.4518	0.9146	0.8312	0.0834	biallelic	Autosomes	.
1700016J18Rik	ENSMUSG00000111103.4	lncRNA	chr10_41900000	8.9774	10.6523	-0.1633	0.671	0.7741	0.9809	0.7904	0.1905	biallelic	Autosomes	.
1700016L21Rik	ENSMUSG00000101483.4	lncRNA	chr1_80400000	6.14885	7.80462	-0.1998	0.0327	0.0404	0.9711	0.5157	0.4554	biallelic	Autosomes	.
1700016P03Rik	ENSMUSG00000085609.4	lncRNA	chr11_75050000	33.6338	13.759	1.0423	3.9483	1.5704	0.9236	0.8815	0.0421	skewed:B6	Autosomes	.
1700017B05Rik	ENSMUSG00000032300.8	protein_coding	chr9_57150000	325.287	333.037	-0.0335	29.1251	28.9916	0.9953	0.9537	0.0417	biallelic	Autosomes	.
1700017M07Rik	ENSMUSG00000105651.3	lncRNA	chr3_35400000	9.15246	18.5785	-0.7364	0.0513	0.1013	0.8451	0.6862	0.1589	biallelic	Autosomes	.
1700018L02Rik	ENSMUSG00000100075.3	lncRNA	chr19_29000000	11.4086	5.505	0.6434	3.903	1.8311	0.8736	0.9158	-0.0422	biallelic	Autosomes	.
1700019A02Rik	ENSMUSG00000060715.10	protein_coding	chr1_53200000	9.58321	4.67502	0.592	0.2804	0.133	0.5211	0.4008	0.1203	biallelic	Autosomes	.
1700019C18Rik	ENSMUSG00000113770.3	lncRNA	chr13_35550000	7.99388	4.29439	0.4834	0.0217	0.0113	0.8271	0.5699	0.2572	biallelic	Autosomes	.
1700019D03Rik	ENSMUSG00000043629.13	protein_coding	chr1_53000000	21.8199	36.6618	-0.6354	0.1896	0.3097	0.2894	0.5979	-0.3085	biallelic	Autosomes	.
1700020L13Rik	ENSMUSG00000121875.2	lncRNA	chr7_29950000	4.68737	10.0355	-0.6342	0.3929	0.8178	0.8651	0.9058	-0.0407	biallelic	Autosomes	.
1700022N22Rik	ENSMUSG00000097523.5	lncRNA	chr17_26200000	53.9312	33.3877	0.6184	3.279	1.9736	0.9152	0.9329	-0.0176	biallelic	Autosomes	.
1700025G04Rik	ENSMUSG00000032666.17	protein_coding	chr1_151750000	3572.38	2762.96	0.3701	12.7757	9.6069	0.7777	0.9764	-0.1987	biallelic	Autosomes	.
1700026N04Rik	ENSMUSG00000114681.4	lncRNA	chr13_47300000	6.72125	9.32714	-0.2896	0.077	0.1039	0.8848	0.7711	0.1136	biallelic	Autosomes	.
1700028E10Rik	ENSMUSG00000097321.8	lncRNA	chr5_151350000	85.2341	32.9613	1.2491	0.8884	0.334	0.3713	0.5359	-0.1646	skewed:B6	Autosomes	.
1700029K24Rik	ENSMUSG00000120880.2	lncRNA	chr11_70500000	47.5543	42.0153	0.1607	25.3947	21.8142	0.9731	0.9618	0.0113	biallelic	Autosomes	.
1700030C12Rik	ENSMUSG00000086459.5	lncRNA	chr11_23400000	1.41427	9.01523	-1.1276	0.3714	2.302	0.5566	0.6679	-0.1113	skewed:CAST	Autosomes	.
1700030J22Rik	ENSMUSG00000031847.9	protein_coding	chr8_117650000	35.4651	29.6343	0.2245	3.2195	2.6155	0.7559	0.5856	0.1704	biallelic	Autosomes	.
1700031C06Rik	ENSMUSG00000120820.2	lncRNA	chr14_70500000	32.2726	10.5836	1.2581	2.3342	0.7443	0.8436	0.9463	-0.1027	skewed:B6	Autosomes	.
1700034H15Rik	ENSMUSG00000055833.16	lncRNA	chr1_191600000	6.54619	16.5379	-0.8995	0.1884	0.4627	0.7364	0.6788	0.0575	skewed:CAST	Autosomes	.
1700034P13Rik	ENSMUSG00000097893.11	lncRNA	chr1_9800000	18.3383	25.3628	-0.3796	0.3458	0.465	0.8141	0.6175	0.1966	biallelic	Autosomes	.
1700037C18Rik	ENSMUSG00000005983.16	protein_coding	chr16_3700000	28.5077	29.1162	-0.026	1.7939	1.7814	0.8031	0.7095	0.0936	biallelic	Autosomes	.
1700040D17Rik	ENSMUSG00000097515.4	lncRNA	chr3_94300000	38.8522	2.84766	2.4823	1.6122	0.1149	0.8801	0.8874	-0.0073	mono:B6	Autosomes	.
1700041G16Rik	ENSMUSG00000054822.7	lncRNA	chr8_23250000	41.9306	63.0837	-0.5368	8.8763	12.9837	0.7005	0.8787	-0.1782	biallelic	Autosomes	.
1700052K11Rik	ENSMUSG00000099681.3	lncRNA	chr11_105050000	184.774	195.417	-0.0787	42.3755	43.5727	0.803	0.7562	0.0467	biallelic	Autosomes	.
1700055D18Rik	ENSMUSG00000070997.6	lncRNA	chr4_45000000	27.1545	21.2358	0.2935	3.8145	2.9003	0.9349	0.8703	0.0645	biallelic	Autosomes	.
1700056E22Rik	ENSMUSG00000044854.8	protein_coding	chr1_183750000	31.0806	22.0658	0.4148	20.7893	14.3499	0.8661	0.5656	0.3004	biallelic	Autosomes	.
1700056N10Rik	ENSMUSG00000084792.3	lncRNA	chr16_16850000	14.5539	16.0886	-0.109	7.5908	8.1584	0.9289	0.7325	0.1965	biallelic	Autosomes	.
1700064N11Rik	ENSMUSG00000120053.2	lncRNA	chr5_121800000	27.599	6.14466	1.5485	8.4249	1.8237	0.8575	0.9692	-0.1118	skewed:B6	Autosomes	.
1700065D16Rik	ENSMUSG00000096655.4	lncRNA	chr9_95700000	14.2844	3.89086	1.117	4.1746	1.1055	0.6012	0.5705	0.0307	skewed:B6	Autosomes	.
1700066M21Rik	ENSMUSG00000038323.4	protein_coding	chr1_57400000	809.93	1080.62	-0.4138	88.2434	114.469	0.7319	0.6009	0.131	biallelic	Autosomes	.
1700080G18Rik	ENSMUSG00000120456.2	lncRNA	chr6_30000000	18.5882	8.6346	0.7908	26.9672	12.1792	0.8513	0.8131	0.0382	biallelic	Autosomes	.
1700081N11Rik	ENSMUSG00000113209.4	lncRNA	chr12_54900000	10.9641	6.52529	0.47	0.2571	0.1488	0.8498	0.9714	-0.1216	biallelic	Autosomes	.
1700084C06Rik	ENSMUSG00000086016.3	lncRNA	chr9_21000000	29.1746	25.7205	0.1537	0.6764	0.5798	0.9762	0.9476	0.0286	biallelic	Autosomes	.
1700085D22Rik	ENSMUSG00000120183.2	lncRNA	chr8_73300000	51.2777	72.684	-0.4651	4.7369	6.5281	0.952	0.8071	0.1449	biallelic	Autosomes	.
1700086O06Rik	ENSMUSG00000097080.11	lncRNA	chr18_38350000	198.539	82.4763	1.2183	13.7652	5.5596	0.8568	0.9533	-0.0965	skewed:B6	Autosomes	.
1700086P04Rik	ENSMUSG00000085085.5	lncRNA	chr4_128950000	47.5405	62.4969	-0.3614	4.598	5.8769	0.8281	0.9211	-0.093	biallelic	Autosomes	.
1700087I21Rik	ENSMUSG00000119948.2	lncRNA	chr14_103550000	43.3783	40.195	0.0982	0.3568	0.3214	0.8275	0.5962	0.2313	biallelic	Autosomes	.
1700088E04Rik	ENSMUSG00000033029.13	protein_coding	chr15_79000000	211.97	157.255	0.4192	15.1383	10.9191	0.9245	0.8663	0.0582	biallelic	Autosomes	.
1700093J21Rik	ENSMUSG00000117289.3	lncRNA	chr16_95850000	50.6857	35.779	0.4495	6.7151	4.6086	0.9179	0.922	-0.0041	biallelic	Autosomes	.
1700095A13Rik	ENSMUSG00000100430.4	lncRNA	chr18_83100000	17.5299	2.42122	1.6021	0.4509	0.0605	0.7068	0.5401	0.1667	skewed:B6	Autosomes	.
1700095J03Rik	ENSMUSG00000085407.4	lncRNA	chr7_109000000	61.2445	6.28917	2.5529	8.2857	0.8272	0.9021	0.7134	0.1887	mono:B6	Autosomes	.
1700096K18Rik	ENSMUSG00000101856.3	lncRNA	chr5_25700000	97.0008	102.997	-0.0824	52.359	54.0528	0.7576	0.7783	-0.0207	biallelic	Autosomes	.
1700101I11Rik	ENSMUSG00000097675.5	lncRNA	chr6_129500000	22.5143	19.8578	0.1465	1.0544	0.9042	0.5889	0.5284	0.0605	biallelic	Autosomes	.
1700102H20Rik	ENSMUSG00000116852.4	lncRNA	chr17_3600000	33.8757	9.56327	1.4165	11.1195	3.052	0.7333	0.4726	0.2607	skewed:B6	Autosomes	.
1700102P08Rik	ENSMUSG00000032611.10	protein_coding	chr9_108250000	40.6108	58.3399	-0.4737	1.9044	2.6599	0.907	0.9067	0.0003	biallelic	Autosomes	.
1700105P06Rik	ENSMUSG00000099923.5	lncRNA	chr19_7350000	95.8422	62.4669	0.5798	3.2676	2.0706	0.9605	0.8776	0.0829	biallelic	Autosomes	.
1700109G14Rik	ENSMUSG00000101505.3	lncRNA	chr14_61550000	6.72125	14.855	-0.7604	0.2192	0.471	0.9379	0.8724	0.0655	biallelic	Autosomes	.
1700109H08Rik	ENSMUSG00000008307.12	protein_coding	chr5_3600000	121.561	43.6136	1.3804	8.0801	2.8186	0.7211	0.7947	-0.0736	skewed:B6	Autosomes	.
1700110C19Rik	ENSMUSG00000099384.9	lncRNA	chr17_10550000	82.2363	65.2142	0.3132	6.1306	4.7267	0.6489	0.8112	-0.1624	biallelic	Autosomes	.
1700111E14Rik	ENSMUSG00000029837.4	lncRNA	chr6_36950000	1.01694	50.8701	-3.215	0.0177	0.8627	0.9358	0.6974	0.2385	mono:CAST	Autosomes	.
1700112D23Rik	ENSMUSG00000091329.5	lncRNA	chr3_28700000	22.231	7.54559	1.1181	0.1667	0.055	0.5711	0.7313	-0.1602	skewed:B6	Autosomes	.
1700112J16Rik	ENSMUSG00000097527.5	lncRNA	chr7_66850000	5.03749	11.3906	-0.7075	0.229	0.5033	0.7904	0.8568	-0.0664	biallelic	Autosomes	.
1700113A16Rik	ENSMUSG00000096935.8	lncRNA	chr3_88050000	97.3095	6.5482	3.1472	6.6727	0.4366	0.9789	0.9951	-0.0162	mono:B6	Autosomes	.
1700120C14Rik	ENSMUSG00000100599.5	lncRNA	chr15_99150000	24.0564	30.0608	-0.271	0.5963	0.7244	0.9859	0.8876	0.0983	biallelic	Autosomes	.
1700123M08Rik	ENSMUSG00000085614.4	lncRNA	chr4_11950000	125.54	99.698	0.3183	2.1252	1.6409	0.6065	0.7871	-0.1806	biallelic	Autosomes	.
1700123O20Rik	ENSMUSG00000040822.8	protein_coding	chr14_54900000	718.213	841.633	-0.2273	134.937	153.737	0.9925	0.9774	0.0151	biallelic	Autosomes	.
1700124L16Rik	ENSMUSG00000099354.8	lncRNA	chr6_83700000	10.3917	3.70054	0.823	5.0025	1.732	0.8747	0.8209	0.0539	skewed:B6	Autosomes	.
1810010H24Rik	ENSMUSG00000078607.7	protein_coding	chr11_106900000	244.658	267.956	-0.1287	43.6783	46.5104	0.8969	0.8864	0.0105	biallelic	Autosomes	.
1810013D15Rik	ENSMUSG00000028177.16	lncRNA	chr3_157600000	11.0585	16.3247	-0.4092	0.7151	1.0263	0.5018	0.3323	0.1695	biallelic	Autosomes	.
1810019N24Rik	ENSMUSG00000097115.5	lncRNA	chr7_12650000	11.7587	2.04059	1.2511	0.6339	0.1069	0.6429	0.6863	-0.0433	skewed:B6	Autosomes	.
1810024B03Rik	ENSMUSG00000044145.3	protein_coding	chr2_127050000	145.151	76.4374	0.8826	5.6283	2.8817	0.9454	0.9003	0.0451	biallelic	Autosomes	.
1810028F09Rik	ENSMUSG00000114985.2	lncRNA	chr14_51350000	9.2941	1.23351	1.1973	6.3363	0.8176	0.6936	0.4979	0.1957	skewed:B6	Autosomes	.
1810030O07Rik	ENSMUSG00000044148.7	protein_coding	chrX_12500000	1477.59	473.117	1.6327	66.8568	20.8132	0.9569	0.8596	0.0974	skewed:B6	X	ESCAPEE
1810037I17Rik	ENSMUSG00000054091.10	protein_coding	chr3_122700000	1955.61	1843.32	0.0851	839.256	769.114	0.7504	0.6615	0.0889	biallelic	Autosomes	.
1810041H14Rik	ENSMUSG00000102112.4	lncRNA	chr14_122100000	18.7495	2.2309	1.7156	5.2057	0.6022	0.7896	0.5533	0.2363	skewed:B6	Autosomes	.
1810044D09Rik	ENSMUSG00000100680.4	lncRNA	chr6_91350000	8.18273	42.662	-1.8542	0.2416	1.2244	0.9102	0.7958	0.1145	skewed:CAST	Autosomes	.
1810055G02Rik	ENSMUSG00000035372.3	protein_coding	chr19_3750000	466.789	581.331	-0.3136	41.3893	50.1154	0.9989	0.9914	0.0075	biallelic	Autosomes	.
1810059C17Rik	ENSMUSG00000086340.3	lncRNA	chr2_18050000	43.0144	42.0223	0.0301	2.3861	2.2663	0.9746	0.8052	0.1694	biallelic	Autosomes	.
1810062G17Rik	ENSMUSG00000027713.7	protein_coding	chr3_36500000	19.2746	8.11653	0.8881	2.5757	1.0545	0.9412	0.8767	0.0646	skewed:B6	Autosomes	.
1810062O18Rik	ENSMUSG00000084925.10	lncRNA	chr14_20550000	39.6745	33.3578	0.2199	1.3707	1.1205	0.9245	0.9609	-0.0363	biallelic	Autosomes	.
2010001A14Rik	ENSMUSG00000087165.10	lncRNA	chr11_57650000	448.976	622.571	-0.4672	15.1371	20.4074	0.9911	0.892	0.0991	biallelic	Autosomes	.
2010004M13Rik	ENSMUSG00000120250.2	lncRNA	chr7_15750000	62.2084	82.4534	-0.3799	69.314	89.3222	0.955	0.9923	-0.0373	biallelic	Autosomes	.
2010007H06Rik	ENSMUSG00000044694.4	lncRNA	chr9_51150000	3.40094	9.13683	-0.7508	0.2756	0.7198	0.5488	0.7612	-0.2124	skewed:CAST	Autosomes	.
2010109A12Rik	ENSMUSG00000029384.6	protein_coding	chr5_93350000	13.0786	9.51746	0.3165	1.5982	1.1308	0.8199	0.5247	0.2952	biallelic	Autosomes	.
2010110K18Rik	ENSMUSG00000097755.5	lncRNA	chr18_34850000	43.2839	93.2889	-1.0255	4.7933	10.0442	0.911	0.7824	0.1285	biallelic	Autosomes	.
2010203P06Rik	ENSMUSG00000114604.3	lncRNA	chr13_56750000	13.0786	47.7018	-1.5436	0.5154	1.8278	0.8817	0.7422	0.1395	skewed:CAST	Autosomes	.
2010308F09Rik	ENSMUSG00000100714.8	lncRNA	chrX_13100000	63.542	40.3624	0.5955	1.1504	0.7105	0.9431	0.7351	0.208	biallelic	X	ESCAPEE
2010320M18Rik	ENSMUSG00000100691.4	lncRNA	chr8_71200000	460.446	216.637	1.0704	332.017	151.878	0.9817	0.9848	-0.003	biallelic	Autosomes	.
2210016L21Rik	ENSMUSG00000029559.16	protein_coding	chr5_115050000	860.981	857.91	0.0051	95.9952	92.9987	0.9787	0.7447	0.234	biallelic	Autosomes	.
2210406O10Rik	ENSMUSG00000039563.9	lncRNA	chr5_36600000	16.9851	15.5176	0.0997	0.8053	0.7153	0.941	0.9985	-0.0575	biallelic	Autosomes	.
2210408F21Rik	ENSMUSG00000087380.10	lncRNA	chr6_31200000	158.121	137.791	0.192	0.8154	0.6908	0.7652	0.9822	-0.217	biallelic	Autosomes	.
2210408I21Rik	ENSMUSG00000071252.7	protein_coding	chr13_77500000	79.7993	58.3012	0.4218	0.1419	0.1008	0.0641	0.8035	-0.7394	biallelic	Autosomes	.
2300009A05Rik	ENSMUSG00000032403.9	protein_coding	chr9_63300000	88.1905	105.622	-0.2474	15.6231	18.192	0.8826	0.8393	0.0433	biallelic	Autosomes	.
2310009B15Rik	ENSMUSG00000079283.3	protein_coding	chr1_138750000	175.063	187.538	-0.0966	30.5669	31.8365	0.4481	0.6152	-0.167	biallelic	Autosomes	.
2310010J17Rik	ENSMUSG00000097162.5	lncRNA	chr7_89750000	112.833	141.394	-0.3131	13.3192	16.2276	0.7132	0.5945	0.1187	biallelic	Autosomes	.
2310011J03Rik	ENSMUSG00000020133.9	protein_coding	chr10_80150000	674.693	602.306	0.1625	251.244	218.065	0.9863	0.9901	-0.0038	biallelic	Autosomes	.
2310014F06Rik	ENSMUSG00000085945.5	lncRNA	chr7_112200000	181.554	209.8	-0.2034	1.9762	2.2203	0.8076	0.8868	-0.0792	biallelic	Autosomes	.
2310015A10Rik	ENSMUSG00000097729.5	lncRNA	chr12_80150000	400.844	257.221	0.6301	13.2003	8.2356	0.9523	0.9338	0.0185	biallelic	Autosomes	.
2310022A10Rik	ENSMUSG00000049643.16	protein_coding	chr7_27250000	508.124	507.198	0.0026	14.9651	14.5233	0.951	0.929	0.0219	biallelic	Autosomes	.
2310022B05Rik	ENSMUSG00000031983.8	protein_coding	chr8_125350000	3014.73	3655.92	-0.2778	92.8176	109.436	0.9336	0.8613	0.0723	biallelic	Autosomes	.
2310033P09Rik	ENSMUSG00000020441.7	protein_coding	chr11_59050000	168.934	210.646	-0.3101	59.4206	72.0362	0.7479	0.8875	-0.1396	biallelic	Autosomes	.
2310034G01Rik	ENSMUSG00000099655.3	protein_coding	chr19_46300000	54.3424	4.50761	2.6419	21.9892	1.7734	0.9475	0.9476	-0.0001	mono:B6	Autosomes	.
2310039H08Rik	ENSMUSG00000062619.7	protein_coding	chr17_47050000	262.721	272.297	-0.0507	293.498	295.755	0.8883	0.9669	-0.0786	biallelic	Autosomes	.
2310040G24Rik	ENSMUSG00000101655.4	lncRNA	chr6_86450000	69.6161	56.428	0.2806	4.2277	3.3318	0.9576	0.8156	0.1419	biallelic	Autosomes	.
2310047K21Rik	ENSMUSG00000120507.2	lncRNA	chr2_104650000	485.93	456.385	0.0895	42.4141	38.73	0.6334	0.8458	-0.2124	biallelic	Autosomes	.
2310058D17Rik	ENSMUSG00000085379.4	lncRNA	chr11_58850000	199.826	361.876	-0.8409	13.1001	23.0655	0.7383	0.7597	-0.0213	biallelic	Autosomes	.
2310068J16Rik	ENSMUSG00000100084.4	lncRNA	chr15_99850000	7.38807	15.0912	-0.6976	4.4768	8.8908	0.9248	0.9412	-0.0164	biallelic	Autosomes	.
2310081O03Rik	ENSMUSG00000085020.3	lncRNA	chr4_56250000	57.0351	109.14	-0.8796	0.3478	0.6471	0.6242	0.7953	-0.1711	biallelic	Autosomes	.
2410004B18Rik	ENSMUSG00000036873.14	protein_coding	chr3_145650000	234.96	189.759	0.3011	29.3106	23.015	0.6019	0.9076	-0.3057	biallelic	Autosomes	.
2410006H16Rik	ENSMUSG00000086841.4	lncRNA	chr11_62450000	2899.53	2251.29	0.3644	1126.1	850.082	0.9938	0.9852	0.0087	biallelic	Autosomes	.
2410022M11Rik	ENSMUSG00000100017.4	lncRNA	chr14_57050000	77.5511	31.7894	1.166	33.1808	13.2239	0.7154	0.4179	0.2974	skewed:B6	Autosomes	.
2500002B13Rik	ENSMUSG00000096917.5	lncRNA	chr8_57900000	117.107	57.2422	0.9722	4.2403	2.0152	0.8491	0.7322	0.1168	biallelic	Autosomes	.
2500004C02Rik	ENSMUSG00000073236.7	lncRNA	chr2_153150000	126.443	198.598	-0.6313	21.6376	33.0421	0.9611	0.7744	0.1867	biallelic	Autosomes	.
2510009E07Rik	ENSMUSG00000043391.11	protein_coding	chr16_21500000	2744.67	2760.61	-0.0083	51.1483	50.0178	0.9844	0.7467	0.2377	biallelic	Autosomes	.
2510017J16Rik	ENSMUSG00000104891.2	lncRNA	chr5_3600000	10.5333	9.03813	0.146	7.0958	5.9196	0.7211	0.7947	-0.0736	biallelic	Autosomes	.
2510039O18Rik	ENSMUSG00000044496.7	protein_coding	chr4_148000000	901.266	953.354	-0.0806	119.366	122.761	0.713	0.6568	0.0562	biallelic	Autosomes	.
2510046G10Rik	ENSMUSG00000066175.5	lncRNA	chr7_126200000	24.8177	20.4288	0.2297	19.9045	15.9298	0.8959	0.9619	-0.066	biallelic	Autosomes	.
2610008E11Rik	ENSMUSG00000060301.7	protein_coding	chr10_78900000	1424.79	813.606	0.8046	36.456	20.24	0.5764	0.5364	0.04	biallelic	Autosomes	.
2610020C07Rik	ENSMUSG00000097537.5	lncRNA	chr16_11050000	75.4482	73.8559	0.0288	1.0407	0.9905	0.9892	0.6664	0.3228	biallelic	Autosomes	.
2610021A01Rik	ENSMUSG00000091474.3	protein_coding	chr7_41250000	522.295	417.957	0.3181	15.1531	11.7895	0.7162	0.3593	0.357	biallelic	Autosomes	.
2610027K06Rik	ENSMUSG00000087013.10	lncRNA	chr11_85700000	7.73819	17.4895	-0.8201	0.161	0.3537	0.8386	0.9653	-0.1267	biallelic	Autosomes	.
2610029K11Rik	ENSMUSG00000120681.2	lncRNA	chr17_34800000	53.5615	55.0658	-0.0366	23.1614	23.1512	0.9898	0.8869	0.1029	biallelic	Autosomes	.
2610035D17Rik	ENSMUSG00000087259.10	lncRNA	chr11_113050000	1084.64	842.596	0.3624	5.835	4.4071	0.8856	0.6694	0.2162	biallelic	Autosomes	.
2610035F20Rik	ENSMUSG00000085555.12	lncRNA	chr14_122700000	21.8947	23.7716	-0.0973	2.0045	2.1159	0.5236	0.8044	-0.2807	biallelic	Autosomes	.
2610037D02Rik	ENSMUSG00000097536.4	lncRNA	chr15_96050000	170.216	480.054	-1.469	0.9566	2.6231	0.6747	0.8158	-0.1411	skewed:CAST	Autosomes	.
2610203C22Rik	ENSMUSG00000079671.11	lncRNA	chr1_9700000	143.77	217.869	-0.5831	0.8834	1.3016	0.6898	0.5487	0.1411	biallelic	Autosomes	.
2610206C17Rik	ENSMUSG00000085236.5	lncRNA	chr7_84350000	6.05443	16.3247	-0.9479	0.0474	0.1242	0.5286	0.3976	0.131	skewed:CAST	Autosomes	.
2610306M01Rik	ENSMUSG00000100164.3	lncRNA	chr6_86800000	217.08	247.566	-0.1856	19.488	21.6081	0.928	0.9607	-0.0328	biallelic	Autosomes	.
2610307P16Rik	ENSMUSG00000085936.10	lncRNA	chr13_28600000	513.162	607.943	-0.2424	0.9587	1.1043	0.735	0.9718	-0.2369	biallelic	Autosomes	.
2610316D01Rik	ENSMUSG00000097040.9	lncRNA	chr3_45300000	322.934	357.665	-0.1452	2.53	2.7244	0.5806	0.4493	0.1313	biallelic	Autosomes	.
2610318N02Rik	ENSMUSG00000049916.13	protein_coding	chr16_16900000	22.056	26.5576	-0.222	1.5932	1.8652	0.9222	0.8758	0.0464	biallelic	Autosomes	.
2610507I01Rik	ENSMUSG00000085882.4	lncRNA	chr11_59050000	1015.19	68.7861	3.7893	154.616	10.1856	0.7479	0.8875	-0.1396	mono:B6	Autosomes	.
2700033N17Rik	ENSMUSG00000086328.4	lncRNA	chr2_115850000	90.7771	127.789	-0.4714	21.8748	29.9391	0.7722	0.6243	0.1479	biallelic	Autosomes	.
2700038G22Rik	ENSMUSG00000097180.8	lncRNA	chr5_24050000	146.848	101.525	0.5114	11.2624	7.5703	0.9251	0.8924	0.0328	biallelic	Autosomes	.
2700054A10Rik	ENSMUSG00000117042.3	lncRNA	chr17_13850000	43.9841	13.8119	1.3807	0.1736	0.053	0.7255	0.656	0.0695	skewed:B6	Autosomes	.
2700062C07Rik	ENSMUSG00000024273.9	protein_coding	chr18_24600000	218.445	232.944	-0.0907	26.7288	27.712	0.7621	0.7302	0.0318	biallelic	Autosomes	.
2700068H02Rik	ENSMUSG00000086172.2	lncRNA	chr4_106400000	3.27309	13.1722	-1.1352	0.862	3.3729	0.8138	0.9652	-0.1514	skewed:CAST	Autosomes	.
2700097O09Rik	ENSMUSG00000062198.6	protein_coding	chr12_55050000	301.956	308.927	-0.0324	7.4518	7.4123	0.7341	0.9061	-0.172	biallelic	Autosomes	.
2700099C18Rik	ENSMUSG00000121491.2	lncRNA	chr17_95050000	36.5016	231.018	-2.5077	0.6922	4.2591	0.4013	0.5043	-0.103	skewed:CAST	Autosomes	.
2810001A02Rik	ENSMUSG00000120224.2	lncRNA	chr15_86050000	256.135	266.503	-0.0562	19.868	20.0986	0.9795	0.8147	0.1648	biallelic	Autosomes	.
2810001G20Rik	ENSMUSG00000087497.10	lncRNA	chr11_64000000	428.677	407.819	0.0711	4.3872	4.058	0.4592	0.5588	-0.0996	biallelic	Autosomes	.
2810002D19Rik	ENSMUSG00000045464.8	lncRNA	chr2_94250000	438.189	222.239	0.9637	13.1292	6.474	0.8402	0.592	0.2483	biallelic	Autosomes	.
2810004N23Rik	ENSMUSG00000031984.9	protein_coding	chr8_125550000	1840.91	2170.64	-0.2371	59.7919	68.5452	0.8254	0.7839	0.0415	biallelic	Autosomes	.
2810013P06Rik	ENSMUSG00000099881.4	lncRNA	chr8_123750000	378.573	271.216	0.4737	144.454	100.618	0.8775	0.9471	-0.0696	biallelic	Autosomes	.
2810029C07Rik	ENSMUSG00000096995.5	lncRNA	chr12_111500000	370.304	123.152	1.5502	21.1342	6.8336	0.9871	0.7879	0.1993	skewed:B6	Autosomes	.
2810030D12Rik	ENSMUSG00000099338.4	lncRNA	chr8_13200000	10.2638	8.56588	0.1701	0.404	0.3278	0.9052	0.9309	-0.0257	biallelic	Autosomes	.
2810032G03Rik	ENSMUSG00000037735.9	lncRNA	chr12_5450000	11.8866	5.24597	0.7208	0.2435	0.1045	0.4624	0.6125	-0.1501	biallelic	Autosomes	.
2810402E24Rik	ENSMUSG00000099966.4	lncRNA	chr14_20650000	269.658	144.799	0.8746	72.2959	37.7436	0.9645	0.7811	0.1834	biallelic	Autosomes	.
2810403D21Rik	ENSMUSG00000086629.11	lncRNA	chrX_108000000	431.672	0	6.4485	2.5358	0	0.2197	0.4534	-0.2337	mono:B6	X	.
2810405F17Rik	ENSMUSG00000101493.4	lncRNA	chr4_137100000	0	18.6243	-2.2403	0	10.4793	0.828	0.7999	0.0281	mono:CAST	Autosomes	.
2810408A11Rik	ENSMUSG00000018570.18	protein_coding	chr11_69750000	246.235	394.635	-0.6696	57.5893	89.7359	0.9453	0.9673	-0.022	biallelic	Autosomes	.
2810408I11Rik	ENSMUSG00000087213.5	lncRNA	chr1_64700000	100.405	93.0211	0.1048	7.7109	6.9456	0.6607	0.684	-0.0233	biallelic	Autosomes	.
2810414N06Rik	ENSMUSG00000100594.4	lncRNA	chr1_151600000	48.5102	80.1467	-0.6701	1.8781	3.0168	0.7178	0.7438	-0.026	biallelic	Autosomes	.
2810429I04Rik	ENSMUSG00000097709.11	lncRNA	chr13_3500000	65.5738	6.6927	2.5935	2.2878	0.227	0.3241	0.2773	0.0467	mono:B6	Autosomes	.
2810433D01Rik	ENSMUSG00000086283.9	lncRNA	chr11_102500000	11.3614	6.90593	0.4586	1.2325	0.7284	0.8554	0.9574	-0.102	biallelic	Autosomes	.
2810449D17Rik	ENSMUSG00000120362.2	lncRNA	chr19_33350000	9.536	155.511	-3.465	0.2692	4.2683	0.386	0.4491	-0.063	mono:CAST	Autosomes	.
2810455O05Rik	ENSMUSG00000085030.2	lncRNA	chr8_124550000	7.91325	10.2487	-0.2398	3.0141	3.7953	0.9392	0.911	0.0281	biallelic	Autosomes	.
2810459M11Rik	ENSMUSG00000026227.12	protein_coding	chr1_85950000	4792.23	10257.9	-1.0972	424.697	883.856	0.9509	0.7508	0.2001	biallelic	Autosomes	.
2900005J15Rik	ENSMUSG00000043833.9	lncRNA	chr5_25300000	51.3053	42.3043	0.2513	4.3474	3.4852	0.8536	0.7938	0.0598	biallelic	Autosomes	.
2900009J06Rik	ENSMUSG00000102014.3	lncRNA	chr1_127650000	32.5893	25.9567	0.2801	0.7062	0.5469	0.4823	0.5201	-0.0379	biallelic	Autosomes	.
2900026A02Rik	ENSMUSG00000051339.11	protein_coding	chr5_113250000	462.508	407.037	0.1822	2.9145	2.4938	0.8404	0.9939	-0.1535	biallelic	Autosomes	.
2900045O20Rik	ENSMUSG00000111938.3	lncRNA	chr12_4550000	8.62728	13.9493	-0.4756	0.5174	0.8133	0.6856	0.9038	-0.2182	biallelic	Autosomes	.
2900052L18Rik	ENSMUSG00000043993.9	lncRNA	chr11_120100000	246.107	314.252	-0.3464	12.63	15.6796	0.9653	0.9941	-0.0288	biallelic	Autosomes	.
2900052N01Rik	ENSMUSG00000099696.9	lncRNA	chr9_46800000	7.38807	7.80462	-0.0477	0.4252	0.4367	0.5085	0.5436	-0.0351	biallelic	Autosomes	.
2900060N12Rik	ENSMUSG00000113621.4	lncRNA	chr12_24800000	63.4614	117.251	-0.8365	1.5211	2.7324	0.9249	0.7858	0.1391	biallelic	Autosomes	.
2900076A07Rik	ENSMUSG00000097277.10	lncRNA	chr7_81150000	390.766	659.985	-0.7487	10.9287	17.9459	0.9264	0.838	0.0884	biallelic	Autosomes	.
2900089D17Rik	ENSMUSG00000087484.3	lncRNA	chr5_144150000	121.104	133.493	-0.1352	7.1024	7.6117	0.6296	0.6714	-0.0418	biallelic	Autosomes	.
2900093K20Rik	ENSMUSG00000099632.4	lncRNA	chr2_163250000	74.0754	49.7283	0.5309	84.0791	54.8778	0.872	0.9496	-0.0776	biallelic	Autosomes	.
3010001F23Rik	ENSMUSG00000084885.9	lncRNA	chrX_151200000	45.9374	4.86534	2.3683	0.7786	0.0802	0.7166	0.1191	0.5975	mono:B6	X	.
3010003L21Rik	ENSMUSG00000085355.5	lncRNA	chr6_148800000	22.9117	29.8704	-0.3211	6.4413	8.1646	0.5799	0.4842	0.0957	biallelic	Autosomes	.
3100003L05Rik	ENSMUSG00000086254.3	lncRNA	chr7_124300000	2.03388	640.406	-6.5197	0.0207	6.3263	0.2086	0.5369	-0.3283	mono:CAST	Autosomes	.
3110009E18Rik	ENSMUSG00000026388.16	protein_coding	chr1_120050000	37.613	162.554	-1.9753	0.4773	2.0053	0.8467	0.6105	0.2362	skewed:CAST	Autosomes	.
3110040N11Rik	ENSMUSG00000025102.15	protein_coding	chr7_81400000	524.623	458.649	0.1919	61.1306	51.9602	0.7541	0.914	-0.1599	biallelic	Autosomes	.
3110045C21Rik	ENSMUSG00000097503.5	lncRNA	chr1_169750000	125.79	120.493	0.0596	29.6891	27.6499	0.6348	0.6743	-0.0394	biallelic	Autosomes	.
3110053B16Rik	ENSMUSG00000121318.2	lncRNA	chr12_20900000	464.601	119.008	1.921	8.2458	2.0536	0.5883	0.6222	-0.0339	skewed:B6	Autosomes	.
3110056K07Rik	ENSMUSG00000085622.11	lncRNA	chr12_71000000	184.739	158.373	0.2158	4.8674	4.0569	0.9156	0.8897	0.026	biallelic	Autosomes	.
3110082I17Rik	ENSMUSG00000053553.12	protein_coding	chr5_139300000	417.391	746.504	-0.8312	3.5207	6.1221	0.9476	0.7691	0.1785	biallelic	Autosomes	.
3110082J24Rik	ENSMUSG00000086815.7	lncRNA	chr5_30300000	1015.73	1087.33	-0.0978	78.983	82.2047	0.9659	0.9917	-0.0258	biallelic	Autosomes	.
3110083C13Rik	ENSMUSG00000097303.5	lncRNA	chr14_58200000	20.386	20.3072	0.0045	0.5269	0.5103	0.819	0.6969	0.1221	biallelic	Autosomes	.
3300002I08Rik	ENSMUSG00000063364.11	protein_coding	chr2_150200000	827.621	566.296	0.5434	13.5752	9.031	0.4317	0.2953	0.1364	biallelic	Autosomes	.
3300002P09Rik	ENSMUSG00000120873.2	lncRNA	chr10_80200000	47.3516	37.187	0.3114	21.7836	16.6327	0.9999	0.93	0.0699	biallelic	Autosomes	.
3300002P13Rik	ENSMUSG00000107585.3	lncRNA	chr7_3450000	6.10164	8.54298	-0.2868	0.556	0.7568	0.6656	0.5928	0.0728	biallelic	Autosomes	.
3830408C21Rik	ENSMUSG00000071181.4	lncRNA	chr13_107150000	221.982	88.7426	1.2758	1.4848	0.5771	0.4854	0.7055	-0.2201	skewed:B6	Autosomes	.
3830432H09Rik	ENSMUSG00000101731.2	lncRNA	chr1_119450000	16.4933	115.263	-2.4842	2.0975	14.2516	0.6642	0.6039	0.0603	skewed:CAST	Autosomes	.
4631405J19Rik	ENSMUSG00000075027.13	lncRNA	chr2_92850000	8.74133	10.0884	-0.1349	0.443	0.4971	0.9479	0.9771	-0.0291	biallelic	Autosomes	.
4632404H12Rik	ENSMUSG00000042579.5	lncRNA	chr3_89650000	124.275	91.8951	0.4159	17.962	12.9135	0.9784	0.9997	-0.0213	biallelic	Autosomes	.
4632427E13Rik	ENSMUSG00000074024.8	lncRNA	chr7_92350000	137.403	122.231	0.1625	13.1636	11.3851	0.7959	0.6357	0.1602	biallelic	Autosomes	.
4731419I09Rik	ENSMUSG00000097004.2	lncRNA	chr3_89200000	11.503	10.7968	0.0631	0.9798	0.8941	0.8996	0.9812	-0.0816	biallelic	Autosomes	.
4732419C18Rik	ENSMUSG00000097203.5	lncRNA	chr8_124450000	36.2263	0.403536	2.9316	2.4682	0.0267	0.9455	0.9287	0.0168	mono:B6	Autosomes	.
4732440D04Rik	ENSMUSG00000090031.5	lncRNA	chr1_6200000	69.1577	235.057	-1.6947	1.1491	3.7974	0.2926	0.3621	-0.0695	skewed:CAST	Autosomes	.
4732471J01Rik	ENSMUSG00000053714.11	lncRNA	chr7_25250000	145.981	87.213	0.7113	0.6258	0.3635	0.7248	0.9252	-0.2004	biallelic	Autosomes	.
4732491K20Rik	ENSMUSG00000097350.5	lncRNA	chr17_12550000	101.68	52.7204	0.8861	4.745	2.392	0.8632	0.9413	-0.0781	biallelic	Autosomes	.
4732496C06Rik	ENSMUSG00000108456.2	lncRNA	chr7_116100000	31.3973	44.7097	-0.4497	10.6813	14.788	0.6183	0.4684	0.1499	biallelic	Autosomes	.
4833413G10Rik	ENSMUSG00000104950.2	lncRNA	chr5_3650000	71.8664	60.4105	0.2328	31.4125	25.6725	0.6798	0.7213	-0.0414	biallelic	Autosomes	.
4833417C18Rik	ENSMUSG00000086015.4	lncRNA	chr11_95750000	48.1325	30.9207	0.5648	3.9771	2.484	0.9871	0.862	0.1251	biallelic	Autosomes	.
4833418N02Rik	ENSMUSG00000085287.11	lncRNA	chr17_87550000	91.7665	42.8294	1.0166	9.5222	4.3209	0.8122	0.8695	-0.0574	biallelic	Autosomes	.
4833438C02Rik	ENSMUSG00000118087.4	lncRNA	chr19_46250000	261.462	184.574	0.4912	71.6577	49.1818	0.982	0.9511	0.0308	biallelic	Autosomes	.
4833439L19Rik	ENSMUSG00000025871.19	protein_coding	chr13_54650000	5587.21	3626.47	0.6229	334.105	210.839	0.9942	0.9504	0.0437	biallelic	Autosomes	.
4833445I07Rik	ENSMUSG00000103103.4	lncRNA	chr9_108400000	18.6885	22.1645	-0.1975	7.1279	8.2191	0.8915	0.893	-0.0016	biallelic	Autosomes	.
4921504A21Rik	ENSMUSG00000097626.8	lncRNA	chr5_19350000	73.8647	53.3372	0.435	0.9058	0.6359	0.2344	0.1485	0.0859	biallelic	Autosomes	.
4921511I17Rik	ENSMUSG00000114136.3	lncRNA	chr12_12350000	12.7895	13.3554	-0.0452	0.2512	0.255	0.7818	0.5643	0.2175	biallelic	Autosomes	.
4921515G04Rik	ENSMUSG00000115829.3	lncRNA	chr15_35350000	10.7418	20.6191	-0.7026	0.4171	0.7783	0.7484	0.5193	0.2292	biallelic	Autosomes	.
4921524J17Rik	ENSMUSG00000036934.10	protein_coding	chr8_86150000	244.919	240.239	0.0273	8.6491	8.2484	0.9111	0.7804	0.1307	biallelic	Autosomes	.
4921531C22Rik	ENSMUSG00000085704.4	lncRNA	chr2_179600000	103.897	112.294	-0.1072	20.7392	21.7933	0.7273	0.5497	0.1776	biallelic	Autosomes	.
4921536K21Rik	ENSMUSG00000020434.5	protein_coding	chr11_3800000	57.999	55.2861	0.0635	5.4726	5.0719	0.887	0.7459	0.1411	biallelic	Autosomes	.
4922502N22Rik	ENSMUSG00000108128.3	lncRNA	chr6_139300000	15.8875	1.85027	1.6084	0.2275	0.0258	0.1685	0.2067	-0.0382	skewed:B6	Autosomes	.
4930401O10Rik	ENSMUSG00000085528.3	lncRNA	chr11_71850000	24.1509	46.4771	-0.8204	0.0927	0.1734	0.9647	0.6086	0.3561	biallelic	Autosomes	.
4930405A21Rik	ENSMUSG00000086638.9	lncRNA	chr2_156550000	45.418	47.2454	-0.0514	1.5672	1.5851	0.8168	0.9002	-0.0834	biallelic	Autosomes	.
4930412C18Rik	ENSMUSG00000085558.10	lncRNA	chr4_9750000	15.6376	2.01768	1.5562	0.2215	0.0278	0.4771	0.7938	-0.3166	skewed:B6	Autosomes	.
4930415C11Rik	ENSMUSG00000114437.2	lncRNA	chr13_59200000	6.67403	29.0176	-1.543	0.1943	0.8215	0.6836	0.6396	0.044	skewed:CAST	Autosomes	.
4930426I24Rik	ENSMUSG00000097323.4	lncRNA	chr12_76450000	32.2726	63.0908	-0.8693	1.1857	2.2536	0.9562	0.8495	0.1068	biallelic	Autosomes	.
4930426L09Rik	ENSMUSG00000026736.4	lncRNA	chr2_19000000	21.0528	18.6472	0.1398	7.402	6.3743	0.5707	0.5102	0.0605	biallelic	Autosomes	.
4930428N03Rik	ENSMUSG00000089887.4	lncRNA	chr14_24700000	40.3747	21.6394	0.7683	0.223	0.1162	0.9071	0.9726	-0.0655	biallelic	Autosomes	.
4930429D17Rik	ENSMUSG00000104956.3	lncRNA	chr5_103350000	7.7854	3.25119	0.6318	0.0451	0.0183	0.5318	0.6617	-0.1299	skewed:B6	Autosomes	.
4930431P19Rik	ENSMUSG00000121788.2	lncRNA	chr7_109350000	19.6858	16.9414	0.17	5.5016	4.6033	0.8419	0.9267	-0.0848	biallelic	Autosomes	.
4930432B10Rik	ENSMUSG00000097007.5	lncRNA	chr10_11100000	4.81521	8.61169	-0.4718	0.0596	0.1036	0.3776	0.5689	-0.1912	biallelic	Autosomes	.
4930432J09Rik	ENSMUSG00000115727.3	lncRNA	chr14_104200000	10.0888	0	1.5935	0.1731	0	0.2419	0.5207	-0.2788	mono:B6	Autosomes	.
4930434J08Rik	ENSMUSG00000120343.2	lncRNA	chr11_20650000	12.1561	17.1776	-0.3704	4.8817	6.7068	0.8767	0.8228	0.0539	biallelic	Autosomes	.
4930439D14Rik	ENSMUSG00000101905.3	lncRNA	chr1_156750000	88.0292	335.868	-1.8735	4.5817	16.9962	0.8301	0.7907	0.0395	skewed:CAST	Autosomes	.
4930442G10Rik	ENSMUSG00000113974.3	lncRNA	chr12_74850000	142.633	216.91	-0.588	3.9144	5.7876	0.6925	0.7293	-0.0368	biallelic	Autosomes	.
4930444P10Rik	ENSMUSG00000067795.14	protein_coding	chr1_16100000	34.1314	7.37818	1.6605	1.0611	0.223	0.4335	0.4603	-0.0268	skewed:B6	Autosomes	.
4930447K03Rik	ENSMUSG00000113591.3	lncRNA	chr13_34250000	23.2342	96.0204	-1.8391	0.6718	2.6992	0.9279	0.9781	-0.0503	skewed:CAST	Autosomes	.
4930452A19Rik	ENSMUSG00000117264.3	lncRNA	chr17_9950000	11.0585	11.4823	-0.0376	0.3738	0.3774	0.9025	0.9511	-0.0485	biallelic	Autosomes	.
4930453N24Rik	ENSMUSG00000059920.10	protein_coding	chr16_64550000	343.318	426.981	-0.3106	15.0372	18.1827	0.4376	0.4628	-0.0252	biallelic	Autosomes	.
4930473A02Rik	ENSMUSG00000060029.16	lncRNA	chr2_130400000	7.38807	12.5255	-0.5005	0.3147	0.5187	0.8015	0.9666	-0.1651	biallelic	Autosomes	.
4930479D17Rik	ENSMUSG00000085238.3	lncRNA	chr6_146550000	6.45176	18.0075	-1.0065	0.6649	1.8044	0.5088	0.7359	-0.2271	skewed:CAST	Autosomes	.
4930481A15Rik	ENSMUSG00000086938.12	lncRNA	chr19_5450000	198.475	1.85027	4.8925	10.4699	0.0949	0.9589	0.9997	-0.0408	mono:B6	Autosomes	.
4930481B07Rik	ENSMUSG00000085956.4	lncRNA	chr3_94900000	17.5909	12.388	0.3776	2.2656	1.5512	0.7445	0.8566	-0.1122	biallelic	Autosomes	.
4930488L21Rik	ENSMUSG00000097520.5	lncRNA	chr8_94400000	6.84909	22.02	-1.1893	0.0328	0.1026	0.4256	0.5968	-0.1712	skewed:CAST	Autosomes	.
4930500G05Rik	ENSMUSG00000120303.2	lncRNA	chrX_12800000	17.3824	14.9009	0.1695	0.1369	0.1141	0.9827	0.7589	0.2238	biallelic	X	ESCAPEE
4930502A04Rik	ENSMUSG00000111303.3	lncRNA	chr9_68450000	240.052	105.843	1.1446	1.8226	0.7813	0.7147	0.6065	0.1082	biallelic	Autosomes	.
4930503L19Rik	ENSMUSG00000044906.7	protein_coding	chr18_70550000	743.467	669.572	0.15	31.1405	27.2672	0.5786	0.604	-0.0254	biallelic	Autosomes	.
4930505N22Rik	ENSMUSG00000097690.4	lncRNA	chr19_45950000	8.75513	16.9873	-0.6767	0.4876	0.9198	0.9587	0.872	0.0867	biallelic	Autosomes	.
4930506C21Rik	ENSMUSG00000087478.4	lncRNA	chr17_8500000	29.3634	71.1244	-1.1475	1.3795	3.2487	0.9712	0.8787	0.0925	skewed:CAST	Autosomes	.
4930507D05Rik	ENSMUSG00000097129.3	lncRNA	chr10_62250000	21.3892	13.8119	0.4883	9.7554	6.1246	0.7153	0.9651	-0.2498	biallelic	Autosomes	.
4930509E16Rik	ENSMUSG00000096986.4	lncRNA	chr9_72400000	14.1899	1.42383	1.5788	0.8332	0.0813	0.9074	0.9967	-0.0893	mono:B6	Autosomes	.
4930509G22Rik	ENSMUSG00000096959.3	lncRNA	chr16_10950000	36.7515	24.9435	0.4796	1.9452	1.2836	0.8185	0.9568	-0.1383	biallelic	Autosomes	.
4930511P09Rik	ENSMUSG00000122432.1	lncRNA	chr18_56500000	148.703	161.589	-0.1161	1.7071	1.8036	0.7648	0.8389	-0.074	biallelic	Autosomes	.
4930513N10Rik	ENSMUSG00000074136.11	lncRNA	chr8_96500000	49.2105	27.525	0.737	2.7867	1.5154	0.8854	0.7651	0.1203	biallelic	Autosomes	.
4930519P11Rik	ENSMUSG00000097602.4	lncRNA	chr2_154450000	16.271	1.42383	1.7274	8.4553	0.7194	0.8942	0.8533	0.0409	mono:B6	Autosomes	.
4930523C07Rik	ENSMUSG00000090394.9	protein_coding	chr1_159850000	50.8528	10.9871	1.8047	1.2067	0.2535	0.5073	0.482	0.0253	skewed:B6	Autosomes	.
4930524O07Rik	ENSMUSG00000090207.4	lncRNA	chr9_106750000	15.0318	7.78171	0.6482	2.8392	1.429	0.8838	0.8109	0.0729	biallelic	Autosomes	.
4930527F14Rik	ENSMUSG00000115324.3	lncRNA	chr14_45750000	128.526	50.3221	1.2712	1.6024	0.61	0.8795	0.6456	0.2339	skewed:B6	Autosomes	.
4930532G15Rik	ENSMUSG00000097261.4	lncRNA	chr1_185050000	12.6478	4.10408	0.9549	3.0818	0.9723	0.9367	0.859	0.0777	skewed:B6	Autosomes	.
4930539J05Rik	ENSMUSG00000097032.5	lncRNA	chr3_135100000	35.0205	8.92361	1.5232	4.1026	1.0164	0.6979	0.7199	-0.022	skewed:B6	Autosomes	.
4930540M05Rik	ENSMUSG00000097831.2	lncRNA	chr6_119850000	15.6514	19.7662	-0.2621	2.049	2.5159	0.9814	0.8026	0.1788	biallelic	Autosomes	.
4930542C16Rik	ENSMUSG00000048628.7	lncRNA	chr14_24600000	5.92658	9.20554	-0.3786	0.2053	0.3101	0.8447	0.9103	-0.0656	biallelic	Autosomes	.
4930546C10Rik	ENSMUSG00000024546.8	lncRNA	chr18_69050000	22.1976	23.1548	-0.0499	0.2726	0.2765	0.7637	0.8459	-0.0822	biallelic	Autosomes	.
4930547M16Rik	ENSMUSG00000097890.5	lncRNA	chr10_39750000	22.1976	0.807072	2.2276	0.7599	0.0269	0.9513	0.8655	0.0858	mono:B6	Autosomes	.
4930549G23Rik	ENSMUSG00000118134.4	lncRNA	chr18_67900000	73.2669	86.3972	-0.2237	1.0683	1.2248	0.8973	0.8863	0.0109	biallelic	Autosomes	.
4930550C14Rik	ENSMUSG00000005131.5	protein_coding	chr9_53300000	16.4323	3.84505	1.2768	0.4355	0.0991	0.4795	0.5288	-0.0492	skewed:B6	Autosomes	.
4930557K07Rik	ENSMUSG00000108034.3	lncRNA	chr6_124950000	4.73458	6.76142	-0.2729	0.1013	0.1406	0.9611	0.8525	0.1086	biallelic	Autosomes	.
4930558J18Rik	ENSMUSG00000097519.5	lncRNA	chr1_57400000	313.911	190.855	0.7034	5.2158	3.0832	0.7319	0.6009	0.131	biallelic	Autosomes	.
4930558N01Rik	ENSMUSG00000120382.2	lncRNA	chr7_98300000	105.356	64.4459	0.6682	49.7605	29.5936	0.8099	0.8576	-0.0477	biallelic	Autosomes	.
4930563E22Rik	ENSMUSG00000053574.6	protein_coding	chr11_72100000	16.8906	23.9161	-0.4016	4.3435	5.9795	0.7182	0.7965	-0.0783	biallelic	Autosomes	.
4930570G19Rik	ENSMUSG00000085084.10	lncRNA	chr3_156050000	196.206	425.889	-1.0986	0.858	1.8108	0.0158	0.2463	-0.2305	biallelic	Autosomes	.
4930578G10Rik	ENSMUSG00000054885.14	lncRNA	chr4_42850000	52.9339	0.403536	3.4224	0.2107	0.0016	0.6837	0.6304	0.0533	mono:B6	Autosomes	.
4930578M01Rik	ENSMUSG00000097587.5	lncRNA	chr15_98850000	105.211	43.0039	1.199	6.7531	2.6837	0.9443	0.8943	0.05	skewed:B6	Autosomes	.
4930579G24Rik	ENSMUSG00000027811.10	protein_coding	chr3_79500000	385.992	375.531	0.0391	87.7176	82.9724	0.5854	0.7678	-0.1824	biallelic	Autosomes	.
4930581F22Rik	ENSMUSG00000070315.15	lncRNA	chr9_35000000	138.148	154.818	-0.1589	8.2303	8.9676	0.9298	0.8854	0.0444	biallelic	Autosomes	.
4930590J08Rik	ENSMUSG00000034063.10	protein_coding	chr6_91900000	45.8095	61.5224	-0.3887	0.8128	1.0613	0.8697	0.6555	0.2142	biallelic	Autosomes	.
4930592C13Rik	ENSMUSG00000105834.4	lncRNA	chr3_157200000	5.0847	8.16234	-0.3842	0.5769	0.9004	0.2416	0.3101	-0.0685	biallelic	Autosomes	.
4930594M22Rik	ENSMUSG00000075463.5	lncRNA	chr14_123150000	8.18273	1.82737	0.9492	0.2473	0.0537	0.7343	0.4692	0.265	skewed:B6	Autosomes	.
4930597O21Rik	ENSMUSG00000053442.6	lncRNA	chr6_66850000	13.4897	8.18525	0.4878	6.1262	3.6141	0.6766	0.5503	0.1263	biallelic	Autosomes	.
4930599N23Rik	ENSMUSG00000073144.7	lncRNA	chr6_39100000	8.9774	3.22829	0.7644	0.2544	0.0889	0.8818	0.7687	0.1131	skewed:B6	Autosomes	.
4931403E22Rik	ENSMUSG00000093772.2	lncRNA	chr19_26700000	3.05082	9.15973	-0.8146	0.0471	0.1374	0.8759	0.6694	0.2066	skewed:CAST	Autosomes	.
4931406C07Rik	ENSMUSG00000031938.16	protein_coding	chr9_15150000	1017.76	965.326	0.0759	37.4388	34.5247	0.7272	0.6258	0.1013	biallelic	Autosomes	.
4931408D14Rik	ENSMUSG00000120174.2	lncRNA	chr19_37200000	2.60627	13.9264	-1.3151	0.234	1.2157	0.7633	0.9237	-0.1604	skewed:CAST	Autosomes	.
4931414P19Rik	ENSMUSG00000022179.6	protein_coding	chr14_54800000	249.223	218.692	0.1846	9.4885	8.095	0.9052	0.8277	0.0775	biallelic	Autosomes	.
4931415C17Rik	ENSMUSG00000054910.7	lncRNA	chr8_12700000	16.9713	0.403536	2.0236	2.0445	0.0473	0.9641	0.8318	0.1324	mono:B6	Autosomes	.
4932441J04Rik	ENSMUSG00000097216.5	lncRNA	chr5_57750000	21.2279	37.8883	-0.7095	0.1185	0.2056	0.1082	0.2172	-0.1091	biallelic	Autosomes	.
4933402D24Rik	ENSMUSG00000025961.3	lncRNA	chr1_63750000	10.6139	16.3476	-0.4512	0.6279	0.9402	0.7268	0.976	-0.2492	biallelic	Autosomes	.
4933404O12Rik	ENSMUSG00000097908.10	lncRNA	chr5_136900000	552.461	472.616	0.223	22.1201	18.3981	0.9103	0.8451	0.0651	biallelic	Autosomes	.
4933405D12Rik	ENSMUSG00000097852.8	lncRNA	chr3_122700000	5.65709	29.6572	-1.7013	0.0571	0.291	0.7504	0.6615	0.0889	skewed:CAST	Autosomes	.
4933405L10Rik	ENSMUSG00000013158.7	protein_coding	chr8_106400000	11.8532	8.20816	0.3516	3.8892	2.6185	0.9381	0.9811	-0.043	biallelic	Autosomes	.
4933406C10Rik	ENSMUSG00000097494.10	lncRNA	chr12_32950000	32.192	11.84	1.1431	0.7813	0.2794	0.926	0.8269	0.0991	skewed:B6	Autosomes	.
4933406I18Rik	ENSMUSG00000087475.6	lncRNA	chr7_114000000	56.0261	70.4231	-0.3056	0.4712	0.5759	0.6206	0.5603	0.0603	biallelic	Autosomes	.
4933407K13Rik	ENSMUSG00000087396.10	lncRNA	chrX_74800000	517.28	24.7531	4.1337	7.6072	0.3539	0.7144	0.7296	-0.0152	mono:B6	X	.
4933407L21Rik	ENSMUSG00000026224.12	protein_coding	chr1_85850000	590.805	812.299	-0.456	41.3666	55.2969	0.7286	0.8188	-0.0902	biallelic	Autosomes	.
4933412E12Rik	ENSMUSG00000112627.4	lncRNA	chr10_116750000	67.8655	24.228	1.3179	2.982	1.035	0.5884	0.6726	-0.0842	skewed:B6	Autosomes	.
4933421A08Rik	ENSMUSG00000086443.3	lncRNA	chr4_122850000	33.1145	19.1494	0.6583	1.7621	0.9907	0.6341	0.801	-0.1669	biallelic	Autosomes	.
4933421O10Rik	ENSMUSG00000144194.3	lncRNA	chr4_33000000	308.67	151.641	1.0018	31.103	14.8561	0.7987	0.9541	-0.1554	biallelic	Autosomes	.
4933424G05Rik	ENSMUSG00000117450.3	lncRNA	chr18_15150000	23.8814	25.4315	-0.0754	0.3438	0.356	0.7948	0.9665	-0.1717	biallelic	Autosomes	.
4933424L21Rik	ENSMUSG00000085719.3	lncRNA	chr11_57500000	34.3065	30.3727	0.1521	0.5261	0.4529	0.8849	0.7741	0.1108	biallelic	Autosomes	.
4933427E11Rik	ENSMUSG00000044276.4	lncRNA	chr15_74550000	9.24689	8.7791	0.0482	5.951	5.4932	0.6904	0.6116	0.0788	biallelic	Autosomes	.
4933430I17Rik	ENSMUSG00000058046.2	protein_coding	chr4_62400000	16.4933	22.4694	-0.3539	0.6198	0.8209	0.7315	0.6575	0.074	biallelic	Autosomes	.
4933431E20Rik	ENSMUSG00000086968.11	lncRNA	chr3_107800000	130.864	0	4.7641	4.9457	0	0.9972	0.8831	0.1141	mono:B6	Autosomes	.
4933431K23Rik	ENSMUSG00000086451.11	lncRNA	chr8_78400000	20.3388	14.4973	0.3781	0.1088	0.0754	0.7758	0.4618	0.314	biallelic	Autosomes	.
4933432I09Rik	ENSMUSG00000116557.3	lncRNA	chr16_18000000	11.0585	1.23351	1.3652	0.491	0.0532	0.9753	0.9603	0.0151	mono:B6	Autosomes	.
4933432K03Rik	ENSMUSG00000108811.3	lncRNA	chr7_121050000	1223.21	1243.76	-0.0239	6.0297	5.9609	0.4706	0.2942	0.1764	biallelic	Autosomes	.
4933433G15Rik	ENSMUSG00000097021.9	lncRNA	chr9_75300000	18.7691	9.32714	0.7303	2.0902	1.0099	0.8967	0.7796	0.1171	biallelic	Autosomes	.
4933439C10Rik	ENSMUSG00000072893.14	lncRNA	chr11_59350000	407.821	357.748	0.1865	43.3983	37.0134	0.9644	0.8261	0.1383	biallelic	Autosomes	.
5031425E22Rik	ENSMUSG00000073147.6	lncRNA	chr5_23550000	650.051	512.629	0.3397	6.7527	5.1774	0.6145	0.7977	-0.1832	biallelic	Autosomes	.
5031434O11Rik	ENSMUSG00000097885.9	lncRNA	chr3_51450000	125.111	30.9894	1.8541	14.3521	3.4563	0.9188	0.9366	-0.0178	skewed:B6	Autosomes	.
5031439G07Rik	ENSMUSG00000036046.15	protein_coding	chr15_84850000	2784.07	1996.61	0.4786	53.0513	36.9902	0.88	0.8261	0.0539	biallelic	Autosomes	.
5033403F01Rik	ENSMUSG00000096932.4	lncRNA	chr13_39150000	56.3624	15.6621	1.5704	0.8181	0.221	0.5924	0.3723	0.2201	skewed:B6	Autosomes	.
5033417F24Rik	ENSMUSG00000097251.4	lncRNA	chr1_92800000	11.7115	241.575	-3.8831	4.1642	83.5118	0.8665	0.8603	0.0062	mono:CAST	Autosomes	.
5033430I15Rik	ENSMUSG00000038152.7	lncRNA	chr13_46100000	6.94352	6.52529	0.0514	0.9282	0.848	0.7316	0.8364	-0.1048	biallelic	Autosomes	.
5330413P13Rik	ENSMUSG00000086822.5	lncRNA	chr2_131650000	110.469	14.6418	2.5555	0.9424	0.1214	0.7972	0.9639	-0.1668	skewed:B6	Autosomes	.
5330434G04Rik	ENSMUSG00000087620.10	lncRNA	chrX_104350000	279.372	0.616757	5.6619	4.6892	0.0101	0.501	0.5752	-0.0741	mono:B6	X	.
5330438D12Rik	ENSMUSG00000052291.12	lncRNA	chr10_116300000	74.0281	43.3017	0.7103	0.5884	0.3346	0.8445	0.4714	0.373	biallelic	Autosomes	.
5330439K02Rik	ENSMUSG00000097827.3	lncRNA	chr15_100350000	26.8988	31.6062	-0.1986	2.4878	2.8421	0.9952	0.9903	0.0049	biallelic	Autosomes	.
5430400D12Rik	ENSMUSG00000097699.4	lncRNA	chr7_79550000	22.9117	42.9968	-0.7821	0.7028	1.2822	0.8824	0.8813	0.0011	biallelic	Autosomes	.
5430402O13Rik	ENSMUSG00000085776.11	lncRNA	chr6_50500000	65.1176	46.248	0.4523	0.6619	0.457	0.8868	0.7555	0.1314	biallelic	Autosomes	.
5430403N17Rik	ENSMUSG00000109761.3	lncRNA	chr8_36350000	6.2767	8.7562	-0.2867	0.2815	0.3819	0.7993	0.7475	0.0518	biallelic	Autosomes	.
5430405H02Rik	ENSMUSG00000085741.11	lncRNA	chr2_156700000	344.792	624.75	-0.8483	10.0162	17.6455	0.9965	0.8431	0.1534	biallelic	Autosomes	.
5430416N02Rik	ENSMUSG00000097772.10	lncRNA	chr5_100550000	417.518	560.751	-0.4212	35.9738	46.9742	0.6226	0.8277	-0.2051	biallelic	Autosomes	.
5430427G11Rik	ENSMUSG00000119988.2	lncRNA	chr10_43050000	6.32391	6.35788	-0.0043	2.7458	2.684	0.8357	0.8825	-0.0468	biallelic	Autosomes	.
5430431A17Rik	ENSMUSG00000108322.5	lncRNA	chr7_44100000	203.29	92.9999	1.0877	13.6331	6.0638	0.7641	0.7867	-0.0227	biallelic	Autosomes	.
5530601H04Rik	ENSMUSG00000087174.10	lncRNA	chrX_104000000	412.703	377.08	0.1286	2.5955	2.3057	0.3149	0.8429	-0.528	biallelic	X	ESCAPEE
5730405O15Rik	ENSMUSG00000087424.4	lncRNA	chrX_12900000	62.3028	22.8042	1.2754	4.2151	1.5	0.9517	0.9088	0.0428	skewed:B6	X	ESCAPEE
5730409E04Rik	ENSMUSG00000073755.5	protein_coding	chr4_126500000	46.7103	5.64951	2.2797	8.7219	1.0256	0.6958	0.8649	-0.1691	skewed:B6	Autosomes	.
5730414N17Rik	ENSMUSG00000116506.2	lncRNA	chr15_98750000	82.3053	72.8144	0.166	48.6592	41.8537	0.9661	0.9359	0.0302	biallelic	Autosomes	.
5730471H19Rik	ENSMUSG00000087179.11	lncRNA	chr2_156650000	809.341	1455.25	-0.8425	9.7924	17.1188	0.9688	0.8541	0.1147	biallelic	Autosomes	.
5730480H06Rik	ENSMUSG00000029089.9	protein_coding	chr5_48500000	546.348	403.493	0.4327	5.3795	3.8627	0.2325	0.4152	-0.1827	biallelic	Autosomes	.
5730522E02Rik	ENSMUSG00000032985.16	protein_coding	chr11_25650000	30.6498	35.5428	-0.1856	0.0429	0.0483	0.0712	0.4168	-0.3456	biallelic	Autosomes	.
5830408C22Rik	ENSMUSG00000110148.4	lncRNA	chr8_25550000	282.959	307.156	-0.1164	25.4694	26.8802	0.9064	0.7635	0.1429	biallelic	Autosomes	.
5830448L01Rik	ENSMUSG00000115007.4	lncRNA	chr14_34350000	29.5523	41.4972	-0.4284	18.5007	25.2577	0.6489	0.7058	-0.0569	biallelic	Autosomes	.
5830454E08Rik	ENSMUSG00000052658.6	lncRNA	chr9_120400000	44.3146	13.4083	1.4217	50.7054	14.9163	0.8677	0.7346	0.1331	skewed:B6	Autosomes	.
5930403N24Rik	ENSMUSG00000046463.7	lncRNA	chr10_37000000	280.017	190.948	0.5406	19.8413	13.1547	0.6482	0.7435	-0.0953	biallelic	Autosomes	.
6030442K20Rik	ENSMUSG00000097760.4	lncRNA	chr1_132400000	58.113	44.5881	0.3479	1.0906	0.8136	0.9962	0.8462	0.15	biallelic	Autosomes	.
6030443J06Rik	ENSMUSG00000097207.10	lncRNA	chr5_22800000	272.247	260.82	0.0607	0.8989	0.8373	0.589	0.3868	0.2022	biallelic	Autosomes	.
6030458C11Rik	ENSMUSG00000022195.8	protein_coding	chr15_12800000	1249.9	1423.49	-0.1869	64.5098	71.4306	0.6719	0.7761	-0.1042	biallelic	Autosomes	.
6230400D17Rik	ENSMUSG00000097577.5	lncRNA	chr14_20750000	46.6848	70.1112	-0.5393	2.4459	3.5713	0.876	0.9923	-0.1163	biallelic	Autosomes	.
6230426M11Rik	ENSMUSG00000120051.2	lncRNA	chr12_104700000	30.6498	40.0505	-0.3376	30.9098	39.2695	0.681	0.6399	0.0411	biallelic	Autosomes	.
6330403K07Rik	ENSMUSG00000018451.8	protein_coding	chr11_70900000	1976.12	3422.88	-0.791	1068.7	1799.76	0.8979	0.702	0.1958	biallelic	Autosomes	.
6330403L08Rik	ENSMUSG00000075585.5	lncRNA	chr5_138950000	39.2161	61.9788	-0.5991	6.0343	9.2723	0.7552	0.889	-0.1338	biallelic	Autosomes	.
6330408M09Rik	ENSMUSG00000116733.4	lncRNA	chr16_22900000	29.3024	23.4667	0.269	17.5309	13.65	0.7663	0.9955	-0.2292	biallelic	Autosomes	.
6330418K02Rik	ENSMUSG00000085227.4	lncRNA	chr5_138250000	100.744	102.463	-0.0233	32.578	32.2145	0.8229	0.7533	0.0696	biallelic	Autosomes	.
6330562C20Rik	ENSMUSG00000093424.6	lncRNA	chr3_95200000	66.943	52.1795	0.3314	7.0209	5.3207	0.9313	0.9945	-0.0632	biallelic	Autosomes	.
6330576A10Rik	ENSMUSG00000115821.3	lncRNA	chr14_100650000	19.9415	6.6698	1.0958	0.531	0.1727	0.7317	0.5844	0.1473	skewed:B6	Autosomes	.
6430548M08Rik	ENSMUSG00000031824.16	protein_coding	chr8_120850000	1002.82	556.389	0.8442	16.6662	8.9903	0.8904	0.9205	-0.0301	biallelic	Autosomes	.
6430550D23Rik	ENSMUSG00000074646.12	protein_coding	chr2_155800000	116.417	64.652	0.8017	2.8524	1.5401	0.9443	0.927	0.0173	biallelic	Autosomes	.
6430571L13Rik	ENSMUSG00000037977.7	protein_coding	chr9_107200000	34.1314	42.091	-0.2671	2.4549	2.9434	0.8845	0.9314	-0.0469	biallelic	Autosomes	.
6430584L05Rik	ENSMUSG00000108228.4	lncRNA	chr6_55350000	53.8978	135.715	-1.2565	2.9247	7.1601	0.8236	0.8269	-0.0034	skewed:CAST	Autosomes	.
6430590A07Rik	ENSMUSG00000097583.4	lncRNA	chr3_40800000	79.8051	100.475	-0.3147	2.1925	2.6838	0.8134	0.6396	0.1738	biallelic	Autosomes	.
6530401F13Rik	ENSMUSG00000091947.4	lncRNA	chr12_81600000	43.7422	36.3957	0.2357	0.649	0.525	0.6634	0.7565	-0.0931	biallelic	Autosomes	.
6530411M01Rik	ENSMUSG00000097049.3	lncRNA	chr17_9450000	64.4508	137.32	-1.0351	0.5067	1.0496	0.9165	0.7957	0.1208	biallelic	Autosomes	.
6530437J22Rik	ENSMUSG00000109111.3	lncRNA	chr7_44600000	23.309	1.21061	2.1885	5.1086	0.258	0.8655	0.9121	-0.0466	mono:B6	Autosomes	.
6720427I07Rik	ENSMUSG00000097375.5	lncRNA	chr13_48650000	87.4627	99.1429	-0.1716	3.2543	3.5865	0.9279	0.8902	0.0377	biallelic	Autosomes	.
6720483E21Rik	ENSMUSG00000097934.3	lncRNA	chr1_20950000	17.1601	81.2745	-1.961	6.0409	27.8171	0.7152	0.6045	0.1107	skewed:CAST	Autosomes	.
6820408C15Rik	ENSMUSG00000032680.12	protein_coding	chr2_152250000	49.1494	29.6872	0.6425	1.4537	0.8537	0.8721	0.7131	0.159	biallelic	Autosomes	.
6820445E23Rik	ENSMUSG00000120289.2	lncRNA	chr11_26300000	76.8487	50.8772	0.5507	26.1751	16.8482	0.3573	0.4115	-0.0542	biallelic	Autosomes	.
8030451A03Rik	ENSMUSG00000073821.13	lncRNA	chr4_64050000	22.3923	16.4005	0.3561	0.1119	0.0797	0.7281	0.5614	0.1668	biallelic	Autosomes	.
8430419K02Rik	ENSMUSG00000085743.3	lncRNA	chr11_18800000	26.0097	33.2432	-0.3025	0.6833	0.8491	0.8704	0.9794	-0.1091	biallelic	Autosomes	.
8430429K09Rik	ENSMUSG00000034587.11	lncRNA	chr11_3400000	232.791	29.5656	2.7823	5.5846	0.6896	0.9518	0.7807	0.1711	skewed:B6	Autosomes	.
8430432A02Rik	ENSMUSG00000041878.4	lncRNA	chr1_43100000	7.91325	3.86795	0.5422	5.3949	2.5638	0.6914	0.6581	0.0333	biallelic	Autosomes	.
9030407P20Rik	ENSMUSG00000097343.4	lncRNA	chr7_120250000	101.505	277.123	-1.4054	19.1681	50.8795	0.5983	0.6067	-0.0085	skewed:CAST	Autosomes	.
9030622O22Rik	ENSMUSG00000086141.10	lncRNA	chr2_147850000	0.397333	11.3906	-1.6026	0.0035	0.0974	0.5244	0.2224	0.302	mono:CAST	Autosomes	.
9130004C02Rik	ENSMUSG00000120169.2	lncRNA	chr9_25150000	75.2732	149.35	-0.9432	11.4091	22.0088	0.7273	0.6861	0.0412	biallelic	Autosomes	.
9130008F23Rik	ENSMUSG00000054951.4	protein_coding	chr17_41150000	23.2146	2.65734	1.8815	3.8873	0.4326	0.4983	0.4461	0.0522	skewed:B6	Autosomes	.
9130019P16Rik	ENSMUSG00000073067.12	lncRNA	chr6_54300000	7.91325	7.47687	0.0496	0.0419	0.0385	0.8812	0.7456	0.1356	biallelic	Autosomes	.
9130024F11Rik	ENSMUSG00000087022.7	lncRNA	chr1_57050000	13.6648	16.4163	-0.1984	0.1467	0.1714	0.4752	0.3287	0.1466	biallelic	Autosomes	.
9130213A22Rik	ENSMUSG00000097386.3	lncRNA	chr11_69000000	15.1735	12.5025	0.2049	4.3463	3.4818	0.9365	0.927	0.0095	biallelic	Autosomes	.
9130221H12Rik	ENSMUSG00000090330.4	lncRNA	chr7_24900000	182.294	190.687	-0.0632	100.635	102.347	0.9384	0.8476	0.0909	biallelic	Autosomes	.
9130230N09Rik	ENSMUSG00000092626.4	lncRNA	chr11_22800000	7.83261	8.18525	-0.0391	0.2919	0.2965	0.5365	0.7481	-0.2116	biallelic	Autosomes	.
9130401M01Rik	ENSMUSG00000101892.2	protein_coding	chr15_57850000	276.572	223.871	0.299	19.4868	15.3359	0.8317	0.734	0.0978	biallelic	Autosomes	.
9130604C24Rik	ENSMUSG00000105851.2	lncRNA	chr5_137500000	34.5287	20.1926	0.6499	30.7379	17.4769	0.9808	0.9358	0.045	biallelic	Autosomes	.
9230105E05Rik	ENSMUSG00000090191.3	lncRNA	chr10_120200000	334.039	141.331	1.2122	67.6314	27.8206	0.8795	0.7368	0.1428	skewed:B6	Autosomes	.
9230111E07Rik	ENSMUSG00000087624.3	lncRNA	chr2_167600000	7.38807	9.13683	-0.1905	0.3337	0.4012	0.9516	0.6865	0.265	biallelic	Autosomes	.
9230112E08Rik	ENSMUSG00000070461.4	lncRNA	chr2_180600000	114.934	83.8543	0.4327	29.1588	20.6836	0.7492	0.9047	-0.1556	biallelic	Autosomes	.
9230114K14Rik	ENSMUSG00000097145.8	lncRNA	chr5_52300000	625.322	595.64	0.0696	3.5823	3.3176	0.9363	0.6365	0.2999	biallelic	Autosomes	.
9230116N13Rik	ENSMUSG00000097403.4	lncRNA	chr1_136300000	24.44	31.4159	-0.3068	5.7668	7.2071	0.928	0.9485	-0.0205	biallelic	Autosomes	.
9330020H09Rik	ENSMUSG00000091050.4	lncRNA	chr15_98450000	62.4445	41.9007	0.5241	22.9121	14.9476	0.9391	0.9219	0.0171	biallelic	Autosomes	.
9330104G04Rik	ENSMUSG00000097842.4	lncRNA	chr7_16600000	181.124	143.992	0.321	32.1466	24.8472	0.9333	0.9473	-0.0141	biallelic	Autosomes	.
9330111N05Rik	ENSMUSG00000097098.10	lncRNA	chr13_81200000	18.7219	22.4764	-0.212	0.0959	0.1119	0.3661	0.5855	-0.2194	biallelic	Autosomes	.
9330117O12Rik	ENSMUSG00000118154.3	lncRNA	chr18_54750000	10.9641	3.44151	0.9193	0.331	0.101	0.9281	0.8497	0.0785	skewed:B6	Autosomes	.
9330118I20Rik	ENSMUSG00000108242.2	lncRNA	chr6_63200000	35.1956	31.2026	0.1509	3.2769	2.8245	0.2991	0.3608	-0.0617	biallelic	Autosomes	.
9330133O14Rik	ENSMUSG00000121107.1	lncRNA	chr8_123150000	215.141	147.883	0.526	64.1762	42.8891	0.8845	0.9273	-0.0427	biallelic	Autosomes	.
9330136K24Rik	ENSMUSG00000097781.3	lncRNA	chr17_21700000	9.15246	13.0964	-0.3546	0.5826	0.8106	0.675	0.4551	0.22	biallelic	Autosomes	.
9330151L19Rik	ENSMUSG00000097061.4	lncRNA	chr12_69200000	407.335	112.689	1.8088	76.9547	20.6987	0.8837	0.7757	0.108	skewed:B6	Autosomes	.
9330154J02Rik	ENSMUSG00000056031.16	lncRNA	chr9_85700000	8.00767	36.3341	-1.668	0.2827	1.2471	0.461	0.5123	-0.0513	skewed:CAST	Autosomes	.
9330159F19Rik	ENSMUSG00000004360.10	protein_coding	chr10_29100000	438.801	886.689	-1.0066	19.4569	38.2258	0.2149	0.4326	-0.2177	biallelic	Autosomes	.
9330160F10Rik	ENSMUSG00000072809.4	lncRNA	chr11_68900000	54.5312	6.92883	2.3192	16.7424	2.0683	0.8885	0.9297	-0.0412	skewed:B6	Autosomes	.
9330179D12Rik	ENSMUSG00000097166.4	lncRNA	chr6_127100000	9.54979	17.3679	-0.6204	0.1288	0.2277	0.7731	0.5632	0.2099	biallelic	Autosomes	.
9330188P03Rik	ENSMUSG00000115149.4	lncRNA	chr14_105800000	2216.3	3602.82	-0.6997	44.0942	69.6908	0.9062	0.7447	0.1616	biallelic	Autosomes	.
9330198I05Rik	ENSMUSG00000104904.3	lncRNA	chr5_108500000	8.40501	12.67	-0.3985	1.4651	2.1473	0.6132	0.5386	0.0746	biallelic	Autosomes	.
9430002A10Rik	ENSMUSG00000062704.4	lncRNA	chr8_88900000	11.267	2.44412	1.1278	20.2081	4.2621	0.8114	0.7779	0.0336	skewed:B6	Autosomes	.
9430015G10Rik	ENSMUSG00000059939.14	protein_coding	chr4_156200000	1426.07	2054.74	-0.5254	70.1483	98.2681	0.6787	0.8536	-0.1749	biallelic	Autosomes	.
9430037G07Rik	ENSMUSG00000097073.9	lncRNA	chr9_88400000	39.5859	53.9681	-0.4033	1.0028	1.3292	0.5735	0.5059	0.0677	biallelic	Autosomes	.
9430038I01Rik	ENSMUSG00000040139.15	protein_coding	chr7_137000000	234.614	325.486	-0.4639	5.6683	7.6456	0.5757	0.9531	-0.3774	biallelic	Autosomes	.
9430041J12Rik	ENSMUSG00000086155.10	lncRNA	chr7_4050000	245.712	273.167	-0.1499	4.4824	4.845	0.6506	0.4568	0.1938	biallelic	Autosomes	.
9430065F17Rik	ENSMUSG00000097360.10	lncRNA	chr13_67700000	43.9035	65.4891	-0.5275	3.3556	4.8666	0.2992	0.5173	-0.2181	biallelic	Autosomes	.
9430078K24Rik	ENSMUSG00000112765.3	lncRNA	chr12_79950000	33.6672	8.39847	1.529	1.4308	0.347	0.9749	0.9767	-0.0018	skewed:B6	Autosomes	.
9530051G07Rik	ENSMUSG00000085982.3	lncRNA	chrX_151850000	131.795	1.21061	4.4611	3.1753	0.0284	0.2925	0.3765	-0.084	mono:B6	X	.
9530052E02Rik	ENSMUSG00000096938.9	lncRNA	chr8_11050000	18.1633	10.7281	0.5585	0.2627	0.1508	0.8724	0.7461	0.1263	biallelic	Autosomes	.
9530056K15Rik	ENSMUSG00000045345.9	lncRNA	chr5_143350000	53.7896	35.6186	0.5334	3.5093	2.2593	0.861	0.8678	-0.0068	biallelic	Autosomes	.
9530062K07Rik	ENSMUSG00000108030.3	lncRNA	chr6_116150000	154.908	23.1777	2.5046	10.395	1.5122	0.78	0.7578	0.0223	skewed:B6	Autosomes	.
9530068E07Rik	ENSMUSG00000036275.14	protein_coding	chr11_52250000	9151.42	8227.58	0.1534	632.528	552.895	0.9648	0.864	0.1008	biallelic	Autosomes	.
9630013D21Rik	ENSMUSG00000059027.17	lncRNA	chr4_109450000	32.7644	59.6951	-0.7766	0.9736	1.7246	0.5847	0.4729	0.1118	biallelic	Autosomes	.
9630014M24Rik	ENSMUSG00000118257.3	lncRNA	chr18_38750000	19.5303	6.6927	1.069	0.0702	0.0234	0.9816	0.8526	0.1289	skewed:B6	Autosomes	.
9630015K15Rik	ENSMUSG00000114284.2	lncRNA	chr14_64350000	12.0144	0.403536	1.6548	0.9046	0.0295	0.7924	0.8979	-0.1055	mono:B6	Autosomes	.
9630028B13Rik	ENSMUSG00000051295.10	lncRNA	chr1_185150000	179.334	369.053	-1.0209	12.2321	24.4741	0.7603	0.7336	0.0267	biallelic	Autosomes	.
9830004L10Rik	ENSMUSG00000099552.3	lncRNA	chr1_80200000	28.1576	41.3069	-0.4819	0.5326	0.7597	0.7311	0.6909	0.0402	biallelic	Autosomes	.
9930012K11Rik	ENSMUSG00000044551.14	protein_coding	chr14_70350000	14.1899	15.2357	-0.0766	2.3668	2.4707	0.9839	0.9052	0.0787	biallelic	Autosomes	.
9930014A18Rik	ENSMUSG00000097493.4	lncRNA	chr15_60650000	134.468	212.269	-0.6395	12.0057	18.4261	0.7794	0.683	0.0963	biallelic	Autosomes	.
A030001D20Rik	ENSMUSG00000110357.4	lncRNA	chr7_45250000	33.2757	205.23	-2.4575	2.7298	16.3694	0.9574	0.9544	0.003	skewed:CAST	Autosomes	.
A130010J15Rik	ENSMUSG00000079144.8	protein_coding	chr1_192850000	364.644	360.428	0.0166	31.6782	30.4431	0.5815	0.4665	0.115	biallelic	Autosomes	.
A130014A01Rik	ENSMUSG00000097944.4	lncRNA	chr8_120800000	28.1104	36.068	-0.3107	4.7806	5.9637	0.881	0.8792	0.0018	biallelic	Autosomes	.
A130051J06Rik	ENSMUSG00000097643.3	lncRNA	chr15_95700000	21.3557	0	2.3981	0.754	0	0.7447	0.916	-0.1713	mono:B6	Autosomes	.
A230028O05Rik	ENSMUSG00000096960.4	lncRNA	chr16_24850000	9.89991	4.05827	0.718	0.8134	0.3242	0.8051	0.7193	0.0858	skewed:B6	Autosomes	.
A230045G11Rik	ENSMUSG00000121789.2	lncRNA	chr17_3150000	676.271	566.545	0.2534	35.8258	29.1802	0.9613	0.8682	0.0931	biallelic	Autosomes	.
A230056P14Rik	ENSMUSG00000087178.10	lncRNA	chr7_55600000	209.596	13.2638	3.5546	7.4815	0.4603	0.842	0.8562	-0.0143	mono:B6	Autosomes	.
A230057D06Rik	ENSMUSG00000109394.4	lncRNA	chr7_61550000	1429.67	1135.55	0.331	5.4219	4.187	0.4273	0.2216	0.2057	biallelic	Autosomes	.
A230070E04Rik	ENSMUSG00000129504.1	lncRNA	chr14_68350000	3.40094	10.4162	-0.8758	0.2342	0.6974	0.5234	0.8539	-0.3305	skewed:CAST	Autosomes	.
A230072C01Rik	ENSMUSG00000086877.10	lncRNA	chrX_20800000	410.269	156.02	1.3668	13.5627	5.0146	0.8011	0.6973	0.1038	skewed:B6	X	ESCAPEE
A230083G16Rik	ENSMUSG00000055818.4	lncRNA	chr6_124900000	23.962	42.2585	-0.7064	1.3077	2.2422	0.6497	0.8628	-0.2131	biallelic	Autosomes	.
A230083N12Rik	ENSMUSG00000085482.3	lncRNA	chr4_74150000	23.9286	9.79939	0.967	13.1329	5.2291	0.4674	0.6098	-0.1424	skewed:B6	Autosomes	.
A230087F16Rik	ENSMUSG00000097381.4	lncRNA	chr12_111250000	8.35779	15.1828	-0.5954	0.3717	0.6564	0.9134	0.9577	-0.0443	biallelic	Autosomes	.
A230103J11Rik	ENSMUSG00000087026.9	lncRNA	chr8_85750000	6.84909	6.52529	0.04	0.7264	0.6728	0.8746	0.8871	-0.0124	biallelic	Autosomes	.
A230107N01Rik	ENSMUSG00000097292.4	lncRNA	chr13_84350000	34.4815	17.4208	0.8163	3.2221	1.5827	0.3694	0.5566	-0.1872	biallelic	Autosomes	.
A2m	ENSMUSG00000030111.10	protein_coding	chr6_121650000	2524.38	5872.5	-1.2164	48.9408	110.693	0.204	0.1144	0.0896	biallelic	Autosomes	.
A330009N23Rik	ENSMUSG00000097915.5	lncRNA	chr15_101100000	10.1694	5.71822	0.5011	0.4031	0.2204	0.8548	0.7905	0.0643	biallelic	Autosomes	.
A330015K06Rik	ENSMUSG00000104093.4	lncRNA	chr3_65200000	11.2808	3.86795	0.8765	0.0565	0.0188	0.8366	0.5129	0.3237	skewed:B6	Autosomes	.
A330032B11Rik	ENSMUSG00000097591.2	lncRNA	chr19_37150000	9.77207	6.71561	0.3344	0.366	0.2446	0.9838	0.8051	0.1787	biallelic	Autosomes	.
A330035P11Rik	ENSMUSG00000085615.5	lncRNA	chr14_122300000	172.044	208.94	-0.2731	15.2199	17.971	0.6543	0.5544	0.0999	biallelic	Autosomes	.
A330041J22Rik	ENSMUSG00000087466.5	lncRNA	chr9_86550000	9.64422	13.6673	-0.3502	1.4153	1.9501	0.7471	0.8109	-0.0638	biallelic	Autosomes	.
A330069E16Rik	ENSMUSG00000120340.2	lncRNA	chr2_91050000	41.2028	75.6691	-0.804	1.9742	3.5251	0.9193	0.8794	0.04	biallelic	Autosomes	.
A330074K22Rik	ENSMUSG00000097960.3	lncRNA	chr8_120900000	7.86603	32.5049	-1.5435	0.2798	1.1241	0.7803	0.96	-0.1798	skewed:CAST	Autosomes	.
A330076H08Rik	ENSMUSG00000109321.3	lncRNA	chr7_61550000	1977.32	1169.59	0.755	30.6878	17.6482	0.4273	0.2216	0.2057	biallelic	Autosomes	.
A330084C13Rik	ENSMUSG00000114210.5	lncRNA	chr18_65000000	30.2997	32.3375	-0.081	5.8056	6.0241	0.9626	0.8566	0.106	biallelic	Autosomes	.
A330093E20Rik	ENSMUSG00000098284.10	lncRNA	chr18_45900000	25.8012	167.293	-2.4838	0.0606	0.3822	0.0252	0.3929	-0.3677	skewed:CAST	Autosomes	.
A330102I10Rik	ENSMUSG00000086363.10	lncRNA	chr13_29200000	156.479	151.763	0.0428	1.1834	1.1158	0.6503	0.7877	-0.1374	biallelic	Autosomes	.
A3galt2	ENSMUSG00000028794.14	protein_coding	chr4_128600000	10.4723	28.5682	-1.1174	0.6389	1.6947	0.7658	0.9066	-0.1409	skewed:CAST	Autosomes	.
A430005L14Rik	ENSMUSG00000047613.11	protein_coding	chr4_154000000	607.532	635.53	-0.0645	110.174	112.053	0.5853	0.7058	-0.1205	biallelic	Autosomes	.
A430018G15Rik	ENSMUSG00000085315.10	lncRNA	chr2_52300000	123.697	43.3704	1.4118	9.9293	3.3848	0.747	0.7047	0.0423	skewed:B6	Autosomes	.
A430027H14Rik	ENSMUSG00000104507.3	lncRNA	chr1_189050000	40.9609	30.1295	0.3877	2.8789	2.0589	0.5159	0.7656	-0.2497	biallelic	Autosomes	.
A430033K04Rik	ENSMUSG00000056014.17	protein_coding	chr5_138600000	703.541	462.286	0.6005	20.2374	12.9287	0.7487	0.5901	0.1586	biallelic	Autosomes	.
A430035B10Rik	ENSMUSG00000087305.11	lncRNA	chr6_8500000	97.2761	139.035	-0.4939	3.8225	5.3118	0.4825	0.5659	-0.0834	biallelic	Autosomes	.
A430046D13Rik	ENSMUSG00000119994.2	lncRNA	chr10_128350000	258.325	205.37	0.3239	10.4888	8.1073	0.9377	0.7933	0.1445	biallelic	Autosomes	.
A430057M04Rik	ENSMUSG00000090564.11	lncRNA	chr14_21850000	5.92658	20.4517	-1.2199	0.5369	1.8014	0.9344	0.848	0.0863	skewed:CAST	Autosomes	.
A430078I02Rik	ENSMUSG00000085589.8	lncRNA	chr6_86450000	19.5441	5.4821	1.2275	1.5745	0.4294	0.9576	0.8156	0.1419	skewed:B6	Autosomes	.
A430102K17Rik	ENSMUSG00000107288.3	lncRNA	chr5_115450000	9.77207	3.86795	0.7362	2.0412	0.7855	0.7861	0.9896	-0.2035	skewed:B6	Autosomes	.
A430105J06Rik	ENSMUSG00000097784.3	lncRNA	chr1_186450000	130.749	25.1954	2.1685	26.637	4.9905	0.6383	0.5149	0.1234	skewed:B6	Autosomes	.
A430108G06Rik	ENSMUSG00000086851.3	lncRNA	chr11_53450000	18.4466	14.7105	0.2504	5.8868	4.5643	0.9261	0.9497	-0.0236	biallelic	Autosomes	.
A530001N23Rik	ENSMUSG00000114452.3	lncRNA	chr13_60650000	30.1247	116.946	-1.7957	1.0129	3.8231	0.6398	0.7763	-0.1365	skewed:CAST	Autosomes	.
A530017D24Rik	ENSMUSG00000072847.6	lncRNA	chr11_61750000	218.815	127.787	0.7532	65.1579	36.9961	0.9564	0.9617	-0.0053	biallelic	Autosomes	.
A530072M11Rik	ENSMUSG00000085112.4	lncRNA	chr4_16200000	116.565	125.207	-0.0991	0.9598	1.0023	0.0842	0.3766	-0.2924	biallelic	Autosomes	.
A530083I20Rik	ENSMUSG00000097322.10	lncRNA	chr9_122700000	5.87937	28.4008	-1.6183	0.2602	1.2223	0.7265	0.846	-0.1195	skewed:CAST	Autosomes	.
A630001G21Rik	ENSMUSG00000052760.17	protein_coding	chr1_85650000	41.1418	2.25381	2.6693	0.5682	0.0303	0.4661	0.5964	-0.1303	mono:B6	Autosomes	.
A630052C17Rik	ENSMUSG00000086725.3	lncRNA	chr11_29100000	83.2336	113.968	-0.4312	25.7594	34.2925	0.5258	0.8399	-0.3142	biallelic	Autosomes	.
A630066F11Rik	ENSMUSG00000120335.2	lncRNA	chr10_7500000	21.4836	20.3601	0.0625	13.8892	12.7976	0.8335	0.8473	-0.0137	biallelic	Autosomes	.
A630072M18Rik	ENSMUSG00000101013.2	lncRNA	chr5_21150000	217.47	129.667	0.7242	34.1805	19.8147	0.7956	0.7117	0.0838	biallelic	Autosomes	.
A630089N07Rik	ENSMUSG00000116673.2	protein_coding	chr16_97850000	300.255	245.278	0.2865	3.1459	2.4986	0.6286	0.3659	0.2627	biallelic	Autosomes	.
A730020E08Rik	ENSMUSG00000097924.4	lncRNA	chr6_61050000	123.508	47.626	1.288	1.2977	0.4865	0.5033	0.3712	0.1321	skewed:B6	Autosomes	.
A730020M07Rik	ENSMUSG00000044522.10	lncRNA	chr3_121400000	7.69097	12.388	-0.4543	0.5676	0.8889	0.863	0.7059	0.1571	biallelic	Autosomes	.
A730035I17Rik	ENSMUSG00000045238.11	lncRNA	chr5_98300000	95.2619	64.0723	0.5376	28.2875	18.498	0.4304	0.5063	-0.0758	biallelic	Autosomes	.
A730056A06Rik	ENSMUSG00000097756.4	lncRNA	chr7_73000000	234.88	249.706	-0.0865	3.0429	3.1452	0.7111	0.8675	-0.1565	biallelic	Autosomes	.
A730063M14Rik	ENSMUSG00000112639.3	lncRNA	chr10_126900000	240.092	218.327	0.1342	46.1381	40.7913	0.9748	0.968	0.0068	biallelic	Autosomes	.
A730081D07Rik	ENSMUSG00000086693.4	lncRNA	chr13_41150000	66.0873	48.197	0.4182	1.2542	0.8893	0.6206	0.4992	0.1214	biallelic	Autosomes	.
A730090N16Rik	ENSMUSG00000090120.3	lncRNA	chr3_65200000	21.4364	69.935	-1.5031	0.7257	2.302	0.8366	0.5129	0.3237	skewed:CAST	Autosomes	.
A830005F24Rik	ENSMUSG00000053181.3	lncRNA	chr13_48650000	61.4747	91.1039	-0.5318	32.0238	46.1415	0.9279	0.8902	0.0377	biallelic	Autosomes	.
A830019P07Rik	ENSMUSG00000094707.5	lncRNA	chr19_35800000	33.62	16.7969	0.8252	0.3192	0.1551	0.3205	0.36	-0.0395	biallelic	Autosomes	.
A830021F12Rik	ENSMUSG00000117645.3	lncRNA	chr18_15450000	26.0097	38.505	-0.4885	1.7538	2.5243	0.3821	0.8235	-0.4414	biallelic	Autosomes	.
A830035A12Rik	ENSMUSG00000059706.6	lncRNA	chr11_107400000	6.32391	9.03813	-0.31	0.1454	0.2021	0.9144	0.9071	0.0073	biallelic	Autosomes	.
A830035O19Rik	ENSMUSG00000111329.3	lncRNA	chr9_45850000	7.29364	5.505	0.2268	3.2652	2.3961	0.8768	0.9827	-0.1059	biallelic	Autosomes	.
A830052D11Rik	ENSMUSG00000097413.4	lncRNA	chr18_32500000	31.4917	80.7759	-1.233	0.3912	0.9756	0.7433	0.6813	0.062	skewed:CAST	Autosomes	.
A830082K12Rik	ENSMUSG00000087143.12	lncRNA	chr13_78300000	790.788	710.617	0.1532	8.2558	7.213	0.4596	0.6513	-0.1916	biallelic	Autosomes	.
A830082N09Rik	ENSMUSG00000112280.2	lncRNA	chr10_33850000	184.937	197.163	-0.09	20.0567	20.7894	0.7141	0.4176	0.2965	biallelic	Autosomes	.
A830092H15Rik	ENSMUSG00000074664.5	lncRNA	chr3_26350000	14.5873	17.7943	-0.2188	5.5438	6.5749	0.8435	0.7558	0.0877	biallelic	Autosomes	.
A930001A20Rik	ENSMUSG00000098008.3	lncRNA	chr3_15000000	31.2832	12.3122	1.0675	0.2957	0.1132	0.515	0.8937	-0.3787	skewed:B6	Autosomes	.
A930001C03Rik	ENSMUSG00000087132.11	lncRNA	chr19_4450000	37.6798	44.3361	-0.2091	3.2078	3.6698	0.9357	0.9891	-0.0534	biallelic	Autosomes	.
A930003A15Rik	ENSMUSG00000075330.5	protein_coding	chr16_19700000	15.4292	12.1748	0.2503	1.702	1.3057	0.6365	0.5487	0.0878	biallelic	Autosomes	.
A930003O13Rik	ENSMUSG00000105076.2	lncRNA	chr5_22900000	18.2243	7.80462	0.859	1.9374	0.8067	0.5597	0.4382	0.1215	skewed:B6	Autosomes	.
A930004D18Rik	ENSMUSG00000054057.4	lncRNA	chr2_18000000	142.136	65.0168	1.0714	6.6555	2.9599	0.8164	0.6774	0.139	biallelic	Autosomes	.
A930005G22Rik	ENSMUSG00000124350.1	lncRNA	chr5_115550000	19.0662	34.5155	-0.7154	1.8184	3.2005	0.9428	0.9674	-0.0246	biallelic	Autosomes	.
A930005H10Rik	ENSMUSG00000054426.14	lncRNA	chr3_115650000	267.255	262.582	0.025	34.572	33.025	0.6114	0.7148	-0.1034	biallelic	Autosomes	.
A930007A09Rik	ENSMUSG00000118559.3	protein_coding	chr16_13550000	39.6941	15.5634	1.12	8.4981	3.2395	0.8548	0.8569	-0.0021	skewed:B6	Autosomes	.
A930007I19Rik	ENSMUSG00000097855.11	lncRNA	chr19_29400000	78.7213	121.438	-0.5948	1.1442	1.7161	0.743	0.893	-0.1499	biallelic	Autosomes	.
A930009A15Rik	ENSMUSG00000092210.2	protein_coding	chr10_115400000	11.8532	3.46442	0.9935	0.8086	0.2298	0.5456	0.5513	-0.0057	skewed:B6	Autosomes	.
A930012L18Rik	ENSMUSG00000097610.5	lncRNA	chr18_44750000	26.0431	7.35527	1.3291	1.5159	0.4162	0.6734	0.7488	-0.0753	skewed:B6	Autosomes	.
A930012O16Rik	ENSMUSG00000054181.13	lncRNA	chr2_57100000	30.7639	94.7198	-1.4794	8.3266	24.9258	0.5701	0.6299	-0.0597	skewed:CAST	Autosomes	.
A930024E05Rik	ENSMUSG00000056735.8	lncRNA	chr5_123100000	435.083	466.13	-0.0984	31.906	33.2343	0.9459	0.9351	0.0107	biallelic	Autosomes	.
A930029G22Rik	ENSMUSG00000096988.3	lncRNA	chr17_69650000	18.9245	19.3398	-0.0248	0.1972	0.1959	0.2515	0.324	-0.0725	biallelic	Autosomes	.
A930033H14Rik	ENSMUSG00000090622.2	lncRNA	chr10_69000000	65.6958	97.5658	-0.5369	16.742	24.1739	0.6524	0.8214	-0.169	biallelic	Autosomes	.
A930037H05Rik	ENSMUSG00000109408.3	lncRNA	chr11_119350000	95.8539	86.221	0.1448	1.9029	1.6641	0.9082	0.8455	0.0627	biallelic	Autosomes	.
A930041C12Rik	ENSMUSG00000085900.3	lncRNA	chr5_107800000	57.1571	28.1876	0.9053	0.8389	0.4022	0.5202	0.5316	-0.0114	biallelic	Autosomes	.
AA386476	ENSMUSG00000074357.4	lncRNA	chr8_48100000	47.3378	28.2405	0.6549	4.0865	2.3703	0.7772	0.638	0.1392	biallelic	Autosomes	.
AA387883	ENSMUSG00000117896.3	lncRNA	chr19_52900000	8.35779	298.126	-4.5042	0.3829	13.2776	0.4297	0.6547	-0.225	mono:CAST	Autosomes	.
AA388235	ENSMUSG00000118084.3	lncRNA	chr17_34200000	208.022	0	5.4129	36.6834	0	0.7963	0.9876	-0.1912	mono:B6	Autosomes	.
AA465934	ENSMUSG00000093483.4	lncRNA	chr11_83150000	91.6524	170.426	-0.86	22.6969	41.0334	0.8406	0.7574	0.0832	biallelic	Autosomes	.
AA467197	ENSMUSG00000033213.17	protein_coding	chr2_122450000	20.2247	35.2767	-0.6751	4.089	6.9342	0.6698	0.6605	0.0093	biallelic	Autosomes	.
AA543186	ENSMUSG00000124529.1	lncRNA	chr2_25200000	36.9738	15.9441	1.0029	6.1036	2.559	0.9819	0.9986	-0.0167	skewed:B6	Autosomes	.
AA986860	ENSMUSG00000042510.8	protein_coding	chr1_130650000	88.2435	62.4969	0.4662	5.9323	4.0849	0.5925	0.6535	-0.061	biallelic	Autosomes	.
AB010352	ENSMUSG00000121596.1	protein_coding	chr5_110000000	76.5988	49.2472	0.589	3.8383	2.3993	0.3184	0.2568	0.0616	biallelic	Autosomes	.
AI182371	ENSMUSG00000035875.16	protein_coding	chr2_34950000	23.787	13.2638	0.6564	1.0275	0.557	0.8572	0.9083	-0.0511	biallelic	Autosomes	.
AI197445	ENSMUSG00000114780.4	lncRNA	chr13_107600000	22.8368	0.616757	2.3092	0.9849	0.0259	0.736	0.6429	0.0931	mono:B6	Autosomes	.
AI480526	ENSMUSG00000090086.10	lncRNA	chr5_123250000	328.643	317.824	0.0476	28.6413	26.9299	0.858	0.933	-0.075	biallelic	Autosomes	.
AI504432	ENSMUSG00000056145.7	lncRNA	chr3_106950000	39.7471	32.9684	0.237	2.1955	1.7705	0.43	0.3151	0.1148	biallelic	Autosomes	.
AI506816	ENSMUSG00000105987.7	lncRNA	chr5_23900000	6304.86	45.5925	6.9625	372.383	2.6181	0.8819	0.9913	-0.1093	mono:B6	Autosomes	.
AI597479	ENSMUSG00000010290.8	protein_coding	chr1_43150000	842.722	1003.95	-0.2512	41.5641	48.142	0.8797	0.8185	0.0612	biallelic	Autosomes	.
AI837181	ENSMUSG00000047423.11	protein_coding	chr19_5450000	430.327	415.929	0.0485	168.669	158.502	0.9589	0.9997	-0.0408	biallelic	Autosomes	.
AI839979	ENSMUSG00000107355.4	lncRNA	chr5_31700000	3.09803	6.97464	-0.5643	0.0486	0.1063	0.9634	0.959	0.0043	biallelic	Autosomes	.
AI849053	ENSMUSG00000097280.3	lncRNA	chr3_88100000	20.386	27.236	-0.3446	2.6733	3.4725	0.9516	0.938	0.0136	biallelic	Autosomes	.
AI854703	ENSMUSG00000053297.15	protein_coding	chr6_48600000	95.9149	86.7478	0.1374	11.775	10.3541	0.9223	0.9239	-0.0016	biallelic	Autosomes	.
AI987944	ENSMUSG00000056383.11	protein_coding	chr7_41000000	882.078	481.283	0.8673	36.6592	19.4471	0.496	0.3437	0.1523	biallelic	Autosomes	.
AK157302	ENSMUSG00000078139.4	protein_coding	chr13_21650000	7.69097	459.897	-5.195	3.4002	197.677	0.6633	0.4479	0.2154	mono:CAST	Autosomes	.
AU020206	ENSMUSG00000097415.5	lncRNA	chr7_75400000	4.11497	2595.03	-8.1561	0.0831	50.9211	0.8796	0.829	0.0505	mono:CAST	Autosomes	.
AU022252	ENSMUSG00000078584.10	protein_coding	chr4_119050000	1137.71	727.807	0.641	33.1901	20.643	0.6621	0.6738	-0.0117	biallelic	Autosomes	.
AU022754	ENSMUSG00000097209.4	lncRNA	chr15_85450000	36.7987	20.0023	0.7414	1.5194	0.803	0.9975	0.9687	0.0288	biallelic	Autosomes	.
AU040320	ENSMUSG00000028830.15	protein_coding	chr4_126650000	2147.65	1872.7	0.1971	15.6688	13.2837	0.7731	0.9553	-0.1822	biallelic	Autosomes	.
AV039307	ENSMUSG00000087519.11	lncRNA	chr2_120650000	54.3424	37.7209	0.4741	0.7068	0.477	0.9983	0.812	0.1862	biallelic	Autosomes	.
AV099323	ENSMUSG00000087377.4	lncRNA	chr2_132100000	77.8126	25.4615	1.4429	7.7038	2.4509	0.8327	0.6413	0.1914	skewed:B6	Autosomes	.
AW011738	ENSMUSG00000078349.6	lncRNA	chr4_156250000	762.944	558.618	0.4463	88.0437	62.6758	0.9107	0.9975	-0.0869	biallelic	Autosomes	.
AW046200	ENSMUSG00000110419.4	lncRNA	chr8_58150000	30.9724	21.9742	0.4153	0.2204	0.152	0.6283	0.4084	0.2199	biallelic	Autosomes	.
AW047730	ENSMUSG00000097428.3	lncRNA	chr3_88100000	903.787	923.041	-0.0302	260.107	258.277	0.9516	0.938	0.0136	biallelic	Autosomes	.
AW554918	ENSMUSG00000033632.18	protein_coding	chr18_25350000	294.422	310.613	-0.076	0.839	0.8606	0.3496	0.5681	-0.2184	biallelic	Autosomes	.
Aaas	ENSMUSG00000036678.9	protein_coding	chr15_102200000	16.8906	34.0274	-0.8342	1.147	2.2466	0.9793	0.9658	0.0134	biallelic	Autosomes	.
Aacs	ENSMUSG00000029482.5	protein_coding	chr5_125550000	2037	1769.17	0.2028	41.6327	35.1555	0.8776	0.8203	0.0573	biallelic	Autosomes	.
Aagab	ENSMUSG00000037257.9	protein_coding	chr9_63500000	1190.41	1278.83	-0.1029	24.1374	25.2106	0.7361	0.9264	-0.1904	biallelic	Autosomes	.
Aak1	ENSMUSG00000057230.15	protein_coding	chr6_86850000	2424.95	2444.25	-0.0114	13.4124	13.1441	0.9777	0.9186	0.0591	biallelic	Autosomes	.
Aamdc	ENSMUSG00000035642.17	protein_coding	chr7_97200000	2026.08	1610.6	0.3302	59.0575	45.6441	0.9487	0.9265	0.0222	biallelic	Autosomes	.
Aamp	ENSMUSG00000006299.14	protein_coding	chr1_74300000	2380.26	3519.62	-0.5633	413.144	593.953	0.875	0.991	-0.116	biallelic	Autosomes	.
Aar2	ENSMUSG00000027628.11	protein_coding	chr2_156400000	147.501	175.45	-0.2428	5.863	6.7804	0.8998	0.9981	-0.0983	biallelic	Autosomes	.
Aard	ENSMUSG00000068522.5	protein_coding	chr15_51900000	1078.26	1020.83	0.0786	163.257	150.272	0.2966	0.1776	0.119	biallelic	Autosomes	.
Aars1	ENSMUSG00000031960.15	protein_coding	chr8_111750000	3376.85	3946.97	-0.2248	117.081	133.051	0.8645	0.7544	0.1101	biallelic	Autosomes	.
Aars2	ENSMUSG00000023938.9	protein_coding	chr17_45800000	594.807	863.282	-0.5337	36.1146	50.961	0.8396	0.8409	-0.0013	biallelic	Autosomes	.
Aasdh	ENSMUSG00000055923.17	protein_coding	chr5_77000000	680.24	801.26	-0.2346	18.1544	20.7908	0.8505	0.946	-0.0955	biallelic	Autosomes	.
Aasdhppt	ENSMUSG00000025894.12	protein_coding	chr9_4250000	289.757	293.529	-0.0183	16.7827	16.5295	0.2394	0.5367	-0.2972	biallelic	Autosomes	.
Aass	ENSMUSG00000029695.14	protein_coding	chr6_23100000	38.4549	105.531	-1.3469	0.5376	1.4344	0.4111	0.6401	-0.229	skewed:CAST	Autosomes	.
Aatf	ENSMUSG00000018697.15	protein_coding	chr11_84350000	727.125	734.178	-0.0138	6.818	6.6931	0.6769	0.8449	-0.168	biallelic	Autosomes	.
Aatk	ENSMUSG00000025375.16	protein_coding	chr11_119850000	355.854	456.42	-0.3547	7.5909	9.466	0.9848	0.8865	0.0983	biallelic	Autosomes	.
Abat	ENSMUSG00000057880.13	protein_coding	chr16_8300000	11717.2	9734.07	0.2674	92.1166	74.4024	0.9634	0.8126	0.1508	biallelic	Autosomes	.
Abca1	ENSMUSG00000015243.5	protein_coding	chr4_53050000	973.273	1001.54	-0.0411	6.4088	6.4119	0.6705	0.9109	-0.2403	biallelic	Autosomes	.
Abca17	ENSMUSG00000035435.18	protein_coding	chr17_24550000	26.9794	9.01523	1.1901	0.2642	0.0858	0.8579	0.9907	-0.1328	skewed:B6	Autosomes	.
Abca2	ENSMUSG00000026944.19	protein_coding	chr2_25300000	973.696	1143.48	-0.2308	41.7296	47.6463	0.992	0.9637	0.0283	biallelic	Autosomes	.
Abca3	ENSMUSG00000024130.17	protein_coding	chr17_24550000	2043.71	1992.89	0.0362	29.8272	28.2785	0.8579	0.9907	-0.1328	biallelic	Autosomes	.
Abca4	ENSMUSG00000028125.15	protein_coding	chr3_121950000	12.3311	5.10147	0.7788	0.0773	0.0311	0.8107	0.6735	0.1373	skewed:B6	Autosomes	.
Abca5	ENSMUSG00000018800.15	protein_coding	chr11_110200000	315.668	370.153	-0.2264	3.9265	4.4765	0.5118	0.374	0.1378	biallelic	Autosomes	.
Abca6	ENSMUSG00000044749.14	protein_coding	chr11_110100000	16.1432	2.42122	1.5105	0.1831	0.0267	0.5334	0.3691	0.1643	skewed:B6	Autosomes	.
Abca7	ENSMUSG00000035722.16	protein_coding	chr10_79850000	262.467	260.474	0.0108	11.696	11.2851	0.9889	0.8472	0.1417	biallelic	Autosomes	.
Abca8a	ENSMUSG00000041828.17	protein_coding	chr11_109950000	156.182	57.0061	1.3782	1.8876	0.6698	0.5087	0.3945	0.1142	skewed:B6	Autosomes	.
Abca8b	ENSMUSG00000020620.15	protein_coding	chr11_109800000	21.8199	66.7913	-1.4205	0.2914	0.8673	0.5903	0.4845	0.1058	skewed:CAST	Autosomes	.
Abca9	ENSMUSG00000041797.8	protein_coding	chr11_110050000	40.0972	5.45919	2.1083	0.5054	0.0669	0.5997	0.4497	0.15	skewed:B6	Autosomes	.
Abcb10	ENSMUSG00000031974.9	protein_coding	chr8_124700000	703.346	464.343	0.5938	19.5007	12.517	0.9949	0.8752	0.1197	biallelic	Autosomes	.
Abcb1b	ENSMUSG00000028970.10	protein_coding	chr5_8850000	245.379	159.649	0.6047	3.0602	1.9358	0.7278	0.3917	0.3361	biallelic	Autosomes	.
Abcb4	ENSMUSG00000042476.13	protein_coding	chr5_8900000	107.984	204.196	-0.8887	1.4013	2.5763	0.5671	0.3745	0.1926	biallelic	Autosomes	.
Abcb7	ENSMUSG00000031333.8	protein_coding	chrX_103300000	896.928	14.6418	5.521	5.7247	0.0909	0.4834	0.8291	-0.3457	mono:B6	X	.
Abcb8	ENSMUSG00000028973.19	protein_coding	chr5_24550000	1086.61	966.117	0.1687	56.3593	48.7191	0.9886	0.9699	0.0187	biallelic	Autosomes	.
Abcb9	ENSMUSG00000029408.14	protein_coding	chr5_124200000	43.9841	86.3443	-0.899	1.0912	2.0827	0.8862	0.9829	-0.0967	biallelic	Autosomes	.
Abcc1	ENSMUSG00000023088.18	protein_coding	chr16_14200000	569.165	604.932	-0.0872	4.2379	4.3792	0.5124	0.5702	-0.0578	biallelic	Autosomes	.
Abcc10	ENSMUSG00000032842.14	protein_coding	chr17_46600000	486.536	423.809	0.197	16.4589	13.9391	0.8136	0.9397	-0.1261	biallelic	Autosomes	.
Abcc12	ENSMUSG00000036872.17	protein_coding	chr8_87300000	69.2856	87.5919	-0.3178	0.5985	0.7356	0.8124	0.6835	0.1289	biallelic	Autosomes	.
Abcc4	ENSMUSG00000032849.15	protein_coding	chr14_118800000	958.37	632.924	0.5947	3.645	2.3404	0.7054	0.958	-0.2526	biallelic	Autosomes	.
Abcc5	ENSMUSG00000022822.18	protein_coding	chr16_20200000	1873.21	1876.05	-0.0022	16.7472	16.3072	0.7617	0.6649	0.0968	biallelic	Autosomes	.
Abcc8	ENSMUSG00000040136.11	protein_coding	chr7_45750000	2.03388	11.1774	-1.2016	0.0229	0.1224	0.9469	0.8621	0.0848	skewed:CAST	Autosomes	.
Abcd1	ENSMUSG00000031378.15	protein_coding	chrX_72750000	390.094	6.47948	5.1051	15.1178	0.2441	0.9249	0.9244	0.0005	mono:B6	X	.
Abcd2	ENSMUSG00000055782.10	protein_coding	chr15_91000000	183.991	231.293	-0.3223	3.4058	4.1626	0.4961	0.439	0.0571	biallelic	Autosomes	.
Abcd3	ENSMUSG00000028127.11	protein_coding	chr3_121550000	6972.19	6965.08	0.0015	104.858	101.845	0.8805	0.7576	0.1229	biallelic	Autosomes	.
Abcd4	ENSMUSG00000021240.7	protein_coding	chr12_84600000	821.048	683.998	0.2617	43.7655	35.4484	0.9689	0.6986	0.2703	biallelic	Autosomes	.
Abce1	ENSMUSG00000058355.9	protein_coding	chr8_80400000	1621.71	1562.36	0.0536	48.7552	45.6677	0.9133	0.8156	0.0977	biallelic	Autosomes	.
Abcf2	ENSMUSG00000028953.11	protein_coding	chr5_24750000	900.499	1067.83	-0.2446	63.1546	72.8121	0.9463	0.9499	-0.0036	biallelic	Autosomes	.
Abcf3	ENSMUSG00000003234.17	protein_coding	chr16_20350000	326.221	368.477	-0.1732	21.6636	23.7908	0.9806	0.9078	0.0728	biallelic	Autosomes	.
Abcg1	ENSMUSG00000024030.8	protein_coding	chr17_31250000	13.712	36.3199	-1.1429	0.1933	0.4977	0.7455	0.4286	0.3169	skewed:CAST	Autosomes	.
Abcg2	ENSMUSG00000029802.14	protein_coding	chr6_58650000	388.231	158.965	1.262	2.9694	1.1821	0.3096	0.424	-0.1144	skewed:B6	Autosomes	.
Abcg4	ENSMUSG00000032131.17	protein_coding	chr9_44150000	127.729	131.327	-0.0386	7.0389	7.0364	0.8943	0.9578	-0.0635	biallelic	Autosomes	.
Abhd1	ENSMUSG00000006638.17	protein_coding	chr5_31100000	84.5477	305.288	-1.7929	14.3041	50.2168	0.9085	0.9149	-0.0065	skewed:CAST	Autosomes	.
Abhd10	ENSMUSG00000033157.18	protein_coding	chr16_45550000	7.34085	5.29178	0.2619	0.4717	0.3306	0.9207	0.8624	0.0583	biallelic	Autosomes	.
Abhd11	ENSMUSG00000040532.15	protein_coding	chr5_135000000	730.524	627.146	0.2185	205.444	171.477	0.8606	0.8998	-0.0392	biallelic	Autosomes	.
Abhd12	ENSMUSG00000032046.16	protein_coding	chr2_150700000	1637.02	1667.01	-0.0261	19.2631	19.0716	0.7039	0.4658	0.238	biallelic	Autosomes	.
Abhd13	ENSMUSG00000040396.13	protein_coding	chr8_10000000	1265.91	1233.65	0.0371	74.4887	70.5765	0.6434	0.6175	0.0259	biallelic	Autosomes	.
Abhd14a	ENSMUSG00000042210.19	protein_coding	chr9_106300000	675.848	671.912	0.0084	75.3637	72.8458	0.8837	0.8913	-0.0075	biallelic	Autosomes	.
Abhd14b	ENSMUSG00000042073.16	protein_coding	chr9_106300000	62.1081	18.2208	1.5311	9.6635	2.7563	0.8837	0.8913	-0.0075	skewed:B6	Autosomes	.
Abhd15	ENSMUSG00000000686.12	protein_coding	chr11_77400000	193.588	160.368	0.2641	7.0076	5.6439	0.9992	0.9925	0.0067	biallelic	Autosomes	.
Abhd17a	ENSMUSG00000003346.15	protein_coding	chr10_80400000	820.46	905.213	-0.141	104.309	111.891	0.9862	0.8178	0.1684	biallelic	Autosomes	.
Abhd17b	ENSMUSG00000047368.5	protein_coding	chr19_21600000	1328.39	1478.99	-0.1544	34.8001	37.6703	0.8254	0.6654	0.1601	biallelic	Autosomes	.
Abhd17c	ENSMUSG00000038459.11	protein_coding	chr7_83750000	959.795	943.965	0.0239	19.1826	18.3427	0.7981	0.7044	0.0937	biallelic	Autosomes	.
Abhd18	ENSMUSG00000037818.18	protein_coding	chr3_40800000	372.652	412.301	-0.144	3.475	3.7381	0.8134	0.6396	0.1738	biallelic	Autosomes	.
Abhd2	ENSMUSG00000039202.13	protein_coding	chr7_79000000	1981.71	3459.78	-0.8024	18.2512	30.9799	0.714	0.9617	-0.2478	biallelic	Autosomes	.
Abhd3	ENSMUSG00000002475.17	protein_coding	chr18_10600000	63.4752	187.082	-1.4881	0.8343	2.3908	0.6166	0.785	-0.1684	skewed:CAST	Autosomes	.
Abhd4	ENSMUSG00000040997.15	protein_coding	chr14_54500000	11425.4	14256.3	-0.3192	590.51	716.376	0.9062	0.6679	0.2383	biallelic	Autosomes	.
Abhd5	ENSMUSG00000032540.17	protein_coding	chr9_122200000	725.172	663.938	0.1264	20.6079	18.3442	0.6978	0.5255	0.1723	biallelic	Autosomes	.
Abhd6	ENSMUSG00000025277.15	protein_coding	chr14_14450000	155.603	133.102	0.2178	2.4561	2.0426	0.6934	0.92	-0.2266	biallelic	Autosomes	.
Abhd8	ENSMUSG00000007950.10	protein_coding	chr8_71900000	548.627	625.658	-0.1879	67.1102	74.4093	0.8793	0.7246	0.1547	biallelic	Autosomes	.
Abi1	ENSMUSG00000058835.15	protein_coding	chr2_22850000	1082.16	1073.34	0.0118	9.1846	8.8569	0.6727	0.887	-0.2143	biallelic	Autosomes	.
Abi2	ENSMUSG00000026782.16	protein_coding	chr1_60400000	895.114	1007.18	-0.1693	10.6373	11.6369	0.7213	0.8513	-0.13	biallelic	Autosomes	.
Abitram	ENSMUSG00000038827.12	protein_coding	chr4_56800000	802.101	1031.3	-0.3606	93.9784	117.48	0.7912	0.8918	-0.1006	biallelic	Autosomes	.
Abl2	ENSMUSG00000026596.14	protein_coding	chr1_156400000	1780.05	2339.09	-0.3931	16.6697	21.2972	0.9733	0.7393	0.234	biallelic	Autosomes	.
Ablim1	ENSMUSG00000025085.17	protein_coding	chr19_57150000	1173.58	894.28	0.3902	3.5357	2.6195	0.8729	0.7487	0.1242	biallelic	Autosomes	.
Ablim2	ENSMUSG00000029095.18	protein_coding	chr5_35900000	178.5	64.0811	1.4094	1.194	0.4168	0.9855	0.8954	0.0901	skewed:B6	Autosomes	.
Abr	ENSMUSG00000017631.20	protein_coding	chr11_76500000	866.715	589.261	0.5528	3.5626	2.355	0.9929	0.8801	0.1128	biallelic	Autosomes	.
Abracl	ENSMUSG00000078453.4	protein_coding	chr10_17850000	567.139	420.289	0.4279	40.086	28.8821	0.4588	0.5681	-0.1093	biallelic	Autosomes	.
Abraxas1	ENSMUSG00000035234.19	protein_coding	chr5_100950000	300.302	293.399	0.033	16.186	15.3751	0.6752	0.831	-0.1558	biallelic	Autosomes	.
Abraxas2	ENSMUSG00000030965.20	protein_coding	chr7_132450000	731.73	700.401	0.0627	24.0316	22.3644	0.8888	0.8001	0.0887	biallelic	Autosomes	.
Abtb1	ENSMUSG00000030083.12	protein_coding	chr6_88800000	555.134	519.456	0.0949	77.7508	70.7351	0.9386	0.9502	-0.0117	biallelic	Autosomes	.
Abtb2	ENSMUSG00000032724.6	protein_coding	chr2_103400000	605.278	541.911	0.1582	3.3829	2.9447	0.8914	0.7852	0.1062	biallelic	Autosomes	.
Abtb3	ENSMUSG00000020042.16	protein_coding	chr10_85450000	129.385	103.497	0.3087	0.4022	0.3128	0.6432	0.8412	-0.1981	biallelic	Autosomes	.
Acaa1b	ENSMUSG00000010651.5	protein_coding	chr9_118950000	15.443	0	2.0316	1.4475	0	0.9998	0.7746	0.2251	mono:B6	Autosomes	.
Acaa2	ENSMUSG00000036880.11	protein_coding	chr18_74900000	2490.05	4633.03	-0.8944	78.3723	141.775	0.797	0.818	-0.021	biallelic	Autosomes	.
Acaca	ENSMUSG00000020532.19	protein_coding	chr11_84000000	1587.87	1395.19	0.186	4.9634	4.2401	0.9556	0.7886	0.167	biallelic	Autosomes	.
Acacb	ENSMUSG00000042010.17	protein_coding	chr5_114300000	55.0484	69.2795	-0.3068	0.449	0.5494	0.7701	0.6628	0.1073	biallelic	Autosomes	.
Acad10	ENSMUSG00000029456.13	protein_coding	chr5_121750000	222.682	393.169	-0.8064	4.7942	8.2298	0.9488	0.9178	0.0309	biallelic	Autosomes	.
Acad11	ENSMUSG00000090150.11	protein_coding	chr9_103900000	1231.67	1282.74	-0.0584	16.2725	16.4771	0.69	0.8674	-0.1775	biallelic	Autosomes	.
Acad12	ENSMUSG00000042647.14	protein_coding	chr5_121750000	457.401	1601.67	-1.7969	17.5454	59.7337	0.9488	0.9178	0.0309	skewed:CAST	Autosomes	.
Acad8	ENSMUSG00000031969.17	protein_coding	chr9_26900000	26.3932	295.556	-3.2591	0.8823	9.6062	0.907	0.7824	0.1245	mono:CAST	Autosomes	.
Acad9	ENSMUSG00000027710.15	protein_coding	chr3_36100000	653.97	877.444	-0.4213	20.6882	26.9875	0.6169	0.7993	-0.1823	biallelic	Autosomes	.
Acadl	ENSMUSG00000026003.6	protein_coding	chr1_66900000	9151.6	12047.3	-0.3964	239.85	306.98	0.694	0.6244	0.0697	biallelic	Autosomes	.
Acadm	ENSMUSG00000062908.13	protein_coding	chr3_153650000	3572.18	2645.83	0.4324	136.336	98.1792	0.5061	0.2931	0.213	biallelic	Autosomes	.
Acads	ENSMUSG00000029545.14	protein_coding	chr5_115250000	2125.48	1988.41	0.0959	199.732	181.667	0.9999	0.9291	0.0708	biallelic	Autosomes	.
Acadsb	ENSMUSG00000030861.16	protein_coding	chr7_131000000	2678.04	2349.15	0.1887	59.3783	50.6408	0.7282	0.4968	0.2314	biallelic	Autosomes	.
Acadvl	ENSMUSG00000018574.15	protein_coding	chr11_69900000	819.418	814.187	0.0092	133.25	128.725	0.8961	0.7802	0.1159	biallelic	Autosomes	.
Acan	ENSMUSG00000030607.8	protein_coding	chr7_78700000	7.91325	7.35527	0.0637	0.1092	0.0987	0.9434	0.7064	0.237	biallelic	Autosomes	.
Acap1	ENSMUSG00000001588.13	protein_coding	chr11_69750000	20.5749	25.2641	-0.2429	1.2519	1.4946	0.9453	0.9673	-0.022	biallelic	Autosomes	.
Acap3	ENSMUSG00000029033.17	protein_coding	chr4_155950000	3372.67	3430.88	-0.0247	185.837	183.799	0.8377	0.9219	-0.0842	biallelic	Autosomes	.
Acat1	ENSMUSG00000032047.6	protein_coding	chr9_53500000	2809.72	2615.17	0.1033	79.9963	72.3912	0.8362	0.9734	-0.1372	biallelic	Autosomes	.
Acbd3	ENSMUSG00000026499.6	protein_coding	chr1_180550000	249.502	325.172	-0.3755	7.5322	9.5442	0.9714	0.9722	-0.0008	biallelic	Autosomes	.
Acbd4	ENSMUSG00000056938.18	protein_coding	chr11_102950000	64.7675	131.709	-0.9705	4.3284	8.558	0.9403	0.9991	-0.0589	biallelic	Autosomes	.
Acbd5	ENSMUSG00000026781.18	protein_coding	chr2_22950000	1695.37	1642.54	0.0455	30.4135	28.648	0.6733	0.4956	0.1777	biallelic	Autosomes	.
Acbd6	ENSMUSG00000033701.14	protein_coding	chr1_155400000	939.22	1143.59	-0.2827	5.9941	7.0959	0.6125	0.749	-0.1365	biallelic	Autosomes	.
Acbd7	ENSMUSG00000026644.8	protein_coding	chr2_3300000	15.0318	18.1062	-0.206	2.6486	3.1017	0.7073	0.5666	0.1408	biallelic	Autosomes	.
Accs	ENSMUSG00000040272.15	protein_coding	chr2_93650000	774.475	405.686	0.9245	39.9624	20.3523	0.9647	0.9547	0.01	biallelic	Autosomes	.
Acd	ENSMUSG00000038000.11	protein_coding	chr8_106400000	753.555	746.927	0.0127	122.212	117.776	0.9381	0.9811	-0.043	biallelic	Autosomes	.
Ace	ENSMUSG00000020681.15	protein_coding	chr11_105850000	29.0998	93.9252	-1.5366	1.1235	3.5258	0.8077	0.8166	-0.0089	skewed:CAST	Autosomes	.
Acer2	ENSMUSG00000038007.15	protein_coding	chr4_86850000	22.1504	51.1133	-1.0474	0.3116	0.6992	0.5523	0.7049	-0.1526	biallelic	Autosomes	.
Acer3	ENSMUSG00000030760.15	protein_coding	chr7_97850000	624.344	505.123	0.303	4.6228	3.6363	0.716	0.8362	-0.1202	biallelic	Autosomes	.
Ache	ENSMUSG00000023328.15	protein_coding	chr5_137250000	25.4097	15.6392	0.5591	3.1096	1.8608	0.9765	0.9497	0.0268	biallelic	Autosomes	.
Acin1	ENSMUSG00000022185.20	protein_coding	chr14_54900000	4952.28	4946.25	0.0018	94.0403	91.3197	0.9925	0.9774	0.0151	biallelic	Autosomes	.
Ackr1	ENSMUSG00000037872.6	protein_coding	chr1_173150000	90.3072	56.0333	0.643	41.1882	24.8471	0.3599	0.2374	0.1225	biallelic	Autosomes	.
Ackr4	ENSMUSG00000079355.6	protein_coding	chr9_103950000	407.658	284.928	0.5093	8.102	5.5057	0.7577	0.8525	-0.0949	biallelic	Autosomes	.
Acly	ENSMUSG00000020917.18	protein_coding	chr11_100400000	7264.31	8252.6	-0.1839	119.576	132.075	0.9966	0.8849	0.1117	biallelic	Autosomes	.
Aco1	ENSMUSG00000028405.10	protein_coding	chr4_40100000	3946.09	3326.07	0.2463	60.7121	49.753	0.5014	0.6899	-0.1885	biallelic	Autosomes	.
Aco2	ENSMUSG00000022477.14	protein_coding	chr15_81750000	6344.66	6950.89	-0.1316	125.956	134.162	0.8899	0.9046	-0.0147	biallelic	Autosomes	.
Acot1	ENSMUSG00000072949.7	protein_coding	chr12_84050000	3688.59	6113.69	-0.7282	353.098	569.005	0.9195	0.9858	-0.0663	biallelic	Autosomes	.
Acot11	ENSMUSG00000034853.17	protein_coding	chr4_106600000	798.644	1308.31	-0.7086	11.2332	17.8913	0.9113	0.8761	0.0352	biallelic	Autosomes	.
Acot2	ENSMUSG00000021226.8	protein_coding	chr12_84000000	586.819	599.368	-0.0303	82.9816	82.4043	0.7566	0.7526	0.0039	biallelic	Autosomes	.
Acot6	ENSMUSG00000043487.5	protein_coding	chr12_84150000	15.8933	106.794	-2.4197	1.2634	8.2536	0.8306	0.9678	-0.1372	skewed:CAST	Autosomes	.
Acot7	ENSMUSG00000028937.15	protein_coding	chr4_152350000	470.249	243.05	0.9381	4.2657	2.1436	0.8758	0.8195	0.0563	biallelic	Autosomes	.
Acot8	ENSMUSG00000017307.17	protein_coding	chr2_164600000	275.457	296.334	-0.1036	19.3266	20.2145	0.9275	0.9486	-0.021	biallelic	Autosomes	.
Acot9	ENSMUSG00000025287.16	protein_coding	chrX_154050000	241.53	0	5.6237	5.8316	0	0.2297	0.3682	-0.1385	mono:B6	X	.
Acox1	ENSMUSG00000020777.17	protein_coding	chr11_116050000	4681.22	3502.23	0.4181	146.546	106.595	0.9919	0.859	0.1329	biallelic	Autosomes	.
Acox3	ENSMUSG00000029098.18	protein_coding	chr5_35700000	1049.29	986.689	0.0883	27.6077	25.2401	0.8814	0.9812	-0.0999	biallelic	Autosomes	.
Acp1	ENSMUSG00000044573.17	protein_coding	chr12_30900000	1418.33	666.888	1.083	66.0237	30.1825	0.5878	0.4656	0.1221	biallelic	Autosomes	.
Acp2	ENSMUSG00000002103.17	protein_coding	chr2_91000000	1072.08	1136.04	-0.0832	81.2831	83.7431	0.9201	0.8851	0.0351	biallelic	Autosomes	.
Acrbp	ENSMUSG00000072770.10	protein_coding	chr6_125000000	329.351	326.559	0.0121	20.6215	19.8793	0.8673	0.7916	0.0756	biallelic	Autosomes	.
Acsbg1	ENSMUSG00000032281.12	protein_coding	chr9_54550000	6706.52	5770.68	0.2166	100.04	83.6914	0.7519	0.887	-0.1351	biallelic	Autosomes	.
Acsf2	ENSMUSG00000076435.4	protein_coding	chr11_94450000	1407.4	1043.53	0.4298	26.7261	19.2664	0.9544	0.9486	0.0058	biallelic	Autosomes	.
Acsl1	ENSMUSG00000018796.14	protein_coding	chr8_46900000	126.557	121.26	0.0593	1.6549	1.5416	0.7143	0.8325	-0.1182	biallelic	Autosomes	.
Acsl3	ENSMUSG00000032883.16	protein_coding	chr1_78650000	1515.79	2219.34	-0.5486	25.8153	36.7487	0.7664	0.8647	-0.0983	biallelic	Autosomes	.
Acsl4	ENSMUSG00000031278.13	protein_coding	chrX_141100000	1201.8	98.283	3.5465	14.0845	1.1199	0.9187	0.4978	0.4208	mono:B6	X	.
Acsl5	ENSMUSG00000024981.7	protein_coding	chr19_55250000	164.84	368.388	-1.1365	3.061	6.651	0.8554	0.7879	0.0675	biallelic	Autosomes	.
Acsl6	ENSMUSG00000020333.18	protein_coding	chr11_54250000	577.077	458.943	0.3273	8.0482	6.2231	0.6463	0.9415	-0.2952	biallelic	Autosomes	.
Acss1	ENSMUSG00000027452.12	protein_coding	chr2_150500000	1996.25	564.93	1.812	33.6762	9.2658	0.5974	0.4617	0.1356	skewed:B6	Autosomes	.
Acss2	ENSMUSG00000027605.19	protein_coding	chr2_155350000	169.282	99.8125	0.7336	2.1234	1.2173	0.8906	0.7907	0.0999	biallelic	Autosomes	.
Acss3	ENSMUSG00000035948.14	protein_coding	chr10_106950000	297.103	533.062	-0.8327	1.3283	2.3172	0.0979	0.3541	-0.2562	biallelic	Autosomes	.
Acta2	ENSMUSG00000035783.10	protein_coding	chr19_34200000	10.1222	33.3419	-1.3423	0.5935	1.9006	0.7226	0.5043	0.2184	skewed:CAST	Autosomes	.
Actb	ENSMUSG00000029580.15	protein_coding	chr5_142850000	388.122	464.501	-0.2562	90.6738	105.507	0.8816	0.9278	-0.0463	biallelic	Autosomes	.
Actc1	ENSMUSG00000068614.8	protein_coding	chr2_113850000	251.605	47.2083	2.2972	34.137	6.2274	0.6282	0.5122	0.116	skewed:B6	Autosomes	.
Actg1	ENSMUSG00000062825.16	protein_coding	chr11_120200000	3997.63	5781.99	-0.5319	1191.65	1675.73	0.9836	0.9855	-0.0019	biallelic	Autosomes	.
Actl6a	ENSMUSG00000027671.15	protein_coding	chr3_32750000	1764.19	1724.02	0.0331	72.5433	68.9241	0.7621	0.673	0.0891	biallelic	Autosomes	.
Actmap	ENSMUSG00000078786.10	protein_coding	chr7_26850000	227.653	247.292	-0.1169	13.4356	14.1896	0.7619	0.8814	-0.1195	biallelic	Autosomes	.
Actn1	ENSMUSG00000015143.16	protein_coding	chr12_80250000	1408.77	1138.41	0.3062	12.9026	10.1371	0.862	0.9826	-0.1206	biallelic	Autosomes	.
Actn2	ENSMUSG00000052374.17	protein_coding	chr13_12250000	34.69	34.7658	-0.0028	0.4135	0.4029	0.5881	0.4681	0.12	biallelic	Autosomes	.
Actn3	ENSMUSG00000006457.5	protein_coding	chr19_4900000	7.16579	14.1396	-0.6537	0.3649	0.7001	0.974	0.835	0.139	biallelic	Autosomes	.
Actn4	ENSMUSG00000054808.16	protein_coding	chr7_28600000	3771.64	3792.56	-0.008	46.4087	45.3712	0.9358	0.9076	0.0282	biallelic	Autosomes	.
Actr10	ENSMUSG00000021076.7	protein_coding	chr12_71000000	1606.96	2299.12	-0.5154	50.8603	70.7482	0.9156	0.8897	0.026	biallelic	Autosomes	.
Actr1a	ENSMUSG00000025228.6	protein_coding	chr19_46350000	5685.77	5918.97	-0.0579	255.255	258.351	0.9194	0.9964	-0.077	biallelic	Autosomes	.
Actr1b	ENSMUSG00000037351.10	protein_coding	chr1_36700000	2324.1	3490.55	-0.5858	121.157	176.917	0.9952	0.8476	0.1475	biallelic	Autosomes	.
Actr2	ENSMUSG00000020152.8	protein_coding	chr11_20050000	2884.8	2612.85	0.1426	48.46	42.6739	0.8235	0.9522	-0.1288	biallelic	Autosomes	.
Actr3	ENSMUSG00000026341.17	protein_coding	chr1_125300000	2982.42	3168.54	-0.0872	59.2103	61.16	0.6761	0.6432	0.0329	biallelic	Autosomes	.
Actr3b	ENSMUSG00000056367.15	protein_coding	chr5_26000000	159.636	200.705	-0.3213	1.4964	1.8292	0.6309	0.7749	-0.144	biallelic	Autosomes	.
Actr5	ENSMUSG00000037761.17	protein_coding	chr2_158450000	424.615	337.114	0.3286	25.2033	19.4544	0.7199	0.8125	-0.0926	biallelic	Autosomes	.
Actr6	ENSMUSG00000019948.5	protein_coding	chr10_89550000	512.868	507.072	0.0162	21.4532	20.6222	0.6955	0.5456	0.15	biallelic	Autosomes	.
Actr8	ENSMUSG00000015971.6	protein_coding	chr14_29700000	643.154	811.33	-0.3328	19.516	23.936	0.8913	0.992	-0.1007	biallelic	Autosomes	.
Acvr1	ENSMUSG00000026836.16	protein_coding	chr2_58450000	452.115	452.556	-0.0014	2.1532	2.0955	0.7638	0.9725	-0.2087	biallelic	Autosomes	.
Acvr1b	ENSMUSG00000000532.12	protein_coding	chr15_101100000	48.2741	57.2122	-0.2238	1.0359	1.1937	0.8548	0.7905	0.0643	biallelic	Autosomes	.
Acvr2a	ENSMUSG00000052155.6	protein_coding	chr2_48700000	256.453	241.973	0.0822	2.4453	2.2432	0.7523	0.5693	0.183	biallelic	Autosomes	.
Acvr2b	ENSMUSG00000061393.15	protein_coding	chr9_119250000	23.5037	27.8598	-0.2052	0.6078	0.7004	0.7031	0.985	-0.2819	biallelic	Autosomes	.
Acy1	ENSMUSG00000023262.14	protein_coding	chr9_106300000	685.935	931.274	-0.4384	109.245	144.203	0.8837	0.8913	-0.0075	biallelic	Autosomes	.
Acy3	ENSMUSG00000024866.11	protein_coding	chr19_4000000	278.714	317.651	-0.1855	68.9407	76.3917	0.9821	0.7282	0.2539	biallelic	Autosomes	.
Acyp1	ENSMUSG00000008822.16	protein_coding	chr12_85300000	502.557	368.197	0.4436	26.6365	18.9737	0.8502	0.8311	0.0191	biallelic	Autosomes	.
Acyp2	ENSMUSG00000060923.6	protein_coding	chr11_30450000	721.083	240.118	1.5667	4.2691	1.3822	0.6195	0.3181	0.3014	skewed:B6	Autosomes	.
Ada	ENSMUSG00000017697.4	protein_coding	chr2_163550000	64.0592	64.7578	-0.0145	2.3023	2.2628	0.9737	0.9787	-0.005	biallelic	Autosomes	.
Adal	ENSMUSG00000027259.16	protein_coding	chr2_120950000	316.036	304.06	0.0548	16.532	15.4642	0.6612	0.9472	-0.286	biallelic	Autosomes	.
Adam10	ENSMUSG00000054693.15	protein_coding	chr9_70650000	1866.89	1709.91	0.1264	15.6782	13.9614	0.9734	0.8364	0.1371	biallelic	Autosomes	.
Adam12	ENSMUSG00000054555.12	protein_coding	chr7_133550000	3078.46	2800.17	0.1365	7.5001	6.6329	0.6251	0.9059	-0.2808	biallelic	Autosomes	.
Adam15	ENSMUSG00000028041.18	protein_coding	chr3_89200000	660.568	625.745	0.0775	49.0294	45.156	0.8996	0.9812	-0.0816	biallelic	Autosomes	.
Adam17	ENSMUSG00000052593.17	protein_coding	chr12_21400000	2610.09	2702.41	-0.05	44.2706	44.5645	0.9591	0.6839	0.2752	biallelic	Autosomes	.
Adam19	ENSMUSG00000011256.17	protein_coding	chr11_46000000	1182.91	599.24	0.9752	11.0086	5.422	0.7164	0.9116	-0.1952	biallelic	Autosomes	.
Adam22	ENSMUSG00000040537.18	protein_coding	chr5_8250000	752.491	576.138	0.3823	2.1627	1.6099	0.3317	0.0924	0.2393	biallelic	Autosomes	.
Adam23	ENSMUSG00000025964.16	protein_coding	chr1_63600000	50.8194	43.1642	0.2128	0.2873	0.2372	0.7718	0.6464	0.1255	biallelic	Autosomes	.
Adam32	ENSMUSG00000037437.19	protein_coding	chr8_25400000	12.3783	6.50239	0.5954	0.0934	0.0477	0.5059	0.6783	-0.1724	biallelic	Autosomes	.
Adam5	ENSMUSG00000031554.19	protein_coding	chr8_25200000	88.9852	39.9817	1.0631	0.7777	0.3397	0.3372	0.4815	-0.1443	biallelic	Autosomes	.
Adam8	ENSMUSG00000025473.17	protein_coding	chr7_139550000	120.438	86.954	0.448	7.5121	5.2731	0.5608	0.6442	-0.0834	biallelic	Autosomes	.
Adam9	ENSMUSG00000031555.17	protein_coding	chr8_25400000	9114.43	7899.53	0.2063	115.109	96.9969	0.5059	0.6783	-0.1724	biallelic	Autosomes	.
Adamts1	ENSMUSG00000022893.15	protein_coding	chr16_85600000	411.522	263.809	0.6318	37.6756	23.482	0.4228	0.5199	-0.0971	biallelic	Autosomes	.
Adamts10	ENSMUSG00000024299.18	protein_coding	chr17_33750000	611.189	628.504	-0.04	17.5672	17.5636	0.728	0.6227	0.1053	biallelic	Autosomes	.
Adamts12	ENSMUSG00000047497.11	protein_coding	chr15_11200000	3952.89	5245.18	-0.4076	11.8146	15.242	0.5135	0.6842	-0.1707	biallelic	Autosomes	.
Adamts14	ENSMUSG00000059901.13	protein_coding	chr10_61100000	748.383	973.052	-0.3765	8.3358	10.5375	0.9915	0.7437	0.2478	biallelic	Autosomes	.
Adamts15	ENSMUSG00000033453.9	protein_coding	chr9_30800000	34.9929	70.506	-0.9168	1.277	2.5015	0.933	0.6084	0.3246	biallelic	Autosomes	.
Adamts16	ENSMUSG00000049538.15	protein_coding	chr13_70900000	52.8867	66.3878	-0.3024	0.3944	0.4813	0.3575	0.8047	-0.4472	biallelic	Autosomes	.
Adamts17	ENSMUSG00000058145.17	protein_coding	chr7_66700000	198.655	525.696	-1.3818	0.5388	1.3863	0.9954	0.6413	0.354	skewed:CAST	Autosomes	.
Adamts18	ENSMUSG00000053399.10	protein_coding	chr8_114400000	23.0453	2.42122	1.918	0.1292	0.0132	0.4602	0.3155	0.1447	mono:B6	Autosomes	.
Adamts19	ENSMUSG00000053441.6	protein_coding	chr18_58950000	123.748	279.205	-1.1424	0.4839	1.0616	0.5536	0.4477	0.106	biallelic	Autosomes	.
Adamts2	ENSMUSG00000036545.10	protein_coding	chr11_50450000	239.341	173.76	0.4509	0.9902	0.6989	0.8607	0.5955	0.2652	biallelic	Autosomes	.
Adamts20	ENSMUSG00000022449.15	protein_coding	chr15_94250000	33.7871	78.0357	-1.0982	0.1471	0.3303	0.3266	0.6196	-0.293	biallelic	Autosomes	.
Adamts3	ENSMUSG00000043635.13	protein_coding	chr5_89800000	61.0084	74.9061	-0.2757	0.2515	0.3002	0.523	0.3219	0.2012	biallelic	Autosomes	.
Adamts5	ENSMUSG00000022894.7	protein_coding	chr16_85650000	372.752	239.818	0.6257	6.9411	4.3418	0.3757	0.3659	0.0098	biallelic	Autosomes	.
Adamts6	ENSMUSG00000046169.11	protein_coding	chr13_104400000	339.721	507.94	-0.5734	1.3828	2.0102	0.7549	0.5966	0.1584	biallelic	Autosomes	.
Adamts7	ENSMUSG00000032363.16	protein_coding	chr9_90000000	1172.21	1581.93	-0.4309	22.1446	29.0556	0.7071	0.5458	0.1613	biallelic	Autosomes	.
Adamts8	ENSMUSG00000031994.14	protein_coding	chr9_30850000	133.689	124.178	0.1025	5.342	4.8243	0.6899	0.5186	0.1712	biallelic	Autosomes	.
Adamts9	ENSMUSG00000030022.15	protein_coding	chr6_92700000	907.475	608.476	0.5728	4.5171	2.9448	0.875	0.7897	0.0853	biallelic	Autosomes	.
Adamtsl1	ENSMUSG00000066113.17	protein_coding	chr4_85650000	410.539	675.381	-0.7114	0.3818	0.6106	0.3835	0.7519	-0.3684	biallelic	Autosomes	.
Adamtsl2	ENSMUSG00000036040.15	protein_coding	chr2_26950000	30.9389	29.7788	0.0473	0.8885	0.8315	0.9416	0.8776	0.0639	biallelic	Autosomes	.
Adamtsl3	ENSMUSG00000070469.13	protein_coding	chr7_82050000	191.926	794.092	-2.0207	0.5853	2.3546	0.6702	0.8289	-0.1587	skewed:CAST	Autosomes	.
Adamtsl4	ENSMUSG00000015850.12	protein_coding	chr3_95550000	39.9105	20.7336	0.8034	2.8958	1.4626	0.8286	0.948	-0.1194	biallelic	Autosomes	.
Adamtsl5	ENSMUSG00000043822.19	protein_coding	chr10_80150000	10.8362	37.0812	-1.4099	0.9904	3.295	0.9863	0.9901	-0.0038	skewed:CAST	Autosomes	.
Adap1	ENSMUSG00000056413.17	protein_coding	chr5_139300000	12.8563	7.92622	0.4661	0.2034	0.1219	0.9476	0.7691	0.1785	biallelic	Autosomes	.
Adar	ENSMUSG00000027951.17	protein_coding	chr3_89600000	933.143	1004.64	-0.106	20.6463	21.6115	0.8496	0.8914	-0.0418	biallelic	Autosomes	.
Adarb1	ENSMUSG00000020262.16	protein_coding	chr10_77200000	266.342	311.515	-0.2222	1.7753	2.0188	0.9305	0.8053	0.1252	biallelic	Autosomes	.
Adarb2	ENSMUSG00000052551.17	protein_coding	chr13_8350000	307.97	881.873	-1.5027	0.4627	1.2881	0.1668	0.4387	-0.272	skewed:CAST	Autosomes	.
Adat1	ENSMUSG00000031949.18	protein_coding	chr8_112650000	296.242	153.012	0.9309	9.9177	4.9805	0.727	0.8499	-0.1229	biallelic	Autosomes	.
Adat2	ENSMUSG00000019808.9	protein_coding	chr10_13400000	216.195	182.729	0.2367	17.5347	14.4092	0.6034	0.599	0.0044	biallelic	Autosomes	.
Adck1	ENSMUSG00000021044.16	protein_coding	chr12_88400000	432.795	406.903	0.088	3.6369	3.3244	0.4413	0.6337	-0.1925	biallelic	Autosomes	.
Adck2	ENSMUSG00000046947.13	protein_coding	chr6_39550000	475.617	489.191	-0.0402	27.1446	27.1446	0.7698	0.8162	-0.0464	biallelic	Autosomes	.
Adcy1	ENSMUSG00000020431.6	protein_coding	chr11_7000000	782.32	574.098	0.4431	5.7825	4.1257	0.6611	0.8646	-0.2034	biallelic	Autosomes	.
Adcy10	ENSMUSG00000026567.17	protein_coding	chr1_165300000	3.27309	7.18786	-0.5589	0.0304	0.0649	0.6551	0.6236	0.0315	biallelic	Autosomes	.
Adcy2	ENSMUSG00000021536.8	protein_coding	chr13_68900000	576.113	946.894	-0.712	1.2906	2.0624	0.0602	0.2929	-0.2327	biallelic	Autosomes	.
Adcy3	ENSMUSG00000020654.16	protein_coding	chr12_4250000	257.232	136.649	0.8885	2.7192	1.4045	0.9639	0.802	0.1619	biallelic	Autosomes	.
Adcy5	ENSMUSG00000022840.10	protein_coding	chr16_35000000	229.226	90.6686	1.2918	1.2918	0.4968	0.9171	0.7621	0.155	skewed:B6	Autosomes	.
Adcy6	ENSMUSG00000022994.10	protein_coding	chr15_98500000	1797.24	1659.79	0.1144	76.0048	68.2446	0.988	0.8012	0.1868	biallelic	Autosomes	.
Adcy8	ENSMUSG00000022376.9	protein_coding	chr15_64750000	814.174	357.076	1.1779	3.0734	1.3105	0.488	0.3531	0.1349	skewed:B6	Autosomes	.
Adcy9	ENSMUSG00000005580.12	protein_coding	chr16_4150000	109.847	139.724	-0.3336	0.7023	0.8686	0.7296	0.9315	-0.2019	biallelic	Autosomes	.
Adcyap1r1	ENSMUSG00000029778.13	protein_coding	chr6_55400000	34303	38238	-0.1567	589.467	638.855	0.7128	0.7826	-0.0699	biallelic	Autosomes	.
Add1	ENSMUSG00000029106.15	protein_coding	chr5_34700000	5081.68	5441.41	-0.0986	73.6681	76.6942	0.9563	0.9868	-0.0305	biallelic	Autosomes	.
Add2	ENSMUSG00000030000.11	protein_coding	chr6_86000000	1075.52	484.468	1.1424	9.5516	4.1831	0.7669	0.9961	-0.2293	biallelic	Autosomes	.
Adgb	ENSMUSG00000050994.22	protein_coding	chr10_10200000	39.9439	30.6088	0.3359	0.2486	0.1852	0.3221	0.5284	-0.2063	biallelic	Autosomes	.
Adgra1	ENSMUSG00000025475.18	protein_coding	chr7_139400000	972.927	1249.28	-0.3591	18.8353	23.5144	0.6945	0.6246	0.07	biallelic	Autosomes	.
Adgra2	ENSMUSG00000031486.16	protein_coding	chr8_27600000	73.2313	82.9769	-0.1694	1.6447	1.8119	0.7934	0.6517	0.1417	biallelic	Autosomes	.
Adgra3	ENSMUSG00000029090.13	protein_coding	chr5_50150000	3576.16	3189.34	0.1649	30.6943	26.6147	0.5388	0.7489	-0.21	biallelic	Autosomes	.
Adgrb1	ENSMUSG00000034730.19	protein_coding	chr15_74350000	148.021	158.479	-0.0954	1.7175	1.7878	0.74	0.6692	0.0708	biallelic	Autosomes	.
Adgrb2	ENSMUSG00000028782.15	protein_coding	chr4_129850000	2400.66	2094.47	0.1964	54.0456	45.844	0.8612	0.9949	-0.1337	biallelic	Autosomes	.
Adgrb3	ENSMUSG00000033569.18	protein_coding	chr1_25650000	1868.44	2414.05	-0.3687	2.084	2.6178	0.5435	0.3838	0.1597	biallelic	Autosomes	.
Adgrf2	ENSMUSG00000057899.8	protein_coding	chr17_43000000	22.4867	13.5757	0.5653	0.4151	0.2437	0.3707	0.4613	-0.0905	biallelic	Autosomes	.
Adgrf4	ENSMUSG00000023918.13	protein_coding	chr17_42950000	12.695	4.69793	0.8676	0.3049	0.1097	0.3882	0.2789	0.1093	skewed:B6	Autosomes	.
Adgrg1	ENSMUSG00000031785.17	protein_coding	chr8_95700000	15886.3	17600.8	-0.1478	342.212	368.624	0.998	0.7636	0.2343	biallelic	Autosomes	.
Adgrg2	ENSMUSG00000031298.16	protein_coding	chrX_159250000	24.1233	0	2.5422	0.191	0	0.5523	0.2255	0.3268	mono:B6	X	.
Adgrg3	ENSMUSG00000060470.8	protein_coding	chr8_95700000	39.0214	36.9367	0.07	1.2038	1.1079	0.998	0.7636	0.2343	biallelic	Autosomes	.
Adgrg6	ENSMUSG00000039116.8	protein_coding	chr10_14350000	906.145	2014.69	-1.1484	5.3843	11.639	0.4638	0.7056	-0.2417	biallelic	Autosomes	.
Adgrl1	ENSMUSG00000013033.17	protein_coding	chr8_84600000	1148.56	863.429	0.4096	23.3327	17.0536	0.8855	0.921	-0.0355	biallelic	Autosomes	.
Adgrl2	ENSMUSG00000028184.14	protein_coding	chr3_148650000	1317.25	1090.41	0.2715	6.4002	5.1511	0.713	0.5189	0.1941	biallelic	Autosomes	.
Adgrl3	ENSMUSG00000037605.18	protein_coding	chr5_81400000	2705.37	2831.3	-0.0655	2.8571	2.9072	0.7277	0.4976	0.2301	biallelic	Autosomes	.
Adgrv1	ENSMUSG00000069170.15	protein_coding	chr13_81750000	167.935	374.689	-1.1346	0.2653	0.5756	0.3625	0.6117	-0.2492	biallelic	Autosomes	.
Adh5	ENSMUSG00000028138.9	protein_coding	chr3_138150000	5403.82	4967.22	0.1214	370.31	330.945	0.765	0.6201	0.1449	biallelic	Autosomes	.
Adhfe1	ENSMUSG00000025911.15	protein_coding	chr1_9650000	1222.49	1792.4	-0.5502	31.7587	45.2721	0.7845	0.7189	0.0655	biallelic	Autosomes	.
Adi1	ENSMUSG00000020629.13	protein_coding	chr12_28700000	1313.31	1348.44	-0.0379	160.789	160.508	0.8465	0.9251	-0.0786	biallelic	Autosomes	.
Adipor1	ENSMUSG00000026457.15	protein_coding	chr1_134350000	1533.03	3020.98	-0.9763	72.5147	138.932	0.9072	0.8196	0.0876	biallelic	Autosomes	.
Adipor2	ENSMUSG00000030168.14	protein_coding	chr6_119300000	1580.42	2050.94	-0.3749	20.8135	26.2607	0.7737	0.8782	-0.1045	biallelic	Autosomes	.
Adissp	ENSMUSG00000027327.17	protein_coding	chr2_130950000	659.331	599.739	0.1356	40.7451	36.0341	0.9111	0.9854	-0.0743	biallelic	Autosomes	.
Adk	ENSMUSG00000039197.11	protein_coding	chr14_21400000	971.877	965.785	0.009	2.0865	2.0159	0.6785	0.8906	-0.2121	biallelic	Autosomes	.
Adnp2	ENSMUSG00000053950.11	protein_coding	chr18_80150000	853.264	914.007	-0.0987	28.819	30.014	0.8176	0.6727	0.1449	biallelic	Autosomes	.
Ado	ENSMUSG00000057134.8	protein_coding	chr10_67350000	1238.11	1071.85	0.2071	230.981	194.415	0.8178	0.6274	0.1904	biallelic	Autosomes	.
Adora1	ENSMUSG00000042429.10	protein_coding	chr1_134150000	567.182	1822.48	-1.6753	13.318	41.6061	0.8373	0.8975	-0.0602	skewed:CAST	Autosomes	.
Adora2a	ENSMUSG00000020178.7	protein_coding	chr10_75150000	192.693	150.272	0.3485	9.1483	6.9363	0.891	0.67	0.221	biallelic	Autosomes	.
Adora2b	ENSMUSG00000018500.3	protein_coding	chr11_62100000	66.3902	80.7706	-0.2648	3.231	3.8217	0.8514	0.9694	-0.1181	biallelic	Autosomes	.
Adpgk	ENSMUSG00000025236.12	protein_coding	chr9_59200000	424.294	344.253	0.2977	11.1009	8.7569	0.8843	0.9884	-0.1042	biallelic	Autosomes	.
Adprm	ENSMUSG00000020910.17	protein_coding	chr11_66900000	436.792	436.335	0.0015	25.2801	24.5529	0.6218	0.6752	-0.0535	biallelic	Autosomes	.
Adprs	ENSMUSG00000042558.17	protein_coding	chr4_126200000	433.936	415.564	0.0617	65.2248	60.7301	0.8624	0.8665	-0.0042	biallelic	Autosomes	.
Adra1a	ENSMUSG00000045875.14	protein_coding	chr14_66850000	71.111	204.048	-1.4577	0.4448	1.2409	0.6042	0.8551	-0.251	skewed:CAST	Autosomes	.
Adra1b	ENSMUSG00000050541.15	protein_coding	chr11_43650000	29.1746	19.9107	0.4562	0.1959	0.13	0.8212	0.4407	0.3805	biallelic	Autosomes	.
Adra1d	ENSMUSG00000027335.10	protein_coding	chr2_131350000	9.05803	13.218	-0.374	0.4686	0.6649	0.9603	0.8337	0.1266	biallelic	Autosomes	.
Adra2a	ENSMUSG00000033717.7	protein_coding	chr19_54000000	210.587	196.504	0.0975	37.0588	33.621	0.7392	0.6324	0.1068	biallelic	Autosomes	.
Adrb1	ENSMUSG00000035283.6	protein_coding	chr19_56700000	36.7377	16.515	0.956	2.8617	1.2507	0.8474	0.963	-0.1157	biallelic	Autosomes	.
Adrb2	ENSMUSG00000045730.5	protein_coding	chr18_62300000	13.4287	7.11915	0.6047	5.3273	2.7459	0.6064	0.5512	0.0553	biallelic	Autosomes	.
Adrm1	ENSMUSG00000039041.16	protein_coding	chr2_179800000	25.5651	25.9796	-0.0194	4.527	4.4728	0.8534	0.811	0.0424	biallelic	Autosomes	.
Adsl	ENSMUSG00000022407.11	protein_coding	chr15_80800000	1947.92	1441.66	0.4329	73.7452	53.0649	0.9991	0.8509	0.1482	biallelic	Autosomes	.
Adss2	ENSMUSG00000015961.9	protein_coding	chr1_177550000	1084.34	1506.11	-0.4722	27.4777	37.1067	0.639	0.5138	0.1252	biallelic	Autosomes	.
Aebp1	ENSMUSG00000020473.14	protein_coding	chr11_5800000	124.59	166.511	-0.4043	10.4447	13.5718	0.8927	0.767	0.1257	biallelic	Autosomes	.
Aebp2	ENSMUSG00000030232.20	protein_coding	chr6_140700000	1105.64	1119.79	-0.0183	5.65	5.5635	0.4766	0.3071	0.1696	biallelic	Autosomes	.
Aen	ENSMUSG00000030609.19	protein_coding	chr7_78550000	0	1340.71	-8.0722	0	72.1708	0.8518	0.7389	0.1129	mono:CAST	Autosomes	.
Afap1	ENSMUSG00000029094.13	protein_coding	chr5_36050000	2404.63	1890.32	0.3464	18.483	14.1266	0.9367	0.8191	0.1175	biallelic	Autosomes	.
Afap1l1	ENSMUSG00000033032.16	protein_coding	chr18_61850000	46.8933	45.9361	0.0269	0.7063	0.6727	0.8287	0.7363	0.0924	biallelic	Autosomes	.
Afap1l2	ENSMUSG00000025083.19	protein_coding	chr19_56900000	324.034	140.883	1.1734	2.8735	1.2147	0.9216	0.9885	-0.0669	skewed:B6	Autosomes	.
Afdn	ENSMUSG00000068036.17	protein_coding	chr17_13950000	1272.66	1027.12	0.3079	7.4305	5.8304	0.8295	0.6358	0.1937	biallelic	Autosomes	.
Aff1	ENSMUSG00000029313.19	protein_coding	chr5_103900000	1616.55	1584.85	0.0285	8.4341	8.0392	0.7583	0.8651	-0.1068	biallelic	Autosomes	.
Aff2	ENSMUSG00000031189.13	protein_coding	chrX_68800000	412.18	2.04059	5.8888	0.6901	0.0033	0.2771	0.5596	-0.2825	mono:B6	X	.
Aff3	ENSMUSG00000037138.19	protein_coding	chr1_38650000	14.5735	24.1064	-0.5724	0.0254	0.0409	0.3203	0.6819	-0.3616	biallelic	Autosomes	.
Aff4	ENSMUSG00000049470.14	protein_coding	chr11_53250000	3406.05	3444.04	-0.016	40.7857	40.0962	0.9246	0.8871	0.0375	biallelic	Autosomes	.
Afg1l	ENSMUSG00000038302.15	protein_coding	chr10_42300000	272.418	156.378	0.7816	1.3953	0.7787	0.9878	0.8481	0.1397	biallelic	Autosomes	.
Afg2a	ENSMUSG00000027722.15	protein_coding	chr3_37600000	394.194	406.625	-0.0442	2.1051	2.1112	0.7475	0.8964	-0.1489	biallelic	Autosomes	.
Afg2b	ENSMUSG00000118663.1	protein_coding	chr2_122450000	202.013	206.304	-0.0296	12.6003	12.5108	0.6698	0.6605	0.0093	biallelic	Autosomes	.
Afg3l1	ENSMUSG00000031967.16	protein_coding	chr8_124200000	1671.98	1880.79	-0.1693	54.6433	59.7619	0.9678	0.9686	-0.0008	biallelic	Autosomes	.
Afg3l2	ENSMUSG00000024527.11	protein_coding	chr18_67500000	1426.36	1338.46	0.0914	27.3064	24.9125	0.9853	0.803	0.1823	biallelic	Autosomes	.
Aftph	ENSMUSG00000049659.16	protein_coding	chr11_20600000	506.626	509.997	-0.0095	7.6225	7.4603	0.9494	0.8093	0.1401	biallelic	Autosomes	.
Aga	ENSMUSG00000031521.6	protein_coding	chr8_53950000	865.04	1139.52	-0.3956	62.8882	80.5441	0.2952	0.4762	-0.181	biallelic	Autosomes	.
Agap1	ENSMUSG00000055013.17	protein_coding	chr1_89400000	2185.02	2137.78	0.0315	4.195	3.9904	0.753	0.9684	-0.2154	biallelic	Autosomes	.
Agap2	ENSMUSG00000025422.11	protein_coding	chr10_126900000	513.069	619.073	-0.2686	24.3884	28.6107	0.9748	0.968	0.0068	biallelic	Autosomes	.
Agap3	ENSMUSG00000023353.15	protein_coding	chr5_24700000	437.262	401.994	0.1199	7.4542	6.6628	0.9838	0.9997	-0.0159	biallelic	Autosomes	.
Agbl1	ENSMUSG00000025754.12	protein_coding	chr7_76650000	5.48203	7.11915	-0.2094	0.0052	0.0066	0.4195	0.122	0.2975	biallelic	Autosomes	.
Agbl2	ENSMUSG00000040812.15	protein_coding	chr2_90650000	16.8769	15.7608	0.0755	0.2775	0.2519	0.8006	0.8661	-0.0655	biallelic	Autosomes	.
Agbl3	ENSMUSG00000038836.16	protein_coding	chr6_34800000	331.562	501.509	-0.5897	3.5669	5.2454	0.7661	0.5761	0.19	biallelic	Autosomes	.
Agbl4	ENSMUSG00000061298.16	protein_coding	chr4_111050000	14.6817	36.9667	-1.0924	0.0099	0.0243	0.1632	0.475	-0.3118	skewed:CAST	Autosomes	.
Agbl5	ENSMUSG00000029165.18	protein_coding	chr5_31000000	228.77	261.445	-0.1887	10.6447	11.8275	0.9072	0.9309	-0.0236	biallelic	Autosomes	.
Ager	ENSMUSG00000015452.15	protein_coding	chr17_34800000	58.5321	46.1193	0.3136	16.1878	12.4009	0.9898	0.8869	0.1029	biallelic	Autosomes	.
Agfg1	ENSMUSG00000026159.14	protein_coding	chr1_82800000	2061.92	3251.75	-0.656	28.4112	43.5627	0.6297	0.5842	0.0454	biallelic	Autosomes	.
Agfg2	ENSMUSG00000029722.16	protein_coding	chr5_137600000	623.098	821.93	-0.3968	15.4606	19.8283	0.8843	0.8203	0.064	biallelic	Autosomes	.
Aggf1	ENSMUSG00000021681.9	protein_coding	chr13_95500000	3403.29	2804.4	0.2788	117.285	93.9644	0.568	0.8628	-0.2948	biallelic	Autosomes	.
Agl	ENSMUSG00000033400.15	protein_coding	chr3_116500000	1672.45	1577.86	0.0837	20.8582	19.1323	0.8849	0.6957	0.1891	biallelic	Autosomes	.
Agmo	ENSMUSG00000050103.19	protein_coding	chr12_37400000	107.357	113.154	-0.0726	0.268	0.2746	0.1658	0.3658	-0.2	biallelic	Autosomes	.
Ago1	ENSMUSG00000041530.18	protein_coding	chr4_126300000	2753.8	3057.74	-0.1508	69.7372	75.2854	0.7108	0.7763	-0.0654	biallelic	Autosomes	.
Ago2	ENSMUSG00000036698.12	protein_coding	chr15_73000000	1361.04	1443.9	-0.085	12.9878	13.3961	0.983	0.6741	0.3088	biallelic	Autosomes	.
Ago3	ENSMUSG00000028842.16	protein_coding	chr4_126250000	1042.28	958.805	0.1198	9.0555	8.0991	0.8178	0.8875	-0.0697	biallelic	Autosomes	.
Ago4	ENSMUSG00000042500.12	protein_coding	chr4_126400000	392.767	417.961	-0.0886	7.6008	7.8639	0.7402	0.8405	-0.1003	biallelic	Autosomes	.
Agpat1	ENSMUSG00000034254.18	protein_coding	chr17_34800000	860.368	844.262	0.0271	79.6172	75.9589	0.9898	0.8869	0.1029	biallelic	Autosomes	.
Agpat2	ENSMUSG00000026922.14	protein_coding	chr2_26450000	26.0293	33.2961	-0.3036	1.948	2.4226	0.9862	0.973	0.0131	biallelic	Autosomes	.
Agpat3	ENSMUSG00000001211.16	protein_coding	chr10_78100000	3107.27	3546.71	-0.1905	31.7083	35.1883	0.9897	0.9078	0.0819	biallelic	Autosomes	.
Agpat4	ENSMUSG00000023827.9	protein_coding	chr17_12300000	582.085	521.266	0.1578	4.9025	4.2684	0.708	0.8606	-0.1526	biallelic	Autosomes	.
Agpat5	ENSMUSG00000031467.11	protein_coding	chr8_18900000	1125.9	975.427	0.206	21.2312	17.8833	0.6411	0.743	-0.1019	biallelic	Autosomes	.
Agps	ENSMUSG00000042410.17	protein_coding	chr2_75650000	733.075	670.338	0.1282	6.2842	5.587	0.9065	0.7085	0.1981	biallelic	Autosomes	.
Agrn	ENSMUSG00000041936.19	protein_coding	chr4_156200000	17109.8	17892.9	-0.0645	451.764	459.331	0.6787	0.8536	-0.1749	biallelic	Autosomes	.
Agrp	ENSMUSG00000005705.11	protein_coding	chr8_106300000	8.40501	15.7308	-0.629	0.1011	0.1839	0.9402	0.8566	0.0836	biallelic	Autosomes	.
Agt	ENSMUSG00000031980.11	protein_coding	chr8_125250000	623.32	1522.07	-1.2812	40.2305	95.5121	0.8505	0.9323	-0.0818	skewed:CAST	Autosomes	.
Agtpbp1	ENSMUSG00000021557.16	protein_coding	chr13_59650000	424.319	363.387	0.2208	2.5862	2.1534	0.9516	0.7862	0.1654	biallelic	Autosomes	.
Agtr1a	ENSMUSG00000049115.16	protein_coding	chr13_30550000	7.02415	10.6065	-0.3762	0.1286	0.1888	0.5674	0.4583	0.109	biallelic	Autosomes	.
Agtrap	ENSMUSG00000029007.9	protein_coding	chr4_148150000	1673.36	1116.08	0.5822	129.682	84.0941	0.7505	0.9424	-0.1919	biallelic	Autosomes	.
Ahctf1	ENSMUSG00000026491.14	protein_coding	chr1_179600000	754.552	973.968	-0.3661	10.9122	13.6945	0.9496	0.8133	0.1363	biallelic	Autosomes	.
Ahcy	ENSMUSG00000027597.16	protein_coding	chr2_154900000	520.722	380.064	0.4492	29.1494	20.6852	0.7584	0.7758	-0.0174	biallelic	Autosomes	.
Ahcyl2	ENSMUSG00000029772.18	protein_coding	chr6_29900000	2365.74	1879.39	0.3312	13.938	10.7654	0.9387	0.7569	0.1818	biallelic	Autosomes	.
Ahdc1	ENSMUSG00000037692.15	protein_coding	chr4_132750000	800.168	860.395	-0.1041	10.176	10.6383	0.893	0.9588	-0.0659	biallelic	Autosomes	.
Ahi1	ENSMUSG00000019986.18	protein_coding	chr10_20950000	1124.88	812.793	0.4664	7.4782	5.2535	0.6597	0.9157	-0.256	biallelic	Autosomes	.
Ahnak	ENSMUSG00000069833.14	protein_coding	chr19_8950000	114.47	108.151	0.0784	1.1105	1.0201	0.9005	0.6437	0.2568	biallelic	Autosomes	.
Ahr	ENSMUSG00000019256.18	protein_coding	chr12_35500000	7.4687	13.4541	-0.5656	0.1713	0.3	0.5779	0.4209	0.157	biallelic	Autosomes	.
Ahrr	ENSMUSG00000021575.17	protein_coding	chr13_74350000	22.17	1.21061	2.1292	0.2321	0.0123	0.4926	0.5737	-0.0811	mono:B6	Autosomes	.
Ahsa1	ENSMUSG00000021037.8	protein_coding	chr12_87300000	50.5775	40.6443	0.2841	5.7187	4.468	0.7493	0.82	-0.0707	biallelic	Autosomes	.
Ahsa2	ENSMUSG00000020288.14	protein_coding	chr11_23400000	866.675	829.558	0.0628	72.6059	67.5681	0.5566	0.6679	-0.1113	biallelic	Autosomes	.
Aida	ENSMUSG00000042901.11	protein_coding	chr1_183050000	1219.87	1532.27	-0.3277	36.7795	44.9166	0.907	0.9911	-0.0841	biallelic	Autosomes	.
Aifm1	ENSMUSG00000036932.15	protein_coding	chrX_47600000	216.169	2.82475	4.821	4.7587	0.0605	0.9749	0.7645	0.2104	mono:B6	X	.
Aifm2	ENSMUSG00000020085.16	protein_coding	chr10_61550000	344.951	361.778	-0.0678	12.2207	12.4612	0.9746	0.7719	0.2026	biallelic	Autosomes	.
Aifm3	ENSMUSG00000022763.19	protein_coding	chr16_17300000	140.521	106.103	0.3893	6.6837	4.9066	0.8882	0.8986	-0.0103	biallelic	Autosomes	.
Aig1	ENSMUSG00000019806.14	protein_coding	chr10_13600000	212.265	159.539	0.401	0.8131	0.5942	0.743	0.4664	0.2766	biallelic	Autosomes	.
Aimp1	ENSMUSG00000028029.12	protein_coding	chr3_132350000	1260.82	1110.64	0.1822	44.8694	38.4283	0.4755	0.4074	0.0681	biallelic	Autosomes	.
Aimp2	ENSMUSG00000029610.14	protein_coding	chr5_143800000	328.951	316.964	0.0527	39.1514	36.6779	0.7649	0.7995	-0.0346	biallelic	Autosomes	.
Aip	ENSMUSG00000024847.16	protein_coding	chr19_4150000	576.361	652.255	-0.177	42.9367	47.2423	0.9001	0.9572	-0.0571	biallelic	Autosomes	.
Airim	ENSMUSG00000044730.18	protein_coding	chr4_124800000	650.204	593.821	0.1298	72.6566	64.515	0.9057	0.8562	0.0496	biallelic	Autosomes	.
Airn	ENSMUSG00000078247.8	lncRNA	chr17_12950000	925.506	1905.88	-1.0381	6.6063	13.2268	0.7615	0.8106	-0.0491	biallelic	Autosomes	.
Ajm1	ENSMUSG00000029419.9	protein_coding	chr2_25450000	145	103.127	0.4722	19.4404	13.4428	0.9695	0.9789	-0.0093	biallelic	Autosomes	.
Ajuba	ENSMUSG00000022178.12	protein_coding	chr14_54800000	492.181	513.127	-0.0595	41.486	42.0514	0.9052	0.8277	0.0775	biallelic	Autosomes	.
Ak2	ENSMUSG00000028792.15	protein_coding	chr4_128850000	1446.24	1586.8	-0.1334	62.8239	67.017	0.8724	0.993	-0.1205	biallelic	Autosomes	.
Ak3	ENSMUSG00000024782.8	protein_coding	chr19_28950000	2496.77	2055.61	0.2799	78.2452	62.6323	0.8843	0.965	-0.0808	biallelic	Autosomes	.
Ak4	ENSMUSG00000028527.19	protein_coding	chr4_101300000	3336.68	3761.3	-0.1726	59.4468	65.1524	0.5358	0.6693	-0.1335	biallelic	Autosomes	.
Ak5	ENSMUSG00000039058.12	protein_coding	chr3_152350000	189.074	248.902	-0.3877	0.782	1.0009	0.8507	0.667	0.1837	biallelic	Autosomes	.
Ak6	ENSMUSG00000078941.10	protein_coding	chr13_100800000	619.048	727.007	-0.2302	34.2188	39.0713	0.808	0.959	-0.151	biallelic	Autosomes	.
Ak7	ENSMUSG00000041323.7	protein_coding	chr12_105700000	11.6309	7.99493	0.3559	0.1293	0.0864	0.8643	0.8251	0.0392	biallelic	Autosomes	.
Ak8	ENSMUSG00000026807.9	protein_coding	chr2_28550000	4.95685	6.31207	-0.1841	0.0373	0.0462	0.853	0.9748	-0.1219	biallelic	Autosomes	.
Ak9	ENSMUSG00000091415.6	protein_coding	chr10_41250000	37.3377	21.3504	0.6841	0.2431	0.1352	0.5567	0.7171	-0.1604	biallelic	Autosomes	.
Akap10	ENSMUSG00000047804.16	protein_coding	chr11_61800000	572.247	520.276	0.1361	8.2534	7.2956	0.9629	0.9684	-0.0055	biallelic	Autosomes	.
Akap11	ENSMUSG00000022016.18	protein_coding	chr14_78750000	1973.56	1902.79	0.0525	37.6515	35.2941	0.8192	0.6072	0.2119	biallelic	Autosomes	.
Akap12	ENSMUSG00000038587.11	protein_coding	chr10_4300000	536.095	608.416	-0.181	4.8959	5.4022	0.8622	0.7505	0.1117	biallelic	Autosomes	.
Akap13	ENSMUSG00000066406.17	protein_coding	chr7_75300000	635.055	609.015	0.0599	1.8052	1.6832	0.9461	0.7621	0.184	biallelic	Autosomes	.
Akap5	ENSMUSG00000021057.16	protein_coding	chr12_76350000	510.814	445.139	0.1965	46.8872	39.7252	0.8529	0.7852	0.0677	biallelic	Autosomes	.
Akap6	ENSMUSG00000061603.9	protein_coding	chr12_52800000	143.536	227.446	-0.6461	0.2675	0.4121	0.9897	0.7564	0.2333	biallelic	Autosomes	.
Akap7	ENSMUSG00000039166.17	protein_coding	chr10_25150000	396.217	412.572	-0.0576	2.4272	2.4572	0.8578	0.7249	0.1329	biallelic	Autosomes	.
Akap9	ENSMUSG00000040407.19	protein_coding	chr5_4100000	1836.08	1731.77	0.0841	10.1852	9.34	0.6234	0.9296	-0.3061	biallelic	Autosomes	.
Akip1	ENSMUSG00000031023.6	protein_coding	chr7_109300000	200.693	218.038	-0.1168	20.0752	21.2051	0.7712	0.8537	-0.0825	biallelic	Autosomes	.
Akirin1	ENSMUSG00000023075.10	protein_coding	chr4_123600000	550.027	540.227	0.0257	29.6215	28.2865	0.9238	0.8491	0.0746	biallelic	Autosomes	.
Akna	ENSMUSG00000039158.12	protein_coding	chr4_63250000	315.473	332.952	-0.0766	7.4029	7.5963	0.8392	0.9542	-0.115	biallelic	Autosomes	.
Akr1a1	ENSMUSG00000028692.15	protein_coding	chr4_116450000	5095.42	5435.98	-0.0933	285.556	296.188	0.8665	0.9328	-0.0663	biallelic	Autosomes	.
Akr1b1	ENSMUSG00000001642.19	protein_coding	chr6_34250000	791.005	511.222	0.6248	44.7005	28.088	0.8932	0.6961	0.1971	biallelic	Autosomes	.
Akr1b10	ENSMUSG00000061758.14	protein_coding	chr6_34350000	1467.17	1188.38	0.3029	97.967	77.1497	0.7592	0.9698	-0.2107	biallelic	Autosomes	.
Akr1b8	ENSMUSG00000029762.7	protein_coding	chr6_34300000	10.0888	17.9617	-0.6058	0.5979	1.035	0.8029	0.9922	-0.1893	biallelic	Autosomes	.
Akr1c13	ENSMUSG00000021213.13	protein_coding	chr13_4250000	368.201	142.725	1.337	21.6687	8.1663	0.117	0.1871	-0.0701	skewed:B6	Autosomes	.
Akr1e1	ENSMUSG00000045410.19	protein_coding	chr13_4650000	1132.21	655.7	0.7834	52.2442	29.4169	0.4401	0.1881	0.252	biallelic	Autosomes	.
Akr7a5	ENSMUSG00000028743.8	protein_coding	chr4_139000000	809.982	710.291	0.1882	89.639	76.4254	0.9691	0.971	-0.0018	biallelic	Autosomes	.
Akt1	ENSMUSG00000001729.15	protein_coding	chr12_112600000	5008.31	4663.68	0.1027	202.147	183.014	0.9251	0.9638	-0.0387	biallelic	Autosomes	.
Akt1s1	ENSMUSG00000011096.18	protein_coding	chr7_44500000	1775.78	1887.04	-0.0874	234.787	242.575	0.9782	0.9178	0.0604	biallelic	Autosomes	.
Akt2	ENSMUSG00000004056.17	protein_coding	chr7_27250000	1379.02	1251.52	0.1394	23.7929	20.994	0.951	0.929	0.0219	biallelic	Autosomes	.
Akt3	ENSMUSG00000019699.17	protein_coding	chr1_176850000	860.641	1100.49	-0.3528	3.0726	3.8198	0.7933	0.5293	0.264	biallelic	Autosomes	.
Aktip	ENSMUSG00000031667.17	protein_coding	chr8_91850000	646.433	577.276	0.1619	6.2315	5.4104	0.9575	0.874	0.0835	biallelic	Autosomes	.
Alad	ENSMUSG00000028393.11	protein_coding	chr4_62400000	429.689	567.148	-0.3964	33.9846	43.6117	0.7315	0.6575	0.074	biallelic	Autosomes	.
Alas1	ENSMUSG00000032786.17	protein_coding	chr9_106100000	909.693	912.563	-0.0045	50.8834	49.6276	0.9268	0.8498	0.077	biallelic	Autosomes	.
Albfm1	ENSMUSG00000070690.8	protein_coding	chr5_90700000	12.8229	8.7791	0.3712	0.2965	0.1974	0.784	0.736	0.0479	biallelic	Autosomes	.
Alcam	ENSMUSG00000022636.14	protein_coding	chr16_52250000	401.416	264.096	0.5948	1.6641	1.0644	0.3956	0.2841	0.1114	biallelic	Autosomes	.
Aldh16a1	ENSMUSG00000007833.16	protein_coding	chr7_44800000	455.758	549.344	-0.2668	27.8751	32.6667	0.9858	0.9095	0.0763	biallelic	Autosomes	.
Aldh18a1	ENSMUSG00000025007.14	protein_coding	chr19_40500000	3053.32	2065.87	0.5625	67.9418	44.6936	0.704	0.961	-0.2569	biallelic	Autosomes	.
Aldh1a1	ENSMUSG00000053279.9	protein_coding	chr19_20450000	397.14	539.927	-0.4384	2.2397	2.9604	0.3423	0.5285	-0.1862	biallelic	Autosomes	.
Aldh1a3	ENSMUSG00000015134.16	protein_coding	chr7_66000000	27.8409	26.4889	0.0607	0.6462	0.5978	0.952	0.8694	0.0826	biallelic	Autosomes	.
Aldh1a7	ENSMUSG00000024747.4	protein_coding	chr19_20650000	30.8445	7.52268	1.5172	0.7577	0.1797	0.398	0.3101	0.0879	skewed:B6	Autosomes	.
Aldh1b1	ENSMUSG00000035561.6	protein_coding	chr4_45750000	24.979	18.182	0.3709	3.8044	2.6923	0.7892	0.8274	-0.0381	biallelic	Autosomes	.
Aldh1l1	ENSMUSG00000030088.16	protein_coding	chr6_90450000	499.352	709.794	-0.5031	3.7312	5.1565	0.8587	0.7255	0.1332	biallelic	Autosomes	.
Aldh1l2	ENSMUSG00000020256.15	protein_coding	chr10_83300000	739.835	325.527	1.1722	13.4712	5.7629	0.9063	0.9664	-0.0601	skewed:B6	Autosomes	.
Aldh2	ENSMUSG00000029455.15	protein_coding	chr5_121700000	3909.05	4000.23	-0.0332	119.555	118.95	0.9516	0.9393	0.0123	biallelic	Autosomes	.
Aldh3a2	ENSMUSG00000010025.20	protein_coding	chr11_61150000	1849.78	2169.39	-0.2294	35.7027	40.7096	0.929	0.9363	-0.0073	biallelic	Autosomes	.
Aldh3b1	ENSMUSG00000024885.10	protein_coding	chr19_3950000	728.184	519.315	0.4837	37.94	26.3067	0.9729	0.9875	-0.0146	biallelic	Autosomes	.
Aldh5a1	ENSMUSG00000035936.7	protein_coding	chr13_25100000	1033.91	1000.66	0.0469	29.2195	27.4951	0.789	0.6889	0.1001	biallelic	Autosomes	.
Aldh6a1	ENSMUSG00000021238.12	protein_coding	chr12_84450000	2674.86	2628.35	0.0253	112.093	107.088	0.8732	0.7974	0.0759	biallelic	Autosomes	.
Aldh7a1	ENSMUSG00000053644.14	protein_coding	chr18_56700000	6574.4	4487.94	0.5503	88.3478	58.6362	0.9616	0.9937	-0.0321	biallelic	Autosomes	.
Aldh9a1	ENSMUSG00000026687.15	protein_coding	chr1_167150000	1632.78	1548.55	0.0762	74.8672	69.0346	0.6821	0.627	0.0551	biallelic	Autosomes	.
Aldoa	ENSMUSG00000030695.17	protein_coding	chr7_126350000	13347.4	15182.1	-0.1858	2056.79	2274.6	0.9953	0.8432	0.1521	biallelic	Autosomes	.
Aldoc	ENSMUSG00000017390.16	protein_coding	chr11_78200000	19242.4	3065.04	2.6483	3398.91	526.375	0.9378	0.9907	-0.053	skewed:B6	Autosomes	.
Alg1	ENSMUSG00000039427.15	protein_coding	chr16_5050000	794.55	571.125	0.4728	59.8254	41.8094	0.6627	0.6341	0.0286	biallelic	Autosomes	.
Alg10b	ENSMUSG00000075470.3	protein_coding	chr15_90100000	4881.93	3728.24	0.3885	453.098	336.421	0.6415	0.6204	0.0211	biallelic	Autosomes	.
Alg11	ENSMUSG00000063362.14	protein_coding	chr8_22550000	1647.3	2561.06	-0.6351	128.411	194.102	0.6656	0.6093	0.0563	biallelic	Autosomes	.
Alg13	ENSMUSG00000041718.17	protein_coding	chrX_143100000	1246.82	109.887	3.4457	18.7125	1.6034	0.4446	0.3753	0.0693	mono:B6	X	.
Alg14	ENSMUSG00000039887.12	protein_coding	chr3_121100000	988.87	458.047	1.1019	11.7874	5.3084	0.9261	0.7373	0.1888	biallelic	Autosomes	.
Alg2	ENSMUSG00000039740.7	protein_coding	chr4_47450000	1134.63	1212.96	-0.0959	104.101	108.201	0.6414	0.9214	-0.2799	biallelic	Autosomes	.
Alg3	ENSMUSG00000033809.16	protein_coding	chr16_20400000	93.5309	107.511	-0.1914	12.5005	13.9703	0.9698	0.8006	0.1692	biallelic	Autosomes	.
Alg5	ENSMUSG00000036632.10	protein_coding	chr3_54650000	1162.53	1067.15	0.1229	62.6353	55.9014	0.7627	0.9086	-0.1459	biallelic	Autosomes	.
Alg6	ENSMUSG00000073792.12	protein_coding	chr4_99600000	255.153	168.673	0.583	4.5384	2.9169	0.7942	0.5963	0.1979	biallelic	Autosomes	.
Alg8	ENSMUSG00000035704.18	protein_coding	chr7_97000000	451.743	491.295	-0.1198	18.6622	19.733	0.909	0.7784	0.1305	biallelic	Autosomes	.
Alg9	ENSMUSG00000032059.14	protein_coding	chr9_50750000	924.505	875.796	0.0777	11.4702	10.5643	0.8682	0.7732	0.095	biallelic	Autosomes	.
Alkbh1	ENSMUSG00000079036.11	protein_coding	chr12_87450000	712.902	632.811	0.1707	33.3429	28.7758	0.8152	0.7382	0.077	biallelic	Autosomes	.
Alkbh2	ENSMUSG00000044339.13	protein_coding	chr5_114250000	81.8724	84.2262	-0.0386	16.2171	16.2204	0.8871	0.9836	-0.0965	biallelic	Autosomes	.
Alkbh3	ENSMUSG00000040174.15	protein_coding	chr2_93800000	404.687	344.248	0.2303	11.3708	9.4042	0.7163	0.8534	-0.1372	biallelic	Autosomes	.
Alkbh4	ENSMUSG00000039754.11	protein_coding	chr5_136150000	277.402	296.898	-0.0963	43.122	44.8719	0.9944	0.9988	-0.0044	biallelic	Autosomes	.
Alkbh5	ENSMUSG00000042650.4	protein_coding	chr11_60400000	2345.73	2883.45	-0.2972	90.1101	107.693	0.8726	0.8775	-0.0049	biallelic	Autosomes	.
Alkbh6	ENSMUSG00000042831.14	protein_coding	chr7_30000000	594.926	536.866	0.1468	90.5275	79.426	0.7889	0.8629	-0.074	biallelic	Autosomes	.
Alkbh7	ENSMUSG00000002661.15	protein_coding	chr17_57300000	6.5934	5.90854	0.0878	2.8267	2.4628	0.917	0.9487	-0.0317	biallelic	Autosomes	.
Alkbh8	ENSMUSG00000025899.15	protein_coding	chr9_3350000	760.033	821.826	-0.1121	11.5354	12.1271	0.5693	0.3962	0.1732	biallelic	Autosomes	.
Alpk1	ENSMUSG00000028028.12	protein_coding	chr3_127500000	259.172	258.707	0.0025	1.9991	1.9401	0.5019	0.7106	-0.2087	biallelic	Autosomes	.
Alpl	ENSMUSG00000028766.11	protein_coding	chr4_137500000	1813.48	506.522	1.8299	28.2105	7.6608	0.9884	0.9284	0.06	skewed:B6	Autosomes	.
Als2	ENSMUSG00000026024.15	protein_coding	chr1_59200000	939.138	1271.47	-0.4351	10.745	14.1437	0.9765	0.8453	0.1312	biallelic	Autosomes	.
Als2cl	ENSMUSG00000044037.16	protein_coding	chr9_110700000	1689.55	3706.76	-1.1312	69.5242	148.299	0.8325	0.7741	0.0585	biallelic	Autosomes	.
Alx4	ENSMUSG00000040310.13	protein_coding	chr2_93500000	187.854	145.229	0.3603	4.0997	3.0815	0.8069	0.9107	-0.1038	biallelic	Autosomes	.
Alyref	ENSMUSG00000025134.3	protein_coding	chr11_120450000	612.73	479.922	0.3492	83.4263	63.5306	0.9213	0.9792	-0.058	biallelic	Autosomes	.
Alyref2	ENSMUSG00000060244.3	protein_coding	chr1_171300000	181.863	226.887	-0.3114	120.979	146.742	0.555	0.5984	-0.0434	biallelic	Autosomes	.
Amacr	ENSMUSG00000022244.8	protein_coding	chr15_10950000	258.006	411.924	-0.6647	14.7508	22.8971	0.7152	0.5445	0.1707	biallelic	Autosomes	.
Ambra1	ENSMUSG00000040506.17	protein_coding	chr2_91600000	279.548	237.864	0.2285	1.2593	1.0418	0.8226	0.6549	0.1676	biallelic	Autosomes	.
Amd1	ENSMUSG00000075232.7	protein_coding	chr10_40150000	144.222	152.54	-0.0783	8.3239	8.5597	0.7992	0.9393	-0.1401	biallelic	Autosomes	.
Amd2	ENSMUSG00000063953.4	protein_coding	chr10_35550000	0	21.6464	-2.4139	0	5.5617	0.0707	0.0445	0.0262	mono:CAST	Autosomes	.
Amdhd2	ENSMUSG00000036820.13	protein_coding	chr17_24350000	704.484	603.418	0.2217	75.4971	62.8718	0.9509	0.9793	-0.0283	biallelic	Autosomes	.
Amer1	ENSMUSG00000050332.8	protein_coding	chrX_94450000	467.028	0.807072	6.3449	16.1703	0.0272	0.4172	0.312	0.1052	mono:B6	X	.
Amer2	ENSMUSG00000021986.10	protein_coding	chr14_60600000	2012.39	2019.33	-0.005	114.529	111.735	0.8204	0.9201	-0.0997	biallelic	Autosomes	.
Amer3	ENSMUSG00000045174.11	protein_coding	chr1_34600000	4.33725	82.5838	-3.2296	0.3267	6.0477	0.6107	0.521	0.0896	mono:CAST	Autosomes	.
Amfr	ENSMUSG00000031751.15	protein_coding	chr8_94650000	3684.65	3063.3	0.266	75.9324	61.376	0.6894	0.7535	-0.0641	biallelic	Autosomes	.
Amh	ENSMUSG00000035262.6	protein_coding	chr10_80600000	14.8233	5.52791	0.913	5.24	1.8999	0.9623	0.9983	-0.036	skewed:B6	Autosomes	.
Amhr2	ENSMUSG00000023047.12	protein_coding	chr15_102350000	8.45222	2.46703	0.8492	0.7755	0.2201	0.9672	0.8953	0.0719	skewed:B6	Autosomes	.
Amigo1	ENSMUSG00000050947.10	protein_coding	chr3_108050000	115.075	126.386	-0.1299	16.4395	17.5543	0.9908	0.8871	0.1038	biallelic	Autosomes	.
Amigo2	ENSMUSG00000048218.7	protein_coding	chr15_97100000	10.2972	44.611	-1.6974	2.7686	11.6615	0.4551	0.518	-0.0629	skewed:CAST	Autosomes	.
Ammecr1	ENSMUSG00000042225.4	protein_coding	chrX_141650000	435.834	3.84505	5.6392	3.2057	0.0275	0.7614	0.4157	0.3457	mono:B6	X	.
Ammecr1l	ENSMUSG00000041915.10	protein_coding	chr18_31900000	1211.38	1392.61	-0.2004	44.9384	50.2281	0.816	0.9529	-0.1369	biallelic	Autosomes	.
Amn	ENSMUSG00000021278.8	protein_coding	chr12_111200000	8.18273	2.65734	0.7837	1.3049	0.412	0.8429	0.9779	-0.1351	skewed:B6	Autosomes	.
Amn1	ENSMUSG00000068250.14	protein_coding	chr6_149050000	95.1478	123.219	-0.3565	2.5626	3.2266	0.6102	0.5531	0.0572	biallelic	Autosomes	.
Amot	ENSMUSG00000041688.17	protein_coding	chrX_144200000	2657.31	2.2309	8.5243	38.4491	0.0314	0.6117	0.4692	0.1425	mono:B6	X	.
Amotl1	ENSMUSG00000013076.18	protein_coding	chr9_14550000	4408.97	3327.81	0.4053	36.3594	26.6819	0.9551	0.7327	0.2224	biallelic	Autosomes	.
Ampd2	ENSMUSG00000027889.18	protein_coding	chr3_107950000	588.912	691.398	-0.2297	39.77	45.3954	0.9602	0.9742	-0.014	biallelic	Autosomes	.
Ampd3	ENSMUSG00000005686.18	protein_coding	chr7_110350000	162.13	567.895	-1.7773	3.1185	10.6201	0.9063	0.9944	-0.0881	skewed:CAST	Autosomes	.
Amph	ENSMUSG00000021314.14	protein_coding	chr13_19200000	1244.44	1512.2	-0.2801	5.219	6.1659	0.635	0.3846	0.2504	biallelic	Autosomes	.
Amt	ENSMUSG00000032607.13	protein_coding	chr9_108150000	623.823	919.395	-0.5559	97.3287	139.464	0.9191	0.9793	-0.0602	biallelic	Autosomes	.
Amz1	ENSMUSG00000050022.17	protein_coding	chr5_140700000	87.6261	80.5503	0.1146	1.9966	1.7844	0.8466	0.9938	-0.1472	biallelic	Autosomes	.
Amz2	ENSMUSG00000020610.18	protein_coding	chr11_109300000	2794.02	2834.85	-0.0209	88.4112	87.2141	0.7126	0.7367	-0.024	biallelic	Autosomes	.
Anapc1	ENSMUSG00000014355.11	protein_coding	chr2_128450000	3873.81	3796.1	0.0292	42.6116	40.5982	0.9315	0.9788	-0.0472	biallelic	Autosomes	.
Anapc10	ENSMUSG00000036977.9	protein_coding	chr8_80500000	376.366	447.31	-0.2461	4.7587	5.4987	0.5059	0.3304	0.1755	biallelic	Autosomes	.
Anapc11	ENSMUSG00000025135.13	protein_coding	chr11_120450000	464.625	584.647	-0.3283	40.4011	49.4269	0.9213	0.9792	-0.058	biallelic	Autosomes	.
Anapc15	ENSMUSG00000030649.19	protein_coding	chr7_101500000	133.75	144.371	-0.1064	2.9818	3.1293	0.8924	0.987	-0.0946	biallelic	Autosomes	.
Anapc16	ENSMUSG00000020107.11	protein_coding	chr10_59800000	1758.99	1518.15	0.2118	95.0916	79.7945	0.9371	0.885	0.0521	biallelic	Autosomes	.
Anapc2	ENSMUSG00000026965.13	protein_coding	chr2_25150000	1388.57	1346.91	0.0438	87.8538	82.8536	0.9626	0.9606	0.0019	biallelic	Autosomes	.
Anapc4	ENSMUSG00000029176.14	protein_coding	chr5_52950000	1088.94	1273.54	-0.225	27.4017	31.1575	0.5004	0.8714	-0.3709	biallelic	Autosomes	.
Anapc5	ENSMUSG00000029472.14	protein_coding	chr5_122950000	4106.83	3880.3	0.0818	103.053	94.6667	0.9183	0.7197	0.1986	biallelic	Autosomes	.
Anapc7	ENSMUSG00000029466.12	protein_coding	chr5_122550000	762.842	925.79	-0.2776	27.9311	32.9567	0.9348	0.9435	-0.0087	biallelic	Autosomes	.
Angel1	ENSMUSG00000021257.16	protein_coding	chr12_86750000	363.919	324.297	0.1639	9.1754	7.9496	0.8069	0.9014	-0.0944	biallelic	Autosomes	.
Angel2	ENSMUSG00000026634.17	protein_coding	chr1_190650000	1888.98	2478.32	-0.3908	73.4974	93.7521	0.728	0.899	-0.171	biallelic	Autosomes	.
Angpt1	ENSMUSG00000022309.10	protein_coding	chr15_42250000	51.3308	56.2448	-0.1207	0.173	0.1843	0.4313	0.1645	0.2668	biallelic	Autosomes	.
Angptl4	ENSMUSG00000002289.17	protein_coding	chr17_34000000	18.7633	15.6092	0.2054	1.9742	1.5968	0.7883	0.9818	-0.1935	biallelic	Autosomes	.
Angptl6	ENSMUSG00000038742.8	protein_coding	chr9_20750000	137.548	190.953	-0.4591	19.7562	26.6658	0.897	0.9065	-0.0095	biallelic	Autosomes	.
Ank	ENSMUSG00000022265.8	protein_coding	chr15_27450000	2882.24	2828.28	0.0272	19.1086	18.2306	0.9675	0.7014	0.2661	biallelic	Autosomes	.
Ank1	ENSMUSG00000031543.19	protein_coding	chr8_23450000	86.5874	65.7323	0.3728	0.4191	0.3093	0.9143	0.765	0.1493	biallelic	Autosomes	.
Ank2	ENSMUSG00000032826.20	protein_coding	chr3_127050000	11516.5	10090.9	0.1906	16.9467	14.4369	0.8417	0.7216	0.1201	biallelic	Autosomes	.
Ank3	ENSMUSG00000069601.15	protein_coding	chr10_69750000	179.925	106.246	0.7332	0.2433	0.1397	0.9179	0.6889	0.2291	biallelic	Autosomes	.
Ankef1	ENSMUSG00000074771.11	protein_coding	chr2_136400000	18.1633	14.7634	0.229	0.2566	0.2028	0.1148	0.4093	-0.2945	biallelic	Autosomes	.
Ankib1	ENSMUSG00000040351.12	protein_coding	chr5_3750000	780.444	973.949	-0.3177	5.8755	7.1289	0.7794	0.5993	0.1802	biallelic	Autosomes	.
Ankle1	ENSMUSG00000046295.14	protein_coding	chr8_71850000	206.612	199.481	0.0495	45.1082	42.3428	0.8885	0.8346	0.0539	biallelic	Autosomes	.
Ankle2	ENSMUSG00000029501.16	protein_coding	chr5_110400000	1385.97	1379.43	0.0068	45.9495	44.4639	0.6779	0.9951	-0.3173	biallelic	Autosomes	.
Ankmy2	ENSMUSG00000036188.5	protein_coding	chr12_36200000	1184.94	1291.04	-0.1232	25.0735	26.5606	0.5376	0.4097	0.1279	biallelic	Autosomes	.
Ankra2	ENSMUSG00000021661.17	protein_coding	chr13_98400000	1016.95	1204.75	-0.2434	74.0205	85.2566	0.8371	0.7618	0.0753	biallelic	Autosomes	.
Ankrd10	ENSMUSG00000031508.15	protein_coding	chr8_11650000	1212.85	1251.87	-0.0455	42.6536	42.8042	0.8325	0.9327	-0.1002	biallelic	Autosomes	.
Ankrd11	ENSMUSG00000035569.18	protein_coding	chr8_123700000	3856.57	3654.41	0.0776	20.6915	19.0628	0.9958	0.9219	0.0739	biallelic	Autosomes	.
Ankrd12	ENSMUSG00000034647.16	protein_coding	chr17_66300000	1480.98	1483.77	-0.0027	11.303	11.0101	0.9138	0.6369	0.2769	biallelic	Autosomes	.
Ankrd13a	ENSMUSG00000041870.18	protein_coding	chr5_114900000	934.654	1001.54	-0.0992	25.2069	26.2613	0.944	0.8818	0.0622	biallelic	Autosomes	.
Ankrd13b	ENSMUSG00000037907.17	protein_coding	chr11_77350000	1536.38	1228.54	0.3214	68.0539	52.9081	0.9982	0.9213	0.0769	biallelic	Autosomes	.
Ankrd13c	ENSMUSG00000039988.16	protein_coding	chr3_157700000	879.355	996.377	-0.1793	12.2968	13.5466	0.5007	0.4538	0.0469	biallelic	Autosomes	.
Ankrd16	ENSMUSG00000047909.12	protein_coding	chr2_11750000	1504.17	2216.19	-0.5576	102.688	147.098	0.7077	0.8407	-0.133	biallelic	Autosomes	.
Ankrd17	ENSMUSG00000055204.17	protein_coding	chr5_90500000	2016.17	2145.19	-0.0893	12.2949	12.7187	0.6173	0.9154	-0.298	biallelic	Autosomes	.
Ankrd24	ENSMUSG00000054708.18	protein_coding	chr10_81450000	372.495	500.141	-0.4202	16.606	21.6779	0.7882	0.7418	0.0464	biallelic	Autosomes	.
Ankrd26	ENSMUSG00000007827.11	protein_coding	chr6_118450000	687.008	652.937	0.0728	9.5877	8.8593	0.3784	0.6215	-0.2432	biallelic	Autosomes	.
Ankrd27	ENSMUSG00000034867.17	protein_coding	chr7_35250000	955.952	1029.39	-0.1062	15.3392	16.0593	0.716	0.9672	-0.2512	biallelic	Autosomes	.
Ankrd28	ENSMUSG00000014496.9	protein_coding	chr14_31500000	543.555	733.922	-0.4298	3.5039	4.5998	0.9385	0.7394	0.1991	biallelic	Autosomes	.
Ankrd29	ENSMUSG00000057766.15	protein_coding	chr18_12400000	244.762	118.421	1.017	3.8942	1.8318	0.9163	0.7191	0.1972	biallelic	Autosomes	.
Ankrd33b	ENSMUSG00000022237.18	protein_coding	chr15_31300000	52.6172	76.3687	-0.498	0.5867	0.8279	0.7178	0.5871	0.1307	biallelic	Autosomes	.
Ankrd34b	ENSMUSG00000045034.13	protein_coding	chr13_92550000	9.13866	4.84243	0.5226	0.4929	0.2539	0.6972	0.5635	0.1336	biallelic	Autosomes	.
Ankrd37	ENSMUSG00000050914.17	protein_coding	chr8_46450000	126.063	62.83	0.9503	12.1718	5.8981	0.8217	0.7441	0.0776	biallelic	Autosomes	.
Ankrd39	ENSMUSG00000079610.10	protein_coding	chr1_36550000	41.311	56.4668	-0.4085	3.534	4.6964	0.9875	0.8499	0.1376	biallelic	Autosomes	.
Ankrd40	ENSMUSG00000020864.14	protein_coding	chr11_94200000	1729.91	2060.12	-0.2514	106.264	123.036	0.8033	0.8475	-0.0442	biallelic	Autosomes	.
Ankrd42	ENSMUSG00000041343.20	protein_coding	chr7_92250000	170.057	305.623	-0.8273	2.6087	4.5583	0.6584	0.4998	0.1586	biallelic	Autosomes	.
Ankrd44	ENSMUSG00000052331.15	protein_coding	chr1_54650000	115.006	120.012	-0.059	0.3479	0.353	0.9255	0.5983	0.3272	biallelic	Autosomes	.
Ankrd46	ENSMUSG00000048307.9	protein_coding	chr15_36450000	1998.54	2173.46	-0.1208	88.7145	93.802	0.8792	0.8241	0.0552	biallelic	Autosomes	.
Ankrd49	ENSMUSG00000031931.5	protein_coding	chr9_14650000	808.46	673.23	0.2623	131.217	106.236	0.8274	0.781	0.0464	biallelic	Autosomes	.
Ankrd50	ENSMUSG00000044864.17	protein_coding	chr3_38500000	1164.37	1252.75	-0.1051	27.8176	29.0987	0.6926	0.6269	0.0657	biallelic	Autosomes	.
Ankrd52	ENSMUSG00000014498.10	protein_coding	chr10_128200000	650.72	647.851	0.0063	17.5128	16.9518	0.9646	0.7951	0.1695	biallelic	Autosomes	.
Ankrd54	ENSMUSG00000033055.13	protein_coding	chr15_78900000	417.081	334.963	0.3121	36.1855	28.2546	0.9775	0.941	0.0365	biallelic	Autosomes	.
Ankrd6	ENSMUSG00000040183.14	protein_coding	chr4_32800000	297.503	222.408	0.4117	1.7228	1.2522	0.75	0.9679	-0.2179	biallelic	Autosomes	.
Ankrd61	ENSMUSG00000029607.15	protein_coding	chr5_143800000	9.42195	3.06088	0.8393	1.1535	0.3643	0.7649	0.7995	-0.0346	skewed:B6	Autosomes	.
Ankrd9	ENSMUSG00000037904.15	protein_coding	chr12_110900000	52.5976	45.9432	0.1771	12.128	10.2997	0.985	0.8761	0.1089	biallelic	Autosomes	.
Anks1	ENSMUSG00000024219.17	protein_coding	chr17_28150000	694.31	602.912	0.2021	3.8462	3.2472	0.9795	0.759	0.2205	biallelic	Autosomes	.
Anks1b	ENSMUSG00000058589.16	protein_coding	chr10_90550000	267.823	215.652	0.3062	0.207	0.1621	0.6097	0.2692	0.3406	biallelic	Autosomes	.
Anks3	ENSMUSG00000022515.7	protein_coding	chr16_4750000	851.68	929.788	-0.1259	31.8001	33.7532	0.9746	0.9161	0.0584	biallelic	Autosomes	.
Anks6	ENSMUSG00000066191.13	protein_coding	chr4_47000000	468.054	639.81	-0.4469	9.5291	12.6645	0.7489	0.8946	-0.1457	biallelic	Autosomes	.
Ankub1	ENSMUSG00000074591.9	protein_coding	chr3_57550000	5.92658	65.8855	-2.6976	0.1423	1.5381	0.931	0.7601	0.1709	mono:CAST	Autosomes	.
Ankzf1	ENSMUSG00000026199.19	protein_coding	chr1_75150000	526.049	793.908	-0.5892	61.805	90.6874	0.9734	0.8145	0.1588	biallelic	Autosomes	.
Anln	ENSMUSG00000036777.9	protein_coding	chr9_22200000	1699.08	1691.36	0.0066	25.2637	24.4511	0.8305	0.7482	0.0822	biallelic	Autosomes	.
Ano10	ENSMUSG00000037949.9	protein_coding	chr9_122100000	1813.18	1650.4	0.1353	13.0029	11.5071	0.6029	0.9158	-0.3129	biallelic	Autosomes	.
Ano3	ENSMUSG00000074968.12	protein_coding	chr2_110550000	414.094	384.011	0.1075	1.1905	1.0733	0.6497	0.2894	0.3603	biallelic	Autosomes	.
Ano4	ENSMUSG00000035189.18	protein_coding	chr10_89100000	10.8224	4.08117	0.801	0.0232	0.0085	0.4241	0.1875	0.2366	skewed:B6	Autosomes	.
Ano6	ENSMUSG00000064210.8	protein_coding	chr15_95700000	3743.04	3276	0.192	17.303	14.7238	0.7447	0.916	-0.1713	biallelic	Autosomes	.
Ano8	ENSMUSG00000034863.10	protein_coding	chr8_71900000	569.55	534.131	0.0918	48.6931	44.3978	0.8793	0.7246	0.1547	biallelic	Autosomes	.
Anp32a	ENSMUSG00000032249.15	protein_coding	chr9_62200000	5223.87	4714.26	0.1479	118.369	103.857	0.8503	0.9494	-0.0991	biallelic	Autosomes	.
Anp32b	ENSMUSG00000028333.11	protein_coding	chr4_46450000	2821.82	3011.71	-0.0938	110.272	114.427	0.7505	0.8349	-0.0844	biallelic	Autosomes	.
Anp32e	ENSMUSG00000015749.13	protein_coding	chr3_95850000	1789.74	1828.18	-0.0306	83.8597	83.284	0.9738	0.9416	0.0322	biallelic	Autosomes	.
Antxr1	ENSMUSG00000033420.13	protein_coding	chr6_87150000	2993.16	2411.57	0.3111	12.5992	9.8694	0.9754	0.7311	0.2442	biallelic	Autosomes	.
Antxr2	ENSMUSG00000029338.14	protein_coding	chr5_98050000	308.095	493.29	-0.6704	1.7667	2.7501	0.3743	0.0536	0.3207	biallelic	Autosomes	.
Anxa1	ENSMUSG00000024659.16	protein_coding	chr19_20350000	42.7449	547.238	-3.5319	2.0747	25.8236	0.52	0.5134	0.0066	mono:CAST	Autosomes	.
Anxa11	ENSMUSG00000021866.16	protein_coding	chr14_25850000	29.5719	41.2452	-0.4197	0.5631	0.7636	0.9602	0.8473	0.1129	biallelic	Autosomes	.
Anxa2	ENSMUSG00000032231.15	protein_coding	chr9_69350000	584.321	406.568	0.5179	13.0127	8.803	0.8585	0.8919	-0.0334	biallelic	Autosomes	.
Anxa3	ENSMUSG00000029484.13	protein_coding	chr5_96900000	17.4492	0.403536	2.0547	0.2819	0.0063	0.426	0.6549	-0.2289	mono:B6	Autosomes	.
Anxa4	ENSMUSG00000029994.18	protein_coding	chr6_86700000	26.1906	37.4302	-0.444	0.3924	0.5452	0.9579	0.8239	0.134	biallelic	Autosomes	.
Anxa5	ENSMUSG00000027712.14	protein_coding	chr3_36500000	2247.3	2321.8	-0.0469	70.8369	71.1545	0.9412	0.8767	0.0646	biallelic	Autosomes	.
Anxa6	ENSMUSG00000018340.14	protein_coding	chr11_54850000	10235.9	150.559	6.0407	160.15	2.2903	0.9159	0.8072	0.1087	mono:B6	Autosomes	.
Anxa7	ENSMUSG00000021814.18	protein_coding	chr14_20500000	762.15	157.603	2.2382	26.05	5.2373	0.945	0.9234	0.0215	skewed:B6	Autosomes	.
Anxa9	ENSMUSG00000015702.15	protein_coding	chr3_95200000	29.1746	8.7791	1.3104	2.2385	0.6549	0.9313	0.9945	-0.0632	skewed:B6	Autosomes	.
Aoc2	ENSMUSG00000078651.9	protein_coding	chr11_101200000	56.4235	115.834	-0.9762	10.3403	20.6389	0.926	0.9877	-0.0617	biallelic	Autosomes	.
Aoc3	ENSMUSG00000019326.15	protein_coding	chr11_101200000	1.01694	17.2463	-1.8865	0.0763	1.2578	0.926	0.9877	-0.0617	mono:CAST	Autosomes	.
Aopep	ENSMUSG00000021458.19	protein_coding	chr13_63150000	119.763	38.9227	1.5061	0.2819	0.0891	0.6994	0.924	-0.2246	skewed:B6	Autosomes	.
Aox1	ENSMUSG00000063558.5	protein_coding	chr1_58050000	1160.31	1874.96	-0.69	12.8977	20.2632	0.8733	0.7327	0.1406	biallelic	Autosomes	.
Aox4	ENSMUSG00000038242.13	protein_coding	chr1_58300000	27.3295	108.297	-1.8092	0.3992	1.538	0.8685	0.7398	0.1287	skewed:CAST	Autosomes	.
Ap1ar	ENSMUSG00000074238.7	protein_coding	chr3_127600000	436.314	391.261	0.1554	12.1554	10.5978	0.5532	0.535	0.0183	biallelic	Autosomes	.
Ap1b1	ENSMUSG00000009090.18	protein_coding	chr11_4900000	939.806	905.523	0.0533	14.2759	13.3734	0.9652	0.9996	-0.0344	biallelic	Autosomes	.
Ap1g1	ENSMUSG00000031731.17	protein_coding	chr8_110500000	3022.2	3032.24	-0.0048	29.998	29.2625	0.8257	0.7786	0.0472	biallelic	Autosomes	.
Ap1g2	ENSMUSG00000040701.18	protein_coding	chr14_55300000	53.8506	46.6216	0.1891	5.7098	4.8061	0.802	0.8721	-0.0701	biallelic	Autosomes	.
Ap1m1	ENSMUSG00000003033.16	protein_coding	chr8_72950000	1233.27	1306.05	-0.0824	60.3711	62.1598	0.9122	0.805	0.1071	biallelic	Autosomes	.
Ap1s1	ENSMUSG00000004849.15	protein_coding	chr5_137050000	1864.38	1698.54	0.134	142.255	126.005	0.7881	0.9139	-0.1258	biallelic	Autosomes	.
Ap1s2	ENSMUSG00000031367.16	protein_coding	chrX_162650000	1193.62	18.7001	5.6603	41.1683	0.6271	0.5366	0.4322	0.1044	mono:B6	X	.
Ap2a1	ENSMUSG00000060279.16	protein_coding	chr7_44550000	2301.74	2129.05	0.1123	67.1917	60.426	0.9109	0.9818	-0.071	biallelic	Autosomes	.
Ap2a2	ENSMUSG00000002957.12	protein_coding	chr7_141200000	2829.71	2691.48	0.0721	33.9603	31.4051	0.9301	0.7358	0.1943	biallelic	Autosomes	.
Ap2b1	ENSMUSG00000035152.15	protein_coding	chr11_83250000	5205.25	5128.55	0.0214	41.7433	39.987	0.7682	0.5813	0.1869	biallelic	Autosomes	.
Ap2m1	ENSMUSG00000022841.16	protein_coding	chr16_20350000	1284.16	1406.08	-0.1304	115.76	123.233	0.9806	0.9078	0.0728	biallelic	Autosomes	.
Ap2s1	ENSMUSG00000008036.12	protein_coding	chr7_16450000	2425.77	2411.72	0.0084	189.478	183.153	0.9074	0.8846	0.0228	biallelic	Autosomes	.
Ap3b1	ENSMUSG00000021686.7	protein_coding	chr13_94650000	1346	1038.06	0.3732	5.5185	4.1379	0.6334	0.8709	-0.2375	biallelic	Autosomes	.
Ap3b2	ENSMUSG00000062444.16	protein_coding	chr7_81100000	475.342	513.343	-0.1098	12.0537	12.6561	0.8396	0.752	0.0876	biallelic	Autosomes	.
Ap3d1	ENSMUSG00000020198.9	protein_coding	chr10_80550000	1302.47	1365.45	-0.0679	31.3612	31.9652	0.982	0.9993	-0.0173	biallelic	Autosomes	.
Ap3m1	ENSMUSG00000021824.14	protein_coding	chr14_21050000	1454.14	1411.59	0.0427	58.6842	55.3863	0.9015	0.9792	-0.0777	biallelic	Autosomes	.
Ap3m2	ENSMUSG00000031539.7	protein_coding	chr8_23250000	5493.37	6491.05	-0.2406	255.649	293.697	0.7005	0.8787	-0.1782	biallelic	Autosomes	.
Ap3s1	ENSMUSG00000024480.10	protein_coding	chr18_46900000	235.521	271.659	-0.2019	4.0905	4.5872	0.5083	0.7251	-0.2167	biallelic	Autosomes	.
Ap3s2	ENSMUSG00000063801.8	protein_coding	chr7_79500000	2409.03	2799.69	-0.2164	45.1867	51.0572	0.8816	0.8582	0.0235	biallelic	Autosomes	.
Ap4e1	ENSMUSG00000001998.16	protein_coding	chr2_126850000	269.66	209.698	0.3553	3.873	2.9282	0.8041	0.936	-0.1319	biallelic	Autosomes	.
Ap4m1	ENSMUSG00000019518.12	protein_coding	chr5_138150000	939.031	1092.85	-0.2178	94.7334	107.192	0.8482	0.8465	0.0017	biallelic	Autosomes	.
Ap4s1	ENSMUSG00000020955.10	protein_coding	chr12_51750000	424.229	276.14	0.6105	6.7096	4.2462	0.7737	0.8237	-0.05	biallelic	Autosomes	.
Ap5b1	ENSMUSG00000049562.7	protein_coding	chr19_5600000	71.4887	67.0345	0.0866	18.7813	17.1224	0.9813	0.9827	-0.0014	biallelic	Autosomes	.
Ap5m1	ENSMUSG00000036291.7	protein_coding	chr14_49300000	543.057	549.237	-0.0162	16.4083	16.1346	0.8797	0.8297	0.05	biallelic	Autosomes	.
Ap5s1	ENSMUSG00000068264.12	protein_coding	chr2_131050000	526.747	606.807	-0.2023	69.5797	77.9309	0.8271	0.8978	-0.0707	biallelic	Autosomes	.
Ap5z1	ENSMUSG00000039623.14	protein_coding	chr5_142450000	706.669	685.827	0.0429	40.6864	38.3908	0.878	0.8242	0.0538	biallelic	Autosomes	.
Apaf1	ENSMUSG00000019979.13	protein_coding	chr10_90850000	1776.83	1670.75	0.0885	16.1629	14.7763	0.581	0.7657	-0.1846	biallelic	Autosomes	.
Apba1	ENSMUSG00000024897.10	protein_coding	chr19_23850000	419.896	307.725	0.4422	1.8718	1.3337	0.7128	0.9052	-0.1923	biallelic	Autosomes	.
Apba2	ENSMUSG00000030519.15	protein_coding	chr7_64250000	1102.66	511.306	1.1012	3.7174	1.6759	0.5586	0.7038	-0.1452	biallelic	Autosomes	.
Apbb1	ENSMUSG00000037032.18	protein_coding	chr7_105200000	767.005	672.496	0.1884	28.1429	23.9905	0.7361	0.6712	0.0649	biallelic	Autosomes	.
Apbb2	ENSMUSG00000029207.18	protein_coding	chr5_66700000	559.397	727.559	-0.3762	1.4858	1.8788	0.9061	0.7761	0.1299	biallelic	Autosomes	.
Apbb3	ENSMUSG00000117679.2	protein_coding	chr18_36800000	192.518	213.684	-0.1469	19.9306	21.5079	0.9142	0.9404	-0.0262	biallelic	Autosomes	.
Apc	ENSMUSG00000005871.16	protein_coding	chr18_34350000	4809.82	4908.18	-0.0292	40.2357	39.9192	0.853	0.7583	0.0947	biallelic	Autosomes	.
Apc2	ENSMUSG00000020135.14	protein_coding	chr10_80100000	876.985	699.727	0.3237	33.4546	25.9521	0.9731	0.8374	0.1357	biallelic	Autosomes	.
Apcdd1	ENSMUSG00000071847.15	protein_coding	chr18_63050000	5752.11	3485.59	0.7219	125.556	73.9717	0.7568	0.7284	0.0284	biallelic	Autosomes	.
Apeh	ENSMUSG00000032590.15	protein_coding	chr9_107950000	554.413	477.71	0.2128	51.2711	42.9519	0.9901	0.9744	0.0158	biallelic	Autosomes	.
Apex2	ENSMUSG00000025269.17	protein_coding	chrX_149350000	682.96	0	7.1043	8.2534	0	0.6655	0.6258	0.0397	mono:B6	X	.
Aph1b	ENSMUSG00000032375.16	protein_coding	chr9_66650000	2058.93	1135.69	0.8555	86.2775	46.2696	0.9974	0.9168	0.0806	biallelic	Autosomes	.
Aph1c	ENSMUSG00000053040.14	protein_coding	chr9_66700000	169.593	252.171	-0.5587	7.3069	10.5633	0.9031	0.9119	-0.0088	biallelic	Autosomes	.
Api5	ENSMUSG00000027193.13	protein_coding	chr2_94250000	2218.51	1982.21	0.1621	71.296	61.9346	0.8402	0.592	0.2483	biallelic	Autosomes	.
Apip	ENSMUSG00000010911.13	protein_coding	chr2_102900000	741.849	453.916	0.7026	33.2481	19.7791	0.6915	0.8763	-0.1849	biallelic	Autosomes	.
Aplf	ENSMUSG00000030051.11	protein_coding	chr6_87600000	492.928	494.092	-0.0034	9.5744	9.3307	0.9304	0.9925	-0.0621	biallelic	Autosomes	.
Apln	ENSMUSG00000037010.8	protein_coding	chrX_47100000	6233.65	971.898	2.675	545.951	82.7582	0.9907	0.7788	0.2119	skewed:B6	X	ESCAPEE
Aplp1	ENSMUSG00000006651.9	protein_coding	chr7_30100000	674.902	1421.1	-1.0687	54.3702	111.307	0.9934	0.6835	0.3098	biallelic	Autosomes	.
Aplp2	ENSMUSG00000031996.18	protein_coding	chr9_31100000	19312.4	9280.37	1.0569	263.716	123.21	0.9658	0.6854	0.2804	biallelic	Autosomes	.
Apmap	ENSMUSG00000033096.8	protein_coding	chr2_150400000	963.498	929.217	0.052	32.1387	30.1352	0.3866	0.3089	0.0777	biallelic	Autosomes	.
Apobec1	ENSMUSG00000040613.15	protein_coding	chr6_122550000	456.507	355.092	0.358	15.7432	11.906	0.7031	0.4958	0.2073	biallelic	Autosomes	.
Apobec3	ENSMUSG00000009585.19	protein_coding	chr15_79800000	90.1024	33.3877	1.3088	3.1592	1.1382	0.9902	0.9725	0.0177	skewed:B6	Autosomes	.
Apobr	ENSMUSG00000042759.13	protein_coding	chr7_126150000	9.77207	2.25381	1.0261	1.9923	0.4467	0.9426	0.8484	0.0942	skewed:B6	Autosomes	.
Apoc1	ENSMUSG00000040564.15	protein_coding	chr7_19400000	21.7669	62.4898	-1.3342	5.8211	16.2478	0.841	0.861	-0.02	skewed:CAST	Autosomes	.
Apoe	ENSMUSG00000002985.17	protein_coding	chr7_19400000	20011.7	24570.3	-0.296	5525.49	6595.94	0.841	0.861	-0.02	biallelic	Autosomes	.
Apoh	ENSMUSG00000000049.12	protein_coding	chr11_108300000	11.442	3.86795	0.8907	0.1369	0.045	0.8151	0.6538	0.1613	skewed:B6	Autosomes	.
Apol7d	ENSMUSG00000073652.12	lncRNA	chr1_71650000	41.7476	42.1668	-0.0129	0.3591	0.3526	0.8465	0.5813	0.2653	biallelic	Autosomes	.
Apold1	ENSMUSG00000090698.3	protein_coding	chr6_134950000	1.63655	23.9461	-2.1249	0.2718	3.8673	0.7962	0.7093	0.0869	mono:CAST	Autosomes	.
Apon	ENSMUSG00000051716.7	protein_coding	chr10_128050000	6.49897	6.50239	-0.0004	3.0695	2.9859	0.9447	0.8851	0.0595	biallelic	Autosomes	.
Apoo	ENSMUSG00000079508.9	protein_coding	chrX_93400000	588.363	0.403536	6.7789	10.0088	0.0067	0.6447	0.6697	-0.0251	mono:B6	X	.
App	ENSMUSG00000022892.12	protein_coding	chr16_84850000	6552.45	9795.97	-0.5798	24.8597	36.1341	0.5404	0.7622	-0.2218	biallelic	Autosomes	.
Appbp2	ENSMUSG00000018481.10	protein_coding	chr11_85050000	1864.84	1885.54	-0.0159	33.1201	32.5586	0.989	0.7629	0.2262	biallelic	Autosomes	.
Appbp2os	ENSMUSG00000085628.7	lncRNA	chr11_85100000	51.8836	33.319	0.57	1.5256	0.9525	0.8511	0.7171	0.1341	biallelic	Autosomes	.
Appl1	ENSMUSG00000040760.12	protein_coding	chr14_26650000	1902.48	2087	-0.1332	30.9585	33.0187	0.6501	0.8486	-0.1985	biallelic	Autosomes	.
Appl2	ENSMUSG00000020263.15	protein_coding	chr10_83450000	4281.67	2736.17	0.6451	74.737	46.4349	0.9257	0.7581	0.1677	biallelic	Autosomes	.
Aptx	ENSMUSG00000028411.16	protein_coding	chr4_40650000	811.699	751.179	0.1111	33.1572	29.8335	0.5982	0.8702	-0.272	biallelic	Autosomes	.
Aqp1	ENSMUSG00000004655.6	protein_coding	chr6_55300000	6.40455	7.92622	-0.1807	0.4491	0.5404	0.7311	0.7837	-0.0527	biallelic	Autosomes	.
Aqp11	ENSMUSG00000042797.10	protein_coding	chr7_97350000	177.72	119.808	0.5499	10.5783	6.9333	0.7896	0.8092	-0.0195	biallelic	Autosomes	.
Aqp4	ENSMUSG00000024411.12	protein_coding	chr18_15500000	1265.11	3564.31	-1.4907	50.0575	137.118	0.4637	0.4732	-0.0095	skewed:CAST	Autosomes	.
Aqp9	ENSMUSG00000032204.14	protein_coding	chr9_71000000	43.0892	49.7054	-0.186	0.6313	0.7081	0.9357	0.8481	0.0876	biallelic	Autosomes	.
Aqr	ENSMUSG00000040383.17	protein_coding	chr2_113950000	1683.9	1133.63	0.5688	16.6744	10.9141	0.7695	0.6859	0.0836	biallelic	Autosomes	.
Ar	ENSMUSG00000046532.9	protein_coding	chrX_97200000	102.217	0	4.4225	0.4981	0	0.2882	0.5648	-0.2766	mono:B6	X	.
Araf	ENSMUSG00000001127.13	protein_coding	chrX_20700000	2041.76	1096.83	0.8934	27.6821	14.4582	0.8933	0.7242	0.1691	biallelic	X	ESCAPEE
Arap1	ENSMUSG00000032812.19	protein_coding	chr7_101050000	1354.54	915.474	0.5627	17.8485	11.7283	0.9453	0.8238	0.1215	biallelic	Autosomes	.
Arap2	ENSMUSG00000037999.14	protein_coding	chr5_62900000	808.529	656.636	0.2982	4.1986	3.3152	0.7572	0.5765	0.1806	biallelic	Autosomes	.
Arb2a	ENSMUSG00000064138.15	protein_coding	chr13_78300000	1163.26	1206.67	-0.0526	2.1304	2.1486	0.4596	0.6513	-0.1916	biallelic	Autosomes	.
Arc	ENSMUSG00000022602.15	protein_coding	chr15_74500000	82.1891	400.609	-2.2179	20.0382	94.9607	0.6554	0.6041	0.0513	skewed:CAST	Autosomes	.
Arcn1	ENSMUSG00000032096.17	protein_coding	chr9_44650000	1851.42	1575.46	0.2322	59.8907	49.5496	0.9849	0.9894	-0.0046	biallelic	Autosomes	.
Areg	ENSMUSG00000029378.6	protein_coding	chr5_91250000	38.5355	12.6012	1.3065	3.7089	1.1792	0.6106	0.503	0.1076	skewed:B6	Autosomes	.
Arel1	ENSMUSG00000042350.14	protein_coding	chr12_85000000	2211.24	1638.53	0.4313	35.6363	25.6739	0.9856	0.9726	0.013	biallelic	Autosomes	.
Arf1	ENSMUSG00000048076.15	protein_coding	chr11_59100000	3074.6	2815.94	0.1266	155.052	138.068	0.9558	0.852	0.1037	biallelic	Autosomes	.
Arf2	ENSMUSG00000062421.14	protein_coding	chr11_103850000	1584.49	1429.11	0.1484	72.4304	63.5146	0.9105	0.7846	0.1259	biallelic	Autosomes	.
Arf3	ENSMUSG00000051853.11	protein_coding	chr15_98650000	3778.64	3692.09	0.0334	120.858	114.814	0.8796	0.9393	-0.0597	biallelic	Autosomes	.
Arf4	ENSMUSG00000021877.13	protein_coding	chr14_26350000	6881.2	7091.87	-0.0435	216.589	217.026	0.9557	0.9158	0.0398	biallelic	Autosomes	.
Arf4os	ENSMUSG00000090861.3	lncRNA	chr14_26300000	19.3357	21.2358	-0.1085	0.6679	0.7132	0.8279	0.9167	-0.0887	biallelic	Autosomes	.
Arf5	ENSMUSG00000020440.15	protein_coding	chr6_28400000	622.629	733.827	-0.2353	174.007	199.393	0.8046	0.6339	0.1706	biallelic	Autosomes	.
Arfgap1	ENSMUSG00000027575.20	protein_coding	chr2_180600000	1044.41	1127.8	-0.1103	58.0293	60.9238	0.7492	0.9047	-0.1556	biallelic	Autosomes	.
Arfgap2	ENSMUSG00000027255.15	protein_coding	chr2_91050000	2094.65	1857.58	0.1728	148.931	128.41	0.9193	0.8794	0.04	biallelic	Autosomes	.
Arfgap3	ENSMUSG00000054277.9	protein_coding	chr15_83150000	54.7455	52.7504	0.049	0.9215	0.8633	0.9699	0.7915	0.1784	biallelic	Autosomes	.
Arfgef1	ENSMUSG00000067851.12	protein_coding	chr1_10300000	1023.86	1263.41	-0.302	9.1529	10.981	0.5617	0.3252	0.2365	biallelic	Autosomes	.
Arfgef2	ENSMUSG00000074582.11	protein_coding	chr2_166650000	868.629	836.23	0.0545	7.9865	7.4753	0.9142	0.9508	-0.0366	biallelic	Autosomes	.
Arfgef3	ENSMUSG00000019852.8	protein_coding	chr10_18450000	9.75827	17.7785	-0.6261	0.0512	0.0906	0.5696	0.7742	-0.2047	biallelic	Autosomes	.
Arfip1	ENSMUSG00000074513.10	protein_coding	chr3_84450000	121.677	116.893	0.0555	1.1954	1.1166	0.7697	0.8597	-0.09	biallelic	Autosomes	.
Arfip2	ENSMUSG00000030881.16	protein_coding	chr7_105250000	790.454	752.368	0.0708	108.161	100.093	0.6557	0.6824	-0.0267	biallelic	Autosomes	.
Arfrp1	ENSMUSG00000038671.16	protein_coding	chr2_181000000	452.96	335.449	0.4278	49.9202	35.9436	0.7291	0.9977	-0.2685	biallelic	Autosomes	.
Arg2	ENSMUSG00000021125.7	protein_coding	chr12_79200000	0.619607	31.5604	-2.7017	0.0206	1.022	0.9147	0.8257	0.089	mono:CAST	Autosomes	.
Arglu1	ENSMUSG00000040459.12	protein_coding	chr8_8700000	1020.39	1025.04	-0.0065	34.0912	33.2965	0.7553	0.6415	0.1138	biallelic	Autosomes	.
Arhgap1	ENSMUSG00000027247.17	protein_coding	chr2_91450000	1524.62	1320	0.2072	57.6943	48.565	0.7837	0.9656	-0.182	biallelic	Autosomes	.
Arhgap10	ENSMUSG00000037148.9	protein_coding	chr8_78050000	357.481	391.356	-0.1289	1.1358	1.2089	0.6016	0.4807	0.1209	biallelic	Autosomes	.
Arhgap11a	ENSMUSG00000041219.16	protein_coding	chr2_113650000	1385.19	1442.33	-0.0581	68.5899	69.4377	0.7364	0.6521	0.0843	biallelic	Autosomes	.
Arhgap12	ENSMUSG00000041225.17	protein_coding	chr18_6100000	842.855	883.602	-0.0677	6.4167	6.5402	0.8787	0.8028	0.076	biallelic	Autosomes	.
Arhgap17	ENSMUSG00000030766.16	protein_coding	chr7_122950000	416.001	432.435	-0.0552	3.8994	3.941	0.7376	0.9019	-0.1643	biallelic	Autosomes	.
Arhgap18	ENSMUSG00000039031.17	protein_coding	chr10_26650000	1789.97	2375.62	-0.4074	9.21	11.8842	0.6076	0.7262	-0.1186	biallelic	Autosomes	.
Arhgap19	ENSMUSG00000025154.16	protein_coding	chr19_41750000	1301.4	1282.84	0.0206	31.2019	29.9034	0.9484	0.89	0.0584	biallelic	Autosomes	.
Arhgap20	ENSMUSG00000053199.14	protein_coding	chr9_51750000	38.3801	30.5242	0.2882	0.3686	0.285	0.5796	0.7851	-0.2055	biallelic	Autosomes	.
Arhgap21	ENSMUSG00000036591.17	protein_coding	chr2_20850000	3666.59	3817.09	-0.058	25.7697	26.0831	0.5903	0.6818	-0.0914	biallelic	Autosomes	.
Arhgap22	ENSMUSG00000063506.15	protein_coding	chr14_32900000	44.287	52.0191	-0.2102	0.2415	0.2758	0.5851	0.4354	0.1497	biallelic	Autosomes	.
Arhgap23	ENSMUSG00000049807.17	protein_coding	chr11_97300000	439.415	355.954	0.3001	4.3004	3.3869	0.9786	0.8853	0.0933	biallelic	Autosomes	.
Arhgap24	ENSMUSG00000057315.15	protein_coding	chr5_102950000	188.913	211.851	-0.1613	0.3856	0.4204	0.4839	0.8633	-0.3793	biallelic	Autosomes	.
Arhgap26	ENSMUSG00000036452.19	protein_coding	chr18_39300000	151.28	150.202	0.01	0.3357	0.324	0.862	0.6554	0.2066	biallelic	Autosomes	.
Arhgap26	ENSMUSG00000118193.2	lncRNA	chr18_39100000	19.4025	12.129	0.5106	0.038	0.0231	0.8114	0.9751	-0.1637	biallelic	Autosomes	.
Arhgap27	ENSMUSG00000034255.19	protein_coding	chr11_103200000	26.8712	31.2555	-0.1859	0.7096	0.8024	0.8456	0.7757	0.0699	biallelic	Autosomes	.
Arhgap28	ENSMUSG00000024043.14	protein_coding	chr17_68250000	6.75466	29.1233	-1.5375	0.0356	0.1491	0.6039	0.1817	0.4222	skewed:CAST	Autosomes	.
Arhgap29	ENSMUSG00000039831.17	protein_coding	chr3_121800000	605.635	446.505	0.4356	8.0185	5.7476	0.8037	0.726	0.0778	biallelic	Autosomes	.
Arhgap32	ENSMUSG00000041444.15	protein_coding	chr9_32000000	1283.25	1313.53	-0.0335	7.1628	7.1283	0.6422	0.7973	-0.1551	biallelic	Autosomes	.
Arhgap33	ENSMUSG00000036882.8	protein_coding	chr7_30200000	564.04	581.798	-0.0443	37.3632	37.4701	0.9101	0.8039	0.1062	biallelic	Autosomes	.
Arhgap35	ENSMUSG00000058230.14	protein_coding	chr7_16300000	2168.14	1862.16	0.2189	15.199	12.6919	0.7869	0.9853	-0.1983	biallelic	Autosomes	.
Arhgap4	ENSMUSG00000031389.18	protein_coding	chrX_72950000	64.4921	40.8804	0.599	1.8019	1.1105	0.967	0.7549	0.2121	biallelic	X	ESCAPEE
Arhgap42	ENSMUSG00000050730.18	protein_coding	chr9_9200000	1893.96	2080.46	-0.1352	6.5781	7.0253	0.6139	0.7677	-0.1539	biallelic	Autosomes	.
Arhgap44	ENSMUSG00000033389.17	protein_coding	chr11_65050000	302.912	268.023	0.1735	1.6003	1.3767	0.5563	0.3917	0.1646	biallelic	Autosomes	.
Arhgap5	ENSMUSG00000035133.10	protein_coding	chr12_52600000	1864.59	1702.84	0.1306	23.3105	20.6977	0.8578	0.7538	0.104	biallelic	Autosomes	.
Arhgap6	ENSMUSG00000031355.17	protein_coding	chrX_167550000	218.437	0.403536	5.3698	0.3646	0.0007	0.4687	0.0746	0.3941	mono:B6	X	.
Arhgdia	ENSMUSG00000025132.14	protein_coding	chr11_120450000	85.598	122.8	-0.4963	20.6737	28.8357	0.9213	0.9792	-0.058	biallelic	Autosomes	.
Arhgdig	ENSMUSG00000073433.12	protein_coding	chr17_26400000	10.5529	4.84243	0.6601	1.0428	0.4653	0.8227	0.8157	0.0071	biallelic	Autosomes	.
Arhgef1	ENSMUSG00000040940.19	protein_coding	chr7_24600000	1128.15	1214.38	-0.1058	40.4992	42.3848	0.7809	0.7389	0.042	biallelic	Autosomes	.
Arhgef10	ENSMUSG00000071176.11	protein_coding	chr8_15000000	1042.67	930.55	0.1633	9.9128	8.6014	0.9632	0.722	0.2412	biallelic	Autosomes	.
Arhgef10l	ENSMUSG00000040964.17	protein_coding	chr4_140200000	1997.12	2436.46	-0.2862	11.205	13.2906	0.7241	0.8628	-0.1386	biallelic	Autosomes	.
Arhgef11	ENSMUSG00000041977.19	protein_coding	chr3_87600000	923.288	843.203	0.1302	6.5153	5.7851	0.9267	0.7781	0.1487	biallelic	Autosomes	.
Arhgef12	ENSMUSG00000059495.15	protein_coding	chr9_42850000	1585.45	1534.54	0.0469	9.3996	8.8454	0.8142	0.9854	-0.1712	biallelic	Autosomes	.
Arhgef17	ENSMUSG00000032875.9	protein_coding	chr7_100550000	695.775	796.96	-0.1946	9.4862	10.5643	0.9533	0.8312	0.1221	biallelic	Autosomes	.
Arhgef18	ENSMUSG00000004568.14	protein_coding	chr8_3450000	1510.68	1326.29	0.1871	12.4465	10.6241	0.8689	0.6018	0.2671	biallelic	Autosomes	.
Arhgef19	ENSMUSG00000028919.12	protein_coding	chr4_140950000	879.782	516.873	0.7616	41.4031	23.6494	0.9393	0.8352	0.1041	biallelic	Autosomes	.
Arhgef2	ENSMUSG00000028059.17	protein_coding	chr3_88550000	1821.17	1880.31	-0.046	36.7883	36.929	0.9741	0.903	0.0711	biallelic	Autosomes	.
Arhgef25	ENSMUSG00000019467.16	protein_coding	chr10_127000000	1128.33	1216.04	-0.1075	126.919	132.989	0.8596	0.9078	-0.0482	biallelic	Autosomes	.
Arhgef28	ENSMUSG00000021662.12	protein_coding	chr13_98150000	145.509	220.755	-0.5849	0.403	0.5944	0.5556	0.8784	-0.3228	biallelic	Autosomes	.
Arhgef3	ENSMUSG00000021895.11	protein_coding	chr14_26950000	301.879	104.814	1.4826	0.888	0.2998	0.7862	0.9424	-0.1562	skewed:B6	Autosomes	.
Arhgef33	ENSMUSG00000054901.8	protein_coding	chr17_80700000	19.6386	28.5682	-0.4462	0.1802	0.2548	0.9825	0.7631	0.2193	biallelic	Autosomes	.
Arhgef37	ENSMUSG00000045094.9	protein_coding	chr18_61600000	106.468	105.867	0.0078	2.0142	1.9473	0.8275	0.9829	-0.1554	biallelic	Autosomes	.
Arhgef39	ENSMUSG00000051517.15	protein_coding	chr4_43450000	337.992	332.445	0.0235	80.8736	77.3392	0.9585	0.9954	-0.0369	biallelic	Autosomes	.
Arhgef4	ENSMUSG00000037509.22	protein_coding	chr1_34700000	4496.31	8285.77	-0.8812	28.2898	50.6857	0.9337	0.7039	0.2298	biallelic	Autosomes	.
Arhgef40	ENSMUSG00000004562.17	protein_coding	chr14_52200000	1311.71	1316.77	-0.0055	51.7905	50.5478	0.9461	0.9309	0.0152	biallelic	Autosomes	.
Arhgef6	ENSMUSG00000031133.13	protein_coding	chrX_56350000	103.639	0	4.4415	0.8216	0	0.7644	0.458	0.3064	mono:B6	X	.
Arhgef7	ENSMUSG00000031511.17	protein_coding	chr8_11850000	1668.19	1384.9	0.2676	13.193	10.6486	0.8598	0.6795	0.1803	biallelic	Autosomes	.
Arhgef9	ENSMUSG00000025656.18	protein_coding	chrX_94200000	2614.36	2.63444	8.4225	15.0256	0.0147	0.5855	0.8297	-0.2442	mono:B6	X	.
Arid1a	ENSMUSG00000007880.17	protein_coding	chr4_133450000	615.95	670.137	-0.1207	6.7341	7.1232	0.9522	0.8523	0.0999	biallelic	Autosomes	.
Arid1b	ENSMUSG00000069729.15	protein_coding	chr17_5100000	449.878	429.896	0.0648	1.0825	1.0057	0.893	0.5997	0.2933	biallelic	Autosomes	.
Arid2	ENSMUSG00000033237.20	protein_coding	chr15_96200000	1603.01	1555.15	0.0436	11.6009	10.9422	0.9911	0.8399	0.1512	biallelic	Autosomes	.
Arid3a	ENSMUSG00000019564.13	protein_coding	chr10_79750000	16.1904	12.6471	0.264	0.492	0.3737	0.9941	0.9485	0.0456	biallelic	Autosomes	.
Arid3b	ENSMUSG00000004661.16	protein_coding	chr9_57700000	11.7587	4.91115	0.7578	0.2153	0.0874	0.9757	0.9876	-0.0119	skewed:B6	Autosomes	.
Arid4b	ENSMUSG00000039219.19	protein_coding	chr13_14200000	1245.08	1170.73	0.0885	7.762	7.0959	0.8598	0.5386	0.3212	biallelic	Autosomes	.
Arid5a	ENSMUSG00000037447.17	protein_coding	chr1_36350000	191.557	195.723	-0.0303	9.9934	9.9274	0.9528	0.8398	0.113	biallelic	Autosomes	.
Arid5b	ENSMUSG00000019947.11	protein_coding	chr10_68050000	314.246	332.6	-0.0806	1.4346	1.4763	0.8197	0.9341	-0.1145	biallelic	Autosomes	.
Arih1	ENSMUSG00000025234.12	protein_coding	chr9_59300000	1072.79	1155.67	-0.1069	9.2724	9.7116	0.9938	0.7772	0.2166	biallelic	Autosomes	.
Arih2	ENSMUSG00000064145.13	protein_coding	chr9_108450000	989.832	1040.39	-0.0715	18.1187	18.5158	0.9263	0.9466	-0.0203	biallelic	Autosomes	.
Ark2c	ENSMUSG00000025427.16	protein_coding	chr18_77650000	605.724	556.883	0.1203	4.7222	4.2209	0.6172	0.7343	-0.1171	biallelic	Autosomes	.
Ark2n	ENSMUSG00000047466.11	protein_coding	chr18_77700000	347.687	396.211	-0.186	3.5616	3.946	0.6413	0.8042	-0.1628	biallelic	Autosomes	.
Arl1	ENSMUSG00000060904.15	protein_coding	chr10_88550000	1676.04	410.877	2.0151	107.653	25.6584	0.659	0.5655	0.0935	skewed:B6	Autosomes	.
Arl10	ENSMUSG00000025870.11	protein_coding	chr13_54700000	257.106	153.24	0.728	35.7565	20.7201	0.823	0.797	0.026	biallelic	Autosomes	.
Arl13b	ENSMUSG00000022911.12	protein_coding	chr16_62650000	695.59	682.887	0.0264	11.0834	10.5791	0.6125	0.5929	0.0196	biallelic	Autosomes	.
Arl14ep	ENSMUSG00000027122.16	protein_coding	chr2_106750000	1444.05	1145.14	0.3333	103.191	79.56	0.5061	0.4636	0.0425	biallelic	Autosomes	.
Arl15	ENSMUSG00000042348.11	protein_coding	chr13_113900000	493.493	352.454	0.4798	1.1559	0.8026	0.7834	0.5349	0.2485	biallelic	Autosomes	.
Arl16	ENSMUSG00000057594.13	protein_coding	chr11_120350000	601.444	891.054	-0.5632	186.544	268.702	0.9889	0.9526	0.0362	biallelic	Autosomes	.
Arl2	ENSMUSG00000024944.7	protein_coding	chr19_6150000	1424.37	1589.22	-0.1575	168.794	183.104	0.9896	0.9358	0.0538	biallelic	Autosomes	.
Arl2bp	ENSMUSG00000031776.18	protein_coding	chr8_95400000	6092.59	5123.56	0.2497	661.933	541.207	0.867	0.9756	-0.1086	biallelic	Autosomes	.
Arl3	ENSMUSG00000025035.10	protein_coding	chr19_46500000	699.934	624.862	0.1625	14.1335	12.2675	0.8082	0.75	0.0582	biallelic	Autosomes	.
Arl4a	ENSMUSG00000047446.19	protein_coding	chr12_40050000	2394.25	1568.97	0.6082	62.4799	39.8075	0.5508	0.6352	-0.0844	biallelic	Autosomes	.
Arl4c	ENSMUSG00000049866.13	protein_coding	chr1_88600000	587.702	902.211	-0.6141	17.172	25.6301	0.8546	0.8461	0.0085	biallelic	Autosomes	.
Arl4d	ENSMUSG00000034936.3	protein_coding	chr11_101550000	16.9713	22.8042	-0.3397	6.2978	8.2274	0.9429	0.9543	-0.0114	biallelic	Autosomes	.
Arl5a	ENSMUSG00000036093.8	protein_coding	chr2_52250000	2057.82	1918.54	0.1008	64.9149	58.8421	0.6903	0.7613	-0.0709	biallelic	Autosomes	.
Arl5b	ENSMUSG00000017418.15	protein_coding	chr2_15050000	864.423	665.691	0.3744	22.2283	16.643	0.5242	0.5134	0.0108	biallelic	Autosomes	.
Arl5c	ENSMUSG00000038352.16	protein_coding	chr11_97850000	4.06776	18.8904	-1.3976	0.5237	2.3647	0.9646	0.9512	0.0134	skewed:CAST	Autosomes	.
Arl6	ENSMUSG00000022722.19	protein_coding	chr16_59450000	722.424	635.722	0.1831	23.2271	19.8723	0.2399	0.3842	-0.1443	biallelic	Autosomes	.
Arl6ip1	ENSMUSG00000030654.10	protein_coding	chr7_117700000	7715.79	5994.67	0.3639	609.005	460.028	0.8114	0.765	0.0465	biallelic	Autosomes	.
Arl6ip4	ENSMUSG00000029404.16	protein_coding	chr5_124250000	242.59	232.939	0.0574	97.8825	91.3803	0.9845	0.9899	-0.0055	biallelic	Autosomes	.
Arl6ip5	ENSMUSG00000035199.7	protein_coding	chr6_97150000	500.443	491.202	0.0266	18.8037	17.9443	0.903	0.8116	0.0915	biallelic	Autosomes	.
Arl6ip6	ENSMUSG00000026960.7	protein_coding	chr2_53050000	1350.01	1328.13	0.0235	41.7441	39.928	0.7429	0.6369	0.106	biallelic	Autosomes	.
Arl8a	ENSMUSG00000026426.11	protein_coding	chr1_135050000	9480.76	13164.7	-0.4734	853.37	1152.08	0.9058	0.9337	-0.0278	biallelic	Autosomes	.
Arl8b	ENSMUSG00000030105.9	protein_coding	chr6_108750000	2127.48	2333.97	-0.1333	42.881	45.7377	0.6349	0.7386	-0.1037	biallelic	Autosomes	.
Arl9	ENSMUSG00000063820.12	protein_coding	chr5_77150000	22.3727	5.4821	1.3848	2.9034	0.6917	0.6465	0.7758	-0.1293	skewed:B6	Autosomes	.
Armc1	ENSMUSG00000027599.10	protein_coding	chr3_19200000	1443.26	1343.21	0.1033	38.7514	35.0644	0.6732	0.7632	-0.09	biallelic	Autosomes	.
Armc10	ENSMUSG00000038525.17	protein_coding	chr5_21850000	1977.29	947.079	1.058	99.5791	46.3728	0.8447	0.815	0.0297	biallelic	Autosomes	.
Armc2	ENSMUSG00000071324.12	protein_coding	chr10_41850000	125.408	118.241	0.0816	1.0306	0.9447	0.833	0.9547	-0.1217	biallelic	Autosomes	.
Armc5	ENSMUSG00000042178.7	protein_coding	chr7_127800000	386.799	393.269	-0.0236	42.3869	41.9001	0.8592	0.8024	0.0568	biallelic	Autosomes	.
Armc6	ENSMUSG00000002343.12	protein_coding	chr8_70650000	202.06	192.18	0.0705	12.0177	11.113	0.897	0.9004	-0.0034	biallelic	Autosomes	.
Armc7	ENSMUSG00000057219.12	protein_coding	chr11_115350000	36.3738	45.0374	-0.2743	2.0894	2.5153	0.8463	0.9354	-0.0891	biallelic	Autosomes	.
Armc8	ENSMUSG00000032468.12	protein_coding	chr9_99400000	227.759	265.784	-0.2183	2.1389	2.4268	0.8511	0.6777	0.1734	biallelic	Autosomes	.
Armc9	ENSMUSG00000062590.14	protein_coding	chr1_86050000	430.911	621.528	-0.5233	2.9662	4.1596	0.8373	0.9363	-0.099	biallelic	Autosomes	.
Armcx1	ENSMUSG00000033460.15	protein_coding	chrX_133600000	1606.47	71.7183	4.3927	345.407	14.9923	0.8162	0.4834	0.3329	mono:B6	X	.
Armcx2	ENSMUSG00000033436.14	protein_coding	chrX_133700000	2047.05	5.05565	7.6729	342.849	0.8232	0.6958	0.3302	0.3656	mono:B6	X	.
Armcx3	ENSMUSG00000049047.12	protein_coding	chrX_133650000	581.026	0	6.8729	101.638	0	0.8042	0.4605	0.3437	mono:B6	X	.
Armcx4	ENSMUSG00000049804.10	protein_coding	chrX_133550000	1887.48	62.4828	4.8096	156.734	5.0445	0.5733	0.8485	-0.2752	mono:B6	X	.
Armcx6	ENSMUSG00000050394.15	protein_coding	chrX_133650000	341.534	0	6.1149	98.2259	0	0.8042	0.4605	0.3437	mono:B6	X	.
Armh1	ENSMUSG00000060268.13	protein_coding	chr4_117100000	29.1077	21.6623	0.3553	0.6379	0.4616	0.929	0.7521	0.1768	biallelic	Autosomes	.
Armh3	ENSMUSG00000039901.11	protein_coding	chr19_45800000	895.796	938.039	-0.0661	4.2046	4.2808	0.7749	0.9982	-0.2233	biallelic	Autosomes	.
Armh4	ENSMUSG00000036242.16	protein_coding	chr14_50000000	2752.67	2796.72	-0.0229	21.7832	21.5176	0.8296	0.6078	0.2217	biallelic	Autosomes	.
Armt1	ENSMUSG00000061759.16	protein_coding	chr10_4350000	607.935	602.637	0.0125	22.7942	21.9686	0.6849	0.7915	-0.1065	biallelic	Autosomes	.
Arnt	ENSMUSG00000015522.20	protein_coding	chr3_95300000	986.322	957.384	0.0427	13.3412	12.5905	0.9716	0.7797	0.192	biallelic	Autosomes	.
Arnt2	ENSMUSG00000015709.10	protein_coding	chr7_84000000	5029.34	5200.53	-0.0482	26.0876	26.227	0.8887	0.7002	0.1886	biallelic	Autosomes	.
Arpc1a	ENSMUSG00000029621.15	protein_coding	chr5_145000000	1869.48	1975.67	-0.0795	63.7496	65.5012	0.7868	0.7968	-0.01	biallelic	Autosomes	.
Arpc1b	ENSMUSG00000029622.17	protein_coding	chr5_145050000	953.955	657.644	0.5332	49.1817	32.9644	0.847	0.8064	0.0406	biallelic	Autosomes	.
Arpc2	ENSMUSG00000006304.15	protein_coding	chr1_74300000	1183.97	1407.82	-0.2489	31.3324	36.2226	0.875	0.991	-0.116	biallelic	Autosomes	.
Arpc3	ENSMUSG00000029465.15	protein_coding	chr5_122500000	3147.69	3118.66	0.0133	119.968	115.564	0.9927	0.9223	0.0704	biallelic	Autosomes	.
Arpc4	ENSMUSG00000079426.14	protein_coding	chr6_113350000	599.835	615.559	-0.037	41.3484	41.255	0.8744	0.827	0.0474	biallelic	Autosomes	.
Arpc5	ENSMUSG00000008475.14	protein_coding	chr1_152650000	2981.18	4110.92	-0.4629	279.895	375.255	0.9838	0.7977	0.1861	biallelic	Autosomes	.
Arpc5l	ENSMUSG00000026755.15	protein_coding	chr2_38850000	336.529	360.949	-0.0996	27.1726	28.3357	0.6818	0.8439	-0.1622	biallelic	Autosomes	.
Arpin	ENSMUSG00000039043.6	protein_coding	chr7_79550000	686.251	568.984	0.2682	58.3534	47.0394	0.8824	0.8813	0.0011	biallelic	Autosomes	.
Arpp19	ENSMUSG00000007656.15	protein_coding	chr9_74950000	1863.73	1838.42	0.0197	69.8029	66.9443	0.9807	0.864	0.1166	biallelic	Autosomes	.
Arpp21	ENSMUSG00000032503.19	protein_coding	chr9_111900000	18.3383	44.359	-1.0806	0.0913	0.2146	0.3938	0.2385	0.1553	skewed:CAST	Autosomes	.
Arrb1	ENSMUSG00000018909.16	protein_coding	chr7_99150000	998.013	1100.77	-0.1407	11.899	12.7601	0.9201	0.9627	-0.0426	biallelic	Autosomes	.
Arrb2	ENSMUSG00000060216.16	protein_coding	chr11_70300000	250.781	271.925	-0.1146	26.0224	27.4335	0.9291	0.86	0.0691	biallelic	Autosomes	.
Arrdc1	ENSMUSG00000026972.16	protein_coding	chr2_24800000	95.7754	108.449	-0.1709	8.2246	9.0545	0.9669	0.8738	0.0931	biallelic	Autosomes	.
Arrdc2	ENSMUSG00000002910.12	protein_coding	chr8_71250000	360.972	405.925	-0.1671	66.8441	73.0826	0.8992	0.8172	0.082	biallelic	Autosomes	.
Arrdc3	ENSMUSG00000074794.11	protein_coding	chr13_81000000	1394.93	1421.15	-0.0268	93.6881	92.8004	0.4167	0.3455	0.0712	biallelic	Autosomes	.
Arrdc4	ENSMUSG00000042659.16	protein_coding	chr7_68350000	1863.16	2464.1	-0.4024	129.346	166.318	0.4402	0.5382	-0.098	biallelic	Autosomes	.
Arsb	ENSMUSG00000042082.8	protein_coding	chr13_93900000	626.108	210.847	1.5479	3.1058	1.0169	0.5336	0.7401	-0.2065	skewed:B6	Autosomes	.
Arsg	ENSMUSG00000020604.14	protein_coding	chr11_109350000	403.644	690.21	-0.7666	3.4331	5.7075	0.7197	0.9089	-0.1892	biallelic	Autosomes	.
Arsi	ENSMUSG00000036412.6	protein_coding	chr18_61000000	33.3702	58.2325	-0.7207	4.1837	7.0982	0.8138	0.9393	-0.1255	biallelic	Autosomes	.
Art3	ENSMUSG00000034842.17	protein_coding	chr5_92450000	22.3393	5.93144	1.3225	0.2294	0.0592	0.921	0.7397	0.1813	skewed:B6	Autosomes	.
Artn	ENSMUSG00000028539.15	protein_coding	chr4_117750000	1.58933	10.5836	-1.2418	0.3752	2.4293	0.9253	0.9466	-0.0213	skewed:CAST	Autosomes	.
Arv1	ENSMUSG00000031982.6	protein_coding	chr8_125400000	300.715	436.782	-0.5311	21.3329	30.1258	0.892	0.9909	-0.0989	biallelic	Autosomes	.
Arvcf	ENSMUSG00000118669.2	protein_coding	chr16_18200000	1325.29	718.438	0.8788	18.8474	9.9336	0.8889	0.7938	0.095	biallelic	Autosomes	.
Arxes1	ENSMUSG00000048355.3	protein_coding	chrX_134900000	1991.36	2.84766	7.9909	1072.17	1.4907	0.5591	0.367	0.1921	mono:B6	X	.
Arxes2	ENSMUSG00000048040.9	protein_coding	chrX_134850000	5420.47	6.47948	8.8845	3009.94	3.4982	0.7753	0.424	0.3513	mono:B6	X	.
As3mt	ENSMUSG00000003559.9	protein_coding	chr19_46650000	28.5274	682.878	-4.3587	0.7209	16.7783	0.9913	0.87	0.1213	mono:CAST	Autosomes	.
Asah1	ENSMUSG00000031591.15	protein_coding	chr8_41750000	5311.9	4156.76	0.3534	130.608	99.37	0.8688	0.7132	0.1557	biallelic	Autosomes	.
Asap1	ENSMUSG00000022377.17	protein_coding	chr15_64000000	1095.07	1325.15	-0.274	3.1445	3.6996	0.6634	0.8207	-0.1572	biallelic	Autosomes	.
Asap2	ENSMUSG00000052632.17	protein_coding	chr12_21100000	652.619	734.412	-0.1691	1.9836	2.1702	0.7525	0.5724	0.1802	biallelic	Autosomes	.
Asap3	ENSMUSG00000036995.8	protein_coding	chr4_135900000	769.035	608.706	0.3349	16.8283	12.9503	0.9888	0.9007	0.0881	biallelic	Autosomes	.
Asb1	ENSMUSG00000026311.17	protein_coding	chr1_91450000	483.207	813.761	-0.7459	21.5699	35.3176	0.9407	0.9357	0.0049	biallelic	Autosomes	.
Asb13	ENSMUSG00000033781.8	protein_coding	chr13_3650000	613.348	863.788	-0.4906	26.3486	36.0775	0.5499	0.4856	0.0643	biallelic	Autosomes	.
Asb3	ENSMUSG00000020305.14	protein_coding	chr11_30900000	391.067	335.606	0.2176	1.5301	1.2766	0.5154	0.7672	-0.2519	biallelic	Autosomes	.
Asb4	ENSMUSG00000042607.16	protein_coding	chr6_5350000	55.9317	65.3446	-0.2072	0.958	1.0881	0.5396	0.456	0.0836	biallelic	Autosomes	.
Asb5	ENSMUSG00000031519.5	protein_coding	chr8_54950000	45.0955	29.1621	0.5523	0.6577	0.4135	0.5219	0.6249	-0.103	biallelic	Autosomes	.
Asb7	ENSMUSG00000030509.18	protein_coding	chr7_66250000	688.483	591.913	0.2163	12.998	10.8648	0.8277	0.8648	-0.0371	biallelic	Autosomes	.
Asb8	ENSMUSG00000048175.14	protein_coding	chr15_98050000	639.281	611.861	0.0627	17.5386	16.3205	0.658	0.6895	-0.0315	biallelic	Autosomes	.
Asb9	ENSMUSG00000031384.3	protein_coding	chrX_163300000	11.5365	0	1.7257	0.2934	0	0.3269	0.3791	-0.0522	mono:B6	X	.
Ascc1	ENSMUSG00000044475.15	protein_coding	chr10_59800000	417.427	434.797	-0.0581	3.6516	3.698	0.9371	0.885	0.0521	biallelic	Autosomes	.
Ascc2	ENSMUSG00000020412.17	protein_coding	chr11_4550000	1121.05	969.55	0.2085	19.8753	16.7124	0.9533	0.9832	-0.0299	biallelic	Autosomes	.
Ascc3	ENSMUSG00000038774.10	protein_coding	chr10_50500000	370.46	411.977	-0.1513	1.2169	1.3157	0.4557	0.323	0.1327	biallelic	Autosomes	.
Ascl1	ENSMUSG00000020052.10	protein_coding	chr10_87300000	1451.55	1278.87	0.1821	434.368	372.074	0.7872	0.698	0.0892	biallelic	Autosomes	.
Asf1a	ENSMUSG00000019857.8	protein_coding	chr10_53450000	543.172	531.997	0.0297	37.0371	35.2686	0.6821	0.5019	0.1802	biallelic	Autosomes	.
Asgr1	ENSMUSG00000020884.16	protein_coding	chr11_69900000	1.01694	9.63198	-1.282	0.227	2.0902	0.8961	0.7802	0.1159	mono:CAST	Autosomes	.
Ash1l	ENSMUSG00000028053.14	protein_coding	chr3_88850000	1402.8	1298.37	0.1112	9.2627	8.3352	0.9972	0.8691	0.1281	biallelic	Autosomes	.
Ash2l	ENSMUSG00000031575.19	protein_coding	chr8_26300000	489.418	497.492	-0.0234	13.1263	12.9727	0.9652	0.9145	0.0507	biallelic	Autosomes	.
Asic1	ENSMUSG00000023017.11	protein_coding	chr15_99550000	869.383	721.236	0.2678	24.0266	19.3793	0.9724	0.9094	0.063	biallelic	Autosomes	.
Asic4	ENSMUSG00000033007.16	protein_coding	chr1_75400000	11.267	28.1189	-1.0257	0.4007	0.9722	0.8915	0.9227	-0.0311	skewed:CAST	Autosomes	.
Asl	ENSMUSG00000025533.16	protein_coding	chr5_130000000	455.288	478.512	-0.071	21.5167	21.9868	0.8269	0.9579	-0.131	biallelic	Autosomes	.
Asns	ENSMUSG00000029752.13	protein_coding	chr6_7650000	1638.68	1491.08	0.1357	77.0323	68.1488	0.4217	0.3673	0.0543	biallelic	Autosomes	.
Aspa	ENSMUSG00000020774.10	protein_coding	chr11_73200000	42.5895	61.8185	-0.4896	1.4716	2.0768	0.7226	0.6202	0.1023	biallelic	Autosomes	.
Aspdh	ENSMUSG00000038704.13	protein_coding	chr7_44100000	113.266	84.1979	0.407	40.6816	29.4021	0.7641	0.7867	-0.0227	biallelic	Autosomes	.
Asph	ENSMUSG00000028207.19	protein_coding	chr4_9650000	4593.15	4245.95	0.1133	17.6471	15.8605	0.55	0.8559	-0.306	biallelic	Autosomes	.
Asphd2	ENSMUSG00000029348.12	protein_coding	chr5_112500000	252.054	272.869	-0.1123	20.3847	21.4558	0.962	0.9661	-0.0041	biallelic	Autosomes	.
Aspm	ENSMUSG00000033952.15	protein_coding	chr1_139400000	1845.19	2624.92	-0.5073	39.8964	55.1809	0.5053	0.3336	0.1718	biallelic	Autosomes	.
Asrgl1	ENSMUSG00000024654.9	protein_coding	chr19_9100000	2720.87	1618.96	0.7472	89.7683	51.9313	0.6206	0.4995	0.1211	biallelic	Autosomes	.
Ass1	ENSMUSG00000076441.10	protein_coding	chr2_31350000	38.9052	31.1639	0.2798	0.6554	0.5104	0.9383	0.979	-0.0408	biallelic	Autosomes	.
Aste1	ENSMUSG00000032567.17	protein_coding	chr9_105250000	227.104	169.092	0.4149	11.4672	8.3011	0.4698	0.3221	0.1478	biallelic	Autosomes	.
Astn1	ENSMUSG00000026587.16	protein_coding	chr1_158300000	7020.43	8214.73	-0.2265	18.1132	20.6064	0.6841	0.4657	0.2184	biallelic	Autosomes	.
Astn2	ENSMUSG00000028373.17	protein_coding	chr4_65700000	575.296	624.205	-0.1167	0.4777	0.5039	0.3901	0.6891	-0.299	biallelic	Autosomes	.
Asxl1	ENSMUSG00000042548.15	protein_coding	chr2_153150000	1136.41	975.011	0.2199	16.6063	13.8524	0.9611	0.7744	0.1867	biallelic	Autosomes	.
Asxl2	ENSMUSG00000037486.19	protein_coding	chr12_3500000	1005.62	894.756	0.1676	10.6873	9.2452	0.8373	0.5914	0.2459	biallelic	Autosomes	.
Asxl3	ENSMUSG00000045215.19	protein_coding	chr18_22600000	137.985	186.146	-0.4188	0.6315	0.8282	0.1627	0.6435	-0.4808	biallelic	Autosomes	.
Atad1	ENSMUSG00000013662.7	protein_coding	chr19_32600000	3566.91	3369.91	0.0818	44.4974	40.8734	0.6839	0.6046	0.0793	biallelic	Autosomes	.
Atad2	ENSMUSG00000022360.9	protein_coding	chr15_57950000	676.132	566.6	0.2529	14.0069	11.4121	0.89	0.7476	0.1424	biallelic	Autosomes	.
Atad2b	ENSMUSG00000052812.6	protein_coding	chr12_5000000	897.314	970.03	-0.1118	5.8662	6.1657	0.6317	0.7641	-0.1324	biallelic	Autosomes	.
Atad3a	ENSMUSG00000029036.19	protein_coding	chr4_155800000	1879.95	1734.1	0.1162	78.1462	70.0832	0.8627	0.9439	-0.0812	biallelic	Autosomes	.
Atad3aos	ENSMUSG00000054514.6	lncRNA	chr4_155850000	30.5082	33.4794	-0.1159	3.1626	3.3743	0.8323	0.9973	-0.165	biallelic	Autosomes	.
Atad5	ENSMUSG00000017550.15	protein_coding	chr11_80000000	528.06	508.323	0.0544	9.6765	9.0564	0.861	0.9775	-0.1165	biallelic	Autosomes	.
Atf1	ENSMUSG00000023027.14	protein_coding	chr15_100100000	363.883	412.336	-0.178	9.2552	10.1966	0.9671	0.7841	0.183	biallelic	Autosomes	.
Atf2	ENSMUSG00000027104.19	protein_coding	chr2_73650000	497.434	397.153	0.3212	5.5549	4.312	0.8571	0.9944	-0.1372	biallelic	Autosomes	.
Atf3	ENSMUSG00000026628.14	protein_coding	chr1_190900000	51.1913	102.221	-0.9322	0.9116	1.7697	0.8394	0.9833	-0.1439	biallelic	Autosomes	.
Atf4	ENSMUSG00000042406.9	protein_coding	chr15_80100000	1640.78	1580.73	0.0536	591.817	554.338	0.9342	0.9299	0.0042	biallelic	Autosomes	.
Atf5	ENSMUSG00000038539.16	protein_coding	chr7_44450000	445.982	483.161	-0.1143	86.1318	90.7229	0.9604	0.9279	0.0324	biallelic	Autosomes	.
Atf6	ENSMUSG00000026663.7	protein_coding	chr1_170500000	1132.84	1656.59	-0.5463	5.905	8.3955	0.6362	0.8051	-0.1689	biallelic	Autosomes	.
Atf6b	ENSMUSG00000015461.16	protein_coding	chr17_34850000	406.693	388.395	0.0656	43.6113	40.4935	0.9224	0.9256	-0.0032	biallelic	Autosomes	.
Atf7ip	ENSMUSG00000030213.13	protein_coding	chr6_136450000	823.492	2421.35	-1.5502	6.687	19.1164	0.9379	0.6247	0.3132	skewed:CAST	Autosomes	.
Atf7ip2	ENSMUSG00000039200.17	protein_coding	chr16_10000000	3.576	15.4489	-1.2536	0.0517	0.2173	0.3169	0.4374	-0.1205	skewed:CAST	Autosomes	.
Atg10	ENSMUSG00000021619.7	protein_coding	chr13_91300000	272.56	388.099	-0.5021	0.8029	1.1115	0.3373	0.6845	-0.3471	biallelic	Autosomes	.
Atg101	ENSMUSG00000037204.8	protein_coding	chr15_101150000	165.667	204.311	-0.2945	21.1062	25.3072	0.9479	0.8898	0.0581	biallelic	Autosomes	.
Atg12	ENSMUSG00000032905.6	protein_coding	chr18_46850000	1811.55	2075.44	-0.1957	134.671	150.007	0.7041	0.8733	-0.1693	biallelic	Autosomes	.
Atg13	ENSMUSG00000027244.15	protein_coding	chr2_91500000	576.983	582.922	-0.0146	13.6415	13.3996	0.9487	0.9995	-0.0508	biallelic	Autosomes	.
Atg14	ENSMUSG00000037526.8	protein_coding	chr14_47750000	446.175	422.814	0.0767	12.7476	11.7449	0.8013	0.724	0.0773	biallelic	Autosomes	.
Atg16l1	ENSMUSG00000026289.16	protein_coding	chr1_87700000	514.906	645.162	-0.3225	11.9741	14.5868	0.8756	0.9774	-0.1018	biallelic	Autosomes	.
Atg16l2	ENSMUSG00000047767.18	protein_coding	chr7_100950000	368.085	538.609	-0.5431	7.9794	11.3521	0.8981	0.9581	-0.06	biallelic	Autosomes	.
Atg2a	ENSMUSG00000024773.16	protein_coding	chr19_6250000	561.866	566.319	-0.0113	23.1127	22.6495	0.9697	0.9077	0.0619	biallelic	Autosomes	.
Atg2b	ENSMUSG00000041341.11	protein_coding	chr12_105600000	841.423	630.372	0.4138	10.3559	7.5431	0.8346	0.5382	0.2963	biallelic	Autosomes	.
Atg3	ENSMUSG00000022663.4	protein_coding	chr16_45000000	123.52	161.525	-0.3738	3.5294	4.4873	0.6616	0.5541	0.1075	biallelic	Autosomes	.
Atg4a	ENSMUSG00000079418.6	protein_coding	chrX_139900000	427.016	252.171	0.7484	4.0512	2.326	0.6855	0.7246	-0.0391	biallelic	X	ESCAPEE
Atg4b	ENSMUSG00000026280.18	protein_coding	chr1_93700000	1044.1	1497.66	-0.5184	22.696	31.6519	0.6926	0.8754	-0.1828	biallelic	Autosomes	.
Atg4c	ENSMUSG00000028550.16	protein_coding	chr4_99050000	358.259	332.952	0.1042	4.6251	4.1791	0.7628	0.9761	-0.2133	biallelic	Autosomes	.
Atg4d	ENSMUSG00000002820.7	protein_coding	chr9_21150000	403.464	357.506	0.1722	27.4866	23.6798	0.9587	0.9723	-0.0136	biallelic	Autosomes	.
Atg7	ENSMUSG00000030314.17	protein_coding	chr6_114750000	709.698	870.051	-0.292	2.7738	3.3062	0.7978	0.9668	-0.169	biallelic	Autosomes	.
Atg9a	ENSMUSG00000033124.17	protein_coding	chr1_75150000	383.177	532.528	-0.4696	28.7366	38.8291	0.9734	0.8145	0.1588	biallelic	Autosomes	.
Atg9b	ENSMUSG00000038295.15	protein_coding	chr5_24550000	5.21255	4.86534	0.0499	0.5566	0.5051	0.9886	0.9699	0.0187	biallelic	Autosomes	.
Atic	ENSMUSG00000026192.14	protein_coding	chr1_71600000	2283.07	3578.26	-0.6471	86.3375	131.562	0.7005	0.5776	0.1229	biallelic	Autosomes	.
Atl1	ENSMUSG00000021066.10	protein_coding	chr12_70000000	90.7633	118.856	-0.3711	1.0455	1.3311	0.907	0.835	0.0721	biallelic	Autosomes	.
Atl2	ENSMUSG00000059811.14	protein_coding	chr17_80150000	319.807	383.831	-0.2596	5.6959	6.6466	0.6883	0.8948	-0.2066	biallelic	Autosomes	.
Atl3	ENSMUSG00000024759.15	protein_coding	chr19_7500000	1387.53	1316.63	0.0754	25.8494	23.848	0.8935	0.7798	0.1136	biallelic	Autosomes	.
Atm	ENSMUSG00000034218.17	protein_coding	chr9_53350000	990.125	850.286	0.2185	8.6253	7.2016	0.6783	0.5941	0.0842	biallelic	Autosomes	.
Atmin	ENSMUSG00000047388.11	protein_coding	chr8_117650000	858.478	938.152	-0.1273	42.8006	45.475	0.7559	0.5856	0.1704	biallelic	Autosomes	.
Atoh8	ENSMUSG00000037621.9	protein_coding	chr6_72200000	123.73	158.877	-0.3483	3.5779	4.4667	0.9673	0.8984	0.0689	biallelic	Autosomes	.
Atosa	ENSMUSG00000034858.18	protein_coding	chr9_74850000	2043.02	2289.17	-0.1637	21.8214	23.7721	0.7753	0.6803	0.095	biallelic	Autosomes	.
Atosb	ENSMUSG00000036002.13	protein_coding	chr4_43000000	1386.31	1354.21	0.0337	85.3665	81.0761	0.7482	0.8695	-0.1212	biallelic	Autosomes	.
Atox1	ENSMUSG00000018585.10	protein_coding	chr11_55300000	1672.96	1612.23	0.0532	97.4292	91.2871	0.8179	0.7888	0.0291	biallelic	Autosomes	.
Atp10a	ENSMUSG00000025324.9	protein_coding	chr7_58400000	96.8294	117.156	-0.2626	0.4751	0.5589	0.8971	0.5099	0.3872	biallelic	Autosomes	.
Atp10d	ENSMUSG00000046808.19	protein_coding	chr5_72350000	54.1259	407.415	-2.8022	0.4821	3.5282	0.503	0.6713	-0.1683	skewed:CAST	Autosomes	.
Atp11a	ENSMUSG00000031441.16	protein_coding	chr8_12850000	1350.14	1065.64	0.34	10.2746	7.8846	0.7938	0.9869	-0.193	biallelic	Autosomes	.
Atp11b	ENSMUSG00000037400.18	protein_coding	chr3_35900000	1256.56	1088.23	0.2066	10.4557	8.8039	0.6027	0.7414	-0.1387	biallelic	Autosomes	.
Atp11c	ENSMUSG00000062949.14	protein_coding	chrX_59350000	804.071	3.03797	6.6533	1.8593	0.0068	0.4743	0.9016	-0.4273	mono:B6	X	.
Atp13a1	ENSMUSG00000031862.12	protein_coding	chr8_70200000	415.743	421.022	-0.018	21.3098	20.9816	0.8104	0.7315	0.0789	biallelic	Autosomes	.
Atp13a2	ENSMUSG00000036622.16	protein_coding	chr4_140700000	3049.41	3168.31	-0.0551	126.727	128.015	0.9352	0.9872	-0.052	biallelic	Autosomes	.
Atp13a3	ENSMUSG00000022533.15	protein_coding	chr16_30150000	2484.07	2827.8	-0.1866	22.5739	24.9845	0.9873	0.7486	0.2387	biallelic	Autosomes	.
Atp13a4	ENSMUSG00000038094.16	protein_coding	chr16_29250000	18.7023	4.65212	1.2961	0.1067	0.0258	0.353	0.4674	-0.1144	skewed:B6	Autosomes	.
Atp1a1	ENSMUSG00000033161.11	protein_coding	chr3_101500000	2770.04	4087.89	-0.5606	82.7316	118.704	0.9091	0.7257	0.1834	biallelic	Autosomes	.
Atp1a2	ENSMUSG00000007097.15	protein_coding	chr1_172100000	8595.67	14416.5	-0.7457	277.276	452.141	0.9343	0.6753	0.259	biallelic	Autosomes	.
Atp1a3	ENSMUSG00000040907.16	protein_coding	chr7_24650000	107.626	36.7076	1.4332	3.2924	1.0918	0.7603	0.9417	-0.1814	skewed:B6	Autosomes	.
Atp1b1	ENSMUSG00000026576.13	protein_coding	chr1_164250000	335.086	309.609	0.1123	13.4084	12.0451	0.6799	0.6431	0.0368	biallelic	Autosomes	.
Atp1b2	ENSMUSG00000041329.14	protein_coding	chr11_69450000	3105.53	3314.5	-0.0938	425.422	441.449	0.9923	0.9854	0.0069	biallelic	Autosomes	.
Atp1b3	ENSMUSG00000032412.9	protein_coding	chr9_96200000	1507.88	1857.74	-0.3001	40.3288	48.307	0.8807	0.7935	0.0872	biallelic	Autosomes	.
Atp23	ENSMUSG00000025436.13	protein_coding	chr10_126700000	324.36	393.868	-0.2762	8.3745	9.8869	0.6434	0.5079	0.1355	biallelic	Autosomes	.
Atp2a1	ENSMUSG00000030730.13	protein_coding	chr7_126050000	5.13191	8.61169	-0.4259	0.2529	0.4126	0.8384	0.8747	-0.0363	biallelic	Autosomes	.
Atp2a2	ENSMUSG00000029467.16	protein_coding	chr5_122600000	5348.74	5070.61	0.077	93.3494	86.0398	0.9143	0.8813	0.033	biallelic	Autosomes	.
Atp2b1	ENSMUSG00000019943.11	protein_coding	chr10_98750000	2042.68	3076.48	-0.5896	15.5418	22.7579	0.6404	0.55	0.0903	biallelic	Autosomes	.
Atp2b2	ENSMUSG00000030302.18	protein_coding	chr6_113750000	1.41427	13.7361	-1.5465	0.004	0.038	0.863	0.6058	0.2572	mono:CAST	Autosomes	.
Atp2b3	ENSMUSG00000031376.16	protein_coding	chrX_72550000	25.4431	0	2.6061	0.3185	0	0.9269	0.7635	0.1634	mono:B6	X	.
Atp2b4	ENSMUSG00000026463.18	protein_coding	chr1_133700000	346.306	324.237	0.0936	2.8982	2.6382	0.8498	0.9853	-0.1355	biallelic	Autosomes	.
Atp2c1	ENSMUSG00000032570.18	protein_coding	chr9_105350000	2613.28	2193.84	0.2519	17.9487	14.6497	0.7055	0.5524	0.153	biallelic	Autosomes	.
Atp4a	ENSMUSG00000005553.15	protein_coding	chr7_30400000	35.1346	34.979	0.0056	2.2416	2.1698	0.6407	0.9061	-0.2654	biallelic	Autosomes	.
Atp5f1a	ENSMUSG00000025428.16	protein_coding	chr18_77850000	9880.4	10240.3	-0.0516	919.019	926.069	0.7816	0.7175	0.0641	biallelic	Autosomes	.
Atp5f1b	ENSMUSG00000025393.13	protein_coding	chr10_127900000	9199.77	8601.22	0.097	1098.79	998.797	0.9032	0.6664	0.2368	biallelic	Autosomes	.
Atp5f1c	ENSMUSG00000025781.15	protein_coding	chr2_10050000	4641.62	4190.65	0.1473	161.104	141.415	0.7696	0.7615	0.0081	biallelic	Autosomes	.
Atp5f1d	ENSMUSG00000003072.16	protein_coding	chr10_79950000	2733.89	2226.68	0.2955	323.438	256.121	0.9863	0.9918	-0.0055	biallelic	Autosomes	.
Atp5f1e	ENSMUSG00000016252.8	protein_coding	chr2_174300000	3361.95	2344.16	0.5193	942.355	638.837	0.4971	0.5245	-0.0274	biallelic	Autosomes	.
Atp5if1	ENSMUSG00000054428.13	protein_coding	chr4_132250000	5395.78	5648.75	-0.066	1477.85	1504.2	0.9944	0.8745	0.1199	biallelic	Autosomes	.
Atp5mc1	ENSMUSG00000006057.17	protein_coding	chr11_95950000	1427	2879.1	-1.0101	177.935	349.04	0.9056	0.9641	-0.0586	biallelic	Autosomes	.
Atp5mc2	ENSMUSG00000062683.12	protein_coding	chr15_102550000	659.423	3120.4	-2.2339	59.0862	271.839	0.8986	0.7252	0.1734	skewed:CAST	Autosomes	.
Atp5mc3	ENSMUSG00000018770.10	protein_coding	chr2_73700000	3898.62	3412.94	0.1917	1151.24	979.856	0.8139	0.8502	-0.0363	biallelic	Autosomes	.
Atp5me	ENSMUSG00000050856.17	protein_coding	chr5_108550000	290.957	354.072	-0.2789	205.446	243.075	0.5877	0.5569	0.0308	biallelic	Autosomes	.
Atp5mf	ENSMUSG00000038690.16	protein_coding	chr5_145100000	2587.63	2725.98	-0.075	263.017	269.392	0.6998	0.7261	-0.0264	biallelic	Autosomes	.
Atp5mg	ENSMUSG00000038717.10	protein_coding	chr9_44800000	50.6247	53.6791	-0.0771	5.2582	5.4208	0.9082	0.8609	0.0473	biallelic	Autosomes	.
Atp5mj	ENSMUSG00000021290.7	protein_coding	chr12_111900000	2133.21	2319.79	-0.1207	323.733	342.279	0.6454	0.751	-0.1057	biallelic	Autosomes	.
Atp5mk	ENSMUSG00000071528.5	protein_coding	chr19_47050000	2330.77	2254.69	0.0478	275.861	259.451	0.9638	0.775	0.1889	biallelic	Autosomes	.
Atp5pb	ENSMUSG00000000563.18	protein_coding	chr3_105850000	6701.03	6486.36	0.0469	327.389	308.108	0.6918	0.608	0.0838	biallelic	Autosomes	.
Atp5pd	ENSMUSG00000034566.11	protein_coding	chr11_115300000	2473.95	1062.51	1.2155	492.215	205.53	0.9888	0.7961	0.1927	skewed:B6	Autosomes	.
Atp5pf	ENSMUSG00000022890.14	protein_coding	chr16_84600000	1912.92	2556.62	-0.4175	209.598	272.355	0.745	0.6731	0.0719	biallelic	Autosomes	.
Atp5po	ENSMUSG00000022956.12	protein_coding	chr16_91700000	2120.1	2091.51	0.0195	278.45	267.072	0.8575	0.8174	0.0402	biallelic	Autosomes	.
Atp5po	ENSMUSG00000116933.2	protein_coding	chr16_91500000	55.5482	104.62	-0.8564	0.1947	0.3565	0.9225	0.8531	0.0693	biallelic	Autosomes	.
Atp6ap1	ENSMUSG00000019087.14	protein_coding	chrX_73300000	89.8743	92.8079	-0.0439	10.0219	10.0618	0.9343	0.7588	0.1755	biallelic	X	ESCAPEE
Atp6ap2	ENSMUSG00000031007.3	protein_coding	chrX_12450000	2842.15	1161.19	1.2877	82.6128	32.8158	0.9227	0.7286	0.1941	skewed:B6	X	ESCAPEE
Atp6v0a1	ENSMUSG00000019302.18	protein_coding	chr11_100950000	2874.7	3177.69	-0.1443	45.0353	48.4006	0.8844	0.9207	-0.0363	biallelic	Autosomes	.
Atp6v0a2	ENSMUSG00000038023.13	protein_coding	chr5_124800000	2034.13	1846.54	0.1392	49.5819	43.7604	0.9129	0.8176	0.0952	biallelic	Autosomes	.
Atp6v0a4	ENSMUSG00000038600.13	protein_coding	chr6_38050000	2.03388	85.005	-3.6776	0.0227	0.9232	0.9291	0.7952	0.134	mono:CAST	Autosomes	.
Atp6v0b	ENSMUSG00000033379.14	protein_coding	chr4_117700000	1010.54	927.178	0.1236	285.704	254.862	0.8595	0.9425	-0.083	biallelic	Autosomes	.
Atp6v0c	ENSMUSG00000024121.14	protein_coding	chr17_24350000	2053.91	2214.8	-0.1085	299.2	313.686	0.9509	0.9793	-0.0283	biallelic	Autosomes	.
Atp6v0d1	ENSMUSG00000013160.8	protein_coding	chr8_106250000	1414.64	1516.78	-0.1002	28.9225	30.1504	0.9118	0.8488	0.063	biallelic	Autosomes	.
Atp6v0e	ENSMUSG00000015575.16	protein_coding	chr17_26850000	1188.25	957.393	0.3102	27.7403	21.7307	0.9732	0.9043	0.069	biallelic	Autosomes	.
Atp6v0e2	ENSMUSG00000039347.8	protein_coding	chr6_48500000	6251.98	7661.5	-0.2931	1269.74	1512.83	0.8694	0.7777	0.0918	biallelic	Autosomes	.
Atp6v1a	ENSMUSG00000052459.14	protein_coding	chr16_43900000	5322.23	5607.43	-0.0752	83.3231	85.3523	0.7876	0.9704	-0.1827	biallelic	Autosomes	.
Atp6v1b1	ENSMUSG00000006269.8	protein_coding	chr6_83700000	7.29364	5.74113	0.1948	0.3908	0.2991	0.8747	0.8209	0.0539	biallelic	Autosomes	.
Atp6v1c1	ENSMUSG00000022295.9	protein_coding	chr15_38650000	533.974	509.431	0.0672	14.8776	13.7999	0.7778	0.8632	-0.0854	biallelic	Autosomes	.
Atp6v1d	ENSMUSG00000021114.10	protein_coding	chr12_78850000	1267.97	1054.52	0.2648	51.5454	41.6787	0.8222	0.6704	0.1518	biallelic	Autosomes	.
Atp6v1e1	ENSMUSG00000019210.11	protein_coding	chr6_120750000	2514.25	2459.9	0.0315	75.0313	71.3725	0.8508	0.6427	0.208	biallelic	Autosomes	.
Atp6v1f	ENSMUSG00000004285.13	protein_coding	chr6_29450000	2356.49	2021.08	0.221	717.028	597.905	0.98	0.9269	0.0531	biallelic	Autosomes	.
Atp6v1g1	ENSMUSG00000039105.7	protein_coding	chr4_63450000	2521.95	3069.91	-0.2831	358.655	424.468	0.6833	0.6738	0.0095	biallelic	Autosomes	.
Atp6v1h	ENSMUSG00000033793.13	protein_coding	chr1_5100000	393.739	469.081	-0.2497	3.6184	4.1911	0.6133	0.4316	0.1817	biallelic	Autosomes	.
Atp7a	ENSMUSG00000033792.13	protein_coding	chrX_105050000	221.903	155.811	0.4967	1.9319	1.3189	0.8254	0.7584	0.067	biallelic	X	ESCAPEE
Atp7b	ENSMUSG00000006567.12	protein_coding	chr8_22500000	628.096	778.197	-0.3069	7.9084	9.5265	0.5248	0.6803	-0.1555	biallelic	Autosomes	.
Atp8a1	ENSMUSG00000037685.16	protein_coding	chr5_67850000	2424.78	2076.01	0.2235	8.9903	7.4836	0.5834	0.3744	0.209	biallelic	Autosomes	.
Atp8a2	ENSMUSG00000021983.17	protein_coding	chr14_59950000	7.59654	5.86273	0.2136	0.0116	0.0087	0.2758	0.5886	-0.3127	biallelic	Autosomes	.
Atp8b1	ENSMUSG00000039529.10	protein_coding	chr18_64700000	7.69097	8.96942	-0.1385	0.0494	0.056	0.442	0.5875	-0.1455	biallelic	Autosomes	.
Atp8b2	ENSMUSG00000060671.13	protein_coding	chr3_89800000	579.779	644.79	-0.1521	20.5144	22.1817	0.9683	0.913	0.0552	biallelic	Autosomes	.
Atp8b5	ENSMUSG00000028457.19	protein_coding	chr4_43250000	23.787	0	2.5254	0.1896	0	0.6184	0.9139	-0.2955	mono:B6	Autosomes	.
Atp9a	ENSMUSG00000027546.16	protein_coding	chr2_168500000	908.65	1015.34	-0.1593	7.1546	7.7729	0.962	0.6822	0.2798	biallelic	Autosomes	.
Atp9b	ENSMUSG00000024566.11	protein_coding	chr18_80900000	1162.71	921.147	0.3344	4.9444	3.8085	0.8938	0.6277	0.2661	biallelic	Autosomes	.
Atpaf1	ENSMUSG00000028710.19	protein_coding	chr4_115600000	245.47	278.954	-0.181	5.5145	6.0929	0.589	0.7315	-0.1425	biallelic	Autosomes	.
Atpaf2	ENSMUSG00000042709.17	protein_coding	chr11_60250000	430.97	502.24	-0.2184	20.5479	23.2815	0.8689	0.9329	-0.0641	biallelic	Autosomes	.
Atpsckmt	ENSMUSG00000039065.12	protein_coding	chr15_31600000	482.179	671.33	-0.4733	21.1574	28.6398	0.6931	0.6148	0.0783	biallelic	Autosomes	.
Atr	ENSMUSG00000032409.16	protein_coding	chr9_95750000	146.24	151.19	-0.0465	1.32	1.3269	0.6302	0.5062	0.1241	biallelic	Autosomes	.
Atraid	ENSMUSG00000013622.16	protein_coding	chr5_31200000	1025.38	691.137	0.5657	138.129	90.5192	0.8691	0.9986	-0.1295	biallelic	Autosomes	.
Atrip	ENSMUSG00000025646.10	protein_coding	chr9_108850000	517.362	501.022	0.0459	27.1655	25.5775	0.7997	0.9474	-0.1477	biallelic	Autosomes	.
Atrn	ENSMUSG00000027312.15	protein_coding	chr2_130750000	2303.22	2412.18	-0.0665	15.8117	16.1002	0.9454	0.896	0.0493	biallelic	Autosomes	.
Atrnl1	ENSMUSG00000054843.10	protein_coding	chr19_57950000	709.51	700.66	0.018	1.1549	1.1088	0.9571	0.8468	0.1102	biallelic	Autosomes	.
Atrx	ENSMUSG00000031229.17	protein_coding	chrX_104950000	4422.64	3.86795	8.9637	28.53	0.0243	0.9664	0.7088	0.2576	mono:B6	X	.
Atxn1	ENSMUSG00000046876.17	protein_coding	chr13_45900000	324.223	240.698	0.4222	0.6638	0.4791	0.9788	0.8378	0.141	biallelic	Autosomes	.
Atxn10	ENSMUSG00000016541.11	protein_coding	chr15_85250000	1382.03	1355.74	0.0276	9.2539	8.8259	0.9914	0.8388	0.1526	biallelic	Autosomes	.
Atxn1l	ENSMUSG00000069895.5	protein_coding	chr8_110450000	621.699	720.083	-0.2104	46.823	52.7279	0.8041	0.8835	-0.0794	biallelic	Autosomes	.
Atxn2	ENSMUSG00000042605.17	protein_coding	chr5_121900000	370.773	348.701	0.0873	2.9976	2.7409	0.8059	0.9806	-0.1746	biallelic	Autosomes	.
Atxn2l	ENSMUSG00000032637.16	protein_coding	chr7_126100000	845.887	836.3	0.0163	61.3123	58.9354	0.9776	0.9404	0.0372	biallelic	Autosomes	.
Atxn3	ENSMUSG00000021189.12	protein_coding	chr12_101900000	716.635	680.701	0.0737	15.4848	14.3002	0.7449	0.605	0.1399	biallelic	Autosomes	.
Atxn7	ENSMUSG00000021738.6	protein_coding	chr14_8450000	437.156	393.812	0.1488	2.5479	2.2316	0.711	0.8517	-0.1407	biallelic	Autosomes	.
Atxn7l1	ENSMUSG00000020564.18	protein_coding	chr12_33350000	174.479	201.033	-0.1991	0.6578	0.7369	0.9373	0.7234	0.2138	biallelic	Autosomes	.
Atxn7l2	ENSMUSG00000048997.18	protein_coding	chr3_108100000	269.033	258.721	0.0553	26.2533	24.5465	0.9464	0.8703	0.076	biallelic	Autosomes	.
Atxn7l3	ENSMUSG00000059995.13	protein_coding	chr11_102150000	544.594	569.512	-0.064	63.1547	64.2118	0.8501	0.9721	-0.122	biallelic	Autosomes	.
Atxn7l3b	ENSMUSG00000074748.4	protein_coding	chr10_112750000	17.9548	8740.75	-8.5736	4.2745	2023.18	0.001	0.2575	-0.2565	mono:CAST	Autosomes	.
Auh	ENSMUSG00000021460.18	protein_coding	chr13_53050000	931.029	972.611	-0.0627	8.3703	8.5015	0.9745	0.772	0.2025	biallelic	Autosomes	.
Aunip	ENSMUSG00000078521.3	protein_coding	chr4_134200000	86.8961	46.019	0.849	5.7143	2.9423	0.8153	0.9927	-0.1775	biallelic	Autosomes	.
Aup1	ENSMUSG00000068328.11	protein_coding	chr6_83000000	678.64	761.195	-0.1645	175.524	191.413	0.8682	0.6929	0.1753	biallelic	Autosomes	.
Aurka	ENSMUSG00000027496.16	protein_coding	chr2_172150000	370.264	375.808	-0.0212	21.9436	21.6541	0.7481	0.4964	0.2517	biallelic	Autosomes	.
Aurkaip1	ENSMUSG00000065990.13	protein_coding	chr4_155900000	1378.21	1383.05	-0.005	630.618	615.273	0.9595	0.9278	0.0317	biallelic	Autosomes	.
Aurkb	ENSMUSG00000020897.13	protein_coding	chr11_68900000	1685.16	1718.79	-0.0284	238.099	236.112	0.8885	0.9297	-0.0412	biallelic	Autosomes	.
Auts2	ENSMUSG00000029673.20	protein_coding	chr5_132500000	513.423	679.91	-0.4018	0.3946	0.5081	0.5757	0.9236	-0.3478	biallelic	Autosomes	.
Aven	ENSMUSG00000003604.15	protein_coding	chr2_112350000	164.272	135.105	0.2728	0.9862	0.7886	0.5576	0.409	0.1486	biallelic	Autosomes	.
Avil	ENSMUSG00000025432.12	protein_coding	chr10_126850000	94.8195	24.1293	1.7768	3.9739	0.9832	0.8757	0.7618	0.1138	skewed:B6	Autosomes	.
Avl9	ENSMUSG00000029787.11	protein_coding	chr6_56700000	1280.99	1263.82	0.0194	23.1645	22.2199	0.79	0.6044	0.1856	biallelic	Autosomes	.
Avpi1	ENSMUSG00000018821.4	protein_coding	chr19_42100000	388.819	396.642	-0.0284	57.1301	56.6625	0.8382	0.7235	0.1147	biallelic	Autosomes	.
Awat2	ENSMUSG00000031220.15	protein_coding	chrX_99450000	7.64376	3.48732	0.575	0.1605	0.0712	0.8141	0.6543	0.1598	biallelic	X	ESCAPEE
Axdnd1	ENSMUSG00000026601.16	protein_coding	chr1_156200000	17.6519	30.9824	-0.6677	0.1537	0.2623	0.8482	0.6497	0.1985	biallelic	Autosomes	.
Axin1	ENSMUSG00000024182.19	protein_coding	chr17_26400000	844.733	874.985	-0.0505	12.572	12.6609	0.8227	0.8157	0.0071	biallelic	Autosomes	.
Axin2	ENSMUSG00000000142.16	protein_coding	chr11_108800000	870.586	934.765	-0.1021	24.3192	25.3874	0.9292	0.7826	0.1467	biallelic	Autosomes	.
Axl	ENSMUSG00000002602.17	protein_coding	chr7_25450000	2999.9	2677.76	0.1636	81.1393	70.4166	0.7826	0.8482	-0.0656	biallelic	Autosomes	.
Azi2	ENSMUSG00000039285.13	protein_coding	chr9_117850000	1418.55	1299.2	0.1263	41.1668	36.6572	0.8397	0.7579	0.0818	biallelic	Autosomes	.
Azin1	ENSMUSG00000037458.16	protein_coding	chr15_38450000	810.524	885.01	-0.1261	21.6423	22.9755	0.9008	0.7352	0.1655	biallelic	Autosomes	.
Azin2	ENSMUSG00000028789.17	protein_coding	chr4_128850000	328.416	428.507	-0.3787	8.6685	10.9965	0.8724	0.993	-0.1205	biallelic	Autosomes	.
B130024G19Rik	ENSMUSG00000100005.10	lncRNA	chr7_70050000	47.1962	38.3518	0.2679	0.3027	0.2392	0.546	0.4893	0.0567	biallelic	Autosomes	.
B130034C11Rik	ENSMUSG00000093606.4	lncRNA	chr16_87300000	92.6832	16.774	2.1655	4.4064	0.7753	0.626	0.5055	0.1205	skewed:B6	Autosomes	.
B230206L02Rik	ENSMUSG00000086003.10	lncRNA	chr11_94000000	232.338	182.418	0.3407	7.6264	5.8216	0.8799	0.92	-0.0401	biallelic	Autosomes	.
B230208H11Rik	ENSMUSG00000097378.11	lncRNA	chr10_12750000	42.1863	15.6621	1.1914	5.4201	1.9564	0.7391	0.6887	0.0505	skewed:B6	Autosomes	.
B230217C12Rik	ENSMUSG00000050538.9	protein_coding	chr11_97700000	242.842	206.142	0.2312	62.2031	51.3374	0.9727	0.967	0.0057	biallelic	Autosomes	.
B230219D22Rik	ENSMUSG00000045767.10	protein_coding	chr13_55850000	352.152	1155.36	-1.7	28.8533	92.0374	0.9682	0.8314	0.1368	skewed:CAST	Autosomes	.
B230303O12Rik	ENSMUSG00000106547.2	lncRNA	chr5_146100000	51.7557	120.812	-1.1484	7.1094	16.1349	0.5422	0.4681	0.0741	biallelic	Autosomes	.
B230307C23Rik	ENSMUSG00000080717.12	protein_coding	chr16_97750000	279.109	358.828	-0.3568	6.8435	8.554	0.724	0.5848	0.1391	biallelic	Autosomes	.
B230311B06Rik	ENSMUSG00000109284.4	lncRNA	chr7_118150000	471.453	21.6852	4.1582	81.3489	3.6379	0.7119	0.7714	-0.0595	mono:B6	Autosomes	.
B230334C09Rik	ENSMUSG00000104597.2	lncRNA	chr3_157750000	169.111	118.017	0.5011	16.1068	10.9286	0.427	0.4608	-0.0338	biallelic	Autosomes	.
B230354K17Rik	ENSMUSG00000097119.4	lncRNA	chr17_45700000	1166.53	871.665	0.4183	31.4534	22.8508	0.8638	0.8217	0.0421	biallelic	Autosomes	.
B230369F24Rik	ENSMUSG00000086350.4	lncRNA	chr1_178100000	52.5642	119.915	-1.1177	1.0766	2.3879	0.6542	0.5026	0.1515	biallelic	Autosomes	.
B230398E01Rik	ENSMUSG00000087660.3	lncRNA	chr3_94850000	18.655	38.2231	-0.8697	0.9582	1.9088	0.9662	0.8599	0.1063	biallelic	Autosomes	.
B2m	ENSMUSG00000060802.9	protein_coding	chr2_121950000	3802.73	3359.19	0.1787	599.017	514.467	0.7778	0.7557	0.0222	biallelic	Autosomes	.
B3galnt1	ENSMUSG00000043300.3	protein_coding	chr3_69450000	614.998	784.468	-0.3486	21.0806	26.1435	0.78	0.8601	-0.0801	biallelic	Autosomes	.
B3galnt2	ENSMUSG00000039242.11	protein_coding	chr13_14150000	309.234	297.237	0.0562	5.89	5.5044	0.7574	0.5359	0.2215	biallelic	Autosomes	.
B3galt1	ENSMUSG00000034780.7	protein_coding	chr2_67400000	447.499	467.27	-0.0617	0.6832	0.6936	0.443	0.5904	-0.1474	biallelic	Autosomes	.
B3galt2	ENSMUSG00000033849.4	protein_coding	chr1_143500000	69.0299	64.1868	0.0976	4.2069	3.8032	0.5488	0.5268	0.022	biallelic	Autosomes	.
B3galt4	ENSMUSG00000067370.5	protein_coding	chr17_34150000	105.006	100.963	0.054	56.5366	52.8514	0.883	0.7345	0.1485	biallelic	Autosomes	.
B3galt5	ENSMUSG00000074892.10	protein_coding	chr16_96000000	123.17	124.375	-0.0135	1.2457	1.223	0.7644	0.5417	0.2227	biallelic	Autosomes	.
B3galt6	ENSMUSG00000050796.5	protein_coding	chr4_156050000	402.554	352.218	0.1902	107.519	91.464	0.8191	0.8673	-0.0482	biallelic	Autosomes	.
B3gat1	ENSMUSG00000045994.18	protein_coding	chr9_26600000	437.261	503.175	-0.2004	12.6558	14.1594	0.7071	0.8517	-0.1445	biallelic	Autosomes	.
B3gat2	ENSMUSG00000026156.9	protein_coding	chr1_23850000	238.544	903.77	-1.8997	2.3202	8.5467	0.6042	0.4754	0.1288	skewed:CAST	Autosomes	.
B3gat3	ENSMUSG00000071649.7	protein_coding	chr19_8850000	1000.71	953	0.0701	123.981	114.793	0.9714	0.8181	0.1532	biallelic	Autosomes	.
B3glct	ENSMUSG00000051950.11	protein_coding	chr5_149650000	1164.42	1092.35	0.0918	11.7334	10.7017	0.5126	0.585	-0.0724	biallelic	Autosomes	.
B3gnt5	ENSMUSG00000022686.15	protein_coding	chr16_19550000	2346.83	3035.73	-0.3706	159.04	200.017	0.6122	0.5962	0.016	biallelic	Autosomes	.
B3gnt7	ENSMUSG00000079445.4	protein_coding	chr1_86200000	7.34085	16.3018	-0.7875	1.3952	3.0124	0.7992	0.8673	-0.0681	biallelic	Autosomes	.
B3gnt9	ENSMUSG00000069920.11	protein_coding	chr8_105950000	28.7772	41.573	-0.4634	9.7276	13.6631	0.6811	0.6553	0.0258	biallelic	Autosomes	.
B3gntl1	ENSMUSG00000046605.15	protein_coding	chr11_121550000	389.891	521.004	-0.4136	5.8197	7.561	0.8454	0.626	0.2194	biallelic	Autosomes	.
B430105G09Rik	ENSMUSG00000119961.2	lncRNA	chr1_59800000	28.3131	63.7692	-1.0457	10.9163	23.9044	0.9522	0.9874	-0.0352	biallelic	Autosomes	.
B4galnt1	ENSMUSG00000006731.11	protein_coding	chr10_127000000	91.5188	90.4413	0.0162	10.9507	10.5215	0.8596	0.9078	-0.0482	biallelic	Autosomes	.
B4galnt4	ENSMUSG00000055629.6	protein_coding	chr7_140600000	414.609	324.399	0.3492	31.204	23.7372	0.8158	0.9588	-0.143	biallelic	Autosomes	.
B4galt1	ENSMUSG00000028413.14	protein_coding	chr4_40850000	143.528	149.121	-0.0533	2.4699	2.495	0.8848	0.8371	0.0477	biallelic	Autosomes	.
B4galt2	ENSMUSG00000028541.15	protein_coding	chr4_117700000	668.259	703.77	-0.0742	39.9326	40.8877	0.8595	0.9425	-0.083	biallelic	Autosomes	.
B4galt3	ENSMUSG00000052423.16	protein_coding	chr1_171100000	9.54979	46.2867	-1.8176	1.2355	5.8224	0.7624	0.7995	-0.0371	skewed:CAST	Autosomes	.
B4galt6	ENSMUSG00000056124.6	protein_coding	chr18_20850000	1040.6	948.071	0.1337	14.3138	12.6792	0.4417	0.6763	-0.2346	biallelic	Autosomes	.
B4galt7	ENSMUSG00000021504.15	protein_coding	chr13_55750000	449.863	310.076	0.5297	36.2616	24.3004	0.9535	0.8731	0.0804	biallelic	Autosomes	.
B630019K06Rik	ENSMUSG00000052364.5	protein_coding	chrX_8750000	266.828	0	5.7646	87.8559	0	0.537	0.5133	0.0237	mono:B6	X	.
B930036N10Rik	ENSMUSG00000091993.3	lncRNA	chr1_171300000	6.81567	62.8863	-2.5224	1.6354	14.671	0.555	0.5984	-0.0434	skewed:CAST	Autosomes	.
B930046K06Rik	ENSMUSG00000120844.1	lncRNA	chr4_155650000	32.1447	19.2481	0.6153	10.8144	6.2959	0.726	0.7857	-0.0597	biallelic	Autosomes	.
B930059L03Rik	ENSMUSG00000113361.3	lncRNA	chr12_110550000	16.9379	17.1776	-0.0157	6.2854	6.1974	0.9236	0.9491	-0.0255	biallelic	Autosomes	.
B930094E09Rik	ENSMUSG00000092124.4	lncRNA	chr18_31750000	12.2505	28.0431	-0.9377	0.8857	1.9712	0.8363	0.7894	0.0469	biallelic	Autosomes	.
B9d1	ENSMUSG00000001039.13	protein_coding	chr11_61400000	312.251	802.19	-1.3473	34.0903	85.1496	0.745	0.9827	-0.2377	skewed:CAST	Autosomes	.
B9d1os	ENSMUSG00000060808.6	lncRNA	chr11_61350000	86.0012	63.9349	0.4007	54.9729	39.7339	0.9671	0.8786	0.0885	biallelic	Autosomes	.
B9d2	ENSMUSG00000063439.8	protein_coding	chr7_25350000	124.417	127.041	-0.029	18.3062	18.1737	0.8514	0.8383	0.0131	biallelic	Autosomes	.
BB187676	ENSMUSG00000120695.2	lncRNA	chr10_70400000	28.4075	27.8757	0.0232	0.7583	0.7234	0.9039	0.6174	0.2865	biallelic	Autosomes	.
BB218582	ENSMUSG00000085218.10	lncRNA	chr2_106450000	25.6516	0	2.616	0.7987	0	0.4652	0.3691	0.0962	mono:B6	Autosomes	.
BB557941	ENSMUSG00000084938.4	lncRNA	chr2_57050000	26.2654	16.6824	0.528	0.3199	0.1975	0.4896	0.785	-0.2955	biallelic	Autosomes	.
BC002059	ENSMUSG00000060149.10	lncRNA	chr17_17150000	99.7662	120.081	-0.2557	2.0476	2.3962	0.2236	0.3955	-0.1719	biallelic	Autosomes	.
BC004004	ENSMUSG00000052712.18	protein_coding	chr17_29450000	840.179	874.936	-0.0581	15.7758	15.9725	0.9245	0.9711	-0.0466	biallelic	Autosomes	.
BC005537	ENSMUSG00000019132.12	protein_coding	chr13_24950000	1556.65	1775.35	-0.1891	91.0172	100.924	0.8254	0.6812	0.1442	biallelic	Autosomes	.
BC006965	ENSMUSG00000041674.18	lncRNA	chr11_112600000	240.206	256.259	-0.0915	1.468	1.5227	0.5104	0.4448	0.0656	biallelic	Autosomes	.
BC016548	ENSMUSG00000070794.13	lncRNA	chr2_103200000	8.84955	12.929	-0.3725	0.5965	0.8473	0.7238	0.7716	-0.0477	biallelic	Autosomes	.
BC024139	ENSMUSG00000044361.17	protein_coding	chr15_76000000	122.782	76.1959	0.6542	14.7455	8.8968	0.9737	0.992	-0.0183	biallelic	Autosomes	.
BC025920	ENSMUSG00000074862.12	protein_coding	chr10_81450000	155.072	60.1057	1.2979	9.1343	3.4422	0.7882	0.7418	0.0464	skewed:B6	Autosomes	.
BC026513	ENSMUSG00000118004.2	lncRNA	chr18_76350000	8.22995	5.55081	0.3265	3.2467	2.129	0.6234	0.8598	-0.2365	biallelic	Autosomes	.
BC030343	ENSMUSG00000105345.4	lncRNA	chr5_143250000	24.1843	14.0251	0.6173	6.2837	3.543	0.8411	0.8737	-0.0326	biallelic	Autosomes	.
BC031181	ENSMUSG00000036299.6	protein_coding	chr18_75100000	553.641	459.974	0.2648	109.869	88.7481	0.7536	0.8666	-0.1131	biallelic	Autosomes	.
BC034090	ENSMUSG00000033722.10	protein_coding	chr1_155050000	188.143	84.0888	1.1164	5.0027	2.1739	0.7273	0.6993	0.028	biallelic	Autosomes	.
BC035044	ENSMUSG00000090164.9	protein_coding	chr6_128850000	1.23921	12.3651	-1.4768	0.0251	0.2431	0.4576	0.1861	0.2715	mono:CAST	Autosomes	.
BC037039	ENSMUSG00000103309.2	lncRNA	chr18_37900000	109.796	65.2759	0.708	42.3518	24.4803	0.6807	0.738	-0.0573	biallelic	Autosomes	.
BC037704	ENSMUSG00000117698.4	lncRNA	chr19_43650000	34.9733	128.344	-1.738	12.9893	46.3451	0.8212	0.8883	-0.0672	skewed:CAST	Autosomes	.
BC048644	ENSMUSG00000074052.9	lncRNA	chr8_122600000	6.40455	18.182	-1.0234	0.3671	1.0134	0.9678	0.9423	0.0255	skewed:CAST	Autosomes	.
BC051226	ENSMUSG00000092564.5	lncRNA	chr17_34100000	110.78	83.6182	0.3857	34.5233	25.3356	0.8975	0.8448	0.0527	biallelic	Autosomes	.
BC055402	ENSMUSG00000101429.3	lncRNA	chr1_57200000	14.9984	9.01523	0.5129	0.4472	0.2614	0.6408	0.4598	0.181	biallelic	Autosomes	.
BC065397	ENSMUSG00000087368.9	lncRNA	chrX_135700000	334.107	164.854	0.9974	4.612	2.2125	0.5802	0.3546	0.2256	biallelic	X	ESCAPEE
BC106179	ENSMUSG00000045231.7	lncRNA	chr16_23000000	24.6288	2.25381	2.0302	2.2133	0.1969	0.9089	0.807	0.102	mono:B6	Autosomes	.
Baalc	ENSMUSG00000022296.11	protein_coding	chr15_38750000	14.1093	3.06088	1.2453	0.1588	0.0335	0.646	0.7953	-0.1493	skewed:B6	Autosomes	.
Baat	ENSMUSG00000039653.10	protein_coding	chr4_49500000	3.84549	8.16234	-0.5734	0.1908	0.3937	0.5295	0.6417	-0.1122	biallelic	Autosomes	.
Babam1	ENSMUSG00000031820.10	protein_coding	chr8_71850000	1258.93	1446.02	-0.1992	137.958	154.064	0.8885	0.8346	0.0539	biallelic	Autosomes	.
Babam2	ENSMUSG00000052139.19	protein_coding	chr5_32000000	618.504	635.616	-0.0391	1.3577	1.3566	0.7318	0.9007	-0.1689	biallelic	Autosomes	.
Bace1	ENSMUSG00000032086.13	protein_coding	chr9_45750000	817.184	934.214	-0.192	26.9077	29.9076	0.9506	0.86	0.0906	biallelic	Autosomes	.
Bace2	ENSMUSG00000040605.8	protein_coding	chr16_97200000	84.3646	215.439	-1.3026	0.8321	2.066	0.5397	0.7525	-0.2129	skewed:CAST	Autosomes	.
Bach1	ENSMUSG00000025612.6	protein_coding	chr16_87450000	1098.09	825.68	0.4092	27.1371	19.8388	0.5263	0.6291	-0.1028	biallelic	Autosomes	.
Bach2	ENSMUSG00000040270.17	protein_coding	chr4_32350000	434.115	303.535	0.5092	1.0627	0.7224	0.7122	0.8859	-0.1737	biallelic	Autosomes	.
Bad	ENSMUSG00000024959.15	protein_coding	chr19_6900000	781.46	671.786	0.2167	66.1844	55.3171	0.9733	0.9705	0.0028	biallelic	Autosomes	.
Bag1	ENSMUSG00000028416.14	protein_coding	chr4_40900000	45.9039	43.0126	0.0844	3.2805	2.9886	0.7476	0.9367	-0.1891	biallelic	Autosomes	.
Bag2	ENSMUSG00000042215.9	protein_coding	chr1_33750000	710.61	940.365	-0.4017	49.0721	63.1362	0.8303	0.6808	0.1495	biallelic	Autosomes	.
Bag3	ENSMUSG00000030847.9	protein_coding	chr7_128100000	374.334	290.759	0.359	13.6204	10.2859	0.8529	0.9085	-0.0555	biallelic	Autosomes	.
Bag4	ENSMUSG00000037316.10	protein_coding	chr8_26250000	362.549	405.46	-0.1593	14.8548	16.152	0.77	0.7895	-0.0195	biallelic	Autosomes	.
Bag5	ENSMUSG00000049792.7	protein_coding	chr12_111650000	643.054	608.192	0.0798	145.05	133.38	0.7706	0.8667	-0.096	biallelic	Autosomes	.
Bahcc1	ENSMUSG00000039741.17	protein_coding	chr11_120100000	1221.89	1161.69	0.0726	17.5073	16.1828	0.9653	0.9941	-0.0288	biallelic	Autosomes	.
Bahd1	ENSMUSG00000040007.9	protein_coding	chr2_118750000	475.55	406.251	0.2247	16.7401	13.9038	0.8245	0.9611	-0.1365	biallelic	Autosomes	.
Baiap2	ENSMUSG00000025372.17	protein_coding	chr11_119850000	652.995	486.726	0.4202	8.6716	6.2842	0.9848	0.8865	0.0983	biallelic	Autosomes	.
Baiap2l2	ENSMUSG00000018126.16	protein_coding	chr15_79100000	16.4599	47.8251	-1.2996	0.5118	1.4458	0.963	0.957	0.006	skewed:CAST	Autosomes	.
Baiap3	ENSMUSG00000047507.14	protein_coding	chr17_25450000	19.3219	9.63198	0.7331	1.1986	0.5809	0.9989	0.9738	0.0251	biallelic	Autosomes	.
Bak1	ENSMUSG00000057789.15	protein_coding	chr17_27200000	2014.55	2347.4	-0.2201	186.181	210.922	0.9947	0.902	0.0927	biallelic	Autosomes	.
Bambi	ENSMUSG00000024232.3	protein_coding	chr18_3500000	96.2316	121.269	-0.3188	9.6464	11.8189	0.4169	0.6892	-0.2723	biallelic	Autosomes	.
Banp	ENSMUSG00000025316.17	protein_coding	chr8_122750000	616.399	564.467	0.1259	6.5909	5.8682	0.936	0.77	0.166	biallelic	Autosomes	.
Bap1	ENSMUSG00000021901.11	protein_coding	chr14_30950000	1356.22	1515.19	-0.1594	135.742	147.445	0.9317	0.9122	0.0195	biallelic	Autosomes	.
Bard1	ENSMUSG00000026196.8	protein_coding	chr1_71100000	314.8	507.178	-0.6795	3.5378	5.5416	0.6878	0.4493	0.2385	biallelic	Autosomes	.
Barx1	ENSMUSG00000021381.5	protein_coding	chr13_48800000	11.7725	0	1.7461	2.8522	0	0.9026	0.932	-0.0294	mono:B6	Autosomes	.
Barx2	ENSMUSG00000032033.12	protein_coding	chr9_31750000	188.433	19.4543	2.9837	2.3762	0.2385	0.6884	0.6679	0.0205	mono:B6	Autosomes	.
Basp1	ENSMUSG00000045763.9	protein_coding	chr15_25400000	4306.57	4066.81	0.0825	72.5184	66.5809	0.7336	0.7098	0.0237	biallelic	Autosomes	.
Batf2	ENSMUSG00000039699.15	protein_coding	chr19_6200000	15.3957	32.0326	-0.8605	0.4156	0.8407	0.7803	0.9582	-0.1778	biallelic	Autosomes	.
Batf3	ENSMUSG00000026630.10	protein_coding	chr1_190800000	11.0113	15.5176	-0.3578	0.8435	1.1557	0.9127	0.8624	0.0503	biallelic	Autosomes	.
Bax	ENSMUSG00000003873.12	protein_coding	chr7_45100000	1059.17	1462.84	-0.464	173.131	232.48	0.9878	0.8844	0.1034	biallelic	Autosomes	.
Baz1a	ENSMUSG00000035021.15	protein_coding	chr12_55050000	375.717	357.89	0.0692	2.6442	2.4489	0.7341	0.9061	-0.172	biallelic	Autosomes	.
Baz1b	ENSMUSG00000002748.8	protein_coding	chr5_135200000	1766.22	1939.36	-0.1346	25.5085	27.2319	0.9218	0.804	0.1178	biallelic	Autosomes	.
Baz2a	ENSMUSG00000040054.18	protein_coding	chr10_127900000	1072.26	1022.4	0.0684	24.1632	22.4005	0.9032	0.6664	0.2368	biallelic	Autosomes	.
Baz2b	ENSMUSG00000026987.17	protein_coding	chr2_59750000	543.345	685.006	-0.3315	1.4878	1.8237	0.7947	0.941	-0.1463	biallelic	Autosomes	.
Bbc3	ENSMUSG00000002083.14	protein_coding	chr7_16050000	588.343	430.895	0.4449	50.9764	36.2985	0.8471	0.9906	-0.1435	biallelic	Autosomes	.
Bbip1	ENSMUSG00000084957.4	protein_coding	chr19_53900000	1718.23	1396.53	0.2981	98.9272	78.1743	0.676	0.7228	-0.0469	biallelic	Autosomes	.
Bbof1	ENSMUSG00000057265.14	protein_coding	chr12_84450000	107.135	98.7781	0.1117	2.6934	2.4144	0.8732	0.7974	0.0759	biallelic	Autosomes	.
Bbox1	ENSMUSG00000041660.9	protein_coding	chr2_110100000	11.1057	6.76142	0.4535	0.182	0.1078	0.4709	0.3621	0.1087	biallelic	Autosomes	.
Bbs1	ENSMUSG00000006464.10	protein_coding	chr19_4900000	475.883	451.847	0.074	20.4847	18.9103	0.974	0.835	0.139	biallelic	Autosomes	.
Bbs10	ENSMUSG00000035759.5	protein_coding	chr10_111100000	175.761	203.052	-0.2029	49.0235	55.0641	0.6691	0.6262	0.0429	biallelic	Autosomes	.
Bbs2	ENSMUSG00000031755.7	protein_coding	chr8_94800000	640.902	603.665	0.0857	17.591	16.1092	0.744	0.7979	-0.0539	biallelic	Autosomes	.
Bbs4	ENSMUSG00000025235.9	protein_coding	chr9_59200000	257.817	276.529	-0.0992	6.9542	7.252	0.8843	0.9884	-0.1042	biallelic	Autosomes	.
Bbs5	ENSMUSG00000063145.11	protein_coding	chr2_69450000	85.2341	75.433	0.1659	3.5521	3.0564	0.7896	0.6331	0.1566	biallelic	Autosomes	.
Bbs7	ENSMUSG00000037325.11	protein_coding	chr3_36650000	903.774	889.899	0.0222	19.0491	18.2362	0.918	0.7247	0.1933	biallelic	Autosomes	.
Bbs9	ENSMUSG00000035919.17	protein_coding	chr9_22650000	589.005	676.294	-0.1978	1.2137	1.3549	0.5263	0.7886	-0.2624	biallelic	Autosomes	.
Bbx	ENSMUSG00000022641.16	protein_coding	chr16_50200000	970.832	939.047	0.0478	3.4312	3.2267	0.5294	0.6696	-0.1402	biallelic	Autosomes	.
Bcam	ENSMUSG00000002980.15	protein_coding	chr7_19450000	154.628	97.9852	0.6323	8.8315	5.4411	0.8847	0.7541	0.1306	biallelic	Autosomes	.
Bcan	ENSMUSG00000004892.14	protein_coding	chr3_87900000	28297	16172.2	0.8069	1894.38	1052.63	0.9376	0.8508	0.0868	biallelic	Autosomes	.
Bcap29	ENSMUSG00000020650.16	protein_coding	chr12_31650000	1030.14	1226.38	-0.2504	20.0447	23.201	0.5646	0.6143	-0.0497	biallelic	Autosomes	.
Bcap31	ENSMUSG00000002015.6	protein_coding	chrX_72700000	5252.89	167.644	4.9286	148.873	4.6194	0.8901	0.7375	0.1527	mono:B6	X	.
Bcar1	ENSMUSG00000031955.11	protein_coding	chr8_112400000	825.881	1294.37	-0.6451	21.0627	32.0948	0.902	0.9861	-0.0841	biallelic	Autosomes	.
Bcar3	ENSMUSG00000028121.9	protein_coding	chr3_122200000	210.335	36.9438	2.3601	0.7575	0.1294	0.9347	0.7209	0.2138	skewed:B6	Autosomes	.
Bcas1	ENSMUSG00000013523.14	protein_coding	chr2_170150000	1005.74	1982.41	-0.9755	10.575	20.266	0.9342	0.7708	0.1635	biallelic	Autosomes	.
Bcas1os2	ENSMUSG00000086999.3	lncRNA	chr2_170150000	10.4861	26.0025	-1.0014	0.2464	0.5941	0.9342	0.7708	0.1635	skewed:CAST	Autosomes	.
Bcas2	ENSMUSG00000005687.15	protein_coding	chr3_103050000	1098.8	937.792	0.2275	124.37	103.201	0.7536	0.667	0.0866	biallelic	Autosomes	.
Bcas3	ENSMUSG00000059439.16	protein_coding	chr11_85550000	270.959	321.554	-0.2429	0.4871	0.562	0.9989	0.7739	0.225	biallelic	Autosomes	.
Bcat1	ENSMUSG00000030268.18	protein_coding	chr6_145000000	396.393	592.609	-0.5742	4.0923	5.9482	0.8059	0.8591	-0.0532	biallelic	Autosomes	.
Bcat2	ENSMUSG00000030826.20	protein_coding	chr7_45200000	517.459	537.724	-0.0549	22.493	22.7253	0.8885	0.983	-0.0945	biallelic	Autosomes	.
Bccip	ENSMUSG00000030983.5	protein_coding	chr7_133300000	2209.99	1866.93	0.2428	159.06	130.641	0.7192	0.7799	-0.0607	biallelic	Autosomes	.
Bcdin3d	ENSMUSG00000037525.6	protein_coding	chr15_99350000	183.6	172.04	0.0913	33.56	30.5745	0.9739	0.9162	0.0577	biallelic	Autosomes	.
Bche	ENSMUSG00000027792.12	protein_coding	chr3_73550000	2959.96	4342.33	-0.5521	34.658	49.4333	0.1492	0.3235	-0.1743	biallelic	Autosomes	.
Bckdha	ENSMUSG00000060376.8	protein_coding	chr7_25300000	1400.05	1425.81	-0.0262	40.9938	40.5897	0.8964	0.7064	0.19	biallelic	Autosomes	.
Bckdhb	ENSMUSG00000032263.15	protein_coding	chr9_83800000	297.987	308.98	-0.0514	1.2724	1.2828	0.6594	0.515	0.1443	biallelic	Autosomes	.
Bckdk	ENSMUSG00000030802.15	protein_coding	chr7_127500000	905.214	826.6	0.1303	125.357	111.294	0.8894	0.9351	-0.0458	biallelic	Autosomes	.
Bcl10	ENSMUSG00000028191.12	protein_coding	chr3_145600000	1358.3	1349.72	0.0091	99.9621	96.5744	0.7392	0.9378	-0.1986	biallelic	Autosomes	.
Bcl11a	ENSMUSG00000000861.16	protein_coding	chr11_24100000	42.1253	133.842	-1.5589	0.3728	1.1516	0.2587	0.6209	-0.3622	skewed:CAST	Autosomes	.
Bcl11b	ENSMUSG00000048251.16	protein_coding	chr12_107850000	48.9272	31.9639	0.5449	0.4463	0.2835	0.3939	0.6079	-0.2141	biallelic	Autosomes	.
Bcl2	ENSMUSG00000057329.8	protein_coding	chr1_106600000	886.153	1944.09	-1.1291	4.2781	9.1252	0.7135	0.5662	0.1473	biallelic	Autosomes	.
Bcl2l1	ENSMUSG00000007659.19	protein_coding	chr2_152650000	452.442	537.783	-0.2468	7.5332	8.7057	0.8359	0.9827	-0.1468	biallelic	Autosomes	.
Bcl2l11	ENSMUSG00000027381.18	protein_coding	chr2_128000000	635.849	495.108	0.3577	14.8064	11.2092	0.9989	0.8271	0.1718	biallelic	Autosomes	.
Bcl2l12	ENSMUSG00000003190.13	protein_coding	chr7_44600000	621.399	557.607	0.155	70.5318	61.5349	0.8655	0.9121	-0.0466	biallelic	Autosomes	.
Bcl2l13	ENSMUSG00000009112.5	protein_coding	chr6_120850000	2512.98	3200.02	-0.3481	37.7258	46.707	0.9833	0.818	0.1653	biallelic	Autosomes	.
Bcl2l15	ENSMUSG00000044165.13	protein_coding	chr3_103700000	11.1863	6.5482	0.4871	0.4319	0.2458	0.883	0.8368	0.0463	biallelic	Autosomes	.
Bcl6	ENSMUSG00000022508.6	protein_coding	chr16_23750000	451.645	518.792	-0.1979	16.133	18.0174	0.7841	0.8671	-0.0831	biallelic	Autosomes	.
Bcl7a	ENSMUSG00000029438.10	protein_coding	chr5_123450000	652.612	611.651	0.0928	17.8066	16.2259	0.8791	0.9996	-0.1205	biallelic	Autosomes	.
Bcl7b	ENSMUSG00000029681.13	protein_coding	chr5_135200000	574.915	527.567	0.1229	36.0127	32.1299	0.9218	0.804	0.1178	biallelic	Autosomes	.
Bcl9	ENSMUSG00000038256.16	protein_coding	chr3_97200000	266.955	225.575	0.2381	2.4079	1.9782	0.7914	0.6168	0.1746	biallelic	Autosomes	.
Bcl9l	ENSMUSG00000063382.7	protein_coding	chr9_44400000	829.144	947.565	-0.1915	24.2475	26.9417	0.9697	0.9647	0.005	biallelic	Autosomes	.
Bclaf3	ENSMUSG00000044150.13	protein_coding	chrX_158300000	433.265	165.575	1.3614	5.5479	2.0613	0.7546	0.2856	0.469	skewed:B6	X	ESCAPEE
Bco2	ENSMUSG00000032066.10	protein_coding	chr9_50450000	53.6559	128.733	-1.189	2.0646	4.8161	0.9622	0.8085	0.1537	biallelic	Autosomes	.
Bcor	ENSMUSG00000040363.16	protein_coding	chrX_11900000	667.034	0	7.0705	4.5875	0	0.9854	0.7313	0.2541	mono:B6	X	.
Bcorl1	ENSMUSG00000036959.16	protein_coding	chrX_47450000	373.49	0	6.2422	4.7611	0	0.7387	0.9099	-0.1712	mono:B6	X	.
Bcr	ENSMUSG00000009681.11	protein_coding	chr10_74850000	863.112	879.144	-0.0264	5.9019	5.8447	0.9987	0.7586	0.2401	biallelic	Autosomes	.
Bcs1l	ENSMUSG00000026172.13	protein_coding	chr1_74600000	431.637	651.091	-0.5875	88.3381	129.554	0.7662	0.84	-0.0739	biallelic	Autosomes	.
Bdh2	ENSMUSG00000028167.16	protein_coding	chr3_135000000	567.97	1202.93	-1.076	20.8085	42.8485	0.5492	0.387	0.1623	biallelic	Autosomes	.
Bdkrb2	ENSMUSG00000021070.7	protein_coding	chr12_105550000	29.8	10.7052	1.1478	0.7914	0.2764	0.9235	0.9036	0.0199	skewed:B6	Autosomes	.
Bdnf	ENSMUSG00000048482.15	protein_coding	chr2_109500000	84.0755	52.553	0.6301	1.3665	0.8304	0.3771	0.4963	-0.1192	biallelic	Autosomes	.
Bdp1	ENSMUSG00000049658.14	protein_coding	chr13_100200000	852.529	907.748	-0.09	8.4202	8.7168	0.6804	0.8698	-0.1894	biallelic	Autosomes	.
Bean1	ENSMUSG00000031872.15	protein_coding	chr8_104850000	10.2972	18.9591	-0.6473	0.1798	0.3219	0.6626	0.5613	0.1013	biallelic	Autosomes	.
Becn1	ENSMUSG00000035086.14	protein_coding	chr11_101150000	597.758	630.404	-0.0761	31.1121	31.9008	0.9338	0.9935	-0.0597	biallelic	Autosomes	.
Begain	ENSMUSG00000040867.14	protein_coding	chr12_108950000	35.168	31.4917	0.1385	0.8298	0.7224	0.4977	0.6007	-0.103	biallelic	Autosomes	.
Bend3	ENSMUSG00000038214.17	protein_coding	chr10_43350000	301.763	340.124	-0.17	7.0161	7.6886	0.9317	0.7971	0.1346	biallelic	Autosomes	.
Bend4	ENSMUSG00000092060.5	protein_coding	chr5_67550000	293.116	308.807	-0.074	6.8908	7.0583	0.5876	0.7645	-0.1769	biallelic	Autosomes	.
Bend6	ENSMUSG00000042182.17	protein_coding	chr1_33900000	190.972	566.08	-1.543	2.9115	8.3907	0.6905	0.9284	-0.2379	skewed:CAST	Autosomes	.
Bend7	ENSMUSG00000048186.15	protein_coding	chr2_4800000	275.972	252.004	0.1286	2.7828	2.4706	0.5992	0.8389	-0.2397	biallelic	Autosomes	.
Bet1	ENSMUSG00000032757.7	protein_coding	chr6_4050000	1931.01	1775.43	0.1209	162.975	145.686	0.41	0.6832	-0.2732	biallelic	Autosomes	.
Bet1l	ENSMUSG00000025484.10	protein_coding	chr7_140400000	31.0806	13.1722	0.9895	6.3168	2.6028	0.554	0.5786	-0.0246	skewed:B6	Autosomes	.
Bex1	ENSMUSG00000050071.9	protein_coding	chrX_135100000	0.619607	323.487	-5.8692	0.3418	173.512	0.5762	0.4093	0.1668	mono:CAST	X	ESCAPEE
Bex2	ENSMUSG00000042750.8	protein_coding	chrX_134950000	1822.41	1.82737	8.0643	926.631	0.9034	0.638	0.3935	0.2444	mono:B6	X	.
Bex3	ENSMUSG00000046432.13	protein_coding	chrX_135150000	87.2425	16.226	2.1196	42.9967	7.7749	0.7074	0.3777	0.3296	skewed:B6	X	ESCAPEE
Bex4	ENSMUSG00000047844.4	protein_coding	chrX_135000000	1.192	112.287	-4.2435	0.7003	64.141	0.7335	0.4241	0.3093	mono:CAST	X	ESCAPEE
Bfar	ENSMUSG00000022684.16	protein_coding	chr16_13500000	812.936	675.63	0.2651	21.7648	17.5867	0.9516	0.7001	0.2515	biallelic	Autosomes	.
Bfsp2	ENSMUSG00000032556.12	protein_coding	chr9_103300000	71.5105	52.6147	0.4092	1.0955	0.7836	0.9405	0.7328	0.2077	biallelic	Autosomes	.
Bhlhb9	ENSMUSG00000072964.15	protein_coding	chrX_134750000	2436.81	18.8904	6.6754	22.1598	0.167	0.6779	0.1983	0.4796	mono:B6	X	.
Bhlhe22	ENSMUSG00000025128.8	protein_coding	chr3_18100000	2.384	8.28394	-0.8472	0.6063	2.0482	0.3647	0.3266	0.0381	skewed:CAST	Autosomes	.
Bhlhe40	ENSMUSG00000030103.12	protein_coding	chr6_108600000	1788.53	1676.72	0.0929	241.506	220.126	0.5408	0.4823	0.0585	biallelic	Autosomes	.
Bhlhe41	ENSMUSG00000030256.12	protein_coding	chr6_145800000	511.011	239.584	1.0771	59.3898	27.0719	0.719	0.7874	-0.0684	biallelic	Autosomes	.
Bicc1	ENSMUSG00000014329.15	protein_coding	chr10_70950000	568.846	856.899	-0.5869	2.0417	2.9902	0.8242	0.6476	0.1766	biallelic	Autosomes	.
Bicd1	ENSMUSG00000003452.16	protein_coding	chr6_149350000	176.237	150.293	0.2229	0.9701	0.8044	0.4794	0.2343	0.2451	biallelic	Autosomes	.
Bicd2	ENSMUSG00000037933.17	protein_coding	chr13_49450000	587.826	550.856	0.0929	10.9976	10.02	0.9957	0.8736	0.1221	biallelic	Autosomes	.
Bicdl1	ENSMUSG00000041609.17	protein_coding	chr5_115850000	127.656	124.293	0.0371	1.3006	1.2312	0.7175	0.8608	-0.1432	biallelic	Autosomes	.
Bicra	ENSMUSG00000070808.5	protein_coding	chr7_15750000	404.242	406.29	-0.0072	4.4488	4.3473	0.955	0.9923	-0.0373	biallelic	Autosomes	.
Bicral	ENSMUSG00000036568.8	protein_coding	chr17_47150000	531.159	465.317	0.189	7.481	6.3718	0.8349	0.989	-0.1541	biallelic	Autosomes	.
Bid	ENSMUSG00000004446.13	protein_coding	chr6_120850000	276.542	444.857	-0.6761	9.4332	14.7535	0.9833	0.818	0.1653	biallelic	Autosomes	.
Bin1	ENSMUSG00000024381.18	protein_coding	chr18_32550000	1966.45	2004.45	-0.0275	28.574	28.3181	0.6549	0.7471	-0.0922	biallelic	Autosomes	.
Bin3	ENSMUSG00000022089.10	protein_coding	chr14_70300000	464.681	394.883	0.2321	10.3685	8.5666	0.954	0.8692	0.0848	biallelic	Autosomes	.
Birc2	ENSMUSG00000057367.13	protein_coding	chr9_7800000	808.551	1035.91	-0.3555	36.4915	45.4555	0.6329	0.5659	0.0671	biallelic	Autosomes	.
Birc5	ENSMUSG00000017716.16	protein_coding	chr11_117700000	1224.9	1224.09	0.001	160.405	155.851	0.9644	0.9532	0.0111	biallelic	Autosomes	.
Birc6	ENSMUSG00000024073.17	protein_coding	chr17_74800000	1060.76	1046.23	0.0198	5.1514	4.9398	0.586	0.732	-0.1461	biallelic	Autosomes	.
Bivm	ENSMUSG00000041684.12	protein_coding	chr1_44150000	893.689	970.787	-0.1187	29.4336	31.0857	0.9205	0.6201	0.3004	biallelic	Autosomes	.
Blm	ENSMUSG00000030528.13	protein_coding	chr7_80100000	689.582	809.639	-0.23	7.2929	8.325	0.9455	0.846	0.0996	biallelic	Autosomes	.
Blmh	ENSMUSG00000020840.11	protein_coding	chr11_76800000	417.943	479.79	-0.1969	5.6787	6.3381	0.9974	0.8611	0.1364	biallelic	Autosomes	.
Bloc1s1	ENSMUSG00000090247.8	protein_coding	chr10_128750000	88.6488	77.5194	0.1825	12.2485	10.4135	0.6656	0.6294	0.0361	biallelic	Autosomes	.
Bloc1s2	ENSMUSG00000057506.6	protein_coding	chr19_44100000	0.619607	217.603	-5.3079	0.0732	24.9808	0.8364	0.9241	-0.0878	mono:CAST	Autosomes	.
Bloc1s3	ENSMUSG00000057667.8	protein_coding	chr7_19200000	413.033	383.325	0.1064	90.4768	81.6393	0.8023	0.9082	-0.1059	biallelic	Autosomes	.
Bloc1s4	ENSMUSG00000060708.5	protein_coding	chr5_36900000	307.393	304.338	0.0142	205.449	197.763	0.9321	0.9451	-0.013	biallelic	Autosomes	.
Bloc1s6	ENSMUSG00000005804.15	protein_coding	chr2_122550000	1491.3	1408.48	0.0821	115.551	106.106	0.7364	0.6704	0.066	biallelic	Autosomes	.
Bloc1s6os	ENSMUSG00000085633.4	lncRNA	chr2_122600000	14.6817	5.67241	0.883	0.2359	0.0886	0.5338	0.6367	-0.1028	skewed:B6	Autosomes	.
Bltp1	ENSMUSG00000037270.19	protein_coding	chr3_37050000	977.555	907.808	0.1062	4.3757	3.9507	0.5169	0.6986	-0.1816	biallelic	Autosomes	.
Bltp2	ENSMUSG00000010277.8	protein_coding	chr11_78150000	3914.57	3664.88	0.095	115.271	104.924	0.9656	0.9271	0.0385	biallelic	Autosomes	.
Bltp3a	ENSMUSG00000039512.13	protein_coding	chr17_28100000	1072.72	1238.39	-0.2063	20.9168	23.4772	0.8543	0.998	-0.1436	biallelic	Autosomes	.
Bltp3b	ENSMUSG00000019951.11	protein_coding	chr10_89550000	688.54	688.272	0.0006	7.8174	7.5975	0.6955	0.5456	0.15	biallelic	Autosomes	.
Blvra	ENSMUSG00000001999.16	protein_coding	chr2_126900000	473.02	705.52	-0.5718	15.2216	22.0733	0.8852	0.8827	0.0025	biallelic	Autosomes	.
Blvrb	ENSMUSG00000040466.17	protein_coding	chr7_27100000	768.494	940.615	-0.2899	35.9648	42.7984	0.6692	0.8994	-0.2302	biallelic	Autosomes	.
Blzf1	ENSMUSG00000026577.14	protein_coding	chr1_164100000	301.901	355.954	-0.234	14.5097	16.6328	0.7941	0.7562	0.038	biallelic	Autosomes	.
Bmal1	ENSMUSG00000055116.9	protein_coding	chr7_112800000	492.161	613.069	-0.3141	3.9228	4.7509	0.8201	0.9246	-0.1044	biallelic	Autosomes	.
Bmal2	ENSMUSG00000040187.16	protein_coding	chr6_146650000	24.2315	5.74113	1.4444	0.5497	0.1266	0.5986	0.5609	0.0377	skewed:B6	Autosomes	.
Bmerb1	ENSMUSG00000044117.13	protein_coding	chr16_13850000	335.868	98.5278	1.7192	2.4852	0.7088	0.7834	0.523	0.2604	skewed:B6	Autosomes	.
Bmf	ENSMUSG00000040093.17	protein_coding	chr2_118350000	1038.96	1031.82	0.0099	42.2014	40.7482	0.7767	0.7228	0.0539	biallelic	Autosomes	.
Bmi1	ENSMUSG00000026739.14	protein_coding	chr2_18650000	1689	1256.75	0.425	149.402	108.083	0.7137	0.6788	0.0349	biallelic	Autosomes	.
Bmp1	ENSMUSG00000022098.11	protein_coding	chr14_70700000	7283.93	7829.41	-0.1041	135.573	141.683	0.8297	0.9292	-0.0995	biallelic	Autosomes	.
Bmp2k	ENSMUSG00000034663.14	protein_coding	chr5_97200000	761.385	1082.22	-0.5045	6.8731	9.4982	0.4821	0.7332	-0.2511	biallelic	Autosomes	.
Bmp3	ENSMUSG00000029335.6	protein_coding	chr5_99000000	179.81	68.3297	1.3336	5.0987	1.8838	0.3907	0.4062	-0.0154	skewed:B6	Autosomes	.
Bmp7	ENSMUSG00000008999.8	protein_coding	chr2_172700000	471.578	430.855	0.1289	5.5444	4.9251	0.6496	0.6429	0.0066	biallelic	Autosomes	.
Bmper	ENSMUSG00000031963.9	protein_coding	chr9_23150000	306.896	90.8361	1.7024	0.9954	0.2864	0.6111	0.7148	-0.1038	skewed:B6	Autosomes	.
Bmpr1a	ENSMUSG00000021796.16	protein_coding	chr14_34100000	2659.72	2121.91	0.3252	24.4168	18.939	0.9252	0.7616	0.1636	biallelic	Autosomes	.
Bmpr1b	ENSMUSG00000052430.16	protein_coding	chr3_141600000	917.57	1288.77	-0.4878	2.3476	3.2058	0.5618	0.7036	-0.1418	biallelic	Autosomes	.
Bmpr2	ENSMUSG00000067336.7	protein_coding	chr1_59800000	3711.42	4452.16	-0.2622	27.2914	31.8299	0.9522	0.9874	-0.0352	biallelic	Autosomes	.
Bms1	ENSMUSG00000030138.9	protein_coding	chr6_118350000	1120.51	1376.24	-0.2954	26.3931	31.5172	0.6466	0.8192	-0.1726	biallelic	Autosomes	.
Bmt2	ENSMUSG00000042742.8	protein_coding	chr6_13650000	1170.77	1114.14	0.0712	19.0337	17.6106	0.5262	0.3416	0.1846	biallelic	Autosomes	.
Bmyc	ENSMUSG00000049086.9	protein_coding	chr2_25550000	23.9758	23.2993	0.0341	20.7567	19.6113	0.8558	0.9304	-0.0746	biallelic	Autosomes	.
Bnc2	ENSMUSG00000028487.19	protein_coding	chr4_84500000	14.7958	9.73068	0.4264	0.0314	0.0201	0.6342	0.4785	0.1557	biallelic	Autosomes	.
Bnip1	ENSMUSG00000024191.16	protein_coding	chr17_27000000	402.342	443.301	-0.1382	29.7462	31.865	0.9419	0.8986	0.0432	biallelic	Autosomes	.
Bnip2	ENSMUSG00000011958.18	protein_coding	chr9_69850000	1365.77	1264.64	0.1106	61.5939	55.4506	0.6888	0.6024	0.0864	biallelic	Autosomes	.
Bnip3	ENSMUSG00000078566.9	protein_coding	chr7_138500000	2340.09	2845.24	-0.2814	106.484	125.877	0.6537	0.5201	0.1337	biallelic	Autosomes	.
Bnip3l	ENSMUSG00000022051.16	protein_coding	chr14_67200000	2234.23	2641.3	-0.241	80.3552	92.3597	0.9706	0.936	0.0346	biallelic	Autosomes	.
Bnipl	ENSMUSG00000028115.17	protein_coding	chr3_95100000	5.97379	7.18786	-0.1514	0.5119	0.5988	0.9956	0.8418	0.1538	biallelic	Autosomes	.
Boc	ENSMUSG00000022687.13	protein_coding	chr16_44350000	1129.04	981.388	0.2012	12.9977	10.9844	0.8195	0.9383	-0.1187	biallelic	Autosomes	.
Bod1	ENSMUSG00000044502.17	protein_coding	chr11_31600000	2519.3	2167.38	0.2166	319.478	267.224	0.9413	0.9864	-0.0451	biallelic	Autosomes	.
Bod1l	ENSMUSG00000061755.11	protein_coding	chr5_41950000	1103.7	1165.32	-0.078	16.5263	16.9648	0.4011	0.489	-0.0879	biallelic	Autosomes	.
Bok	ENSMUSG00000026278.15	protein_coding	chr1_93600000	263.536	106.549	1.2674	22.174	8.7163	0.9047	0.791	0.1137	skewed:B6	Autosomes	.
Bola2	ENSMUSG00000047721.9	protein_coding	chr7_126250000	465.331	542.884	-0.2202	89.9709	102.053	0.7869	0.9444	-0.1575	biallelic	Autosomes	.
Bola3	ENSMUSG00000045160.15	protein_coding	chr6_83300000	336.798	282.776	0.2482	26.0559	21.2696	0.8758	0.9221	-0.0462	biallelic	Autosomes	.
Bop1	ENSMUSG00000022557.12	protein_coding	chr15_76300000	357.412	381.78	-0.0939	12.5105	12.9926	0.9918	0.8597	0.1321	biallelic	Autosomes	.
Bora	ENSMUSG00000022070.8	protein_coding	chr14_99300000	504.838	557.429	-0.1416	15.156	16.2706	0.7561	0.8315	-0.0753	biallelic	Autosomes	.
Borcs5	ENSMUSG00000042992.16	protein_coding	chr6_134600000	68.1684	59.5418	0.181	0.8085	0.6866	0.8381	0.7479	0.0902	biallelic	Autosomes	.
Borcs6	ENSMUSG00000045176.4	protein_coding	chr11_68950000	292.462	232.78	0.3231	133.604	103.389	0.9883	0.9894	-0.0011	biallelic	Autosomes	.
Borcs7	ENSMUSG00000062376.8	protein_coding	chr19_46650000	497.445	469.358	0.083	31.382	28.7884	0.9913	0.87	0.1213	biallelic	Autosomes	.
Borcs8	ENSMUSG00000002345.19	protein_coding	chr8_70550000	86.2983	60.7911	0.4727	9.3819	6.4255	0.9083	0.9315	-0.0232	biallelic	Autosomes	.
Bpgm	ENSMUSG00000038871.6	protein_coding	chr6_34450000	1521.6	2412.9	-0.6634	43.9908	67.8232	0.8821	0.7596	0.1225	biallelic	Autosomes	.
Bphl	ENSMUSG00000038286.12	protein_coding	chr13_34200000	949.54	984.916	-0.0525	22.1305	22.318	0.9208	0.853	0.0679	biallelic	Autosomes	.
Bpifb5	ENSMUSG00000038572.8	protein_coding	chr2_154050000	19.133	6.31207	1.0931	0.9479	0.304	0.4751	0.5741	-0.099	skewed:B6	Autosomes	.
Bpnt1	ENSMUSG00000026617.17	protein_coding	chr1_185050000	1244.67	1439.4	-0.2089	41.2893	46.4241	0.9367	0.859	0.0777	biallelic	Autosomes	.
Bpnt2	ENSMUSG00000066324.3	protein_coding	chr4_4750000	6820.02	4082.41	0.7396	187.815	109.305	0.5474	0.4337	0.1137	biallelic	Autosomes	.
Bptf	ENSMUSG00000040481.18	protein_coding	chr11_107000000	2156.88	2217.94	-0.0402	18.5134	18.5092	0.9846	0.8343	0.1504	biallelic	Autosomes	.
Braf	ENSMUSG00000002413.16	protein_coding	chr6_39600000	1067.51	1210.68	-0.1808	7.4252	8.1873	0.7067	0.8741	-0.1674	biallelic	Autosomes	.
Brap	ENSMUSG00000029458.15	protein_coding	chr5_121800000	1247.22	1255.19	-0.0092	39.7231	38.8676	0.8575	0.9692	-0.1118	biallelic	Autosomes	.
Brat1	ENSMUSG00000000148.18	protein_coding	chr5_140650000	526.456	491.346	0.0986	31.1503	28.2661	0.9819	0.79	0.1919	biallelic	Autosomes	.
Brca1	ENSMUSG00000017146.13	protein_coding	chr11_101400000	670.333	633.465	0.081	9.0184	8.286	0.918	0.7831	0.1349	biallelic	Autosomes	.
Brca2	ENSMUSG00000041147.11	protein_coding	chr5_150450000	740.994	797.577	-0.1055	13.2069	13.821	0.6155	0.5013	0.1142	biallelic	Autosomes	.
Brcc3	ENSMUSG00000031201.18	protein_coding	chrX_74450000	841.486	0	7.4034	19.1419	0	0.8195	0.7626	0.0569	mono:B6	X	.
Brd10	ENSMUSG00000046138.16	protein_coding	chr19_29650000	750.625	746.723	0.0075	6.9676	6.7391	0.7056	0.669	0.0367	biallelic	Autosomes	.
Brd2	ENSMUSG00000024335.21	protein_coding	chr17_34300000	3717.81	3812.94	-0.0364	297.871	297.015	0.9961	0.9274	0.0687	biallelic	Autosomes	.
Brd3	ENSMUSG00000026918.17	protein_coding	chr2_27300000	1799.13	1671.02	0.1063	24.6369	22.2477	0.9834	0.9332	0.0502	biallelic	Autosomes	.
Brd3os	ENSMUSG00000109946.2	protein_coding	chr2_27300000	224.413	167.846	0.4085	100.572	73.134	0.9834	0.9332	0.0502	biallelic	Autosomes	.
Brd7	ENSMUSG00000031660.15	protein_coding	chr8_89050000	872.725	853.326	0.0322	23.8147	22.6393	0.9317	0.9614	-0.0297	biallelic	Autosomes	.
Brd8	ENSMUSG00000003778.15	protein_coding	chr18_34750000	1257.58	1134.25	0.1483	41.1427	36.0783	0.9152	0.9799	-0.0647	biallelic	Autosomes	.
Brd8dc	ENSMUSG00000049357.12	protein_coding	chr18_34700000	39.4522	36.4186	0.102	1.9033	1.7082	0.9459	0.9929	-0.047	biallelic	Autosomes	.
Brd9	ENSMUSG00000057649.7	protein_coding	chr13_74100000	1729.43	1575.02	0.1345	63.6926	56.3963	0.5926	0.8753	-0.2827	biallelic	Autosomes	.
Brdt	ENSMUSG00000029279.16	protein_coding	chr5_107450000	248.767	311.6	-0.3192	3.7834	4.6075	0.5706	0.6607	-0.0901	biallelic	Autosomes	.
Brf1	ENSMUSG00000011158.9	protein_coding	chr12_112950000	637.855	575.71	0.1467	13.3502	11.7152	0.955	0.8459	0.1091	biallelic	Autosomes	.
Brf2	ENSMUSG00000031487.6	protein_coding	chr8_27600000	186.295	128.99	0.5137	29.7928	20.0562	0.7934	0.6517	0.1417	biallelic	Autosomes	.
Bri3	ENSMUSG00000047843.17	protein_coding	chr5_144300000	179.387	130.049	0.4492	0.7538	0.5313	0.5337	0.3416	0.1921	biallelic	Autosomes	.
Bri3bp	ENSMUSG00000037905.14	protein_coding	chr5_125500000	1822.64	1508.94	0.2717	82.4125	66.3352	0.9656	0.8856	0.08	biallelic	Autosomes	.
Bricd5	ENSMUSG00000045744.12	protein_coding	chr17_24650000	15.0318	7.7359	0.6534	8.0627	4.0342	0.9279	0.8899	0.038	biallelic	Autosomes	.
Brinp1	ENSMUSG00000028351.6	protein_coding	chr4_68650000	32.4063	15.9511	0.8363	0.1428	0.0684	0.3854	0.1804	0.2049	biallelic	Autosomes	.
Brinp2	ENSMUSG00000004031.14	protein_coding	chr1_158150000	2410.83	2505.52	-0.0555	18.4551	18.6478	0.67	0.4959	0.1741	biallelic	Autosomes	.
Brinp3	ENSMUSG00000035131.15	protein_coding	chr1_146750000	269.007	127.702	1.046	0.5609	0.2589	0.1207	0.3196	-0.1989	biallelic	Autosomes	.
Brip1	ENSMUSG00000034329.17	protein_coding	chr11_86000000	226.038	307.237	-0.4345	1.3433	1.7752	0.7328	0.877	-0.1442	biallelic	Autosomes	.
Brip1os	ENSMUSG00000085208.6	lncRNA	chr11_86150000	3194.33	2297.16	0.4748	26.3248	18.4058	0.977	0.769	0.208	biallelic	Autosomes	.
Brix1	ENSMUSG00000022247.13	protein_coding	chr15_10450000	1439.14	1499.25	-0.0588	109.553	110.962	0.6255	0.4546	0.1709	biallelic	Autosomes	.
Brk1	ENSMUSG00000033940.9	protein_coding	chr6_113550000	3855.56	2832.65	0.4441	269.136	192.246	0.8434	0.8912	-0.0478	biallelic	Autosomes	.
Brme1	ENSMUSG00000008129.15	protein_coding	chr8_84850000	16.271	15.2815	0.0687	0.5631	0.5142	0.9559	0.9051	0.0507	biallelic	Autosomes	.
Brms1l	ENSMUSG00000012076.9	protein_coding	chr12_55850000	1320.03	1100.79	0.2609	33.5875	27.232	0.5413	0.6228	-0.0815	biallelic	Autosomes	.
Brox	ENSMUSG00000046836.14	protein_coding	chr1_183050000	1438.52	2081.39	-0.5314	58.5231	82.3276	0.907	0.9911	-0.0841	biallelic	Autosomes	.
Brpf1	ENSMUSG00000001632.17	protein_coding	chr6_113300000	211.885	253.336	-0.2523	10.1639	11.815	0.8721	0.9395	-0.0674	biallelic	Autosomes	.
Brsk1	ENSMUSG00000035390.17	protein_coding	chr7_4700000	378.907	398.66	-0.0724	12.6857	12.9767	0.7807	0.9435	-0.1627	biallelic	Autosomes	.
Brsk2	ENSMUSG00000053046.17	protein_coding	chr7_141500000	158.428	173.36	-0.1261	2.4715	2.6294	0.9289	0.674	0.2549	biallelic	Autosomes	.
Brwd1	ENSMUSG00000022914.18	protein_coding	chr16_95800000	1503.93	1414.9	0.0877	14.1381	12.9321	0.9346	0.8063	0.1283	biallelic	Autosomes	.
Brwd3	ENSMUSG00000063663.12	protein_coding	chrX_107800000	1087.43	5.26888	6.7331	9.4958	0.0447	0.5919	0.1967	0.3952	mono:B6	X	.
Bscl2	ENSMUSG00000071657.13	protein_coding	chr19_8800000	479.882	472.022	0.0236	36.3741	34.7856	0.8946	0.8578	0.0369	biallelic	Autosomes	.
Bsdc1	ENSMUSG00000040859.15	protein_coding	chr4_129350000	917.012	864.016	0.0854	28.9631	26.532	0.9255	0.9891	-0.0636	biallelic	Autosomes	.
Bsg	ENSMUSG00000023175.16	protein_coding	chr10_79500000	12455.5	12239.5	0.0252	1416.03	1352.87	0.951	0.8113	0.1397	biallelic	Autosomes	.
Bsn	ENSMUSG00000032589.15	protein_coding	chr9_108050000	80.2438	42.6391	0.8394	0.723	0.3735	0.9988	0.8738	0.1249	biallelic	Autosomes	.
Btaf1	ENSMUSG00000040565.9	protein_coding	chr19_36900000	550.876	586.986	-0.0908	5.4034	5.5978	0.8804	0.8236	0.0568	biallelic	Autosomes	.
Btbd1	ENSMUSG00000025103.9	protein_coding	chr7_81400000	1756.86	1577.28	0.1551	39.9817	34.899	0.7541	0.914	-0.1599	biallelic	Autosomes	.
Btbd10	ENSMUSG00000038187.15	protein_coding	chr7_112900000	531.108	553.573	-0.0592	8.3979	8.5103	0.7939	0.8932	-0.0993	biallelic	Autosomes	.
Btbd19	ENSMUSG00000073771.12	protein_coding	chr4_116950000	82.2029	93.4934	-0.1757	10.7416	11.878	0.8462	0.9935	-0.1473	biallelic	Autosomes	.
Btbd2	ENSMUSG00000003344.16	protein_coding	chr10_80450000	859.908	741.434	0.2125	52.6809	44.1623	0.9415	0.8811	0.0604	biallelic	Autosomes	.
Btbd3	ENSMUSG00000062098.12	protein_coding	chr2_138250000	571.763	756.454	-0.4008	1.4609	1.8792	0.1732	0.4207	-0.2475	biallelic	Autosomes	.
Btbd6	ENSMUSG00000002803.15	protein_coding	chr12_112900000	99.8352	101.672	-0.0251	34.46	34.1201	0.8684	0.8225	0.0459	biallelic	Autosomes	.
Btbd7	ENSMUSG00000041702.8	protein_coding	chr12_102750000	674.736	666.236	0.0182	5.8729	5.638	0.8477	0.6029	0.2448	biallelic	Autosomes	.
Btbd8	ENSMUSG00000111375.6	protein_coding	chr5_107600000	124.44	117.894	0.0749	1.4451	1.3311	0.5287	0.7927	-0.264	biallelic	Autosomes	.
Btbd9	ENSMUSG00000062202.15	protein_coding	chr17_30700000	756.149	647.913	0.2213	1.7809	1.4836	0.9195	0.5827	0.3367	biallelic	Autosomes	.
Btd	ENSMUSG00000021900.11	protein_coding	chr14_31350000	1097.8	1317.86	-0.2625	33.8753	39.5373	0.9563	0.8189	0.1374	biallelic	Autosomes	.
Btf3	ENSMUSG00000021660.15	protein_coding	chr13_98400000	3072.31	1685.46	0.8643	367.36	195.941	0.8371	0.7618	0.0753	biallelic	Autosomes	.
Btf3l4	ENSMUSG00000028568.17	protein_coding	chr4_108650000	896.868	1115.98	-0.3138	39.4675	47.7469	0.8315	0.8377	-0.0062	biallelic	Autosomes	.
Btg1	ENSMUSG00000036478.9	protein_coding	chr10_96450000	1568.33	1804.8	-0.202	229.764	257.07	0.6711	0.6645	0.0066	biallelic	Autosomes	.
Btg2	ENSMUSG00000020423.7	protein_coding	chr1_134000000	12087.2	19182.3	-0.6661	2601.51	4014	0.9683	0.9	0.0683	biallelic	Autosomes	.
Btg3	ENSMUSG00000022863.16	protein_coding	chr16_78150000	60.2276	245.559	-1.9416	1.1492	4.5555	0.3949	0.4806	-0.0857	skewed:CAST	Autosomes	.
Btrc	ENSMUSG00000025217.16	protein_coding	chr19_45450000	1369.2	1436.52	-0.069	7.0004	7.1409	0.71	0.9451	-0.2351	biallelic	Autosomes	.
Bub1	ENSMUSG00000027379.15	protein_coding	chr2_127650000	922.379	892.997	0.0464	25.502	24.0046	0.9918	0.6493	0.3425	biallelic	Autosomes	.
Bub1b	ENSMUSG00000040084.10	protein_coding	chr2_118450000	1801.63	1732.93	0.0559	35.3078	33.0193	0.9246	0.942	-0.0174	biallelic	Autosomes	.
Bub3	ENSMUSG00000066979.7	protein_coding	chr7_131150000	1065.47	1106.31	-0.054	77.5989	78.3376	0.5853	0.5628	0.0225	biallelic	Autosomes	.
Bud13	ENSMUSG00000032077.6	protein_coding	chr9_46150000	204.364	246.301	-0.2634	10.79	12.6433	0.9452	0.8864	0.0588	biallelic	Autosomes	.
Bud23	ENSMUSG00000005378.18	protein_coding	chr5_135050000	735.574	774.635	-0.0742	52.1037	53.3481	0.9341	0.9959	-0.0618	biallelic	Autosomes	.
Bud31	ENSMUSG00000038722.18	protein_coding	chr5_145050000	1991.71	1845.36	0.1098	219.447	197.68	0.847	0.8064	0.0406	biallelic	Autosomes	.
Bves	ENSMUSG00000071317.5	protein_coding	chr10_45200000	130.961	223.044	-0.7461	3.0331	5.0225	0.6149	0.55	0.0649	biallelic	Autosomes	.
Bvht	ENSMUSG00000098098.10	lncRNA	chr18_61750000	18.1299	39.9888	-0.9598	0.4666	1.0006	0.9734	0.7979	0.1755	biallelic	Autosomes	.
Bysl	ENSMUSG00000023988.9	protein_coding	chr17_47900000	806.029	763.321	0.078	56.3479	51.8815	0.8902	0.9424	-0.0522	biallelic	Autosomes	.
Bzw1	ENSMUSG00000051223.15	protein_coding	chr1_58400000	966.969	1219.9	-0.3337	56.8709	69.7562	0.961	0.9129	0.0481	biallelic	Autosomes	.
Bzw2	ENSMUSG00000020547.6	protein_coding	chr12_36200000	2657.55	3163.5	-0.251	34.1056	39.4721	0.5376	0.4097	0.1279	biallelic	Autosomes	.
C030005K06Rik	ENSMUSG00000086600.9	lncRNA	chr18_50150000	12.3783	2.46703	1.2187	0.9469	0.1835	0.9613	0.5842	0.377	skewed:B6	Autosomes	.
C030010C08Rik	ENSMUSG00000121054.2	lncRNA	chr13_63950000	6.49897	11.2232	-0.4966	3.6736	6.168	0.7696	0.5713	0.1983	biallelic	Autosomes	.
C030010L15Rik	ENSMUSG00000097874.6	lncRNA	chr16_97750000	13.0924	9.79939	0.2898	0.2495	0.1816	0.724	0.5848	0.1391	biallelic	Autosomes	.
C030013E06Rik	ENSMUSG00000120603.2	lncRNA	chr11_102200000	13.2674	8.96942	0.387	3.2025	2.105	0.908	0.965	-0.057	biallelic	Autosomes	.
C030014O09Rik	ENSMUSG00000121224.2	lncRNA	chr2_130650000	3.8927	11.2003	-0.8653	2.2683	6.3453	0.9567	0.9207	0.0361	skewed:CAST	Autosomes	.
C030034I22Rik	ENSMUSG00000073374.6	lncRNA	chr17_69700000	84.0893	45.959	0.8059	15.8161	8.4044	0.5006	0.5677	-0.0672	biallelic	Autosomes	.
C030034L19Rik	ENSMUSG00000097365.9	lncRNA	chr3_9550000	104.243	44.8612	1.1315	0.9932	0.4156	0.716	0.8236	-0.1077	skewed:B6	Autosomes	.
C130013H08Rik	ENSMUSG00000105509.3	lncRNA	chr3_110150000	180.305	93.8582	0.9065	3.9082	1.978	0.2823	0.3496	-0.0672	biallelic	Autosomes	.
C130036L24Rik	ENSMUSG00000073627.9	lncRNA	chr1_86300000	76.7819	60.9515	0.3104	4.3605	3.3654	0.795	0.9656	-0.1706	biallelic	Autosomes	.
C130046K22Rik	ENSMUSG00000085154.10	lncRNA	chr11_103600000	184.387	2.04059	4.7495	5.9082	0.0636	0.8561	0.6811	0.1749	mono:B6	Autosomes	.
C130060C02Rik	ENSMUSG00000097557.5	lncRNA	chr19_15950000	53.9981	109.415	-0.9555	1.4728	2.9014	0.7792	0.8212	-0.042	biallelic	Autosomes	.
C1d	ENSMUSG00000000581.9	protein_coding	chr11_17200000	167.598	158.304	0.0799	12.2863	11.2829	0.6434	0.6469	-0.0036	biallelic	Autosomes	.
C1galt1	ENSMUSG00000042460.6	protein_coding	chr6_7850000	1507.72	932.638	0.69	41.5559	24.9922	0.3987	0.3443	0.0544	biallelic	Autosomes	.
C1qbp	ENSMUSG00000018446.9	protein_coding	chr11_70850000	1395.96	1463.94	-0.0684	228.666	233.148	0.789	0.9161	-0.1272	biallelic	Autosomes	.
C1ql1	ENSMUSG00000045532.6	protein_coding	chr11_102800000	119.934	109.95	0.1202	13.7341	12.2415	0.961	0.9905	-0.0295	biallelic	Autosomes	.
C1ql3	ENSMUSG00000049630.7	protein_coding	chr2_13000000	70.6526	90.1806	-0.3313	7.1943	8.928	0.3085	0.4663	-0.1579	biallelic	Autosomes	.
C1qtnf1	ENSMUSG00000017446.15	protein_coding	chr11_118300000	11.7253	13.0735	-0.1118	0.4581	0.4966	0.973	0.919	0.054	biallelic	Autosomes	.
C1qtnf12	ENSMUSG00000023571.5	protein_coding	chr4_156000000	89.2997	396.022	-2.0884	17.6104	75.9305	0.7513	0.9687	-0.2173	skewed:CAST	Autosomes	.
C1qtnf3	ENSMUSG00000058914.13	protein_coding	chr15_10950000	6.2767	5.93144	0.0449	0.1918	0.1762	0.7152	0.5445	0.1707	biallelic	Autosomes	.
C1qtnf6	ENSMUSG00000022440.10	protein_coding	chr15_78400000	1657.84	1871.67	-0.1745	174.649	191.704	0.9466	0.9324	0.0141	biallelic	Autosomes	.
C1ra	ENSMUSG00000055172.11	protein_coding	chr6_124500000	0.397333	12.4796	-1.6954	0.0306	0.9345	0.2761	0.6614	-0.3853	mono:CAST	Autosomes	.
C1rl	ENSMUSG00000038527.10	protein_coding	chr6_124450000	5.13191	26.1699	-1.6212	0.2489	1.2339	0.5442	0.5817	-0.0375	skewed:CAST	Autosomes	.
C1s1	ENSMUSG00000038521.18	protein_coding	chr6_124500000	12.9979	29.5656	-0.9415	0.9198	2.0341	0.2761	0.6614	-0.3853	biallelic	Autosomes	.
C1s2	ENSMUSG00000079343.5	protein_coding	chr6_124600000	7.16579	5.12437	0.265	0.5316	0.3696	0.7041	0.8344	-0.1303	biallelic	Autosomes	.
C2	ENSMUSG00000024371.15	protein_coding	chr17_35100000	9.32752	9.35005	-0.0023	0.2224	0.2167	0.9371	0.8421	0.095	biallelic	Autosomes	.
C230012O17Rik	ENSMUSG00000046219.10	lncRNA	chr4_24950000	6.84909	10.4162	-0.3797	0.8744	1.2929	0.4042	0.5862	-0.1821	biallelic	Autosomes	.
C230013L11Rik	ENSMUSG00000117171.2	lncRNA	chr17_28350000	50.2136	48.9512	0.0334	14.1121	13.3756	0.9728	0.9895	-0.0167	biallelic	Autosomes	.
C230034O21Rik	ENSMUSG00000086181.3	lncRNA	chr3_38900000	21.3419	15.2586	0.3788	1.2928	0.8986	0.6446	0.7371	-0.0926	biallelic	Autosomes	.
C230057A21Rik	ENSMUSG00000103346.3	lncRNA	chr3_8750000	14.426	23.9619	-0.5762	2.9913	4.8307	0.8649	0.7682	0.0967	biallelic	Autosomes	.
C230072F16Rik	ENSMUSG00000112121.4	lncRNA	chr17_81200000	14.6483	24.6703	-0.5946	0.3428	0.5612	0.924	0.6669	0.257	biallelic	Autosomes	.
C2cd2	ENSMUSG00000045975.9	protein_coding	chr16_97750000	573.288	535.668	0.097	4.5385	4.123	0.724	0.5848	0.1391	biallelic	Autosomes	.
C2cd2l	ENSMUSG00000032120.12	protein_coding	chr9_44200000	238.32	259.184	-0.1187	18.3389	19.391	0.9895	0.9418	0.0476	biallelic	Autosomes	.
C2cd3	ENSMUSG00000047248.21	protein_coding	chr7_100050000	1454.41	1150.99	0.3363	12.6275	9.7158	0.8804	0.8228	0.0576	biallelic	Autosomes	.
C2cd4c	ENSMUSG00000045912.10	protein_coding	chr10_79400000	5.75152	6.33498	-0.0762	0.6819	0.7302	0.657	0.777	-0.1201	biallelic	Autosomes	.
C3	ENSMUSG00000024164.16	protein_coding	chr17_57500000	9.23309	9.49455	-0.0263	0.3248	0.3247	0.6891	0.5515	0.1376	biallelic	Autosomes	.
C330002G04Rik	ENSMUSG00000097930.5	lncRNA	chr19_23000000	0.397333	33.3877	-2.8303	0.0029	0.239	0.9276	0.8352	0.0923	mono:CAST	Autosomes	.
C330011M18Rik	ENSMUSG00000056753.5	lncRNA	chr8_84750000	58.3767	48.4789	0.245	24.1975	19.5372	0.801	0.8637	-0.0627	biallelic	Autosomes	.
C330013E15Rik	ENSMUSG00000097093.5	lncRNA	chr15_100500000	74.6477	35.7561	0.9666	14.971	6.9721	0.9564	0.9994	-0.0429	biallelic	Autosomes	.
C330018D20Rik	ENSMUSG00000024592.16	protein_coding	chr18_57100000	3.40094	774.096	-6.5351	0.148	32.7534	0.7805	0.8693	-0.0888	mono:CAST	Autosomes	.
C430014B12Rik	ENSMUSG00000097564.4	lncRNA	chr1_82650000	20.1165	16.1802	0.2459	0.5143	0.4022	0.2618	0.7096	-0.4478	biallelic	Autosomes	.
C4a	ENSMUSG00000015451.18	protein_coding	chr17_35000000	7.02415	48.9212	-2.1649	0.4155	2.8137	0.9801	0.9592	0.021	skewed:CAST	Autosomes	.
C4b	ENSMUSG00000073418.5	protein_coding	chr17_34950000	10.4861	20.9468	-0.7446	0.5751	1.1169	0.8771	0.7841	0.093	biallelic	Autosomes	.
C530005A16Rik	ENSMUSG00000085408.4	lncRNA	chr4_116400000	46.0652	20.4059	1.0072	4.9354	2.1256	0.8912	0.8156	0.0756	biallelic	Autosomes	.
C530044C16Rik	ENSMUSG00000107667.4	lncRNA	chr6_50750000	93.767	46.789	0.9314	1.1368	0.5515	0.877	0.947	-0.07	biallelic	Autosomes	.
C630043F03Rik	ENSMUSG00000084910.4	lncRNA	chr4_72100000	160.185	81.4789	0.9337	9.5298	4.7129	0.4361	0.5452	-0.1091	biallelic	Autosomes	.
C78197	ENSMUSG00000087242.3	lncRNA	chr11_68050000	48.341	25.2254	0.8195	10.3781	5.2652	0.9894	0.9595	0.03	biallelic	Autosomes	.
C78859	ENSMUSG00000110710.2	lncRNA	chr8_95050000	10.3917	8.16234	0.2257	1.4868	1.1354	0.7705	0.8386	-0.0681	biallelic	Autosomes	.
C87436	ENSMUSG00000046679.17	protein_coding	chr6_86450000	111.997	115.224	-0.0393	2.7107	2.7114	0.9576	0.8156	0.1419	biallelic	Autosomes	.
C8g	ENSMUSG00000015083.12	protein_coding	chr2_25350000	70.4383	40.0276	0.7445	19.5187	10.784	0.8999	0.9557	-0.0557	biallelic	Autosomes	.
C920006O11Rik	ENSMUSG00000121490.2	lncRNA	chr9_78050000	31.0472	13.8577	0.9347	8.7865	3.813	0.7978	0.7492	0.0485	biallelic	Autosomes	.
C920021L13Rik	ENSMUSG00000080727.5	lncRNA	chr3_95750000	41.189	25.1038	0.6176	1.9549	1.1584	0.984	0.8349	0.1491	biallelic	Autosomes	.
C9orf72	ENSMUSG00000028300.15	protein_coding	chr4_35200000	558.203	585.393	-0.068	13.6015	13.8683	0.5484	0.6319	-0.0835	biallelic	Autosomes	.
CJ186046Rik	ENSMUSG00000117422.2	lncRNA	chr17_86000000	5.52925	7.54559	-0.2528	0.2423	0.3215	0.7153	0.8193	-0.104	biallelic	Autosomes	.
CK137956	ENSMUSG00000028813.3	protein_coding	chr4_127800000	17.9214	16.1344	0.1171	0.3514	0.3076	0.3095	0.6303	-0.3208	biallelic	Autosomes	.
Caap1	ENSMUSG00000028578.9	protein_coding	chr4_94350000	410.653	439.005	-0.0952	6.1556	6.398	0.5217	0.4829	0.0388	biallelic	Autosomes	.
Cab39	ENSMUSG00000036707.17	protein_coding	chr1_85750000	1325.38	2037.76	-0.6187	19.3821	28.9728	0.8596	0.668	0.1916	biallelic	Autosomes	.
Cab39l	ENSMUSG00000021981.11	protein_coding	chr14_59650000	771.616	847.494	-0.1345	4.5306	4.838	0.5603	0.8046	-0.2443	biallelic	Autosomes	.
Cabin1	ENSMUSG00000020196.11	protein_coding	chr10_75600000	1513.96	1662.86	-0.1349	10.8865	11.6254	0.842	0.7025	0.1395	biallelic	Autosomes	.
Cables1	ENSMUSG00000040957.16	protein_coding	chr18_12050000	246.487	426.482	-0.7788	1.9693	3.3128	0.8052	0.8756	-0.0704	biallelic	Autosomes	.
Cables2	ENSMUSG00000038990.15	protein_coding	chr2_179900000	612.852	640.253	-0.0626	34.8367	35.3843	0.7957	0.7843	0.0114	biallelic	Autosomes	.
Cabp1	ENSMUSG00000029544.17	protein_coding	chr5_115300000	31.2753	8.73329	1.4013	1.0349	0.281	0.9442	0.8672	0.0771	skewed:B6	Autosomes	.
Cabp5	ENSMUSG00000005649.18	protein_coding	chr7_13100000	0.397333	24.3196	-2.4415	0.0314	1.8691	0.3561	0.414	-0.0579	mono:CAST	Autosomes	.
Cabp7	ENSMUSG00000009075.3	protein_coding	chr11_4650000	33.559	16.8198	0.8214	2.8859	1.4063	0.9777	0.9842	-0.0066	biallelic	Autosomes	.
Cabyr	ENSMUSG00000024430.15	protein_coding	chr18_12850000	18.5744	30.1066	-0.5745	1.0571	1.6659	0.7438	0.8393	-0.0955	biallelic	Autosomes	.
Cacfd1	ENSMUSG00000015488.15	protein_coding	chr2_26900000	1838.78	1811.7	0.0213	140.037	134.147	0.9183	0.8125	0.1058	biallelic	Autosomes	.
Cachd1	ENSMUSG00000028532.15	protein_coding	chr4_100750000	1263.63	1358.62	-0.1042	4.2538	4.4467	0.6315	0.8327	-0.2012	biallelic	Autosomes	.
Cacna1a	ENSMUSG00000034656.19	protein_coding	chr8_85150000	391.461	345.169	0.1791	1.1034	0.9459	0.9986	0.8596	0.1391	biallelic	Autosomes	.
Cacna1b	ENSMUSG00000004113.20	protein_coding	chr2_24650000	381.658	151.107	1.3085	2.0373	0.7842	0.7137	0.8669	-0.1532	skewed:B6	Autosomes	.
Cacna1c	ENSMUSG00000051331.17	protein_coding	chr6_119150000	133.095	213.404	-0.6613	0.1856	0.2893	0.9584	0.7121	0.2463	biallelic	Autosomes	.
Cacna1d	ENSMUSG00000015968.19	protein_coding	chr14_29750000	87.799	89.5867	-0.0275	0.1653	0.164	0.5279	0.7614	-0.2335	biallelic	Autosomes	.
Cacna1g	ENSMUSG00000020866.18	protein_coding	chr11_94350000	402.801	416.764	-0.0486	5.2037	5.2347	0.976	0.8081	0.1679	biallelic	Autosomes	.
Cacna1h	ENSMUSG00000024112.18	protein_coding	chr17_25550000	351.227	258.129	0.437	5.0184	3.5859	0.8958	0.8104	0.0854	biallelic	Autosomes	.
Cacna2d1	ENSMUSG00000040118.17	protein_coding	chr5_16250000	414.852	998.598	-1.2572	0.8021	1.8771	0.2813	0.5234	-0.242	skewed:CAST	Autosomes	.
Cacna2d2	ENSMUSG00000010066.17	protein_coding	chr9_107250000	57.999	31.941	0.7701	0.3801	0.2035	0.6437	0.7574	-0.1137	biallelic	Autosomes	.
Cacna2d3	ENSMUSG00000021991.10	protein_coding	chr14_29250000	37.8687	53.5275	-0.4492	0.0394	0.0542	0.425	0.7002	-0.2753	biallelic	Autosomes	.
Cacnb1	ENSMUSG00000020882.19	protein_coding	chr11_97900000	228.792	270.545	-0.2371	9.0359	10.3885	0.9455	0.7843	0.1611	biallelic	Autosomes	.
Cacnb2	ENSMUSG00000057914.16	protein_coding	chr2_14750000	365.05	646.836	-0.8168	0.8065	1.3894	0.1689	0.5029	-0.3339	biallelic	Autosomes	.
Cacnb3	ENSMUSG00000003352.15	protein_coding	chr15_98500000	843.955	804.044	0.0695	52.4136	48.5493	0.988	0.8012	0.1868	biallelic	Autosomes	.
Cacnb4	ENSMUSG00000017412.17	protein_coding	chr2_52450000	24.6623	32.7023	-0.346	0.0844	0.1088	0.7805	0.5925	0.188	biallelic	Autosomes	.
Cacng4	ENSMUSG00000020723.4	protein_coding	chr11_107600000	1324.83	1717.45	-0.3732	18.1078	22.8228	0.803	0.882	-0.079	biallelic	Autosomes	.
Cacng5	ENSMUSG00000040373.13	protein_coding	chr11_107800000	1842.05	3015.22	-0.7094	38.7151	61.6135	0.7921	0.6988	0.0933	biallelic	Autosomes	.
Cacng6	ENSMUSG00000078815.9	protein_coding	chr7_3450000	49.3579	59.6105	-0.2493	3.6577	4.295	0.6656	0.5928	0.0728	biallelic	Autosomes	.
Cacng7	ENSMUSG00000069806.6	protein_coding	chr7_3400000	1652.09	1481.22	0.157	39.8267	34.7168	0.8712	0.7392	0.132	biallelic	Autosomes	.
Cacng8	ENSMUSG00000053395.16	protein_coding	chr7_3400000	284.01	230.463	0.2956	9.6716	7.6304	0.8712	0.7392	0.132	biallelic	Autosomes	.
Cacul1	ENSMUSG00000033417.17	protein_coding	chr19_60550000	2146.05	2043.45	0.0705	32.3895	29.9852	0.5593	0.6389	-0.0796	biallelic	Autosomes	.
Cacybp	ENSMUSG00000014226.11	protein_coding	chr1_160000000	456.985	744.081	-0.6973	36.9725	58.5296	1	0.7528	0.2472	biallelic	Autosomes	.
Cad	ENSMUSG00000013629.17	protein_coding	chr5_31200000	1708.46	1557.6	0.133	61.2874	54.3253	0.8691	0.9986	-0.1295	biallelic	Autosomes	.
Cadm1	ENSMUSG00000032076.21	protein_coding	chr9_47400000	674.653	852.239	-0.3349	1.749	2.148	0.9023	0.698	0.2043	biallelic	Autosomes	.
Cadm2	ENSMUSG00000064115.14	protein_coding	chr16_67000000	1223.45	617.043	0.9818	1.0773	0.5283	0.4988	0.1947	0.3041	biallelic	Autosomes	.
Cadm3	ENSMUSG00000005338.15	protein_coding	chr1_173150000	306.551	350.648	-0.191	7.5681	8.4165	0.3599	0.2374	0.1225	biallelic	Autosomes	.
Cadm4	ENSMUSG00000054793.9	protein_coding	chr7_24150000	3780.62	2921.58	0.3713	142.747	107.251	0.8114	0.8779	-0.0665	biallelic	Autosomes	.
Cadps	ENSMUSG00000054423.16	protein_coding	chr14_9650000	28.8579	21.0068	0.3806	0.0545	0.0385	0.4485	0.2106	0.2379	biallelic	Autosomes	.
Cadps2	ENSMUSG00000017978.20	protein_coding	chr6_23600000	34.6624	277.446	-2.8321	0.0511	0.3977	0.1	0.3423	-0.2423	skewed:CAST	Autosomes	.
Cage1	ENSMUSG00000044566.16	protein_coding	chr13_38200000	75.3342	232.696	-1.565	2.0649	6.201	0.9869	0.6492	0.3377	skewed:CAST	Autosomes	.
Calb1	ENSMUSG00000028222.3	protein_coding	chr4_15850000	4.02055	6.05304	-0.2932	0.1275	0.1867	0.4123	0.6785	-0.2662	biallelic	Autosomes	.
Calb2	ENSMUSG00000003657.10	protein_coding	chr8_110850000	120.467	61.9701	0.9057	3.3351	1.668	0.6446	0.5546	0.09	biallelic	Autosomes	.
Calca	ENSMUSG00000030669.14	protein_coding	chr7_114200000	14.9846	5.86273	0.8795	2.611	0.9932	0.5398	0.459	0.0808	skewed:B6	Autosomes	.
Calcoco1	ENSMUSG00000023055.11	protein_coding	chr15_102600000	2240.11	1870.76	0.2593	123.657	100.402	0.825	0.8043	0.0207	biallelic	Autosomes	.
Calcrl	ENSMUSG00000059588.15	protein_coding	chr2_84200000	90.5861	64.0636	0.4689	0.8125	0.5587	0.5959	0.191	0.4049	biallelic	Autosomes	.
Cald1	ENSMUSG00000029761.17	protein_coding	chr6_34700000	8317.62	6231.74	0.4162	39.9566	29.1057	0.7867	0.971	-0.1844	biallelic	Autosomes	.
Calm1	ENSMUSG00000001175.17	protein_coding	chr12_100150000	12280.5	10885.4	0.1739	1005.9	866.893	0.7386	0.8519	-0.1132	biallelic	Autosomes	.
Calm2	ENSMUSG00000036438.15	protein_coding	chr17_87750000	111.197	171.973	-0.607	6.9906	10.5115	0.7133	0.8589	-0.1456	biallelic	Autosomes	.
Calm3	ENSMUSG00000019370.11	protein_coding	chr7_16650000	11003	11466.9	-0.0595	1070.89	1085.07	0.9634	0.7776	0.1857	biallelic	Autosomes	.
Calml4	ENSMUSG00000032246.15	protein_coding	chr9_62750000	106.299	181.154	-0.7421	5.0653	8.3927	0.993	0.973	0.02	biallelic	Autosomes	.
Calr	ENSMUSG00000003814.9	protein_coding	chr8_85550000	4865.52	4856.7	0.0026	813.616	789.608	0.9865	0.9496	0.0369	biallelic	Autosomes	.
Calr4	ENSMUSG00000028558.15	protein_coding	chr4_109050000	167.3	146.917	0.1816	7.0811	6.0458	0.803	0.6539	0.1491	biallelic	Autosomes	.
Calu	ENSMUSG00000029767.17	protein_coding	chr6_29300000	12644	13156.4	-0.0573	370.142	374.457	0.9657	0.7775	0.1882	biallelic	Autosomes	.
Camk1	ENSMUSG00000030272.16	protein_coding	chr6_113300000	96.1313	91.8564	0.0623	8.2887	7.7003	0.8721	0.9395	-0.0674	biallelic	Autosomes	.
Camk1d	ENSMUSG00000039145.17	protein_coding	chr2_5250000	291.452	11785	-5.3136	0.5885	23.1346	0.8432	0.6085	0.2348	mono:CAST	Autosomes	.
Camk1g	ENSMUSG00000016179.12	protein_coding	chr1_193050000	77.1909	101.791	-0.3777	2.7398	3.5127	0.9184	0.6239	0.2946	biallelic	Autosomes	.
Camk2a	ENSMUSG00000024617.17	protein_coding	chr18_61050000	665.398	301.226	1.1304	9.0461	3.9815	0.9461	0.8507	0.0954	biallelic	Autosomes	.
Camk2b	ENSMUSG00000057897.16	protein_coding	chr11_5900000	2554.17	1882.12	0.4395	22.4511	16.0848	0.9898	0.9468	0.043	biallelic	Autosomes	.
Camk2d	ENSMUSG00000053819.17	protein_coding	chr3_126600000	600.537	504.168	0.2501	2.042	1.6667	0.4428	0.5403	-0.0975	biallelic	Autosomes	.
Camk2g	ENSMUSG00000021820.19	protein_coding	chr14_20750000	661.481	697.028	-0.075	9.4972	9.7299	0.876	0.9923	-0.1163	biallelic	Autosomes	.
Camk2n2	ENSMUSG00000051146.4	protein_coding	chr16_20400000	72.9778	35.6574	0.9395	29.9431	14.2244	0.9698	0.8006	0.1692	biallelic	Autosomes	.
Camk4	ENSMUSG00000038128.8	protein_coding	chr18_33200000	72.234	89.6009	-0.2926	0.2396	0.289	0.4962	0.7076	-0.2113	biallelic	Autosomes	.
Camkk2	ENSMUSG00000029471.14	protein_coding	chr5_122850000	1743.34	1261.17	0.4655	30.7242	21.6097	0.8576	0.9272	-0.0696	biallelic	Autosomes	.
Camkmt	ENSMUSG00000071037.7	protein_coding	chr17_85650000	551.386	397.095	0.4685	1.2737	0.8918	0.5819	0.7147	-0.1328	biallelic	Autosomes	.
Camkv	ENSMUSG00000032936.14	protein_coding	chr9_107800000	70.6526	91.8634	-0.3566	4.2852	5.417	0.9569	0.9415	0.0153	biallelic	Autosomes	.
Caml	ENSMUSG00000021501.5	protein_coding	chr13_55750000	1255.98	1122.97	0.1608	113.521	98.6822	0.9535	0.8731	0.0804	biallelic	Autosomes	.
Camsap1	ENSMUSG00000026933.19	protein_coding	chr2_25850000	771.471	752.436	0.0358	11.6198	11.0186	0.8455	0.9859	-0.1404	biallelic	Autosomes	.
Camsap2	ENSMUSG00000041570.15	protein_coding	chr1_136250000	1738.31	2607.79	-0.5838	18.9511	27.6413	0.8879	0.7989	0.089	biallelic	Autosomes	.
Camsap3	ENSMUSG00000044433.17	protein_coding	chr8_3600000	21.6448	14.6418	0.4399	0.8448	0.5556	0.8191	0.5863	0.2328	biallelic	Autosomes	.
Camta1	ENSMUSG00000014592.23	protein_coding	chr4_151800000	657.588	805.899	-0.2914	0.6968	0.8302	0.5394	0.9296	-0.3902	biallelic	Autosomes	.
Camta2	ENSMUSG00000040712.17	protein_coding	chr11_70550000	268.478	276.589	-0.0422	12.2437	12.2636	0.9091	0.9762	-0.0672	biallelic	Autosomes	.
Cand2	ENSMUSG00000030319.9	protein_coding	chr6_115750000	433.647	567.595	-0.3845	11.8851	15.1247	0.9934	0.8839	0.1095	biallelic	Autosomes	.
Cant1	ENSMUSG00000025575.15	protein_coding	chr11_118300000	1868.43	1810.73	0.0451	124.126	116.956	0.973	0.919	0.054	biallelic	Autosomes	.
Canx	ENSMUSG00000020368.16	protein_coding	chr11_50200000	11063.6	11357.9	-0.0378	296.6	296.039	0.9436	0.6514	0.2922	biallelic	Autosomes	.
Cap1	ENSMUSG00000028656.15	protein_coding	chr4_122750000	2106.59	2242.78	-0.0902	66.3082	68.6362	0.704	0.6922	0.0119	biallelic	Autosomes	.
Cap2	ENSMUSG00000021373.17	protein_coding	chr13_46650000	120.703	205.835	-0.7461	0.6913	1.1462	0.8152	0.9761	-0.1608	biallelic	Autosomes	.
Capg	ENSMUSG00000056737.15	protein_coding	chr6_72500000	29.9968	39.594	-0.3496	1.3717	1.7603	0.9401	0.8316	0.1085	biallelic	Autosomes	.
Capn1	ENSMUSG00000024942.20	protein_coding	chr19_6050000	274.962	101.756	1.3909	8.5457	3.0748	0.8699	0.9088	-0.0389	skewed:B6	Autosomes	.
Capn10	ENSMUSG00000026270.12	protein_coding	chr1_92850000	472.71	729.492	-0.6206	29.6259	44.4504	0.8672	0.7403	0.1269	biallelic	Autosomes	.
Capn11	ENSMUSG00000058626.17	protein_coding	chr17_45900000	586.216	2.25381	6.3488	17.1138	0.064	0.9909	0.9802	0.0108	mono:B6	Autosomes	.
Capn13	ENSMUSG00000043705.8	protein_coding	chr17_73700000	5.13191	46.1651	-2.3363	0.0462	0.4042	0.2683	0.1915	0.0768	skewed:CAST	Autosomes	.
Capn15	ENSMUSG00000037326.11	protein_coding	chr17_26200000	311.821	303.771	0.0371	9.6637	9.153	0.9152	0.9329	-0.0176	biallelic	Autosomes	.
Capn2	ENSMUSG00000026509.16	protein_coding	chr1_182250000	3296.11	4011.2	-0.2829	55.6565	65.8518	0.8555	0.7666	0.0889	biallelic	Autosomes	.
Capn5	ENSMUSG00000035547.15	protein_coding	chr7_97750000	641.345	808.913	-0.3326	9.6137	11.7891	0.9989	0.8298	0.1692	biallelic	Autosomes	.
Capn6	ENSMUSG00000067276.6	protein_coding	chrX_142550000	1184.62	0	7.8944	39.9915	0	0.3712	0.4939	-0.1227	mono:B6	X	.
Capn9	ENSMUSG00000031981.8	protein_coding	chr8_125300000	1.41427	12.5255	-1.4501	0.0282	0.2429	0.8385	0.9563	-0.1178	skewed:CAST	Autosomes	.
Capns1	ENSMUSG00000001794.14	protein_coding	chr7_29850000	9069.54	7639.03	0.2475	649.303	531.716	0.95	0.7877	0.1623	biallelic	Autosomes	.
Caprin1	ENSMUSG00000027184.15	protein_coding	chr2_103550000	3777.06	3258.89	0.2126	92.5168	77.6095	0.9879	0.9279	0.06	biallelic	Autosomes	.
Caprin2	ENSMUSG00000030309.17	protein_coding	chr6_148700000	369.587	349.605	0.0791	5.8462	5.3767	0.516	0.6275	-0.1115	biallelic	Autosomes	.
Caps2	ENSMUSG00000035694.16	protein_coding	chr10_112000000	74.0478	118.583	-0.6447	1.1893	1.8517	0.0424	0.4468	-0.4044	biallelic	Autosomes	.
Capza1	ENSMUSG00000070372.12	protein_coding	chr3_104750000	1400.32	982.133	0.5096	28.5311	19.4553	0.958	0.7357	0.2224	biallelic	Autosomes	.
Capza2	ENSMUSG00000015733.14	protein_coding	chr6_17650000	2024.49	2166.78	-0.0978	55.9933	58.266	0.6393	0.7072	-0.0679	biallelic	Autosomes	.
Capzb	ENSMUSG00000028745.19	protein_coding	chr4_139000000	257.252	340.982	-0.3997	2.2109	2.8492	0.9691	0.971	-0.0018	biallelic	Autosomes	.
Car1	ENSMUSG00000027556.16	protein_coding	chr3_14850000	21.9143	1.21061	2.1156	0.442	0.0237	0.1058	0.2955	-0.1897	mono:B6	Autosomes	.
Car10	ENSMUSG00000056158.15	protein_coding	chr11_93400000	1.192	10.6294	-1.3358	0.002	0.0174	0.5229	0.3152	0.2076	skewed:CAST	Autosomes	.
Car11	ENSMUSG00000003273.15	protein_coding	chr7_45350000	273.836	631.818	-1.1915	48.1096	107.922	0.9884	0.9118	0.0766	biallelic	Autosomes	.
Car12	ENSMUSG00000032373.16	protein_coding	chr9_66650000	4.59294	112.458	-3.614	0.0735	1.7486	0.9974	0.9168	0.0806	mono:CAST	Autosomes	.
Car2	ENSMUSG00000027562.13	protein_coding	chr3_14950000	693.281	680.107	0.0275	40.6563	38.777	0.5918	0.4689	0.1229	biallelic	Autosomes	.
Car3	ENSMUSG00000027559.6	protein_coding	chr3_14900000	69.1047	67.6442	0.0287	6.5197	6.2049	0.3834	0.3676	0.0158	biallelic	Autosomes	.
Car5a	ENSMUSG00000025317.8	protein_coding	chr8_122650000	5.0847	56.8316	-2.6162	0.1502	1.6323	0.994	0.963	0.031	mono:CAST	Autosomes	.
Car5b	ENSMUSG00000031373.5	protein_coding	chrX_162750000	846.859	55.2774	3.8209	14.0686	0.8928	0.6754	0.6887	-0.0133	mono:B6	X	.
Car6	ENSMUSG00000028972.12	protein_coding	chr4_150250000	0	36.7306	-3.0611	0	2.1206	0.8274	0.9623	-0.1349	mono:CAST	Autosomes	.
Car7	ENSMUSG00000031883.14	protein_coding	chr8_105250000	16.0488	18.0305	-0.1298	0.8716	0.952	0.6542	0.5523	0.1019	biallelic	Autosomes	.
Car8	ENSMUSG00000041261.10	protein_coding	chr4_8100000	13.2674	130.788	-2.894	0.1179	1.1299	0.3266	0.8454	-0.5188	mono:CAST	Autosomes	.
Card10	ENSMUSG00000033170.15	protein_coding	chr15_78650000	66.7817	76.1872	-0.1776	2.0346	2.2568	0.9941	0.8953	0.0988	biallelic	Autosomes	.
Card11	ENSMUSG00000036526.9	protein_coding	chr5_140900000	13.7592	8.20816	0.5062	0.0917	0.0532	0.9333	0.8134	0.1199	biallelic	Autosomes	.
Card19	ENSMUSG00000037960.12	protein_coding	chr13_49350000	257.316	231.099	0.1519	16.7156	14.596	0.9175	0.9423	-0.0249	biallelic	Autosomes	.
Card6	ENSMUSG00000041849.8	protein_coding	chr15_5100000	45.3374	41.1765	0.1245	3.0692	2.7102	0.5877	0.5394	0.0483	biallelic	Autosomes	.
Carf	ENSMUSG00000026017.14	protein_coding	chr1_60150000	311.313	483.189	-0.6261	4.7511	7.1695	0.7701	0.9551	-0.1851	biallelic	Autosomes	.
Carhsp1	ENSMUSG00000008393.10	protein_coding	chr16_8450000	7497.64	4880.44	0.6189	469.549	297.163	0.7613	0.6942	0.0671	biallelic	Autosomes	.
Carm1	ENSMUSG00000032185.17	protein_coding	chr9_21500000	475.088	432.333	0.1346	8.8324	7.8145	0.8892	0.9696	-0.0804	biallelic	Autosomes	.
Carmil1	ENSMUSG00000021338.18	protein_coding	chr13_24300000	983.996	1050.62	-0.0941	3.1162	3.2349	0.8168	0.6223	0.1945	biallelic	Autosomes	.
Carmil2	ENSMUSG00000050357.10	protein_coding	chr8_106400000	17.6519	9.22845	0.6709	1.2597	0.6403	0.9381	0.9811	-0.043	biallelic	Autosomes	.
Carmil3	ENSMUSG00000022211.10	protein_coding	chr14_55700000	191.22	262.583	-0.4475	9.2257	12.3172	0.9455	0.7712	0.1743	biallelic	Autosomes	.
Carnmt1	ENSMUSG00000024726.11	protein_coding	chr19_18650000	253.141	415.36	-0.7035	5.9065	9.4226	0.7541	0.5738	0.1803	biallelic	Autosomes	.
Carns1	ENSMUSG00000075289.6	protein_coding	chr19_4200000	39.5662	33.8371	0.1985	3.0154	2.5073	0.8972	0.9473	-0.0501	biallelic	Autosomes	.
Cars1	ENSMUSG00000010755.18	protein_coding	chr7_143100000	634.123	586.889	0.1108	12.5782	11.3182	0.8415	0.9359	-0.0944	biallelic	Autosomes	.
Cars2	ENSMUSG00000056228.11	protein_coding	chr8_11600000	711.344	855.247	-0.2641	16.4308	19.2065	0.9722	0.8986	0.0736	biallelic	Autosomes	.
Casc3	ENSMUSG00000078676.10	protein_coding	chr11_98650000	692.473	700.497	-0.0165	20.3641	20.0285	0.9603	0.8236	0.1367	biallelic	Autosomes	.
Casd1	ENSMUSG00000015189.13	protein_coding	chr6_4600000	763.831	783.679	-0.0368	15.2736	15.2357	0.5849	0.5705	0.0144	biallelic	Autosomes	.
Cask	ENSMUSG00000031012.18	protein_coding	chrX_13400000	2470.7	6.07595	7.8043	6.2834	0.015	0.9638	0.5607	0.4031	mono:B6	X	.
Caskin1	ENSMUSG00000033597.10	protein_coding	chr17_24700000	465.294	322.277	0.5231	19.7095	13.2726	0.936	0.9143	0.0217	biallelic	Autosomes	.
Caskin2	ENSMUSG00000034471.13	protein_coding	chr11_115700000	887.606	784.45	0.1772	52.1997	44.8531	0.9288	0.9717	-0.0428	biallelic	Autosomes	.
Casp12	ENSMUSG00000025887.11	protein_coding	chr9_5300000	17.1798	308.375	-3.8206	0.5291	9.2345	0.2641	0.4035	-0.1393	mono:CAST	Autosomes	.
Casp2	ENSMUSG00000029863.14	protein_coding	chr6_42200000	1186.44	1147.83	0.0475	57.5617	54.1433	0.7992	0.5583	0.2409	biallelic	Autosomes	.
Casp3	ENSMUSG00000031628.10	protein_coding	chr8_47050000	3424.83	3444.86	-0.0084	129.995	127.127	0.7799	0.8631	-0.0832	biallelic	Autosomes	.
Casp6	ENSMUSG00000027997.10	protein_coding	chr3_129700000	1484.41	1412.83	0.0711	99.5406	92.1117	0.4871	0.5321	-0.045	biallelic	Autosomes	.
Casp7	ENSMUSG00000025076.13	protein_coding	chr19_56400000	951.977	403.002	1.2299	17.8995	7.3672	0.8723	0.986	-0.1137	skewed:B6	Autosomes	.
Casp8ap2	ENSMUSG00000028282.13	protein_coding	chr4_32600000	372.103	361.336	0.0418	8.3658	7.8983	0.9464	0.7075	0.239	biallelic	Autosomes	.
Casp9	ENSMUSG00000028914.14	protein_coding	chr4_141500000	1473.18	1340.76	0.1354	56.0017	49.5537	0.8079	0.8906	-0.0827	biallelic	Autosomes	.
Casq1	ENSMUSG00000007122.12	protein_coding	chr1_172000000	42.7115	41.9236	0.024	3.6406	3.4743	0.9442	0.7342	0.21	biallelic	Autosomes	.
Casq2	ENSMUSG00000027861.14	protein_coding	chr3_102000000	11.2336	29.8475	-1.1021	0.1589	0.4105	0.8219	0.8479	-0.026	skewed:CAST	Autosomes	.
Cast	ENSMUSG00000021585.11	protein_coding	chr13_74950000	741.827	699.865	0.0834	5.4161	4.968	0.1974	0.473	-0.2756	biallelic	Autosomes	.
Castor1	ENSMUSG00000020424.4	protein_coding	chr11_4150000	29.9968	13.1422	0.9479	6.0951	2.5963	0.9843	0.953	0.0313	skewed:B6	Autosomes	.
Castor2	ENSMUSG00000015944.10	protein_coding	chr5_134100000	1431.74	1272.65	0.1693	27.2718	23.5688	0.7019	0.7509	-0.049	biallelic	Autosomes	.
Casz1	ENSMUSG00000028977.18	protein_coding	chr4_149000000	14.7761	11.6955	0.2443	0.0835	0.0642	0.8257	0.8857	-0.06	biallelic	Autosomes	.
Cat	ENSMUSG00000027187.11	protein_coding	chr2_103250000	5086.43	4469.59	0.1863	138.106	117.99	0.8973	0.8286	0.0687	biallelic	Autosomes	.
Catip	ENSMUSG00000073650.10	protein_coding	chr1_74400000	44.6451	27.3047	0.6199	5.262	3.1289	0.9539	0.9503	0.0036	biallelic	Autosomes	.
Catsper2	ENSMUSG00000033486.15	protein_coding	chr2_121200000	161.243	135.495	0.2428	6.478	5.2925	0.9855	0.9993	-0.0138	biallelic	Autosomes	.
Catsper3	ENSMUSG00000021499.13	protein_coding	chr13_55900000	15.0318	11.8171	0.2524	0.5231	0.3998	0.665	0.5645	0.1005	biallelic	Autosomes	.
Catsperd	ENSMUSG00000040828.11	protein_coding	chr17_56900000	18.3521	13.2638	0.3546	0.4297	0.3019	0.7678	0.9147	-0.1469	biallelic	Autosomes	.
Catspere2	ENSMUSG00000091476.9	protein_coding	chr1_177900000	179.634	438.447	-1.2641	0.8068	1.9146	0.3329	0.4948	-0.1619	skewed:CAST	Autosomes	.
Catsperg1	ENSMUSG00000049676.15	protein_coding	chr7_28900000	7.34085	13.7361	-0.6024	0.1908	0.3471	0.7962	0.9141	-0.1179	biallelic	Autosomes	.
Cav1	ENSMUSG00000007655.17	protein_coding	chr6_17300000	333.573	327.051	0.0281	8.0755	7.6979	0.7547	0.6162	0.1386	biallelic	Autosomes	.
Cav2	ENSMUSG00000000058.7	protein_coding	chr6_17250000	266.568	23.0016	3.2777	28.5779	2.3975	0.6851	0.7162	-0.0311	mono:B6	Autosomes	.
Cavin1	ENSMUSG00000004044.10	protein_coding	chr11_100850000	1737.14	2354.4	-0.4376	104.34	137.491	0.8355	0.9677	-0.1321	biallelic	Autosomes	.
Cavin2	ENSMUSG00000045954.8	protein_coding	chr1_51300000	24.0288	24.3038	-0.0136	1.4767	1.4521	0.8211	0.5353	0.2858	biallelic	Autosomes	.
Cavin4	ENSMUSG00000028348.8	protein_coding	chr4_48650000	9.64422	6.71561	0.3219	0.8209	0.5558	0.6151	0.8167	-0.2017	biallelic	Autosomes	.
Cbarp	ENSMUSG00000035640.20	protein_coding	chr10_79950000	399.268	435.378	-0.1234	32.6886	34.6559	0.9863	0.9918	-0.0055	biallelic	Autosomes	.
Cbfa2t2	ENSMUSG00000038533.16	protein_coding	chr2_154250000	707.095	813.87	-0.2016	5.8434	6.5391	0.9875	0.887	0.1006	biallelic	Autosomes	.
Cbfb	ENSMUSG00000031885.15	protein_coding	chr8_105850000	1770.83	1404.42	0.3334	31.8181	24.5342	0.6876	0.7952	-0.1076	biallelic	Autosomes	.
Cbl	ENSMUSG00000034342.10	protein_coding	chr9_44100000	3045.29	3331.16	-0.1292	28.4272	30.2329	0.8481	0.9837	-0.1356	biallelic	Autosomes	.
Cblb	ENSMUSG00000022637.12	protein_coding	chr16_51900000	845.222	848.668	-0.0058	4.0638	3.9671	0.4978	0.8627	-0.3649	biallelic	Autosomes	.
Cbll1	ENSMUSG00000020659.18	protein_coding	chr12_31500000	869.944	909.03	-0.0631	50.0158	50.8128	0.6654	0.4967	0.1687	biallelic	Autosomes	.
Cbln1	ENSMUSG00000031654.17	protein_coding	chr8_88150000	20.3388	14.4744	0.3798	4.113	2.8459	0.4051	0.4742	-0.0691	biallelic	Autosomes	.
Cbln2	ENSMUSG00000024647.15	protein_coding	chr18_86700000	0.397333	18.5785	-2.1272	0.0471	2.1408	0.1243	0.3035	-0.1791	mono:CAST	Autosomes	.
Cbln3	ENSMUSG00000040380.16	protein_coding	chr14_56100000	126.321	106.992	0.2297	19.6006	16.1408	0.9238	0.7429	0.1809	biallelic	Autosomes	.
Cbr1	ENSMUSG00000051483.10	protein_coding	chr16_93400000	84.5811	148.991	-0.7816	15.4572	26.4725	0.7684	0.9077	-0.1393	biallelic	Autosomes	.
Cbr3	ENSMUSG00000022947.9	protein_coding	chr16_93450000	355.386	186.739	0.9104	38.8594	19.8522	0.7783	0.8129	-0.0346	biallelic	Autosomes	.
Cbr4	ENSMUSG00000031641.15	protein_coding	chr8_61900000	689.08	743.26	-0.1084	30.8978	32.4024	0.7478	0.5488	0.1989	biallelic	Autosomes	.
Cbs	ENSMUSG00000024039.16	protein_coding	chr17_31800000	3556.58	4570.32	-0.3614	106.676	133.279	0.8452	0.978	-0.1328	biallelic	Autosomes	.
Cbx1	ENSMUSG00000018666.14	protein_coding	chr11_96650000	994.394	1038.6	-0.0624	43.3242	43.9945	0.9523	0.857	0.0953	biallelic	Autosomes	.
Cbx2	ENSMUSG00000025577.8	protein_coding	chr11_118900000	598.704	522.478	0.1947	61.2649	51.9813	0.8977	0.8488	0.0489	biallelic	Autosomes	.
Cbx3	ENSMUSG00000029836.16	protein_coding	chr6_51400000	1040.9	2865.28	-1.4564	66.3162	177.483	0.921	0.9372	-0.0162	skewed:CAST	Autosomes	.
Cbx4	ENSMUSG00000039989.8	protein_coding	chr11_118950000	587.821	574.307	0.0333	57.7864	54.8913	0.9963	0.8785	0.1177	biallelic	Autosomes	.
Cbx5	ENSMUSG00000009575.15	protein_coding	chr15_103100000	7747.39	6015.75	0.3647	136.445	103.008	0.7861	0.9213	-0.1352	biallelic	Autosomes	.
Cbx7	ENSMUSG00000053411.17	protein_coding	chr15_79850000	138.251	178.918	-0.3605	2.1249	2.6737	0.9997	0.9525	0.0473	biallelic	Autosomes	.
Cbx8	ENSMUSG00000025578.10	protein_coding	chr11_118900000	329.111	290.586	0.1767	59.9901	51.4981	0.8977	0.8488	0.0489	biallelic	Autosomes	.
Cby1	ENSMUSG00000022428.9	protein_coding	chr15_79550000	2074.74	2056.96	0.0124	208.468	200.946	0.9707	0.9533	0.0174	biallelic	Autosomes	.
Cc2d1a	ENSMUSG00000036686.17	protein_coding	chr8_84850000	362.363	339.569	0.0924	20.3908	18.5779	0.9559	0.9051	0.0507	biallelic	Autosomes	.
Cc2d1b	ENSMUSG00000028582.15	protein_coding	chr4_108450000	1095.54	1053.03	0.0568	65.6681	61.3691	0.8479	0.923	-0.0751	biallelic	Autosomes	.
Cc2d2a	ENSMUSG00000039765.16	protein_coding	chr5_43850000	1510.13	1535.48	-0.0239	16.3284	16.1418	0.8429	0.627	0.2159	biallelic	Autosomes	.
Ccar1	ENSMUSG00000020074.8	protein_coding	chr10_62600000	3019.61	3139.87	-0.0563	53.0858	53.6684	0.862	0.7796	0.0824	biallelic	Autosomes	.
Ccar2	ENSMUSG00000033712.7	protein_coding	chr14_70350000	1648.25	1688.31	-0.0345	89.5545	89.1858	0.9839	0.9052	0.0787	biallelic	Autosomes	.
[truncated: 13,046 more rows]
