# Supplementary material
Source: Research Square preprint supplement (doi:10.21203/rs.3.rs-9927928/v1)
Supplement: Supplementary file 6 [file daf2973c227f1b5a57c09600.xlsx]

## Sheet: DNA FISH probes
Supplementary Table 4. DNA and RNA FISH probes and corresponding oligos used in this study.
DNA FISH probes targeting chrX
Probe name	Oligo sequence (5'->3')	F adapter sequence (5'->3')	T sequence (5'->3')	T sequence genomic coordinates (GRCm38 - mm10)	R adapter sequence (5'->3')
chrX_C4	CGATTACCCGATAGGACGAATAGCTTAGAGAGTAGTGTCCCCACTTTTAGTACAACAAAACGGTACATCCATATTCTCGG	CGATTACCCGATAGGACGAA	TAGCTTAGAGAGTAGTGTCCCCACTTTTAGTACAACAAAA	chrX:5496229-5496269	CGGTACATCCATATTCTCGG
chrX_C4	CGATTACCCGATAGGACGAAAGATACAGAAAATGACATGAATAGAAGAGTTGCCCATACCCGGTACATCCATATTCTCGG	CGATTACCCGATAGGACGAA	AGATACAGAAAATGACATGAATAGAAGAGTTGCCCATACC	chrX:5496277-5496317	CGGTACATCCATATTCTCGG
chrX_C4	CGATTACCCGATAGGACGAACCTTCTTTGAAGTCTAAGCACCACACTTTGGAGAGTCACCCGGTACATCCATATTCTCGG	CGATTACCCGATAGGACGAA	CCTTCTTTGAAGTCTAAGCACCACACTTTGGAGAGTCACC	chrX:5496319-5496359	CGGTACATCCATATTCTCGG
chrX_C4	CGATTACCCGATAGGACGAAGAGAATTAAATCACCTATTGCCTTTGAATTCCAGTACTAGCGGTACATCCATATTCTCGG	CGATTACCCGATAGGACGAA	GAGAATTAAATCACCTATTGCCTTTGAATTCCAGTACTAG	chrX:5496379-5496419	CGGTACATCCATATTCTCGG
chrX_C4	CGATTACCCGATAGGACGAACCACCATGGTGAAAGTTAGTTTGGCATTGAACCCCACTACCGGTACATCCATATTCTCGG	CGATTACCCGATAGGACGAA	CCACCATGGTGAAAGTTAGTTTGGCATTGAACCCCACTAC	chrX:5496421-5496461	CGGTACATCCATATTCTCGG
chrX_C4	CGATTACCCGATAGGACGAATAACCAAAAGGCCACTAGCTGTAGACTGACACATGGGAAACGGTACATCCATATTCTCGG	CGATTACCCGATAGGACGAA	TAACCAAAAGGCCACTAGCTGTAGACTGACACATGGGAAA	chrX:5496463-5496503	CGGTACATCCATATTCTCGG
chrX_C4	CGATTACCCGATAGGACGAATATTATCTGGGTGACAAAGAAACTGCCCATGTTACTCATTCGGTACATCCATATTCTCGG	CGATTACCCGATAGGACGAA	TATTATCTGGGTGACAAAGAAACTGCCCATGTTACTCATT	chrX:5496505-5496545	CGGTACATCCATATTCTCGG
chrX_C4	CGATTACCCGATAGGACGAAAAAATTAGCATCAGACTTCACATCAGAGGTCAGTGTCAGACGGTACATCCATATTCTCGG	CGATTACCCGATAGGACGAA	AAAATTAGCATCAGACTTCACATCAGAGGTCAGTGTCAGA	chrX:5496569-5496609	CGGTACATCCATATTCTCGG
chrX_C4	CGATTACCCGATAGGACGAACAATATGATAACAACCACCAATGAGCAGAGAAACAGAGGACGGTACATCCATATTCTCGG	CGATTACCCGATAGGACGAA	CAATATGATAACAACCACCAATGAGCAGAGAAACAGAGGA	chrX:5496611-5496651	CGGTACATCCATATTCTCGG
chrX_C4	CGATTACCCGATAGGACGAATTTTAGATCTACTTGACATCAGGCAGATTCCTGGACACTACGGTACATCCATATTCTCGG	CGATTACCCGATAGGACGAA	TTTTAGATCTACTTGACATCAGGCAGATTCCTGGACACTA	chrX:5496684-5496724	CGGTACATCCATATTCTCGG
chrX_C4	CGATTACCCGATAGGACGAATTCAAAATACTTCACATCAGTTTTGAAGAGAACTTTGGGCCGGTACATCCATATTCTCGG	CGATTACCCGATAGGACGAA	TTCAAAATACTTCACATCAGTTTTGAAGAGAACTTTGGGC	chrX:5496741-5496781	CGGTACATCCATATTCTCGG
chrX_C4	CGATTACCCGATAGGACGAATTTTCCTACCTGGTGCTATAAGCTGCTTCAACTCTGAAACCGGTACATCCATATTCTCGG	CGATTACCCGATAGGACGAA	TTTTCCTACCTGGTGCTATAAGCTGCTTCAACTCTGAAAC	chrX:5496783-5496823	CGGTACATCCATATTCTCGG
chrX_C4	CGATTACCCGATAGGACGAAGGGTATGACTCAGTTTCCCATTAGTGTTGTTGACAAGTCTCGGTACATCCATATTCTCGG	CGATTACCCGATAGGACGAA	GGGTATGACTCAGTTTCCCATTAGTGTTGTTGACAAGTCT	chrX:5496825-5496865	CGGTACATCCATATTCTCGG
chrX_C4	CGATTACCCGATAGGACGAACTGCTATGGTTAGTATTGTCAGAATCTAGACTCACCTGTACGGTACATCCATATTCTCGG	CGATTACCCGATAGGACGAA	CTGCTATGGTTAGTATTGTCAGAATCTAGACTCACCTGTA	chrX:5496867-5496907	CGGTACATCCATATTCTCGG
chrX_C4	CGATTACCCGATAGGACGAACTGGTCATACCTGTATGAGATTATTTTGATGACATGAGCTCGGTACATCCATATTCTCGG	CGATTACCCGATAGGACGAA	CTGGTCATACCTGTATGAGATTATTTTGATGACATGAGCT	chrX:5496917-5496957	CGGTACATCCATATTCTCGG
chrX_C4	CGATTACCCGATAGGACGAATCTGGTCATAGAATCATCGAGCATATAAAATAGAGAAAGCCGGTACATCCATATTCTCGG	CGATTACCCGATAGGACGAA	TCTGGTCATAGAATCATCGAGCATATAAAATAGAGAAAGC	chrX:5496997-5497037	CGGTACATCCATATTCTCGG
chrX_C4	CGATTACCCGATAGGACGAATTCAAGTCCCTGCTGCTTTGACTTCTGTCATGATGGACATCGGTACATCCATATTCTCGG	CGATTACCCGATAGGACGAA	TTCAAGTCCCTGCTGCTTTGACTTCTGTCATGATGGACAT	chrX:5497104-5497144	CGGTACATCCATATTCTCGG
chrX_C4	CGATTACCCGATAGGACGAAAAAACAGGAAAGAAACCAAGGCAGAAATTGTTAACAGGAGCGGTACATCCATATTCTCGG	CGATTACCCGATAGGACGAA	AAAACAGGAAAGAAACCAAGGCAGAAATTGTTAACAGGAG	chrX:5497215-5497255	CGGTACATCCATATTCTCGG
chrX_C4	CGATTACCCGATAGGACGAACTTTGGAAGTGGTTTTGGGGAGGAATGTGGAAGACTTGGGCGGTACATCCATATTCTCGG	CGATTACCCGATAGGACGAA	CTTTGGAAGTGGTTTTGGGGAGGAATGTGGAAGACTTGGG	chrX:5497298-5497338	CGGTACATCCATATTCTCGG
chrX_C4	CGATTACCCGATAGGACGAACTTTGATTAGAAAAGCTTTGGAATTCTGTCATTACAGCTCCGGTACATCCATATTCTCGG	CGATTACCCGATAGGACGAA	CTTTGATTAGAAAAGCTTTGGAATTCTGTCATTACAGCTC	chrX:5497340-5497380	CGGTACATCCATATTCTCGG
chrX_C4	CGATTACCCGATAGGACGAAAGACTATTCTGTTGAGAGACTGGAAGACAATAATACCAACCGGTACATCCATATTCTCGG	CGATTACCCGATAGGACGAA	AGACTATTCTGTTGAGAGACTGGAAGACAATAATACCAAC	chrX:5497383-5497423	CGGTACATCCATATTCTCGG
chrX_C4	CGATTACCCGATAGGACGAAAATGTACATGTTGGGAGACTAGTTTATGTAGTTTTACAGGCGGTACATCCATATTCTCGG	CGATTACCCGATAGGACGAA	AATGTACATGTTGGGAGACTAGTTTATGTAGTTTTACAGG	chrX:5497426-5497466	CGGTACATCCATATTCTCGG
chrX_C4	CGATTACCCGATAGGACGAAACTAAGGACTAAGGATTAAGAAATGGTAGCTAGATACCATCGGTACATCCATATTCTCGG	CGATTACCCGATAGGACGAA	ACTAAGGACTAAGGATTAAGAAATGGTAGCTAGATACCAT	chrX:5497468-5497508	CGGTACATCCATATTCTCGG
chrX_C4	CGATTACCCGATAGGACGAATCTAGCAAATAATCTACCAGTATTCTGATTATGCTCTGAGCGGTACATCCATATTCTCGG	CGATTACCCGATAGGACGAA	TCTAGCAAATAATCTACCAGTATTCTGATTATGCTCTGAG	chrX:5497519-5497559	CGGTACATCCATATTCTCGG
chrX_C4	CGATTACCCGATAGGACGAAGTGACATCAATCTTAAAGTTGATGGACTAAGTTGTTTTGCCGGTACATCCATATTCTCGG	CGATTACCCGATAGGACGAA	GTGACATCAATCTTAAAGTTGATGGACTAAGTTGTTTTGC	chrX:5497566-5497606	CGGTACATCCATATTCTCGG
chrX_C4	CGATTACCCGATAGGACGAAAGGAAATCTCAAGACAGGAGTGCTGCCTTCAAGATGGTGCCGGTACATCCATATTCTCGG	CGATTACCCGATAGGACGAA	AGGAAATCTCAAGACAGGAGTGCTGCCTTCAAGATGGTGC	chrX:5497608-5497648	CGGTACATCCATATTCTCGG
chrX_C4	CGATTACCCGATAGGACGAAAGAAAACATCTCTAACCATTAAAGTAATCAGCGTCACTGACGGTACATCCATATTCTCGG	CGATTACCCGATAGGACGAA	AGAAAACATCTCTAACCATTAAAGTAATCAGCGTCACTGA	chrX:5497650-5497690	CGGTACATCCATATTCTCGG
chrX_C4	CGATTACCCGATAGGACGAAACCTCTTGTGTTACACTATAATAATAGGAAAGGTATCCTGCGGTACATCCATATTCTCGG	CGATTACCCGATAGGACGAA	ACCTCTTGTGTTACACTATAATAATAGGAAAGGTATCCTG	chrX:5497696-5497736	CGGTACATCCATATTCTCGG
chrX_C4	CGATTACCCGATAGGACGAAGGCAAAATCCCACTCCCAGAGATTCTATTTTGTGAAGATTCGGTACATCCATATTCTCGG	CGATTACCCGATAGGACGAA	GGCAAAATCCCACTCCCAGAGATTCTATTTTGTGAAGATT	chrX:5497738-5497778	CGGTACATCCATATTCTCGG
chrX_C4	CGATTACCCGATAGGACGAAAAAGAAAGTATGTTGAAAGGTTTCTCCTGCTCCTTAAAAGCGGTACATCCATATTCTCGG	CGATTACCCGATAGGACGAA	AAAGAAAGTATGTTGAAAGGTTTCTCCTGCTCCTTAAAAG	chrX:5497791-5497831	CGGTACATCCATATTCTCGG
chrX_C4	CGATTACCCGATAGGACGAACCCCATCTCTTCTCTCCTGTAATGTCAGTACATCAGACACCGGTACATCCATATTCTCGG	CGATTACCCGATAGGACGAA	CCCCATCTCTTCTCTCCTGTAATGTCAGTACATCAGACAC	chrX:5497863-5497903	CGGTACATCCATATTCTCGG
chrX_C4	CGATTACCCGATAGGACGAACTGTAGCCCAAGAGAGCAGGCTATATTTCAAGTTTGCAGCCGGTACATCCATATTCTCGG	CGATTACCCGATAGGACGAA	CTGTAGCCCAAGAGAGCAGGCTATATTTCAAGTTTGCAGC	chrX:5497905-5497945	CGGTACATCCATATTCTCGG
chrX_C4	CGATTACCCGATAGGACGAATTAGCCATATTGTCCACATGACACTGGTTTTGTAGGATATCGGTACATCCATATTCTCGG	CGATTACCCGATAGGACGAA	TTAGCCATATTGTCCACATGACACTGGTTTTGTAGGATAT	chrX:5497950-5497990	CGGTACATCCATATTCTCGG
chrX_C4	CGATTACCCGATAGGACGAAAATTGAGTGGTGTCACAGGTTCAAAGGCCAATTGAAACCACGGTACATCCATATTCTCGG	CGATTACCCGATAGGACGAA	AATTGAGTGGTGTCACAGGTTCAAAGGCCAATTGAAACCA	chrX:5497992-5498032	CGGTACATCCATATTCTCGG
chrX_C4	CGATTACCCGATAGGACGAAGAAACAGTGAGGGTAAAATCTGAGCTGTAGTGGAGCTCTCCGGTACATCCATATTCTCGG	CGATTACCCGATAGGACGAA	GAAACAGTGAGGGTAAAATCTGAGCTGTAGTGGAGCTCTC	chrX:5498088-5498128	CGGTACATCCATATTCTCGG
chrX_C4	CGATTACCCGATAGGACGAAAGTATTGGAGATACCAGCACAATCTCTCCTGAGGAAAGCACGGTACATCCATATTCTCGG	CGATTACCCGATAGGACGAA	AGTATTGGAGATACCAGCACAATCTCTCCTGAGGAAAGCA	chrX:5498130-5498170	CGGTACATCCATATTCTCGG
chrX_C4	CGATTACCCGATAGGACGAAATATAGTCTACCCAGAATAGATTGTATGTATGTTGAAGGCCGGTACATCCATATTCTCGG	CGATTACCCGATAGGACGAA	ATATAGTCTACCCAGAATAGATTGTATGTATGTTGAAGGC	chrX:5498181-5498221	CGGTACATCCATATTCTCGG
chrX_C4	CGATTACCCGATAGGACGAACCAAGCTGAGGAGACATGCAGCTATGTAACTCTTTTGCAGCGGTACATCCATATTCTCGG	CGATTACCCGATAGGACGAA	CCAAGCTGAGGAGACATGCAGCTATGTAACTCTTTTGCAG	chrX:5498223-5498263	CGGTACATCCATATTCTCGG
chrX_C4	CGATTACCCGATAGGACGAATTTAATCATGAGTCCTAGATTCAGGACATATAGATACAGGCGGTACATCCATATTCTCGG	CGATTACCCGATAGGACGAA	TTTAATCATGAGTCCTAGATTCAGGACATATAGATACAGG	chrX:5498273-5498313	CGGTACATCCATATTCTCGG
chrX_C4	CGATTACCCGATAGGACGAATTATGCTGGGCTTTGATCTTATTTTGGTCTCATTATTTGCCGGTACATCCATATTCTCGG	CGATTACCCGATAGGACGAA	TTATGCTGGGCTTTGATCTTATTTTGGTCTCATTATTTGC	chrX:5498324-5498364	CGGTACATCCATATTCTCGG
chrX_C4	CGATTACCCGATAGGACGAACATTAGACTTTAAACTGTCTGAAGTATTAGACTATCAGGCCGGTACATCCATATTCTCGG	CGATTACCCGATAGGACGAA	CATTAGACTTTAAACTGTCTGAAGTATTAGACTATCAGGC	chrX:5498472-5498512	CGGTACATCCATATTCTCGG
chrX_C4	CGATTACCCGATAGGACGAATGGGTGGAATGCATTTTACATTATAACATGATCACCAGGTCGGTACATCCATATTCTCGG	CGATTACCCGATAGGACGAA	TGGGTGGAATGCATTTTACATTATAACATGATCACCAGGT	chrX:5498522-5498562	CGGTACATCCATATTCTCGG
chrX_C4	CGATTACCCGATAGGACGAAACCAAGCTGTCAAGGTGTAGAATTGTCAGGATCAGTGTTACGGTACATCCATATTCTCGG	CGATTACCCGATAGGACGAA	ACCAAGCTGTCAAGGTGTAGAATTGTCAGGATCAGTGTTA	chrX:5498612-5498652	CGGTACATCCATATTCTCGG
chrX_C4	CGATTACCCGATAGGACGAAGAATCACCTAGGAGCCAAGGCCCCTGTCCATGGCTTGTCACGGTACATCCATATTCTCGG	CGATTACCCGATAGGACGAA	GAATCACCTAGGAGCCAAGGCCCCTGTCCATGGCTTGTCA	chrX:5498674-5498714	CGGTACATCCATATTCTCGG
chrX_C4	CGATTACCCGATAGGACGAAATTTAATGTGGGAAGACCCATTTTGACTATTTTCCAAGTGCGGTACATCCATATTCTCGG	CGATTACCCGATAGGACGAA	ATTTAATGTGGGAAGACCCATTTTGACTATTTTCCAAGTG	chrX:5498729-5498769	CGGTACATCCATATTCTCGG
chrX_C4	CGATTACCCGATAGGACGAAGTTACCAGTTGCTTCAAGCTCTTGCTATCTGGATGATAAACGGTACATCCATATTCTCGG	CGATTACCCGATAGGACGAA	GTTACCAGTTGCTTCAAGCTCTTGCTATCTGGATGATAAA	chrX:5498840-5498880	CGGTACATCCATATTCTCGG
chrX_C4	CGATTACCCGATAGGACGAAAAGCCTTTCTCTCTTATGTTGCCTTTATCAGAGTGTTTATCGGTACATCCATATTCTCGG	CGATTACCCGATAGGACGAA	AAGCCTTTCTCTCTTATGTTGCCTTTATCAGAGTGTTTAT	chrX:5498907-5498947	CGGTACATCCATATTCTCGG
chrX_C4	CGATTACCCGATAGGACGAAAAAAGGAACTAGGACATTAAGTCTCCATAAACATGGAAAGCGGTACATCCATATTCTCGG	CGATTACCCGATAGGACGAA	AAAAGGAACTAGGACATTAAGTCTCCATAAACATGGAAAG	chrX:5498959-5498999	CGGTACATCCATATTCTCGG
chrX_C4	CGATTACCCGATAGGACGAATTTTGCTCCTCTTTGTGTGATGAATCTTTACAATGGCTCACGGTACATCCATATTCTCGG	CGATTACCCGATAGGACGAA	TTTTGCTCCTCTTTGTGTGATGAATCTTTACAATGGCTCA	chrX:5499008-5499048	CGGTACATCCATATTCTCGG
chrX_C4	CGATTACCCGATAGGACGAATAGACAGAGGCATGTGTACTCTAAGGACAGATGCAGTTTACGGTACATCCATATTCTCGG	CGATTACCCGATAGGACGAA	TAGACAGAGGCATGTGTACTCTAAGGACAGATGCAGTTTA	chrX:5499053-5499093	CGGTACATCCATATTCTCGG
chrX_C4	CGATTACCCGATAGGACGAACCCGAATTGTAAGGAACTACAACATGAGCCTGGATATGCTCGGTACATCCATATTCTCGG	CGATTACCCGATAGGACGAA	CCCGAATTGTAAGGAACTACAACATGAGCCTGGATATGCT	chrX:5499095-5499135	CGGTACATCCATATTCTCGG
chrX_C4	CGATTACCCGATAGGACGAATTTTAGTGGTTGTGAGATAAAGGCATGATCCACATCCAGTCGGTACATCCATATTCTCGG	CGATTACCCGATAGGACGAA	TTTTAGTGGTTGTGAGATAAAGGCATGATCCACATCCAGT	chrX:5499151-5499191	CGGTACATCCATATTCTCGG
chrX_C4	CGATTACCCGATAGGACGAAAGCATAAAACTGGGTAGTCAAGGGTTAGCCATAATAATAGCGGTACATCCATATTCTCGG	CGATTACCCGATAGGACGAA	AGCATAAAACTGGGTAGTCAAGGGTTAGCCATAATAATAG	chrX:5499193-5499233	CGGTACATCCATATTCTCGG
chrX_C4	CGATTACCCGATAGGACGAACTCCAGATTCCATTGGAATAGCAGAAAGCAATGCCACTTTCGGTACATCCATATTCTCGG	CGATTACCCGATAGGACGAA	CTCCAGATTCCATTGGAATAGCAGAAAGCAATGCCACTTT	chrX:5499235-5499275	CGGTACATCCATATTCTCGG
chrX_C4	CGATTACCCGATAGGACGAACAGGAGGGTAGGTCAAGATAATAAGCTCTGGCCAAAGAAACGGTACATCCATATTCTCGG	CGATTACCCGATAGGACGAA	CAGGAGGGTAGGTCAAGATAATAAGCTCTGGCCAAAGAAA	chrX:5499277-5499317	CGGTACATCCATATTCTCGG
chrX_C4	CGATTACCCGATAGGACGAACCAAACAAAGCAAGCAGTCCAGTCTGTCACATTTCTATTCCGGTACATCCATATTCTCGG	CGATTACCCGATAGGACGAA	CCAAACAAAGCAAGCAGTCCAGTCTGTCACATTTCTATTC	chrX:5499335-5499375	CGGTACATCCATATTCTCGG
chrX_C4	CGATTACCCGATAGGACGAACTCAGAACTACCTGTATCTGACCAGCAGAAGTCTGGGTTCCGGTACATCCATATTCTCGG	CGATTACCCGATAGGACGAA	CTCAGAACTACCTGTATCTGACCAGCAGAAGTCTGGGTTC	chrX:5499377-5499417	CGGTACATCCATATTCTCGG
chrX_C4	CGATTACCCGATAGGACGAAAGATATACCCCAGAAGTAAGCATACCATAGCAGTATGAGCCGGTACATCCATATTCTCGG	CGATTACCCGATAGGACGAA	AGATATACCCCAGAAGTAAGCATACCATAGCAGTATGAGC	chrX:5499419-5499459	CGGTACATCCATATTCTCGG
chrX_C4	CGATTACCCGATAGGACGAATAGCTCATCACCAGTGATATGCTGATATTAGTGGGTGATACGGTACATCCATATTCTCGG	CGATTACCCGATAGGACGAA	TAGCTCATCACCAGTGATATGCTGATATTAGTGGGTGATA	chrX:5499461-5499501	CGGTACATCCATATTCTCGG
chrX_C4	CGATTACCCGATAGGACGAACTCATGTGGTGACAAAGTCTGGTGGTATTGATGGTCATAGCGGTACATCCATATTCTCGG	CGATTACCCGATAGGACGAA	CTCATGTGGTGACAAAGTCTGGTGGTATTGATGGTCATAG	chrX:5499503-5499543	CGGTACATCCATATTCTCGG
chrX_C4	CGATTACCCGATAGGACGAAATGGTATAGGAATCTAGGCCTGAACTATGTACTGGGCTACCGGTACATCCATATTCTCGG	CGATTACCCGATAGGACGAA	ATGGTATAGGAATCTAGGCCTGAACTATGTACTGGGCTAC	chrX:5499545-5499585	CGGTACATCCATATTCTCGG
chrX_C4	CGATTACCCGATAGGACGAATGAAAGCTGCTCTGAATCCCACAGTTCCTGCCCAAAGGCTCGGTACATCCATATTCTCGG	CGATTACCCGATAGGACGAA	TGAAAGCTGCTCTGAATCCCACAGTTCCTGCCCAAAGGCT	chrX:5499587-5499627	CGGTACATCCATATTCTCGG
chrX_C4	CGATTACCCGATAGGACGAATAAGTGAAGATGAGATATTTGTGAATAGGCAAACCCCAGACGGTACATCCATATTCTCGG	CGATTACCCGATAGGACGAA	TAAGTGAAGATGAGATATTTGTGAATAGGCAAACCCCAGA	chrX:5499629-5499669	CGGTACATCCATATTCTCGG
chrX_C4	CGATTACCCGATAGGACGAAAGTTTTGTCTTGATGAAGCACCCTTTCTAGGTCACTCCTCCGGTACATCCATATTCTCGG	CGATTACCCGATAGGACGAA	AGTTTTGTCTTGATGAAGCACCCTTTCTAGGTCACTCCTC	chrX:5499671-5499711	CGGTACATCCATATTCTCGG
chrX_C4	CGATTACCCGATAGGACGAAATTCCATTTGTGGATTTAGGATAAAAGCAAGAATTGGAGCCGGTACATCCATATTCTCGG	CGATTACCCGATAGGACGAA	ATTCCATTTGTGGATTTAGGATAAAAGCAAGAATTGGAGC	chrX:5499726-5499766	CGGTACATCCATATTCTCGG
chrX_C4	CGATTACCCGATAGGACGAATCTATAGTGCTGGGAAAATGACAACATGCCAATAGCAAAACGGTACATCCATATTCTCGG	CGATTACCCGATAGGACGAA	TCTATAGTGCTGGGAAAATGACAACATGCCAATAGCAAAA	chrX:5499768-5499808	CGGTACATCCATATTCTCGG
chrX_C4	CGATTACCCGATAGGACGAATCAGAAGGGTTGGAGTTAAGAATTATCTGGCAATGAAATACGGTACATCCATATTCTCGG	CGATTACCCGATAGGACGAA	TCAGAAGGGTTGGAGTTAAGAATTATCTGGCAATGAAATA	chrX:5499810-5499850	CGGTACATCCATATTCTCGG
chrX_C4	CGATTACCCGATAGGACGAAAACAAACAAACAAACAAACCAGCTTGCCCAGAATTTCCAGCGGTACATCCATATTCTCGG	CGATTACCCGATAGGACGAA	AACAAACAAACAAACAAACCAGCTTGCCCAGAATTTCCAG	chrX:5499873-5499913	CGGTACATCCATATTCTCGG
chrX_C4	CGATTACCCGATAGGACGAAGGCAAGCACGGAACCGGGGAGCTAGTGGAGACTGGAATTACGGTACATCCATATTCTCGG	CGATTACCCGATAGGACGAA	GGCAAGCACGGAACCGGGGAGCTAGTGGAGACTGGAATTA	chrX:5499915-5499955	CGGTACATCCATATTCTCGG
chrX_C4	CGATTACCCGATAGGACGAAAATGTCAACAAGCATCAAAGGTTTCATGAAAGATAAGGTGCGGTACATCCATATTCTCGG	CGATTACCCGATAGGACGAA	AATGTCAACAAGCATCAAAGGTTTCATGAAAGATAAGGTG	chrX:5499987-5500027	CGGTACATCCATATTCTCGG
chrX_C4	CGATTACCCGATAGGACGAAAGCAGGAGAGTAAGTGTGAGACCAGCCATGACTGTGGGGCCGGTACATCCATATTCTCGG	CGATTACCCGATAGGACGAA	AGCAGGAGAGTAAGTGTGAGACCAGCCATGACTGTGGGGC	chrX:5500054-5500094	CGGTACATCCATATTCTCGG
chrX_C4	CGATTACCCGATAGGACGAAGGCCCCTCCTCAGTCTCTTGCTCTTACTCTTCACTCTCTTCGGTACATCCATATTCTCGG	CGATTACCCGATAGGACGAA	GGCCCCTCCTCAGTCTCTTGCTCTTACTCTTCACTCTCTT	chrX:5500368-5500408	CGGTACATCCATATTCTCGG
chrX_C4	CGATTACCCGATAGGACGAATCTCTTGCTCTTACTGCTCTTACTTCCCTTACTCTCCTCTCGGTACATCCATATTCTCGG	CGATTACCCGATAGGACGAA	TCTCTTGCTCTTACTGCTCTTACTTCCCTTACTCTCCTCT	chrX:5500410-5500450	CGGTACATCCATATTCTCGG
chrX_C4	CGATTACCCGATAGGACGAAGGTCTATCCTCCCTTCCCCTTCTTTCCCCTAGCCCCTTTTCGGTACATCCATATTCTCGG	CGATTACCCGATAGGACGAA	GGTCTATCCTCCCTTCCCCTTCTTTCCCCTAGCCCCTTTT	chrX:5500926-5500966	CGGTACATCCATATTCTCGG
chrX_C4	CGATTACCCGATAGGACGAAAACCCCTATATCAAAATACAAACTAGCAAAGGCATTTCAGCGGTACATCCATATTCTCGG	CGATTACCCGATAGGACGAA	AACCCCTATATCAAAATACAAACTAGCAAAGGCATTTCAG	chrX:5500996-5501036	CGGTACATCCATATTCTCGG
chrX_C4	CGATTACCCGATAGGACGAATTTAGACCCTGGGAAAAGGGGCTGAAGTGTATCTATATTGCGGTACATCCATATTCTCGG	CGATTACCCGATAGGACGAA	TTTAGACCCTGGGAAAAGGGGCTGAAGTGTATCTATATTG	chrX:5501054-5501094	CGGTACATCCATATTCTCGG
chrX_C4	CGATTACCCGATAGGACGAACCCGAATTTTCCACCCTGGGGCTGAGCTGCCTTTCCGTATCGGTACATCCATATTCTCGG	CGATTACCCGATAGGACGAA	CCCGAATTTTCCACCCTGGGGCTGAGCTGCCTTTCCGTAT	chrX:5501170-5501210	CGGTACATCCATATTCTCGG
chrX_C4	CGATTACCCGATAGGACGAAAATCCAGACATGTTGTCATGTTGGACTTTCTTTCTCCCTCCGGTACATCCATATTCTCGG	CGATTACCCGATAGGACGAA	AATCCAGACATGTTGTCATGTTGGACTTTCTTTCTCCCTC	chrX:5501212-5501252	CGGTACATCCATATTCTCGG
chrX_C4	CGATTACCCGATAGGACGAACCTCTCCCTCCTTCTTTCTCTCTGTGTGTATATTCTTTCTCGGTACATCCATATTCTCGG	CGATTACCCGATAGGACGAA	CCTCTCCCTCCTTCTTTCTCTCTGTGTGTATATTCTTTCT	chrX:5501254-5501294	CGGTACATCCATATTCTCGG
chrX_C4	CGATTACCCGATAGGACGAATTTCTTTCTTCTGCCTATCTCTCCCCTTGGAGACTCCCTTCGGTACATCCATATTCTCGG	CGATTACCCGATAGGACGAA	TTTCTTTCTTCTGCCTATCTCTCCCCTTGGAGACTCCCTT	chrX:5501411-5501451	CGGTACATCCATATTCTCGG
chrX_C4	CGATTACCCGATAGGACGAAATCAATGACCACATCTTAAATGCAAAATACTGTGCTAGACCGGTACATCCATATTCTCGG	CGATTACCCGATAGGACGAA	ATCAATGACCACATCTTAAATGCAAAATACTGTGCTAGAC	chrX:5501565-5501605	CGGTACATCCATATTCTCGG
chrX_C4	CGATTACCCGATAGGACGAAATGTGAAGAAAGAAACTCAGATACAATGTTTATCCGAGAGCGGTACATCCATATTCTCGG	CGATTACCCGATAGGACGAA	ATGTGAAGAAAGAAACTCAGATACAATGTTTATCCGAGAG	chrX:5501781-5501821	CGGTACATCCATATTCTCGG
chrX_C4	CGATTACCCGATAGGACGAAGTCTCATCCCTTAGACCCACATGGTAAGTAAATGTAGAACCGGTACATCCATATTCTCGG	CGATTACCCGATAGGACGAA	GTCTCATCCCTTAGACCCACATGGTAAGTAAATGTAGAAC	chrX:5501863-5501903	CGGTACATCCATATTCTCGG
chrX_C4	CGATTACCCGATAGGACGAATTGTACCTGTCTCCTTTACTTTGGATATCTTGTTTACTTCCGGTACATCCATATTCTCGG	CGATTACCCGATAGGACGAA	TTGTACCTGTCTCCTTTACTTTGGATATCTTGTTTACTTC	chrX:5501928-5501968	CGGTACATCCATATTCTCGG
chrX_C4	CGATTACCCGATAGGACGAATCTTTAAAAGAGTCTTTGTATAACCTGTCTTCCTTCAAGGCGGTACATCCATATTCTCGG	CGATTACCCGATAGGACGAA	TCTTTAAAAGAGTCTTTGTATAACCTGTCTTCCTTCAAGG	chrX:5501986-5502026	CGGTACATCCATATTCTCGG
chrX_C4	CGATTACCCGATAGGACGAAGAAGGTACAGCAATAAGTCCTCCTAAACCAAAATATAGTCCGGTACATCCATATTCTCGG	CGATTACCCGATAGGACGAA	GAAGGTACAGCAATAAGTCCTCCTAAACCAAAATATAGTC	chrX:5502028-5502068	CGGTACATCCATATTCTCGG
chrX_C4	CGATTACCCGATAGGACGAACCCCACTCTAAACCCTCCCCATGAAGACAATTATCCATGACGGTACATCCATATTCTCGG	CGATTACCCGATAGGACGAA	CCCCACTCTAAACCCTCCCCATGAAGACAATTATCCATGA	chrX:5502104-5502144	CGGTACATCCATATTCTCGG
chrX_C4	CGATTACCCGATAGGACGAAGTAAGGCTGTAAATTATCTATGAGGCAAATAACCATTACCCGGTACATCCATATTCTCGG	CGATTACCCGATAGGACGAA	GTAAGGCTGTAAATTATCTATGAGGCAAATAACCATTACC	chrX:5502146-5502186	CGGTACATCCATATTCTCGG
chrX_C4	CGATTACCCGATAGGACGAATGAGCTACTTTGTCCTCCCATGTAGTAAGGACTTCTCTTGCGGTACATCCATATTCTCGG	CGATTACCCGATAGGACGAA	TGAGCTACTTTGTCCTCCCATGTAGTAAGGACTTCTCTTG	chrX:5502188-5502228	CGGTACATCCATATTCTCGG
chrX_C4	CGATTACCCGATAGGACGAAGGAACTAGGCTGAAGCAATGATCAAGGAGAGACCACATTCCGGTACATCCATATTCTCGG	CGATTACCCGATAGGACGAA	GGAACTAGGCTGAAGCAATGATCAAGGAGAGACCACATTC	chrX:5502230-5502270	CGGTACATCCATATTCTCGG
chrX_C4	CGATTACCCGATAGGACGAAACCCAGACTGCATAATTATGCTACCTCTAGTTCTCTTCTACGGTACATCCATATTCTCGG	CGATTACCCGATAGGACGAA	ACCCAGACTGCATAATTATGCTACCTCTAGTTCTCTTCTA	chrX:5502272-5502312	CGGTACATCCATATTCTCGG
chrX_C4	CGATTACCCGATAGGACGAAGTGGCCACACATCTCTCTGCTTTTAGGCAAGTTTTAGCTCCGGTACATCCATATTCTCGG	CGATTACCCGATAGGACGAA	GTGGCCACACATCTCTCTGCTTTTAGGCAAGTTTTAGCTC	chrX:5502314-5502354	CGGTACATCCATATTCTCGG
chrX_C4	CGATTACCCGATAGGACGAAACTGGAATATTACAAACAAATGGCTAAGTCTAGCTTGTTGCGGTACATCCATATTCTCGG	CGATTACCCGATAGGACGAA	ACTGGAATATTACAAACAAATGGCTAAGTCTAGCTTGTTG	chrX:5502394-5502434	CGGTACATCCATATTCTCGG
chrX_C4	CGATTACCCGATAGGACGAAGCTACTAGAGCCCAAGCTTCTATGTTACAAGTCTAGTACTCGGTACATCCATATTCTCGG	CGATTACCCGATAGGACGAA	GCTACTAGAGCCCAAGCTTCTATGTTACAAGTCTAGTACT	chrX:5502436-5502476	CGGTACATCCATATTCTCGG
chrX_C4	CGATTACCCGATAGGACGAAAAAACCCATCCATATTCAGGCCAGAGCTTCTAAATCCTCTCGGTACATCCATATTCTCGG	CGATTACCCGATAGGACGAA	AAAACCCATCCATATTCAGGCCAGAGCTTCTAAATCCTCT	chrX:5502515-5502555	CGGTACATCCATATTCTCGG
chrX_C4	CGATTACCCGATAGGACGAAGGTATTAGTGGACATCTGAGTGCTTGGGAGACACATCTGACGGTACATCCATATTCTCGG	CGATTACCCGATAGGACGAA	GGTATTAGTGGACATCTGAGTGCTTGGGAGACACATCTGA	chrX:5502557-5502597	CGGTACATCCATATTCTCGG
chrX_C4	CGATTACCCGATAGGACGAATAACTTGATCAAGTCATGTGATATCCCTAAACCTCAGGTAGCGGCTCTTATATACTACCG	CGATTACCCGATAGGACGAA	TAACTTGATCAAGTCATGTGATATCCCTAAACCTCAGGTA	chrX:6497720-6497760	GCGGCTCTTATATACTACCG
chrX_C4	CGATTACCCGATAGGACGAAAAGTAAAAGTAGAATTATAGTGAAGAACGAAGAACCAGGCGCGGCTCTTATATACTACCG	CGATTACCCGATAGGACGAA	AAGTAAAAGTAGAATTATAGTGAAGAACGAAGAACCAGGC	chrX:6497771-6497811	GCGGCTCTTATATACTACCG
chrX_C4	CGATTACCCGATAGGACGAAGTAAATTGGACGATATCCTGCAGTCACTTCTATTTTCAATGCGGCTCTTATATACTACCG	CGATTACCCGATAGGACGAA	GTAAATTGGACGATATCCTGCAGTCACTTCTATTTTCAAT	chrX:6497813-6497853	GCGGCTCTTATATACTACCG
chrX_C4	CGATTACCCGATAGGACGAAATTGACTAACTGCAAGTTGCTCTTTACAGACATTTTGTTGGCGGCTCTTATATACTACCG	CGATTACCCGATAGGACGAA	ATTGACTAACTGCAAGTTGCTCTTTACAGACATTTTGTTG	chrX:6497861-6497901	GCGGCTCTTATATACTACCG
chrX_C4	CGATTACCCGATAGGACGAATTAGATGCCAGCAATAGATATGTAAGAAGAGAATGTCTCTGCGGCTCTTATATACTACCG	CGATTACCCGATAGGACGAA	TTAGATGCCAGCAATAGATATGTAAGAAGAGAATGTCTCT	chrX:6497903-6497943	GCGGCTCTTATATACTACCG
chrX_C4	CGATTACCCGATAGGACGAATTTTGGTTGAGCTATTATGATGGAGGTTAGTATGGGGAAAGCGGCTCTTATATACTACCG	CGATTACCCGATAGGACGAA	TTTTGGTTGAGCTATTATGATGGAGGTTAGTATGGGGAAA	chrX:6498017-6498057	GCGGCTCTTATATACTACCG
chrX_C4	CGATTACCCGATAGGACGAAAGAGAAGGTCAAGAAGGCTCTCTAAGAAGTCATGACTTGAGCGGCTCTTATATACTACCG	CGATTACCCGATAGGACGAA	AGAGAAGGTCAAGAAGGCTCTCTAAGAAGTCATGACTTGA	chrX:6498059-6498099	GCGGCTCTTATATACTACCG
chrX_C4	CGATTACCCGATAGGACGAACTTGATAATGGGATTTAGACAAAGAATATTTTCAGCCTGGGCGGCTCTTATATACTACCG	CGATTACCCGATAGGACGAA	CTTGATAATGGGATTTAGACAAAGAATATTTTCAGCCTGG	chrX:6498106-6498146	GCGGCTCTTATATACTACCG
chrX_C4	CGATTACCCGATAGGACGAAAACAGGAAATGCAAAGGTCCTAAGGCTTTCCTTCCTTCCTGCGGCTCTTATATACTACCG	CGATTACCCGATAGGACGAA	AACAGGAAATGCAAAGGTCCTAAGGCTTTCCTTCCTTCCT	chrX:6498148-6498188	GCGGCTCTTATATACTACCG
chrX_C4	CGATTACCCGATAGGACGAAGTGTGTGTGTTCGCGCAGGCATGCTGGATATGGATGAAAGGCGGCTCTTATATACTACCG	CGATTACCCGATAGGACGAA	GTGTGTGTGTTCGCGCAGGCATGCTGGATATGGATGAAAG	chrX:6498241-6498281	GCGGCTCTTATATACTACCG
chrX_C4	CGATTACCCGATAGGACGAATTTCAGTAAACTGCATAGTCAGATCACATTGAACTTCTGAGCGGCTCTTATATACTACCG	CGATTACCCGATAGGACGAA	TTTCAGTAAACTGCATAGTCAGATCACATTGAACTTCTGA	chrX:6498283-6498323	GCGGCTCTTATATACTACCG
chrX_C4	CGATTACCCGATAGGACGAATTCTGCTATTTAAGTTGTAAGAATCATTCCTTAGTCTGCCGCGGCTCTTATATACTACCG	CGATTACCCGATAGGACGAA	TTCTGCTATTTAAGTTGTAAGAATCATTCCTTAGTCTGCC	chrX:6498325-6498365	GCGGCTCTTATATACTACCG
chrX_C4	CGATTACCCGATAGGACGAACCAGATATTAATGGTAAGTTTAAGTTTATACAGGAGACCCGCGGCTCTTATATACTACCG	CGATTACCCGATAGGACGAA	CCAGATATTAATGGTAAGTTTAAGTTTATACAGGAGACCC	chrX:6498389-6498429	GCGGCTCTTATATACTACCG
chrX_C4	CGATTACCCGATAGGACGAAGAGGCAGGACTGGGACAGCAGAAGAGCTAGGAGGATACCAGCGGCTCTTATATACTACCG	CGATTACCCGATAGGACGAA	GAGGCAGGACTGGGACAGCAGAAGAGCTAGGAGGATACCA	chrX:6498431-6498471	GCGGCTCTTATATACTACCG
chrX_C4	CGATTACCCGATAGGACGAAGAGGACTAGGCACACCAGGCAATCTCAAATGCCTTAGCAGGCGGCTCTTATATACTACCG	CGATTACCCGATAGGACGAA	GAGGACTAGGCACACCAGGCAATCTCAAATGCCTTAGCAG	chrX:6498473-6498513	GCGGCTCTTATATACTACCG
chrX_C4	CGATTACCCGATAGGACGAAGAATGAGGAGAAGTGGAGGCCTGTTCAGGAGTGTTTGAATGCGGCTCTTATATACTACCG	CGATTACCCGATAGGACGAA	GAATGAGGAGAAGTGGAGGCCTGTTCAGGAGTGTTTGAAT	chrX:6498515-6498555	GCGGCTCTTATATACTACCG
chrX_C4	CGATTACCCGATAGGACGAATGTTTCTTTAGGTGTGGAACATAAAACAGCACCATAGTGAGCGGCTCTTATATACTACCG	CGATTACCCGATAGGACGAA	TGTTTCTTTAGGTGTGGAACATAAAACAGCACCATAGTGA	chrX:6498557-6498597	GCGGCTCTTATATACTACCG
chrX_C4	CGATTACCCGATAGGACGAATTGCCTGGGAAGAGCACCCTCAGTGCCAAGGGGTGTGGAGGCGGCTCTTATATACTACCG	CGATTACCCGATAGGACGAA	TTGCCTGGGAAGAGCACCCTCAGTGCCAAGGGGTGTGGAG	chrX:6498599-6498639	GCGGCTCTTATATACTACCG
chrX_C4	CGATTACCCGATAGGACGAATGCTGGCAAATGGGCTCCATCATAATTGGGTGAATAACAAGCGGCTCTTATATACTACCG	CGATTACCCGATAGGACGAA	TGCTGGCAAATGGGCTCCATCATAATTGGGTGAATAACAA	chrX:6498641-6498681	GCGGCTCTTATATACTACCG
chrX_C4	CGATTACCCGATAGGACGAAAGGTTCGAGAACTACAAATAATCAGGAATAGGAATACTACGCGGCTCTTATATACTACCG	CGATTACCCGATAGGACGAA	AGGTTCGAGAACTACAAATAATCAGGAATAGGAATACTAC	chrX:6498700-6498740	GCGGCTCTTATATACTACCG
chrX_C4	CGATTACCCGATAGGACGAACTACTACTACTACTACTAATGACTAAAGTACTTGGCTCTTGCGGCTCTTATATACTACCG	CGATTACCCGATAGGACGAA	CTACTACTACTACTACTAATGACTAAAGTACTTGGCTCTT	chrX:6498742-6498782	GCGGCTCTTATATACTACCG
chrX_C4	CGATTACCCGATAGGACGAAAAAAGCAGAAAGAATTGCTTCTGCATTGCTGATTCCCCAGGCGGCTCTTATATACTACCG	CGATTACCCGATAGGACGAA	AAAAGCAGAAAGAATTGCTTCTGCATTGCTGATTCCCCAG	chrX:6498806-6498846	GCGGCTCTTATATACTACCG
chrX_C4	CGATTACCCGATAGGACGAACTGGACATCAAATGCCCATCAGTTTCTCCCCTGCCCCAAAGCGGCTCTTATATACTACCG	CGATTACCCGATAGGACGAA	CTGGACATCAAATGCCCATCAGTTTCTCCCCTGCCCCAAA	chrX:6498848-6498888	GCGGCTCTTATATACTACCG
chrX_C4	CGATTACCCGATAGGACGAATAATCCTGGCCTTACAAAGGGAAAATGATATCTGCTGCAAGCGGCTCTTATATACTACCG	CGATTACCCGATAGGACGAA	TAATCCTGGCCTTACAAAGGGAAAATGATATCTGCTGCAA	chrX:6498890-6498930	GCGGCTCTTATATACTACCG
chrX_C4	CGATTACCCGATAGGACGAAATAATCCATGCCTTGCACATCTCACCGAGCAGGAAGAAGAGCGGCTCTTATATACTACCG	CGATTACCCGATAGGACGAA	ATAATCCATGCCTTGCACATCTCACCGAGCAGGAAGAAGA	chrX:6498932-6498972	GCGGCTCTTATATACTACCG
chrX_C4	CGATTACCCGATAGGACGAAGTGTGTCACTTCACAGTTCCTATGTGAACAGGAAACTCAGGCGGCTCTTATATACTACCG	CGATTACCCGATAGGACGAA	GTGTGTCACTTCACAGTTCCTATGTGAACAGGAAACTCAG	chrX:6498974-6499014	GCGGCTCTTATATACTACCG
chrX_C4	CGATTACCCGATAGGACGAACTAACAGTGTGATGGCTCACTTACTTCTAGATTTGCAGCCGCGGCTCTTATATACTACCG	CGATTACCCGATAGGACGAA	CTAACAGTGTGATGGCTCACTTACTTCTAGATTTGCAGCC	chrX:6499016-6499056	GCGGCTCTTATATACTACCG
chrX_C4	CGATTACCCGATAGGACGAACTGTAAAAGCCACAGCAACTGTGGCAGTTTAATTGAAAGAGCGGCTCTTATATACTACCG	CGATTACCCGATAGGACGAA	CTGTAAAAGCCACAGCAACTGTGGCAGTTTAATTGAAAGA	chrX:6499058-6499098	GCGGCTCTTATATACTACCG
chrX_C4	CGATTACCCGATAGGACGAAGATCTGTCCTGGGGCAAATAAAGAATATTACTGTTACTGCGCGGCTCTTATATACTACCG	CGATTACCCGATAGGACGAA	GATCTGTCCTGGGGCAAATAAAGAATATTACTGTTACTGC	chrX:6499100-6499140	GCGGCTCTTATATACTACCG
chrX_C4	CGATTACCCGATAGGACGAATCACACTGTACACATCTGCCCTGCTTTGTCTTTCTGAGCGGCGGCTCTTATATACTACCG	CGATTACCCGATAGGACGAA	TCACACTGTACACATCTGCCCTGCTTTGTCTTTCTGAGCG	chrX:6499142-6499182	GCGGCTCTTATATACTACCG
chrX_C4	CGATTACCCGATAGGACGAACCTTTTGCTTTGGTAGCCTGGCAGAGGATGCAGGGAAGTTGCGGCTCTTATATACTACCG	CGATTACCCGATAGGACGAA	CCTTTTGCTTTGGTAGCCTGGCAGAGGATGCAGGGAAGTT	chrX:6499184-6499224	GCGGCTCTTATATACTACCG
chrX_C4	CGATTACCCGATAGGACGAAATGATCCCTTTCTTCTTCATTTTCCACTGACCAGAGGGATGCGGCTCTTATATACTACCG	CGATTACCCGATAGGACGAA	ATGATCCCTTTCTTCTTCATTTTCCACTGACCAGAGGGAT	chrX:6499226-6499266	GCGGCTCTTATATACTACCG
chrX_C4	CGATTACCCGATAGGACGAAATGTAGAGCAGAGATTCAAATCACTGCTTCGAAAAGGGATGCGGCTCTTATATACTACCG	CGATTACCCGATAGGACGAA	ATGTAGAGCAGAGATTCAAATCACTGCTTCGAAAAGGGAT	chrX:6499268-6499308	GCGGCTCTTATATACTACCG
chrX_C4	CGATTACCCGATAGGACGAACAGACAGGAGCAATGTTTGGGGCATAGAATATAAATGGCTGCGGCTCTTATATACTACCG	CGATTACCCGATAGGACGAA	CAGACAGGAGCAATGTTTGGGGCATAGAATATAAATGGCT	chrX:6499310-6499350	GCGGCTCTTATATACTACCG
chrX_C4	CGATTACCCGATAGGACGAACTCTGGAAATCAGAAAGCAAGCTCCATTTCATTTATGCCAGCGGCTCTTATATACTACCG	CGATTACCCGATAGGACGAA	CTCTGGAAATCAGAAAGCAAGCTCCATTTCATTTATGCCA	chrX:6499352-6499392	GCGGCTCTTATATACTACCG
chrX_C4	CGATTACCCGATAGGACGAATCTGGTGGAGCACCTCAAGTACCTACTGAAATGATCAAGTGCGGCTCTTATATACTACCG	CGATTACCCGATAGGACGAA	TCTGGTGGAGCACCTCAAGTACCTACTGAAATGATCAAGT	chrX:6499394-6499434	GCGGCTCTTATATACTACCG
chrX_C4	CGATTACCCGATAGGACGAAGTCCCAGTGAGCCCAGCAGGCCAGGGGTTTCCATGGATGGGCGGCTCTTATATACTACCG	CGATTACCCGATAGGACGAA	GTCCCAGTGAGCCCAGCAGGCCAGGGGTTTCCATGGATGG	chrX:6499436-6499476	GCGGCTCTTATATACTACCG
chrX_C4	CGATTACCCGATAGGACGAATTTAGTCTCTCCCCTGGAGTTTATTCAGTGTGGTAATCCCGCGGCTCTTATATACTACCG	CGATTACCCGATAGGACGAA	TTTAGTCTCTCCCCTGGAGTTTATTCAGTGTGGTAATCCC	chrX:6499478-6499518	GCGGCTCTTATATACTACCG
chrX_C4	CGATTACCCGATAGGACGAATTCGGTCAGAAATGACTAATGCTGAATTTGTACACTCTTTGCGGCTCTTATATACTACCG	CGATTACCCGATAGGACGAA	TTCGGTCAGAAATGACTAATGCTGAATTTGTACACTCTTT	chrX:6499520-6499560	GCGGCTCTTATATACTACCG
chrX_C4	CGATTACCCGATAGGACGAATTTGCATGATAGGTTATGAATAATGGCTTCAGAGAACTACGCGGCTCTTATATACTACCG	CGATTACCCGATAGGACGAA	TTTGCATGATAGGTTATGAATAATGGCTTCAGAGAACTAC	chrX:6499585-6499625	GCGGCTCTTATATACTACCG
chrX_C4	CGATTACCCGATAGGACGAACTGAGTTATTCAATGAGCTTGGCTTGTGGATGGTTCAGATGCGGCTCTTATATACTACCG	CGATTACCCGATAGGACGAA	CTGAGTTATTCAATGAGCTTGGCTTGTGGATGGTTCAGAT	chrX:6499627-6499667	GCGGCTCTTATATACTACCG
chrX_C4	CGATTACCCGATAGGACGAATTTCATTCAGCAGGCTATTTTGAAAGTAGGTTTAGATCAGGCGGCTCTTATATACTACCG	CGATTACCCGATAGGACGAA	TTTCATTCAGCAGGCTATTTTGAAAGTAGGTTTAGATCAG	chrX:6499712-6499752	GCGGCTCTTATATACTACCG
chrX_C4	CGATTACCCGATAGGACGAACGATATAGAGGAGCTGAAAATGAGCTTGTATACTGAACTCGCGGCTCTTATATACTACCG	CGATTACCCGATAGGACGAA	CGATATAGAGGAGCTGAAAATGAGCTTGTATACTGAACTC	chrX:6499754-6499794	GCGGCTCTTATATACTACCG
chrX_C4	CGATTACCCGATAGGACGAAGATAACAACTTCTTCCAGAAAATAGGAGGCCAAATTTTAGGCGGCTCTTATATACTACCG	CGATTACCCGATAGGACGAA	GATAACAACTTCTTCCAGAAAATAGGAGGCCAAATTTTAG	chrX:6499798-6499838	GCGGCTCTTATATACTACCG
chrX_C4	CGATTACCCGATAGGACGAATTTAGGTACGCCCTTCCCTTTGGTTCTGTCTATCCCTGTCGCGGCTCTTATATACTACCG	CGATTACCCGATAGGACGAA	TTTAGGTACGCCCTTCCCTTTGGTTCTGTCTATCCCTGTC	chrX:6499840-6499880	GCGGCTCTTATATACTACCG
chrX_C4	CGATTACCCGATAGGACGAACCCTATCCCTTGTCTACCACATCAATTTTGTAGATTCCTTGCGGCTCTTATATACTACCG	CGATTACCCGATAGGACGAA	CCCTATCCCTTGTCTACCACATCAATTTTGTAGATTCCTT	chrX:6499882-6499922	GCGGCTCTTATATACTACCG
chrX_C4	CGATTACCCGATAGGACGAAATTGTTTGTACTACTTTAGTCCCAATCATACCAAGTAGCCGCGGCTCTTATATACTACCG	CGATTACCCGATAGGACGAA	ATTGTTTGTACTACTTTAGTCCCAATCATACCAAGTAGCC	chrX:6499924-6499964	GCGGCTCTTATATACTACCG
chrX_C4	CGATTACCCGATAGGACGAACCTAACTATGATTGTAAAGGCATGTGAATAATTTGCTGGGGCGGCTCTTATATACTACCG	CGATTACCCGATAGGACGAA	CCTAACTATGATTGTAAAGGCATGTGAATAATTTGCTGGG	chrX:6500033-6500073	GCGGCTCTTATATACTACCG
chrX_C4	CGATTACCCGATAGGACGAATTATTGAGACTCGTGTGTTTTACTGTATTTAAATCAGCCCGCGGCTCTTATATACTACCG	CGATTACCCGATAGGACGAA	TTATTGAGACTCGTGTGTTTTACTGTATTTAAATCAGCCC	chrX:6500138-6500178	GCGGCTCTTATATACTACCG
chrX_C4	CGATTACCCGATAGGACGAAAAAATTTCTAGAGTTGACAGCTTGCATTTCTGTAAGGCAAGCGGCTCTTATATACTACCG	CGATTACCCGATAGGACGAA	AAAATTTCTAGAGTTGACAGCTTGCATTTCTGTAAGGCAA	chrX:6500188-6500228	GCGGCTCTTATATACTACCG
chrX_C4	CGATTACCCGATAGGACGAACATTTCTGGTAAATGGTCAGCTTCCATAACAGAGCTTTAAGCGGCTCTTATATACTACCG	CGATTACCCGATAGGACGAA	CATTTCTGGTAAATGGTCAGCTTCCATAACAGAGCTTTAA	chrX:6500230-6500270	GCGGCTCTTATATACTACCG
chrX_C4	CGATTACCCGATAGGACGAATATGAACTGACACATTCCAAGATTCTGTTTTGAGACAGTTGCGGCTCTTATATACTACCG	CGATTACCCGATAGGACGAA	TATGAACTGACACATTCCAAGATTCTGTTTTGAGACAGTT	chrX:6500272-6500312	GCGGCTCTTATATACTACCG
chrX_C4	CGATTACCCGATAGGACGAAAATTAAAACAAGGATCAACGCTTCATTTTCTTTACCTGCCGCGGCTCTTATATACTACCG	CGATTACCCGATAGGACGAA	AATTAAAACAAGGATCAACGCTTCATTTTCTTTACCTGCC	chrX:6500354-6500394	GCGGCTCTTATATACTACCG
chrX_C4	CGATTACCCGATAGGACGAATACAGCTCTTGTCACTTCTATCTCAGAATATCCTAAATACGCGGCTCTTATATACTACCG	CGATTACCCGATAGGACGAA	TACAGCTCTTGTCACTTCTATCTCAGAATATCCTAAATAC	chrX:6500429-6500469	GCGGCTCTTATATACTACCG
chrX_C4	CGATTACCCGATAGGACGAAGATCACTCCTCATTGAGTATGAGAGTCAATTGAGTCATTGGCGGCTCTTATATACTACCG	CGATTACCCGATAGGACGAA	GATCACTCCTCATTGAGTATGAGAGTCAATTGAGTCATTG	chrX:6500471-6500511	GCGGCTCTTATATACTACCG
chrX_C4	CGATTACCCGATAGGACGAATATTAGCATCATTTGCTGCTCCCCTTGTCTATCCCAGATAGCGGCTCTTATATACTACCG	CGATTACCCGATAGGACGAA	TATTAGCATCATTTGCTGCTCCCCTTGTCTATCCCAGATA	chrX:6500513-6500553	GCGGCTCTTATATACTACCG
chrX_C4	CGATTACCCGATAGGACGAATTTTCTTATGGTCCAGGAAAACACCCACCTCTAGCAGCTTGCGGCTCTTATATACTACCG	CGATTACCCGATAGGACGAA	TTTTCTTATGGTCCAGGAAAACACCCACCTCTAGCAGCTT	chrX:6500558-6500598	GCGGCTCTTATATACTACCG
chrX_C4	CGATTACCCGATAGGACGAACCTCACCATGTCAAGTCACACAGGAAAACTAAATCTTCTCGCGGCTCTTATATACTACCG	CGATTACCCGATAGGACGAA	CCTCACCATGTCAAGTCACACAGGAAAACTAAATCTTCTC	chrX:6500600-6500640	GCGGCTCTTATATACTACCG
chrX_C4	CGATTACCCGATAGGACGAAGCATCATTACTACCCTCTCATCAGATTGCCCATAATTCTTGCGGCTCTTATATACTACCG	CGATTACCCGATAGGACGAA	GCATCATTACTACCCTCTCATCAGATTGCCCATAATTCTT	chrX:6500642-6500682	GCGGCTCTTATATACTACCG
chrX_C4	CGATTACCCGATAGGACGAACTACTCAGTATGACTGGAACTAAAGTAGTACAAACAATCAGCGGCTCTTATATACTACCG	CGATTACCCGATAGGACGAA	CTACTCAGTATGACTGGAACTAAAGTAGTACAAACAATCA	chrX:6500684-6500724	GCGGCTCTTATATACTACCG
chrX_C4	CGATTACCCGATAGGACGAATTTTGTGTGAGCACATTGTATAAGAAGCCAGATAAAGGCAGCGGCTCTTATATACTACCG	CGATTACCCGATAGGACGAA	TTTTGTGTGAGCACATTGTATAAGAAGCCAGATAAAGGCA	chrX:6500743-6500783	GCGGCTCTTATATACTACCG
chrX_C4	CGATTACCCGATAGGACGAACCAATCTAAAGTGGGTGCTGGGAACCAATTCTGTAAGACTGCGGCTCTTATATACTACCG	CGATTACCCGATAGGACGAA	CCAATCTAAAGTGGGTGCTGGGAACCAATTCTGTAAGACT	chrX:6500820-6500860	GCGGCTCTTATATACTACCG
chrX_C4	CGATTACCCGATAGGACGAACGAACACTCTCAACCACTGACCTTATCTCCACCCTCTCCCGCGGCTCTTATATACTACCG	CGATTACCCGATAGGACGAA	CGAACACTCTCAACCACTGACCTTATCTCCACCCTCTCCC	chrX:6500862-6500902	GCGGCTCTTATATACTACCG
chrX_C4	CGATTACCCGATAGGACGAAGCTTTTACTGTTCCTGATGTTCATGTCATATCATATAGACGCGGCTCTTATATACTACCG	CGATTACCCGATAGGACGAA	GCTTTTACTGTTCCTGATGTTCATGTCATATCATATAGAC	chrX:6500911-6500951	GCGGCTCTTATATACTACCG
chrX_C4	CGATTACCCGATAGGACGAAACCGAGTCTCTTTCATTTAACACAATATGATGTTTCTGAGGCGGCTCTTATATACTACCG	CGATTACCCGATAGGACGAA	ACCGAGTCTCTTTCATTTAACACAATATGATGTTTCTGAG	chrX:6500962-6501002	GCGGCTCTTATATACTACCG
chrX_C4	CGATTACCCGATAGGACGAAGGGGCTTCTAGAGTGGTTGTATAGTTGTGTACTCCTGCTAGCGGCTCTTATATACTACCG	CGATTACCCGATAGGACGAA	GGGGCTTCTAGAGTGGTTGTATAGTTGTGTACTCCTGCTA	chrX:6501056-6501096	GCGGCTCTTATATACTACCG
chrX_C4	CGATTACCCGATAGGACGAAATTGAGCATGTTTTATAAGCTTCTTTAGCATTTGGCTCTGGCGGCTCTTATATACTACCG	CGATTACCCGATAGGACGAA	ATTGAGCATGTTTTATAAGCTTCTTTAGCATTTGGCTCTG	chrX:6501238-6501278	GCGGCTCTTATATACTACCG
chrX_C4	CGATTACCCGATAGGACGAAGTTTAGTGGAGTGAATGTTCAGAATTTGTTGCCAATTGTTGCGGCTCTTATATACTACCG	CGATTACCCGATAGGACGAA	GTTTAGTGGAGTGAATGTTCAGAATTTGTTGCCAATTGTT	chrX:6501280-6501320	GCGGCTCTTATATACTACCG
chrX_C4	CGATTACCCGATAGGACGAATTGGCTGTTTGTTGCAGTTTCCAGTATTCTAAGTGTATAAGCGGCTCTTATATACTACCG	CGATTACCCGATAGGACGAA	TTGGCTGTTTGTTGCAGTTTCCAGTATTCTAAGTGTATAA	chrX:6501322-6501362	GCGGCTCTTATATACTACCG
chrX_C4	CGATTACCCGATAGGACGAACCCCAACCTCCTCGAAATATTTTCTACCAGTCCTTTGTCAGCGGCTCTTATATACTACCG	CGATTACCCGATAGGACGAA	CCCCAACCTCCTCGAAATATTTTCTACCAGTCCTTTGTCA	chrX:6501427-6501467	GCGGCTCTTATATACTACCG
chrX_C4	CGATTACCCGATAGGACGAATACATGTTGTGAATATTTTCCTAGCTCGTGCTTTGTGCTTGCGGCTCTTATATACTACCG	CGATTACCCGATAGGACGAA	TACATGTTGTGAATATTTTCCTAGCTCGTGCTTTGTGCTT	chrX:6501469-6501509	GCGGCTCTTATATACTACCG
chrX_C4	CGATTACCCGATAGGACGAATTTTGGGTTCTTTTGTGATTTCTGACTTTCGCATCCTTCTGCGGCTCTTATATACTACCG	CGATTACCCGATAGGACGAA	TTTTGGGTTCTTTTGTGATTTCTGACTTTCGCATCCTTCT	chrX:6501546-6501586	GCGGCTCTTATATACTACCG
chrX_C4	CGATTACCCGATAGGACGAAAGAAGCCTCTACCCACTTCAAGGTCACAAATACTATTCCTGCGGCTCTTATATACTACCG	CGATTACCCGATAGGACGAA	AGAAGCCTCTACCCACTTCAAGGTCACAAATACTATTCCT	chrX:6501588-6501628	GCGGCTCTTATATACTACCG
chrX_C4	CGATTACCCGATAGGACGAAGAATTCTTCGACCAGTTTCACTTTCTAAACTCTCTAGGCCGCGGCTCTTATATACTACCG	CGATTACCCGATAGGACGAA	GAATTCTTCGACCAGTTTCACTTTCTAAACTCTCTAGGCC	chrX:6501630-6501670	GCGGCTCTTATATACTACCG
chrX_C4	CGATTACCCGATAGGACGAAAAAACCTCTCTCATAAACAAATGGCTTGGGTTGATAAAGTGCGGCTCTTATATACTACCG	CGATTACCCGATAGGACGAA	AAAACCTCTCTCATAAACAAATGGCTTGGGTTGATAAAGT	chrX:6501791-6501831	GCGGCTCTTATATACTACCG
chrX_C4	CGATTACCCGATAGGACGAACCCCTGCTAAGAGTGGAAGAGACCTTCCATTCATTCTGATGCGGCTCTTATATACTACCG	CGATTACCCGATAGGACGAA	CCCCTGCTAAGAGTGGAAGAGACCTTCCATTCATTCTGAT	chrX:6501834-6501874	GCGGCTCTTATATACTACCG
chrX_C4	CGATTACCCGATAGGACGAAAGTATGGAGGGAGTAGAACCATCTTCTTTGACAGAAACAAGCGGCTCTTATATACTACCG	CGATTACCCGATAGGACGAA	AGTATGGAGGGAGTAGAACCATCTTCTTTGACAGAAACAA	chrX:6501876-6501916	GCGGCTCTTATATACTACCG
chrX_C4	CGATTACCCGATAGGACGAACCAGTCTTACTTTTGGTTGCTGAGTAAGCCACCACATTTAGCGGCTCTTATATACTACCG	CGATTACCCGATAGGACGAA	CCAGTCTTACTTTTGGTTGCTGAGTAAGCCACCACATTTA	chrX:6501918-6501958	GCGGCTCTTATATACTACCG
chrX_C4	CGATTACCCGATAGGACGAATGCCTTGCCCTCATTCTTATCAACACATTCCTAGAGCTGAGCGGCTCTTATATACTACCG	CGATTACCCGATAGGACGAA	TGCCTTGCCCTCATTCTTATCAACACATTCCTAGAGCTGA	chrX:6501960-6502000	GCGGCTCTTATATACTACCG
chrX_C4	CGATTACCCGATAGGACGAATTGGCTCTGGGCTCACTGAGGTTTTGGCATGGATGCTCAGGCGGCTCTTATATACTACCG	CGATTACCCGATAGGACGAA	TTGGCTCTGGGCTCACTGAGGTTTTGGCATGGATGCTCAG	chrX:6502002-6502042	GCGGCTCTTATATACTACCG
chrX_C4	CGATTACCCGATAGGACGAATTTGACTTGGCCTAGTCCCTGGAGAAATGGAATGACTCAAGCGGCTCTTATATACTACCG	CGATTACCCGATAGGACGAA	TTTGACTTGGCCTAGTCCCTGGAGAAATGGAATGACTCAA	chrX:6502044-6502084	GCGGCTCTTATATACTACCG
chrX_C4	CGATTACCCGATAGGACGAACTTTAAATCCCTTTGTTATGAGGCTTTGTAAACTAGATGGGCGGCTCTTATATACTACCG	CGATTACCCGATAGGACGAA	CTTTAAATCCCTTTGTTATGAGGCTTTGTAAACTAGATGG	chrX:6502086-6502126	GCGGCTCTTATATACTACCG
chrX_C4	CGATTACCCGATAGGACGAAATTAAGCACTTGGGGAAGATGGTGTCTGTAGGGATAGATGGCGGCTCTTATATACTACCG	CGATTACCCGATAGGACGAA	ATTAAGCACTTGGGGAAGATGGTGTCTGTAGGGATAGATG	chrX:6502128-6502168	GCGGCTCTTATATACTACCG
chrX_C4	CGATTACCCGATAGGACGAAACTATGGGCCACATCAGAATTCTATTTACTCACGATCAGGGCGGCTCTTATATACTACCG	CGATTACCCGATAGGACGAA	ACTATGGGCCACATCAGAATTCTATTTACTCACGATCAGG	chrX:6502170-6502210	GCGGCTCTTATATACTACCG
chrX_C4	CGATTACCCGATAGGACGAAATTCCTTGGGACAGATCCACAGGACAGCTCCTTGTAGGATGCGGCTCTTATATACTACCG	CGATTACCCGATAGGACGAA	ATTCCTTGGGACAGATCCACAGGACAGCTCCTTGTAGGAT	chrX:6502212-6502252	GCGGCTCTTATATACTACCG
chrX_C4	CGATTACCCGATAGGACGAAGCTTACCGGCTTCTTGGCTGGCAAAGGACTTCTCCCCTGGGCGGCTCTTATATACTACCG	CGATTACCCGATAGGACGAA	GCTTACCGGCTTCTTGGCTGGCAAAGGACTTCTCCCCTGG	chrX:6502254-6502294	GCGGCTCTTATATACTACCG
chrX_C4	CGATTACCCGATAGGACGAATAGGGAAGATGAAATTAGGTGCAGTAGAAATCTTTGTTTCGCGGCTCTTATATACTACCG	CGATTACCCGATAGGACGAA	TAGGGAAGATGAAATTAGGTGCAGTAGAAATCTTTGTTTC	chrX:6502437-6502477	GCGGCTCTTATATACTACCG
chrX_C4	CGATTACCCGATAGGACGAATTTAGTGACTGAGAGTAATTTGAGAGACAAGTTAAGGTAGGCGGCTCTTATATACTACCG	CGATTACCCGATAGGACGAA	TTTAGTGACTGAGAGTAATTTGAGAGACAAGTTAAGGTAG	chrX:6502503-6502543	GCGGCTCTTATATACTACCG
chrX_C4	CGATTACCCGATAGGACGAAAGTGTCTATAAACTAGAATCAGAGTGTTGACAACCATAGCGCGGCTCTTATATACTACCG	CGATTACCCGATAGGACGAA	AGTGTCTATAAACTAGAATCAGAGTGTTGACAACCATAGC	chrX:6502545-6502585	GCGGCTCTTATATACTACCG
chrX_C4	CGATTACCCGATAGGACGAAGGACATTGCAGAGGTTTCAAAGCCCACATCCGCTCTTCTCGCGGCTCTTATATACTACCG	CGATTACCCGATAGGACGAA	GGACATTGCAGAGGTTTCAAAGCCCACATCCGCTCTTCTC	chrX:6502587-6502627	GCGGCTCTTATATACTACCG
chrX_C4	CGATTACCCGATAGGACGAAGGCACCCTGATTAATTTCTCGTGGCATGAAGAGATCTCAAGCGGCTCTTATATACTACCG	CGATTACCCGATAGGACGAA	GGCACCCTGATTAATTTCTCGTGGCATGAAGAGATCTCAA	chrX:6502629-6502669	GCGGCTCTTATATACTACCG
chrX_C4	CGATTACCCGATAGGACGAATAGCATCAGGGATGAGGGGAAAGGTCAGAACCAGCCCACAGCGGCTCTTATATACTACCG	CGATTACCCGATAGGACGAA	TAGCATCAGGGATGAGGGGAAAGGTCAGAACCAGCCCACA	chrX:6502673-6502713	GCGGCTCTTATATACTACCG
chrX_C4	CGATTACCCGATAGGACGAACTGAGGTGTGCTTATGATTTCACACTACTGCTCTGAAGGAGCGGCTCTTATATACTACCG	CGATTACCCGATAGGACGAA	CTGAGGTGTGCTTATGATTTCACACTACTGCTCTGAAGGA	chrX:6502715-6502755	GCGGCTCTTATATACTACCG
chrX_C4	CGATTACCCGATAGGACGAAAGGACTTTACTCGTTCATTGGTGAGTACATTTCATAATAGGCGGCTCTTATATACTACCG	CGATTACCCGATAGGACGAA	AGGACTTTACTCGTTCATTGGTGAGTACATTTCATAATAG	chrX:6502758-6502798	GCGGCTCTTATATACTACCG
chrX_C4	CGATTACCCGATAGGACGAAGCTTGCCAAAGCCAGCTTACCTTCATCTATACATCTCATTGCGGCTCTTATATACTACCG	CGATTACCCGATAGGACGAA	GCTTGCCAAAGCCAGCTTACCTTCATCTATACATCTCATT	chrX:6502802-6502842	GCGGCTCTTATATACTACCG
chrX_C4	CGATTACCCGATAGGACGAAACTGATATCCCATAATGGGACATGCTGATGATATTAAAGTGCGGCTCTTATATACTACCG	CGATTACCCGATAGGACGAA	ACTGATATCCCATAATGGGACATGCTGATGATATTAAAGT	chrX:6502844-6502884	GCGGCTCTTATATACTACCG
chrX_C4	CGATTACCCGATAGGACGAACCCAAAGTGAGGTCCAGCTCAAGGGGAGGCCAGTGATACATTCGTTTGATAACAACTCGA	CGATTACCCGATAGGACGAA	CCCAAAGTGAGGTCCAGCTCAAGGGGAGGCCAGTGATACA	chrX:7495601-7495641	TTCGTTTGATAACAACTCGA
chrX_C4	CGATTACCCGATAGGACGAAACAGGAGCTCTAACACACCCAGGATCATAGCTCTGCACACTTCGTTTGATAACAACTCGA	CGATTACCCGATAGGACGAA	ACAGGAGCTCTAACACACCCAGGATCATAGCTCTGCACAC	chrX:7495730-7495770	TTCGTTTGATAACAACTCGA
chrX_C4	CGATTACCCGATAGGACGAAGGACTCCCAAGAGTTCTAACATGCCCAGGATCATAACTCTTTCGTTTGATAACAACTCGA	CGATTACCCGATAGGACGAA	GGACTCCCAAGAGTTCTAACATGCCCAGGATCATAACTCT	chrX:7495795-7495835	TTCGTTTGATAACAACTCGA
chrX_C4	CGATTACCCGATAGGACGAACCCTTAAAGAGAAAACACACACACACACACAAAATCCCTTTTCGTTTGATAACAACTCGA	CGATTACCCGATAGGACGAA	CCCTTAAAGAGAAAACACACACACACACACAAAATCCCTT	chrX:7496340-7496380	TTCGTTTGATAACAACTCGA
chrX_C4	CGATTACCCGATAGGACGAATGCCCATAAACATACAAGAAGCCTACAAATAGACTCGACCTTCGTTTGATAACAACTCGA	CGATTACCCGATAGGACGAA	TGCCCATAAACATACAAGAAGCCTACAAATAGACTCGACC	chrX:7496785-7496825	TTCGTTTGATAACAACTCGA
chrX_C4	CGATTACCCGATAGGACGAAATAGATGGAAAATTTCAACACAAGGAGGGTACTATATGCTTTCGTTTGATAACAACTCGA	CGATTACCCGATAGGACGAA	ATAGATGGAAAATTTCAACACAAGGAGGGTACTATATGCT	chrX:7497147-7497187	TTCGTTTGATAACAACTCGA
chrX_C4	CGATTACCCGATAGGACGAAAAAAGACATAGACTGATGGATTGGATATGGGACCCAGCATTTCGTTTGATAACAACTCGA	CGATTACCCGATAGGACGAA	AAAAGACATAGACTGATGGATTGGATATGGGACCCAGCAT	chrX:7497267-7497307	TTCGTTTGATAACAACTCGA
chrX_C4	CGATTACCCGATAGGACGAAAGAAACAAGCTGGAGTAGCCACTAATATTGGATAAAATTGTTCGTTTGATAACAACTCGA	CGATTACCCGATAGGACGAA	AGAAACAAGCTGGAGTAGCCACTAATATTGGATAAAATTG	chrX:7497400-7497440	TTCGTTTGATAACAACTCGA
chrX_C4	CGATTACCCGATAGGACGAATGGAAAACACACATACATACATATGGAAACTGAACAACACTTCGTTTGATAACAACTCGA	CGATTACCCGATAGGACGAA	TGGAAAACACACATACATACATATGGAAACTGAACAACAC	chrX:7497910-7497950	TTCGTTTGATAACAACTCGA
chrX_C4	CGATTACCCGATAGGACGAAGTACCAGGTACCAAAATTAAATCAGGATATATGGTTCAAGTTCGTTTGATAACAACTCGA	CGATTACCCGATAGGACGAA	GTACCAGGTACCAAAATTAAATCAGGATATATGGTTCAAG	chrX:7498483-7498523	TTCGTTTGATAACAACTCGA
chrX_C4	CGATTACCCGATAGGACGAAAAAACTTAAATCCAGGCCACACCTTATATTCAGGTGGACCTTCGTTTGATAACAACTCGA	CGATTACCCGATAGGACGAA	AAAACTTAAATCCAGGCCACACCTTATATTCAGGTGGACC	chrX:7498734-7498774	TTCGTTTGATAACAACTCGA
chrX_C4	CGATTACCCGATAGGACGAAGCAGTGAAGGAGTTGGAAAACAGAAAGCAAGGGGACCATGTTCGTTTGATAACAACTCGA	CGATTACCCGATAGGACGAA	GCAGTGAAGGAGTTGGAAAACAGAAAGCAAGGGGACCATG	chrX:7498866-7498906	TTCGTTTGATAACAACTCGA
chrX_C4	CGATTACCCGATAGGACGAAGTACCTCGTGCTGCAGCTGTACTTGGTAGTAAGAGTCACCTTCGTTTGATAACAACTCGA	CGATTACCCGATAGGACGAA	GTACCTCGTGCTGCAGCTGTACTTGGTAGTAAGAGTCACC	chrX:7499123-7499163	TTCGTTTGATAACAACTCGA
chrX_C4	CGATTACCCGATAGGACGAAGCCTCAGTTGTAGCTGATGGCCCAGAACTGGTCATGCAAATTCGTTTGATAACAACTCGA	CGATTACCCGATAGGACGAA	GCCTCAGTTGTAGCTGATGGCCCAGAACTGGTCATGCAAA	chrX:7499258-7499298	TTCGTTTGATAACAACTCGA
chrX_C4	CGATTACCCGATAGGACGAATGTTGAGGCTTGGCACCATGAAGAGAAACCTATGAAAAGCTTCGTTTGATAACAACTCGA	CGATTACCCGATAGGACGAA	TGTTGAGGCTTGGCACCATGAAGAGAAACCTATGAAAAGC	chrX:7499300-7499340	TTCGTTTGATAACAACTCGA
chrX_C4	CGATTACCCGATAGGACGAATTGGAGGAGCCCAGAAGATCATGTGTGAAATAATAAACTGTTCGTTTGATAACAACTCGA	CGATTACCCGATAGGACGAA	TTGGAGGAGCCCAGAAGATCATGTGTGAAATAATAAACTG	chrX:7499492-7499532	TTCGTTTGATAACAACTCGA
chrX_C4	CGATTACCCGATAGGACGAAGGGGTCAGGTAGTGGAATGTGATGTTTGTATATGCTAGTCTTCGTTTGATAACAACTCGA	CGATTACCCGATAGGACGAA	GGGGTCAGGTAGTGGAATGTGATGTTTGTATATGCTAGTC	chrX:7499930-7499970	TTCGTTTGATAACAACTCGA
chrX_C4	CGATTACCCGATAGGACGAACTCCTCCTGTACCATGTCTGCCTGATGCTGCCATGCCTTGTTCGTTTGATAACAACTCGA	CGATTACCCGATAGGACGAA	CTCCTCCTGTACCATGTCTGCCTGATGCTGCCATGCCTTG	chrX:7500111-7500151	TTCGTTTGATAACAACTCGA
chrX_C4	CGATTACCCGATAGGACGAAGATAATGGACTGAACCCCAAAAGTCAGCTATACTATTCTTTTCGTTTGATAACAACTCGA	CGATTACCCGATAGGACGAA	GATAATGGACTGAACCCCAAAAGTCAGCTATACTATTCTT	chrX:7500153-7500193	TTCGTTTGATAACAACTCGA
chrX_C4	CGATTACCCGATAGGACGAAAAAACATGAAATATCAAGACTCTACCTCCCAAAGTCCCCATTCGTTTGATAACAACTCGA	CGATTACCCGATAGGACGAA	AAAACATGAAATATCAAGACTCTACCTCCCAAAGTCCCCA	chrX:7500558-7500598	TTCGTTTGATAACAACTCGA
chrX_C4	CGATTACCCGATAGGACGAAACCTCCCCAAACAGTGCCGCCAACTGAGTGTGCAAATACCTTCGTTTGATAACAACTCGA	CGATTACCCGATAGGACGAA	ACCTCCCCAAACAGTGCCGCCAACTGAGTGTGCAAATACC	chrX:7500600-7500640	TTCGTTTGATAACAACTCGA
chrX_C4	CGATTACCCGATAGGACGAAAACCCATGAGAAGCACATCTCATCCAAACCACCTCAACCATTCGTTTGATAACAACTCGA	CGATTACCCGATAGGACGAA	AACCCATGAGAAGCACATCTCATCCAAACCACCTCAACCA	chrX:7500642-7500682	TTCGTTTGATAACAACTCGA
chrX_C4	CGATTACCCGATAGGACGAACAGGCAGGTTTAGTCAAAGTTAAAAGAACCGACCAACGATTTCGTTTGATAACAACTCGA	CGATTACCCGATAGGACGAA	CAGGCAGGTTTAGTCAAAGTTAAAAGAACCGACCAACGAT	chrX:7500684-7500724	TTCGTTTGATAACAACTCGA
chrX_C4	CGATTACCCGATAGGACGAATGAGATACCAGGAAGAGCAAGATCAAGAATGTGTTGCCATTTCGTTTGATAACAACTCGA	CGATTACCCGATAGGACGAA	TGAGATACCAGGAAGAGCAAGATCAAGAATGTGTTGCCAT	chrX:7500726-7500766	TTCGTTTGATAACAACTCGA
chrX_C4	CGATTACCCGATAGGACGAACCTAGAAGAGAAGAAGCAAGGGGAAGAAACAGTGTTGTCATTCGTTTGATAACAACTCGA	CGATTACCCGATAGGACGAA	CCTAGAAGAGAAGAAGCAAGGGGAAGAAACAGTGTTGTCA	chrX:7500768-7500808	TTCGTTTGATAACAACTCGA
chrX_C4	CGATTACCCGATAGGACGAACCAGTGGCTATAACTAAAGCAGCGGTAGAGGGGTCATGAGTTCGTTTGATAACAACTCGA	CGATTACCCGATAGGACGAA	CCAGTGGCTATAACTAAAGCAGCGGTAGAGGGGTCATGAG	chrX:7500810-7500850	TTCGTTTGATAACAACTCGA
chrX_C4	CGATTACCCGATAGGACGAAAGGAACTCTGGCTACAGTTAGACAACCAAAAGCATTAATATTCGTTTGATAACAACTCGA	CGATTACCCGATAGGACGAA	AGGAACTCTGGCTACAGTTAGACAACCAAAAGCATTAATA	chrX:7500852-7500892	TTCGTTTGATAACAACTCGA
chrX_C4	CGATTACCCGATAGGACGAAATCACAGCCAGGCAGGGAGTAGAGGACAGGCAGGACACATTTCGTTTGATAACAACTCGA	CGATTACCCGATAGGACGAA	ATCACAGCCAGGCAGGGAGTAGAGGACAGGCAGGACACAT	chrX:7500894-7500934	TTCGTTTGATAACAACTCGA
chrX_C4	CGATTACCCGATAGGACGAATGTCCACAAACTGGTTAAGTATACTCAAATCTTCTAGAACTTCGTTTGATAACAACTCGA	CGATTACCCGATAGGACGAA	TGTCCACAAACTGGTTAAGTATACTCAAATCTTCTAGAAC	chrX:7500947-7500987	TTCGTTTGATAACAACTCGA
chrX_C4	CGATTACCCGATAGGACGAATACATTGTTCTACTTCATCCAGAAGTTGAGAACATAGTAGTTCGTTTGATAACAACTCGA	CGATTACCCGATAGGACGAA	TACATTGTTCTACTTCATCCAGAAGTTGAGAACATAGTAG	chrX:7501021-7501061	TTCGTTTGATAACAACTCGA
chrX_C4	CGATTACCCGATAGGACGAACAAGAAGTGGAATCTAATTCTTCACCATTTAAATATGGGCTTCGTTTGATAACAACTCGA	CGATTACCCGATAGGACGAA	CAAGAAGTGGAATCTAATTCTTCACCATTTAAATATGGGC	chrX:7501093-7501133	TTCGTTTGATAACAACTCGA
chrX_C4	CGATTACCCGATAGGACGAAACAGATTATACAATTTCTGCTATGAGAAAACCCAAGAGAGTTCGTTTGATAACAACTCGA	CGATTACCCGATAGGACGAA	ACAGATTATACAATTTCTGCTATGAGAAAACCCAAGAGAG	chrX:7501155-7501195	TTCGTTTGATAACAACTCGA
chrX_C4	CGATTACCCGATAGGACGAATCTGGGTAGGTAAATATTCTAGCCAAAAGTCTCTGAAGAGTTCGTTTGATAACAACTCGA	CGATTACCCGATAGGACGAA	TCTGGGTAGGTAAATATTCTAGCCAAAAGTCTCTGAAGAG	chrX:7501197-7501237	TTCGTTTGATAACAACTCGA
chrX_C4	CGATTACCCGATAGGACGAAAAAATCTACTATCCATCTCATGTTCTCTAGACAGGGCCTTTTCGTTTGATAACAACTCGA	CGATTACCCGATAGGACGAA	AAAATCTACTATCCATCTCATGTTCTCTAGACAGGGCCTT	chrX:7501257-7501297	TTCGTTTGATAACAACTCGA
chrX_C4	CGATTACCCGATAGGACGAATGCCTACATGTACTTCTATAAACTGTGTATATGTAGTCACTTCGTTTGATAACAACTCGA	CGATTACCCGATAGGACGAA	TGCCTACATGTACTTCTATAAACTGTGTATATGTAGTCAC	chrX:7501364-7501404	TTCGTTTGATAACAACTCGA
chrX_C4	CGATTACCCGATAGGACGAAAGGTCATCTGAAAGAGTAGCAGGAGCTTTTAAACCTCTGATTCGTTTGATAACAACTCGA	CGATTACCCGATAGGACGAA	AGGTCATCTGAAAGAGTAGCAGGAGCTTTTAAACCTCTGA	chrX:7501494-7501534	TTCGTTTGATAACAACTCGA
chrX_C4	CGATTACCCGATAGGACGAACATCTCTCAAGTCCCACCAAAGACAGAGTTGTAGGAGAAATTCGTTTGATAACAACTCGA	CGATTACCCGATAGGACGAA	CATCTCTCAAGTCCCACCAAAGACAGAGTTGTAGGAGAAA	chrX:7501536-7501576	TTCGTTTGATAACAACTCGA
chrX_C4	CGATTACCCGATAGGACGAATTATCTCACATGTGCACATGGGAATATGAATGAATAACAGTTCGTTTGATAACAACTCGA	CGATTACCCGATAGGACGAA	TTATCTCACATGTGCACATGGGAATATGAATGAATAACAG	chrX:7501603-7501643	TTCGTTTGATAACAACTCGA
chrX_C4	CGATTACCCGATAGGACGAATTTTATATACCAACTTAGGCTAAAGCAGAAAGAAGAGTGGTTCGTTTGATAACAACTCGA	CGATTACCCGATAGGACGAA	TTTTATATACCAACTTAGGCTAAAGCAGAAAGAAGAGTGG	chrX:7501654-7501694	TTCGTTTGATAACAACTCGA
chrX_C4	CGATTACCCGATAGGACGAAAAAACTGTAACCATGAAAAGTGGGATGGGGTATATAGGGTTTCGTTTGATAACAACTCGA	CGATTACCCGATAGGACGAA	AAAACTGTAACCATGAAAAGTGGGATGGGGTATATAGGGT	chrX:7501712-7501752	TTCGTTTGATAACAACTCGA
chrX_C4	CGATTACCCGATAGGACGAAGGTAAATTTCATTTTATGGATTTAAGCCTGCACTTTCTCCTTCGTTTGATAACAACTCGA	CGATTACCCGATAGGACGAA	GGTAAATTTCATTTTATGGATTTAAGCCTGCACTTTCTCC	chrX:7501757-7501797	TTCGTTTGATAACAACTCGA
chrX_C4	CGATTACCCGATAGGACGAATGATTTCAGAGTCTTCCTTCAGGCTGGAGGGATGTCTCAGTTCGTTTGATAACAACTCGA	CGATTACCCGATAGGACGAA	TGATTTCAGAGTCTTCCTTCAGGCTGGAGGGATGTCTCAG	chrX:7501799-7501839	TTCGTTTGATAACAACTCGA
chrX_C4	CGATTACCCGATAGGACGAAATTAAGAGCACTGGGCTGTAGTTTCAGGGGACCCTGGTTCTTCGTTTGATAACAACTCGA	CGATTACCCGATAGGACGAA	ATTAAGAGCACTGGGCTGTAGTTTCAGGGGACCCTGGTTC	chrX:7501841-7501881	TTCGTTTGATAACAACTCGA
chrX_C4	CGATTACCCGATAGGACGAAAACATCAAGCTAATTAGGTTATTAAGGGAGAAAACAGGTGTTCGTTTGATAACAACTCGA	CGATTACCCGATAGGACGAA	AACATCAAGCTAATTAGGTTATTAAGGGAGAAAACAGGTG	chrX:7502179-7502219	TTCGTTTGATAACAACTCGA
chrX_C4	CGATTACCCGATAGGACGAAGTAATGTTTAGCATAACTCTTTCCATTTTGGTTTGTTCGGTTCGTTTGATAACAACTCGA	CGATTACCCGATAGGACGAA	GTAATGTTTAGCATAACTCTTTCCATTTTGGTTTGTTCGG	chrX:7502298-7502338	TTCGTTTGATAACAACTCGA
chrX_C4	CGATTACCCGATAGGACGAAATTAGGGCCTTAGTGCAGGAACTCTATGCAAAGGCCTGGTTTCGTTTGATAACAACTCGA	CGATTACCCGATAGGACGAA	ATTAGGGCCTTAGTGCAGGAACTCTATGCAAAGGCCTGGT	chrX:7502340-7502380	TTCGTTTGATAACAACTCGA
chrX_C4	CGATTACCCGATAGGACGAACTCACAATTCTGTTCAACAGATCCTAAGTCTAGGATAGTCTTCGTTTGATAACAACTCGA	CGATTACCCGATAGGACGAA	CTCACAATTCTGTTCAACAGATCCTAAGTCTAGGATAGTC	chrX:7502382-7502422	TTCGTTTGATAACAACTCGA
chrX_C4	CGATTACCCGATAGGACGAAGTGTGTACACAAGTGCATGTGCACACAGAGGCTGGAAGACTTCGTTTGATAACAACTCGA	CGATTACCCGATAGGACGAA	GTGTGTACACAAGTGCATGTGCACACAGAGGCTGGAAGAC	chrX:7502542-7502582	TTCGTTTGATAACAACTCGA
chrX_C4	CGATTACCCGATAGGACGAACATCAGATAGATTCCTTGGGTTGTTAAGTGACTGACTCCATTCGTTTGATAACAACTCGA	CGATTACCCGATAGGACGAA	CATCAGATAGATTCCTTGGGTTGTTAAGTGACTGACTCCA	chrX:7502584-7502624	TTCGTTTGATAACAACTCGA
chrX_C4	CGATTACCCGATAGGACGAACTCTGCAAGAGCAGTGCACACTTTTAGCCACTAACACTAATTCGTTTGATAACAACTCGA	CGATTACCCGATAGGACGAA	CTCTGCAAGAGCAGTGCACACTTTTAGCCACTAACACTAA	chrX:7502647-7502687	TTCGTTTGATAACAACTCGA
chrX_C4	CGATTACCCGATAGGACGAACTGCCACTACAACTAACAGATTATCAAGGTAAAGGCATACTTCGTTTGATAACAACTCGA	CGATTACCCGATAGGACGAA	CTGCCACTACAACTAACAGATTATCAAGGTAAAGGCATAC	chrX:7502689-7502729	TTCGTTTGATAACAACTCGA
chrX_C4	CGATTACCCGATAGGACGAATTTACTTAAGTATACGTTTCATATGGCACAGGAGCCTTAATTCGTTTGATAACAACTCGA	CGATTACCCGATAGGACGAA	TTTACTTAAGTATACGTTTCATATGGCACAGGAGCCTTAA	chrX:7502731-7502771	TTCGTTTGATAACAACTCGA
chrX_C4	CGATTACCCGATAGGACGAAAAGGGGAGTTATATGTTGCTATAGTTATATGTTGCTAAGGTTCGTTTGATAACAACTCGA	CGATTACCCGATAGGACGAA	AAGGGGAGTTATATGTTGCTATAGTTATATGTTGCTAAGG	chrX:7502907-7502947	TTCGTTTGATAACAACTCGA
chrX_C4	CGATTACCCGATAGGACGAACAGTAAAGAAGGCCAGGGGCCAATTGTTGGAAGGTACAGGTTCGTTTGATAACAACTCGA	CGATTACCCGATAGGACGAA	CAGTAAAGAAGGCCAGGGGCCAATTGTTGGAAGGTACAGG	chrX:7502976-7503016	TTCGTTTGATAACAACTCGA
chrX_C4	CGATTACCCGATAGGACGAACCAGGTCCCAAGAGGAAAATGAGACTCAGGGAACGAGAGGTTCGTTTGATAACAACTCGA	CGATTACCCGATAGGACGAA	CCAGGTCCCAAGAGGAAAATGAGACTCAGGGAACGAGAGG	chrX:7503024-7503064	TTCGTTTGATAACAACTCGA
chrX_C4	CGATTACCCGATAGGACGAATTACTCTATGAATCCCTCCATCTTGAGAAATAAAGATACCTTCGTTTGATAACAACTCGA	CGATTACCCGATAGGACGAA	TTACTCTATGAATCCCTCCATCTTGAGAAATAAAGATACC	chrX:7503079-7503119	TTCGTTTGATAACAACTCGA
chrX_C4	CGATTACCCGATAGGACGAATATCCTATGAACAGAGAGGGTAGCTCTCACTTAACCCTATTTCGTTTGATAACAACTCGA	CGATTACCCGATAGGACGAA	TATCCTATGAACAGAGAGGGTAGCTCTCACTTAACCCTAT	chrX:7503121-7503161	TTCGTTTGATAACAACTCGA
chrX_C4	CGATTACCCGATAGGACGAAGATCATATCCAGGGGAATGTCAGAGTGTCTTTCCTGCAGTTTCGTTTGATAACAACTCGA	CGATTACCCGATAGGACGAA	GATCATATCCAGGGGAATGTCAGAGTGTCTTTCCTGCAGT	chrX:7503163-7503203	TTCGTTTGATAACAACTCGA
chrX_C4	CGATTACCCGATAGGACGAACAGTCAAAATATTCATTGTACCAAGACAGTATCTTCTAGGTTCGTTTGATAACAACTCGA	CGATTACCCGATAGGACGAA	CAGTCAAAATATTCATTGTACCAAGACAGTATCTTCTAGG	chrX:7503224-7503264	TTCGTTTGATAACAACTCGA
chrX_C4	CGATTACCCGATAGGACGAATTCCTTATCCTTTCCCACTATGGTGGGACTCCGTGCACTATTCGTTTGATAACAACTCGA	CGATTACCCGATAGGACGAA	TTCCTTATCCTTTCCCACTATGGTGGGACTCCGTGCACTA	chrX:7503266-7503306	TTCGTTTGATAACAACTCGA
chrX_C4	CGATTACCCGATAGGACGAAAAAATTCAAAATCAAGTCTTCACTTGCAACCAAGCATGGATTCGTTTGATAACAACTCGA	CGATTACCCGATAGGACGAA	AAAATTCAAAATCAAGTCTTCACTTGCAACCAAGCATGGA	chrX:7503314-7503354	TTCGTTTGATAACAACTCGA
chrX_C4	CGATTACCCGATAGGACGAATCAGGAGGCTGAGGCAGAAGGCTCTCAAGTTCAGTCAAACTTCGTTTGATAACAACTCGA	CGATTACCCGATAGGACGAA	TCAGGAGGCTGAGGCAGAAGGCTCTCAAGTTCAGTCAAAC	chrX:7503370-7503410	TTCGTTTGATAACAACTCGA
chrX_C4	CGATTACCCGATAGGACGAAAAAAGAAGAATGGTAGGCATACAAATAAGAAGGGGAGAAGTTCGTTTGATAACAACTCGA	CGATTACCCGATAGGACGAA	AAAAGAAGAATGGTAGGCATACAAATAAGAAGGGGAGAAG	chrX:7503458-7503498	TTCGTTTGATAACAACTCGA
chrX_C4	CGATTACCCGATAGGACGAATAAATAGCCTAAAGAATCCACCAGAAAATTCTTGATCCTGTTCGTTTGATAACAACTCGA	CGATTACCCGATAGGACGAA	TAAATAGCCTAAAGAATCCACCAGAAAATTCTTGATCCTG	chrX:7503534-7503574	TTCGTTTGATAACAACTCGA
chrX_C4	CGATTACCCGATAGGACGAAAAAAGGTGAGGAAACAATATCCCATTCACAATAGCTTAGATTCGTTTGATAACAACTCGA	CGATTACCCGATAGGACGAA	AAAAGGTGAGGAAACAATATCCCATTCACAATAGCTTAGA	chrX:7503664-7503704	TTCGTTTGATAACAACTCGA
chrX_C4	CGATTACCCGATAGGACGAAAAAACTGTAAGATACTGAAAACCTGGAGAAAACTCAAGCATTCGTTTGATAACAACTCGA	CGATTACCCGATAGGACGAA	AAAACTGTAAGATACTGAAAACCTGGAGAAAACTCAAGCA	chrX:7503754-7503794	TTCGTTTGATAACAACTCGA
chrX_C4	CGATTACCCGATAGGACGAAGACAGAATATGTACTGTGAAAATGGATATTTTCCCAAGGCTTCGTTTGATAACAACTCGA	CGATTACCCGATAGGACGAA	GACAGAATATGTACTGTGAAAATGGATATTTTCCCAAGGC	chrX:7503796-7503836	TTCGTTTGATAACAACTCGA
chrX_C4	CGATTACCCGATAGGACGAATTATTGCAATCCTTATCGAAATTCCAATGACATCTGTAGCTTCGTTTGATAACAACTCGA	CGATTACCCGATAGGACGAA	TTATTGCAATCCTTATCGAAATTCCAATGACATCTGTAGC	chrX:7503847-7503887	TTCGTTTGATAACAACTCGA
chrX_C4	CGATTACCCGATAGGACGAAACATTTAATAGAGTTTTCCACACTATCCTGCTGTGTGAACTTCGTTTGATAACAACTCGA	CGATTACCCGATAGGACGAA	ACATTTAATAGAGTTTTCCACACTATCCTGCTGTGTGAAC	chrX:7503889-7503929	TTCGTTTGATAACAACTCGA
chrX_C4	CGATTACCCGATAGGACGAATGTTCCTATAGAACGTTGTTTACTACACTAAGAGGAATGCTTCGTTTGATAACAACTCGA	CGATTACCCGATAGGACGAA	TGTTCCTATAGAACGTTGTTTACTACACTAAGAGGAATGC	chrX:7503931-7503971	TTCGTTTGATAACAACTCGA
chrX_C4	CGATTACCCGATAGGACGAACCCCTGCTCCAGGAATGCTCCAGGCAAAAGGTTTCCTCTCTTCGTTTGATAACAACTCGA	CGATTACCCGATAGGACGAA	CCCCTGCTCCAGGAATGCTCCAGGCAAAAGGTTTCCTCTC	chrX:7503974-7504014	TTCGTTTGATAACAACTCGA
chrX_C4	CGATTACCCGATAGGACGAACTCCTTAGAGATGAGATGCAGCTTACCACATTCAAGGAAGTTCGTTTGATAACAACTCGA	CGATTACCCGATAGGACGAA	CTCCTTAGAGATGAGATGCAGCTTACCACATTCAAGGAAG	chrX:7504016-7504056	TTCGTTTGATAACAACTCGA
chrX_C4	CGATTACCCGATAGGACGAACCCCGATAGGCCATGAGACTTTCTGTCTCTTGAGCACACCTTCGTTTGATAACAACTCGA	CGATTACCCGATAGGACGAA	CCCCGATAGGCCATGAGACTTTCTGTCTCTTGAGCACACC	chrX:7504069-7504109	TTCGTTTGATAACAACTCGA
chrX_C4	CGATTACCCGATAGGACGAAAAAATTCTCTGTATGCTTCTCTGCCCCTCCCTGCTTTGAATTCGTTTGATAACAACTCGA	CGATTACCCGATAGGACGAA	AAAATTCTCTGTATGCTTCTCTGCCCCTCCCTGCTTTGAA	chrX:7504124-7504164	TTCGTTTGATAACAACTCGA
chrX_C4	CGATTACCCGATAGGACGAACTGTACTCTGAGCTATCCAAATAAGGCTTTCTTGTGCAGCTTCGTTTGATAACAACTCGA	CGATTACCCGATAGGACGAA	CTGTACTCTGAGCTATCCAAATAAGGCTTTCTTGTGCAGC	chrX:7504166-7504206	TTCGTTTGATAACAACTCGA
chrX_C4	CGATTACCCGATAGGACGAAACCTTTGAGTCCGTGGTTCTGTTCCATCTCAAATTCAACTTTCGTTTGATAACAACTCGA	CGATTACCCGATAGGACGAA	ACCTTTGAGTCCGTGGTTCTGTTCCATCTCAAATTCAACT	chrX:7504208-7504248	TTCGTTTGATAACAACTCGA
chrX_C4	CGATTACCCGATAGGACGAAAGTTCTTCCTTACAAATCACTGGAGGATTTTAATAGCATGTTCGTTTGATAACAACTCGA	CGATTACCCGATAGGACGAA	AGTTCTTCCTTACAAATCACTGGAGGATTTTAATAGCATG	chrX:7504250-7504290	TTCGTTTGATAACAACTCGA
chrX_C4	CGATTACCCGATAGGACGAAGAACTAGAGGGAAGAAATCATATGGAAATACAAAACACTCTTCGTTTGATAACAACTCGA	CGATTACCCGATAGGACGAA	GAACTAGAGGGAAGAAATCATATGGAAATACAAAACACTC	chrX:7504296-7504336	TTCGTTTGATAACAACTCGA
chrX_C4	CGATTACCCGATAGGACGAACAGGAAGAGAAATATTGGAGATATTACAATATCTGTCCTCTTCGTTTGATAACAACTCGA	CGATTACCCGATAGGACGAA	CAGGAAGAGAAATATTGGAGATATTACAATATCTGTCCTC	chrX:7504357-7504397	TTCGTTTGATAACAACTCGA
chrX_C4	CGATTACCCGATAGGACGAAATTGTGCTACGGAGCCATACAGACAAAGACAAGATGATTGTTCGTTTGATAACAACTCGA	CGATTACCCGATAGGACGAA	ATTGTGCTACGGAGCCATACAGACAAAGACAAGATGATTG	chrX:7504399-7504439	TTCGTTTGATAACAACTCGA
chrX_C4	CGATTACCCGATAGGACGAAAACAGAAGATCCAAAATAAACTCATGGAGCTATAGTTACCTTCGTTTGATAACAACTCGA	CGATTACCCGATAGGACGAA	AACAGAAGATCCAAAATAAACTCATGGAGCTATAGTTACC	chrX:7504472-7504512	TTCGTTTGATAACAACTCGA
chrX_C4	CGATTACCCGATAGGACGAAAACAGACATTGTAGATAAGAAAGCGTTTTCATTAATGGCGTTCGTTTGATAACAACTCGA	CGATTACCCGATAGGACGAA	AACAGACATTGTAGATAAGAAAGCGTTTTCATTAATGGCG	chrX:7504535-7504575	TTCGTTTGATAACAACTCGA
chrX_C4	CGATTACCCGATAGGACGAAACTGAATATCCACATGTAGAAGGATGAAACTAGCAACCTGTTCGTTTGATAACAACTCGA	CGATTACCCGATAGGACGAA	ACTGAATATCCACATGTAGAAGGATGAAACTAGCAACCTG	chrX:7504583-7504623	TTCGTTTGATAACAACTCGA
chrX_C4	CGATTACCCGATAGGACGAATCTCAGCCTGAAACTAATTTAGGGAGACTGGAGAAATAGCTTCGTTTGATAACAACTCGA	CGATTACCCGATAGGACGAA	TCTCAGCCTGAAACTAATTTAGGGAGACTGGAGAAATAGC	chrX:7504625-7504665	TTCGTTTGATAACAACTCGA
chrX_C4	CGATTACCCGATAGGACGAAAGTTTGTAAGCTGCTTCCTTATAAGCATAAGGACGTGATATTCGTTTGATAACAACTCGA	CGATTACCCGATAGGACGAA	AGTTTGTAAGCTGCTTCCTTATAAGCATAAGGACGTGATA	chrX:7504667-7504707	TTCGTTTGATAACAACTCGA
chrX_C4	CGATTACCCGATAGGACGAAAGTCAGGTATTGTAATATGTGTGTATAATCTCCATTTGGGTTCGTTTGATAACAACTCGA	CGATTACCCGATAGGACGAA	AGTCAGGTATTGTAATATGTGTGTATAATCTCCATTTGGG	chrX:7504728-7504768	TTCGTTTGATAACAACTCGA
chrX_C4	CGATTACCCGATAGGACGAAAAGCAGAGACAGGCTCAGCGCACCCATACACATTACATACTTCGTTTGATAACAACTCGA	CGATTACCCGATAGGACGAA	AAGCAGAGACAGGCTCAGCGCACCCATACACATTACATAC	chrX:7504770-7504810	TTCGTTTGATAACAACTCGA
chrX_C4	CGATTACCCGATAGGACGAACCTGTTCAAAGTGATAGACACAGATTTTACTTAGTAACTGTTCGTTTGATAACAACTCGA	CGATTACCCGATAGGACGAA	CCTGTTCAAAGTGATAGACACAGATTTTACTTAGTAACTG	chrX:7504877-7504917	TTCGTTTGATAACAACTCGA
chrX_C4	CGATTACCCGATAGGACGAAAACAGAGAACGAGAAACCTTAGGTTAGAACTATGCTCAATTTCGTTTGATAACAACTCGA	CGATTACCCGATAGGACGAA	AACAGAGAACGAGAAACCTTAGGTTAGAACTATGCTCAAT	chrX:7504919-7504959	TTCGTTTGATAACAACTCGA
chrX_C4	CGATTACCCGATAGGACGAAAAATACAGCACTGGCAAATGGGGATCTCTACCTAAAAGGATTCGTTTGATAACAACTCGA	CGATTACCCGATAGGACGAA	AAATACAGCACTGGCAAATGGGGATCTCTACCTAAAAGGA	chrX:7504961-7505001	TTCGTTTGATAACAACTCGA
chrX_C4	CGATTACCCGATAGGACGAAATGAACACTGTAAATGATTAAAAGCTACTAGGGCGAGATGTTCGTTTGATAACAACTCGA	CGATTACCCGATAGGACGAA	ATGAACACTGTAAATGATTAAAAGCTACTAGGGCGAGATG	chrX:7505003-7505043	TTCGTTTGATAACAACTCGA
chrX_C4	CGATTACCCGATAGGACGAAGGGGTGGAAAAGTTTGGGAAGAGAACTCAGGAGCCTGGCTTTCGTTTGATAACAACTCGA	CGATTACCCGATAGGACGAA	GGGGTGGAAAAGTTTGGGAAGAGAACTCAGGAGCCTGGCT	chrX:7505143-7505183	TTCGTTTGATAACAACTCGA
chrX_C4	CGATTACCCGATAGGACGAACAGATTTATGCAAATGAAAGAATGATTTGAGGTGCTTTGGTTCGTTTGATAACAACTCGA	CGATTACCCGATAGGACGAA	CAGATTTATGCAAATGAAAGAATGATTTGAGGTGCTTTGG	chrX:7505190-7505230	TTCGTTTGATAACAACTCGA
chrX_C4	CGATTACCCGATAGGACGAATGCCTCCCGAGTGCTGGGATTAGTGAATGGAGGAATATTGTTCGTTTGATAACAACTCGA	CGATTACCCGATAGGACGAA	TGCCTCCCGAGTGCTGGGATTAGTGAATGGAGGAATATTG	chrX:7505351-7505391	TTCGTTTGATAACAACTCGA
chrX_C4	CGATTACCCGATAGGACGAAGTGCATGTCTACAAAACTGTTTCCACAAGTGTAAGAAAGTTTCGTTTGATAACAACTCGA	CGATTACCCGATAGGACGAA	GTGCATGTCTACAAAACTGTTTCCACAAGTGTAAGAAAGT	chrX:7505393-7505433	TTCGTTTGATAACAACTCGA
chrX_C4	CGATTACCCGATAGGACGAAAAGTCACCATGAGGACATAATTGATAGAACTATCACTTACTTCGTTTGATAACAACTCGA	CGATTACCCGATAGGACGAA	AAGTCACCATGAGGACATAATTGATAGAACTATCACTTAC	chrX:7505439-7505479	TTCGTTTGATAACAACTCGA
chrX_C4	CGATTACCCGATAGGACGAACCTTTAGAACTGACTTCAGTGTATTCCATTAGTTTGCTAAGCGTCTTGATTGGACATTCG	CGATTACCCGATAGGACGAA	CCTTTAGAACTGACTTCAGTGTATTCCATTAGTTTGCTAA	chrX:8503458-8503498	GCGTCTTGATTGGACATTCG
chrX_C4	CGATTACCCGATAGGACGAATTCTCTTTTGAATCAAGTAGTGGTTTGAATGACAATACCCGCGTCTTGATTGGACATTCG	CGATTACCCGATAGGACGAA	TTCTCTTTTGAATCAAGTAGTGGTTTGAATGACAATACCC	chrX:8503547-8503587	GCGTCTTGATTGGACATTCG
chrX_C4	CGATTACCCGATAGGACGAAGCCCCACAGAACCATAGATTTGAATACAGATCACCAGGGAGCGTCTTGATTGGACATTCG	CGATTACCCGATAGGACGAA	GCCCCACAGAACCATAGATTTGAATACAGATCACCAGGGA	chrX:8503589-8503629	GCGTCTTGATTGGACATTCG
chrX_C4	CGATTACCCGATAGGACGAATGGAAGTACGATTTGAGGGTTCAAATGTCTACACCAGAACGCGTCTTGATTGGACATTCG	CGATTACCCGATAGGACGAA	TGGAAGTACGATTTGAGGGTTCAAATGTCTACACCAGAAC	chrX:8503685-8503725	GCGTCTTGATTGGACATTCG
chrX_C4	CGATTACCCGATAGGACGAATCTCAGCTAATTCTCTACCAATGTGCCTGTAGGCTTCCCTGCGTCTTGATTGGACATTCG	CGATTACCCGATAGGACGAA	TCTCAGCTAATTCTCTACCAATGTGCCTGTAGGCTTCCCT	chrX:8503951-8503991	GCGTCTTGATTGGACATTCG
chrX_C4	CGATTACCCGATAGGACGAAATGATGGTAATAGACTGACCCTCTGAATTAGCCCCTAATTGCGTCTTGATTGGACATTCG	CGATTACCCGATAGGACGAA	ATGATGGTAATAGACTGACCCTCTGAATTAGCCCCTAATT	chrX:8503993-8504033	GCGTCTTGATTGGACATTCG
chrX_C4	CGATTACCCGATAGGACGAAAGTGTTGTCTTGTTCATGGTGTTTGTCATAGTAATAGAACGCGTCTTGATTGGACATTCG	CGATTACCCGATAGGACGAA	AGTGTTGTCTTGTTCATGGTGTTTGTCATAGTAATAGAAC	chrX:8504050-8504090	GCGTCTTGATTGGACATTCG
chrX_C4	CGATTACCCGATAGGACGAAAAAGCTTGAATTTTGTGTTGGATACTCCAATTTGGATAGCGCGTCTTGATTGGACATTCG	CGATTACCCGATAGGACGAA	AAAGCTTGAATTTTGTGTTGGATACTCCAATTTGGATAGC	chrX:8504172-8504212	GCGTCTTGATTGGACATTCG
chrX_C4	CGATTACCCGATAGGACGAATGAGTCTAGCTCTCCTTGCCAGCCAAGATTGTTCCTGGAGGCGTCTTGATTGGACATTCG	CGATTACCCGATAGGACGAA	TGAGTCTAGCTCTCCTTGCCAGCCAAGATTGTTCCTGGAG	chrX:8504214-8504254	GCGTCTTGATTGGACATTCG
chrX_C4	CGATTACCCGATAGGACGAACATCCACATACACTGTGCCCGATGCAGGACACATTCTTATGCGTCTTGATTGGACATTCG	CGATTACCCGATAGGACGAA	CATCCACATACACTGTGCCCGATGCAGGACACATTCTTAT	chrX:8504256-8504296	GCGTCTTGATTGGACATTCG
chrX_C4	CGATTACCCGATAGGACGAACACAAACAGCACAGAAAGGCTAGGACAATGCAGAGAACATGCGTCTTGATTGGACATTCG	CGATTACCCGATAGGACGAA	CACAAACAGCACAGAAAGGCTAGGACAATGCAGAGAACAT	chrX:8504308-8504348	GCGTCTTGATTGGACATTCG
chrX_C4	CGATTACCCGATAGGACGAATCAGGGACTCATGTCTGCCCTCTAGAGGCTGAAAGAAACAGCGTCTTGATTGGACATTCG	CGATTACCCGATAGGACGAA	TCAGGGACTCATGTCTGCCCTCTAGAGGCTGAAAGAAACA	chrX:8504350-8504390	GCGTCTTGATTGGACATTCG
chrX_C4	CGATTACCCGATAGGACGAACTGACTCTCCAGAGAAGCCCCTGAGACAAACTGCACCCAGGCGTCTTGATTGGACATTCG	CGATTACCCGATAGGACGAA	CTGACTCTCCAGAGAAGCCCCTGAGACAAACTGCACCCAG	chrX:8504392-8504432	GCGTCTTGATTGGACATTCG
chrX_C4	CGATTACCCGATAGGACGAACCTGTGCTTTAGCCTCCAGAAACACCACCACACGTGCATCGCGTCTTGATTGGACATTCG	CGATTACCCGATAGGACGAA	CCTGTGCTTTAGCCTCCAGAAACACCACCACACGTGCATC	chrX:8504452-8504492	GCGTCTTGATTGGACATTCG
chrX_C4	CGATTACCCGATAGGACGAAATTGTCAGAATTATCACCATCTTCTGGAACAGTTTAACTGGCGTCTTGATTGGACATTCG	CGATTACCCGATAGGACGAA	ATTGTCAGAATTATCACCATCTTCTGGAACAGTTTAACTG	chrX:8504495-8504535	GCGTCTTGATTGGACATTCG
chrX_C4	CGATTACCCGATAGGACGAACCTGGAGGATAGAGTGTCCAAGGATCACCCACAACAGCCCGCGTCTTGATTGGACATTCG	CGATTACCCGATAGGACGAA	CCTGGAGGATAGAGTGTCCAAGGATCACCCACAACAGCCC	chrX:8504537-8504577	GCGTCTTGATTGGACATTCG
chrX_C4	CGATTACCCGATAGGACGAACTGAGAGCCTCGCTGCCCTGAGTCTCCTGTGCTCTCTGCCGCGTCTTGATTGGACATTCG	CGATTACCCGATAGGACGAA	CTGAGAGCCTCGCTGCCCTGAGTCTCCTGTGCTCTCTGCC	chrX:8504579-8504619	GCGTCTTGATTGGACATTCG
chrX_C4	CGATTACCCGATAGGACGAAACCATAGCTGCCTCTGCTGCCAAGATATATTAGCAAACTCGCGTCTTGATTGGACATTCG	CGATTACCCGATAGGACGAA	ACCATAGCTGCCTCTGCTGCCAAGATATATTAGCAAACTC	chrX:8504629-8504669	GCGTCTTGATTGGACATTCG
chrX_C4	CGATTACCCGATAGGACGAAGGGGAGGCTGGACAGAGGAAATGAGAAGAGGAGGAGAGAAGCGTCTTGATTGGACATTCG	CGATTACCCGATAGGACGAA	GGGGAGGCTGGACAGAGGAAATGAGAAGAGGAGGAGAGAA	chrX:8504702-8504742	GCGTCTTGATTGGACATTCG
chrX_C4	CGATTACCCGATAGGACGAAAAACCAGAGGGAAAATTAGAAGAATATCTGAGGTAATTCCGCGTCTTGATTGGACATTCG	CGATTACCCGATAGGACGAA	AAACCAGAGGGAAAATTAGAAGAATATCTGAGGTAATTCC	chrX:8504774-8504814	GCGTCTTGATTGGACATTCG
chrX_C4	CGATTACCCGATAGGACGAATTTTAGGAGACAGTAGAAAGATAATTGTGCTAACAGAGAGGCGTCTTGATTGGACATTCG	CGATTACCCGATAGGACGAA	TTTTAGGAGACAGTAGAAAGATAATTGTGCTAACAGAGAG	chrX:8504844-8504884	GCGTCTTGATTGGACATTCG
chrX_C4	CGATTACCCGATAGGACGAACAGCGGAAGCTGAGCTTAGCAGATATACTATAACCCTGGTGCGTCTTGATTGGACATTCG	CGATTACCCGATAGGACGAA	CAGCGGAAGCTGAGCTTAGCAGATATACTATAACCCTGGT	chrX:8504909-8504949	GCGTCTTGATTGGACATTCG
chrX_C4	CGATTACCCGATAGGACGAAGCGTTTGGAGCTGCTAGTTTTGAGGAAAGTGGGAGAAGGGGCGTCTTGATTGGACATTCG	CGATTACCCGATAGGACGAA	GCGTTTGGAGCTGCTAGTTTTGAGGAAAGTGGGAGAAGGG	chrX:8504951-8504991	GCGTCTTGATTGGACATTCG
chrX_C4	CGATTACCCGATAGGACGAACTTACTTCACATCTTTGAGGCTCATGGCACTACATGGGTCGCGTCTTGATTGGACATTCG	CGATTACCCGATAGGACGAA	CTTACTTCACATCTTTGAGGCTCATGGCACTACATGGGTC	chrX:8505195-8505235	GCGTCTTGATTGGACATTCG
chrX_C4	CGATTACCCGATAGGACGAATTGCCTTGCAATTTGGCTAGAATCATGCAACTGCTCCCACGCGTCTTGATTGGACATTCG	CGATTACCCGATAGGACGAA	TTGCCTTGCAATTTGGCTAGAATCATGCAACTGCTCCCAC	chrX:8505260-8505300	GCGTCTTGATTGGACATTCG
chrX_C4	CGATTACCCGATAGGACGAACCAAGTTGCCTTCCTTAGCTTGCTCTGGGCTGTTTGCTTCGCGTCTTGATTGGACATTCG	CGATTACCCGATAGGACGAA	CCAAGTTGCCTTCCTTAGCTTGCTCTGGGCTGTTTGCTTC	chrX:8505304-8505344	GCGTCTTGATTGGACATTCG
chrX_C4	CGATTACCCGATAGGACGAAGTCCCTGTAGGCTCATAGATTTGGATGCTCAGTGACTAATGCGTCTTGATTGGACATTCG	CGATTACCCGATAGGACGAA	GTCCCTGTAGGCTCATAGATTTGGATGCTCAGTGACTAAT	chrX:8505371-8505411	GCGTCTTGATTGGACATTCG
chrX_C4	CGATTACCCGATAGGACGAAAGAGGGATTGAGTAGTATGACCTTATTAGAGTTCATGTGTGCGTCTTGATTGGACATTCG	CGATTACCCGATAGGACGAA	AGAGGGATTGAGTAGTATGACCTTATTAGAGTTCATGTGT	chrX:8505413-8505453	GCGTCTTGATTGGACATTCG
chrX_C4	CGATTACCCGATAGGACGAAGTTCAGTGTCCAGCAGTCTCTGTCTTTCTCCTCTCTCTCTGCGTCTTGATTGGACATTCG	CGATTACCCGATAGGACGAA	GTTCAGTGTCCAGCAGTCTCTGTCTTTCTCCTCTCTCTCT	chrX:8505486-8505526	GCGTCTTGATTGGACATTCG
chrX_C4	CGATTACCCGATAGGACGAATCTCCCTCTCCTTCTACCACTCTACCTATGGATCAAGATGGCGTCTTGATTGGACATTCG	CGATTACCCGATAGGACGAA	TCTCCCTCTCCTTCTACCACTCTACCTATGGATCAAGATG	chrX:8505528-8505568	GCGTCTTGATTGGACATTCG
chrX_C4	CGATTACCCGATAGGACGAATTTTCTCTAGCTGCTATATCTGACTGTGTCCTACCATGTTGCGTCTTGATTGGACATTCG	CGATTACCCGATAGGACGAA	TTTTCTCTAGCTGCTATATCTGACTGTGTCCTACCATGTT	chrX:8505582-8505622	GCGTCTTGATTGGACATTCG
chrX_C4	CGATTACCCGATAGGACGAACATGGTGTCTCTTCACAATGACAGAAACTAACACAGCCACGCGTCTTGATTGGACATTCG	CGATTACCCGATAGGACGAA	CATGGTGTCTCTTCACAATGACAGAAACTAACACAGCCAC	chrX:8505707-8505747	GCGTCTTGATTGGACATTCG
chrX_C4	CGATTACCCGATAGGACGAACAATTTTAAGAAGATGTGACATTATGCCTTTGTGTAGTGGGCGTCTTGATTGGACATTCG	CGATTACCCGATAGGACGAA	CAATTTTAAGAAGATGTGACATTATGCCTTTGTGTAGTGG	chrX:8505830-8505870	GCGTCTTGATTGGACATTCG
chrX_C4	CGATTACCCGATAGGACGAACCCCAAGATCTGGCTTCTCAAAATCAGGAGATCCTCACGTGCGTCTTGATTGGACATTCG	CGATTACCCGATAGGACGAA	CCCCAAGATCTGGCTTCTCAAAATCAGGAGATCCTCACGT	chrX:8505911-8505951	GCGTCTTGATTGGACATTCG
chrX_C4	CGATTACCCGATAGGACGAATGTTTGCTTAATGAAGATGCCTGAGGCCTGAGCTGGACATGCGTCTTGATTGGACATTCG	CGATTACCCGATAGGACGAA	TGTTTGCTTAATGAAGATGCCTGAGGCCTGAGCTGGACAT	chrX:8505995-8506035	GCGTCTTGATTGGACATTCG
chrX_C4	CGATTACCCGATAGGACGAACATGAAGTCTCAGTCGGAGACCATGAGGATAGAATAAAGAGCGTCTTGATTGGACATTCG	CGATTACCCGATAGGACGAA	CATGAAGTCTCAGTCGGAGACCATGAGGATAGAATAAAGA	chrX:8506064-8506104	GCGTCTTGATTGGACATTCG
chrX_C4	CGATTACCCGATAGGACGAAAACACAGGGGAGGGGTTGTGAGCCACCATAGAGAATGTAGGCGTCTTGATTGGACATTCG	CGATTACCCGATAGGACGAA	AACACAGGGGAGGGGTTGTGAGCCACCATAGAGAATGTAG	chrX:8506106-8506146	GCGTCTTGATTGGACATTCG
chrX_C4	CGATTACCCGATAGGACGAACCTGATTGTATGGACATGAGGTTGGCCAATAGGAATAGGAGCGTCTTGATTGGACATTCG	CGATTACCCGATAGGACGAA	CCTGATTGTATGGACATGAGGTTGGCCAATAGGAATAGGA	chrX:8506148-8506188	GCGTCTTGATTGGACATTCG
chrX_C4	CGATTACCCGATAGGACGAAGGCCCATGTGGAACACGGCAAGTGTTTTAGTTAGAATTTTGCGTCTTGATTGGACATTCG	CGATTACCCGATAGGACGAA	GGCCCATGTGGAACACGGCAAGTGTTTTAGTTAGAATTTT	chrX:8506190-8506230	GCGTCTTGATTGGACATTCG
chrX_C4	CGATTACCCGATAGGACGAAGGGGTCTTATCTTTCTTGTCACCCGCTGCTCTGCCTAAACGCGTCTTGATTGGACATTCG	CGATTACCCGATAGGACGAA	GGGGTCTTATCTTTCTTGTCACCCGCTGCTCTGCCTAAAC	chrX:8506439-8506479	GCGTCTTGATTGGACATTCG
chrX_C4	CGATTACCCGATAGGACGAAGCTCCATTCTACTTCCTGGTGCCACTTTAATTGGACTCTTGCGTCTTGATTGGACATTCG	CGATTACCCGATAGGACGAA	GCTCCATTCTACTTCCTGGTGCCACTTTAATTGGACTCTT	chrX:8506629-8506669	GCGTCTTGATTGGACATTCG
chrX_C4	CGATTACCCGATAGGACGAACAAGAGAGAACTTTAGTAATCACACAACAGAATATACACCGCGTCTTGATTGGACATTCG	CGATTACCCGATAGGACGAA	CAAGAGAGAACTTTAGTAATCACACAACAGAATATACACC	chrX:8506730-8506770	GCGTCTTGATTGGACATTCG
chrX_C4	CGATTACCCGATAGGACGAAATTAAGCTAAATTTCTTCACCTTAGTGTCAGGACAGACTGGCGTCTTGATTGGACATTCG	CGATTACCCGATAGGACGAA	ATTAAGCTAAATTTCTTCACCTTAGTGTCAGGACAGACTG	chrX:8506801-8506841	GCGTCTTGATTGGACATTCG
chrX_C4	CGATTACCCGATAGGACGAAGGCCCGTCCTCACAGTTCAAACCACTCACAGCAGCATAGTGCGTCTTGATTGGACATTCG	CGATTACCCGATAGGACGAA	GGCCCGTCCTCACAGTTCAAACCACTCACAGCAGCATAGT	chrX:8506940-8506980	GCGTCTTGATTGGACATTCG
chrX_C4	CGATTACCCGATAGGACGAAACTGGCTTCCAGGCAGTCTTAAAACGCATGCCCACAGTGAGCGTCTTGATTGGACATTCG	CGATTACCCGATAGGACGAA	ACTGGCTTCCAGGCAGTCTTAAAACGCATGCCCACAGTGA	chrX:8507329-8507369	GCGTCTTGATTGGACATTCG
chrX_C4	CGATTACCCGATAGGACGAAGATCACACCTACTCCAACAGAGTCACACCCTACAGGATTCGCGTCTTGATTGGACATTCG	CGATTACCCGATAGGACGAA	GATCACACCTACTCCAACAGAGTCACACCCTACAGGATTC	chrX:8507386-8507426	GCGTCTTGATTGGACATTCG
chrX_C4	CGATTACCCGATAGGACGAATATACATATCCTCATGCTGCACCTAAGAAGATCTGGAATTGCGTCTTGATTGGACATTCG	CGATTACCCGATAGGACGAA	TATACATATCCTCATGCTGCACCTAAGAAGATCTGGAATT	chrX:8507428-8507468	GCGTCTTGATTGGACATTCG
chrX_C4	CGATTACCCGATAGGACGAAGGCTAGCCTGGGCTACATAGCAAGAAGCCATACTTAGCAAGCGTCTTGATTGGACATTCG	CGATTACCCGATAGGACGAA	GGCTAGCCTGGGCTACATAGCAAGAAGCCATACTTAGCAA	chrX:8507471-8507511	GCGTCTTGATTGGACATTCG
chrX_C4	CGATTACCCGATAGGACGAACCTACTCCAACAGAGTCACACCATAGAGGTTCTATATCCAGCGTCTTGATTGGACATTCG	CGATTACCCGATAGGACGAA	CCTACTCCAACAGAGTCACACCATAGAGGTTCTATATCCA	chrX:8507554-8507594	GCGTCTTGATTGGACATTCG
chrX_C4	CGATTACCCGATAGGACGAAATGTTGTCCAGTACAGAAATATACCTGATCATTTACAAGGGCGTCTTGATTGGACATTCG	CGATTACCCGATAGGACGAA	ATGTTGTCCAGTACAGAAATATACCTGATCATTTACAAGG	chrX:8507683-8507723	GCGTCTTGATTGGACATTCG
chrX_C4	CGATTACCCGATAGGACGAAAAACTAGCACATCTGTGGAACTGTGGGGTTATTTACCTTTGCGTCTTGATTGGACATTCG	CGATTACCCGATAGGACGAA	AAACTAGCACATCTGTGGAACTGTGGGGTTATTTACCTTT	chrX:8507725-8507765	GCGTCTTGATTGGACATTCG
chrX_C4	CGATTACCCGATAGGACGAAAAAAGAAGTAGCTCTAAGCTGAGACAATATGATGTACCATGCGTCTTGATTGGACATTCG	CGATTACCCGATAGGACGAA	AAAAGAAGTAGCTCTAAGCTGAGACAATATGATGTACCAT	chrX:8508201-8508241	GCGTCTTGATTGGACATTCG
chrX_C4	CGATTACCCGATAGGACGAATGTTTTAGTGAGTAACTTATCTTGTATGAAATGCACTCGGGCGTCTTGATTGGACATTCG	CGATTACCCGATAGGACGAA	TGTTTTAGTGAGTAACTTATCTTGTATGAAATGCACTCGG	chrX:8508774-8508814	GCGTCTTGATTGGACATTCG
chrX_C4	CGATTACCCGATAGGACGAATTTATTGTCATCATCAGTGAATGTTTATGCTACCACCATCGCGTCTTGATTGGACATTCG	CGATTACCCGATAGGACGAA	TTTATTGTCATCATCAGTGAATGTTTATGCTACCACCATC	chrX:8508968-8509008	GCGTCTTGATTGGACATTCG
chrX_C4	CGATTACCCGATAGGACGAACTCTTGACATTTGGCCCTACTTGCCACACTTAGGATGCTGGCGTCTTGATTGGACATTCG	CGATTACCCGATAGGACGAA	CTCTTGACATTTGGCCCTACTTGCCACACTTAGGATGCTG	chrX:8509010-8509050	GCGTCTTGATTGGACATTCG
chrX_C4	CGATTACCCGATAGGACGAATATTTGCTGATAACTAATGGACACTGCTAAACCTGCTAAGGCGTCTTGATTGGACATTCG	CGATTACCCGATAGGACGAA	TATTTGCTGATAACTAATGGACACTGCTAAACCTGCTAAG	chrX:8509052-8509092	GCGTCTTGATTGGACATTCG
chrX_C4	CGATTACCCGATAGGACGAAGGACCATGCTAAAATGCACAAATAGCTTCTCACTAAAAGGGCGTCTTGATTGGACATTCG	CGATTACCCGATAGGACGAA	GGACCATGCTAAAATGCACAAATAGCTTCTCACTAAAAGG	chrX:8509098-8509138	GCGTCTTGATTGGACATTCG
chrX_C4	CGATTACCCGATAGGACGAAACACCAGCTATAACCCAGAGCTTCAGAAATACTGTCTTAGGCGTCTTGATTGGACATTCG	CGATTACCCGATAGGACGAA	ACACCAGCTATAACCCAGAGCTTCAGAAATACTGTCTTAG	chrX:8509140-8509180	GCGTCTTGATTGGACATTCG
chrX_C4	CGATTACCCGATAGGACGAAGTAGGTATATCTACATATATACTCCGCTAATACGTGGATTGCGTCTTGATTGGACATTCG	CGATTACCCGATAGGACGAA	GTAGGTATATCTACATATATACTCCGCTAATACGTGGATT	chrX:8509182-8509222	GCGTCTTGATTGGACATTCG
chrX_C4	CGATTACCCGATAGGACGAATAAATTTCACCTGTTAACATCCCCTGTAATACCTCTAATCGCGTCTTGATTGGACATTCG	CGATTACCCGATAGGACGAA	TAAATTTCACCTGTTAACATCCCCTGTAATACCTCTAATC	chrX:8509269-8509309	GCGTCTTGATTGGACATTCG
chrX_C4	CGATTACCCGATAGGACGAATATTTGTACCCTATTCATTATGTTTGGTCTCTCTCATTCCGCGTCTTGATTGGACATTCG	CGATTACCCGATAGGACGAA	TATTTGTACCCTATTCATTATGTTTGGTCTCTCTCATTCC	chrX:8509328-8509368	GCGTCTTGATTGGACATTCG
chrX_C4	CGATTACCCGATAGGACGAAGAGACACTAAACTTTGGGTCACAGTGAGACTACCAGCTGCGCGTCTTGATTGGACATTCG	CGATTACCCGATAGGACGAA	GAGACACTAAACTTTGGGTCACAGTGAGACTACCAGCTGC	chrX:8509370-8509410	GCGTCTTGATTGGACATTCG
chrX_C4	CGATTACCCGATAGGACGAAAAAGTGGTGACTTAGAACCAGATTCTCCATGCTAGGAGATGCGTCTTGATTGGACATTCG	CGATTACCCGATAGGACGAA	AAAGTGGTGACTTAGAACCAGATTCTCCATGCTAGGAGAT	chrX:8509443-8509483	GCGTCTTGATTGGACATTCG
chrX_C4	CGATTACCCGATAGGACGAAGGGGTGGTCCAGACACTCTAAGAGTTAGAAGTGAAGAGCGGCGTCTTGATTGGACATTCG	CGATTACCCGATAGGACGAA	GGGGTGGTCCAGACACTCTAAGAGTTAGAAGTGAAGAGCG	chrX:8509505-8509545	GCGTCTTGATTGGACATTCG
chrX_C4	CGATTACCCGATAGGACGAAATCTGAAGATGAGAGGAACGAAGAGCCCAATTTACCACTTGCGTCTTGATTGGACATTCG	CGATTACCCGATAGGACGAA	ATCTGAAGATGAGAGGAACGAAGAGCCCAATTTACCACTT	chrX:8509557-8509597	GCGTCTTGATTGGACATTCG
chrX_C4	CGATTACCCGATAGGACGAAACTCAGCATGCAGTAGCTGTGCTTTTCATCTTCTTGTACTGCGTCTTGATTGGACATTCG	CGATTACCCGATAGGACGAA	ACTCAGCATGCAGTAGCTGTGCTTTTCATCTTCTTGTACT	chrX:8509603-8509643	GCGTCTTGATTGGACATTCG
chrX_C4	CGATTACCCGATAGGACGAACAGTACAAGGAGCCATAAGCTGAGGTGAGAGCTCAGCACCGCGTCTTGATTGGACATTCG	CGATTACCCGATAGGACGAA	CAGTACAAGGAGCCATAAGCTGAGGTGAGAGCTCAGCACC	chrX:8509645-8509685	GCGTCTTGATTGGACATTCG
chrX_C4	CGATTACCCGATAGGACGAACTCCAGTTCAGCAAGCACAGAACCCTTTAAGGCCTGCATCGCGTCTTGATTGGACATTCG	CGATTACCCGATAGGACGAA	CTCCAGTTCAGCAAGCACAGAACCCTTTAAGGCCTGCATC	chrX:8509747-8509787	GCGTCTTGATTGGACATTCG
chrX_C4	CGATTACCCGATAGGACGAACCAGATTCAGTGTCTTTTCTGGGTGGATGTGTACCTACTAGCGTCTTGATTGGACATTCG	CGATTACCCGATAGGACGAA	CCAGATTCAGTGTCTTTTCTGGGTGGATGTGTACCTACTA	chrX:8509792-8509832	GCGTCTTGATTGGACATTCG
chrX_C4	CGATTACCCGATAGGACGAATATACTCTAGGAAGCAAAATTCAGGTGCAAACACAGCTTGGCGTCTTGATTGGACATTCG	CGATTACCCGATAGGACGAA	TATACTCTAGGAAGCAAAATTCAGGTGCAAACACAGCTTG	chrX:8509834-8509874	GCGTCTTGATTGGACATTCG
chrX_C4	CGATTACCCGATAGGACGAATGAATAACTTGCATACAGAACTTCCAAATGTCTCAGTTGAGCGTCTTGATTGGACATTCG	CGATTACCCGATAGGACGAA	TGAATAACTTGCATACAGAACTTCCAAATGTCTCAGTTGA	chrX:8509879-8509919	GCGTCTTGATTGGACATTCG
chrX_C4	CGATTACCCGATAGGACGAAGAAGAACGCTTAAATATGCATAAATGAATTGAGCTATGGGGCGTCTTGATTGGACATTCG	CGATTACCCGATAGGACGAA	GAAGAACGCTTAAATATGCATAAATGAATTGAGCTATGGG	chrX:8510040-8510080	GCGTCTTGATTGGACATTCG
chrX_C4	CGATTACCCGATAGGACGAAGTAGCCTTCCATTTAGCATGACTGTAAATCAAAATGCTTAGCGTCTTGATTGGACATTCG	CGATTACCCGATAGGACGAA	GTAGCCTTCCATTTAGCATGACTGTAAATCAAAATGCTTA	chrX:8510082-8510122	GCGTCTTGATTGGACATTCG
chrX_C4	CGATTACCCGATAGGACGAACATCCCACATTCCTCTGAGCATGCTACTGCAGCTGGAAAAGCGTCTTGATTGGACATTCG	CGATTACCCGATAGGACGAA	CATCCCACATTCCTCTGAGCATGCTACTGCAGCTGGAAAA	chrX:8510155-8510195	GCGTCTTGATTGGACATTCG
chrX_C4	CGATTACCCGATAGGACGAATTAGTCCTCCAGTATTAGCATTTGCCTTGGGCTTGATCTTGCGTCTTGATTGGACATTCG	CGATTACCCGATAGGACGAA	TTAGTCCTCCAGTATTAGCATTTGCCTTGGGCTTGATCTT	chrX:8510197-8510237	GCGTCTTGATTGGACATTCG
chrX_C4	CGATTACCCGATAGGACGAAGTATGTGACATGTGTGATTGTTCTGATGGCCATTCAGTGAGCGTCTTGATTGGACATTCG	CGATTACCCGATAGGACGAA	GTATGTGACATGTGTGATTGTTCTGATGGCCATTCAGTGA	chrX:8510239-8510279	GCGTCTTGATTGGACATTCG
chrX_C4	CGATTACCCGATAGGACGAAGTTAGTGAGACAGATGACACAGTAGGGACACTTCTAGAGAGCGTCTTGATTGGACATTCG	CGATTACCCGATAGGACGAA	GTTAGTGAGACAGATGACACAGTAGGGACACTTCTAGAGA	chrX:8510281-8510321	GCGTCTTGATTGGACATTCG
chrX_C4	CGATTACCCGATAGGACGAAGACAAGAGCAGCCAGCTTCAAACTTCCATTCATGACTCCCGCGTCTTGATTGGACATTCG	CGATTACCCGATAGGACGAA	GACAAGAGCAGCCAGCTTCAAACTTCCATTCATGACTCCC	chrX:8510323-8510363	GCGTCTTGATTGGACATTCG
chrX_C4	CGATTACCCGATAGGACGAATTTTCCTCCAACAGAGCACCACTGATTCTGCTTCAAAAGTGCGTCTTGATTGGACATTCG	CGATTACCCGATAGGACGAA	TTTTCCTCCAACAGAGCACCACTGATTCTGCTTCAAAAGT	chrX:8510386-8510426	GCGTCTTGATTGGACATTCG
chrX_C4	CGATTACCCGATAGGACGAAACTATTTTCTCTTCCCATTTCATCCTCAAGAATCTATTCCGCGTCTTGATTGGACATTCG	CGATTACCCGATAGGACGAA	ACTATTTTCTCTTCCCATTTCATCCTCAAGAATCTATTCC	chrX:8510428-8510468	GCGTCTTGATTGGACATTCG
chrX_C4	CGATTACCCGATAGGACGAATGATGTTTTGAGGCAGCATATAAAGTAATGGGTTTCATGAGCGTCTTGATTGGACATTCG	CGATTACCCGATAGGACGAA	TGATGTTTTGAGGCAGCATATAAAGTAATGGGTTTCATGA	chrX:8510470-8510510	GCGTCTTGATTGGACATTCG
chrX_C4	CGATTACCCGATAGGACGAACCCCTATCCCCATATTGCTAATACCCTTCTTTCTCACTGAGCGTCTTGATTGGACATTCG	CGATTACCCGATAGGACGAA	CCCCTATCCCCATATTGCTAATACCCTTCTTTCTCACTGA	chrX:8510536-8510576	GCGTCTTGATTGGACATTCG
chrX_C4	CGATTACCCGATAGGACGAACCTGTTACTACTTTCCTGGCCCCTGTGCACAAAGTTACTCGCGTCTTGATTGGACATTCG	CGATTACCCGATAGGACGAA	CCTGTTACTACTTTCCTGGCCCCTGTGCACAAAGTTACTC	chrX:8510581-8510621	GCGTCTTGATTGGACATTCG
chrX_C4	CGATTACCCGATAGGACGAATGTACCTCTTTAAGGGCTCCACCTCCCATTTATGATACCCGCGTCTTGATTGGACATTCG	CGATTACCCGATAGGACGAA	TGTACCTCTTTAAGGGCTCCACCTCCCATTTATGATACCC	chrX:8510623-8510663	GCGTCTTGATTGGACATTCG
chrX_C4	CGATTACCCGATAGGACGAATCCAATTTCATGCCCCACCAAATACAAAATTACACAAGACGCGTCTTGATTGGACATTCG	CGATTACCCGATAGGACGAA	TCCAATTTCATGCCCCACCAAATACAAAATTACACAAGAC	chrX:8510665-8510705	GCGTCTTGATTGGACATTCG
chrX_C4	CGATTACCCGATAGGACGAAAATTTAAACATGGTTACTCATTTGAAGTTAACCGGGAACCGCGTCTTGATTGGACATTCG	CGATTACCCGATAGGACGAA	AATTTAAACATGGTTACTCATTTGAAGTTAACCGGGAACC	chrX:8510708-8510748	GCGTCTTGATTGGACATTCG
chrX_C4	CGATTACCCGATAGGACGAATTGTTTTGTTGAACACATACATTTATCAGCGCCTCTGAACGCGTCTTGATTGGACATTCG	CGATTACCCGATAGGACGAA	TTGTTTTGTTGAACACATACATTTATCAGCGCCTCTGAAC	chrX:8510767-8510807	GCGTCTTGATTGGACATTCG
chrX_C4	CGATTACCCGATAGGACGAACTCTGCATCCTCACATAGTGCTGAAGCAGAGGCCTCTTGTGCGTCTTGATTGGACATTCG	CGATTACCCGATAGGACGAA	CTCTGCATCCTCACATAGTGCTGAAGCAGAGGCCTCTTGT	chrX:8510810-8510850	GCGTCTTGATTGGACATTCG
chrX_C4	CGATTACCCGATAGGACGAACTTGTCTCTTCCCTCTCTACAGTTCTGTTCATCAGAGCCAGCGTCTTGATTGGACATTCG	CGATTACCCGATAGGACGAA	CTTGTCTCTTCCCTCTCTACAGTTCTGTTCATCAGAGCCA	chrX:8510852-8510892	GCGTCTTGATTGGACATTCG
chrX_C4	CGATTACCCGATAGGACGAATGCATAGCAACACACATTACCTCCATCATCCCTAGGAGAGGCGTCTTGATTGGACATTCG	CGATTACCCGATAGGACGAA	TGCATAGCAACACACATTACCTCCATCATCCCTAGGAGAG	chrX:8510894-8510934	GCGTCTTGATTGGACATTCG
chrX_C4	CGATTACCCGATAGGACGAAGACATTATGGCTCCTACATATGAGTGCTATGTGAAATGGAGCGTCTTGATTGGACATTCG	CGATTACCCGATAGGACGAA	GACATTATGGCTCCTACATATGAGTGCTATGTGAAATGGA	chrX:8510942-8510982	GCGTCTTGATTGGACATTCG
chrX_C4	CGATTACCCGATAGGACGAATATGACATAGCTCACCTCATAGCATTGACCATGGAACACCGCGTCTTGATTGGACATTCG	CGATTACCCGATAGGACGAA	TATGACATAGCTCACCTCATAGCATTGACCATGGAACACC	chrX:8510984-8511024	GCGTCTTGATTGGACATTCG
chrX_C4	CGATTACCCGATAGGACGAAATAATTCTAGACCTGCCAGAAAACTTTATCATACCAACACGCGTCTTGATTGGACATTCG	CGATTACCCGATAGGACGAA	ATAATTCTAGACCTGCCAGAAAACTTTATCATACCAACAC	chrX:8511028-8511068	GCGTCTTGATTGGACATTCG
chrX_C4	CGATTACCCGATAGGACGAAGTTATGTGTCCCTTGCCTGAAGTTGTCCTGAACCCTAGGTGCGTCTTGATTGGACATTCG	CGATTACCCGATAGGACGAA	GTTATGTGTCCCTTGCCTGAAGTTGTCCTGAACCCTAGGT	chrX:8511070-8511110	GCGTCTTGATTGGACATTCG
chrX_C4	CGATTACCCGATAGGACGAAGTCCTTCAGATATAAGCCTTAATTCTTGTATTCCATAAGCGCGTCTTGATTGGACATTCG	CGATTACCCGATAGGACGAA	GTCCTTCAGATATAAGCCTTAATTCTTGTATTCCATAAGC	chrX:8511128-8511168	GCGTCTTGATTGGACATTCG
chrX_C4	CGATTACCCGATAGGACGAATTCTACCTTTGCTGCCATTAGGCTCTGATTTTGGACTTGGGCGTCTTGATTGGACATTCG	CGATTACCCGATAGGACGAA	TTCTACCTTTGCTGCCATTAGGCTCTGATTTTGGACTTGG	chrX:8511170-8511210	GCGTCTTGATTGGACATTCG
chrX_C4	CGATTACCCGATAGGACGAACCTGCCCAATAAATGCATTTAAATAGAGTGCAATAAAGGTCCGATGGTTTTACAGATCGA	CGATTACCCGATAGGACGAA	CCTGCCCAATAAATGCATTTAAATAGAGTGCAATAAAGGT	chrX:9464496-9464536	CCGATGGTTTTACAGATCGA
chrX_C4	CGATTACCCGATAGGACGAATTTTGAGAATCAGATTTTCTCACCACACCCATGCTATCTTCCGATGGTTTTACAGATCGA	CGATTACCCGATAGGACGAA	TTTTGAGAATCAGATTTTCTCACCACACCCATGCTATCTT	chrX:9464567-9464607	CCGATGGTTTTACAGATCGA
chrX_C4	CGATTACCCGATAGGACGAACTATTTTATCAGCAAATTCTAGGTGTTGATGAATCCTCACCCGATGGTTTTACAGATCGA	CGATTACCCGATAGGACGAA	CTATTTTATCAGCAAATTCTAGGTGTTGATGAATCCTCAC	chrX:9464628-9464668	CCGATGGTTTTACAGATCGA
chrX_C4	CGATTACCCGATAGGACGAAGCCCATTGTCAGGATACCTTCTCTCCAATACTTTCTTTTACCGATGGTTTTACAGATCGA	CGATTACCCGATAGGACGAA	GCCCATTGTCAGGATACCTTCTCTCCAATACTTTCTTTTA	chrX:9464670-9464710	CCGATGGTTTTACAGATCGA
chrX_C4	CGATTACCCGATAGGACGAAGGACACACCATATTTTGCTCTGTGCCATATTTATTTGAACCCGATGGTTTTACAGATCGA	CGATTACCCGATAGGACGAA	GGACACACCATATTTTGCTCTGTGCCATATTTATTTGAAC	chrX:9464712-9464752	CCGATGGTTTTACAGATCGA
chrX_C4	CGATTACCCGATAGGACGAATATACAGAATCCTACAGCTTGAAAATACTTCCTGTACATCCCGATGGTTTTACAGATCGA	CGATTACCCGATAGGACGAA	TATACAGAATCCTACAGCTTGAAAATACTTCCTGTACATC	chrX:9464822-9464862	CCGATGGTTTTACAGATCGA
chrX_C4	CGATTACCCGATAGGACGAATGCACCACTTTAATGCCCATTAGAGTGTTTATATGAAGGCCCGATGGTTTTACAGATCGA	CGATTACCCGATAGGACGAA	TGCACCACTTTAATGCCCATTAGAGTGTTTATATGAAGGC	chrX:9464864-9464904	CCGATGGTTTTACAGATCGA
chrX_C4	CGATTACCCGATAGGACGAAAAGGGACTCTGGGCACGTAGAAAGCTCTGAAATCTCTAATCCGATGGTTTTACAGATCGA	CGATTACCCGATAGGACGAA	AAGGGACTCTGGGCACGTAGAAAGCTCTGAAATCTCTAAT	chrX:9464906-9464946	CCGATGGTTTTACAGATCGA
chrX_C4	CGATTACCCGATAGGACGAAACTCACTATGTAGGTTGGGGTGGTTCCAAACATACATAAGCCGATGGTTTTACAGATCGA	CGATTACCCGATAGGACGAA	ACTCACTATGTAGGTTGGGGTGGTTCCAAACATACATAAG	chrX:9465050-9465090	CCGATGGTTTTACAGATCGA
chrX_C4	CGATTACCCGATAGGACGAAGGAATTATAGGCATGTGCCAATATAGGAGTAAACTATTCCCCGATGGTTTTACAGATCGA	CGATTACCCGATAGGACGAA	GGAATTATAGGCATGTGCCAATATAGGAGTAAACTATTCC	chrX:9465118-9465158	CCGATGGTTTTACAGATCGA
chrX_C4	CGATTACCCGATAGGACGAAACATTCTTGAACTCTTAGTTCCTAAATGTCATATGTCTGGCCGATGGTTTTACAGATCGA	CGATTACCCGATAGGACGAA	ACATTCTTGAACTCTTAGTTCCTAAATGTCATATGTCTGG	chrX:9465258-9465298	CCGATGGTTTTACAGATCGA
chrX_C4	CGATTACCCGATAGGACGAACATAAACCCCTACGCATGCATATTTACTTCATTACTATTGCCGATGGTTTTACAGATCGA	CGATTACCCGATAGGACGAA	CATAAACCCCTACGCATGCATATTTACTTCATTACTATTG	chrX:9465300-9465340	CCGATGGTTTTACAGATCGA
chrX_C4	CGATTACCCGATAGGACGAATAAGTTTCCAAGTTAAATGATATTCCAGGAACTTTTGCCCCCGATGGTTTTACAGATCGA	CGATTACCCGATAGGACGAA	TAAGTTTCCAAGTTAAATGATATTCCAGGAACTTTTGCCC	chrX:9465368-9465408	CCGATGGTTTTACAGATCGA
chrX_C4	CGATTACCCGATAGGACGAATGTATGTATAAGTAGATGGTGATGCAGATGTACATGACGTCCGATGGTTTTACAGATCGA	CGATTACCCGATAGGACGAA	TGTATGTATAAGTAGATGGTGATGCAGATGTACATGACGT	chrX:9465459-9465499	CCGATGGTTTTACAGATCGA
chrX_C4	CGATTACCCGATAGGACGAAATCACAGCATGTGACGTGACATAGCTCATGAATATTCTACCCGATGGTTTTACAGATCGA	CGATTACCCGATAGGACGAA	ATCACAGCATGTGACGTGACATAGCTCATGAATATTCTAC	chrX:9465501-9465541	CCGATGGTTTTACAGATCGA
chrX_C4	CGATTACCCGATAGGACGAAAAGATGAGCTTTACAGAGCATTGCTTGGCTCTTCCTTGGACCGATGGTTTTACAGATCGA	CGATTACCCGATAGGACGAA	AAGATGAGCTTTACAGAGCATTGCTTGGCTCTTCCTTGGA	chrX:9465543-9465583	CCGATGGTTTTACAGATCGA
chrX_C4	CGATTACCCGATAGGACGAAGAGCATTTGGTGTGATGGTCAACAATGTGAAGCAGTAGACCCGATGGTTTTACAGATCGA	CGATTACCCGATAGGACGAA	GAGCATTTGGTGTGATGGTCAACAATGTGAAGCAGTAGAC	chrX:9465585-9465625	CCGATGGTTTTACAGATCGA
chrX_C4	CGATTACCCGATAGGACGAAAGTGTTTGCTCTTACCGCACTGGAACCCCTGAGAAAGGAGCCGATGGTTTTACAGATCGA	CGATTACCCGATAGGACGAA	AGTGTTTGCTCTTACCGCACTGGAACCCCTGAGAAAGGAG	chrX:9465627-9465667	CCGATGGTTTTACAGATCGA
chrX_C4	CGATTACCCGATAGGACGAACAGATTTCGACACACTGGCAGCAGGATCAGCATACAGTTGCCGATGGTTTTACAGATCGA	CGATTACCCGATAGGACGAA	CAGATTTCGACACACTGGCAGCAGGATCAGCATACAGTTG	chrX:9465669-9465709	CCGATGGTTTTACAGATCGA
chrX_C4	CGATTACCCGATAGGACGAAATTCAGGCAGGCTGCAGGTGCCCGGGCCAGAGCCAGTGCTCCGATGGTTTTACAGATCGA	CGATTACCCGATAGGACGAA	ATTCAGGCAGGCTGCAGGTGCCCGGGCCAGAGCCAGTGCT	chrX:9465711-9465751	CCGATGGTTTTACAGATCGA
chrX_C4	CGATTACCCGATAGGACGAACTATATGAGAGAGGAGAAGCAGTAGAGAGAGGCTGGTGAGCCGATGGTTTTACAGATCGA	CGATTACCCGATAGGACGAA	CTATATGAGAGAGGAGAAGCAGTAGAGAGAGGCTGGTGAG	chrX:9465753-9465793	CCGATGGTTTTACAGATCGA
chrX_C4	CGATTACCCGATAGGACGAAGAATACCCGTATTCCTCTTCCCCAGAGTCTCATCATGGGACCGATGGTTTTACAGATCGA	CGATTACCCGATAGGACGAA	GAATACCCGTATTCCTCTTCCCCAGAGTCTCATCATGGGA	chrX:9465795-9465835	CCGATGGTTTTACAGATCGA
chrX_C4	CGATTACCCGATAGGACGAAAAAAGCTCCTCCAAGAGATCAGGAAAGAAATTTCCTTCACCCGATGGTTTTACAGATCGA	CGATTACCCGATAGGACGAA	AAAAGCTCCTCCAAGAGATCAGGAAAGAAATTTCCTTCAC	chrX:9465840-9465880	CCGATGGTTTTACAGATCGA
chrX_C4	CGATTACCCGATAGGACGAACAGAGGAGTTTCTCTTAGGAGCTACTTATATGTTTTGTTTCCGATGGTTTTACAGATCGA	CGATTACCCGATAGGACGAA	CAGAGGAGTTTCTCTTAGGAGCTACTTATATGTTTTGTTT	chrX:9465882-9465922	CCGATGGTTTTACAGATCGA
chrX_C4	CGATTACCCGATAGGACGAATTTTACTCCAAGTCAACATTTTAAGTTCAAACCTGAGGAGCCGATGGTTTTACAGATCGA	CGATTACCCGATAGGACGAA	TTTTACTCCAAGTCAACATTTTAAGTTCAAACCTGAGGAG	chrX:9465939-9465979	CCGATGGTTTTACAGATCGA
chrX_C4	CGATTACCCGATAGGACGAAGTGGGTGGGATACATTTACTTTGACTTCTTGTTTATTCACCCGATGGTTTTACAGATCGA	CGATTACCCGATAGGACGAA	GTGGGTGGGATACATTTACTTTGACTTCTTGTTTATTCAC	chrX:9465981-9466021	CCGATGGTTTTACAGATCGA
chrX_C4	CGATTACCCGATAGGACGAAATTTTCCTATGCACACTTTATCACAGATCTATCTTTCCACCCGATGGTTTTACAGATCGA	CGATTACCCGATAGGACGAA	ATTTTCCTATGCACACTTTATCACAGATCTATCTTTCCAC	chrX:9466042-9466082	CCGATGGTTTTACAGATCGA
chrX_C4	CGATTACCCGATAGGACGAAAGTTCTCCATCAGAGAATATCAGGTGTCTCCTTTATTTGCCCGATGGTTTTACAGATCGA	CGATTACCCGATAGGACGAA	AGTTCTCCATCAGAGAATATCAGGTGTCTCCTTTATTTGC	chrX:9466084-9466124	CCGATGGTTTTACAGATCGA
chrX_C4	CGATTACCCGATAGGACGAATTTTGTTTAGTCTGGTGTTCAGCAAGCTCTGGGGACCCTACCGATGGTTTTACAGATCGA	CGATTACCCGATAGGACGAA	TTTTGTTTAGTCTGGTGTTCAGCAAGCTCTGGGGACCCTA	chrX:9466177-9466217	CCGATGGTTTTACAGATCGA
chrX_C4	CGATTACCCGATAGGACGAAGACCCAGCTACTCCCTTCCTCTCCCAGTAGTGGAGTTATACCGATGGTTTTACAGATCGA	CGATTACCCGATAGGACGAA	GACCCAGCTACTCCCTTCCTCTCCCAGTAGTGGAGTTATA	chrX:9466219-9466259	CCGATGGTTTTACAGATCGA
chrX_C4	CGATTACCCGATAGGACGAAACATGGAGGTTGGGGATCTAAAGTTTTGCCCTTATGCTTACCGATGGTTTTACAGATCGA	CGATTACCCGATAGGACGAA	ACATGGAGGTTGGGGATCTAAAGTTTTGCCCTTATGCTTA	chrX:9466284-9466324	CCGATGGTTTTACAGATCGA
chrX_C4	CGATTACCCGATAGGACGAATTTTAAAGTAAGTTGCATGCATCGGCTTACTTCCTCCTAACCGATGGTTTTACAGATCGA	CGATTACCCGATAGGACGAA	TTTTAAAGTAAGTTGCATGCATCGGCTTACTTCCTCCTAA	chrX:9466385-9466425	CCGATGGTTTTACAGATCGA
chrX_C4	CGATTACCCGATAGGACGAAAGCACATATACCATTAACATGAGGTCAGTATCAAAACTAGCCGATGGTTTTACAGATCGA	CGATTACCCGATAGGACGAA	AGCACATATACCATTAACATGAGGTCAGTATCAAAACTAG	chrX:9466432-9466472	CCGATGGTTTTACAGATCGA
chrX_C4	CGATTACCCGATAGGACGAACTTTGATTTGAAACGAAGTTCCCTTAGCATTTAGTCCTTACCGATGGTTTTACAGATCGA	CGATTACCCGATAGGACGAA	CTTTGATTTGAAACGAAGTTCCCTTAGCATTTAGTCCTTA	chrX:9466474-9466514	CCGATGGTTTTACAGATCGA
chrX_C4	CGATTACCCGATAGGACGAATGTAACTTAAGTTGGTATGGTGTAACACTTGGGCAAAATCCCGATGGTTTTACAGATCGA	CGATTACCCGATAGGACGAA	TGTAACTTAAGTTGGTATGGTGTAACACTTGGGCAAAATC	chrX:9466516-9466556	CCGATGGTTTTACAGATCGA
chrX_C4	CGATTACCCGATAGGACGAACATATTATTAATGGAACAAATGATGTGTCCCAAATGTGCCCCGATGGTTTTACAGATCGA	CGATTACCCGATAGGACGAA	CATATTATTAATGGAACAAATGATGTGTCCCAAATGTGCC	chrX:9466680-9466720	CCGATGGTTTTACAGATCGA
chrX_C4	CGATTACCCGATAGGACGAAAAAACCAGAACATTCCAATTGTCACACCAGAGCCACCCTGCCGATGGTTTTACAGATCGA	CGATTACCCGATAGGACGAA	AAAACCAGAACATTCCAATTGTCACACCAGAGCCACCCTG	chrX:9466742-9466782	CCGATGGTTTTACAGATCGA
chrX_C4	CGATTACCCGATAGGACGAAGCTCTCAGTAAGCTTTCTATTCTTCAGTAAGCTTTCTATTCCGATGGTTTTACAGATCGA	CGATTACCCGATAGGACGAA	GCTCTCAGTAAGCTTTCTATTCTTCAGTAAGCTTTCTATT	chrX:9466784-9466824	CCGATGGTTTTACAGATCGA
chrX_C4	CGATTACCCGATAGGACGAAAGACATTTCAATGTTAAGCTCAGCACATATTGGTGGGTAGCCGATGGTTTTACAGATCGA	CGATTACCCGATAGGACGAA	AGACATTTCAATGTTAAGCTCAGCACATATTGGTGGGTAG	chrX:9466826-9466866	CCGATGGTTTTACAGATCGA
chrX_C4	CGATTACCCGATAGGACGAAATGTGGCTAGGACCCTCTGCCATACTTCAGCTTGTTACACCCGATGGTTTTACAGATCGA	CGATTACCCGATAGGACGAA	ATGTGGCTAGGACCCTCTGCCATACTTCAGCTTGTTACAC	chrX:9466868-9466908	CCGATGGTTTTACAGATCGA
chrX_C4	CGATTACCCGATAGGACGAAGCAGGCCATAAAGGACTCTTGCCAAAGAATTTCCAATGGGCCGATGGTTTTACAGATCGA	CGATTACCCGATAGGACGAA	GCAGGCCATAAAGGACTCTTGCCAAAGAATTTCCAATGGG	chrX:9466910-9466950	CCGATGGTTTTACAGATCGA
chrX_C4	CGATTACCCGATAGGACGAAGATAAAGCTGGTGGTGTTGTCTTAGTTGGTCAGGAGATTTCCGATGGTTTTACAGATCGA	CGATTACCCGATAGGACGAA	GATAAAGCTGGTGGTGTTGTCTTAGTTGGTCAGGAGATTT	chrX:9466952-9466992	CCGATGGTTTTACAGATCGA
chrX_C4	CGATTACCCGATAGGACGAAAAAACTTAACAAGGAATATGTGTGAATACAACGGACTGCACCGATGGTTTTACAGATCGA	CGATTACCCGATAGGACGAA	AAAACTTAACAAGGAATATGTGTGAATACAACGGACTGCA	chrX:9466997-9467037	CCGATGGTTTTACAGATCGA
chrX_C4	CGATTACCCGATAGGACGAACGTGAGCTGGCCAAGATTGCATGAGGCAGAAGTTATACTTCCGATGGTTTTACAGATCGA	CGATTACCCGATAGGACGAA	CGTGAGCTGGCCAAGATTGCATGAGGCAGAAGTTATACTT	chrX:9467039-9467079	CCGATGGTTTTACAGATCGA
chrX_C4	CGATTACCCGATAGGACGAACCCAAGGAGTTTTCGAGTATAATTATACTTAGGCCCATCACCGATGGTTTTACAGATCGA	CGATTACCCGATAGGACGAA	CCCAAGGAGTTTTCGAGTATAATTATACTTAGGCCCATCA	chrX:9467081-9467121	CCGATGGTTTTACAGATCGA
chrX_C4	CGATTACCCGATAGGACGAAATAAACCTTGTAGTAGTTGATAAAGAGGAAGACATTCAGCCCGATGGTTTTACAGATCGA	CGATTACCCGATAGGACGAA	ATAAACCTTGTAGTAGTTGATAAAGAGGAAGACATTCAGC	chrX:9467123-9467163	CCGATGGTTTTACAGATCGA
chrX_C4	CGATTACCCGATAGGACGAACAACCACACCAGCTGCACAAACAGGAAAAGTTGTATGAGGCCGATGGTTTTACAGATCGA	CGATTACCCGATAGGACGAA	CAACCACACCAGCTGCACAAACAGGAAAAGTTGTATGAGG	chrX:9467165-9467205	CCGATGGTTTTACAGATCGA
chrX_C4	CGATTACCCGATAGGACGAATATATCTCTCAAGAGGGAGATTCCATATGAGACTGGAGGCCCGATGGTTTTACAGATCGA	CGATTACCCGATAGGACGAA	TATATCTCTCAAGAGGGAGATTCCATATGAGACTGGAGGC	chrX:9467207-9467247	CCGATGGTTTTACAGATCGA
chrX_C4	CGATTACCCGATAGGACGAAATGAAGGCCAGGACTTCCCCAAGTTCAGACTCTGACAGGGCCGATGGTTTTACAGATCGA	CGATTACCCGATAGGACGAA	ATGAAGGCCAGGACTTCCCCAAGTTCAGACTCTGACAGGG	chrX:9467249-9467289	CCGATGGTTTTACAGATCGA
chrX_C4	CGATTACCCGATAGGACGAAGGGTGCACCCAGCTCAGTGCCAGCTCTTTCCTATTACAGCCCGATGGTTTTACAGATCGA	CGATTACCCGATAGGACGAA	GGGTGCACCCAGCTCAGTGCCAGCTCTTTCCTATTACAGC	chrX:9467291-9467331	CCGATGGTTTTACAGATCGA
chrX_C4	CGATTACCCGATAGGACGAACTCTACACTTTTCTGGAACTGTCTTTACCTTCCTTCATTGCCGATGGTTTTACAGATCGA	CGATTACCCGATAGGACGAA	CTCTACACTTTTCTGGAACTGTCTTTACCTTCCTTCATTG	chrX:9467333-9467373	CCGATGGTTTTACAGATCGA
chrX_C4	CGATTACCCGATAGGACGAATTGTATGATTGCTTCACTACCTGGTCAACATACTGAATTACCGATGGTTTTACAGATCGA	CGATTACCCGATAGGACGAA	TTGTATGATTGCTTCACTACCTGGTCAACATACTGAATTA	chrX:9467375-9467415	CCGATGGTTTTACAGATCGA
chrX_C4	CGATTACCCGATAGGACGAATCAGTCTCTCTTGTCTCTTTTCTCTTTCCTCTTCTTTTCACCGATGGTTTTACAGATCGA	CGATTACCCGATAGGACGAA	TCAGTCTCTCTTGTCTCTTTTCTCTTTCCTCTTCTTTTCA	chrX:9467418-9467458	CCGATGGTTTTACAGATCGA
chrX_C4	CGATTACCCGATAGGACGAATTAACTTCAGACAGGTAACAGTGATTGGGGAGTAAAGAGCCCGATGGTTTTACAGATCGA	CGATTACCCGATAGGACGAA	TTAACTTCAGACAGGTAACAGTGATTGGGGAGTAAAGAGC	chrX:9467460-9467500	CCGATGGTTTTACAGATCGA
chrX_C4	CGATTACCCGATAGGACGAAATGGAAATAAGGTATTGTTCTTGTCTCATGACCTGTAGGACCGATGGTTTTACAGATCGA	CGATTACCCGATAGGACGAA	ATGGAAATAAGGTATTGTTCTTGTCTCATGACCTGTAGGA	chrX:9467502-9467542	CCGATGGTTTTACAGATCGA
chrX_C4	CGATTACCCGATAGGACGAATTGAACTCTGTGCTCACAGATGACAGTCACCTGCAGCACACCGATGGTTTTACAGATCGA	CGATTACCCGATAGGACGAA	TTGAACTCTGTGCTCACAGATGACAGTCACCTGCAGCACA	chrX:9467544-9467584	CCGATGGTTTTACAGATCGA
chrX_C4	CGATTACCCGATAGGACGAATTTTAAAGGACGGAATATTGAGTGTGGGCAAGGGGATGAACCGATGGTTTTACAGATCGA	CGATTACCCGATAGGACGAA	TTTTAAAGGACGGAATATTGAGTGTGGGCAAGGGGATGAA	chrX:9467616-9467656	CCGATGGTTTTACAGATCGA
chrX_C4	CGATTACCCGATAGGACGAATAAATGCTCTAGGTTTTAAGTTCACATTGATCCCAACAACCCGATGGTTTTACAGATCGA	CGATTACCCGATAGGACGAA	TAAATGCTCTAGGTTTTAAGTTCACATTGATCCCAACAAC	chrX:9467679-9467719	CCGATGGTTTTACAGATCGA
chrX_C4	CGATTACCCGATAGGACGAAACTTATCAAGGAATGATACTGCTCAGTGTTCTACTTCAGCCCGATGGTTTTACAGATCGA	CGATTACCCGATAGGACGAA	ACTTATCAAGGAATGATACTGCTCAGTGTTCTACTTCAGC	chrX:9467721-9467761	CCGATGGTTTTACAGATCGA
chrX_C4	CGATTACCCGATAGGACGAATAGTATTAACTATTGAATACCCATGGATGCTTCTTAGCAGCCGATGGTTTTACAGATCGA	CGATTACCCGATAGGACGAA	TAGTATTAACTATTGAATACCCATGGATGCTTCTTAGCAG	chrX:9467800-9467840	CCGATGGTTTTACAGATCGA
chrX_C4	CGATTACCCGATAGGACGAATCTCCTTACGCAGAAGGTTGCTATAGAAACTCCATGTTGTCCGATGGTTTTACAGATCGA	CGATTACCCGATAGGACGAA	TCTCCTTACGCAGAAGGTTGCTATAGAAACTCCATGTTGT	chrX:9467842-9467882	CCGATGGTTTTACAGATCGA
chrX_C4	CGATTACCCGATAGGACGAATACGTTGCTGTGCTCCCTAACTCTGGATTGCTAAGCCATGCCGATGGTTTTACAGATCGA	CGATTACCCGATAGGACGAA	TACGTTGCTGTGCTCCCTAACTCTGGATTGCTAAGCCATG	chrX:9467884-9467924	CCGATGGTTTTACAGATCGA
chrX_C4	CGATTACCCGATAGGACGAACATGTATATGCATAGGTAATTTAAAAGGTCACTTCCTGAGCCGATGGTTTTACAGATCGA	CGATTACCCGATAGGACGAA	CATGTATATGCATAGGTAATTTAAAAGGTCACTTCCTGAG	chrX:9467933-9467973	CCGATGGTTTTACAGATCGA
chrX_C4	CGATTACCCGATAGGACGAAAACCGTAATTCGAATGAAAGTTAGAGTTCAACTTGTTCCTCCGATGGTTTTACAGATCGA	CGATTACCCGATAGGACGAA	AACCGTAATTCGAATGAAAGTTAGAGTTCAACTTGTTCCT	chrX:9467975-9468015	CCGATGGTTTTACAGATCGA
chrX_C4	CGATTACCCGATAGGACGAAGCTGAGTCACCTGCTCTTAAAGTGGTAGCAAGGACGGAAGCCGATGGTTTTACAGATCGA	CGATTACCCGATAGGACGAA	GCTGAGTCACCTGCTCTTAAAGTGGTAGCAAGGACGGAAG	chrX:9468017-9468057	CCGATGGTTTTACAGATCGA
chrX_C4	CGATTACCCGATAGGACGAATAGAGTTCCCAATCCTCACGCGTCTATATTGCATTAGCATCCGATGGTTTTACAGATCGA	CGATTACCCGATAGGACGAA	TAGAGTTCCCAATCCTCACGCGTCTATATTGCATTAGCAT	chrX:9468059-9468099	CCGATGGTTTTACAGATCGA
chrX_C4	CGATTACCCGATAGGACGAATTAGAACTCTGACTCTGTGCATTAATTACATGGTTAATCCCCGATGGTTTTACAGATCGA	CGATTACCCGATAGGACGAA	TTAGAACTCTGACTCTGTGCATTAATTACATGGTTAATCC	chrX:9468177-9468217	CCGATGGTTTTACAGATCGA
chrX_C4	CGATTACCCGATAGGACGAAAGTACCTTTTAATATCATGTTTCATGAGCTGTTAGCCAACCCGATGGTTTTACAGATCGA	CGATTACCCGATAGGACGAA	AGTACCTTTTAATATCATGTTTCATGAGCTGTTAGCCAAC	chrX:9468237-9468277	CCGATGGTTTTACAGATCGA
chrX_C4	CGATTACCCGATAGGACGAAACCTCCATTTGTTGTAAAATTCACAAGTTACTCCAGTTTGCCGATGGTTTTACAGATCGA	CGATTACCCGATAGGACGAA	ACCTCCATTTGTTGTAAAATTCACAAGTTACTCCAGTTTG	chrX:9468500-9468540	CCGATGGTTTTACAGATCGA
chrX_C4	CGATTACCCGATAGGACGAACTTGAGAACTTTATTTTGGTGTTATGACTGAAATAGAGCCCCGATGGTTTTACAGATCGA	CGATTACCCGATAGGACGAA	CTTGAGAACTTTATTTTGGTGTTATGACTGAAATAGAGCC	chrX:9468580-9468620	CCGATGGTTTTACAGATCGA
chrX_C4	CGATTACCCGATAGGACGAATTAGTATGAAGTATCTTTTATGCACTCTGGTAAATGCTGGCCGATGGTTTTACAGATCGA	CGATTACCCGATAGGACGAA	TTAGTATGAAGTATCTTTTATGCACTCTGGTAAATGCTGG	chrX:9468762-9468802	CCGATGGTTTTACAGATCGA
chrX_C4	CGATTACCCGATAGGACGAAGTCTTAGGAACTCAGAAATAAACTATGAAAATGAGAGCTGCCGATGGTTTTACAGATCGA	CGATTACCCGATAGGACGAA	GTCTTAGGAACTCAGAAATAAACTATGAAAATGAGAGCTG	chrX:9468813-9468853	CCGATGGTTTTACAGATCGA
chrX_C4	CGATTACCCGATAGGACGAATGCTGGGATTAAAGGCGTGCTGGGATTAAGAAGCCTGGGACCGATGGTTTTACAGATCGA	CGATTACCCGATAGGACGAA	TGCTGGGATTAAAGGCGTGCTGGGATTAAGAAGCCTGGGA	chrX:9469006-9469046	CCGATGGTTTTACAGATCGA
chrX_C4	CGATTACCCGATAGGACGAAGGAAAATTAACCGAATCTACCTGCAAGCAGATGCTTGTTCCCGATGGTTTTACAGATCGA	CGATTACCCGATAGGACGAA	GGAAAATTAACCGAATCTACCTGCAAGCAGATGCTTGTTC	chrX:9469048-9469088	CCGATGGTTTTACAGATCGA
chrX_C4	CGATTACCCGATAGGACGAACAACAATAATAAAAGCCATTGCTCTAGTTCACATTCCAAGCCGATGGTTTTACAGATCGA	CGATTACCCGATAGGACGAA	CAACAATAATAAAAGCCATTGCTCTAGTTCACATTCCAAG	chrX:9469115-9469155	CCGATGGTTTTACAGATCGA
chrX_C4	CGATTACCCGATAGGACGAAAAATGTATGTTACCTGGTTTGGGTACTTACAATGACAAAGCCGATGGTTTTACAGATCGA	CGATTACCCGATAGGACGAA	AAATGTATGTTACCTGGTTTGGGTACTTACAATGACAAAG	chrX:9469174-9469214	CCGATGGTTTTACAGATCGA
chrX_C4	CGATTACCCGATAGGACGAAGGAGAGTCCTTCATTCACAGCCCAGTTCCCCATGTTAGCACCGATGGTTTTACAGATCGA	CGATTACCCGATAGGACGAA	GGAGAGTCCTTCATTCACAGCCCAGTTCCCCATGTTAGCA	chrX:9469216-9469256	CCGATGGTTTTACAGATCGA
chrX_C4	CGATTACCCGATAGGACGAAGGTTAAGTGTTGGTTCTGCCTCTCTTCTCTACTGTGCTTCCCGATGGTTTTACAGATCGA	CGATTACCCGATAGGACGAA	GGTTAAGTGTTGGTTCTGCCTCTCTTCTCTACTGTGCTTC	chrX:9469258-9469298	CCGATGGTTTTACAGATCGA
chrX_C4	CGATTACCCGATAGGACGAACTTCTGATGAGGAAATGAAAACAGCAGCTTTGGGGCAATACCGATGGTTTTACAGATCGA	CGATTACCCGATAGGACGAA	CTTCTGATGAGGAAATGAAAACAGCAGCTTTGGGGCAATA	chrX:9469300-9469340	CCGATGGTTTTACAGATCGA
chrX_C4	CGATTACCCGATAGGACGAACTATTATCAGAAATTAGCTAATCATTGGCCAACTGAAAGGCCGATGGTTTTACAGATCGA	CGATTACCCGATAGGACGAA	CTATTATCAGAAATTAGCTAATCATTGGCCAACTGAAAGG	chrX:9469351-9469391	CCGATGGTTTTACAGATCGA
chrX_C4	CGATTACCCGATAGGACGAAACTACAGAAAGAGAAAAGATCTTGTGATTCAGTCACAAGTCCGATGGTTTTACAGATCGA	CGATTACCCGATAGGACGAA	ACTACAGAAAGAGAAAAGATCTTGTGATTCAGTCACAAGT	chrX:9469431-9469471	CCGATGGTTTTACAGATCGA
chrX_C4	CGATTACCCGATAGGACGAAATACACTGGAAAATGAAAGCTACTGCTACAACTCAGAGACCCGATGGTTTTACAGATCGA	CGATTACCCGATAGGACGAA	ATACACTGGAAAATGAAAGCTACTGCTACAACTCAGAGAC	chrX:9469473-9469513	CCGATGGTTTTACAGATCGA
chrX_C4	CGATTACCCGATAGGACGAAAAGATTATCTGTGTAGTTTGTGGGTGTATTTTAGACAGTGCCGATGGTTTTACAGATCGA	CGATTACCCGATAGGACGAA	AAGATTATCTGTGTAGTTTGTGGGTGTATTTTAGACAGTG	chrX:9469549-9469589	CCGATGGTTTTACAGATCGA
chrX_C4	CGATTACCCGATAGGACGAACAAGTTATCCAACTAGCTAGATAAAACACATGTTCTTCTCCCGATGGTTTTACAGATCGA	CGATTACCCGATAGGACGAA	CAAGTTATCCAACTAGCTAGATAAAACACATGTTCTTCTC	chrX:9469630-9469670	CCGATGGTTTTACAGATCGA
chrX_C4	CGATTACCCGATAGGACGAAAGGCTCTTCCAACAATACTGATTCTCATTGGGTAAAGTTACCGATGGTTTTACAGATCGA	CGATTACCCGATAGGACGAA	AGGCTCTTCCAACAATACTGATTCTCATTGGGTAAAGTTA	chrX:9469672-9469712	CCGATGGTTTTACAGATCGA
chrX_C4	CGATTACCCGATAGGACGAAAGGAGTGATAGATGTTAGTTATAGGATGATTATCAGATGCCCGATGGTTTTACAGATCGA	CGATTACCCGATAGGACGAA	AGGAGTGATAGATGTTAGTTATAGGATGATTATCAGATGC	chrX:9469715-9469755	CCGATGGTTTTACAGATCGA
chrX_C4	CGATTACCCGATAGGACGAATATGATTACATTTATAAATGAGGAAGCTGAGACCCAGAACCCGATGGTTTTACAGATCGA	CGATTACCCGATAGGACGAA	TATGATTACATTTATAAATGAGGAAGCTGAGACCCAGAAC	chrX:9469934-9469974	CCGATGGTTTTACAGATCGA
chrX_C4	CGATTACCCGATAGGACGAATGAATTTACTTGGACCCAGTTACAGTGCCAAGGAATAATACCGATGGTTTTACAGATCGA	CGATTACCCGATAGGACGAA	TGAATTTACTTGGACCCAGTTACAGTGCCAAGGAATAATA	chrX:9469976-9470016	CCGATGGTTTTACAGATCGA
chrX_C4	CGATTACCCGATAGGACGAATGAAGTCCAAACAACTGATATCACTTGTAAGTACAATACCCCGATGGTTTTACAGATCGA	CGATTACCCGATAGGACGAA	TGAAGTCCAAACAACTGATATCACTTGTAAGTACAATACC	chrX:9470028-9470068	CCGATGGTTTTACAGATCGA
chrX_C4	CGATTACCCGATAGGACGAAAAAACAAGCTTAAATTTGTCACCTCCACCCTAAACACCCCCCGATGGTTTTACAGATCGA	CGATTACCCGATAGGACGAA	AAAACAAGCTTAAATTTGTCACCTCCACCCTAAACACCCC	chrX:9470078-9470118	CCGATGGTTTTACAGATCGA
chrX_C4	CGATTACCCGATAGGACGAACAGCAATGGAAATACCAAAATGTTTAGATAACAATCACGGCCGATGGTTTTACAGATCGA	CGATTACCCGATAGGACGAA	CAGCAATGGAAATACCAAAATGTTTAGATAACAATCACGG	chrX:9470129-9470169	CCGATGGTTTTACAGATCGA
chrX_C4	CGATTACCCGATAGGACGAACCAGGTAGACTTTCTATATGCTAAGCTTGTAAACATGGTCCCGATGGTTTTACAGATCGA	CGATTACCCGATAGGACGAA	CCAGGTAGACTTTCTATATGCTAAGCTTGTAAACATGGTC	chrX:9470171-9470211	CCGATGGTTTTACAGATCGA
chrX_C4	CGATTACCCGATAGGACGAAATCGAAGGTACATCAGTGTACGGTAGATGCTAAAGCCAAACCGATGGTTTTACAGATCGA	CGATTACCCGATAGGACGAA	ATCGAAGGTACATCAGTGTACGGTAGATGCTAAAGCCAAA	chrX:9470213-9470253	CCGATGGTTTTACAGATCGA
chrX_C4	CGATTACCCGATAGGACGAAGAACACAACTACCTCCTGGCAGGTACTCAGGCTTCAAGACCCGATGGTTTTACAGATCGA	CGATTACCCGATAGGACGAA	GAACACAACTACCTCCTGGCAGGTACTCAGGCTTCAAGAC	chrX:9470255-9470295	CCGATGGTTTTACAGATCGA
chrX_C4	CGATTACCCGATAGGACGAAGAAACAGAAGGCTATGAAGGCAACCTGATGGTGTGGTGAACCGATGGTTTTACAGATCGA	CGATTACCCGATAGGACGAA	GAAACAGAAGGCTATGAAGGCAACCTGATGGTGTGGTGAA	chrX:9470297-9470337	CCGATGGTTTTACAGATCGA
chrX_C4	CGATTACCCGATAGGACGAATTGACTGACTGCACAAGCAGGGCTCTACAGTCGTTACATCCCGATGGTTTTACAGATCGA	CGATTACCCGATAGGACGAA	TTGACTGACTGCACAAGCAGGGCTCTACAGTCGTTACATC	chrX:9470339-9470379	CCGATGGTTTTACAGATCGA
chrX_C4	CGATTACCCGATAGGACGAACCAACATGAGCTACATGTGAAGACCCTGTCTATATGGCTTGTCGAATATACGTCTGTCGA	CGATTACCCGATAGGACGAA	CCAACATGAGCTACATGTGAAGACCCTGTCTATATGGCTT	chrX:10497528-10497568	GTCGAATATACGTCTGTCGA
chrX_C4	CGATTACCCGATAGGACGAATCTCATTTGGATAGCTCTGAACTAGAAAAGTGATATAGTGGTCGAATATACGTCTGTCGA	CGATTACCCGATAGGACGAA	TCTCATTTGGATAGCTCTGAACTAGAAAAGTGATATAGTG	chrX:10497577-10497617	GTCGAATATACGTCTGTCGA
chrX_C4	CGATTACCCGATAGGACGAACTCGTGTTTGGAGGGACTAGAATGAGTTTAGTCATACTAAGTCGAATATACGTCTGTCGA	CGATTACCCGATAGGACGAA	CTCGTGTTTGGAGGGACTAGAATGAGTTTAGTCATACTAA	chrX:10497619-10497659	GTCGAATATACGTCTGTCGA
chrX_C4	CGATTACCCGATAGGACGAAGGAAAGGTGTGTGGTCTATTTAGGTAAGCTAGGGATAGGTGTCGAATATACGTCTGTCGA	CGATTACCCGATAGGACGAA	GGAAAGGTGTGTGGTCTATTTAGGTAAGCTAGGGATAGGT	chrX:10497661-10497701	GTCGAATATACGTCTGTCGA
chrX_C4	CGATTACCCGATAGGACGAATATTATTGGTTGACTAGGACTGGCTGGCTAGCACAAGGAAGTCGAATATACGTCTGTCGA	CGATTACCCGATAGGACGAA	TATTATTGGTTGACTAGGACTGGCTGGCTAGCACAAGGAA	chrX:10497703-10497743	GTCGAATATACGTCTGTCGA
chrX_C4	CGATTACCCGATAGGACGAACTCTTTCACAGTTCTGAACACATAGATGAGAGATACACTTGTCGAATATACGTCTGTCGA	CGATTACCCGATAGGACGAA	CTCTTTCACAGTTCTGAACACATAGATGAGAGATACACTT	chrX:10497745-10497785	GTCGAATATACGTCTGTCGA
chrX_C4	CGATTACCCGATAGGACGAACAGGTCTAGTCTGAAAGCATTAAATTGCCATACAAAGGCAGTCGAATATACGTCTGTCGA	CGATTACCCGATAGGACGAA	CAGGTCTAGTCTGAAAGCATTAAATTGCCATACAAAGGCA	chrX:10497787-10497827	GTCGAATATACGTCTGTCGA
chrX_C4	CGATTACCCGATAGGACGAAAGAAAGTGAAACCAGCTTACCTAGCTAGGAAGTGAAGTCTGTCGAATATACGTCTGTCGA	CGATTACCCGATAGGACGAA	AGAAAGTGAAACCAGCTTACCTAGCTAGGAAGTGAAGTCT	chrX:10497829-10497869	GTCGAATATACGTCTGTCGA
chrX_C4	CGATTACCCGATAGGACGAATTTCAGGTGACTTGAGAATGAGCAGTGGAGGACAGAAGATGTCGAATATACGTCTGTCGA	CGATTACCCGATAGGACGAA	TTTCAGGTGACTTGAGAATGAGCAGTGGAGGACAGAAGAT	chrX:10497871-10497911	GTCGAATATACGTCTGTCGA
chrX_C4	CGATTACCCGATAGGACGAACTTCTTTAGGATATATGGCAAGAACAGTATTCTGCGCTTAGTCGAATATACGTCTGTCGA	CGATTACCCGATAGGACGAA	CTTCTTTAGGATATATGGCAAGAACAGTATTCTGCGCTTA	chrX:10497913-10497953	GTCGAATATACGTCTGTCGA
chrX_C4	CGATTACCCGATAGGACGAAGATCCTAGCTGATGTTGATACCCCTGTGGCACTGTAGACCGTCGAATATACGTCTGTCGA	CGATTACCCGATAGGACGAA	GATCCTAGCTGATGTTGATACCCCTGTGGCACTGTAGACC	chrX:10497955-10497995	GTCGAATATACGTCTGTCGA
chrX_C4	CGATTACCCGATAGGACGAAAAGGAGCTGGTTTAACATTGATAGGATCTGTTATAGTTTGGTCGAATATACGTCTGTCGA	CGATTACCCGATAGGACGAA	AAGGAGCTGGTTTAACATTGATAGGATCTGTTATAGTTTG	chrX:10497997-10498037	GTCGAATATACGTCTGTCGA
chrX_C4	CGATTACCCGATAGGACGAATGCTTAGTTTGAGATAACAGTAACTTTGAAGGATAGGTTGGTCGAATATACGTCTGTCGA	CGATTACCCGATAGGACGAA	TGCTTAGTTTGAGATAACAGTAACTTTGAAGGATAGGTTG	chrX:10498041-10498081	GTCGAATATACGTCTGTCGA
chrX_C4	CGATTACCCGATAGGACGAATCTCAGAAGTTTGCTGTATTTTCTAGCTGATGGTGGTGAAGTCGAATATACGTCTGTCGA	CGATTACCCGATAGGACGAA	TCTCAGAAGTTTGCTGTATTTTCTAGCTGATGGTGGTGAA	chrX:10498083-10498123	GTCGAATATACGTCTGTCGA
chrX_C4	CGATTACCCGATAGGACGAATTTGGCCATCTCTGTACTGTGTGGCACCTACCTCTCACCCGTCGAATATACGTCTGTCGA	CGATTACCCGATAGGACGAA	TTTGGCCATCTCTGTACTGTGTGGCACCTACCTCTCACCC	chrX:10498125-10498165	GTCGAATATACGTCTGTCGA
chrX_C4	CGATTACCCGATAGGACGAACGTGGTCACAGTTGGTTGACCTGGGGAGAAAGATACGACTGTCGAATATACGTCTGTCGA	CGATTACCCGATAGGACGAA	CGTGGTCACAGTTGGTTGACCTGGGGAGAAAGATACGACT	chrX:10498167-10498207	GTCGAATATACGTCTGTCGA
chrX_C4	CGATTACCCGATAGGACGAATATTTGTATATTGGCTGGTCAGTGAAATGTGGGGTCAGGTGTCGAATATACGTCTGTCGA	CGATTACCCGATAGGACGAA	TATTTGTATATTGGCTGGTCAGTGAAATGTGGGGTCAGGT	chrX:10498209-10498249	GTCGAATATACGTCTGTCGA
chrX_C4	CGATTACCCGATAGGACGAAGCAGAAGAGAATGGCTCTTCTTTTGCACTGGGAGAGTAGAGTCGAATATACGTCTGTCGA	CGATTACCCGATAGGACGAA	GCAGAAGAGAATGGCTCTTCTTTTGCACTGGGAGAGTAGA	chrX:10498251-10498291	GTCGAATATACGTCTGTCGA
chrX_C4	CGATTACCCGATAGGACGAAAAGCACCTGTTGATGTTGGGCAGGAGAAACTCAGAGGAAGGTCGAATATACGTCTGTCGA	CGATTACCCGATAGGACGAA	AAGCACCTGTTGATGTTGGGCAGGAGAAACTCAGAGGAAG	chrX:10498293-10498333	GTCGAATATACGTCTGTCGA
chrX_C4	CGATTACCCGATAGGACGAAAACAGTAGATGCATGCACGCTGGAGACCTGGAATGGACACGTCGAATATACGTCTGTCGA	CGATTACCCGATAGGACGAA	AACAGTAGATGCATGCACGCTGGAGACCTGGAATGGACAC	chrX:10498335-10498375	GTCGAATATACGTCTGTCGA
chrX_C4	CGATTACCCGATAGGACGAATGAACTCCCAGTCAGTAACTCATATAGGTTCCTGGACAGCGTCGAATATACGTCTGTCGA	CGATTACCCGATAGGACGAA	TGAACTCCCAGTCAGTAACTCATATAGGTTCCTGGACAGC	chrX:10498377-10498417	GTCGAATATACGTCTGTCGA
chrX_C4	CGATTACCCGATAGGACGAAGGTAGCAGCCCAATCATTTCCCTTCCAGCTGGAAGTGGCAGTCGAATATACGTCTGTCGA	CGATTACCCGATAGGACGAA	GGTAGCAGCCCAATCATTTCCCTTCCAGCTGGAAGTGGCA	chrX:10498419-10498459	GTCGAATATACGTCTGTCGA
chrX_C4	CGATTACCCGATAGGACGAATCATGTTTCTGGGAGGCCTGTCCAACTGGGGAGTGACTCCGTCGAATATACGTCTGTCGA	CGATTACCCGATAGGACGAA	TCATGTTTCTGGGAGGCCTGTCCAACTGGGGAGTGACTCC	chrX:10498461-10498501	GTCGAATATACGTCTGTCGA
chrX_C4	CGATTACCCGATAGGACGAACCTCCTCGGCTCCTGTTCTCTTAAATTTCTTGTCTAACCAGTCGAATATACGTCTGTCGA	CGATTACCCGATAGGACGAA	CCTCCTCGGCTCCTGTTCTCTTAAATTTCTTGTCTAACCA	chrX:10498504-10498544	GTCGAATATACGTCTGTCGA
chrX_C4	CGATTACCCGATAGGACGAAAAAGGTGATGAGTTGGATGTTTGAAGTGGTTAGAAAGGCAGTCGAATATACGTCTGTCGA	CGATTACCCGATAGGACGAA	AAAGGTGATGAGTTGGATGTTTGAAGTGGTTAGAAAGGCA	chrX:10498546-10498586	GTCGAATATACGTCTGTCGA
chrX_C4	CGATTACCCGATAGGACGAAGGTGGAATTACTAGAGCATCACAGGAGCAGTGTGTGGCTGGTCGAATATACGTCTGTCGA	CGATTACCCGATAGGACGAA	GGTGGAATTACTAGAGCATCACAGGAGCAGTGTGTGGCTG	chrX:10498588-10498628	GTCGAATATACGTCTGTCGA
chrX_C4	CGATTACCCGATAGGACGAAAGACAAGGTTGGGGAAAGCCCATTAGGTCATTTAAGAGGCGTCGAATATACGTCTGTCGA	CGATTACCCGATAGGACGAA	AGACAAGGTTGGGGAAAGCCCATTAGGTCATTTAAGAGGC	chrX:10498630-10498670	GTCGAATATACGTCTGTCGA
chrX_C4	CGATTACCCGATAGGACGAAGAGACAGTATAGCTATCCTTTTCAACTGTGTGGTACGCCCGTCGAATATACGTCTGTCGA	CGATTACCCGATAGGACGAA	GAGACAGTATAGCTATCCTTTTCAACTGTGTGGTACGCCC	chrX:10498672-10498712	GTCGAATATACGTCTGTCGA
chrX_C4	CGATTACCCGATAGGACGAATTCTAAGCACAGTTAATGCTATGTTGCTTGCTGATAATAGGTCGAATATACGTCTGTCGA	CGATTACCCGATAGGACGAA	TTCTAAGCACAGTTAATGCTATGTTGCTTGCTGATAATAG	chrX:10498716-10498756	GTCGAATATACGTCTGTCGA
chrX_C4	CGATTACCCGATAGGACGAAGTAGCAAAGCATTGCGCCACCAGGACTAAAGGAAGCCTGTGTCGAATATACGTCTGTCGA	CGATTACCCGATAGGACGAA	GTAGCAAAGCATTGCGCCACCAGGACTAAAGGAAGCCTGT	chrX:10498758-10498798	GTCGAATATACGTCTGTCGA
chrX_C4	CGATTACCCGATAGGACGAATTCCAGTAAGTCCTGTCTAAAGGATAAAGGTCCTCCTTCAGTCGAATATACGTCTGTCGA	CGATTACCCGATAGGACGAA	TTCCAGTAAGTCCTGTCTAAAGGATAAAGGTCCTCCTTCA	chrX:10498800-10498840	GTCGAATATACGTCTGTCGA
chrX_C4	CGATTACCCGATAGGACGAAGTAGTAGCAAATCATTTGAGCAAGTTACTCATTAAGCTCCGTCGAATATACGTCTGTCGA	CGATTACCCGATAGGACGAA	GTAGTAGCAAATCATTTGAGCAAGTTACTCATTAAGCTCC	chrX:10498842-10498882	GTCGAATATACGTCTGTCGA
chrX_C4	CGATTACCCGATAGGACGAATTTTGGAGAGTGAGCTTTGAAGTTCTTTAGGTTTGTATTCGTCGAATATACGTCTGTCGA	CGATTACCCGATAGGACGAA	TTTTGGAGAGTGAGCTTTGAAGTTCTTTAGGTTTGTATTC	chrX:10498899-10498939	GTCGAATATACGTCTGTCGA
chrX_C4	CGATTACCCGATAGGACGAAGGGGTGCCTAGAATACAGTGGTATTGCCCACCCTGATGGGGTCGAATATACGTCTGTCGA	CGATTACCCGATAGGACGAA	GGGGTGCCTAGAATACAGTGGTATTGCCCACCCTGATGGG	chrX:10499003-10499043	GTCGAATATACGTCTGTCGA
chrX_C4	CGATTACCCGATAGGACGAATATACATGCTTTCAGACAGGTAACTCTTTGAGAGGTGCCTGTCGAATATACGTCTGTCGA	CGATTACCCGATAGGACGAA	TATACATGCTTTCAGACAGGTAACTCTTTGAGAGGTGCCT	chrX:10499045-10499085	GTCGAATATACGTCTGTCGA
chrX_C4	CGATTACCCGATAGGACGAAATGCCTACTTACAGTCAGTGATGGTGGGTGGTGGAGGGGCGTCGAATATACGTCTGTCGA	CGATTACCCGATAGGACGAA	ATGCCTACTTACAGTCAGTGATGGTGGGTGGTGGAGGGGC	chrX:10499087-10499127	GTCGAATATACGTCTGTCGA
chrX_C4	CGATTACCCGATAGGACGAATCCTTAAAGTCTAATGACCACTGGAAAAGAAATGCACTGCGTCGAATATACGTCTGTCGA	CGATTACCCGATAGGACGAA	TCCTTAAAGTCTAATGACCACTGGAAAAGAAATGCACTGC	chrX:10499129-10499169	GTCGAATATACGTCTGTCGA
chrX_C4	CGATTACCCGATAGGACGAACATATTGTCAGGAACACAGGACAAAGTATGAGATGTTGGGGTCGAATATACGTCTGTCGA	CGATTACCCGATAGGACGAA	CATATTGTCAGGAACACAGGACAAAGTATGAGATGTTGGG	chrX:10499171-10499211	GTCGAATATACGTCTGTCGA
chrX_C4	CGATTACCCGATAGGACGAAAAAAGAGAGGCTCATAAATGAACACTCCAATTAAGAAGGTGTCGAATATACGTCTGTCGA	CGATTACCCGATAGGACGAA	AAAAGAGAGGCTCATAAATGAACACTCCAATTAAGAAGGT	chrX:10499259-10499299	GTCGAATATACGTCTGTCGA
chrX_C4	CGATTACCCGATAGGACGAATCAAATGAGTAGTCTAAGCAAACAGCATGGTATATGACATGTCGAATATACGTCTGTCGA	CGATTACCCGATAGGACGAA	TCAAATGAGTAGTCTAAGCAAACAGCATGGTATATGACAT	chrX:10499301-10499341	GTCGAATATACGTCTGTCGA
chrX_C4	CGATTACCCGATAGGACGAAAAAATAAGTGCATGGAACAGTTACTGAAGAGGTCTCCACAGTCGAATATACGTCTGTCGA	CGATTACCCGATAGGACGAA	AAAATAAGTGCATGGAACAGTTACTGAAGAGGTCTCCACA	chrX:10499357-10499397	GTCGAATATACGTCTGTCGA
chrX_C4	CGATTACCCGATAGGACGAACAATGTTAGCACTTATGGCTAAGAGGCAAAATACTTTATGGTCGAATATACGTCTGTCGA	CGATTACCCGATAGGACGAA	CAATGTTAGCACTTATGGCTAAGAGGCAAAATACTTTATG	chrX:10499399-10499439	GTCGAATATACGTCTGTCGA
chrX_C4	CGATTACCCGATAGGACGAATTCCCTTTTGGTGTGTTTTCCAAGGCTTCAACTAGCATTGGTCGAATATACGTCTGTCGA	CGATTACCCGATAGGACGAA	TTCCCTTTTGGTGTGTTTTCCAAGGCTTCAACTAGCATTG	chrX:10499441-10499481	GTCGAATATACGTCTGTCGA
chrX_C4	CGATTACCCGATAGGACGAAATCATTTCATTTATCATGGAACAGTTTATCAGCTCGATCCGTCGAATATACGTCTGTCGA	CGATTACCCGATAGGACGAA	ATCATTTCATTTATCATGGAACAGTTTATCAGCTCGATCC	chrX:10499594-10499634	GTCGAATATACGTCTGTCGA
chrX_C4	CGATTACCCGATAGGACGAAAGTCTCTTCAAAATAAAGGAAAATGTCTGTTCCTTTTGGGGTCGAATATACGTCTGTCGA	CGATTACCCGATAGGACGAA	AGTCTCTTCAAAATAAAGGAAAATGTCTGTTCCTTTTGGG	chrX:10499698-10499738	GTCGAATATACGTCTGTCGA
chrX_C4	CGATTACCCGATAGGACGAATAAGGAAATAATATAATTGCCTGCCAATCAGCTCTATCAGGTCGAATATACGTCTGTCGA	CGATTACCCGATAGGACGAA	TAAGGAAATAATATAATTGCCTGCCAATCAGCTCTATCAG	chrX:10499772-10499812	GTCGAATATACGTCTGTCGA
chrX_C4	CGATTACCCGATAGGACGAAAAGAAATATGAAAATTTTACACTCAGTGCCCTATCCTGTCGTCGAATATACGTCTGTCGA	CGATTACCCGATAGGACGAA	AAGAAATATGAAAATTTTACACTCAGTGCCCTATCCTGTC	chrX:10499855-10499895	GTCGAATATACGTCTGTCGA
chrX_C4	CGATTACCCGATAGGACGAAGCCTTGAATCTTAGCATTTTGGTTTAACATATTCTGTCACGTCGAATATACGTCTGTCGA	CGATTACCCGATAGGACGAA	GCCTTGAATCTTAGCATTTTGGTTTAACATATTCTGTCAC	chrX:10500048-10500088	GTCGAATATACGTCTGTCGA
chrX_C4	CGATTACCCGATAGGACGAATTCCATGTTAATAGATGAGGCTCAACCTTAGGGATTTTCCGTCGAATATACGTCTGTCGA	CGATTACCCGATAGGACGAA	TTCCATGTTAATAGATGAGGCTCAACCTTAGGGATTTTCC	chrX:10500090-10500130	GTCGAATATACGTCTGTCGA
chrX_C4	CGATTACCCGATAGGACGAATTTTGGAAACAAGCTTCATGTGTAGTTGATGGATGCTTTCGTCGAATATACGTCTGTCGA	CGATTACCCGATAGGACGAA	TTTTGGAAACAAGCTTCATGTGTAGTTGATGGATGCTTTC	chrX:10500604-10500644	GTCGAATATACGTCTGTCGA
chrX_C4	CGATTACCCGATAGGACGAAGCCATGACAGCTGTCACAAAAGATTGTTGTGGAGAAGGATGTCGAATATACGTCTGTCGA	CGATTACCCGATAGGACGAA	GCCATGACAGCTGTCACAAAAGATTGTTGTGGAGAAGGAT	chrX:10500646-10500686	GTCGAATATACGTCTGTCGA
chrX_C4	CGATTACCCGATAGGACGAATTTTGGCTGAGGCTAAGAATTTAGCCAAGTTGACACAAGGGTCGAATATACGTCTGTCGA	CGATTACCCGATAGGACGAA	TTTTGGCTGAGGCTAAGAATTTAGCCAAGTTGACACAAGG	chrX:10500725-10500765	GTCGAATATACGTCTGTCGA
chrX_C4	CGATTACCCGATAGGACGAATATTCACACTGTGTTGACTTTACATATATGCTGAACTGTCGTCGAATATACGTCTGTCGA	CGATTACCCGATAGGACGAA	TATTCACACTGTGTTGACTTTACATATATGCTGAACTGTC	chrX:10500789-10500829	GTCGAATATACGTCTGTCGA
chrX_C4	CGATTACCCGATAGGACGAAAAGAGAGCAATGGTCTGAAGACATGATCAAAACAGAAAGCGTCGAATATACGTCTGTCGA	CGATTACCCGATAGGACGAA	AAGAGAGCAATGGTCTGAAGACATGATCAAAACAGAAAGC	chrX:10500831-10500871	GTCGAATATACGTCTGTCGA
chrX_C4	CGATTACCCGATAGGACGAATTTAAAACAAGTACCAGTAAATACTGGAGTTAGTGATGGGGTCGAATATACGTCTGTCGA	CGATTACCCGATAGGACGAA	TTTAAAACAAGTACCAGTAAATACTGGAGTTAGTGATGGG	chrX:10500880-10500920	GTCGAATATACGTCTGTCGA
chrX_C4	CGATTACCCGATAGGACGAAAAGGTGATCTTGACAGGGGATAATGAATTCTAGTGATGTAGTCGAATATACGTCTGTCGA	CGATTACCCGATAGGACGAA	AAGGTGATCTTGACAGGGGATAATGAATTCTAGTGATGTA	chrX:10500922-10500962	GTCGAATATACGTCTGTCGA
chrX_C4	CGATTACCCGATAGGACGAATAGGAGACATATAGAGGGTGTAAAGCTAGTGAAAGATAAGGTCGAATATACGTCTGTCGA	CGATTACCCGATAGGACGAA	TAGGAGACATATAGAGGGTGTAAAGCTAGTGAAAGATAAG	chrX:10500964-10501004	GTCGAATATACGTCTGTCGA
chrX_C4	CGATTACCCGATAGGACGAACTATTTCACTAGGTTTATTTGTATGAGTCCATTGTGGCATGTCGAATATACGTCTGTCGA	CGATTACCCGATAGGACGAA	CTATTTCACTAGGTTTATTTGTATGAGTCCATTGTGGCAT	chrX:10501006-10501046	GTCGAATATACGTCTGTCGA
chrX_C4	CGATTACCCGATAGGACGAACTCCCCAGTGATTGTGGGTTAGTTCTCATTCTGGTTTGGGGTCGAATATACGTCTGTCGA	CGATTACCCGATAGGACGAA	CTCCCCAGTGATTGTGGGTTAGTTCTCATTCTGGTTTGGG	chrX:10501048-10501088	GTCGAATATACGTCTGTCGA
chrX_C4	CGATTACCCGATAGGACGAACCCCTCCCAAAGGAATCTTTATGGTTTGCTTCCTGTACAAGTCGAATATACGTCTGTCGA	CGATTACCCGATAGGACGAA	CCCCTCCCAAAGGAATCTTTATGGTTTGCTTCCTGTACAA	chrX:10501096-10501136	GTCGAATATACGTCTGTCGA
chrX_C4	CGATTACCCGATAGGACGAAAGGCCAGTTAGACAGTTCTTCTGAAGCTACAGTGTCTCAGGTCGAATATACGTCTGTCGA	CGATTACCCGATAGGACGAA	AGGCCAGTTAGACAGTTCTTCTGAAGCTACAGTGTCTCAG	chrX:10501138-10501178	GTCGAATATACGTCTGTCGA
chrX_C4	CGATTACCCGATAGGACGAATACTAGATCAAAATGATCAATAACCAGTGAGCATCTTTGGGTCGAATATACGTCTGTCGA	CGATTACCCGATAGGACGAA	TACTAGATCAAAATGATCAATAACCAGTGAGCATCTTTGG	chrX:10501182-10501222	GTCGAATATACGTCTGTCGA
chrX_C4	CGATTACCCGATAGGACGAATAGGATGGTCTTCACTCCTTTGCTGTATGCCTTGGAAAATGTCGAATATACGTCTGTCGA	CGATTACCCGATAGGACGAA	TAGGATGGTCTTCACTCCTTTGCTGTATGCCTTGGAAAAT	chrX:10501224-10501264	GTCGAATATACGTCTGTCGA
chrX_C4	CGATTACCCGATAGGACGAAGTATTTGCTATCTCTTCCTTTATAGAAATCTGTGAATCCCGTCGAATATACGTCTGTCGA	CGATTACCCGATAGGACGAA	GTATTTGCTATCTCTTCCTTTATAGAAATCTGTGAATCCC	chrX:10501269-10501309	GTCGAATATACGTCTGTCGA
chrX_C4	CGATTACCCGATAGGACGAAGCTACAAACACACACATGTGTATACCATATATTTCCTTACGTCGAATATACGTCTGTCGA	CGATTACCCGATAGGACGAA	GCTACAAACACACACATGTGTATACCATATATTTCCTTAC	chrX:10501409-10501449	GTCGAATATACGTCTGTCGA
chrX_C4	CGATTACCCGATAGGACGAAACAAATTCAAGATAGACTTTACCCTGTTAGCTTCTAGGTGGTCGAATATACGTCTGTCGA	CGATTACCCGATAGGACGAA	ACAAATTCAAGATAGACTTTACCCTGTTAGCTTCTAGGTG	chrX:10501548-10501588	GTCGAATATACGTCTGTCGA
chrX_C4	CGATTACCCGATAGGACGAATTATTTGGCAGTTTGGAAGGGGATGGTATTTTCTCCTTGAGTCGAATATACGTCTGTCGA	CGATTACCCGATAGGACGAA	TTATTTGGCAGTTTGGAAGGGGATGGTATTTTCTCCTTGA	chrX:10501590-10501630	GTCGAATATACGTCTGTCGA
chrX_C4	CGATTACCCGATAGGACGAATTTTGTCTCCAAGTGGACTATTATGACTTGAATGGAGAAAGTCGAATATACGTCTGTCGA	CGATTACCCGATAGGACGAA	TTTTGTCTCCAAGTGGACTATTATGACTTGAATGGAGAAA	chrX:10501639-10501679	GTCGAATATACGTCTGTCGA
chrX_C4	CGATTACCCGATAGGACGAAGGCTGTGTTGTCCATATGGATCAAACATGAGAATCATGACGTCGAATATACGTCTGTCGA	CGATTACCCGATAGGACGAA	GGCTGTGTTGTCCATATGGATCAAACATGAGAATCATGAC	chrX:10501681-10501721	GTCGAATATACGTCTGTCGA
chrX_C4	CGATTACCCGATAGGACGAACTGGCAGCAACAGTATCTACTCTACGAAGATCACTGGATTGTCGAATATACGTCTGTCGA	CGATTACCCGATAGGACGAA	CTGGCAGCAACAGTATCTACTCTACGAAGATCACTGGATT	chrX:10501723-10501763	GTCGAATATACGTCTGTCGA
chrX_C4	CGATTACCCGATAGGACGAAATCAAGGTGGTGATATTGCTATGAACCCAACTACTGCTGTGTCGAATATACGTCTGTCGA	CGATTACCCGATAGGACGAA	ATCAAGGTGGTGATATTGCTATGAACCCAACTACTGCTGT	chrX:10501765-10501805	GTCGAATATACGTCTGTCGA
chrX_C4	CGATTACCCGATAGGACGAAGATTATTGAGCAGTTAGTAAAGGCAAGGATAAGGTTGACCGTCGAATATACGTCTGTCGA	CGATTACCCGATAGGACGAA	GATTATTGAGCAGTTAGTAAAGGCAAGGATAAGGTTGACC	chrX:10501807-10501847	GTCGAATATACGTCTGTCGA
chrX_C4	CGATTACCCGATAGGACGAATTAACATGTGTTATCTTGTTTAGTCCTCATGCAAACTTGCGTCGAATATACGTCTGTCGA	CGATTACCCGATAGGACGAA	TTAACATGTGTTATCTTGTTTAGTCCTCATGCAAACTTGC	chrX:10501849-10501889	GTCGAATATACGTCTGTCGA
chrX_C4	CGATTACCCGATAGGACGAAAGGTAGTAATTACTGTTCCTTATTTTGAGAGGAAGTCCCCGTCGAATATACGTCTGTCGA	CGATTACCCGATAGGACGAA	AGGTAGTAATTACTGTTCCTTATTTTGAGAGGAAGTCCCC	chrX:10501891-10501931	GTCGAATATACGTCTGTCGA
chrX_C4	CGATTACCCGATAGGACGAAACGTCCAGAGTGTGGCCCACAGTCATGCCTGAAAGGGGTTGTCGAATATACGTCTGTCGA	CGATTACCCGATAGGACGAA	ACGTCCAGAGTGTGGCCCACAGTCATGCCTGAAAGGGGTT	chrX:10501933-10501973	GTCGAATATACGTCTGTCGA
chrX_C4	CGATTACCCGATAGGACGAATGTTATAGACCTCTTCACCCTTCTTGGGCCCAGTGTCCTGGTCGAATATACGTCTGTCGA	CGATTACCCGATAGGACGAA	TGTTATAGACCTCTTCACCCTTCTTGGGCCCAGTGTCCTG	chrX:10501975-10502015	GTCGAATATACGTCTGTCGA
chrX_C4	CGATTACCCGATAGGACGAATCCAGAAGCACATTTCTCCAGGGTAAGCCTTTGGAGATGAGTCGAATATACGTCTGTCGA	CGATTACCCGATAGGACGAA	TCCAGAAGCACATTTCTCCAGGGTAAGCCTTTGGAGATGA	chrX:10502017-10502057	GTCGAATATACGTCTGTCGA
chrX_C4	CGATTACCCGATAGGACGAAAGAGGTTACTCTTTGAGTCCTTTCTTAGTCATCAATTTGCGTCGAATATACGTCTGTCGA	CGATTACCCGATAGGACGAA	AGAGGTTACTCTTTGAGTCCTTTCTTAGTCATCAATTTGC	chrX:10502059-10502099	GTCGAATATACGTCTGTCGA
chrX_C4	CGATTACCCGATAGGACGAACCTGTACAAGAAAGAAATCTTCTAATTTCCAGAATGATCCGTCGAATATACGTCTGTCGA	CGATTACCCGATAGGACGAA	CCTGTACAAGAAAGAAATCTTCTAATTTCCAGAATGATCC	chrX:10502151-10502191	GTCGAATATACGTCTGTCGA
chrX_C4	CGATTACCCGATAGGACGAAGTTTACAGCTCTAGTGTCTCTGGTTATTTTGGTTTATAGTGTCGAATATACGTCTGTCGA	CGATTACCCGATAGGACGAA	GTTTACAGCTCTAGTGTCTCTGGTTATTTTGGTTTATAGT	chrX:10502193-10502233	GTCGAATATACGTCTGTCGA
chrX_C4	CGATTACCCGATAGGACGAATTCTGTCCTTATAGCTCCAAGCTTCAGTTTTCCTAGTAAGGTCGAATATACGTCTGTCGA	CGATTACCCGATAGGACGAA	TTCTGTCCTTATAGCTCCAAGCTTCAGTTTTCCTAGTAAG	chrX:10502254-10502294	GTCGAATATACGTCTGTCGA
chrX_C4	CGATTACCCGATAGGACGAATAACAATACTTTGCAGACTGGGGATACAGGATAAGGAACCGTCGAATATACGTCTGTCGA	CGATTACCCGATAGGACGAA	TAACAATACTTTGCAGACTGGGGATACAGGATAAGGAACC	chrX:10502296-10502336	GTCGAATATACGTCTGTCGA
chrX_C4	CGATTACCCGATAGGACGAAAATAGGAGATACACTCTTCTTGTCAACAACTAAGCAACAAGTCGAATATACGTCTGTCGA	CGATTACCCGATAGGACGAA	AATAGGAGATACACTCTTCTTGTCAACAACTAAGCAACAA	chrX:10502338-10502378	GTCGAATATACGTCTGTCGA
chrX_C4	CGATTACCCGATAGGACGAACCTGCTTTTCTTTCAAAAGTCTGAGTCTATAACGAATCTTGTCGAATATACGTCTGTCGA	CGATTACCCGATAGGACGAA	CCTGCTTTTCTTTCAAAAGTCTGAGTCTATAACGAATCTT	chrX:10502380-10502420	GTCGAATATACGTCTGTCGA
chrX_C4	CGATTACCCGATAGGACGAAAGTTCATGGTTGATGTAAGTTAGATAAGGCATCAAAAGTCGTCGAATATACGTCTGTCGA	CGATTACCCGATAGGACGAA	AGTTCATGGTTGATGTAAGTTAGATAAGGCATCAAAAGTC	chrX:10502436-10502476	GTCGAATATACGTCTGTCGA
chrX_C4	CGATTACCCGATAGGACGAAGAGAATTTCCACTGGGTAGATGATACTCTGACTGTCATTTGTCGAATATACGTCTGTCGA	CGATTACCCGATAGGACGAA	GAGAATTTCCACTGGGTAGATGATACTCTGACTGTCATTT	chrX:10502478-10502518	GTCGAATATACGTCTGTCGA
chrX_C4	CGATTACCCGATAGGACGAATCTTATGCCTTAAAGATTCTAAATTGTTGCTCCAAAGCACGTCGAATATACGTCTGTCGA	CGATTACCCGATAGGACGAA	TCTTATGCCTTAAAGATTCTAAATTGTTGCTCCAAAGCAC	chrX:10502530-10502570	GTCGAATATACGTCTGTCGA
chrX_C4	CGATTACCCGATAGGACGAACCCACTGCTATAAAATATAGTCGACATATGAAACTGATTCGTCGAATATACGTCTGTCGA	CGATTACCCGATAGGACGAA	CCCACTGCTATAAAATATAGTCGACATATGAAACTGATTC	chrX:10502585-10502625	GTCGAATATACGTCTGTCGA
chrX_C4	CGATTACCCGATAGGACGAAATGGCAACAAGCCCCAGACCACTTTGAACAGCCGGAAACCGTCGAATATACGTCTGTCGA	CGATTACCCGATAGGACGAA	ATGGCAACAAGCCCCAGACCACTTTGAACAGCCGGAAACC	chrX:10502627-10502667	GTCGAATATACGTCTGTCGA
chrX_C4	CGATTACCCGATAGGACGAACCCCTGCCTTTGCCCTGAAGAGTGCTAAAGGCAGTGGGAAGTCGAATATACGTCTGTCGA	CGATTACCCGATAGGACGAA	CCCCTGCCTTTGCCCTGAAGAGTGCTAAAGGCAGTGGGAA	chrX:10502701-10502741	GTCGAATATACGTCTGTCGA
chrX_C4	CGATTACCCGATAGGACGAAGTCAGGCATTTTCCTTTGGAGCTGACACTAGCTAAGCTGTGTCGAATATACGTCTGTCGA	CGATTACCCGATAGGACGAA	GTCAGGCATTTTCCTTTGGAGCTGACACTAGCTAAGCTGT	chrX:10502743-10502783	GTCGAATATACGTCTGTCGA
chrX_C4	CGATTACCCGATAGGACGAATCTAATCCACACATGGACACACAGATAAGGCTCATTTGCAGTCGAATATACGTCTGTCGA	CGATTACCCGATAGGACGAA	TCTAATCCACACATGGACACACAGATAAGGCTCATTTGCA	chrX:10502785-10502825	GTCGAATATACGTCTGTCGA
chrX_C4	CGATTACCCGATAGGACGAAGCTGCCAACTCAGGCTTTGCCTGTTGATGTGATCTTGTTTGTCGAATATACGTCTGTCGA	CGATTACCCGATAGGACGAA	GCTGCCAACTCAGGCTTTGCCTGTTGATGTGATCTTGTTT	chrX:10502827-10502867	GTCGAATATACGTCTGTCGA
chrX_C4	CGATTACCCGATAGGACGAAGGGGAAAACAAACCTGACCATTCCTAATTTCTGTGAATAGGTCGAATATACGTCTGTCGA	CGATTACCCGATAGGACGAA	GGGGAAAACAAACCTGACCATTCCTAATTTCTGTGAATAG	chrX:10502891-10502931	GTCGAATATACGTCTGTCGA
chrX_C4	CGATTACCCGATAGGACGAAACAGGAATTCTTGCCTGTATAAGGTTAATTGGCTGTGTTAGTCGAATATACGTCTGTCGA	CGATTACCCGATAGGACGAA	ACAGGAATTCTTGCCTGTATAAGGTTAATTGGCTGTGTTA	chrX:10502933-10502973	GTCGAATATACGTCTGTCGA
chrX_C4	CGATTACCCGATAGGACGAATCTGATGAGACGAGCTTAAGGGACTGGAGAACACTGGATAGTCGAATATACGTCTGTCGA	CGATTACCCGATAGGACGAA	TCTGATGAGACGAGCTTAAGGGACTGGAGAACACTGGATA	chrX:10502975-10503015	GTCGAATATACGTCTGTCGA
chrX_C4	CGATTACCCGATAGGACGAAGTGGATCATTGAGCATACTGGCTGTGAGCCCAACTGAAAAAGTACAGTGCTCCTATGCGA	CGATTACCCGATAGGACGAA	GTGGATCATTGAGCATACTGGCTGTGAGCCCAACTGAAAA	chrX:11498709-11498749	AGTACAGTGCTCCTATGCGA
chrX_C4	CGATTACCCGATAGGACGAAGATCCTGCCTCAAAGGAATAGTGACAGAGAGGAAGATGTTAGTACAGTGCTCCTATGCGA	CGATTACCCGATAGGACGAA	GATCCTGCCTCAAAGGAATAGTGACAGAGAGGAAGATGTT	chrX:11498765-11498805	AGTACAGTGCTCCTATGCGA
chrX_C4	CGATTACCCGATAGGACGAATGCCCTTCTCTGACCTTAATGCTTGTACACTTATAATATAAGTACAGTGCTCCTATGCGA	CGATTACCCGATAGGACGAA	TGCCCTTCTCTGACCTTAATGCTTGTACACTTATAATATA	chrX:11498807-11498847	AGTACAGTGCTCCTATGCGA
chrX_C4	CGATTACCCGATAGGACGAAAAAACCAGTCTGTTTCATTCTTCTATGTGCATCAGGGTGCAGTACAGTGCTCCTATGCGA	CGATTACCCGATAGGACGAA	AAAACCAGTCTGTTTCATTCTTCTATGTGCATCAGGGTGC	chrX:11498954-11498994	AGTACAGTGCTCCTATGCGA
chrX_C4	CGATTACCCGATAGGACGAATGCTGAAGCTGAGCAATGCCAACCAGTACACCTGTCATCTAGTACAGTGCTCCTATGCGA	CGATTACCCGATAGGACGAA	TGCTGAAGCTGAGCAATGCCAACCAGTACACCTGTCATCT	chrX:11498996-11499036	AGTACAGTGCTCCTATGCGA
chrX_C4	CGATTACCCGATAGGACGAATGACACAGCGCGGTATGCTGTGTACCTCCCTGGGGTATGAAGTACAGTGCTCCTATGCGA	CGATTACCCGATAGGACGAA	TGACACAGCGCGGTATGCTGTGTACCTCCCTGGGGTATGA	chrX:11499038-11499078	AGTACAGTGCTCCTATGCGA
chrX_C4	CGATTACCCGATAGGACGAAGGGGAGGATCCTTTAGCTCATGTCAATCAAGGTATTTCCCAGTACAGTGCTCCTATGCGA	CGATTACCCGATAGGACGAA	GGGGAGGATCCTTTAGCTCATGTCAATCAAGGTATTTCCC	chrX:11499106-11499146	AGTACAGTGCTCCTATGCGA
chrX_C4	CGATTACCCGATAGGACGAAAAGGCATTTATTTGATGGTCCTTGCCAAGTGACACACAGTAGTACAGTGCTCCTATGCGA	CGATTACCCGATAGGACGAA	AAGGCATTTATTTGATGGTCCTTGCCAAGTGACACACAGT	chrX:11499148-11499188	AGTACAGTGCTCCTATGCGA
chrX_C4	CGATTACCCGATAGGACGAAACAATGACGTGAATGTGCCCAGGGAAGGGGAGCACAATTGAGTACAGTGCTCCTATGCGA	CGATTACCCGATAGGACGAA	ACAATGACGTGAATGTGCCCAGGGAAGGGGAGCACAATTG	chrX:11499190-11499230	AGTACAGTGCTCCTATGCGA
chrX_C4	CGATTACCCGATAGGACGAAGGCCAGGACAGCATCTGCATCTTCTTGAGTGGATCAGCATAGTACAGTGCTCCTATGCGA	CGATTACCCGATAGGACGAA	GGCCAGGACAGCATCTGCATCTTCTTGAGTGGATCAGCAT	chrX:11499232-11499272	AGTACAGTGCTCCTATGCGA
chrX_C4	CGATTACCCGATAGGACGAACAGTACTGGCTTCCCACACAAGCAGGCCTTGGGTGGAGCAAGTACAGTGCTCCTATGCGA	CGATTACCCGATAGGACGAA	CAGTACTGGCTTCCCACACAAGCAGGCCTTGGGTGGAGCA	chrX:11499274-11499314	AGTACAGTGCTCCTATGCGA
chrX_C4	CGATTACCCGATAGGACGAACTGGTGCTGGCATTGTTAGAACATGATGGCTGTGTACAGCAGTACAGTGCTCCTATGCGA	CGATTACCCGATAGGACGAA	CTGGTGCTGGCATTGTTAGAACATGATGGCTGTGTACAGC	chrX:11499316-11499356	AGTACAGTGCTCCTATGCGA
chrX_C4	CGATTACCCGATAGGACGAATGAAAGCTGATATCCATAGGCAGCTTCATGGATATTCCTAAGTACAGTGCTCCTATGCGA	CGATTACCCGATAGGACGAA	TGAAAGCTGATATCCATAGGCAGCTTCATGGATATTCCTA	chrX:11499358-11499398	AGTACAGTGCTCCTATGCGA
chrX_C4	CGATTACCCGATAGGACGAACAGGCCAGACTTATGGCAGAGATGGGCAAGATATTTGGCCAGTACAGTGCTCCTATGCGA	CGATTACCCGATAGGACGAA	CAGGCCAGACTTATGGCAGAGATGGGCAAGATATTTGGCC	chrX:11499400-11499440	AGTACAGTGCTCCTATGCGA
chrX_C4	CGATTACCCGATAGGACGAATTTTCCTGATTGTATTAGTAGGCACTTTCCTTAGAAAGGAAGTACAGTGCTCCTATGCGA	CGATTACCCGATAGGACGAA	TTTTCCTGATTGTATTAGTAGGCACTTTCCTTAGAAAGGA	chrX:11499470-11499510	AGTACAGTGCTCCTATGCGA
chrX_C4	CGATTACCCGATAGGACGAAATACATACATACATAGGCAGGAAGGCAATAATAAGGGATAAGTACAGTGCTCCTATGCGA	CGATTACCCGATAGGACGAA	ATACATACATACATAGGCAGGAAGGCAATAATAAGGGATA	chrX:11499584-11499624	AGTACAGTGCTCCTATGCGA
chrX_C4	CGATTACCCGATAGGACGAATCTGATAATGTATGGGATTATAAAGTTGACCTATCCTACCAGTACAGTGCTCCTATGCGA	CGATTACCCGATAGGACGAA	TCTGATAATGTATGGGATTATAAAGTTGACCTATCCTACC	chrX:11499665-11499705	AGTACAGTGCTCCTATGCGA
chrX_C4	CGATTACCCGATAGGACGAAGTGAAATCTAGAGATCCATGAAAATCAGTGGTATAGTCAAAGTACAGTGCTCCTATGCGA	CGATTACCCGATAGGACGAA	GTGAAATCTAGAGATCCATGAAAATCAGTGGTATAGTCAA	chrX:11499707-11499747	AGTACAGTGCTCCTATGCGA
chrX_C4	CGATTACCCGATAGGACGAAACCTAATAATTGGAAAGGAGGTGGCTGGTCTAGACTTCAAAGTACAGTGCTCCTATGCGA	CGATTACCCGATAGGACGAA	ACCTAATAATTGGAAAGGAGGTGGCTGGTCTAGACTTCAA	chrX:11499749-11499789	AGTACAGTGCTCCTATGCGA
chrX_C4	CGATTACCCGATAGGACGAACCCCAAGAACCAGAAACACTGCGGTCAGGAGAATCTTCCTAGTACAGTGCTCCTATGCGA	CGATTACCCGATAGGACGAA	CCCCAAGAACCAGAAACACTGCGGTCAGGAGAATCTTCCT	chrX:11499804-11499844	AGTACAGTGCTCCTATGCGA
chrX_C4	CGATTACCCGATAGGACGAAACCAGCTCAACGGTTAGGCAGAGGGCATTTAAATCCACCTAGTACAGTGCTCCTATGCGA	CGATTACCCGATAGGACGAA	ACCAGCTCAACGGTTAGGCAGAGGGCATTTAAATCCACCT	chrX:11499846-11499886	AGTACAGTGCTCCTATGCGA
chrX_C4	CGATTACCCGATAGGACGAAAATCTGTCTTTTGGATTCTTCAACCCCTCAGTGAATGAGAAGTACAGTGCTCCTATGCGA	CGATTACCCGATAGGACGAA	AATCTGTCTTTTGGATTCTTCAACCCCTCAGTGAATGAGA	chrX:11499888-11499928	AGTACAGTGCTCCTATGCGA
chrX_C4	CGATTACCCGATAGGACGAACCCCAGTTTAGGGAGGATCCACTGCTGTACCCAGTCTATCAGTACAGTGCTCCTATGCGA	CGATTACCCGATAGGACGAA	CCCCAGTTTAGGGAGGATCCACTGCTGTACCCAGTCTATC	chrX:11499936-11499976	AGTACAGTGCTCCTATGCGA
chrX_C4	CGATTACCCGATAGGACGAATTCAAATGCTGGTCTCTTCTCTCCCATCAACATCCTTATAAGTACAGTGCTCCTATGCGA	CGATTACCCGATAGGACGAA	TTCAAATGCTGGTCTCTTCTCTCCCATCAACATCCTTATA	chrX:11499978-11500018	AGTACAGTGCTCCTATGCGA
chrX_C4	CGATTACCCGATAGGACGAACATGCCCAGAAATCACAAGTCTCACCTCTCTGAGCCGACCAGTACAGTGCTCCTATGCGA	CGATTACCCGATAGGACGAA	CATGCCCAGAAATCACAAGTCTCACCTCTCTGAGCCGACC	chrX:11500020-11500060	AGTACAGTGCTCCTATGCGA
chrX_C4	CGATTACCCGATAGGACGAAAGTCTGATCAAGTTGATGCATAAATGAACCATCATGCTTGAGTACAGTGCTCCTATGCGA	CGATTACCCGATAGGACGAA	AGTCTGATCAAGTTGATGCATAAATGAACCATCATGCTTG	chrX:11500062-11500102	AGTACAGTGCTCCTATGCGA
chrX_C4	CGATTACCCGATAGGACGAAAAGCTACTTTGGCAGTGAGAAGGAAGAGGCGAGGAGCTTTAGTACAGTGCTCCTATGCGA	CGATTACCCGATAGGACGAA	AAGCTACTTTGGCAGTGAGAAGGAAGAGGCGAGGAGCTTT	chrX:11500104-11500144	AGTACAGTGCTCCTATGCGA
chrX_C4	CGATTACCCGATAGGACGAATGGCAATCGCTGGCTATCCTGGGCATCAGTCACATCTGGAAGTACAGTGCTCCTATGCGA	CGATTACCCGATAGGACGAA	TGGCAATCGCTGGCTATCCTGGGCATCAGTCACATCTGGA	chrX:11500146-11500186	AGTACAGTGCTCCTATGCGA
chrX_C4	CGATTACCCGATAGGACGAAGTAAAGACAGAACGGTGTTTACTTCTTTACATCTCTCAAAAGTACAGTGCTCCTATGCGA	CGATTACCCGATAGGACGAA	GTAAAGACAGAACGGTGTTTACTTCTTTACATCTCTCAAA	chrX:11500188-11500228	AGTACAGTGCTCCTATGCGA
chrX_C4	CGATTACCCGATAGGACGAAGACGAAGGCATTCCTGAGCTAATCTTGGTCTGAAAAGGCCAGTACAGTGCTCCTATGCGA	CGATTACCCGATAGGACGAA	GACGAAGGCATTCCTGAGCTAATCTTGGTCTGAAAAGGCC	chrX:11500230-11500270	AGTACAGTGCTCCTATGCGA
chrX_C4	CGATTACCCGATAGGACGAAGGGACCCTACCATCTTAATTGGAAGAAATAAAGCAAGGTAAGTACAGTGCTCCTATGCGA	CGATTACCCGATAGGACGAA	GGGACCCTACCATCTTAATTGGAAGAAATAAAGCAAGGTA	chrX:11500272-11500312	AGTACAGTGCTCCTATGCGA
chrX_C4	CGATTACCCGATAGGACGAAATTCAGGTAAATACCAACACCTGTCAAAAGATCAGTCATGAGTACAGTGCTCCTATGCGA	CGATTACCCGATAGGACGAA	ATTCAGGTAAATACCAACACCTGTCAAAAGATCAGTCATG	chrX:11500314-11500354	AGTACAGTGCTCCTATGCGA
chrX_C4	CGATTACCCGATAGGACGAATAGACCAGAGGAGGACTATAGGCCCCAAGGACTCATACTGAGTACAGTGCTCCTATGCGA	CGATTACCCGATAGGACGAA	TAGACCAGAGGAGGACTATAGGCCCCAAGGACTCATACTG	chrX:11500356-11500396	AGTACAGTGCTCCTATGCGA
chrX_C4	CGATTACCCGATAGGACGAATTCTGAAAAGTATCTAGAGGACACTCTTTATGTTATAGGCAGTACAGTGCTCCTATGCGA	CGATTACCCGATAGGACGAA	TTCTGAAAAGTATCTAGAGGACACTCTTTATGTTATAGGC	chrX:11500401-11500441	AGTACAGTGCTCCTATGCGA
chrX_C4	CGATTACCCGATAGGACGAATTTACTCATTCATATTGAGTACCAATCATGTACTAAGCGCAGTACAGTGCTCCTATGCGA	CGATTACCCGATAGGACGAA	TTTACTCATTCATATTGAGTACCAATCATGTACTAAGCGC	chrX:11500461-11500501	AGTACAGTGCTCCTATGCGA
chrX_C4	CGATTACCCGATAGGACGAATTTTCTGAGAGAGGCAGGGGCAGGGTAAGAGTCAGTGGCCAGTACAGTGCTCCTATGCGA	CGATTACCCGATAGGACGAA	TTTTCTGAGAGAGGCAGGGGCAGGGTAAGAGTCAGTGGCC	chrX:11500508-11500548	AGTACAGTGCTCCTATGCGA
chrX_C4	CGATTACCCGATAGGACGAACTAGCTGCAGAGAACAGAATCCACTCAAGCTATCAGAGCCAGTACAGTGCTCCTATGCGA	CGATTACCCGATAGGACGAA	CTAGCTGCAGAGAACAGAATCCACTCAAGCTATCAGAGCC	chrX:11500550-11500590	AGTACAGTGCTCCTATGCGA
chrX_C4	CGATTACCCGATAGGACGAAAGGTATTAATTACAGAATCTTCAGTAGTACTGTACAGCTGAGTACAGTGCTCCTATGCGA	CGATTACCCGATAGGACGAA	AGGTATTAATTACAGAATCTTCAGTAGTACTGTACAGCTG	chrX:11500592-11500632	AGTACAGTGCTCCTATGCGA
chrX_C4	CGATTACCCGATAGGACGAATCCTCACACTGCAGTGGGATTGGGCTGCTAATGGAGGCTCAGTACAGTGCTCCTATGCGA	CGATTACCCGATAGGACGAA	TCCTCACACTGCAGTGGGATTGGGCTGCTAATGGAGGCTC	chrX:11500634-11500674	AGTACAGTGCTCCTATGCGA
chrX_C4	CGATTACCCGATAGGACGAACACTGCTTAAAGACTCCCCTATGGTCAAGCAGCCACTATCAGTACAGTGCTCCTATGCGA	CGATTACCCGATAGGACGAA	CACTGCTTAAAGACTCCCCTATGGTCAAGCAGCCACTATC	chrX:11500676-11500716	AGTACAGTGCTCCTATGCGA
chrX_C4	CGATTACCCGATAGGACGAATGACCATTAGCCACACTGTCTCTGTTAAGTCCACCCAACAAGTACAGTGCTCCTATGCGA	CGATTACCCGATAGGACGAA	TGACCATTAGCCACACTGTCTCTGTTAAGTCCACCCAACA	chrX:11500718-11500758	AGTACAGTGCTCCTATGCGA
chrX_C4	CGATTACCCGATAGGACGAAACACTTAATTACTCCACACAGTGGAGTGATTCCAGTCAACAGTACAGTGCTCCTATGCGA	CGATTACCCGATAGGACGAA	ACACTTAATTACTCCACACAGTGGAGTGATTCCAGTCAAC	chrX:11500760-11500800	AGTACAGTGCTCCTATGCGA
chrX_C4	CGATTACCCGATAGGACGAACCATGTGATTTAGCCCCTGAGGACCACTGGAGTCACCAACAGTACAGTGCTCCTATGCGA	CGATTACCCGATAGGACGAA	CCATGTGATTTAGCCCCTGAGGACCACTGGAGTCACCAAC	chrX:11500802-11500842	AGTACAGTGCTCCTATGCGA
chrX_C4	CGATTACCCGATAGGACGAAAGTCCACATGTTGCCTAAGACAGTTTTCTGTATTGTTCACAGTACAGTGCTCCTATGCGA	CGATTACCCGATAGGACGAA	AGTCCACATGTTGCCTAAGACAGTTTTCTGTATTGTTCAC	chrX:11500844-11500884	AGTACAGTGCTCCTATGCGA
chrX_C4	CGATTACCCGATAGGACGAAAAAAGGAAAGTAGATGTCTAGTTATCTAACTGACCACAGAAGTACAGTGCTCCTATGCGA	CGATTACCCGATAGGACGAA	AAAAGGAAAGTAGATGTCTAGTTATCTAACTGACCACAGA	chrX:11500931-11500971	AGTACAGTGCTCCTATGCGA
chrX_C4	CGATTACCCGATAGGACGAATGCCTAGAGGCTGCAGCAGGGGAGGTGATGAGGGAGCGCTAGTACAGTGCTCCTATGCGA	CGATTACCCGATAGGACGAA	TGCCTAGAGGCTGCAGCAGGGGAGGTGATGAGGGAGCGCT	chrX:11500973-11501013	AGTACAGTGCTCCTATGCGA
chrX_C4	CGATTACCCGATAGGACGAAGGGTGTGGATGAAGAAATACTTGCCTGGAAAATGGATGAAAGTACAGTGCTCCTATGCGA	CGATTACCCGATAGGACGAA	GGGTGTGGATGAAGAAATACTTGCCTGGAAAATGGATGAA	chrX:11501015-11501055	AGTACAGTGCTCCTATGCGA
chrX_C4	CGATTACCCGATAGGACGAACTTCCATAGAGCCTATGGCATGTCCACTAGCCTGTTTCCCAGTACAGTGCTCCTATGCGA	CGATTACCCGATAGGACGAA	CTTCCATAGAGCCTATGGCATGTCCACTAGCCTGTTTCCC	chrX:11501057-11501097	AGTACAGTGCTCCTATGCGA
chrX_C4	CGATTACCCGATAGGACGAAGCTATACATGCTTTGTGATGCTTGTCATTGTCTTACAGGTAGTACAGTGCTCCTATGCGA	CGATTACCCGATAGGACGAA	GCTATACATGCTTTGTGATGCTTGTCATTGTCTTACAGGT	chrX:11501282-11501322	AGTACAGTGCTCCTATGCGA
chrX_C4	CGATTACCCGATAGGACGAATAGCTCTTTGGATCTAAGACCAAAGTGGAGTGGAAACGCAAGTACAGTGCTCCTATGCGA	CGATTACCCGATAGGACGAA	TAGCTCTTTGGATCTAAGACCAAAGTGGAGTGGAAACGCA	chrX:11501354-11501394	AGTACAGTGCTCCTATGCGA
chrX_C4	CGATTACCCGATAGGACGAAAAAATTTTAACCAGTGCTGAGTGCTTGGCAGTTTTGAGCTAGTACAGTGCTCCTATGCGA	CGATTACCCGATAGGACGAA	AAAATTTTAACCAGTGCTGAGTGCTTGGCAGTTTTGAGCT	chrX:11501427-11501467	AGTACAGTGCTCCTATGCGA
chrX_C4	CGATTACCCGATAGGACGAAATAGTAGTGTGCCTGTTTCAGATGTGCTAACTGAGGCATGAGTACAGTGCTCCTATGCGA	CGATTACCCGATAGGACGAA	ATAGTAGTGTGCCTGTTTCAGATGTGCTAACTGAGGCATG	chrX:11501469-11501509	AGTACAGTGCTCCTATGCGA
chrX_C4	CGATTACCCGATAGGACGAACAATTAAATAAAAGACACCCCACCCCATATAGGCCAGTAGAGTACAGTGCTCCTATGCGA	CGATTACCCGATAGGACGAA	CAATTAAATAAAAGACACCCCACCCCATATAGGCCAGTAG	chrX:11501512-11501552	AGTACAGTGCTCCTATGCGA
chrX_C4	CGATTACCCGATAGGACGAAATCAAAGTTTCCAACAGAGTCTATATTGGGTTTAGCATGTAGTACAGTGCTCCTATGCGA	CGATTACCCGATAGGACGAA	ATCAAAGTTTCCAACAGAGTCTATATTGGGTTTAGCATGT	chrX:11501554-11501594	AGTACAGTGCTCCTATGCGA
chrX_C4	CGATTACCCGATAGGACGAACCCCATGCTTTACTACCCTGCAACAAAGACTTGAATGTCAAGTACAGTGCTCCTATGCGA	CGATTACCCGATAGGACGAA	CCCCATGCTTTACTACCCTGCAACAAAGACTTGAATGTCA	chrX:11501606-11501646	AGTACAGTGCTCCTATGCGA
chrX_C4	CGATTACCCGATAGGACGAAGAAGCTTATGGAAAGTGTCATTGAGTAAATAGAAATAGGCAGTACAGTGCTCCTATGCGA	CGATTACCCGATAGGACGAA	GAAGCTTATGGAAAGTGTCATTGAGTAAATAGAAATAGGC	chrX:11501652-11501692	AGTACAGTGCTCCTATGCGA
chrX_C4	CGATTACCCGATAGGACGAAGACTAGAAATGCACTAAAGGATTTTGGAACAAGACTACATAGTACAGTGCTCCTATGCGA	CGATTACCCGATAGGACGAA	GACTAGAAATGCACTAAAGGATTTTGGAACAAGACTACAT	chrX:11501694-11501734	AGTACAGTGCTCCTATGCGA
chrX_C4	CGATTACCCGATAGGACGAAATGCCGCCTCTCTTTCCCCGTGTTCTCCTTGCCAGAGCACAGTACAGTGCTCCTATGCGA	CGATTACCCGATAGGACGAA	ATGCCGCCTCTCTTTCCCCGTGTTCTCCTTGCCAGAGCAC	chrX:11501736-11501776	AGTACAGTGCTCCTATGCGA
chrX_C4	CGATTACCCGATAGGACGAAAAATTTAAAGATTACAGTACCTGTAGCTCTATTCCTCAGGAGTACAGTGCTCCTATGCGA	CGATTACCCGATAGGACGAA	AAATTTAAAGATTACAGTACCTGTAGCTCTATTCCTCAGG	chrX:11501783-11501823	AGTACAGTGCTCCTATGCGA
chrX_C4	CGATTACCCGATAGGACGAATTATGTGGCCGTGTAGCAAGCTAGACATGGCAAGAAGATAAGTACAGTGCTCCTATGCGA	CGATTACCCGATAGGACGAA	TTATGTGGCCGTGTAGCAAGCTAGACATGGCAAGAAGATA	chrX:11501825-11501865	AGTACAGTGCTCCTATGCGA
chrX_C4	CGATTACCCGATAGGACGAAATAACAGTATTGGTGGGTGGGACCTTTGGGAGGTGATCAAAGTACAGTGCTCCTATGCGA	CGATTACCCGATAGGACGAA	ATAACAGTATTGGTGGGTGGGACCTTTGGGAGGTGATCAA	chrX:11501871-11501911	AGTACAGTGCTCCTATGCGA
chrX_C4	CGATTACCCGATAGGACGAAATAAAAGCTCTGCCCTCATGAATGAACTACGTGTCCTTATAGTACAGTGCTCCTATGCGA	CGATTACCCGATAGGACGAA	ATAAAAGCTCTGCCCTCATGAATGAACTACGTGTCCTTAT	chrX:11501914-11501954	AGTACAGTGCTCCTATGCGA
chrX_C4	CGATTACCCGATAGGACGAAAAAAGAGCACTCAATCTCCCATAGCATTGGCAGGAATGTAAGTACAGTGCTCCTATGCGA	CGATTACCCGATAGGACGAA	AAAAGAGCACTCAATCTCCCATAGCATTGGCAGGAATGTA	chrX:11502155-11502195	AGTACAGTGCTCCTATGCGA
chrX_C4	CGATTACCCGATAGGACGAATCAGTACAACCATTATAAAGAATGCAGAGACTCCTCACAAAGTACAGTGCTCCTATGCGA	CGATTACCCGATAGGACGAA	TCAGTACAACCATTATAAAGAATGCAGAGACTCCTCACAA	chrX:11502197-11502237	AGTACAGTGCTCCTATGCGA
chrX_C4	CGATTACCCGATAGGACGAATTTACAGTAGCTACTTCGTTGTAGCTGTGCCTCACAGTTTAGTACAGTGCTCCTATGCGA	CGATTACCCGATAGGACGAA	TTTACAGTAGCTACTTCGTTGTAGCTGTGCCTCACAGTTT	chrX:11502239-11502279	AGTACAGTGCTCCTATGCGA
chrX_C4	CGATTACCCGATAGGACGAAAAATATCCAAAGGTGATGACACCAAAGACACACCAACATGAGTACAGTGCTCCTATGCGA	CGATTACCCGATAGGACGAA	AAATATCCAAAGGTGATGACACCAAAGACACACCAACATG	chrX:11502281-11502321	AGTACAGTGCTCCTATGCGA
chrX_C4	CGATTACCCGATAGGACGAACATGGTTATTGTTAGTGAGGCACTAGTCACAATAGGTAAGAGTACAGTGCTCCTATGCGA	CGATTACCCGATAGGACGAA	CATGGTTATTGTTAGTGAGGCACTAGTCACAATAGGTAAG	chrX:11502323-11502363	AGTACAGTGCTCCTATGCGA
chrX_C4	CGATTACCCGATAGGACGAAATGGAATCAACCCAAGTATGTACATCCATGGATGAACTAAAGTACAGTGCTCCTATGCGA	CGATTACCCGATAGGACGAA	ATGGAATCAACCCAAGTATGTACATCCATGGATGAACTAA	chrX:11502365-11502405	AGTACAGTGCTCCTATGCGA
chrX_C4	CGATTACCCGATAGGACGAAATTCATCCATGAAGAATAAAACTCTGTCATTTGAAGTGGGAGTACAGTGCTCCTATGCGA	CGATTACCCGATAGGACGAA	ATTCATCCATGAAGAATAAAACTCTGTCATTTGAAGTGGG	chrX:11502473-11502513	AGTACAGTGCTCCTATGCGA
chrX_C4	CGATTACCCGATAGGACGAATAGGATAGTGATTACTAGAGGTTGGGAAAGGGGAAATGGAAGTACAGTGCTCCTATGCGA	CGATTACCCGATAGGACGAA	TAGGATAGTGATTACTAGAGGTTGGGAAAGGGGAAATGGA	chrX:11502603-11502643	AGTACAGTGCTCCTATGCGA
chrX_C4	CGATTACCCGATAGGACGAAGAGGCTAGATTTAATCAGAACATAGTGTAAGCATGTACTGAGTACAGTGCTCCTATGCGA	CGATTACCCGATAGGACGAA	GAGGCTAGATTTAATCAGAACATAGTGTAAGCATGTACTG	chrX:11502649-11502689	AGTACAGTGCTCCTATGCGA
chrX_C4	CGATTACCCGATAGGACGAAATTATTTTAGAAATGTAGAAGACTAGAGAACTCCCATCCCAGTACAGTGCTCCTATGCGA	CGATTACCCGATAGGACGAA	ATTATTTTAGAAATGTAGAAGACTAGAGAACTCCCATCCC	chrX:11502740-11502780	AGTACAGTGCTCCTATGCGA
chrX_C4	CGATTACCCGATAGGACGAACCACTACAGAAGGACAGAGGATACAATAAGAATCCACCATAGTACAGTGCTCCTATGCGA	CGATTACCCGATAGGACGAA	CCACTACAGAAGGACAGAGGATACAATAAGAATCCACCAT	chrX:11502782-11502822	AGTACAGTGCTCCTATGCGA
chrX_C4	CGATTACCCGATAGGACGAAAAACCAGGGATTGAGGCCTAACTGTCCAGACAGCACACCTAGTACAGTGCTCCTATGCGA	CGATTACCCGATAGGACGAA	AAACCAGGGATTGAGGCCTAACTGTCCAGACAGCACACCT	chrX:11502826-11502866	AGTACAGTGCTCCTATGCGA
chrX_C4	CGATTACCCGATAGGACGAACTGCACCTTCATTTGAACTCCCCAGGCTCCGGAGCTGAGAAGTACAGTGCTCCTATGCGA	CGATTACCCGATAGGACGAA	CTGCACCTTCATTTGAACTCCCCAGGCTCCGGAGCTGAGA	chrX:11502868-11502908	AGTACAGTGCTCCTATGCGA
chrX_C4	CGATTACCCGATAGGACGAAAAGCTTCTGTTGCTTATCTATTTCCCAACATGGGGTAGCTAGTACAGTGCTCCTATGCGA	CGATTACCCGATAGGACGAA	AAGCTTCTGTTGCTTATCTATTTCCCAACATGGGGTAGCT	chrX:11502910-11502950	AGTACAGTGCTCCTATGCGA
chrX_C4	CGATTACCCGATAGGACGAAGAACTAACAAAGAAGAAGGGTACCGAGCATTGAGAGTGTTAGTACAGTGCTCCTATGCGA	CGATTACCCGATAGGACGAA	GAACTAACAAAGAAGAAGGGTACCGAGCATTGAGAGTGTT	chrX:11502952-11502992	AGTACAGTGCTCCTATGCGA
chrX_C4	CGATTACCCGATAGGACGAATGTTAAGAATGGGTACTCTAATGATGGGGAACTGGGTGGCAGTACAGTGCTCCTATGCGA	CGATTACCCGATAGGACGAA	TGTTAAGAATGGGTACTCTAATGATGGGGAACTGGGTGGC	chrX:11502994-11503034	AGTACAGTGCTCCTATGCGA
chrX_C4	CGATTACCCGATAGGACGAACAGTATCTTCGGAACTGGAAGGATATTTGAGGTTCATACTAGTACAGTGCTCCTATGCGA	CGATTACCCGATAGGACGAA	CAGTATCTTCGGAACTGGAAGGATATTTGAGGTTCATACT	chrX:11503036-11503076	AGTACAGTGCTCCTATGCGA
chrX_C4	CGATTACCCGATAGGACGAAAAAATGAAATGGGGACCTAAGGTTTTGAGGTCACTCTGGTAGTACAGTGCTCCTATGCGA	CGATTACCCGATAGGACGAA	AAAATGAAATGGGGACCTAAGGTTTTGAGGTCACTCTGGT	chrX:11503098-11503138	AGTACAGTGCTCCTATGCGA
chrX_C4	CGATTACCCGATAGGACGAAAGGCACAGGAAGAAAAGAGGACACGATCCATGGAGAGTGCAGTACAGTGCTCCTATGCGA	CGATTACCCGATAGGACGAA	AGGCACAGGAAGAAAAGAGGACACGATCCATGGAGAGTGC	chrX:11503140-11503180	AGTACAGTGCTCCTATGCGA
chrX_C4	CGATTACCCGATAGGACGAAGCAATTATAAGCAGTGTGTTAGAAATATGGGTGGTAAATGAGTACAGTGCTCCTATGCGA	CGATTACCCGATAGGACGAA	GCAATTATAAGCAGTGTGTTAGAAATATGGGTGGTAAATG	chrX:11503184-11503224	AGTACAGTGCTCCTATGCGA
chrX_C4	CGATTACCCGATAGGACGAAGGGGCCATGTTATTGGATGATAGAGCAAAGGCAGCCCTTGAGTACAGTGCTCCTATGCGA	CGATTACCCGATAGGACGAA	GGGGCCATGTTATTGGATGATAGAGCAAAGGCAGCCCTTG	chrX:11503252-11503292	AGTACAGTGCTCCTATGCGA
chrX_C4	CGATTACCCGATAGGACGAAGGGGTTGGTCATTGGATGAATGCAGCTCATGTTCTTGTGTAGTACAGTGCTCCTATGCGA	CGATTACCCGATAGGACGAA	GGGGTTGGTCATTGGATGAATGCAGCTCATGTTCTTGTGT	chrX:11503314-11503354	AGTACAGTGCTCCTATGCGA
chrX_C4	CGATTACCCGATAGGACGAATGTGAAGTAGAACTGGACAGCGGTGGACTTTGCTACTTCCAGTACAGTGCTCCTATGCGA	CGATTACCCGATAGGACGAA	TGTGAAGTAGAACTGGACAGCGGTGGACTTTGCTACTTCC	chrX:11503356-11503396	AGTACAGTGCTCCTATGCGA
chrX_C4	CGATTACCCGATAGGACGAAAAGTGGTTGCTACACAAAATGTGGAAGAGGTAGCTTGCTTAGTACAGTGCTCCTATGCGA	CGATTACCCGATAGGACGAA	AAGTGGTTGCTACACAAAATGTGGAAGAGGTAGCTTGCTT	chrX:11503398-11503438	AGTACAGTGCTCCTATGCGA
chrX_C4	CGATTACCCGATAGGACGAAAAAAGTTTTGGGCCATTGAGGTTTGGAAATTTTCCTGTTCAGTACAGTGCTCCTATGCGA	CGATTACCCGATAGGACGAA	AAAAGTTTTGGGCCATTGAGGTTTGGAAATTTTCCTGTTC	chrX:11503471-11503511	AGTACAGTGCTCCTATGCGA
chrX_C4	CGATTACCCGATAGGACGAAAAACGGAAATGAAATTCTGTAGTTAGCAGTGACCAGCAAGAGTACAGTGCTCCTATGCGA	CGATTACCCGATAGGACGAA	AAACGGAAATGAAATTCTGTAGTTAGCAGTGACCAGCAAG	chrX:11503513-11503553	AGTACAGTGCTCCTATGCGA
chrX_C4	CGATTACCCGATAGGACGAAGGTGACCAAGAACCCAGTGAGATCAGTGTGAATGTGAGCTAGTACAGTGCTCCTATGCGA	CGATTACCCGATAGGACGAA	GGTGACCAAGAACCCAGTGAGATCAGTGTGAATGTGAGCT	chrX:11503555-11503595	AGTACAGTGCTCCTATGCGA
chrX_C4	CGATTACCCGATAGGACGAAGGCTTACATGGCCTTCCAATGGAAGCTGCATGCTATTCTTAGTACAGTGCTCCTATGCGA	CGATTACCCGATAGGACGAA	GGCTTACATGGCCTTCCAATGGAAGCTGCATGCTATTCTT	chrX:11503597-11503637	AGTACAGTGCTCCTATGCGA
chrX_C4	CGATTACCCGATAGGACGAAGCACAAGACAGCAAGGCCTCTAAAGGCTATATAATGGCTAAGTACAGTGCTCCTATGCGA	CGATTACCCGATAGGACGAA	GCACAAGACAGCAAGGCCTCTAAAGGCTATATAATGGCTA	chrX:11503639-11503679	AGTACAGTGCTCCTATGCGA
chrX_C4	CGATTACCCGATAGGACGAATAAAAGGAAAAGGAGGGCATCACCTCACTTTTGACAGGCTAGTACAGTGCTCCTATGCGA	CGATTACCCGATAGGACGAA	TAAAAGGAAAAGGAGGGCATCACCTCACTTTTGACAGGCT	chrX:11503681-11503721	AGTACAGTGCTCCTATGCGA
chrX_C4	CGATTACCCGATAGGACGAAATTATTTCCACCCAGAGTTCTCAGACAGGGAATATCACCTAGTACAGTGCTCCTATGCGA	CGATTACCCGATAGGACGAA	ATTATTTCCACCCAGAGTTCTCAGACAGGGAATATCACCT	chrX:11503723-11503763	AGTACAGTGCTCCTATGCGA
chrX_C4	CGATTACCCGATAGGACGAAAAAAGGACAGGGATAATAGAGTCAGTGCTCAGTAGGTCAAAGTACAGTGCTCCTATGCGA	CGATTACCCGATAGGACGAA	AAAAGGACAGGGATAATAGAGTCAGTGCTCAGTAGGTCAA	chrX:11503785-11503825	AGTACAGTGCTCCTATGCGA
chrX_C4	CGATTACCCGATAGGACGAATCAGTCATCATAGTGCCCTTATAAGGAAAGACCCTATAGAAGTACAGTGCTCCTATGCGA	CGATTACCCGATAGGACGAA	TCAGTCATCATAGTGCCCTTATAAGGAAAGACCCTATAGA	chrX:11503827-11503867	AGTACAGTGCTCCTATGCGA
chrX_C4	CGATTACCCGATAGGACGAACCCCATCTAGCAGGTGCAGTCACGGCAAGACTAGAAAGCAAGTACAGTGCTCCTATGCGA	CGATTACCCGATAGGACGAA	CCCCATCTAGCAGGTGCAGTCACGGCAAGACTAGAAAGCA	chrX:11503877-11503917	AGTACAGTGCTCCTATGCGA
chrX_C4	CGATTACCCGATAGGACGAACTCACATGACAAGCACTCTACCAACTCAAGCCCTCGCCTCGAATCGTCCAGCTAGTACGT	CGATTACCCGATAGGACGAA	CTCACATGACAAGCACTCTACCAACTCAAGCCCTCGCCTC	chrX:12498319-12498359	GAATCGTCCAGCTAGTACGT
chrX_C4	CGATTACCCGATAGGACGAATGTTTTGACATTCCTTCCAGTAACCAGTGGGGTCTTGGTAGAATCGTCCAGCTAGTACGT	CGATTACCCGATAGGACGAA	TGTTTTGACATTCCTTCCAGTAACCAGTGGGGTCTTGGTA	chrX:12498361-12498401	GAATCGTCCAGCTAGTACGT
chrX_C4	CGATTACCCGATAGGACGAACTCCTGTCGAATCAGGAAAGCAGGCTTAAGTCCCATAAGGGAATCGTCCAGCTAGTACGT	CGATTACCCGATAGGACGAA	CTCCTGTCGAATCAGGAAAGCAGGCTTAAGTCCCATAAGG	chrX:12498403-12498443	GAATCGTCCAGCTAGTACGT
chrX_C4	CGATTACCCGATAGGACGAAGCGAAGCGCCTCTTTGCTTCCCTCTAAAGCTGGCTCATGCGAATCGTCCAGCTAGTACGT	CGATTACCCGATAGGACGAA	GCGAAGCGCCTCTTTGCTTCCCTCTAAAGCTGGCTCATGC	chrX:12498447-12498487	GAATCGTCCAGCTAGTACGT
chrX_C4	CGATTACCCGATAGGACGAAGGTCAGGCAGCTTCTTCCTGCTGTTGGGGCACTTGCTGTTGAATCGTCCAGCTAGTACGT	CGATTACCCGATAGGACGAA	GGTCAGGCAGCTTCTTCCTGCTGTTGGGGCACTTGCTGTT	chrX:12498489-12498529	GAATCGTCCAGCTAGTACGT
chrX_C4	CGATTACCCGATAGGACGAAAGCTCCACTTCTCTAAGTCTGGATGCTTGAAAGACCATTCGAATCGTCCAGCTAGTACGT	CGATTACCCGATAGGACGAA	AGCTCCACTTCTCTAAGTCTGGATGCTTGAAAGACCATTC	chrX:12498531-12498571	GAATCGTCCAGCTAGTACGT
chrX_C4	CGATTACCCGATAGGACGAAGAAGATGGTAGTGGATAAACCTGCCTTGTCAGCTATGATCGAATCGTCCAGCTAGTACGT	CGATTACCCGATAGGACGAA	GAAGATGGTAGTGGATAAACCTGCCTTGTCAGCTATGATC	chrX:12498573-12498613	GAATCGTCCAGCTAGTACGT
chrX_C4	CGATTACCCGATAGGACGAATACCTGGCTTCTAGGTAGATAAGCAAACCCTCTAGAACCTGAATCGTCCAGCTAGTACGT	CGATTACCCGATAGGACGAA	TACCTGGCTTCTAGGTAGATAAGCAAACCCTCTAGAACCT	chrX:12498615-12498655	GAATCGTCCAGCTAGTACGT
chrX_C4	CGATTACCCGATAGGACGAATCTACCAGCCAAATAGCACAGAGACCTTGCTCCATGCTTTGAATCGTCCAGCTAGTACGT	CGATTACCCGATAGGACGAA	TCTACCAGCCAAATAGCACAGAGACCTTGCTCCATGCTTT	chrX:12498657-12498697	GAATCGTCCAGCTAGTACGT
chrX_C4	CGATTACCCGATAGGACGAAGGAGAAGAACTGTGTGGCCAAATGCTCTCTGAGTTCCTGAGAATCGTCCAGCTAGTACGT	CGATTACCCGATAGGACGAA	GGAGAAGAACTGTGTGGCCAAATGCTCTCTGAGTTCCTGA	chrX:12498699-12498739	GAATCGTCCAGCTAGTACGT
chrX_C4	CGATTACCCGATAGGACGAACATGAAACCTTAAGACAGTGGAAAAGTTATTTTCAGCTCTGAATCGTCCAGCTAGTACGT	CGATTACCCGATAGGACGAA	CATGAAACCTTAAGACAGTGGAAAAGTTATTTTCAGCTCT	chrX:12498741-12498781	GAATCGTCCAGCTAGTACGT
chrX_C4	CGATTACCCGATAGGACGAAAGGACCGAAGTACTTCATTTCCCAGAAACACAAAAGTAGAGAATCGTCCAGCTAGTACGT	CGATTACCCGATAGGACGAA	AGGACCGAAGTACTTCATTTCCCAGAAACACAAAAGTAGA	chrX:12498783-12498823	GAATCGTCCAGCTAGTACGT
chrX_C4	CGATTACCCGATAGGACGAAACCCTCAGCCTCTTGAATTGGCTCCACAGGACCAGGTTCAGAATCGTCCAGCTAGTACGT	CGATTACCCGATAGGACGAA	ACCCTCAGCCTCTTGAATTGGCTCCACAGGACCAGGTTCA	chrX:12498825-12498865	GAATCGTCCAGCTAGTACGT
chrX_C4	CGATTACCCGATAGGACGAACAGAACAGATAAAGGTGTTTCTGGAAACTGGAGATGGGAGGAATCGTCCAGCTAGTACGT	CGATTACCCGATAGGACGAA	CAGAACAGATAAAGGTGTTTCTGGAAACTGGAGATGGGAG	chrX:12498867-12498907	GAATCGTCCAGCTAGTACGT
chrX_C4	CGATTACCCGATAGGACGAATGAAAGGGGATGGATTCCAGAGAAGAACAGGCAGATCTCTGAATCGTCCAGCTAGTACGT	CGATTACCCGATAGGACGAA	TGAAAGGGGATGGATTCCAGAGAAGAACAGGCAGATCTCT	chrX:12498909-12498949	GAATCGTCCAGCTAGTACGT
chrX_C4	CGATTACCCGATAGGACGAAGAAACAGCTACCTCATGTCCATGGAAGTCATAGCACGCTCGAATCGTCCAGCTAGTACGT	CGATTACCCGATAGGACGAA	GAAACAGCTACCTCATGTCCATGGAAGTCATAGCACGCTC	chrX:12498951-12498991	GAATCGTCCAGCTAGTACGT
chrX_C4	CGATTACCCGATAGGACGAATTGTGGGACCAACACCTTTTGGCCTGTTCTGGCCTAGCTGGAATCGTCCAGCTAGTACGT	CGATTACCCGATAGGACGAA	TTGTGGGACCAACACCTTTTGGCCTGTTCTGGCCTAGCTG	chrX:12498993-12499033	GAATCGTCCAGCTAGTACGT
chrX_C4	CGATTACCCGATAGGACGAATGATAGGCCACAGAGCCCTCGGCACAGCCTGAATTGGCAGGAATCGTCCAGCTAGTACGT	CGATTACCCGATAGGACGAA	TGATAGGCCACAGAGCCCTCGGCACAGCCTGAATTGGCAG	chrX:12499035-12499075	GAATCGTCCAGCTAGTACGT
chrX_C4	CGATTACCCGATAGGACGAAGAAGGCCTAGAGCAGCTCCTCCTTCTTCCCTTTCAGGTGGGAATCGTCCAGCTAGTACGT	CGATTACCCGATAGGACGAA	GAAGGCCTAGAGCAGCTCCTCCTTCTTCCCTTTCAGGTGG	chrX:12499077-12499117	GAATCGTCCAGCTAGTACGT
chrX_C4	CGATTACCCGATAGGACGAAACAGAGCTTCGGAGACCCAAAGTGCCTTGCAGCCCATAGGGAATCGTCCAGCTAGTACGT	CGATTACCCGATAGGACGAA	ACAGAGCTTCGGAGACCCAAAGTGCCTTGCAGCCCATAGG	chrX:12499119-12499159	GAATCGTCCAGCTAGTACGT
chrX_C4	CGATTACCCGATAGGACGAACAAAGCCTGTTGACTAGCCCTTACAACCCCTAGAGGGGCTGAATCGTCCAGCTAGTACGT	CGATTACCCGATAGGACGAA	CAAAGCCTGTTGACTAGCCCTTACAACCCCTAGAGGGGCT	chrX:12499161-12499201	GAATCGTCCAGCTAGTACGT
chrX_C4	CGATTACCCGATAGGACGAAGTGGAGCTATGATGCCAAAAGACCCAGAGTGTAGGCCCAGGAATCGTCCAGCTAGTACGT	CGATTACCCGATAGGACGAA	GTGGAGCTATGATGCCAAAAGACCCAGAGTGTAGGCCCAG	chrX:12499203-12499243	GAATCGTCCAGCTAGTACGT
chrX_C4	CGATTACCCGATAGGACGAATCTTCATCTCCCAACCCTGCTAAAATGATTCAGTTTCCTCGAATCGTCCAGCTAGTACGT	CGATTACCCGATAGGACGAA	TCTTCATCTCCCAACCCTGCTAAAATGATTCAGTTTCCTC	chrX:12499245-12499285	GAATCGTCCAGCTAGTACGT
chrX_C4	CGATTACCCGATAGGACGAAGTAACACGAATTCCTGAGAGGCCTTGCAAACACTCAACAGGAATCGTCCAGCTAGTACGT	CGATTACCCGATAGGACGAA	GTAACACGAATTCCTGAGAGGCCTTGCAAACACTCAACAG	chrX:12499287-12499327	GAATCGTCCAGCTAGTACGT
chrX_C4	CGATTACCCGATAGGACGAAACTGGCACCTCCATGCCTACTTGCCCTCCTGATTTATGTCGAATCGTCCAGCTAGTACGT	CGATTACCCGATAGGACGAA	ACTGGCACCTCCATGCCTACTTGCCCTCCTGATTTATGTC	chrX:12499329-12499369	GAATCGTCCAGCTAGTACGT
chrX_C4	CGATTACCCGATAGGACGAATTCTGCTTATCTCACTACAAAGGACTCCAACCAACATGTTGAATCGTCCAGCTAGTACGT	CGATTACCCGATAGGACGAA	TTCTGCTTATCTCACTACAAAGGACTCCAACCAACATGTT	chrX:12499371-12499411	GAATCGTCCAGCTAGTACGT
chrX_C4	CGATTACCCGATAGGACGAATTCTTAGGTTCTATCTCTATATTCTCATGTCCTGGGTTTTGAATCGTCCAGCTAGTACGT	CGATTACCCGATAGGACGAA	TTCTTAGGTTCTATCTCTATATTCTCATGTCCTGGGTTTT	chrX:12499413-12499453	GAATCGTCCAGCTAGTACGT
chrX_C4	CGATTACCCGATAGGACGAAAAGAACTTTCTAGAATATTCTGAATGAAACCTAGCAGTCCGAATCGTCCAGCTAGTACGT	CGATTACCCGATAGGACGAA	AAGAACTTTCTAGAATATTCTGAATGAAACCTAGCAGTCC	chrX:12499469-12499509	GAATCGTCCAGCTAGTACGT
chrX_C4	CGATTACCCGATAGGACGAAGAAACCTCCTCTTGGCTGCATTGGGTTTCTCTTTGCTCCCGAATCGTCCAGCTAGTACGT	CGATTACCCGATAGGACGAA	GAAACCTCCTCTTGGCTGCATTGGGTTTCTCTTTGCTCCC	chrX:12499511-12499551	GAATCGTCCAGCTAGTACGT
chrX_C4	CGATTACCCGATAGGACGAATATCACAGCCTGGTTCTCCCAGAATGCCACTGAATTCTAAGAATCGTCCAGCTAGTACGT	CGATTACCCGATAGGACGAA	TATCACAGCCTGGTTCTCCCAGAATGCCACTGAATTCTAA	chrX:12499553-12499593	GAATCGTCCAGCTAGTACGT
chrX_C4	CGATTACCCGATAGGACGAAAGAAAGAAAAGAGTCATACGAAGTGAAGGTGGAAGAATGTGAATCGTCCAGCTAGTACGT	CGATTACCCGATAGGACGAA	AGAAAGAAAAGAGTCATACGAAGTGAAGGTGGAAGAATGT	chrX:12499784-12499824	GAATCGTCCAGCTAGTACGT
chrX_C4	CGATTACCCGATAGGACGAAGAGCTAGAAGAAGGGGTGGGGTGTCGTAGAACACTCTTCCGAATCGTCCAGCTAGTACGT	CGATTACCCGATAGGACGAA	GAGCTAGAAGAAGGGGTGGGGTGTCGTAGAACACTCTTCC	chrX:12499826-12499866	GAATCGTCCAGCTAGTACGT
chrX_C4	CGATTACCCGATAGGACGAAAGCCATGAGATGCTTGTTGAGTTCTTGTATTCTAAGCAGCGAATCGTCCAGCTAGTACGT	CGATTACCCGATAGGACGAA	AGCCATGAGATGCTTGTTGAGTTCTTGTATTCTAAGCAGC	chrX:12499868-12499908	GAATCGTCCAGCTAGTACGT
chrX_C4	CGATTACCCGATAGGACGAAATCATCAGTCTGTCAAGGAGTGGGGAGGGGCCCAAAAGGTGAATCGTCCAGCTAGTACGT	CGATTACCCGATAGGACGAA	ATCATCAGTCTGTCAAGGAGTGGGGAGGGGCCCAAAAGGT	chrX:12499980-12500020	GAATCGTCCAGCTAGTACGT
chrX_C4	CGATTACCCGATAGGACGAATTTCTGTCAGTAATCCTAGTGAAAGTCCATGGGTCACTCGGAATCGTCCAGCTAGTACGT	CGATTACCCGATAGGACGAA	TTTCTGTCAGTAATCCTAGTGAAAGTCCATGGGTCACTCG	chrX:12500136-12500176	GAATCGTCCAGCTAGTACGT
chrX_C4	CGATTACCCGATAGGACGAAAAAGGCATGAAAGTAAAATAGGATAGTCAGGACAAGGAAAGAATCGTCCAGCTAGTACGT	CGATTACCCGATAGGACGAA	AAAGGCATGAAAGTAAAATAGGATAGTCAGGACAAGGAAA	chrX:12500184-12500224	GAATCGTCCAGCTAGTACGT
chrX_C4	CGATTACCCGATAGGACGAAAATGAGTGCAAAGGGGATGGGGACATGAGAGAGGAATTGGGAATCGTCCAGCTAGTACGT	CGATTACCCGATAGGACGAA	AATGAGTGCAAAGGGGATGGGGACATGAGAGAGGAATTGG	chrX:12500226-12500266	GAATCGTCCAGCTAGTACGT
chrX_C4	CGATTACCCGATAGGACGAAGAGCGAGAGAATTAGAACAAGAGAGTGAGAGAAACTAAAGGAATCGTCCAGCTAGTACGT	CGATTACCCGATAGGACGAA	GAGCGAGAGAATTAGAACAAGAGAGTGAGAGAAACTAAAG	chrX:12500364-12500404	GAATCGTCCAGCTAGTACGT
chrX_C4	CGATTACCCGATAGGACGAATGCTCTTCAGCAGGCAATATCCAAAATTTTCCATTCCTTCGAATCGTCCAGCTAGTACGT	CGATTACCCGATAGGACGAA	TGCTCTTCAGCAGGCAATATCCAAAATTTTCCATTCCTTC	chrX:12500425-12500465	GAATCGTCCAGCTAGTACGT
chrX_C4	CGATTACCCGATAGGACGAACAGGGAGCCAGGGCACAGAACTGTCACGTGAGACTAGATCGAATCGTCCAGCTAGTACGT	CGATTACCCGATAGGACGAA	CAGGGAGCCAGGGCACAGAACTGTCACGTGAGACTAGATC	chrX:12500467-12500507	GAATCGTCCAGCTAGTACGT
chrX_C4	CGATTACCCGATAGGACGAAGAAATGAAGTCCTCTGAACCAACCACACCTGCTTTGTCAGGAATCGTCCAGCTAGTACGT	CGATTACCCGATAGGACGAA	GAAATGAAGTCCTCTGAACCAACCACACCTGCTTTGTCAG	chrX:12500509-12500549	GAATCGTCCAGCTAGTACGT
chrX_C4	CGATTACCCGATAGGACGAAATTCCCTTTGAAACATGTCCTCAAGACTGCCCAGGACCACGAATCGTCCAGCTAGTACGT	CGATTACCCGATAGGACGAA	ATTCCCTTTGAAACATGTCCTCAAGACTGCCCAGGACCAC	chrX:12500551-12500591	GAATCGTCCAGCTAGTACGT
chrX_C4	CGATTACCCGATAGGACGAACACCTAGGACAAACCTCTCTTGCATGAGGAGTCTTAAGGAGAATCGTCCAGCTAGTACGT	CGATTACCCGATAGGACGAA	CACCTAGGACAAACCTCTCTTGCATGAGGAGTCTTAAGGA	chrX:12500593-12500633	GAATCGTCCAGCTAGTACGT
chrX_C4	CGATTACCCGATAGGACGAACCAGATCTTAAATCTTGTCCATGGGTGTAGGAGTGGGAGGGAATCGTCCAGCTAGTACGT	CGATTACCCGATAGGACGAA	CCAGATCTTAAATCTTGTCCATGGGTGTAGGAGTGGGAGG	chrX:12500635-12500675	GAATCGTCCAGCTAGTACGT
chrX_C4	CGATTACCCGATAGGACGAACAAGAGAGGGCCTGAGCCATAAGGAAGGCTGTCTCCAGCCGAATCGTCCAGCTAGTACGT	CGATTACCCGATAGGACGAA	CAAGAGAGGGCCTGAGCCATAAGGAAGGCTGTCTCCAGCC	chrX:12500677-12500717	GAATCGTCCAGCTAGTACGT
chrX_C4	CGATTACCCGATAGGACGAATGGATACCCATCTCATCTCCCGTCTAACCCAGGGCGGTTAGAATCGTCCAGCTAGTACGT	CGATTACCCGATAGGACGAA	TGGATACCCATCTCATCTCCCGTCTAACCCAGGGCGGTTA	chrX:12500719-12500759	GAATCGTCCAGCTAGTACGT
chrX_C4	CGATTACCCGATAGGACGAAGCCAGGAAGCCAGAGGCTGGGCTGCCAAGAGTTAGCTGGAGAATCGTCCAGCTAGTACGT	CGATTACCCGATAGGACGAA	GCCAGGAAGCCAGAGGCTGGGCTGCCAAGAGTTAGCTGGA	chrX:12500761-12500801	GAATCGTCCAGCTAGTACGT
chrX_C4	CGATTACCCGATAGGACGAACCTCCCAAAAGCTTGTTATCAGGAAATCTTTTCTCTCCCAGAATCGTCCAGCTAGTACGT	CGATTACCCGATAGGACGAA	CCTCCCAAAAGCTTGTTATCAGGAAATCTTTTCTCTCCCA	chrX:12500803-12500843	GAATCGTCCAGCTAGTACGT
chrX_C4	CGATTACCCGATAGGACGAACAAACAGGTTCTCTTGGCACATTGTTGCTGCTCTGGTGAAGAATCGTCCAGCTAGTACGT	CGATTACCCGATAGGACGAA	CAAACAGGTTCTCTTGGCACATTGTTGCTGCTCTGGTGAA	chrX:12500845-12500885	GAATCGTCCAGCTAGTACGT
chrX_C4	CGATTACCCGATAGGACGAAAGGGATCATTAGGGAGAGAGGGTGGAGCTAGAAGTTTAGAGAATCGTCCAGCTAGTACGT	CGATTACCCGATAGGACGAA	AGGGATCATTAGGGAGAGAGGGTGGAGCTAGAAGTTTAGA	chrX:12500887-12500927	GAATCGTCCAGCTAGTACGT
chrX_C4	CGATTACCCGATAGGACGAATTTTGGTAGACCCAAGGGAAAATTCCTCCTCCCTTCTTTCGAATCGTCCAGCTAGTACGT	CGATTACCCGATAGGACGAA	TTTTGGTAGACCCAAGGGAAAATTCCTCCTCCCTTCTTTC	chrX:12500946-12500986	GAATCGTCCAGCTAGTACGT
chrX_C4	CGATTACCCGATAGGACGAATTCACCTCCTCTTTCTCCTCCGCCTGCCTTTCTCTTCTGCGAATCGTCCAGCTAGTACGT	CGATTACCCGATAGGACGAA	TTCACCTCCTCTTTCTCCTCCGCCTGCCTTTCTCTTCTGC	chrX:12501021-12501061	GAATCGTCCAGCTAGTACGT
chrX_C4	CGATTACCCGATAGGACGAAGCTTAGCCAGGAGACTGGTTCCAAACTTTGCTCCAGGCGCGAATCGTCCAGCTAGTACGT	CGATTACCCGATAGGACGAA	GCTTAGCCAGGAGACTGGTTCCAAACTTTGCTCCAGGCGC	chrX:12501063-12501103	GAATCGTCCAGCTAGTACGT
chrX_C4	CGATTACCCGATAGGACGAATCCACACTCTCCCTTTCCTTCCGGTTCTGACCTAGTTTAAGAATCGTCCAGCTAGTACGT	CGATTACCCGATAGGACGAA	TCCACACTCTCCCTTTCCTTCCGGTTCTGACCTAGTTTAA	chrX:12501105-12501145	GAATCGTCCAGCTAGTACGT
chrX_C4	CGATTACCCGATAGGACGAATCCATCAGAAGTAGCCCCTGGGACCAGTTTAGATTTATTGGAATCGTCCAGCTAGTACGT	CGATTACCCGATAGGACGAA	TCCATCAGAAGTAGCCCCTGGGACCAGTTTAGATTTATTG	chrX:12501148-12501188	GAATCGTCCAGCTAGTACGT
chrX_C4	CGATTACCCGATAGGACGAAGGGAACTGAAGTTGGGTGAAGGAGACGAGACAGAGAAGGGGAATCGTCCAGCTAGTACGT	CGATTACCCGATAGGACGAA	GGGAACTGAAGTTGGGTGAAGGAGACGAGACAGAGAAGGG	chrX:12501190-12501230	GAATCGTCCAGCTAGTACGT
chrX_C4	CGATTACCCGATAGGACGAAGGGGCTGCTGCAGCCCCACTGGGCACCTCTGAGAGACTGCGAATCGTCCAGCTAGTACGT	CGATTACCCGATAGGACGAA	GGGGCTGCTGCAGCCCCACTGGGCACCTCTGAGAGACTGC	chrX:12501266-12501306	GAATCGTCCAGCTAGTACGT
chrX_C4	CGATTACCCGATAGGACGAAAGCCTTGCACTTCAGAGTACTGGATATAGCAGGGCCACCTGAATCGTCCAGCTAGTACGT	CGATTACCCGATAGGACGAA	AGCCTTGCACTTCAGAGTACTGGATATAGCAGGGCCACCT	chrX:12501308-12501348	GAATCGTCCAGCTAGTACGT
chrX_C4	CGATTACCCGATAGGACGAAGAAGTCCTGTCTGCCTCTGACAGAGGCCCCTCAGGTAACAGAATCGTCCAGCTAGTACGT	CGATTACCCGATAGGACGAA	GAAGTCCTGTCTGCCTCTGACAGAGGCCCCTCAGGTAACA	chrX:12501350-12501390	GAATCGTCCAGCTAGTACGT
chrX_C4	CGATTACCCGATAGGACGAACCAAATGACAGTAACTGACTCTTCTGGTACACACTAGAACGAATCGTCCAGCTAGTACGT	CGATTACCCGATAGGACGAA	CCAAATGACAGTAACTGACTCTTCTGGTACACACTAGAAC	chrX:12501416-12501456	GAATCGTCCAGCTAGTACGT
chrX_C4	CGATTACCCGATAGGACGAAGGAGCCTGGAAGGCAGGAGTATGCAAGACAATGTGTGTGTGAATCGTCCAGCTAGTACGT	CGATTACCCGATAGGACGAA	GGAGCCTGGAAGGCAGGAGTATGCAAGACAATGTGTGTGT	chrX:12501458-12501498	GAATCGTCCAGCTAGTACGT
chrX_C4	CGATTACCCGATAGGACGAACTGCACTTTCTTTCCCTCCAGACCTGTCCTTCCACCTCCCGAATCGTCCAGCTAGTACGT	CGATTACCCGATAGGACGAA	CTGCACTTTCTTTCCCTCCAGACCTGTCCTTCCACCTCCC	chrX:12501500-12501540	GAATCGTCCAGCTAGTACGT
chrX_C4	CGATTACCCGATAGGACGAATTGGCTCTTTACCCACACATCAGCAGTGAGCATATTCCTGGAATCGTCCAGCTAGTACGT	CGATTACCCGATAGGACGAA	TTGGCTCTTTACCCACACATCAGCAGTGAGCATATTCCTG	chrX:12501542-12501582	GAATCGTCCAGCTAGTACGT
chrX_C4	CGATTACCCGATAGGACGAACTGAATGGGGACCACAAGGACAGCAGAAACAGTCTGGGAGGAATCGTCCAGCTAGTACGT	CGATTACCCGATAGGACGAA	CTGAATGGGGACCACAAGGACAGCAGAAACAGTCTGGGAG	chrX:12501584-12501624	GAATCGTCCAGCTAGTACGT
chrX_C4	CGATTACCCGATAGGACGAAGACCAGGCTTTTACAGAGGACAGTGCACCTCTTTTCTCTAGAATCGTCCAGCTAGTACGT	CGATTACCCGATAGGACGAA	GACCAGGCTTTTACAGAGGACAGTGCACCTCTTTTCTCTA	chrX:12501626-12501666	GAATCGTCCAGCTAGTACGT
chrX_C4	CGATTACCCGATAGGACGAATCCAGCTTTTAGGGAACATGCCCATGCCACAAGCTGCTCCGAATCGTCCAGCTAGTACGT	CGATTACCCGATAGGACGAA	TCCAGCTTTTAGGGAACATGCCCATGCCACAAGCTGCTCC	chrX:12501668-12501708	GAATCGTCCAGCTAGTACGT
chrX_C4	CGATTACCCGATAGGACGAATTTTCCTGTGAGTGCTTGCCCAAGAGTGATCTTCTCTTTGGAATCGTCCAGCTAGTACGT	CGATTACCCGATAGGACGAA	TTTTCCTGTGAGTGCTTGCCCAAGAGTGATCTTCTCTTTG	chrX:12501744-12501784	GAATCGTCCAGCTAGTACGT
chrX_C4	CGATTACCCGATAGGACGAAGGCCATGCAGCAAAGCCTCCCCTCACTTCATTGAGATGCCGAATCGTCCAGCTAGTACGT	CGATTACCCGATAGGACGAA	GGCCATGCAGCAAAGCCTCCCCTCACTTCATTGAGATGCC	chrX:12501786-12501826	GAATCGTCCAGCTAGTACGT
chrX_C4	CGATTACCCGATAGGACGAAATTTGGTGGCGTTGAGCCCAGCTGTCCCCACTATGACCAAGAATCGTCCAGCTAGTACGT	CGATTACCCGATAGGACGAA	ATTTGGTGGCGTTGAGCCCAGCTGTCCCCACTATGACCAA	chrX:12501828-12501868	GAATCGTCCAGCTAGTACGT
chrX_C4	CGATTACCCGATAGGACGAACTGGACACTGAGCTTGAGTGTGTTTGTATTTCCCGTTTCCGAATCGTCCAGCTAGTACGT	CGATTACCCGATAGGACGAA	CTGGACACTGAGCTTGAGTGTGTTTGTATTTCCCGTTTCC	chrX:12501870-12501910	GAATCGTCCAGCTAGTACGT
chrX_C4	CGATTACCCGATAGGACGAAGGCTCCTCCTCTCCCAGGAGTGGGAGGTGGTAAGGAAGCTGAATCGTCCAGCTAGTACGT	CGATTACCCGATAGGACGAA	GGCTCCTCCTCTCCCAGGAGTGGGAGGTGGTAAGGAAGCT	chrX:12501912-12501952	GAATCGTCCAGCTAGTACGT
chrX_C4	CGATTACCCGATAGGACGAAAATTTGCTAAACTGGTATTAGTCTTCCCAAGAGGCAGACAGAATCGTCCAGCTAGTACGT	CGATTACCCGATAGGACGAA	AATTTGCTAAACTGGTATTAGTCTTCCCAAGAGGCAGACA	chrX:12501954-12501994	GAATCGTCCAGCTAGTACGT
chrX_C4	CGATTACCCGATAGGACGAAGTTGCTCAGTCAAAACACACGGTGCTGTGGCTAGAAGAGGGAATCGTCCAGCTAGTACGT	CGATTACCCGATAGGACGAA	GTTGCTCAGTCAAAACACACGGTGCTGTGGCTAGAAGAGG	chrX:12501996-12502036	GAATCGTCCAGCTAGTACGT
chrX_C4	CGATTACCCGATAGGACGAATGCAGTAGAACACAGGCAGATCTGTACAACCCCAACCATGGAATCGTCCAGCTAGTACGT	CGATTACCCGATAGGACGAA	TGCAGTAGAACACAGGCAGATCTGTACAACCCCAACCATG	chrX:12502038-12502078	GAATCGTCCAGCTAGTACGT
chrX_C4	CGATTACCCGATAGGACGAACCAGCTTCCCCAGGGCACAACTCTCTGACCTTTACCTTGTGAATCGTCCAGCTAGTACGT	CGATTACCCGATAGGACGAA	CCAGCTTCCCCAGGGCACAACTCTCTGACCTTTACCTTGT	chrX:12502080-12502120	GAATCGTCCAGCTAGTACGT
chrX_C4	CGATTACCCGATAGGACGAATTTTGCAGAAGGGAAGCAAAGACAGCCACCCAAGGGCCTTGAATCGTCCAGCTAGTACGT	CGATTACCCGATAGGACGAA	TTTTGCAGAAGGGAAGCAAAGACAGCCACCCAAGGGCCTT	chrX:12502146-12502186	GAATCGTCCAGCTAGTACGT
chrX_C4	CGATTACCCGATAGGACGAATACAACTCCTGGCCCAGCCCTGGCCCAGTCTCGCTTCAGTGAATCGTCCAGCTAGTACGT	CGATTACCCGATAGGACGAA	TACAACTCCTGGCCCAGCCCTGGCCCAGTCTCGCTTCAGT	chrX:12502188-12502228	GAATCGTCCAGCTAGTACGT
chrX_C4	CGATTACCCGATAGGACGAACTCTAGGAAAGGCTTGGAGAAATTCTCCGGCTTGGGAGAAGAATCGTCCAGCTAGTACGT	CGATTACCCGATAGGACGAA	CTCTAGGAAAGGCTTGGAGAAATTCTCCGGCTTGGGAGAA	chrX:12502234-12502274	GAATCGTCCAGCTAGTACGT
chrX_C4	CGATTACCCGATAGGACGAAACAGACATGGGTTTGAATTTTGCTGTCAACGTTTCCCTCCGAATCGTCCAGCTAGTACGT	CGATTACCCGATAGGACGAA	ACAGACATGGGTTTGAATTTTGCTGTCAACGTTTCCCTCC	chrX:12502276-12502316	GAATCGTCCAGCTAGTACGT
chrX_C4	CGATTACCCGATAGGACGAATTAACAAATATGAATGAACCCCTACATCTGTCCCTGGCACGAATCGTCCAGCTAGTACGT	CGATTACCCGATAGGACGAA	TTAACAAATATGAATGAACCCCTACATCTGTCCCTGGCAC	chrX:12502318-12502358	GAATCGTCCAGCTAGTACGT
chrX_C4	CGATTACCCGATAGGACGAATTAGGTTCTAGGGATATAGTGATAAGCATCAGGGGTTTTAGAATCGTCCAGCTAGTACGT	CGATTACCCGATAGGACGAA	TTAGGTTCTAGGGATATAGTGATAAGCATCAGGGGTTTTA	chrX:12502360-12502400	GAATCGTCCAGCTAGTACGT
chrX_C4	CGATTACCCGATAGGACGAAAGAGTCGATAAATAACATCCTTTCATCCCCTCTCCGAGCAGAATCGTCCAGCTAGTACGT	CGATTACCCGATAGGACGAA	AGAGTCGATAAATAACATCCTTTCATCCCCTCTCCGAGCA	chrX:12502402-12502442	GAATCGTCCAGCTAGTACGT
chrX_C4	CGATTACCCGATAGGACGAATGAGGAACTGACAGAGATGTCTGAAAGTTGGAACTCAAAAGAATCGTCCAGCTAGTACGT	CGATTACCCGATAGGACGAA	TGAGGAACTGACAGAGATGTCTGAAAGTTGGAACTCAAAA	chrX:12502444-12502484	GAATCGTCCAGCTAGTACGT
chrX_C4	CGATTACCCGATAGGACGAATCCTTTATTACACAGAAGGCTATATTGGTGGATGTGGCTTGAATCGTCCAGCTAGTACGT	CGATTACCCGATAGGACGAA	TCCTTTATTACACAGAAGGCTATATTGGTGGATGTGGCTT	chrX:12502486-12502526	GAATCGTCCAGCTAGTACGT
chrX_C4	CGATTACCCGATAGGACGAAGATCTGTCACTACAATGTCTCGCTGACACTCATCCAGTATGAATCGTCCAGCTAGTACGT	CGATTACCCGATAGGACGAA	GATCTGTCACTACAATGTCTCGCTGACACTCATCCAGTAT	chrX:12502528-12502568	GAATCGTCCAGCTAGTACGT
chrX_C4	CGATTACCCGATAGGACGAAATCTTAGCCATTCAGCCCCAGGCAGGACAAAAGTTCTTTTGAATCGTCCAGCTAGTACGT	CGATTACCCGATAGGACGAA	ATCTTAGCCATTCAGCCCCAGGCAGGACAAAAGTTCTTTT	chrX:12502570-12502610	GAATCGTCCAGCTAGTACGT
chrX_C4	CGATTACCCGATAGGACGAAAACTGAAATATGCTTTAACTGGGCCAGCTGCCTCCCGAAGGAATCGTCCAGCTAGTACGT	CGATTACCCGATAGGACGAA	AACTGAAATATGCTTTAACTGGGCCAGCTGCCTCCCGAAG	chrX:12502612-12502652	GAATCGTCCAGCTAGTACGT
chrX_C4	CGATTACCCGATAGGACGAAGGGGAGAGGGGCAAGACATGGGGACTGAGACAATCCCCTGGAATCGTCCAGCTAGTACGT	CGATTACCCGATAGGACGAA	GGGGAGAGGGGCAAGACATGGGGACTGAGACAATCCCCTG	chrX:12502662-12502702	GAATCGTCCAGCTAGTACGT
chrX_C4	CGATTACCCGATAGGACGAATTTTGTCCTGACTCATCTGTTACATAAGAGGTGTTCTGAAGAATCGTCCAGCTAGTACGT	CGATTACCCGATAGGACGAA	TTTTGTCCTGACTCATCTGTTACATAAGAGGTGTTCTGAA	chrX:12502714-12502754	GAATCGTCCAGCTAGTACGT
chrX_C4	CGATTACCCGATAGGACGAACCCCACATCCTTACCTAAAGTAGCCCCAGAAATAAGAACAGAATCGTCCAGCTAGTACGT	CGATTACCCGATAGGACGAA	CCCCACATCCTTACCTAAAGTAGCCCCAGAAATAAGAACA	chrX:12502765-12502805	GAATCGTCCAGCTAGTACGT
chrX_C4	CGATTACCCGATAGGACGAAAAAACACACAAACAGTATTTGAACGGGGAGCCTAGGAATAGAATCGTCCAGCTAGTACGT	CGATTACCCGATAGGACGAA	AAAACACACAAACAGTATTTGAACGGGGAGCCTAGGAATA	chrX:12502808-12502848	GAATCGTCCAGCTAGTACGT
chrX_C4	CGATTACCCGATAGGACGAAGTAAGGTGCACAAGGAGAGACAGGGCATGGGGAATCAGTCGAATCGTCCAGCTAGTACGT	CGATTACCCGATAGGACGAA	GTAAGGTGCACAAGGAGAGACAGGGCATGGGGAATCAGTC	chrX:12502850-12502890	GAATCGTCCAGCTAGTACGT
chrX_C4	CGATTACCCGATAGGACGAACAAAGGAACGGTTACCGGCTGGGGTAGAAATTCTTGTGGTGAATCGTCCAGCTAGTACGT	CGATTACCCGATAGGACGAA	CAAAGGAACGGTTACCGGCTGGGGTAGAAATTCTTGTGGT	chrX:12502892-12502932	GAATCGTCCAGCTAGTACGT
chrX_C4	CGATTACCCGATAGGACGAAAGTGCTGAGAAGACAAGACAGTCAGCTCCCTGGGGCTGCCGAATCGTCCAGCTAGTACGT	CGATTACCCGATAGGACGAA	AGTGCTGAGAAGACAAGACAGTCAGCTCCCTGGGGCTGCC	chrX:12503027-12503067	GAATCGTCCAGCTAGTACGT
chrX_C4	CGATTACCCGATAGGACGAATCAAAATACAAGGCAAACCATGACTGAGAGATGACAGCTAGAATCGTCCAGCTAGTACGT	CGATTACCCGATAGGACGAA	TCAAAATACAAGGCAAACCATGACTGAGAGATGACAGCTA	chrX:12503119-12503159	GAATCGTCCAGCTAGTACGT
chrX_C4	CGATTACCCGATAGGACGAAGCTGTCTTCTGGCCACCTCTGTGAGTCATGGAGGACCTCAGAATCGTCCAGCTAGTACGT	CGATTACCCGATAGGACGAA	GCTGTCTTCTGGCCACCTCTGTGAGTCATGGAGGACCTCA	chrX:12503161-12503201	GAATCGTCCAGCTAGTACGT
chrX_C4	CGATTACCCGATAGGACGAATGGGCACAGTCCATGGGGCATCTAGATTGTATGATGTTTTGGTGTACGAACGTATTCCGA	CGATTACCCGATAGGACGAA	TGGGCACAGTCCATGGGGCATCTAGATTGTATGATGTTTT	chrX:13496192-13496232	GGTGTACGAACGTATTCCGA
chrX_C4	CGATTACCCGATAGGACGAACTGCCACTGAAGCACACCCACAGCCCTGCTTTTGTGTCCCGGTGTACGAACGTATTCCGA	CGATTACCCGATAGGACGAA	CTGCCACTGAAGCACACCCACAGCCCTGCTTTTGTGTCCC	chrX:13496283-13496323	GGTGTACGAACGTATTCCGA
chrX_C4	CGATTACCCGATAGGACGAAGCAGCAGCAGGAGCTGCTTCCCCTTGAGATAGCCCTCCTTGGTGTACGAACGTATTCCGA	CGATTACCCGATAGGACGAA	GCAGCAGCAGGAGCTGCTTCCCCTTGAGATAGCCCTCCTT	chrX:13496325-13496365	GGTGTACGAACGTATTCCGA
chrX_C4	CGATTACCCGATAGGACGAACTCTCCCTGGCTGGGTTGATTTGAGTTTTCATCTAATTCTGGTGTACGAACGTATTCCGA	CGATTACCCGATAGGACGAA	CTCTCCCTGGCTGGGTTGATTTGAGTTTTCATCTAATTCT	chrX:13496367-13496407	GGTGTACGAACGTATTCCGA
chrX_C4	CGATTACCCGATAGGACGAATCTCCCTAACACACCATACACAATCAGCCCCTGATCTGGAGGTGTACGAACGTATTCCGA	CGATTACCCGATAGGACGAA	TCTCCCTAACACACCATACACAATCAGCCCCTGATCTGGA	chrX:13496409-13496449	GGTGTACGAACGTATTCCGA
chrX_C4	CGATTACCCGATAGGACGAAAGCAGTCTGGTGTTTGCTTCTCTGTGGTTTGAGGTACAGGGGTGTACGAACGTATTCCGA	CGATTACCCGATAGGACGAA	AGCAGTCTGGTGTTTGCTTCTCTGTGGTTTGAGGTACAGG	chrX:13496451-13496491	GGTGTACGAACGTATTCCGA
chrX_C4	CGATTACCCGATAGGACGAAGAGTGAGGCCTGGCCTTTGGTCTCTTCCCTCCCCAGCCCCGGTGTACGAACGTATTCCGA	CGATTACCCGATAGGACGAA	GAGTGAGGCCTGGCCTTTGGTCTCTTCCCTCCCCAGCCCC	chrX:13496494-13496534	GGTGTACGAACGTATTCCGA
chrX_C4	CGATTACCCGATAGGACGAACCAACTTCAGTTCCTGAATGAAAGCGACCTCTGTTCCTTCGGTGTACGAACGTATTCCGA	CGATTACCCGATAGGACGAA	CCAACTTCAGTTCCTGAATGAAAGCGACCTCTGTTCCTTC	chrX:13496536-13496576	GGTGTACGAACGTATTCCGA
chrX_C4	CGATTACCCGATAGGACGAATTTGTGCTCCAGGCAAATGAAATTGAAAGGCACTCGCAGTGGTGTACGAACGTATTCCGA	CGATTACCCGATAGGACGAA	TTTGTGCTCCAGGCAAATGAAATTGAAAGGCACTCGCAGT	chrX:13496578-13496618	GGTGTACGAACGTATTCCGA
chrX_C4	CGATTACCCGATAGGACGAACATACAATTTTGAAGGGCATTCCCTTGAAATTTTGCTGACGGTGTACGAACGTATTCCGA	CGATTACCCGATAGGACGAA	CATACAATTTTGAAGGGCATTCCCTTGAAATTTTGCTGAC	chrX:13496620-13496660	GGTGTACGAACGTATTCCGA
chrX_C4	CGATTACCCGATAGGACGAAAAAACTGTGTTCCTAAGAGGAGAAAACGAGTTGTTTATAGGGTGTACGAACGTATTCCGA	CGATTACCCGATAGGACGAA	AAAACTGTGTTCCTAAGAGGAGAAAACGAGTTGTTTATAG	chrX:13496664-13496704	GGTGTACGAACGTATTCCGA
chrX_C4	CGATTACCCGATAGGACGAATTTTCTCCATCCTTGCCACTGGTGGTGGTGTTCCCTATTGGGTGTACGAACGTATTCCGA	CGATTACCCGATAGGACGAA	TTTTCTCCATCCTTGCCACTGGTGGTGGTGTTCCCTATTG	chrX:13496753-13496793	GGTGTACGAACGTATTCCGA
chrX_C4	CGATTACCCGATAGGACGAACTGTAAATAGCTCCTCACACCCCACTTTTCTGTTGTGGTTGGTGTACGAACGTATTCCGA	CGATTACCCGATAGGACGAA	CTGTAAATAGCTCCTCACACCCCACTTTTCTGTTGTGGTT	chrX:13496795-13496835	GGTGTACGAACGTATTCCGA
chrX_C4	CGATTACCCGATAGGACGAAGGCTAGCTTTGAATTCACGACAACCCTCCTGCCCCAGTCCGGTGTACGAACGTATTCCGA	CGATTACCCGATAGGACGAA	GGCTAGCTTTGAATTCACGACAACCCTCCTGCCCCAGTCC	chrX:13496865-13496905	GGTGTACGAACGTATTCCGA
chrX_C4	CGATTACCCGATAGGACGAAAGATGACAGGCATGAGTCACTCACGGTACCTGGTTCTTATGGTGTACGAACGTATTCCGA	CGATTACCCGATAGGACGAA	AGATGACAGGCATGAGTCACTCACGGTACCTGGTTCTTAT	chrX:13496916-13496956	GGTGTACGAACGTATTCCGA
chrX_C4	CGATTACCCGATAGGACGAACCCACTTTTGGTCATGGAACTAGTAGATGCTACCAGTCTTGGTGTACGAACGTATTCCGA	CGATTACCCGATAGGACGAA	CCCACTTTTGGTCATGGAACTAGTAGATGCTACCAGTCTT	chrX:13496958-13496998	GGTGTACGAACGTATTCCGA
chrX_C4	CGATTACCCGATAGGACGAAACAAACACCAAAATTGCTCAGTGTAGCTCAGTGGTATAGTGGTGTACGAACGTATTCCGA	CGATTACCCGATAGGACGAA	ACAAACACCAAAATTGCTCAGTGTAGCTCAGTGGTATAGT	chrX:13497005-13497045	GGTGTACGAACGTATTCCGA
chrX_C4	CGATTACCCGATAGGACGAAGTGGGAGGCTGTGGACTCAGTCCTCAGCAACCCCTTCCCCGGTGTACGAACGTATTCCGA	CGATTACCCGATAGGACGAA	GTGGGAGGCTGTGGACTCAGTCCTCAGCAACCCCTTCCCC	chrX:13497056-13497096	GGTGTACGAACGTATTCCGA
chrX_C4	CGATTACCCGATAGGACGAATTGGTTCCTTTTCCTGTTGCTGTGATAAAGTAGTCCGATGGGTGTACGAACGTATTCCGA	CGATTACCCGATAGGACGAA	TTGGTTCCTTTTCCTGTTGCTGTGATAAAGTAGTCCGATG	chrX:13497104-13497144	GGTGTACGAACGTATTCCGA
chrX_C4	CGATTACCCGATAGGACGAATTTACTCATAATTAAATGTACAGGGAAGTCAAGACAGCAGGGTGTACGAACGTATTCCGA	CGATTACCCGATAGGACGAA	TTTACTCATAATTAAATGTACAGGGAAGTCAAGACAGCAG	chrX:13497172-13497212	GGTGTACGAACGTATTCCGA
chrX_C4	CGATTACCCGATAGGACGAAGGTCACATTGCACCCACATTCCAGAAACAGAGACAAATGCGGTGTACGAACGTATTCCGA	CGATTACCCGATAGGACGAA	GGTCACATTGCACCCACATTCCAGAAACAGAGACAAATGC	chrX:13497227-13497267	GGTGTACGAACGTATTCCGA
chrX_C4	CGATTACCCGATAGGACGAAGAGTCCTTCCTACCTCAGTCAAGATAATCATGATAATCCTGGTGTACGAACGTATTCCGA	CGATTACCCGATAGGACGAA	GAGTCCTTCCTACCTCAGTCAAGATAATCATGATAATCCT	chrX:13497317-13497357	GGTGTACGAACGTATTCCGA
chrX_C4	CGATTACCCGATAGGACGAACCGGGCAGGCGGGCTCAGAGGCCCAATTCCCAAGAGATTCGGTGTACGAACGTATTCCGA	CGATTACCCGATAGGACGAA	CCGGGCAGGCGGGCTCAGAGGCCCAATTCCCAAGAGATTC	chrX:13497359-13497399	GGTGTACGAACGTATTCCGA
chrX_C4	CGATTACCCGATAGGACGAAGAGTTTGTTGCCATTAACACTAATCACTACTCCCACCTCAGGTGTACGAACGTATTCCGA	CGATTACCCGATAGGACGAA	GAGTTTGTTGCCATTAACACTAATCACTACTCCCACCTCA	chrX:13497401-13497441	GGTGTACGAACGTATTCCGA
chrX_C4	CGATTACCCGATAGGACGAAAAGTAACATGTGTCAGAAGTAGTGAAAATGTGTTTACAGGGGTGTACGAACGTATTCCGA	CGATTACCCGATAGGACGAA	AAGTAACATGTGTCAGAAGTAGTGAAAATGTGTTTACAGG	chrX:13497451-13497491	GGTGTACGAACGTATTCCGA
chrX_C4	CGATTACCCGATAGGACGAAATATCCTTGTGCACTACAATTTTGTTTGTTTTCAAGACGGGGTGTACGAACGTATTCCGA	CGATTACCCGATAGGACGAA	ATATCCTTGTGCACTACAATTTTGTTTGTTTTCAAGACGG	chrX:13497507-13497547	GGTGTACGAACGTATTCCGA
chrX_C4	CGATTACCCGATAGGACGAACAGCAGACCAGACTGGTTTTGGCCTGCCTCTGTCTCCCCTGGTGTACGAACGTATTCCGA	CGATTACCCGATAGGACGAA	CAGCAGACCAGACTGGTTTTGGCCTGCCTCTGTCTCCCCT	chrX:13497583-13497623	GGTGTACGAACGTATTCCGA
chrX_C4	CGATTACCCGATAGGACGAAAGGCATGTGTCACTGTACCTGGTTAATTTGAACTATTAAAGGTGTACGAACGTATTCCGA	CGATTACCCGATAGGACGAA	AGGCATGTGTCACTGTACCTGGTTAATTTGAACTATTAAA	chrX:13497630-13497670	GGTGTACGAACGTATTCCGA
chrX_C4	CGATTACCCGATAGGACGAAAGGGTCACAGATCTCTCTGATTCTGATTCCTTCTTGTTTTGGTGTACGAACGTATTCCGA	CGATTACCCGATAGGACGAA	AGGGTCACAGATCTCTCTGATTCTGATTCCTTCTTGTTTT	chrX:13497672-13497712	GGTGTACGAACGTATTCCGA
chrX_C4	CGATTACCCGATAGGACGAAAAAAGGAGATGTGGAATTGGCCAGTCTCTTTTCTCACACCGGTGTACGAACGTATTCCGA	CGATTACCCGATAGGACGAA	AAAAGGAGATGTGGAATTGGCCAGTCTCTTTTCTCACACC	chrX:13497724-13497764	GGTGTACGAACGTATTCCGA
chrX_C4	CGATTACCCGATAGGACGAACAGAACACATGCCTTCCTTGTGCTCTCACATAGTTAGATCGGTGTACGAACGTATTCCGA	CGATTACCCGATAGGACGAA	CAGAACACATGCCTTCCTTGTGCTCTCACATAGTTAGATC	chrX:13497766-13497806	GGTGTACGAACGTATTCCGA
chrX_C4	CGATTACCCGATAGGACGAAAAAAGTTAGACCAGAAGTTTGGAAGATCACCTGGGCAATTGGTGTACGAACGTATTCCGA	CGATTACCCGATAGGACGAA	AAAAGTTAGACCAGAAGTTTGGAAGATCACCTGGGCAATT	chrX:13497809-13497849	GGTGTACGAACGTATTCCGA
chrX_C4	CGATTACCCGATAGGACGAAAAGGATGCACATCCAAGCTGCTAATGAGTGCTCAGCTCCTGGTGTACGAACGTATTCCGA	CGATTACCCGATAGGACGAA	AAGGATGCACATCCAAGCTGCTAATGAGTGCTCAGCTCCT	chrX:13497851-13497891	GGTGTACGAACGTATTCCGA
chrX_C4	CGATTACCCGATAGGACGAAATAAGTTAATAGCTATTAGTGAGAATGTCCTTGAGTGACCGGTGTACGAACGTATTCCGA	CGATTACCCGATAGGACGAA	ATAAGTTAATAGCTATTAGTGAGAATGTCCTTGAGTGACC	chrX:13497914-13497954	GGTGTACGAACGTATTCCGA
chrX_C4	CGATTACCCGATAGGACGAACCTGGTGTCCTGCAGTGATACCTATTATTAATTCTCTTAAGGTGTACGAACGTATTCCGA	CGATTACCCGATAGGACGAA	CCTGGTGTCCTGCAGTGATACCTATTATTAATTCTCTTAA	chrX:13497956-13497996	GGTGTACGAACGTATTCCGA
chrX_C4	CGATTACCCGATAGGACGAAAACCCAAATACCCAAGGAGGAATAACTACAGATTGTCATTGGTGTACGAACGTATTCCGA	CGATTACCCGATAGGACGAA	AACCCAAATACCCAAGGAGGAATAACTACAGATTGTCATT	chrX:13498008-13498048	GGTGTACGAACGTATTCCGA
chrX_C4	CGATTACCCGATAGGACGAATCGGAGGAACCCCATTATGTCAACTCTGTACCCCATTCCTGGTGTACGAACGTATTCCGA	CGATTACCCGATAGGACGAA	TCGGAGGAACCCCATTATGTCAACTCTGTACCCCATTCCT	chrX:13498050-13498090	GGTGTACGAACGTATTCCGA
chrX_C4	CGATTACCCGATAGGACGAATGTTATGTATACCTGCCGTTGCCAAAACTTTTCTCTCTTTGGTGTACGAACGTATTCCGA	CGATTACCCGATAGGACGAA	TGTTATGTATACCTGCCGTTGCCAAAACTTTTCTCTCTTT	chrX:13498092-13498132	GGTGTACGAACGTATTCCGA
chrX_C4	CGATTACCCGATAGGACGAATTCAAAATGTGTGTTCCTCTGGAAATGAGATGGTTACCATGGTGTACGAACGTATTCCGA	CGATTACCCGATAGGACGAA	TTCAAAATGTGTGTTCCTCTGGAAATGAGATGGTTACCAT	chrX:13498134-13498174	GGTGTACGAACGTATTCCGA
chrX_C4	CGATTACCCGATAGGACGAATCCATGGTGTATTGTGTGCCTAGTAGGGAGTCAGTTCAGAGGTGTACGAACGTATTCCGA	CGATTACCCGATAGGACGAA	TCCATGGTGTATTGTGTGCCTAGTAGGGAGTCAGTTCAGA	chrX:13498176-13498216	GGTGTACGAACGTATTCCGA
chrX_C4	CGATTACCCGATAGGACGAACCCACTCCCGCTTCATGGCCCTCCAGAAAGATTTTGCTGAGGTGTACGAACGTATTCCGA	CGATTACCCGATAGGACGAA	CCCACTCCCGCTTCATGGCCCTCCAGAAAGATTTTGCTGA	chrX:13498343-13498383	GGTGTACGAACGTATTCCGA
chrX_C4	CGATTACCCGATAGGACGAATAGCTGTCTCATATGAGGCTATGTCATCTAGTCTTATAACGGTGTACGAACGTATTCCGA	CGATTACCCGATAGGACGAA	TAGCTGTCTCATATGAGGCTATGTCATCTAGTCTTATAAC	chrX:13498396-13498436	GGTGTACGAACGTATTCCGA
chrX_C4	CGATTACCCGATAGGACGAATCCTGCAGGATAGGCAGTTACACCCATCTTACAAATGTGGGGTGTACGAACGTATTCCGA	CGATTACCCGATAGGACGAA	TCCTGCAGGATAGGCAGTTACACCCATCTTACAAATGTGG	chrX:13498438-13498478	GGTGTACGAACGTATTCCGA
chrX_C4	CGATTACCCGATAGGACGAAACTGAGGTTTAGAGGTTCAAGTGACTTGGCAAAGGTCCATGGTGTACGAACGTATTCCGA	CGATTACCCGATAGGACGAA	ACTGAGGTTTAGAGGTTCAAGTGACTTGGCAAAGGTCCAT	chrX:13498480-13498520	GGTGTACGAACGTATTCCGA
chrX_C4	CGATTACCCGATAGGACGAAGTATATGGCAAAACTGGTATTTGAATATATGTCTCAGCTCGGTGTACGAACGTATTCCGA	CGATTACCCGATAGGACGAA	GTATATGGCAAAACTGGTATTTGAATATATGTCTCAGCTC	chrX:13498525-13498565	GGTGTACGAACGTATTCCGA
chrX_C4	CGATTACCCGATAGGACGAAGATTCCAAGTCAATGTCCTTGCTCTCCACAGTAAGGGGACGGTGTACGAACGTATTCCGA	CGATTACCCGATAGGACGAA	GATTCCAAGTCAATGTCCTTGCTCTCCACAGTAAGGGGAC	chrX:13498567-13498607	GGTGTACGAACGTATTCCGA
chrX_C4	CGATTACCCGATAGGACGAAACAGTTCTCTTCTGGAGCTCACAATGGAAGGTTGGAAGGAGGTGTACGAACGTATTCCGA	CGATTACCCGATAGGACGAA	ACAGTTCTCTTCTGGAGCTCACAATGGAAGGTTGGAAGGA	chrX:13498609-13498649	GGTGTACGAACGTATTCCGA
chrX_C4	CGATTACCCGATAGGACGAAAAAATGATTCCCAAAGAACTGGCCTCTGGCTTAGTCATTGGGTGTACGAACGTATTCCGA	CGATTACCCGATAGGACGAA	AAAATGATTCCCAAAGAACTGGCCTCTGGCTTAGTCATTG	chrX:13498655-13498695	GGTGTACGAACGTATTCCGA
chrX_C4	CGATTACCCGATAGGACGAATTCATCACTTTGACAAATATTTTAGAGGAGCCAGGCAGTGGGTGTACGAACGTATTCCGA	CGATTACCCGATAGGACGAA	TTCATCACTTTGACAAATATTTTAGAGGAGCCAGGCAGTG	chrX:13498697-13498737	GGTGTACGAACGTATTCCGA
chrX_C4	CGATTACCCGATAGGACGAAAGAGAAACCCTAACTGGGTGATGGAGGATGGGCGATGGCAGGTGTACGAACGTATTCCGA	CGATTACCCGATAGGACGAA	AGAGAAACCCTAACTGGGTGATGGAGGATGGGCGATGGCA	chrX:13498846-13498886	GGTGTACGAACGTATTCCGA
chrX_C4	CGATTACCCGATAGGACGAAGGAACAACCTGACAGGAGCCACTTAAAGAAGACAAGATTGGGTGTACGAACGTATTCCGA	CGATTACCCGATAGGACGAA	GGAACAACCTGACAGGAGCCACTTAAAGAAGACAAGATTG	chrX:13498888-13498928	GGTGTACGAACGTATTCCGA
chrX_C4	CGATTACCCGATAGGACGAATCTGACTCTCAGTTGCAGAGAATTTCAATCCATAGTACTAGGTGTACGAACGTATTCCGA	CGATTACCCGATAGGACGAA	TCTGACTCTCAGTTGCAGAGAATTTCAATCCATAGTACTA	chrX:13498930-13498970	GGTGTACGAACGTATTCCGA
chrX_C4	CGATTACCCGATAGGACGAAAAGGGATGGCTGAGTGGCTTGGACGGTGGAGTGTACATTAGGTGTACGAACGTATTCCGA	CGATTACCCGATAGGACGAA	AAGGGATGGCTGAGTGGCTTGGACGGTGGAGTGTACATTA	chrX:13498973-13499013	GGTGTACGAACGTATTCCGA
chrX_C4	CGATTACCCGATAGGACGAAGATTTCCCCTATGACTGCGGTATATAGGAAACAAAGAGCTGGTGTACGAACGTATTCCGA	CGATTACCCGATAGGACGAA	GATTTCCCCTATGACTGCGGTATATAGGAAACAAAGAGCT	chrX:13499015-13499055	GGTGTACGAACGTATTCCGA
chrX_C4	CGATTACCCGATAGGACGAAGCTAACCAGGAACTAATACTGGGGTTGGGTTGAGGTTTTGGGTGTACGAACGTATTCCGA	CGATTACCCGATAGGACGAA	GCTAACCAGGAACTAATACTGGGGTTGGGTTGAGGTTTTG	chrX:13499057-13499097	GGTGTACGAACGTATTCCGA
chrX_C4	CGATTACCCGATAGGACGAAGGGCAGAAGAGACATTGGTGGGGTTGACATTTTACAGGCAGGTGTACGAACGTATTCCGA	CGATTACCCGATAGGACGAA	GGGCAGAAGAGACATTGGTGGGGTTGACATTTTACAGGCA	chrX:13499215-13499255	GGTGTACGAACGTATTCCGA
chrX_C4	CGATTACCCGATAGGACGAACCAGCTATTGTGCTGCTTAAGATAAGGCTGTGTGTGTCTTGGTGTACGAACGTATTCCGA	CGATTACCCGATAGGACGAA	CCAGCTATTGTGCTGCTTAAGATAAGGCTGTGTGTGTCTT	chrX:13499491-13499531	GGTGTACGAACGTATTCCGA
chrX_C4	CGATTACCCGATAGGACGAATGGGGAAGAAGCCCTGCCTGGGACTTTTAATATTTCTACTGGTGTACGAACGTATTCCGA	CGATTACCCGATAGGACGAA	TGGGGAAGAAGCCCTGCCTGGGACTTTTAATATTTCTACT	chrX:13499558-13499598	GGTGTACGAACGTATTCCGA
chrX_C4	CGATTACCCGATAGGACGAAAGGGTTGGCCTGTACCATCTATAAGGCCTGGCCTTAGTGAGGTGTACGAACGTATTCCGA	CGATTACCCGATAGGACGAA	AGGGTTGGCCTGTACCATCTATAAGGCCTGGCCTTAGTGA	chrX:13499600-13499640	GGTGTACGAACGTATTCCGA
chrX_C4	CGATTACCCGATAGGACGAACCTCCACCCAGGCCCCACCTCCTGAACAATGGTTCCCAACGGTGTACGAACGTATTCCGA	CGATTACCCGATAGGACGAA	CCTCCACCCAGGCCCCACCTCCTGAACAATGGTTCCCAAC	chrX:13499647-13499687	GGTGTACGAACGTATTCCGA
chrX_C4	CGATTACCCGATAGGACGAAGCATTGGGAAAGTTGAGAACTACTATAAGGTTTTATAGCCGGTGTACGAACGTATTCCGA	CGATTACCCGATAGGACGAA	GCATTGGGAAAGTTGAGAACTACTATAAGGTTTTATAGCC	chrX:13499835-13499875	GGTGTACGAACGTATTCCGA
chrX_C4	CGATTACCCGATAGGACGAACAAAATACCTCCACAAGCTGGGGATAAAACTTGAATCATTGGTGTACGAACGTATTCCGA	CGATTACCCGATAGGACGAA	CAAAATACCTCCACAAGCTGGGGATAAAACTTGAATCATT	chrX:13499877-13499917	GGTGTACGAACGTATTCCGA
chrX_C4	CGATTACCCGATAGGACGAACCATGCTGAACACACAGCCTTGTGGCAAGTGGATGTTTATGGTGTACGAACGTATTCCGA	CGATTACCCGATAGGACGAA	CCATGCTGAACACACAGCCTTGTGGCAAGTGGATGTTTAT	chrX:13499919-13499959	GGTGTACGAACGTATTCCGA
chrX_C4	CGATTACCCGATAGGACGAACTGATAGATTCTCATCAAAATTCAAGTGTTATGCTGCAACGGTGTACGAACGTATTCCGA	CGATTACCCGATAGGACGAA	CTGATAGATTCTCATCAAAATTCAAGTGTTATGCTGCAAC	chrX:13500092-13500132	GGTGTACGAACGTATTCCGA
chrX_C4	CGATTACCCGATAGGACGAAGCCATGCATTTAACATGGATGCATAAGTTACAGGGCTGGTGGTGTACGAACGTATTCCGA	CGATTACCCGATAGGACGAA	GCCATGCATTTAACATGGATGCATAAGTTACAGGGCTGGT	chrX:13500134-13500174	GGTGTACGAACGTATTCCGA
chrX_C4	CGATTACCCGATAGGACGAAAAAACACTTATTCCTAAACCTGACTTTAATCCCAGGGACTGGTGTACGAACGTATTCCGA	CGATTACCCGATAGGACGAA	AAAACACTTATTCCTAAACCTGACTTTAATCCCAGGGACT	chrX:13500192-13500232	GGTGTACGAACGTATTCCGA
chrX_C4	CGATTACCCGATAGGACGAACATGTCAAGGCATGCATGGGTCAACACATACACAAAACAGGGTGTACGAACGTATTCCGA	CGATTACCCGATAGGACGAA	CATGTCAAGGCATGCATGGGTCAACACATACACAAAACAG	chrX:13500287-13500327	GGTGTACGAACGTATTCCGA
chrX_C4	CGATTACCCGATAGGACGAAAGACAGACAGGCAATAAATTACAGACTGCAAACCACATAGGGTGTACGAACGTATTCCGA	CGATTACCCGATAGGACGAA	AGACAGACAGGCAATAAATTACAGACTGCAAACCACATAG	chrX:13500332-13500372	GGTGTACGAACGTATTCCGA
chrX_C4	CGATTACCCGATAGGACGAACAAAGGGCCCTCAAAACTCAACAGTGAAAACGACAATAGTGGTGTACGAACGTATTCCGA	CGATTACCCGATAGGACGAA	CAAAGGGCCCTCAAAACTCAACAGTGAAAACGACAATAGT	chrX:13500376-13500416	GGTGTACGAACGTATTCCGA
chrX_C4	CGATTACCCGATAGGACGAAAATGGGCAGAAGTCATAGACAGACCTACATGCAGAGATGGGGTGTACGAACGTATTCCGA	CGATTACCCGATAGGACGAA	AATGGGCAGAAGTCATAGACAGACCTACATGCAGAGATGG	chrX:13500426-13500466	GGTGTACGAACGTATTCCGA
chrX_C4	CGATTACCCGATAGGACGAAAACAAACATATGCAAAGACACTCGGCATCACCACCCAGGCGGTGTACGAACGTATTCCGA	CGATTACCCGATAGGACGAA	AACAAACATATGCAAAGACACTCGGCATCACCACCCAGGC	chrX:13500468-13500508	GGTGTACGAACGTATTCCGA
chrX_C4	CGATTACCCGATAGGACGAAAAAATAAAACCCAATGATGACACCCGATGCTGGTGGCTCAGGTGTACGAACGTATTCCGA	CGATTACCCGATAGGACGAA	AAAATAAAACCCAATGATGACACCCGATGCTGGTGGCTCA	chrX:13500538-13500578	GGTGTACGAACGTATTCCGA
chrX_C4	CGATTACCCGATAGGACGAATATGAAAGTGCAGCTAGCCATTCTGGAAGAAATGTGGCAAGGTGTACGAACGTATTCCGA	CGATTACCCGATAGGACGAA	TATGAAAGTGCAGCTAGCCATTCTGGAAGAAATGTGGCAA	chrX:13500580-13500620	GGTGTACGAACGTATTCCGA
chrX_C4	CGATTACCCGATAGGACGAACTTACAAAATCAAACACACAACCACCATGCAGTGTAGCACGGTGTACGAACGTATTCCGA	CGATTACCCGATAGGACGAA	CTTACAAAATCAAACACACAACCACCATGCAGTGTAGCAC	chrX:13500623-13500663	GGTGTACGAACGTATTCCGA
chrX_C4	CGATTACCCGATAGGACGAAGCCCCTTCATCCTACTGAAATGAAAACTTACAGTCACACGGGTGTACGAACGTATTCCGA	CGATTACCCGATAGGACGAA	GCCCCTTCATCCTACTGAAATGAAAACTTACAGTCACACG	chrX:13500673-13500713	GGTGTACGAACGTATTCCGA
chrX_C4	CGATTACCCGATAGGACGAAGACCTACATATGAATAGAATGATCATAGCAGTTTGACTCAGGTGTACGAACGTATTCCGA	CGATTACCCGATAGGACGAA	GACCTACATATGAATAGAATGATCATAGCAGTTTGACTCA	chrX:13500715-13500755	GGTGTACGAACGTATTCCGA
chrX_C4	CGATTACCCGATAGGACGAAATAGCCAAAAGAGGGAAAACCAGCTAGATGTCTGTTCAACGGTGTACGAACGTATTCCGA	CGATTACCCGATAGGACGAA	ATAGCCAAAAGAGGGAAAACCAGCTAGATGTCTGTTCAAC	chrX:13500757-13500797	GGTGTACGAACGTATTCCGA
chrX_C4	CGATTACCCGATAGGACGAAAATCATATTCACTCCTCACTTTAATTCAAACTCTTCCCAGGGTGTACGAACGTATTCCGA	CGATTACCCGATAGGACGAA	AATCATATTCACTCCTCACTTTAATTCAAACTCTTCCCAG	chrX:13500932-13500972	GGTGTACGAACGTATTCCGA
chrX_C4	CGATTACCCGATAGGACGAACTCTCTCACTGTGTCCTGTCCTGATTTGGTTTCTATTGCTGGTGTACGAACGTATTCCGA	CGATTACCCGATAGGACGAA	CTCTCTCACTGTGTCCTGTCCTGATTTGGTTTCTATTGCT	chrX:13500974-13501014	GGTGTACGAACGTATTCCGA
chrX_C4	CGATTACCCGATAGGACGAAGGTTTGTCCCTGGTGGTTTTCTCAGCTTGCATTTTGTACAGGTGTACGAACGTATTCCGA	CGATTACCCGATAGGACGAA	GGTTTGTCCCTGGTGGTTTTCTCAGCTTGCATTTTGTACA	chrX:13501149-13501189	GGTGTACGAACGTATTCCGA
chrX_C4	CGATTACCCGATAGGACGAAGAGGTGGTGCTGCCCACAACGGGTTGAACTTTCTTATCCCGGTGTACGAACGTATTCCGA	CGATTACCCGATAGGACGAA	GAGGTGGTGCTGCCCACAACGGGTTGAACTTTCTTATCCC	chrX:13501208-13501248	GGTGTACGAACGTATTCCGA
chrX_C4	CGATTACCCGATAGGACGAAGAGTACAATTAGTGCTGCTTATGAATGTCTATAGGGCCATGGTGTACGAACGTATTCCGA	CGATTACCCGATAGGACGAA	GAGTACAATTAGTGCTGCTTATGAATGTCTATAGGGCCAT	chrX:13501375-13501415	GGTGTACGAACGTATTCCGA
chrX_C4	CGATTACCCGATAGGACGAAAATGGAGCATCAGGGGCCCACCTACCTGAAGAAAACTGTTGGTGTACGAACGTATTCCGA	CGATTACCCGATAGGACGAA	AATGGAGCATCAGGGGCCCACCTACCTGAAGAAAACTGTT	chrX:13501417-13501457	GGTGTACGAACGTATTCCGA
chrX_C4	CGATTACCCGATAGGACGAACCCCTCCATCAGACAATAATTGCCAATTATTCCTTTGACAGGTGTACGAACGTATTCCGA	CGATTACCCGATAGGACGAA	CCCCTCCATCAGACAATAATTGCCAATTATTCCTTTGACA	chrX:13501459-13501499	GGTGTACGAACGTATTCCGA
chrX_C4	CGATTACCCGATAGGACGAACCCCATTCATGCTCCATGTGTATACACACACAGGTGCACAGGTGTACGAACGTATTCCGA	CGATTACCCGATAGGACGAA	CCCCATTCATGCTCCATGTGTATACACACACAGGTGCACA	chrX:13501513-13501553	GGTGTACGAACGTATTCCGA
chrX_C4	CGATTACCCGATAGGACGAACTCCTGGGAACGGAGCTCAGGACCTTGTACATATCCATCCGGTGTACGAACGTATTCCGA	CGATTACCCGATAGGACGAA	CTCCTGGGAACGGAGCTCAGGACCTTGTACATATCCATCC	chrX:13501555-13501595	GGTGTACGAACGTATTCCGA
chrX_C4	CGATTACCCGATAGGACGAATTTTGGTTCCTCTCAGCTTTCATGACATCTGATTCCCCAGGGTGTACGAACGTATTCCGA	CGATTACCCGATAGGACGAA	TTTTGGTTCCTCTCAGCTTTCATGACATCTGATTCCCCAG	chrX:13501620-13501660	GGTGTACGAACGTATTCCGA
chrX_C4	CGATTACCCGATAGGACGAACATTTTGCTGCACTGTCATGATTTGATTTCTCTGTATTTGGGTGTACGAACGTATTCCGA	CGATTACCCGATAGGACGAA	CATTTTGCTGCACTGTCATGATTTGATTTCTCTGTATTTG	chrX:13501666-13501706	GGTGTACGAACGTATTCCGA
chrX_C4	CGATTACCCGATAGGACGAAATGTCTGTAGCACACTTTCTGTCTCCATCCATCTATCATTGGTGTACGAACGTATTCCGA	CGATTACCCGATAGGACGAA	ATGTCTGTAGCACACTTTCTGTCTCCATCCATCTATCATT	chrX:13501722-13501762	GGTGTACGAACGTATTCCGA
chrX_C4	CGATTACCCGATAGGACGAAGAGGAGTGCAGCAGAGATGCACATGATTGTCTTTCGAGATGGTGTACGAACGTATTCCGA	CGATTACCCGATAGGACGAA	GAGGAGTGCAGCAGAGATGCACATGATTGTCTTTCGAGAT	chrX:13501764-13501804	GGTGTACGAACGTATTCCGA
chrX_C4	CGATTACCCGATAGGACGAAGCAATCAACATCTTGGGGACTTCAGCTCAACTTCTTTGCAGGTGTACGAACGTATTCCGA	CGATTACCCGATAGGACGAA	GCAATCAACATCTTGGGGACTTCAGCTCAACTTCTTTGCA	chrX:13501806-13501846	GGTGTACGAACGTATTCCGA
chrX_C4	CGATTACCCGATAGGACGAACCCCTCATAGGGGTCATAAGACCCTCACCCAAATATCCAGGGTGTACGAACGTATTCCGA	CGATTACCCGATAGGACGAA	CCCCTCATAGGGGTCATAAGACCCTCACCCAAATATCCAG	chrX:13501884-13501924	GGTGTACGAACGTATTCCGA
chrX_C4	CGATTACCCGATAGGACGAAGCTCCCCACCACCTGGCACGTGCAAGACTCCCCTAATTGCGGTGTACGAACGTATTCCGA	CGATTACCCGATAGGACGAA	GCTCCCCACCACCTGGCACGTGCAAGACTCCCCTAATTGC	chrX:13501926-13501966	GGTGTACGAACGTATTCCGA
chrX_C4	CGATTACCCGATAGGACGAAGTGATCTCAGGGAGGGGCTAGAGTATATATAAGGATGGAGGGTGTACGAACGTATTCCGA	CGATTACCCGATAGGACGAA	GTGATCTCAGGGAGGGGCTAGAGTATATATAAGGATGGAG	chrX:13501968-13502008	GGTGTACGAACGTATTCCGA
chrX_C4	CGATTACCCGATAGGACGAAGGGACACTAGAGAAGGAGGACTCCATCCATGTGGCTCTAGGGTGTACGAACGTATTCCGA	CGATTACCCGATAGGACGAA	GGGACACTAGAGAAGGAGGACTCCATCCATGTGGCTCTAG	chrX:13502011-13502051	GGTGTACGAACGTATTCCGA
chrX_C4	CGATTACCCGATAGGACGAAAAGCCCTCATCCTGTGCCTGGTTGTGGGGAAGGAACACCCGGTGTACGAACGTATTCCGA	CGATTACCCGATAGGACGAA	AAGCCCTCATCCTGTGCCTGGTTGTGGGGAAGGAACACCC	chrX:13502053-13502093	GGTGTACGAACGTATTCCGA
chrX_C4	CGATTACCCGATAGGACGAAAAAAGAACTCTGCAATATGCTGTGCCACTAAAGTTGAAAGTCGTCTAGCATAACGACTCG	CGATTACCCGATAGGACGAA	AAAAGAACTCTGCAATATGCTGTGCCACTAAAGTTGAAAG	chrX:14593583-14593623	TCGTCTAGCATAACGACTCG
chrX_C4	CGATTACCCGATAGGACGAATTAGCATTTTAAGGTCACAGTAGTTTCTGTTTATGGTGGGTCGTCTAGCATAACGACTCG	CGATTACCCGATAGGACGAA	TTAGCATTTTAAGGTCACAGTAGTTTCTGTTTATGGTGGG	chrX:14593625-14593665	TCGTCTAGCATAACGACTCG
chrX_C4	CGATTACCCGATAGGACGAATGCCACCACTGCCAGACTTACATTTAAACATTTACACCTCTCGTCTAGCATAACGACTCG	CGATTACCCGATAGGACGAA	TGCCACCACTGCCAGACTTACATTTAAACATTTACACCTC	chrX:14593889-14593929	TCGTCTAGCATAACGACTCG
chrX_C4	CGATTACCCGATAGGACGAACTTGTTACCTACGTTGAAAAGCAACTCATCCATTACAGTTTCGTCTAGCATAACGACTCG	CGATTACCCGATAGGACGAA	CTTGTTACCTACGTTGAAAAGCAACTCATCCATTACAGTT	chrX:14593931-14593971	TCGTCTAGCATAACGACTCG
chrX_C4	CGATTACCCGATAGGACGAAATGAATTCTCATGATGTGAATGAATATCCTTGCAATCTGGTCGTCTAGCATAACGACTCG	CGATTACCCGATAGGACGAA	ATGAATTCTCATGATGTGAATGAATATCCTTGCAATCTGG	chrX:14593981-14594021	TCGTCTAGCATAACGACTCG
chrX_C4	CGATTACCCGATAGGACGAATCAGGTCAAGAAACAAGATGATCAGCACCCACAACACTCCTCGTCTAGCATAACGACTCG	CGATTACCCGATAGGACGAA	TCAGGTCAAGAAACAAGATGATCAGCACCCACAACACTCC	chrX:14594023-14594063	TCGTCTAGCATAACGACTCG
chrX_C4	CGATTACCCGATAGGACGAAGTACTGCCTGGCCTTCCTCTTGACCTCAAGGAATAACCCCTCGTCTAGCATAACGACTCG	CGATTACCCGATAGGACGAA	GTACTGCCTGGCCTTCCTCTTGACCTCAAGGAATAACCCC	chrX:14594065-14594105	TCGTCTAGCATAACGACTCG
chrX_C4	CGATTACCCGATAGGACGAAACACCCCTTAGTGTTTTAACTGAAGAATTAAAGAAGCCGTTCGTCTAGCATAACGACTCG	CGATTACCCGATAGGACGAA	ACACCCCTTAGTGTTTTAACTGAAGAATTAAAGAAGCCGT	chrX:14594107-14594147	TCGTCTAGCATAACGACTCG
chrX_C4	CGATTACCCGATAGGACGAATGTACGTTTTAAGGTCTGGAATTTTGTTTGCTGTCTTGGCTCGTCTAGCATAACGACTCG	CGATTACCCGATAGGACGAA	TGTACGTTTTAAGGTCTGGAATTTTGTTTGCTGTCTTGGC	chrX:14594149-14594189	TCGTCTAGCATAACGACTCG
chrX_C4	CGATTACCCGATAGGACGAATTTTATCTAGTATGCATATAGTTGCAGGCAAGTTGTTCTCTCGTCTAGCATAACGACTCG	CGATTACCCGATAGGACGAA	TTTTATCTAGTATGCATATAGTTGCAGGCAAGTTGTTCTC	chrX:14594202-14594242	TCGTCTAGCATAACGACTCG
chrX_C4	CGATTACCCGATAGGACGAATAATGTTCAGCATTCCCCATGATGTGCATCAGTGTATTACTCGTCTAGCATAACGACTCG	CGATTACCCGATAGGACGAA	TAATGTTCAGCATTCCCCATGATGTGCATCAGTGTATTAC	chrX:14594244-14594284	TCGTCTAGCATAACGACTCG
chrX_C4	CGATTACCCGATAGGACGAATTTGTTTACGTGTTCACCTAGTGGTGTGTATTTGGCTGTTTCGTCTAGCATAACGACTCG	CGATTACCCGATAGGACGAA	TTTGTTTACGTGTTCACCTAGTGGTGTGTATTTGGCTGTT	chrX:14594286-14594326	TCGTCTAGCATAACGACTCG
chrX_C4	CGATTACCCGATAGGACGAACTAGTTTGAGAGCTTAGGGATAGCACATCTATTAAACATTTCGTCTAGCATAACGACTCG	CGATTACCCGATAGGACGAA	CTAGTTTGAGAGCTTAGGGATAGCACATCTATTAAACATT	chrX:14594328-14594368	TCGTCTAGCATAACGACTCG
chrX_C4	CGATTACCCGATAGGACGAAAAAGATTATGCCTCCTTTGGTGAATTTATTGGGTGGGTATTCGTCTAGCATAACGACTCG	CGATTACCCGATAGGACGAA	AAAGATTATGCCTCCTTTGGTGAATTTATTGGGTGGGTAT	chrX:14594370-14594410	TCGTCTAGCATAACGACTCG
chrX_C4	CGATTACCCGATAGGACGAACTGATAAACTTAGCTTAGAAGTGTAGCTTCACTATTCTAGTCGTCTAGCATAACGACTCG	CGATTACCCGATAGGACGAA	CTGATAAACTTAGCTTAGAAGTGTAGCTTCACTATTCTAG	chrX:14594468-14594508	TCGTCTAGCATAACGACTCG
chrX_C4	CGATTACCCGATAGGACGAAACTTGAACAAACTCATCAAACTTTCAGAGCCTCATCTTTTTCGTCTAGCATAACGACTCG	CGATTACCCGATAGGACGAA	ACTTGAACAAACTCATCAAACTTTCAGAGCCTCATCTTTT	chrX:14594510-14594550	TCGTCTAGCATAACGACTCG
chrX_C4	CGATTACCCGATAGGACGAAAAATCTGTCAAATGGGCATTCAAATAGGGCTGCTGCAGTTTCGTCTAGCATAACGACTCG	CGATTACCCGATAGGACGAA	AAATCTGTCAAATGGGCATTCAAATAGGGCTGCTGCAGTT	chrX:14594552-14594592	TCGTCTAGCATAACGACTCG
chrX_C4	CGATTACCCGATAGGACGAATACTATGTAGTCAACATTATTTTACTCCCTGTCACAGATGTCGTCTAGCATAACGACTCG	CGATTACCCGATAGGACGAA	TACTATGTAGTCAACATTATTTTACTCCCTGTCACAGATG	chrX:14594685-14594725	TCGTCTAGCATAACGACTCG
chrX_C4	CGATTACCCGATAGGACGAAAAAATGTGTACCAACCCCATAAAGACTATTCAGAAGACCTTCGTCTAGCATAACGACTCG	CGATTACCCGATAGGACGAA	AAAATGTGTACCAACCCCATAAAGACTATTCAGAAGACCT	chrX:14594778-14594818	TCGTCTAGCATAACGACTCG
chrX_C4	CGATTACCCGATAGGACGAAGTGCTGAGCTGCACCTCTGCTATTGTTTCTTGAACCCTCATCGTCTAGCATAACGACTCG	CGATTACCCGATAGGACGAA	GTGCTGAGCTGCACCTCTGCTATTGTTTCTTGAACCCTCA	chrX:14594820-14594860	TCGTCTAGCATAACGACTCG
chrX_C4	CGATTACCCGATAGGACGAATTCTTAGCACAAATGACATGTTTGCAGTTAAGCTAACTCCTCGTCTAGCATAACGACTCG	CGATTACCCGATAGGACGAA	TTCTTAGCACAAATGACATGTTTGCAGTTAAGCTAACTCC	chrX:14594862-14594902	TCGTCTAGCATAACGACTCG
chrX_C4	CGATTACCCGATAGGACGAAGGCATTTGCTGCCATGGAGGCCAAGCAGAAAACACAGGGATCGTCTAGCATAACGACTCG	CGATTACCCGATAGGACGAA	GGCATTTGCTGCCATGGAGGCCAAGCAGAAAACACAGGGA	chrX:14594904-14594944	TCGTCTAGCATAACGACTCG
chrX_C4	CGATTACCCGATAGGACGAATAGGTTCTTTGTAAAGAACTGAAGGACTATTTCATACCTGTCGTCTAGCATAACGACTCG	CGATTACCCGATAGGACGAA	TAGGTTCTTTGTAAAGAACTGAAGGACTATTTCATACCTG	chrX:14594963-14595003	TCGTCTAGCATAACGACTCG
chrX_C4	CGATTACCCGATAGGACGAACCAGTTTGAACTCTTTGTCTACTATAGAGTATTTGGGCCATCGTCTAGCATAACGACTCG	CGATTACCCGATAGGACGAA	CCAGTTTGAACTCTTTGTCTACTATAGAGTATTTGGGCCA	chrX:14595025-14595065	TCGTCTAGCATAACGACTCG
chrX_C4	CGATTACCCGATAGGACGAAAAAATAATGCCCATTTTCTCCTTTCCATGACAATAACTCCTCGTCTAGCATAACGACTCG	CGATTACCCGATAGGACGAA	AAAATAATGCCCATTTTCTCCTTTCCATGACAATAACTCC	chrX:14595171-14595211	TCGTCTAGCATAACGACTCG
chrX_C4	CGATTACCCGATAGGACGAAAAGAAGTATCCAGAAGAAAATATTTGTAGTCCTGGTTACCTCGTCTAGCATAACGACTCG	CGATTACCCGATAGGACGAA	AAGAAGTATCCAGAAGAAAATATTTGTAGTCCTGGTTACC	chrX:14595239-14595279	TCGTCTAGCATAACGACTCG
chrX_C4	CGATTACCCGATAGGACGAATCAGAATGAAAGCATCAAATGAGAAATCCTATGTGGTATCTCGTCTAGCATAACGACTCG	CGATTACCCGATAGGACGAA	TCAGAATGAAAGCATCAAATGAGAAATCCTATGTGGTATC	chrX:14595378-14595418	TCGTCTAGCATAACGACTCG
chrX_C4	CGATTACCCGATAGGACGAATTCTTTTCCTTCCTTCATTCTACCCTCCCACTGTGAAGGATCGTCTAGCATAACGACTCG	CGATTACCCGATAGGACGAA	TTCTTTTCCTTCCTTCATTCTACCCTCCCACTGTGAAGGA	chrX:14595449-14595489	TCGTCTAGCATAACGACTCG
chrX_C4	CGATTACCCGATAGGACGAATAAACAGCACATGACTGTTTGCCAATATGAATTTGCAGAGTCGTCTAGCATAACGACTCG	CGATTACCCGATAGGACGAA	TAAACAGCACATGACTGTTTGCCAATATGAATTTGCAGAG	chrX:14595492-14595532	TCGTCTAGCATAACGACTCG
chrX_C4	CGATTACCCGATAGGACGAAAAAACATTCCAAAGGGACAGAGGCTGGTGCTCTTTTGTTCTCGTCTAGCATAACGACTCG	CGATTACCCGATAGGACGAA	AAAACATTCCAAAGGGACAGAGGCTGGTGCTCTTTTGTTC	chrX:14595595-14595635	TCGTCTAGCATAACGACTCG
chrX_C4	CGATTACCCGATAGGACGAACCCCACCCCTGTGCTGAGTCAGGTAGGCGTGTGACAGAACTCGTCTAGCATAACGACTCG	CGATTACCCGATAGGACGAA	CCCCACCCCTGTGCTGAGTCAGGTAGGCGTGTGACAGAAC	chrX:14595645-14595685	TCGTCTAGCATAACGACTCG
chrX_C4	CGATTACCCGATAGGACGAATGCAAAACTAAGGGTGTTAAAACATAGTGTGCTTGAGAGCTCGTCTAGCATAACGACTCG	CGATTACCCGATAGGACGAA	TGCAAAACTAAGGGTGTTAAAACATAGTGTGCTTGAGAGC	chrX:14595687-14595727	TCGTCTAGCATAACGACTCG
chrX_C4	CGATTACCCGATAGGACGAACTAGAAGGGAAATTCTTCCCACGGATGCTACTATTGCTTATCGTCTAGCATAACGACTCG	CGATTACCCGATAGGACGAA	CTAGAAGGGAAATTCTTCCCACGGATGCTACTATTGCTTA	chrX:14595729-14595769	TCGTCTAGCATAACGACTCG
chrX_C4	CGATTACCCGATAGGACGAAAAAGATAGCAATAGGAACAGGAATGGAAAGCCAGAAGCTCTCGTCTAGCATAACGACTCG	CGATTACCCGATAGGACGAA	AAAGATAGCAATAGGAACAGGAATGGAAAGCCAGAAGCTC	chrX:14595783-14595823	TCGTCTAGCATAACGACTCG
chrX_C4	CGATTACCCGATAGGACGAACCATGGTGAGAGTCCCAGCTAAGAAGCCCAGCTGATTGCTTCGTCTAGCATAACGACTCG	CGATTACCCGATAGGACGAA	CCATGGTGAGAGTCCCAGCTAAGAAGCCCAGCTGATTGCT	chrX:14595825-14595865	TCGTCTAGCATAACGACTCG
chrX_C4	CGATTACCCGATAGGACGAATGAAGGTTTGTAAATCCCCAATTCAAATCTGTTACCTTTGTCGTCTAGCATAACGACTCG	CGATTACCCGATAGGACGAA	TGAAGGTTTGTAAATCCCCAATTCAAATCTGTTACCTTTG	chrX:14595885-14595925	TCGTCTAGCATAACGACTCG
chrX_C4	CGATTACCCGATAGGACGAACTCTAGGTCAGGCTTTTCCAGTTGGCTCTAGGAGATCTTGTCGTCTAGCATAACGACTCG	CGATTACCCGATAGGACGAA	CTCTAGGTCAGGCTTTTCCAGTTGGCTCTAGGAGATCTTG	chrX:14595927-14595967	TCGTCTAGCATAACGACTCG
chrX_C4	CGATTACCCGATAGGACGAAAGCTCCTGGTTTAATGATGTTTGGCTTACTCTTTGCTGCTTCGTCTAGCATAACGACTCG	CGATTACCCGATAGGACGAA	AGCTCCTGGTTTAATGATGTTTGGCTTACTCTTTGCTGCT	chrX:14595969-14596009	TCGTCTAGCATAACGACTCG
chrX_C4	CGATTACCCGATAGGACGAATCTCTCTCTGCTACTTGTGACTTGCTCCTTTACTTTCTAATCGTCTAGCATAACGACTCG	CGATTACCCGATAGGACGAA	TCTCTCTCTGCTACTTGTGACTTGCTCCTTTACTTTCTAA	chrX:14596011-14596051	TCGTCTAGCATAACGACTCG
chrX_C4	CGATTACCCGATAGGACGAAAGCTCACTCATTCAAAAGCAAAACAGTACAGAGCAGGCCCTCGTCTAGCATAACGACTCG	CGATTACCCGATAGGACGAA	AGCTCACTCATTCAAAAGCAAAACAGTACAGAGCAGGCCC	chrX:14596053-14596093	TCGTCTAGCATAACGACTCG
chrX_C4	CGATTACCCGATAGGACGAAACTTGATTTTCTCCTAATGGTGAATTTCTCAATCTTCCGCTCGTCTAGCATAACGACTCG	CGATTACCCGATAGGACGAA	ACTTGATTTTCTCCTAATGGTGAATTTCTCAATCTTCCGC	chrX:14596095-14596135	TCGTCTAGCATAACGACTCG
chrX_C4	CGATTACCCGATAGGACGAACCCTCTGTCTATTTATTATTTATCTAATAGATCCCAGACCTCGTCTAGCATAACGACTCG	CGATTACCCGATAGGACGAA	CCCTCTGTCTATTTATTATTTATCTAATAGATCCCAGACC	chrX:14596226-14596266	TCGTCTAGCATAACGACTCG
chrX_C4	CGATTACCCGATAGGACGAAGGGGCAGATTTCAGAATGCACAATGCTGAACTTGGTAAACTCGTCTAGCATAACGACTCG	CGATTACCCGATAGGACGAA	GGGGCAGATTTCAGAATGCACAATGCTGAACTTGGTAAAC	chrX:14596268-14596308	TCGTCTAGCATAACGACTCG
chrX_C4	CGATTACCCGATAGGACGAACTTAAACTGCAGAAGTACAAATGTGTTACTGTTCCATTGATCGTCTAGCATAACGACTCG	CGATTACCCGATAGGACGAA	CTTAAACTGCAGAAGTACAAATGTGTTACTGTTCCATTGA	chrX:14596310-14596350	TCGTCTAGCATAACGACTCG
chrX_C4	CGATTACCCGATAGGACGAACCAGTTCCAGTCCCTTTATTACTCACTAACTTCTTTCTTGTCGTCTAGCATAACGACTCG	CGATTACCCGATAGGACGAA	CCAGTTCCAGTCCCTTTATTACTCACTAACTTCTTTCTTG	chrX:14596352-14596392	TCGTCTAGCATAACGACTCG
chrX_C4	CGATTACCCGATAGGACGAACCCCACTCCACATATGCTAAACAACCAGTTAATTTGGAAGTCGTCTAGCATAACGACTCG	CGATTACCCGATAGGACGAA	CCCCACTCCACATATGCTAAACAACCAGTTAATTTGGAAG	chrX:14596394-14596434	TCGTCTAGCATAACGACTCG
chrX_C4	CGATTACCCGATAGGACGAATTTAGAGGAGAGGAAACAAGTCTTTTCACCTTCATTCCTTTCGTCTAGCATAACGACTCG	CGATTACCCGATAGGACGAA	TTTAGAGGAGAGGAAACAAGTCTTTTCACCTTCATTCCTT	chrX:14596436-14596476	TCGTCTAGCATAACGACTCG
chrX_C4	CGATTACCCGATAGGACGAATGGGGTGTTTGCCAGGGCTGGATGGAACTGTGGGACTCATTCGTCTAGCATAACGACTCG	CGATTACCCGATAGGACGAA	TGGGGTGTTTGCCAGGGCTGGATGGAACTGTGGGACTCAT	chrX:14596478-14596518	TCGTCTAGCATAACGACTCG
chrX_C4	CGATTACCCGATAGGACGAAAAATCATGAGTGGAAACGAGCTTGAGCTCATTTTCTCATATCGTCTAGCATAACGACTCG	CGATTACCCGATAGGACGAA	AAATCATGAGTGGAAACGAGCTTGAGCTCATTTTCTCATA	chrX:14596520-14596560	TCGTCTAGCATAACGACTCG
chrX_C4	CGATTACCCGATAGGACGAATTGACTTAGCAAAAGCTGCCTCTCCTTTGCTATGGCAAATTCGTCTAGCATAACGACTCG	CGATTACCCGATAGGACGAA	TTGACTTAGCAAAAGCTGCCTCTCCTTTGCTATGGCAAAT	chrX:14596562-14596602	TCGTCTAGCATAACGACTCG
chrX_C4	CGATTACCCGATAGGACGAAGAATGTTAAATCAGAGTCAGACAGTCTGGTTTTGAATAGTTCGTCTAGCATAACGACTCG	CGATTACCCGATAGGACGAA	GAATGTTAAATCAGAGTCAGACAGTCTGGTTTTGAATAGT	chrX:14596604-14596644	TCGTCTAGCATAACGACTCG
chrX_C4	CGATTACCCGATAGGACGAACTATGTGTTTCTGTGATGTTAACAGCCTTCCAAATATATCTCGTCTAGCATAACGACTCG	CGATTACCCGATAGGACGAA	CTATGTGTTTCTGTGATGTTAACAGCCTTCCAAATATATC	chrX:14596646-14596686	TCGTCTAGCATAACGACTCG
chrX_C4	CGATTACCCGATAGGACGAATAGTTGTTGGAGCCTCAGTTTCTGCTTCTTTCAAGTGGAGTCGTCTAGCATAACGACTCG	CGATTACCCGATAGGACGAA	TAGTTGTTGGAGCCTCAGTTTCTGCTTCTTTCAAGTGGAG	chrX:14596688-14596728	TCGTCTAGCATAACGACTCG
chrX_C4	CGATTACCCGATAGGACGAAAATAGTACTGGCCTTCCCAGCATCATTGAGGGTGACAATATCGTCTAGCATAACGACTCG	CGATTACCCGATAGGACGAA	AATAGTACTGGCCTTCCCAGCATCATTGAGGGTGACAATA	chrX:14596730-14596770	TCGTCTAGCATAACGACTCG
chrX_C4	CGATTACCCGATAGGACGAATAGGAAACCCTTTGTAAACTTTAAAACATCAAGAAGCCAGTCGTCTAGCATAACGACTCG	CGATTACCCGATAGGACGAA	TAGGAAACCCTTTGTAAACTTTAAAACATCAAGAAGCCAG	chrX:14596773-14596813	TCGTCTAGCATAACGACTCG
chrX_C4	CGATTACCCGATAGGACGAAGCCAATTTTGGTCAAACTAAAGTACAAATAACCTGAAAGCTCGTCTAGCATAACGACTCG	CGATTACCCGATAGGACGAA	GCCAATTTTGGTCAAACTAAAGTACAAATAACCTGAAAGC	chrX:14596824-14596864	TCGTCTAGCATAACGACTCG
chrX_C4	CGATTACCCGATAGGACGAAGAGTCATATCATGCTGCATTTGTAACTCCTTCTTTGCCAATCGTCTAGCATAACGACTCG	CGATTACCCGATAGGACGAA	GAGTCATATCATGCTGCATTTGTAACTCCTTCTTTGCCAA	chrX:14596866-14596906	TCGTCTAGCATAACGACTCG
chrX_C4	CGATTACCCGATAGGACGAATATTGAGTACATACAAAACTTTCCCCACTAAGATACATGCTCGTCTAGCATAACGACTCG	CGATTACCCGATAGGACGAA	TATTGAGTACATACAAAACTTTCCCCACTAAGATACATGC	chrX:14596957-14596997	TCGTCTAGCATAACGACTCG
chrX_C4	CGATTACCCGATAGGACGAATTCTAATATAGTCTAATGGAAACACCCACTGACCAGAAAATCGTCTAGCATAACGACTCG	CGATTACCCGATAGGACGAA	TTCTAATATAGTCTAATGGAAACACCCACTGACCAGAAAA	chrX:14596999-14597039	TCGTCTAGCATAACGACTCG
chrX_C4	CGATTACCCGATAGGACGAACTAAGCAAACAGCTCATTATTTGCTATGGATTTTGTTGTCTCGTCTAGCATAACGACTCG	CGATTACCCGATAGGACGAA	CTAAGCAAACAGCTCATTATTTGCTATGGATTTTGTTGTC	chrX:14597041-14597081	TCGTCTAGCATAACGACTCG
chrX_C4	CGATTACCCGATAGGACGAATATCATGATACTCACAGTTTGGGAACTGTCTTAAATACTGTCGTCTAGCATAACGACTCG	CGATTACCCGATAGGACGAA	TATCATGATACTCACAGTTTGGGAACTGTCTTAAATACTG	chrX:14597099-14597139	TCGTCTAGCATAACGACTCG
chrX_C4	CGATTACCCGATAGGACGAAGAAAATGGAGTAATTAAGGGTAATGCTTTTCAAAGTGCAGTCGTCTAGCATAACGACTCG	CGATTACCCGATAGGACGAA	GAAAATGGAGTAATTAAGGGTAATGCTTTTCAAAGTGCAG	chrX:14597250-14597290	TCGTCTAGCATAACGACTCG
chrX_C4	CGATTACCCGATAGGACGAAGGGGATTACTCTTCTTTCTTGATAAAGATGGAATCACAAATCGTCTAGCATAACGACTCG	CGATTACCCGATAGGACGAA	GGGGATTACTCTTCTTTCTTGATAAAGATGGAATCACAAA	chrX:14597305-14597345	TCGTCTAGCATAACGACTCG
chrX_C4	CGATTACCCGATAGGACGAAGTTCTAATTGACTTGGAGAAACAGTGGAAGTCCACATCTCTCGTCTAGCATAACGACTCG	CGATTACCCGATAGGACGAA	GTTCTAATTGACTTGGAGAAACAGTGGAAGTCCACATCTC	chrX:14597347-14597387	TCGTCTAGCATAACGACTCG
chrX_C4	CGATTACCCGATAGGACGAAAATCAGGAGATGGATTGGCTACCTTAAATGATGAACTGAGTCGTCTAGCATAACGACTCG	CGATTACCCGATAGGACGAA	AATCAGGAGATGGATTGGCTACCTTAAATGATGAACTGAG	chrX:14597389-14597429	TCGTCTAGCATAACGACTCG
chrX_C4	CGATTACCCGATAGGACGAAGTGTTTGCATTTTGGAATTCCCATCTTTGTAATAGACAGCTCGTCTAGCATAACGACTCG	CGATTACCCGATAGGACGAA	GTGTTTGCATTTTGGAATTCCCATCTTTGTAATAGACAGC	chrX:14597435-14597475	TCGTCTAGCATAACGACTCG
chrX_C4	CGATTACCCGATAGGACGAACTGAAAAGAATGCCTTGTGGGAGTCTGATTAAAACTTCTGTCGTCTAGCATAACGACTCG	CGATTACCCGATAGGACGAA	CTGAAAAGAATGCCTTGTGGGAGTCTGATTAAAACTTCTG	chrX:14597477-14597517	TCGTCTAGCATAACGACTCG
chrX_C4	CGATTACCCGATAGGACGAACATTTGTTACTCTACAGAGGAGTTGGTTCAGTTCCCAACATCGTCTAGCATAACGACTCG	CGATTACCCGATAGGACGAA	CATTTGTTACTCTACAGAGGAGTTGGTTCAGTTCCCAACA	chrX:14597549-14597589	TCGTCTAGCATAACGACTCG
chrX_C4	CGATTACCCGATAGGACGAAATGTAGTGTGACTAACAACCAGTGTGACTCCAATTCTAGATCGTCTAGCATAACGACTCG	CGATTACCCGATAGGACGAA	ATGTAGTGTGACTAACAACCAGTGTGACTCCAATTCTAGA	chrX:14597592-14597632	TCGTCTAGCATAACGACTCG
chrX_C4	CGATTACCCGATAGGACGAAATGCAATACTGCTGACCTCTATGGTCTCCTGTATGCTTGTTCGTCTAGCATAACGACTCG	CGATTACCCGATAGGACGAA	ATGCAATACTGCTGACCTCTATGGTCTCCTGTATGCTTGT	chrX:14597634-14597674	TCGTCTAGCATAACGACTCG
chrX_C4	CGATTACCCGATAGGACGAAGCTTGTGGTACACATGAATACTCAGGCTATATACTCAGACTCGTCTAGCATAACGACTCG	CGATTACCCGATAGGACGAA	GCTTGTGGTACACATGAATACTCAGGCTATATACTCAGAC	chrX:14597676-14597716	TCGTCTAGCATAACGACTCG
chrX_C4	CGATTACCCGATAGGACGAACTATCTATTTATCTATCGAGAGATCTCAGATTCCAAGCTTTCGTCTAGCATAACGACTCG	CGATTACCCGATAGGACGAA	CTATCTATTTATCTATCGAGAGATCTCAGATTCCAAGCTT	chrX:14597819-14597859	TCGTCTAGCATAACGACTCG
chrX_C4	CGATTACCCGATAGGACGAAATTAACACTGTGATAGTGTACACTTTTCATCAGTGGATACTCGTCTAGCATAACGACTCG	CGATTACCCGATAGGACGAA	ATTAACACTGTGATAGTGTACACTTTTCATCAGTGGATAC	chrX:14597981-14598021	TCGTCTAGCATAACGACTCG
chrX_C4	CGATTACCCGATAGGACGAATTTTGGCTACACTATAATTCTAAAGGCTGTTTAGCCTGAATCGTCTAGCATAACGACTCG	CGATTACCCGATAGGACGAA	TTTTGGCTACACTATAATTCTAAAGGCTGTTTAGCCTGAA	chrX:14598054-14598094	TCGTCTAGCATAACGACTCG
chrX_C4	CGATTACCCGATAGGACGAATTTTGTTTGTTTCTCGGCTTGCCAGTAGACAAATCCCAGATCGTCTAGCATAACGACTCG	CGATTACCCGATAGGACGAA	TTTTGTTTGTTTCTCGGCTTGCCAGTAGACAAATCCCAGA	chrX:14598130-14598170	TCGTCTAGCATAACGACTCG
chrX_C4	CGATTACCCGATAGGACGAATTCTGATTTGTCTGAACACTAAAGCCAGTATGAACAGTATTCGTCTAGCATAACGACTCG	CGATTACCCGATAGGACGAA	TTCTGATTTGTCTGAACACTAAAGCCAGTATGAACAGTAT	chrX:14598172-14598212	TCGTCTAGCATAACGACTCG
chrX_C4	CGATTACCCGATAGGACGAAATGTGCAAGTTGATACCCATGCTCAATCAACATTTTCTACTCGTCTAGCATAACGACTCG	CGATTACCCGATAGGACGAA	ATGTGCAAGTTGATACCCATGCTCAATCAACATTTTCTAC	chrX:14598214-14598254	TCGTCTAGCATAACGACTCG
chrX_C4	CGATTACCCGATAGGACGAAAAAACAGTTAGAAGCTGTAAACCAGGCCTGTAGAGGTGGTTCGTCTAGCATAACGACTCG	CGATTACCCGATAGGACGAA	AAAACAGTTAGAAGCTGTAAACCAGGCCTGTAGAGGTGGT	chrX:14598258-14598298	TCGTCTAGCATAACGACTCG
chrX_C4	CGATTACCCGATAGGACGAAAGTGCTTATGTATGCTTTGCTGTTCTTTCAGAAGACTAGATCGTCTAGCATAACGACTCG	CGATTACCCGATAGGACGAA	AGTGCTTATGTATGCTTTGCTGTTCTTTCAGAAGACTAGA	chrX:14598300-14598340	TCGTCTAGCATAACGACTCG
chrX_C4	CGATTACCCGATAGGACGAAGCACCCACATCAGGGAGCTCAAAACTTCAAAACTTCCTGTTCGTCTAGCATAACGACTCG	CGATTACCCGATAGGACGAA	GCACCCACATCAGGGAGCTCAAAACTTCAAAACTTCCTGT	chrX:14598352-14598392	TCGTCTAGCATAACGACTCG
chrX_C4	CGATTACCCGATAGGACGAAGGGGATCTGACATCCTCATTTTGCCTACACCACACATGTGTCGTCTAGCATAACGACTCG	CGATTACCCGATAGGACGAA	GGGGATCTGACATCCTCATTTTGCCTACACCACACATGTG	chrX:14598405-14598445	TCGTCTAGCATAACGACTCG
chrX_C4	CGATTACCCGATAGGACGAATAATGAACAATGTCAGTGAGGTAAAATGAATAGGTAGGAGTCGTCTAGCATAACGACTCG	CGATTACCCGATAGGACGAA	TAATGAACAATGTCAGTGAGGTAAAATGAATAGGTAGGAG	chrX:14598574-14598614	TCGTCTAGCATAACGACTCG
chrX_C4	CGATTACCCGATAGGACGAATAAGGAAAATTAGTGCAGTGTCCGATGCCTGTATCCACTGTCGTCTAGCATAACGACTCG	CGATTACCCGATAGGACGAA	TAAGGAAAATTAGTGCAGTGTCCGATGCCTGTATCCACTG	chrX:14598616-14598656	TCGTCTAGCATAACGACTCG
chrX_C4	CGATTACCCGATAGGACGAAGGTTATAAGTTCAACACCATTCTAGAGTACATAGTAAGACTCGTCTAGCATAACGACTCG	CGATTACCCGATAGGACGAA	GGTTATAAGTTCAACACCATTCTAGAGTACATAGTAAGAC	chrX:14598677-14598717	TCGTCTAGCATAACGACTCG
chrX_C4	CGATTACCCGATAGGACGAAATGAGGGAAGTAAGCATCAAAGAAGATTTTATAAACCCTGTCGTCTAGCATAACGACTCG	CGATTACCCGATAGGACGAA	ATGAGGGAAGTAAGCATCAAAGAAGATTTTATAAACCCTG	chrX:14598755-14598795	TCGTCTAGCATAACGACTCG
chrX_C4	CGATTACCCGATAGGACGAAAAAGACTGTTATTCTTCCTATTAGGTGTTCAGTAAGTACCTCGTCTAGCATAACGACTCG	CGATTACCCGATAGGACGAA	AAAGACTGTTATTCTTCCTATTAGGTGTTCAGTAAGTACC	chrX:14598847-14598887	TCGTCTAGCATAACGACTCG
chrX_C4	CGATTACCCGATAGGACGAACATAAACTCAGGAAACAACTGTGGAGGAACAATTCAAAATTCGTCTAGCATAACGACTCG	CGATTACCCGATAGGACGAA	CATAAACTCAGGAAACAACTGTGGAGGAACAATTCAAAAT	chrX:14598889-14598929	TCGTCTAGCATAACGACTCG
chrX_C4	CGATTACCCGATAGGACGAACTATGCTATCACAAAATGAGGTGTATCCTCTGTTAACTATTCGTCTAGCATAACGACTCG	CGATTACCCGATAGGACGAA	CTATGCTATCACAAAATGAGGTGTATCCTCTGTTAACTAT	chrX:14598931-14598971	TCGTCTAGCATAACGACTCG
chrX_C4	CGATTACCCGATAGGACGAAGGGGAAGGAATGATTAGCAGCTGGTAAGCCACAAGGAATTTCGTCTAGCATAACGACTCG	CGATTACCCGATAGGACGAA	GGGGAAGGAATGATTAGCAGCTGGTAAGCCACAAGGAATT	chrX:14598993-14599033	TCGTCTAGCATAACGACTCG
chrX_C4	CGATTACCCGATAGGACGAAGACTGAGCGAGATAGACAGGCTAACAAATGACTATGAGGGTCGTCTAGCATAACGACTCG	CGATTACCCGATAGGACGAA	GACTGAGCGAGATAGACAGGCTAACAAATGACTATGAGGG	chrX:14599035-14599075	TCGTCTAGCATAACGACTCG
chrX_C4	CGATTACCCGATAGGACGAATGAGTACTTAGAGCTAGTTCTATGACTCCAGGGATTCTGATCGTCTAGCATAACGACTCG	CGATTACCCGATAGGACGAA	TGAGTACTTAGAGCTAGTTCTATGACTCCAGGGATTCTGA	chrX:14599081-14599121	TCGTCTAGCATAACGACTCG
chrX_C4	CGATTACCCGATAGGACGAACTTGCAGCATGACCACTGATATGTTTAATCATCCCTAAATTCGTCTAGCATAACGACTCG	CGATTACCCGATAGGACGAA	CTTGCAGCATGACCACTGATATGTTTAATCATCCCTAAAT	chrX:14599123-14599163	TCGTCTAGCATAACGACTCG
chrX_C4	CGATTACCCGATAGGACGAAAATCACTGATTCCCAAACATCTCTAGTCCTTATGCTGATGTCGTCTAGCATAACGACTCG	CGATTACCCGATAGGACGAA	AATCACTGATTCCCAAACATCTCTAGTCCTTATGCTGATG	chrX:14599165-14599205	TCGTCTAGCATAACGACTCG
chrX_C4	CGATTACCCGATAGGACGAACATTTGCTCTGAAGAGGATTATGGAATGAGAGTCTTAGAGTCGTCTAGCATAACGACTCG	CGATTACCCGATAGGACGAA	CATTTGCTCTGAAGAGGATTATGGAATGAGAGTCTTAGAG	chrX:14599207-14599247	TCGTCTAGCATAACGACTCG
chrX_C4	CGATTACCCGATAGGACGAATTTTCTTCTTGTGAGCTTCTTGGGCTGTTGAAGATACAAATCGTCTAGCATAACGACTCG	CGATTACCCGATAGGACGAA	TTTTCTTCTTGTGAGCTTCTTGGGCTGTTGAAGATACAAA	chrX:14599303-14599343	TCGTCTAGCATAACGACTCG
chrX_C4	CGATTACCCGATAGGACGAAATATGTACCCATTGCAATTTTCCCCTTGTAGCAGTTGTGTTCGTCTAGCATAACGACTCG	CGATTACCCGATAGGACGAA	ATATGTACCCATTGCAATTTTCCCCTTGTAGCAGTTGTGT	chrX:14599345-14599385	TCGTCTAGCATAACGACTCG
chrX_C4	CGATTACCCGATAGGACGAAGAGTCTTTTGGTTGTTTGGCTATCTTATAGTCAGATGTAACGATTAGTAGGAAGCTGCCG	CGATTACCCGATAGGACGAA	GAGTCTTTTGGTTGTTTGGCTATCTTATAGTCAGATGTAA	chrX:15252130-15252170	CGATTAGTAGGAAGCTGCCG
chrX_C4	CGATTACCCGATAGGACGAATTAATTTACAGCTCTCCTTTTCAGATATGGTTTCACTGTGCGATTAGTAGGAAGCTGCCG	CGATTACCCGATAGGACGAA	TTAATTTACAGCTCTCCTTTTCAGATATGGTTTCACTGTG	chrX:15252237-15252277	CGATTAGTAGGAAGCTGCCG
chrX_C4	CGATTACCCGATAGGACGAACCCCTGGCTGGCCTAGAACTTGCAGAAAGAAACATTCCAACGATTAGTAGGAAGCTGCCG	CGATTACCCGATAGGACGAA	CCCCTGGCTGGCCTAGAACTTGCAGAAAGAAACATTCCAA	chrX:15252279-15252319	CGATTAGTAGGAAGCTGCCG
chrX_C4	CGATTACCCGATAGGACGAACTACCACAAAGGTAATAGAGGAACAGTGCTTCTCTTAACCCGATTAGTAGGAAGCTGCCG	CGATTACCCGATAGGACGAA	CTACCACAAAGGTAATAGAGGAACAGTGCTTCTCTTAACC	chrX:15252321-15252361	CGATTAGTAGGAAGCTGCCG
chrX_C4	CGATTACCCGATAGGACGAACTTCTGAGATGGTGATTAACACAGAGACCCATAATGGGCCCGATTAGTAGGAAGCTGCCG	CGATTACCCGATAGGACGAA	CTTCTGAGATGGTGATTAACACAGAGACCCATAATGGGCC	chrX:15252363-15252403	CGATTAGTAGGAAGCTGCCG
chrX_C4	CGATTACCCGATAGGACGAAGCAGAGAGTGAGAGACTGTAGAATGTTTGGCCTTAAGTAACGATTAGTAGGAAGCTGCCG	CGATTACCCGATAGGACGAA	GCAGAGAGTGAGAGACTGTAGAATGTTTGGCCTTAAGTAA	chrX:15252408-15252448	CGATTAGTAGGAAGCTGCCG
chrX_C4	CGATTACCCGATAGGACGAAATACTACAACTTCTGCTTCTAAGGTTCAGGAATCATTGCTCGATTAGTAGGAAGCTGCCG	CGATTACCCGATAGGACGAA	ATACTACAACTTCTGCTTCTAAGGTTCAGGAATCATTGCT	chrX:15252450-15252490	CGATTAGTAGGAAGCTGCCG
chrX_C4	CGATTACCCGATAGGACGAAAAAGAAACAGAAAGGGTACAAGAGCCAGAAGTAGTAGATGCGATTAGTAGGAAGCTGCCG	CGATTACCCGATAGGACGAA	AAAGAAACAGAAAGGGTACAAGAGCCAGAAGTAGTAGATG	chrX:15252492-15252532	CGATTAGTAGGAAGCTGCCG
chrX_C4	CGATTACCCGATAGGACGAATATTATATAGCAGAGCAGCTCTACATATGAACTTACAGTGCGATTAGTAGGAAGCTGCCG	CGATTACCCGATAGGACGAA	TATTATATAGCAGAGCAGCTCTACATATGAACTTACAGTG	chrX:15252589-15252629	CGATTAGTAGGAAGCTGCCG
chrX_C4	CGATTACCCGATAGGACGAAAAGTCACTCTTTCAAAACAGAAACATCACCTTGTAGATTGCGATTAGTAGGAAGCTGCCG	CGATTACCCGATAGGACGAA	AAGTCACTCTTTCAAAACAGAAACATCACCTTGTAGATTG	chrX:15252689-15252729	CGATTAGTAGGAAGCTGCCG
chrX_C4	CGATTACCCGATAGGACGAATGCTGACAACAGCAGTTATGTTTTGTTAGGTCTTGAGGATCGATTAGTAGGAAGCTGCCG	CGATTACCCGATAGGACGAA	TGCTGACAACAGCAGTTATGTTTTGTTAGGTCTTGAGGAT	chrX:15252731-15252771	CGATTAGTAGGAAGCTGCCG
chrX_C4	CGATTACCCGATAGGACGAATAATAAAGTTTTCAGTGAGTTTCCTCAATATGCAGCAAGCCGATTAGTAGGAAGCTGCCG	CGATTACCCGATAGGACGAA	TAATAAAGTTTTCAGTGAGTTTCCTCAATATGCAGCAAGC	chrX:15252804-15252844	CGATTAGTAGGAAGCTGCCG
chrX_C4	CGATTACCCGATAGGACGAAAAGCAAAATAATATCAACAAGTGGACAGAGACATTGTGCACGATTAGTAGGAAGCTGCCG	CGATTACCCGATAGGACGAA	AAGCAAAATAATATCAACAAGTGGACAGAGACATTGTGCA	chrX:15252846-15252886	CGATTAGTAGGAAGCTGCCG
chrX_C4	CGATTACCCGATAGGACGAAGATAGCAGGACACTGTCAAATTGGGCACTCACAAAATCCACGATTAGTAGGAAGCTGCCG	CGATTACCCGATAGGACGAA	GATAGCAGGACACTGTCAAATTGGGCACTCACAAAATCCA	chrX:15252888-15252928	CGATTAGTAGGAAGCTGCCG
chrX_C4	CGATTACCCGATAGGACGAAAGAGACAACTGGAATAATAAAACTGAGTGAGCAAGCAAAGCGATTAGTAGGAAGCTGCCG	CGATTACCCGATAGGACGAA	AGAGACAACTGGAATAATAAAACTGAGTGAGCAAGCAAAG	chrX:15252930-15252970	CGATTAGTAGGAAGCTGCCG
chrX_C4	CGATTACCCGATAGGACGAAATGATCAAAGTAGAGCTTAAACATCCAGCAGAAATTGAACCGATTAGTAGGAAGCTGCCG	CGATTACCCGATAGGACGAA	ATGATCAAAGTAGAGCTTAAACATCCAGCAGAAATTGAAC	chrX:15252975-15253015	CGATTAGTAGGAAGCTGCCG
chrX_C4	CGATTACCCGATAGGACGAAGGAAGCCTTATGGAAGCATCCAGATGGAGCGCTCAATCCACGATTAGTAGGAAGCTGCCG	CGATTACCCGATAGGACGAA	GGAAGCCTTATGGAAGCATCCAGATGGAGCGCTCAATCCA	chrX:15253017-15253057	CGATTAGTAGGAAGCTGCCG
chrX_C4	CGATTACCCGATAGGACGAAGTCCCAAATGGAGTGGAAGGTCCCACTGGGTGAAGCTTACCGATTAGTAGGAAGCTGCCG	CGATTACCCGATAGGACGAA	GTCCCAAATGGAGTGGAAGGTCCCACTGGGTGAAGCTTAC	chrX:15253059-15253099	CGATTAGTAGGAAGCTGCCG
chrX_C4	CGATTACCCGATAGGACGAAAAATACCAGCAGATATACAACATCCAGCAGAAATAACTAGCGATTAGTAGGAAGCTGCCG	CGATTACCCGATAGGACGAA	AAATACCAGCAGATATACAACATCCAGCAGAAATAACTAG	chrX:15253111-15253151	CGATTAGTAGGAAGCTGCCG
chrX_C4	CGATTACCCGATAGGACGAAAAGCCCAGCTGACACAGTGATAATAGAGGTTTTGTTAGAACGATTAGTAGGAAGCTGCCG	CGATTACCCGATAGGACGAA	AAGCCCAGCTGACACAGTGATAATAGAGGTTTTGTTAGAA	chrX:15253153-15253193	CGATTAGTAGGAAGCTGCCG
chrX_C4	CGATTACCCGATAGGACGAATTTTAGTACTCTTAGGTAGTTATTGTTTCGCTATCCCCATCGATTAGTAGGAAGCTGCCG	CGATTACCCGATAGGACGAA	TTTTAGTACTCTTAGGTAGTTATTGTTTCGCTATCCCCAT	chrX:15253340-15253380	CGATTAGTAGGAAGCTGCCG
chrX_C4	CGATTACCCGATAGGACGAACTGAGACAGGGAGCCAGCTTGGCCCAGAACAAGGGTTGGACGATTAGTAGGAAGCTGCCG	CGATTACCCGATAGGACGAA	CTGAGACAGGGAGCCAGCTTGGCCCAGAACAAGGGTTGGA	chrX:15253382-15253422	CGATTAGTAGGAAGCTGCCG
chrX_C4	CGATTACCCGATAGGACGAAATAACTTTCAGAGTACACATGGACTCCTAAAGTCAACACACGATTAGTAGGAAGCTGCCG	CGATTACCCGATAGGACGAA	ATAACTTTCAGAGTACACATGGACTCCTAAAGTCAACACA	chrX:15253424-15253464	CGATTAGTAGGAAGCTGCCG
chrX_C4	CGATTACCCGATAGGACGAATTCATTATTTGCCAGCTGGCATGCCTTATGTGGAACTTACCGATTAGTAGGAAGCTGCCG	CGATTACCCGATAGGACGAA	TTCATTATTTGCCAGCTGGCATGCCTTATGTGGAACTTAC	chrX:15253466-15253506	CGATTAGTAGGAAGCTGCCG
chrX_C4	CGATTACCCGATAGGACGAAAAGTTGTGTAGGCACAACCTTACTGTTCTTGGCATTTTGCCGATTAGTAGGAAGCTGCCG	CGATTACCCGATAGGACGAA	AAGTTGTGTAGGCACAACCTTACTGTTCTTGGCATTTTGC	chrX:15253508-15253548	CGATTAGTAGGAAGCTGCCG
chrX_C4	CGATTACCCGATAGGACGAAACTAAAACCCTATCCTGGTTGAGACACTTCAATTAGTGAACGATTAGTAGGAAGCTGCCG	CGATTACCCGATAGGACGAA	ACTAAAACCCTATCCTGGTTGAGACACTTCAATTAGTGAA	chrX:15253550-15253590	CGATTAGTAGGAAGCTGCCG
chrX_C4	CGATTACCCGATAGGACGAAGGGGCCTATGCACTGGACTCTTAGGTCAGAATAGTGTGTTCGATTAGTAGGAAGCTGCCG	CGATTACCCGATAGGACGAA	GGGGCCTATGCACTGGACTCTTAGGTCAGAATAGTGTGTT	chrX:15253712-15253752	CGATTAGTAGGAAGCTGCCG
chrX_C4	CGATTACCCGATAGGACGAATGCCTGTAACATGGTGTCAGTTGTGCTAAGATCTGTGTCCCGATTAGTAGGAAGCTGCCG	CGATTACCCGATAGGACGAA	TGCCTGTAACATGGTGTCAGTTGTGCTAAGATCTGTGTCC	chrX:15253754-15253794	CGATTAGTAGGAAGCTGCCG
chrX_C4	CGATTACCCGATAGGACGAAGTTACACAAAGGTTTTCAGAGGAGACAAAGGAGAGCATCCCGATTAGTAGGAAGCTGCCG	CGATTACCCGATAGGACGAA	GTTACACAAAGGTTTTCAGAGGAGACAAAGGAGAGCATCC	chrX:15253796-15253836	CGATTAGTAGGAAGCTGCCG
chrX_C4	CGATTACCCGATAGGACGAATACTATAATTCCCCATACTCTTCTTCCATAATTGTGTGAGCGATTAGTAGGAAGCTGCCG	CGATTACCCGATAGGACGAA	TACTATAATTCCCCATACTCTTCTTCCATAATTGTGTGAG	chrX:15253908-15253948	CGATTAGTAGGAAGCTGCCG
chrX_C4	CGATTACCCGATAGGACGAATATTTCAATCCCTTCAATTTCAGTGATCTTACCAGGATTGCGATTAGTAGGAAGCTGCCG	CGATTACCCGATAGGACGAA	TATTTCAATCCCTTCAATTTCAGTGATCTTACCAGGATTG	chrX:15254033-15254073	CGATTAGTAGGAAGCTGCCG
chrX_C4	CGATTACCCGATAGGACGAAAAAAGTCTTTCATCACTCTCTGACCTCCAAGATTCATTAACGATTAGTAGGAAGCTGCCG	CGATTACCCGATAGGACGAA	AAAAGTCTTTCATCACTCTCTGACCTCCAAGATTCATTAA	chrX:15254125-15254165	CGATTAGTAGGAAGCTGCCG
chrX_C4	CGATTACCCGATAGGACGAATAGCAGAAACAGAATATTAACCAGGTATTGGTCATGTTTGCGATTAGTAGGAAGCTGCCG	CGATTACCCGATAGGACGAA	TAGCAGAAACAGAATATTAACCAGGTATTGGTCATGTTTG	chrX:15254241-15254281	CGATTAGTAGGAAGCTGCCG
chrX_C4	CGATTACCCGATAGGACGAACCATGTTCCTGGTGATTAAGATTTGCTTAGATATAGGGAACGATTAGTAGGAAGCTGCCG	CGATTACCCGATAGGACGAA	CCATGTTCCTGGTGATTAAGATTTGCTTAGATATAGGGAA	chrX:15254283-15254323	CGATTAGTAGGAAGCTGCCG
chrX_C4	CGATTACCCGATAGGACGAAAGCCCTTTTCTCCTGAATCTGTATGTACCACTTTCTTGTTCGATTAGTAGGAAGCTGCCG	CGATTACCCGATAGGACGAA	AGCCCTTTTCTCCTGAATCTGTATGTACCACTTTCTTGTT	chrX:15254325-15254365	CGATTAGTAGGAAGCTGCCG
chrX_C4	CGATTACCCGATAGGACGAATGGCTTTCACAGGCCTTAGTGATACATTGTTAAGCATTAGCGATTAGTAGGAAGCTGCCG	CGATTACCCGATAGGACGAA	TGGCTTTCACAGGCCTTAGTGATACATTGTTAAGCATTAG	chrX:15254367-15254407	CGATTAGTAGGAAGCTGCCG
chrX_C4	CGATTACCCGATAGGACGAACTCAATGAGTTATTAGCATTGTTATCTGTGAACTACTGCACGATTAGTAGGAAGCTGCCG	CGATTACCCGATAGGACGAA	CTCAATGAGTTATTAGCATTGTTATCTGTGAACTACTGCA	chrX:15254409-15254449	CGATTAGTAGGAAGCTGCCG
chrX_C4	CGATTACCCGATAGGACGAACCCTTTTGCCAATGAATGAAGGTCAACTAAGGAATTTGCTCGATTAGTAGGAAGCTGCCG	CGATTACCCGATAGGACGAA	CCCTTTTGCCAATGAATGAAGGTCAACTAAGGAATTTGCT	chrX:15254451-15254491	CGATTAGTAGGAAGCTGCCG
chrX_C4	CGATTACCCGATAGGACGAAACAACAGAAGTTATTCTATAAGGTCTTACTGCTTACGTTCCGATTAGTAGGAAGCTGCCG	CGATTACCCGATAGGACGAA	ACAACAGAAGTTATTCTATAAGGTCTTACTGCTTACGTTC	chrX:15254505-15254545	CGATTAGTAGGAAGCTGCCG
chrX_C4	CGATTACCCGATAGGACGAAACTCTCTTAAGCAACGGAGACATCTATACTGCCAAACAGCCGATTAGTAGGAAGCTGCCG	CGATTACCCGATAGGACGAA	ACTCTCTTAAGCAACGGAGACATCTATACTGCCAAACAGC	chrX:15254547-15254587	CGATTAGTAGGAAGCTGCCG
chrX_C4	CGATTACCCGATAGGACGAACTCTATGAAGATATTTAAGAAGCAATCAGATTTTGCCTGCCGATTAGTAGGAAGCTGCCG	CGATTACCCGATAGGACGAA	CTCTATGAAGATATTTAAGAAGCAATCAGATTTTGCCTGC	chrX:15254621-15254661	CGATTAGTAGGAAGCTGCCG
chrX_C4	CGATTACCCGATAGGACGAACTTCTGCAGCTTAGAGCCAGATGGCCACATTCCAGGCAACCGATTAGTAGGAAGCTGCCG	CGATTACCCGATAGGACGAA	CTTCTGCAGCTTAGAGCCAGATGGCCACATTCCAGGCAAC	chrX:15254663-15254703	CGATTAGTAGGAAGCTGCCG
chrX_C4	CGATTACCCGATAGGACGAATACAGTAGAACCAACCAATCCAGAGAACTTGGAAAATAAACGATTAGTAGGAAGCTGCCG	CGATTACCCGATAGGACGAA	TACAGTAGAACCAACCAATCCAGAGAACTTGGAAAATAAA	chrX:15254705-15254745	CGATTAGTAGGAAGCTGCCG
chrX_C4	CGATTACCCGATAGGACGAAAAAACCAACCAGTTCTAAGCAGAACTGCCATGGGCTGACACGATTAGTAGGAAGCTGCCG	CGATTACCCGATAGGACGAA	AAAACCAACCAGTTCTAAGCAGAACTGCCATGGGCTGACA	chrX:15254835-15254875	CGATTAGTAGGAAGCTGCCG
chrX_C4	CGATTACCCGATAGGACGAAGGGAGAGGGAGGGAGAGGGAGAGCTGGATCCAGGATTTTCCGATTAGTAGGAAGCTGCCG	CGATTACCCGATAGGACGAA	GGGAGAGGGAGGGAGAGGGAGAGCTGGATCCAGGATTTTC	chrX:15255183-15255223	CGATTAGTAGGAAGCTGCCG
chrX_C4	CGATTACCCGATAGGACGAATTTCAGTTCTAGTATATATTAGTGCATGCAGAGTCTGAAGCGATTAGTAGGAAGCTGCCG	CGATTACCCGATAGGACGAA	TTTCAGTTCTAGTATATATTAGTGCATGCAGAGTCTGAAG	chrX:15255250-15255290	CGATTAGTAGGAAGCTGCCG
chrX_C4	CGATTACCCGATAGGACGAAACAGGATACATGACCTGCTTTCTTGAGTGCTACCAGCAAACGATTAGTAGGAAGCTGCCG	CGATTACCCGATAGGACGAA	ACAGGATACATGACCTGCTTTCTTGAGTGCTACCAGCAAA	chrX:15255292-15255332	CGATTAGTAGGAAGCTGCCG
chrX_C4	CGATTACCCGATAGGACGAAAAAAGGTTCTGCAACTCTAAGTAACTCTGTCCATGTTTTACGATTAGTAGGAAGCTGCCG	CGATTACCCGATAGGACGAA	AAAAGGTTCTGCAACTCTAAGTAACTCTGTCCATGTTTTA	chrX:15255358-15255398	CGATTAGTAGGAAGCTGCCG
chrX_C4	CGATTACCCGATAGGACGAAATTTCATTTTGTAATGTCAGTGCCCCAGCCATGCACCAGTCGATTAGTAGGAAGCTGCCG	CGATTACCCGATAGGACGAA	ATTTCATTTTGTAATGTCAGTGCCCCAGCCATGCACCAGT	chrX:15255400-15255440	CGATTAGTAGGAAGCTGCCG
chrX_C4	CGATTACCCGATAGGACGAACTCTCCAGCTATATCAAGGCTACAATGCAAAGTCTTCTTCCGATTAGTAGGAAGCTGCCG	CGATTACCCGATAGGACGAA	CTCTCCAGCTATATCAAGGCTACAATGCAAAGTCTTCTTC	chrX:15255442-15255482	CGATTAGTAGGAAGCTGCCG
chrX_C4	CGATTACCCGATAGGACGAACCCTCTATCACTTTATTATCTATTTGTGTTGATTTCCCTGCGATTAGTAGGAAGCTGCCG	CGATTACCCGATAGGACGAA	CCCTCTATCACTTTATTATCTATTTGTGTTGATTTCCCTG	chrX:15255489-15255529	CGATTAGTAGGAAGCTGCCG
chrX_C4	CGATTACCCGATAGGACGAATAATTTATCACTGACAAGACCTGAGGTAAAGCACCTTGGTCGATTAGTAGGAAGCTGCCG	CGATTACCCGATAGGACGAA	TAATTTATCACTGACAAGACCTGAGGTAAAGCACCTTGGT	chrX:15255531-15255571	CGATTAGTAGGAAGCTGCCG
chrX_C4	CGATTACCCGATAGGACGAATCTGAGGGTAGAATACAATGTCTTATACATAATAGGCAAGCGATTAGTAGGAAGCTGCCG	CGATTACCCGATAGGACGAA	TCTGAGGGTAGAATACAATGTCTTATACATAATAGGCAAG	chrX:15255632-15255672	CGATTAGTAGGAAGCTGCCG
chrX_C4	CGATTACCCGATAGGACGAAGTCTACTACTGAACCATATGGTCAGCCTAAGTATCATTTTCGATTAGTAGGAAGCTGCCG	CGATTACCCGATAGGACGAA	GTCTACTACTGAACCATATGGTCAGCCTAAGTATCATTTT	chrX:15255674-15255714	CGATTAGTAGGAAGCTGCCG
chrX_C4	CGATTACCCGATAGGACGAAATCCTAGAGTTTCTATAGTCACATTACTTGGTTTTCACTCCGATTAGTAGGAAGCTGCCG	CGATTACCCGATAGGACGAA	ATCCTAGAGTTTCTATAGTCACATTACTTGGTTTTCACTC	chrX:15255778-15255818	CGATTAGTAGGAAGCTGCCG
chrX_C4	CGATTACCCGATAGGACGAAGGGTCTGCAAATTACAGTGTAACCTTATGGAAGTTGCTTACGATTAGTAGGAAGCTGCCG	CGATTACCCGATAGGACGAA	GGGTCTGCAAATTACAGTGTAACCTTATGGAAGTTGCTTA	chrX:15255820-15255860	CGATTAGTAGGAAGCTGCCG
chrX_C4	CGATTACCCGATAGGACGAATACCTCCTTTGGTACTATTATAAAAGAAGATGTGAACTGGCGATTAGTAGGAAGCTGCCG	CGATTACCCGATAGGACGAA	TACCTCCTTTGGTACTATTATAAAAGAAGATGTGAACTGG	chrX:15255912-15255952	CGATTAGTAGGAAGCTGCCG
chrX_C4	CGATTACCCGATAGGACGAATTTCAAAATAATCGCTTTGGCCTATTACCATGTATCAAGGCGATTAGTAGGAAGCTGCCG	CGATTACCCGATAGGACGAA	TTTCAAAATAATCGCTTTGGCCTATTACCATGTATCAAGG	chrX:15256022-15256062	CGATTAGTAGGAAGCTGCCG
chrX_C4	CGATTACCCGATAGGACGAAAAGAATCTTTTCAGGTGTAAAATTCAACCTATCTGTGAGCCGATTAGTAGGAAGCTGCCG	CGATTACCCGATAGGACGAA	AAGAATCTTTTCAGGTGTAAAATTCAACCTATCTGTGAGC	chrX:15256095-15256135	CGATTAGTAGGAAGCTGCCG
chrX_C4	CGATTACCCGATAGGACGAAAAAGGGTTAATTTTCACTAGTGAGAGAAAACATCTCTCTCCGATTAGTAGGAAGCTGCCG	CGATTACCCGATAGGACGAA	AAAGGGTTAATTTTCACTAGTGAGAGAAAACATCTCTCTC	chrX:15256143-15256183	CGATTAGTAGGAAGCTGCCG
chrX_C4	CGATTACCCGATAGGACGAACTTGCAGAGTGGGCCAGAAATCATGAACAAAAGGCAGGGGCGATTAGTAGGAAGCTGCCG	CGATTACCCGATAGGACGAA	CTTGCAGAGTGGGCCAGAAATCATGAACAAAAGGCAGGGG	chrX:15256185-15256225	CGATTAGTAGGAAGCTGCCG
chrX_C4	CGATTACCCGATAGGACGAATAGGGTTACTTATTTTGTGTATATGAGCATTTGCCTGCAACGATTAGTAGGAAGCTGCCG	CGATTACCCGATAGGACGAA	TAGGGTTACTTATTTTGTGTATATGAGCATTTGCCTGCAA	chrX:15256259-15256299	CGATTAGTAGGAAGCTGCCG
chrX_C4	CGATTACCCGATAGGACGAAATGTATGTATACCACTTTGTACCTAGTTCAATTCCTTGGACGATTAGTAGGAAGCTGCCG	CGATTACCCGATAGGACGAA	ATGTATGTATACCACTTTGTACCTAGTTCAATTCCTTGGA	chrX:15256301-15256341	CGATTAGTAGGAAGCTGCCG
chrX_C4	CGATTACCCGATAGGACGAAAAAGATAATTGTAAGGTAGGGTGTAGATGCTGGGAACTGTCGATTAGTAGGAAGCTGCCG	CGATTACCCGATAGGACGAA	AAAGATAATTGTAAGGTAGGGTGTAGATGCTGGGAACTGT	chrX:15256345-15256385	CGATTAGTAGGAAGCTGCCG
chrX_C4	CGATTACCCGATAGGACGAAGGCTTTGTTTTGTTTGGAAATTGATTTCAGTTGTAAAGGGCGATTAGTAGGAAGCTGCCG	CGATTACCCGATAGGACGAA	GGCTTTGTTTTGTTTGGAAATTGATTTCAGTTGTAAAGGG	chrX:15256475-15256515	CGATTAGTAGGAAGCTGCCG
chrX_C4	CGATTACCCGATAGGACGAAAAGGAATAATTACTATGCAGTCAAGAAGAAACCATGTAGGCGATTAGTAGGAAGCTGCCG	CGATTACCCGATAGGACGAA	AAGGAATAATTACTATGCAGTCAAGAAGAAACCATGTAGG	chrX:15256555-15256595	CGATTAGTAGGAAGCTGCCG
chrX_C4	CGATTACCCGATAGGACGAAGTACACACATGAGAAGATCTTTAAAAGCTTACATTTACCCCGATTAGTAGGAAGCTGCCG	CGATTACCCGATAGGACGAA	GTACACACATGAGAAGATCTTTAAAAGCTTACATTTACCC	chrX:15256857-15256897	CGATTAGTAGGAAGCTGCCG
chrX_C4	CGATTACCCGATAGGACGAATATGGCTATTATTAGTCATGTTGAATGTGTGCTTGTTTGGCGATTAGTAGGAAGCTGCCG	CGATTACCCGATAGGACGAA	TATGGCTATTATTAGTCATGTTGAATGTGTGCTTGTTTGG	chrX:15256902-15256942	CGATTAGTAGGAAGCTGCCG
chrX_C4	CGATTACCCGATAGGACGAATCATGACTACAGAACAGAAATAATCTAAACTACTCTCTCCCGATTAGTAGGAAGCTGCCG	CGATTACCCGATAGGACGAA	TCATGACTACAGAACAGAAATAATCTAAACTACTCTCTCC	chrX:15256963-15257003	CGATTAGTAGGAAGCTGCCG
chrX_C4	CGATTACCCGATAGGACGAACCTCCAAGCCTTTATTTTGATAAAGAAAGCAAATGACTACCGATTAGTAGGAAGCTGCCG	CGATTACCCGATAGGACGAA	CCTCCAAGCCTTTATTTTGATAAAGAAAGCAAATGACTAC	chrX:15257024-15257064	CGATTAGTAGGAAGCTGCCG
chrX_C4	CGATTACCCGATAGGACGAATACCTAAAGATGGATGAAGCCATAAGAATGTTACTTAGAGCGATTAGTAGGAAGCTGCCG	CGATTACCCGATAGGACGAA	TACCTAAAGATGGATGAAGCCATAAGAATGTTACTTAGAG	chrX:15257109-15257149	CGATTAGTAGGAAGCTGCCG
chrX_C4	CGATTACCCGATAGGACGAAAAAAGCGTTCCAACAACTTCTGGAATATTGACAAGTAGAACGATTAGTAGGAAGCTGCCG	CGATTACCCGATAGGACGAA	AAAAGCGTTCCAACAACTTCTGGAATATTGACAAGTAGAA	chrX:15257165-15257205	CGATTAGTAGGAAGCTGCCG
chrX_C4	CGATTACCCGATAGGACGAAGTGATGATTGGGAATAAAAGATAAATTTTCCTCAGTCCTCCGATTAGTAGGAAGCTGCCG	CGATTACCCGATAGGACGAA	GTGATGATTGGGAATAAAAGATAAATTTTCCTCAGTCCTC	chrX:15257242-15257282	CGATTAGTAGGAAGCTGCCG
chrX_C4	CGATTACCCGATAGGACGAATCCAAGAGTAAATTAAAACATCCAGTTGAACTAAGCACTCCGATTAGTAGGAAGCTGCCG	CGATTACCCGATAGGACGAA	TCCAAGAGTAAATTAAAACATCCAGTTGAACTAAGCACTC	chrX:15257369-15257409	CGATTAGTAGGAAGCTGCCG
chrX_C4	CGATTACCCGATAGGACGAAAATACAGCCTTATCACCATGAAATTGGGAATTTCTACCATCGATTAGTAGGAAGCTGCCG	CGATTACCCGATAGGACGAA	AATACAGCCTTATCACCATGAAATTGGGAATTTCTACCAT	chrX:15257411-15257451	CGATTAGTAGGAAGCTGCCG
chrX_C4	CGATTACCCGATAGGACGAAATTAGTTGGAATTCTTAGAAACATAACACCACACACACACCGATTAGTAGGAAGCTGCCG	CGATTACCCGATAGGACGAA	ATTAGTTGGAATTCTTAGAAACATAACACCACACACACAC	chrX:15257525-15257565	CGATTAGTAGGAAGCTGCCG
chrX_C4	CGATTACCCGATAGGACGAAGGGGACAAGAATGATATTTACTATGAGGTTTCCATGGTTACGATTAGTAGGAAGCTGCCG	CGATTACCCGATAGGACGAA	GGGGACAAGAATGATATTTACTATGAGGTTTCCATGGTTA	chrX:15257624-15257664	CGATTAGTAGGAAGCTGCCG
chrX_C4	CGATTACCCGATAGGACGAAGATTATGAGGTTGACAAGTCACAAGATCTTCAGGGTGACACGATTAGTAGGAAGCTGCCG	CGATTACCCGATAGGACGAA	GATTATGAGGTTGACAAGTCACAAGATCTTCAGGGTGACA	chrX:15257666-15257706	CGATTAGTAGGAAGCTGCCG
chrX_C4	CGATTACCCGATAGGACGAATCATGCTGGGGACTTGAAAGAGTTGGTGTTTTAGCACCAGCGATTAGTAGGAAGCTGCCG	CGATTACCCGATAGGACGAA	TCATGCTGGGGACTTGAAAGAGTTGGTGTTTTAGCACCAG	chrX:15257708-15257748	CGATTAGTAGGAAGCTGCCG
chrX_C4	CGATTACCCGATAGGACGAATGGGTCTTAAAATCTTAGACCAACAGCCAGAAAGAAGGTACGATTAGTAGGAAGCTGCCG	CGATTACCCGATAGGACGAA	TGGGTCTTAAAATCTTAGACCAACAGCCAGAAAGAAGGTA	chrX:15257750-15257790	CGATTAGTAGGAAGCTGCCG
chrX_C4	CGATTACCCGATAGGACGAAGTCAAAGTCTGAAAGGAAATGATGCTTCATTCTGAGCCTGCGATTAGTAGGAAGCTGCCG	CGATTACCCGATAGGACGAA	GTCAAAGTCTGAAAGGAAATGATGCTTCATTCTGAGCCTG	chrX:15257792-15257832	CGATTAGTAGGAAGCTGCCG
chrX_C4	CGATTACCCGATAGGACGAAGCATATTTTGTTTTATTCAGATCTTTAACTGAGAGGAGCCCGATTAGTAGGAAGCTGCCG	CGATTACCCGATAGGACGAA	GCATATTTTGTTTTATTCAGATCTTTAACTGAGAGGAGCC	chrX:15257872-15257912	CGATTAGTAGGAAGCTGCCG
chrX_C4	CGATTACCCGATAGGACGAATCCACACATCCAAACTGCTTCACTTCTTCTACTCATTCGACGATTAGTAGGAAGCTGCCG	CGATTACCCGATAGGACGAA	TCCACACATCCAAACTGCTTCACTTCTTCTACTCATTCGA	chrX:15257914-15257954	CGATTAGTAGGAAGCTGCCG
chrX_C4	CGATTACCCGATAGGACGAAAATCACATTCATGATAAGGTTTGAACACATATGTAGGCTCCGATTAGTAGGAAGCTGCCG	CGATTACCCGATAGGACGAA	AATCACATTCATGATAAGGTTTGAACACATATGTAGGCTC	chrX:15257981-15258021	CGATTAGTAGGAAGCTGCCG
chrX_C4	CGATTACCCGATAGGACGAAATTCCTGTGAAGTTATACGTAAATGCGGCTAATTATAGTCCGATTAGTAGGAAGCTGCCG	CGATTACCCGATAGGACGAA	ATTCCTGTGAAGTTATACGTAAATGCGGCTAATTATAGTC	chrX:15258026-15258066	CGATTAGTAGGAAGCTGCCG
chrX_C4	CGATTACCCGATAGGACGAAATTACCCATGAATGGAAAAGATAAATAGGCAGACAACTAGCGATTAGTAGGAAGCTGCCG	CGATTACCCGATAGGACGAA	ATTACCCATGAATGGAAAAGATAAATAGGCAGACAACTAG	chrX:15258112-15258152	CGATTAGTAGGAAGCTGCCG
chrX_C4	CGATTACCCGATAGGACGAAAAAATTGTGGTGTTACTATGTGCAGAAAACAAAGAGGAGACGATTAGTAGGAAGCTGCCG	CGATTACCCGATAGGACGAA	AAAATTGTGGTGTTACTATGTGCAGAAAACAAAGAGGAGA	chrX:15258231-15258271	CGATTAGTAGGAAGCTGCCG
chrX_C4	CGATTACCCGATAGGACGAACCATGGTTAAAGGACAGTCCTGATCATTTTAGATCCCTCTCGATTAGTAGGAAGCTGCCG	CGATTACCCGATAGGACGAA	CCATGGTTAAAGGACAGTCCTGATCATTTTAGATCCCTCT	chrX:15258273-15258313	CGATTAGTAGGAAGCTGCCG
chrX_C4	CGATTACCCGATAGGACGAAGTATCCTAGCTAGATTGAGAGAAAACAATCCATACATTTCCGATTAGTAGGAAGCTGCCG	CGATTACCCGATAGGACGAA	GTATCCTAGCTAGATTGAGAGAAAACAATCCATACATTTC	chrX:15258398-15258438	CGATTAGTAGGAAGCTGCCG
chrX_C4	CGATTACCCGATAGGACGAAATAAACTCAAGAAATAAAGAGGAATGCAGAGGTGGAAATGCGATTAGTAGGAAGCTGCCG	CGATTACCCGATAGGACGAA	ATAAACTCAAGAAATAAAGAGGAATGCAGAGGTGGAAATG	chrX:15258444-15258484	CGATTAGTAGGAAGCTGCCG
chrX_C4	CGATTACCCGATAGGACGAAAAAATCAGAAAAGTGCTTCTTTACTTGGACAGTCTAAGCCCGATTAGTAGGAAGCTGCCG	CGATTACCCGATAGGACGAA	AAAATCAGAAAAGTGCTTCTTTACTTGGACAGTCTAAGCC	chrX:15258507-15258547	CGATTAGTAGGAAGCTGCCG
chrX_C4	CGATTACCCGATAGGACGAATACACCAGGTAAACTTTAATAACAGAGTGGAAGCTCAAAACGATTAGTAGGAAGCTGCCG	CGATTACCCGATAGGACGAA	TACACCAGGTAAACTTTAATAACAGAGTGGAAGCTCAAAA	chrX:15258549-15258589	CGATTAGTAGGAAGCTGCCG
chrX_C4	CGATTACCCGATAGGACGAATGCAGCTAGAGACACGAGTTCTGGAAGAAGAAATTCTAAACGATTAGTAGGAAGCTGCCG	CGATTACCCGATAGGACGAA	TGCAGCTAGAGACACGAGTTCTGGAAGAAGAAATTCTAAA	chrX:15258856-15258896	CGATTAGTAGGAAGCTGCCG
chrX_C4	CGATTACCCGATAGGACGAACATGTAGAGGAATGGACAACAGGTAAATTCAACGTGAATGCGATTAGTAGGAAGCTGCCG	CGATTACCCGATAGGACGAA	CATGTAGAGGAATGGACAACAGGTAAATTCAACGTGAATG	chrX:15258898-15258938	CGATTAGTAGGAAGCTGCCG
chrX_C4	CGATTACCCGATAGGACGAAAATTACTTTGGCCTTAGTATAATGGGATGTCAGGAGACTGCGATTAGTAGGAAGCTGCCG	CGATTACCCGATAGGACGAA	AATTACTTTGGCCTTAGTATAATGGGATGTCAGGAGACTG	chrX:15258940-15258980	CGATTAGTAGGAAGCTGCCG
chrX_C4	CGATTACCCGATAGGACGAACCCCTAATATTAAGAATGGCATTTTCCCCTGCATATAATACGATTAGTAGGAAGCTGCCG	CGATTACCCGATAGGACGAA	CCCCTAATATTAAGAATGGCATTTTCCCCTGCATATAATA	chrX:15259021-15259061	CGATTAGTAGGAAGCTGCCG
chrX_C4	CGATTACCCGATAGGACGAATTTTGATGAATAAGGGATATCTGAGATTCTCAGGCAGTCTCGACAACATAGTATCCTCGA	CGATTACCCGATAGGACGAA	TTTTGATGAATAAGGGATATCTGAGATTCTCAGGCAGTCT	chrX:16522660-16522700	CGACAACATAGTATCCTCGA
chrX_C4	CGATTACCCGATAGGACGAACATTGTGAGGTTTCAGCCACTCCTTAGCTGCCTTTGGCTGCGACAACATAGTATCCTCGA	CGATTACCCGATAGGACGAA	CATTGTGAGGTTTCAGCCACTCCTTAGCTGCCTTTGGCTG	chrX:16522741-16522781	CGACAACATAGTATCCTCGA
chrX_C4	CGATTACCCGATAGGACGAACAGGGCTGAGGGGTGTGGCCCACCATTGTTCTGACAGGGACGACAACATAGTATCCTCGA	CGATTACCCGATAGGACGAA	CAGGGCTGAGGGGTGTGGCCCACCATTGTTCTGACAGGGA	chrX:16522801-16522841	CGACAACATAGTATCCTCGA
chrX_C4	CGATTACCCGATAGGACGAATAAGCAGGGTGCTCAGAGCTCTTGGGCCAGTCTCTGGAGACGACAACATAGTATCCTCGA	CGATTACCCGATAGGACGAA	TAAGCAGGGTGCTCAGAGCTCTTGGGCCAGTCTCTGGAGA	chrX:16522843-16522883	CGACAACATAGTATCCTCGA
chrX_C4	CGATTACCCGATAGGACGAATCTGCTATGGCTCAGATGGCCAAGAAAGTCCACTGGTCTACGACAACATAGTATCCTCGA	CGATTACCCGATAGGACGAA	TCTGCTATGGCTCAGATGGCCAAGAAAGTCCACTGGTCTA	chrX:16522885-16522925	CGACAACATAGTATCCTCGA
chrX_C4	CGATTACCCGATAGGACGAACAGCAGCAGGAGCAGCCGCTGCTGCCAAAATTTCGAAGCTCGACAACATAGTATCCTCGA	CGATTACCCGATAGGACGAA	CAGCAGCAGGAGCAGCCGCTGCTGCCAAAATTTCGAAGCT	chrX:16522928-16522968	CGACAACATAGTATCCTCGA
chrX_C4	CGATTACCCGATAGGACGAAGAAGACCACCAAAAGATTCAAACTTATTAAGAAGCGAAACCGACAACATAGTATCCTCGA	CGATTACCCGATAGGACGAA	GAAGACCACCAAAAGATTCAAACTTATTAAGAAGCGAAAC	chrX:16522971-16523011	CGACAACATAGTATCCTCGA
chrX_C4	CGATTACCCGATAGGACGAATAGTTCTAAGCTTCCCAAGAGATCTTCACACTCTTTACTTCGACAACATAGTATCCTCGA	CGATTACCCGATAGGACGAA	TAGTTCTAAGCTTCCCAAGAGATCTTCACACTCTTTACTT	chrX:16523013-16523053	CGACAACATAGTATCCTCGA
chrX_C4	CGATTACCCGATAGGACGAAGCTGTCGTTGTTGCTGTAGTCGTTCTCGTCGTTTTCGTAGCGACAACATAGTATCCTCGA	CGATTACCCGATAGGACGAA	GCTGTCGTTGTTGCTGTAGTCGTTCTCGTCGTTTTCGTAG	chrX:16523111-16523151	CGACAACATAGTATCCTCGA
chrX_C4	CGATTACCCGATAGGACGAAGAACTACATTAAAGGTGAGAGATCCCAAGGTAAGTTCATTCGACAACATAGTATCCTCGA	CGATTACCCGATAGGACGAA	GAACTACATTAAAGGTGAGAGATCCCAAGGTAAGTTCATT	chrX:16523153-16523193	CGACAACATAGTATCCTCGA
chrX_C4	CGATTACCCGATAGGACGAACTCCTTTCTTTAGTCATTCTTTCCCCTAAGACTTTCTCAGCGACAACATAGTATCCTCGA	CGATTACCCGATAGGACGAA	CTCCTTTCTTTAGTCATTCTTTCCCCTAAGACTTTCTCAG	chrX:16523195-16523235	CGACAACATAGTATCCTCGA
chrX_C4	CGATTACCCGATAGGACGAACTACAATCAACTTCTCATCTACCTCTGCCCCTTCACATGACGACAACATAGTATCCTCGA	CGATTACCCGATAGGACGAA	CTACAATCAACTTCTCATCTACCTCTGCCCCTTCACATGA	chrX:16523237-16523277	CGACAACATAGTATCCTCGA
chrX_C4	CGATTACCCGATAGGACGAACCCCATCCACATTCTATCTTTTCCCTAAACCAGTGCCCTTCGACAACATAGTATCCTCGA	CGATTACCCGATAGGACGAA	CCCCATCCACATTCTATCTTTTCCCTAAACCAGTGCCCTT	chrX:16523279-16523319	CGACAACATAGTATCCTCGA
chrX_C4	CGATTACCCGATAGGACGAAGGGGAGCAATCACTTCAAAGAAGAATTAGGAGACAATTGACGACAACATAGTATCCTCGA	CGATTACCCGATAGGACGAA	GGGGAGCAATCACTTCAAAGAAGAATTAGGAGACAATTGA	chrX:16523348-16523388	CGACAACATAGTATCCTCGA
chrX_C4	CGATTACCCGATAGGACGAACGGAGCCAACTGGAGCTGATCGAACCGGAACCGACCATGGCGACAACATAGTATCCTCGA	CGATTACCCGATAGGACGAA	CGGAGCCAACTGGAGCTGATCGAACCGGAACCGACCATGG	chrX:16523390-16523430	CGACAACATAGTATCCTCGA
chrX_C4	CGATTACCCGATAGGACGAATTGGAGCCAAGCGAGATTACAGTGGCATTCTTCTCTCATACGACAACATAGTATCCTCGA	CGATTACCCGATAGGACGAA	TTGGAGCCAAGCGAGATTACAGTGGCATTCTTCTCTCATA	chrX:16523432-16523472	CGACAACATAGTATCCTCGA
chrX_C4	CGATTACCCGATAGGACGAAAATGCCAATGTGTCTGATCCAGAGGAAGTTCCACCATGCCCGACAACATAGTATCCTCGA	CGATTACCCGATAGGACGAA	AATGCCAATGTGTCTGATCCAGAGGAAGTTCCACCATGCC	chrX:16523474-16523514	CGACAACATAGTATCCTCGA
chrX_C4	CGATTACCCGATAGGACGAAGACAGTGACCCATTTCCGAATGGAGACTTGGCCAGTTCCTCGACAACATAGTATCCTCGA	CGATTACCCGATAGGACGAA	GACAGTGACCCATTTCCGAATGGAGACTTGGCCAGTTCCT	chrX:16523516-16523556	CGACAACATAGTATCCTCGA
chrX_C4	CGATTACCCGATAGGACGAAACCCCGAACGGGTCCAAAGTCCCATGAAACATCAGTGGACCGACAACATAGTATCCTCGA	CGATTACCCGATAGGACGAA	ACCCCGAACGGGTCCAAAGTCCCATGAAACATCAGTGGAC	chrX:16523558-16523598	CGACAACATAGTATCCTCGA
chrX_C4	CGATTACCCGATAGGACGAAGTCTGGGAGCTGAGCTGTGGTCCTGTCAAGGAAACTCTTCCGACAACATAGTATCCTCGA	CGATTACCCGATAGGACGAA	GTCTGGGAGCTGAGCTGTGGTCCTGTCAAGGAAACTCTTC	chrX:16523600-16523640	CGACAACATAGTATCCTCGA
chrX_C4	CGATTACCCGATAGGACGAAGGTGAAAATAATCAGATGTGAAAATATGTGTCACTCTCAGCGACAACATAGTATCCTCGA	CGATTACCCGATAGGACGAA	GGTGAAAATAATCAGATGTGAAAATATGTGTCACTCTCAG	chrX:16523662-16523702	CGACAACATAGTATCCTCGA
chrX_C4	CGATTACCCGATAGGACGAATCTGATGGTATCGAGGGAGAGGGTTTGGGGTAGGGATGACCGACAACATAGTATCCTCGA	CGATTACCCGATAGGACGAA	TCTGATGGTATCGAGGGAGAGGGTTTGGGGTAGGGATGAC	chrX:16523704-16523744	CGACAACATAGTATCCTCGA
chrX_C4	CGATTACCCGATAGGACGAAGGAATATGATGAGAAGGAATGTCGCTTTCTAGAAGGTTGGCGACAACATAGTATCCTCGA	CGATTACCCGATAGGACGAA	GGAATATGATGAGAAGGAATGTCGCTTTCTAGAAGGTTGG	chrX:16523746-16523786	CGACAACATAGTATCCTCGA
chrX_C4	CGATTACCCGATAGGACGAACCCCTGATAGGTAGACACAGGAGGGTCAGAACTTAGCTAGCGACAACATAGTATCCTCGA	CGATTACCCGATAGGACGAA	CCCCTGATAGGTAGACACAGGAGGGTCAGAACTTAGCTAG	chrX:16523802-16523842	CGACAACATAGTATCCTCGA
chrX_C4	CGATTACCCGATAGGACGAACCCTGAAGCTTTATTTCACAGGGCAATAGGGAGAGCCCAGCGACAACATAGTATCCTCGA	CGATTACCCGATAGGACGAA	CCCTGAAGCTTTATTTCACAGGGCAATAGGGAGAGCCCAG	chrX:16523853-16523893	CGACAACATAGTATCCTCGA
chrX_C4	CGATTACCCGATAGGACGAATCTTCCTAAATAGGACTGCTACATGGTTTCCGGCTGTTACCGACAACATAGTATCCTCGA	CGATTACCCGATAGGACGAA	TCTTCCTAAATAGGACTGCTACATGGTTTCCGGCTGTTAC	chrX:16523895-16523935	CGACAACATAGTATCCTCGA
chrX_C4	CGATTACCCGATAGGACGAACGATATGAACTGAGGTGTAGTGGCAGTTCCAGTCCTAACTCGACAACATAGTATCCTCGA	CGATTACCCGATAGGACGAA	CGATATGAACTGAGGTGTAGTGGCAGTTCCAGTCCTAACT	chrX:16523937-16523977	CGACAACATAGTATCCTCGA
chrX_C4	CGATTACCCGATAGGACGAACATTGTGGTGTTTCTTACAGTCCTCATTATGATCTCTTGCCGACAACATAGTATCCTCGA	CGATTACCCGATAGGACGAA	CATTGTGGTGTTTCTTACAGTCCTCATTATGATCTCTTGC	chrX:16524010-16524050	CGACAACATAGTATCCTCGA
chrX_C4	CGATTACCCGATAGGACGAATAAAACCCTCAGGAGGGCTAAAGACTTTACCCCATCAAAACGACAACATAGTATCCTCGA	CGATTACCCGATAGGACGAA	TAAAACCCTCAGGAGGGCTAAAGACTTTACCCCATCAAAA	chrX:16524052-16524092	CGACAACATAGTATCCTCGA
chrX_C4	CGATTACCCGATAGGACGAACCAGTGATTTTGACTGGAATCTGCAAGTGCAACACTGATTCGACAACATAGTATCCTCGA	CGATTACCCGATAGGACGAA	CCAGTGATTTTGACTGGAATCTGCAAGTGCAACACTGATT	chrX:16524096-16524136	CGACAACATAGTATCCTCGA
chrX_C4	CGATTACCCGATAGGACGAAGGTCTGCCAACCAGTGCTGGTCATGAAACAGGTAGTAATACGACAACATAGTATCCTCGA	CGATTACCCGATAGGACGAA	GGTCTGCCAACCAGTGCTGGTCATGAAACAGGTAGTAATA	chrX:16524183-16524223	CGACAACATAGTATCCTCGA
chrX_C4	CGATTACCCGATAGGACGAAAACAACTATGCCTTTCCAGATAGCTTTACTGTGTATTTTCCGACAACATAGTATCCTCGA	CGATTACCCGATAGGACGAA	AACAACTATGCCTTTCCAGATAGCTTTACTGTGTATTTTC	chrX:16524240-16524280	CGACAACATAGTATCCTCGA
chrX_C4	CGATTACCCGATAGGACGAATAATTCCTTCAGGACATATCGTGAAACCAGTTATTCAAAGCGACAACATAGTATCCTCGA	CGATTACCCGATAGGACGAA	TAATTCCTTCAGGACATATCGTGAAACCAGTTATTCAAAG	chrX:16524291-16524331	CGACAACATAGTATCCTCGA
chrX_C4	CGATTACCCGATAGGACGAACTGGAGAGATGACTCAGTTGATTCCTCACATGCATGGGGACGACAACATAGTATCCTCGA	CGATTACCCGATAGGACGAA	CTGGAGAGATGACTCAGTTGATTCCTCACATGCATGGGGA	chrX:16524343-16524383	CGACAACATAGTATCCTCGA
chrX_C4	CGATTACCCGATAGGACGAAAAAAGCAACCCCATCAGCTTGGCATGGTGGCAATAGGCATCGACAACATAGTATCCTCGA	CGATTACCCGATAGGACGAA	AAAAGCAACCCCATCAGCTTGGCATGGTGGCAATAGGCAT	chrX:16524582-16524622	CGACAACATAGTATCCTCGA
chrX_C4	CGATTACCCGATAGGACGAAACTCTTATCATTCAAAGCAGAGAGAGGCAGATCACTATGACGACAACATAGTATCCTCGA	CGATTACCCGATAGGACGAA	ACTCTTATCATTCAAAGCAGAGAGAGGCAGATCACTATGA	chrX:16524624-16524664	CGACAACATAGTATCCTCGA
chrX_C4	CGATTACCCGATAGGACGAAGAAACCAGTGTGTGATGTTGAAAACTTTTATTTACTGCACCGACAACATAGTATCCTCGA	CGATTACCCGATAGGACGAA	GAAACCAGTGTGTGATGTTGAAAACTTTTATTTACTGCAC	chrX:16524695-16524735	CGACAACATAGTATCCTCGA
chrX_C4	CGATTACCCGATAGGACGAAAGGATGTGGGAAATTGTGTATCCTTGACAATTGTTGGCCACGACAACATAGTATCCTCGA	CGATTACCCGATAGGACGAA	AGGATGTGGGAAATTGTGTATCCTTGACAATTGTTGGCCA	chrX:16524737-16524777	CGACAACATAGTATCCTCGA
chrX_C4	CGATTACCCGATAGGACGAATAGCCAGCATATCCTATTGGTATATCCCAGGCCAGTGAGACGACAACATAGTATCCTCGA	CGATTACCCGATAGGACGAA	TAGCCAGCATATCCTATTGGTATATCCCAGGCCAGTGAGA	chrX:16524779-16524819	CGACAACATAGTATCCTCGA
chrX_C4	CGATTACCCGATAGGACGAATTTTAAGGTGGGTAGCACCTGATAATCTACAGAAAAGTTGCGACAACATAGTATCCTCGA	CGATTACCCGATAGGACGAA	TTTTAAGGTGGGTAGCACCTGATAATCTACAGAAAAGTTG	chrX:16524887-16524927	CGACAACATAGTATCCTCGA
chrX_C4	CGATTACCCGATAGGACGAAAAACACACACATGTGTATATACATCCATCCTTCATGCATCCGACAACATAGTATCCTCGA	CGATTACCCGATAGGACGAA	AAACACACACATGTGTATATACATCCATCCTTCATGCATC	chrX:16524974-16525014	CGACAACATAGTATCCTCGA
chrX_C4	CGATTACCCGATAGGACGAATCCAGACTCAGAAGAATACATGCATATACACAAACATACACGACAACATAGTATCCTCGA	CGATTACCCGATAGGACGAA	TCCAGACTCAGAAGAATACATGCATATACACAAACATACA	chrX:16525016-16525056	CGACAACATAGTATCCTCGA
chrX_C4	CGATTACCCGATAGGACGAAGCATAAACTTATGTAGTCTTCACTACAAGAATCAGTGTACCGACAACATAGTATCCTCGA	CGATTACCCGATAGGACGAA	GCATAAACTTATGTAGTCTTCACTACAAGAATCAGTGTAC	chrX:16525103-16525143	CGACAACATAGTATCCTCGA
chrX_C4	CGATTACCCGATAGGACGAATTTTGTTTGTTTAAAGTACCCCTTTTGTGTTGCTGTTGTGCGACAACATAGTATCCTCGA	CGATTACCCGATAGGACGAA	TTTTGTTTGTTTAAAGTACCCCTTTTGTGTTGCTGTTGTG	chrX:16525163-16525203	CGACAACATAGTATCCTCGA
chrX_C4	CGATTACCCGATAGGACGAATATTAAGCTTTGGACAGTTCATAAAGCAGAGGTTAATGTGCGACAACATAGTATCCTCGA	CGATTACCCGATAGGACGAA	TATTAAGCTTTGGACAGTTCATAAAGCAGAGGTTAATGTG	chrX:16525206-16525246	CGACAACATAGTATCCTCGA
chrX_C4	CGATTACCCGATAGGACGAAAAAATTGGTTGAGGTTGCATAACTTCATTTTGTTGCTCTCCGACAACATAGTATCCTCGA	CGATTACCCGATAGGACGAA	AAAATTGGTTGAGGTTGCATAACTTCATTTTGTTGCTCTC	chrX:16525262-16525302	CGACAACATAGTATCCTCGA
chrX_C4	CGATTACCCGATAGGACGAATTTAAACATATCCACTGCTATACCTCCTAACATTTGCTAGCGACAACATAGTATCCTCGA	CGATTACCCGATAGGACGAA	TTTAAACATATCCACTGCTATACCTCCTAACATTTGCTAG	chrX:16525358-16525398	CGACAACATAGTATCCTCGA
chrX_C4	CGATTACCCGATAGGACGAAGTCAATATGTCCATGAGTGTAAGGCTATCCACCAGATTACCGACAACATAGTATCCTCGA	CGATTACCCGATAGGACGAA	GTCAATATGTCCATGAGTGTAAGGCTATCCACCAGATTAC	chrX:16525462-16525502	CGACAACATAGTATCCTCGA
chrX_C4	CGATTACCCGATAGGACGAAGCAACCTACCAGAGAAGGAAACAGACTCTCCTTTTCTCTACGACAACATAGTATCCTCGA	CGATTACCCGATAGGACGAA	GCAACCTACCAGAGAAGGAAACAGACTCTCCTTTTCTCTA	chrX:16525504-16525544	CGACAACATAGTATCCTCGA
chrX_C4	CGATTACCCGATAGGACGAAACAGATTGGGTTTCAGGATCCCCTCTTATTTGCATGCTATCGACAACATAGTATCCTCGA	CGATTACCCGATAGGACGAA	ACAGATTGGGTTTCAGGATCCCCTCTTATTTGCATGCTAT	chrX:16525573-16525613	CGACAACATAGTATCCTCGA
chrX_C4	CGATTACCCGATAGGACGAAACTGCTGTGAGTTCATCACTGTGGTGGTCTTGTTATAACCCGACAACATAGTATCCTCGA	CGATTACCCGATAGGACGAA	ACTGCTGTGAGTTCATCACTGTGGTGGTCTTGTTATAACC	chrX:16525660-16525700	CGACAACATAGTATCCTCGA
chrX_C4	CGATTACCCGATAGGACGAAAAGACATTACTGTGTTCTTGTCCTCCCCGATGTATAGTTCCGACAACATAGTATCCTCGA	CGATTACCCGATAGGACGAA	AAGACATTACTGTGTTCTTGTCCTCCCCGATGTATAGTTC	chrX:16525702-16525742	CGACAACATAGTATCCTCGA
chrX_C4	CGATTACCCGATAGGACGAAACAGTCTTTCTGCCACCTCTTAATCTTCCCTGAACCTTAACGACAACATAGTATCCTCGA	CGATTACCCGATAGGACGAA	ACAGTCTTTCTGCCACCTCTTAATCTTCCCTGAACCTTAA	chrX:16525744-16525784	CGACAACATAGTATCCTCGA
chrX_C4	CGATTACCCGATAGGACGAAGCATGGGAAGTGGCATAGCTGTTCCAGTTGGGGATGAGCACGACAACATAGTATCCTCGA	CGATTACCCGATAGGACGAA	GCATGGGAAGTGGCATAGCTGTTCCAGTTGGGGATGAGCA	chrX:16525786-16525826	CGACAACATAGTATCCTCGA
chrX_C4	CGATTACCCGATAGGACGAACCACTGTCATTTATGCTCTAGATTTGTAGTAGCTGTGAGTCGACAACATAGTATCCTCGA	CGATTACCCGATAGGACGAA	CCACTGTCATTTATGCTCTAGATTTGTAGTAGCTGTGAGT	chrX:16525828-16525868	CGACAACATAGTATCCTCGA
chrX_C4	CGATTACCCGATAGGACGAACAGTGTTTATTGACTGCTGTGCATTGCACGAAGCTTCTCTCGACAACATAGTATCCTCGA	CGATTACCCGATAGGACGAA	CAGTGTTTATTGACTGCTGTGCATTGCACGAAGCTTCTCT	chrX:16525870-16525910	CGACAACATAGTATCCTCGA
chrX_C4	CGATTACCCGATAGGACGAAATTTACTTTTGTTAGCTTAATTTGTGTGTGTGCATGCCTCCGACAACATAGTATCCTCGA	CGATTACCCGATAGGACGAA	ATTTACTTTTGTTAGCTTAATTTGTGTGTGTGCATGCCTC	chrX:16525962-16526002	CGACAACATAGTATCCTCGA
chrX_C4	CGATTACCCGATAGGACGAAAGTGTGTGTGTGGTATGTATTCACTCATGCACATGTACCCCGACAACATAGTATCCTCGA	CGATTACCCGATAGGACGAA	AGTGTGTGTGTGGTATGTATTCACTCATGCACATGTACCC	chrX:16526004-16526044	CGACAACATAGTATCCTCGA
chrX_C4	CGATTACCCGATAGGACGAAGAAGACCTTGGTTGTTGATACTTTCCTATCACCAGAGTCCCGACAACATAGTATCCTCGA	CGATTACCCGATAGGACGAA	GAAGACCTTGGTTGTTGATACTTTCCTATCACCAGAGTCC	chrX:16526046-16526086	CGACAACATAGTATCCTCGA
chrX_C4	CGATTACCCGATAGGACGAAGGCTTGGCATCAAGAGCCTTTATCCATAGACCCCTCCACTCGACAACATAGTATCCTCGA	CGATTACCCGATAGGACGAA	GGCTTGGCATCAAGAGCCTTTATCCATAGACCCCTCCACT	chrX:16526109-16526149	CGACAACATAGTATCCTCGA
chrX_C4	CGATTACCCGATAGGACGAATAGGGGAGTTTGAAACTAGGTTAATTTAGCAAAATGGTAGCGACAACATAGTATCCTCGA	CGATTACCCGATAGGACGAA	TAGGGGAGTTTGAAACTAGGTTAATTTAGCAAAATGGTAG	chrX:16526164-16526204	CGACAACATAGTATCCTCGA
chrX_C4	CGATTACCCGATAGGACGAAGTAGGGCATAAGACCTCCCATTGAGCATATGACCTTCCAACGACAACATAGTATCCTCGA	CGATTACCCGATAGGACGAA	GTAGGGCATAAGACCTCCCATTGAGCATATGACCTTCCAA	chrX:16526206-16526246	CGACAACATAGTATCCTCGA
chrX_C4	CGATTACCCGATAGGACGAACATTGGTTCTTTGAAGGTTTACAGTGCCCATTTTGATTTCCGACAACATAGTATCCTCGA	CGATTACCCGATAGGACGAA	CATTGGTTCTTTGAAGGTTTACAGTGCCCATTTTGATTTC	chrX:16526248-16526288	CGACAACATAGTATCCTCGA
chrX_C4	CGATTACCCGATAGGACGAATCCTGTGAAGTAGCCTTAAATTCAATCAGAAAACTGTATGCGACAACATAGTATCCTCGA	CGATTACCCGATAGGACGAA	TCCTGTGAAGTAGCCTTAAATTCAATCAGAAAACTGTATG	chrX:16526290-16526330	CGACAACATAGTATCCTCGA
chrX_C4	CGATTACCCGATAGGACGAAAGGCCACTAGGCTAGAAATGTTATCCAAAGCTGTGAATCACGACAACATAGTATCCTCGA	CGATTACCCGATAGGACGAA	AGGCCACTAGGCTAGAAATGTTATCCAAAGCTGTGAATCA	chrX:16526332-16526372	CGACAACATAGTATCCTCGA
chrX_C4	CGATTACCCGATAGGACGAACAAGCTCCAATAATGACTAGGTGGCTAGATATAACCAATACGACAACATAGTATCCTCGA	CGATTACCCGATAGGACGAA	CAAGCTCCAATAATGACTAGGTGGCTAGATATAACCAATA	chrX:16526374-16526414	CGACAACATAGTATCCTCGA
chrX_C4	CGATTACCCGATAGGACGAAACAACAATAGCAGGTTAGCTAAAGGCTTTTCCAGTGTTATCGACAACATAGTATCCTCGA	CGATTACCCGATAGGACGAA	ACAACAATAGCAGGTTAGCTAAAGGCTTTTCCAGTGTTAT	chrX:16526416-16526456	CGACAACATAGTATCCTCGA
chrX_C4	CGATTACCCGATAGGACGAACACATGTAATGGCTTCAATATGCTGGACATGGGATCAAGACGACAACATAGTATCCTCGA	CGATTACCCGATAGGACGAA	CACATGTAATGGCTTCAATATGCTGGACATGGGATCAAGA	chrX:16526458-16526498	CGACAACATAGTATCCTCGA
chrX_C4	CGATTACCCGATAGGACGAAAAAAGTGGGGATGGATCAGAATTGTTCTGTTAAAAGCTTCCGACAACATAGTATCCTCGA	CGATTACCCGATAGGACGAA	AAAAGTGGGGATGGATCAGAATTGTTCTGTTAAAAGCTTC	chrX:16526535-16526575	CGACAACATAGTATCCTCGA
chrX_C4	CGATTACCCGATAGGACGAATACCAAGACACCATCAGATGTAAACTTGAACTTTGGTGTCCGACAACATAGTATCCTCGA	CGATTACCCGATAGGACGAA	TACCAAGACACCATCAGATGTAAACTTGAACTTTGGTGTC	chrX:16526577-16526617	CGACAACATAGTATCCTCGA
chrX_C4	CGATTACCCGATAGGACGAATGCTTATCACCACCCTCCAAGAGCCCTATCTTTTGAAGAGCGACAACATAGTATCCTCGA	CGATTACCCGATAGGACGAA	TGCTTATCACCACCCTCCAAGAGCCCTATCTTTTGAAGAG	chrX:16526621-16526661	CGACAACATAGTATCCTCGA
chrX_C4	CGATTACCCGATAGGACGAAGACTGAACTTAAGAGGTTCAATGAGGACAAACCACACTCACGACAACATAGTATCCTCGA	CGATTACCCGATAGGACGAA	GACTGAACTTAAGAGGTTCAATGAGGACAAACCACACTCA	chrX:16526694-16526734	CGACAACATAGTATCCTCGA
chrX_C4	CGATTACCCGATAGGACGAATGTGCCCATGAGCCAGTTCCTCAAATGAGGCTTTCATCTCCGACAACATAGTATCCTCGA	CGATTACCCGATAGGACGAA	TGTGCCCATGAGCCAGTTCCTCAAATGAGGCTTTCATCTC	chrX:16526736-16526776	CGACAACATAGTATCCTCGA
chrX_C4	CGATTACCCGATAGGACGAAATTAAAATATGCACACTTTTATGTCTGGTCTCTTAGACCCCGACAACATAGTATCCTCGA	CGATTACCCGATAGGACGAA	ATTAAAATATGCACACTTTTATGTCTGGTCTCTTAGACCC	chrX:16526825-16526865	CGACAACATAGTATCCTCGA
chrX_C4	CGATTACCCGATAGGACGAAAAAATCATCATTCTTTCATCTGATATTCTTGGCATTGCGCCGACAACATAGTATCCTCGA	CGATTACCCGATAGGACGAA	AAAATCATCATTCTTTCATCTGATATTCTTGGCATTGCGC	chrX:16526882-16526922	CGACAACATAGTATCCTCGA
chrX_C4	CGATTACCCGATAGGACGAATTATAAATGATGATCAAGCTGAACATGATGGCCTGAGTCTCGACAACATAGTATCCTCGA	CGATTACCCGATAGGACGAA	TTATAAATGATGATCAAGCTGAACATGATGGCCTGAGTCT	chrX:16526924-16526964	CGACAACATAGTATCCTCGA
chrX_C4	CGATTACCCGATAGGACGAAGCCTACACAGGGAGTTCCAGAACATCCCTAATTTTATGGTCGACAACATAGTATCCTCGA	CGATTACCCGATAGGACGAA	GCCTACACAGGGAGTTCCAGAACATCCCTAATTTTATGGT	chrX:16527024-16527064	CGACAACATAGTATCCTCGA
chrX_C4	CGATTACCCGATAGGACGAAATTCCAATATTCAAATAACCAGTGTTAACATGCTGAGTGCCGACAACATAGTATCCTCGA	CGATTACCCGATAGGACGAA	ATTCCAATATTCAAATAACCAGTGTTAACATGCTGAGTGC	chrX:16527137-16527177	CGACAACATAGTATCCTCGA
chrX_C4	CGATTACCCGATAGGACGAAAAAACGGGCTAAACTATGTTACTTTCCTGTGTGCTCTCATCGACAACATAGTATCCTCGA	CGATTACCCGATAGGACGAA	AAAACGGGCTAAACTATGTTACTTTCCTGTGTGCTCTCAT	chrX:16527182-16527222	CGACAACATAGTATCCTCGA
chrX_C4	CGATTACCCGATAGGACGAAATATCTGTGTTGTCTGTGAAAGATATGTGTATGTTATGCCCGACAACATAGTATCCTCGA	CGATTACCCGATAGGACGAA	ATATCTGTGTTGTCTGTGAAAGATATGTGTATGTTATGCC	chrX:16527333-16527373	CGACAACATAGTATCCTCGA
chrX_C4	CGATTACCCGATAGGACGAACTATAGTTAGAGAGCTTGTGAGCTACCATGTGTGTTCTCTCGACAACATAGTATCCTCGA	CGATTACCCGATAGGACGAA	CTATAGTTAGAGAGCTTGTGAGCTACCATGTGTGTTCTCT	chrX:16527409-16527449	CGACAACATAGTATCCTCGA
chrX_C4	CGATTACCCGATAGGACGAACATGACAGTGTTATAGCAACTGTATGGGTTAATATTTTGCCGACAACATAGTATCCTCGA	CGATTACCCGATAGGACGAA	CATGACAGTGTTATAGCAACTGTATGGGTTAATATTTTGC	chrX:16527587-16527627	CGACAACATAGTATCCTCGA
chrX_C4	CGATTACCCGATAGGACGAATTTTCCTAAGAGTATAGTCCGGAGGAAGGAACTATAGACACGACAACATAGTATCCTCGA	CGATTACCCGATAGGACGAA	TTTTCCTAAGAGTATAGTCCGGAGGAAGGAACTATAGACA	chrX:16527701-16527741	CGACAACATAGTATCCTCGA
chrX_C4	CGATTACCCGATAGGACGAAATCCCTGAATGTACACCAAATGCCTTTGATCACAGCACTCCGACAACATAGTATCCTCGA	CGATTACCCGATAGGACGAA	ATCCCTGAATGTACACCAAATGCCTTTGATCACAGCACTC	chrX:16527743-16527783	CGACAACATAGTATCCTCGA
chrX_C4	CGATTACCCGATAGGACGAAACAGAGTAAGCTCCAGGACAGCAGCAATTTAGTTTTCTCACGACAACATAGTATCCTCGA	CGATTACCCGATAGGACGAA	ACAGAGTAAGCTCCAGGACAGCAGCAATTTAGTTTTCTCA	chrX:16527830-16527870	CGACAACATAGTATCCTCGA
chrX_C4	CGATTACCCGATAGGACGAATTTGAAGATGTTGTCTCTTCTCCAATGGGTGTTTGTCAAACGACAACATAGTATCCTCGA	CGATTACCCGATAGGACGAA	TTTGAAGATGTTGTCTCTTCTCCAATGGGTGTTTGTCAAA	chrX:16527879-16527919	CGACAACATAGTATCCTCGA
chrX_C4	CGATTACCCGATAGGACGAAAGGAATTGACTATGTCCTATTGATCTTCCCTGTATATTTCCGACAACATAGTATCCTCGA	CGATTACCCGATAGGACGAA	AGGAATTGACTATGTCCTATTGATCTTCCCTGTATATTTC	chrX:16527953-16527993	CGACAACATAGTATCCTCGA
chrX_C4	CGATTACCCGATAGGACGAATGCCAGCACCTGGTTTAAAGTATCTTGACATATAGAGGTGCGACAACATAGTATCCTCGA	CGATTACCCGATAGGACGAA	TGCCAGCACCTGGTTTAAAGTATCTTGACATATAGAGGTG	chrX:16527995-16528035	CGACAACATAGTATCCTCGA
chrX_C4	CGATTACCCGATAGGACGAACCTCCCCAAAAGTCATAGCTTAGCTAACAATAACCCTAGTCGACAACATAGTATCCTCGA	CGATTACCCGATAGGACGAA	CCTCCCCAAAAGTCATAGCTTAGCTAACAATAACCCTAGT	chrX:16528037-16528077	CGACAACATAGTATCCTCGA
chrX_C4	CGATTACCCGATAGGACGAATTTTCTTATTGATCCAAGAGACTTCAGGGACAAGGCAGGACGACAACATAGTATCCTCGA	CGATTACCCGATAGGACGAA	TTTTCTTATTGATCCAAGAGACTTCAGGGACAAGGCAGGA	chrX:16528099-16528139	CGACAACATAGTATCCTCGA
chrX_C4	CGATTACCCGATAGGACGAAATTTCTCTTTATTGACTCCCAGAACTAGAAATAAAACCCCCGACAACATAGTATCCTCGA	CGATTACCCGATAGGACGAA	ATTTCTCTTTATTGACTCCCAGAACTAGAAATAAAACCCC	chrX:16528146-16528186	CGACAACATAGTATCCTCGA
chrX_C4	CGATTACCCGATAGGACGAATCCTAAGGACAATGTAAATGGTAGACATAGGACTTAAGAGCGACAACATAGTATCCTCGA	CGATTACCCGATAGGACGAA	TCCTAAGGACAATGTAAATGGTAGACATAGGACTTAAGAG	chrX:16528188-16528228	CGACAACATAGTATCCTCGA
chrX_C4	CGATTACCCGATAGGACGAAGTTGACCTGGAACTCTTCTGGAAGTCTCAGGTAAGAGGATCGACAACATAGTATCCTCGA	CGATTACCCGATAGGACGAA	GTTGACCTGGAACTCTTCTGGAAGTCTCAGGTAAGAGGAT	chrX:16528230-16528270	CGACAACATAGTATCCTCGA
chrX_C4	CGATTACCCGATAGGACGAATTTTAAATTGTCAGAGGAGAACAGCAATCAGTAGTCATAGCGACAACATAGTATCCTCGA	CGATTACCCGATAGGACGAA	TTTTAAATTGTCAGAGGAGAACAGCAATCAGTAGTCATAG	chrX:16528301-16528341	CGACAACATAGTATCCTCGA
chrX_C4	CGATTACCCGATAGGACGAAAGATGTAAAATCAATGAACTACAGCAGTGATGAGCATGGCCGACAACATAGTATCCTCGA	CGATTACCCGATAGGACGAA	AGATGTAAAATCAATGAACTACAGCAGTGATGAGCATGGC	chrX:16528343-16528383	CGACAACATAGTATCCTCGA
chrX_C4	CGATTACCCGATAGGACGAAGTGATAACAGGACTTGTCTCAGAAGTATCTAGCAGTAGTTCGACAACATAGTATCCTCGA	CGATTACCCGATAGGACGAA	GTGATAACAGGACTTGTCTCAGAAGTATCTAGCAGTAGTT	chrX:16528400-16528440	CGACAACATAGTATCCTCGA
chrX_C4	CGATTACCCGATAGGACGAATTTTCCTGATGAGAAAGATGAGGGCCCAGAGCTTGTGTGTGTTCACGATATTACGTGCGT	CGATTACCCGATAGGACGAA	TTTTCCTGATGAGAAAGATGAGGGCCCAGAGCTTGTGTGT	chrX:17506196-17506236	GTTCACGATATTACGTGCGT
chrX_C4	CGATTACCCGATAGGACGAAGGGGCAAGGTCTGGGTGAGCTGAAAGCCTGGGCTGTACCCGTTCACGATATTACGTGCGT	CGATTACCCGATAGGACGAA	GGGGCAAGGTCTGGGTGAGCTGAAAGCCTGGGCTGTACCC	chrX:17506255-17506295	GTTCACGATATTACGTGCGT
chrX_C4	CGATTACCCGATAGGACGAAGGTGCCCAGAGACATGATTATAAAATATGCACTGTGCCCAGTTCACGATATTACGTGCGT	CGATTACCCGATAGGACGAA	GGTGCCCAGAGACATGATTATAAAATATGCACTGTGCCCA	chrX:17506297-17506337	GTTCACGATATTACGTGCGT
chrX_C4	CGATTACCCGATAGGACGAAGATAGACACTCTACATCATGCAGACTTATATCTGAGGAGAGTTCACGATATTACGTGCGT	CGATTACCCGATAGGACGAA	GATAGACACTCTACATCATGCAGACTTATATCTGAGGAGA	chrX:17506339-17506379	GTTCACGATATTACGTGCGT
chrX_C4	CGATTACCCGATAGGACGAAGAACCAAAGGATGGTTCTCCATACTCCCTGAGAAATATGGGTTCACGATATTACGTGCGT	CGATTACCCGATAGGACGAA	GAACCAAAGGATGGTTCTCCATACTCCCTGAGAAATATGG	chrX:17506381-17506421	GTTCACGATATTACGTGCGT
chrX_C4	CGATTACCCGATAGGACGAATAGAAATTATCAAGAAAGCTAGGCTTTTCCAAGTATGTGCGTTCACGATATTACGTGCGT	CGATTACCCGATAGGACGAA	TAGAAATTATCAAGAAAGCTAGGCTTTTCCAAGTATGTGC	chrX:17506453-17506493	GTTCACGATATTACGTGCGT
chrX_C4	CGATTACCCGATAGGACGAACACCCCACCAACCTCTACCCTTGCCTTGTGTCTGTGGATCGTTCACGATATTACGTGCGT	CGATTACCCGATAGGACGAA	CACCCCACCAACCTCTACCCTTGCCTTGTGTCTGTGGATC	chrX:17506495-17506535	GTTCACGATATTACGTGCGT
chrX_C4	CGATTACCCGATAGGACGAAACCGAAATTCTCAGCTACCACTCCAGTCAGTGCCAGGCCTGTTCACGATATTACGTGCGT	CGATTACCCGATAGGACGAA	ACCGAAATTCTCAGCTACCACTCCAGTCAGTGCCAGGCCT	chrX:17506537-17506577	GTTCACGATATTACGTGCGT
chrX_C4	CGATTACCCGATAGGACGAACTACATGCTGCTTTGTTCCCTACAATTATGGTCATGGGACGTTCACGATATTACGTGCGT	CGATTACCCGATAGGACGAA	CTACATGCTGCTTTGTTCCCTACAATTATGGTCATGGGAC	chrX:17506579-17506619	GTTCACGATATTACGTGCGT
chrX_C4	CGATTACCCGATAGGACGAATGCTTTTGTCATAGTGTTTGGTTAGCAATAGAAAAGTAGGGTTCACGATATTACGTGCGT	CGATTACCCGATAGGACGAA	TGCTTTTGTCATAGTGTTTGGTTAGCAATAGAAAAGTAGG	chrX:17506669-17506709	GTTCACGATATTACGTGCGT
chrX_C4	CGATTACCCGATAGGACGAAAGACATTCAGTAACTCTGAATTGTGAGCCAGAATTAAATCGTTCACGATATTACGTGCGT	CGATTACCCGATAGGACGAA	AGACATTCAGTAACTCTGAATTGTGAGCCAGAATTAAATC	chrX:17506711-17506751	GTTCACGATATTACGTGCGT
chrX_C4	CGATTACCCGATAGGACGAAGTATTGAATATGTACTGTTTTCTTTTCCTGCCATTGTTCCGTTCACGATATTACGTGCGT	CGATTACCCGATAGGACGAA	GTATTGAATATGTACTGTTTTCTTTTCCTGCCATTGTTCC	chrX:17506848-17506888	GTTCACGATATTACGTGCGT
chrX_C4	CGATTACCCGATAGGACGAAGGCATTGATTAAAAGCATATGAGAGGAAGTGTATAGTTTCGTTCACGATATTACGTGCGT	CGATTACCCGATAGGACGAA	GGCATTGATTAAAAGCATATGAGAGGAAGTGTATAGTTTC	chrX:17506953-17506993	GTTCACGATATTACGTGCGT
chrX_C4	CGATTACCCGATAGGACGAATGCAAACATGGTACCACTTCTGTAAGGAAGTCAGTTCCCTGTTCACGATATTACGTGCGT	CGATTACCCGATAGGACGAA	TGCAAACATGGTACCACTTCTGTAAGGAAGTCAGTTCCCT	chrX:17506995-17507035	GTTCACGATATTACGTGCGT
chrX_C4	CGATTACCCGATAGGACGAATTTGTTTGGTTGTGTTAGAGATAGAACCCAGAGCCTTATCGTTCACGATATTACGTGCGT	CGATTACCCGATAGGACGAA	TTTGTTTGGTTGTGTTAGAGATAGAACCCAGAGCCTTATC	chrX:17507063-17507103	GTTCACGATATTACGTGCGT
chrX_C4	CGATTACCCGATAGGACGAACTGGACAAACACTGTAACACTGATCTACATCACTAGTCTTGTTCACGATATTACGTGCGT	CGATTACCCGATAGGACGAA	CTGGACAAACACTGTAACACTGATCTACATCACTAGTCTT	chrX:17507107-17507147	GTTCACGATATTACGTGCGT
chrX_C4	CGATTACCCGATAGGACGAACACTTGTTTCAGAGTAATCAATAAAGAAACCAGTATAGGCGTTCACGATATTACGTGCGT	CGATTACCCGATAGGACGAA	CACTTGTTTCAGAGTAATCAATAAAGAAACCAGTATAGGC	chrX:17507168-17507208	GTTCACGATATTACGTGCGT
chrX_C4	CGATTACCCGATAGGACGAAAGGACCCCAAGAAGTTCTCAGCACAATGGAGATTTATTTGGTTCACGATATTACGTGCGT	CGATTACCCGATAGGACGAA	AGGACCCCAAGAAGTTCTCAGCACAATGGAGATTTATTTG	chrX:17507210-17507250	GTTCACGATATTACGTGCGT
chrX_C4	CGATTACCCGATAGGACGAAGAGAGAGCCATGTTTGCTATTCTCTGGCTTTCTAGAGCCTGTTCACGATATTACGTGCGT	CGATTACCCGATAGGACGAA	GAGAGAGCCATGTTTGCTATTCTCTGGCTTTCTAGAGCCT	chrX:17507668-17507708	GTTCACGATATTACGTGCGT
chrX_C4	CGATTACCCGATAGGACGAATAGAGGGCAAGCTAATAAAAGGCATCTTGTTGTGTGATACGTTCACGATATTACGTGCGT	CGATTACCCGATAGGACGAA	TAGAGGGCAAGCTAATAAAAGGCATCTTGTTGTGTGATAC	chrX:17507710-17507750	GTTCACGATATTACGTGCGT
chrX_C4	CGATTACCCGATAGGACGAACTTTTCCTGGGAAGTTGGAACATACATCTACTCACCCTAGGTTCACGATATTACGTGCGT	CGATTACCCGATAGGACGAA	CTTTTCCTGGGAAGTTGGAACATACATCTACTCACCCTAG	chrX:17507752-17507792	GTTCACGATATTACGTGCGT
chrX_C4	CGATTACCCGATAGGACGAAAGGAAACCCACGTCTAACTAAAGTACAGATACCATCAAAGGTTCACGATATTACGTGCGT	CGATTACCCGATAGGACGAA	AGGAAACCCACGTCTAACTAAAGTACAGATACCATCAAAG	chrX:17507794-17507834	GTTCACGATATTACGTGCGT
chrX_C4	CGATTACCCGATAGGACGAAATCGTAATTACTTACAGAAGAAATATGGGTGAAGGGTTACGTTCACGATATTACGTGCGT	CGATTACCCGATAGGACGAA	ATCGTAATTACTTACAGAAGAAATATGGGTGAAGGGTTAC	chrX:17507860-17507900	GTTCACGATATTACGTGCGT
chrX_C4	CGATTACCCGATAGGACGAAAAAACAGTGGGAACCTGGAGCACCACTACATGGCCTGTAGGTTCACGATATTACGTGCGT	CGATTACCCGATAGGACGAA	AAAACAGTGGGAACCTGGAGCACCACTACATGGCCTGTAG	chrX:17507971-17508011	GTTCACGATATTACGTGCGT
chrX_C4	CGATTACCCGATAGGACGAATGTTCAACAAGCTGGAGAGTGTCTCTTCCAAGTGATATAGGTTCACGATATTACGTGCGT	CGATTACCCGATAGGACGAA	TGTTCAACAAGCTGGAGAGTGTCTCTTCCAAGTGATATAG	chrX:17508013-17508053	GTTCACGATATTACGTGCGT
chrX_C4	CGATTACCCGATAGGACGAAGGCCTAACATTGTTCCAGGTACCTCGGCTATCTCTATGTCGTTCACGATATTACGTGCGT	CGATTACCCGATAGGACGAA	GGCCTAACATTGTTCCAGGTACCTCGGCTATCTCTATGTC	chrX:17508055-17508095	GTTCACGATATTACGTGCGT
chrX_C4	CGATTACCCGATAGGACGAACTGTTTATTTAGTCTTGATGAAAATGGGGCCTAATGAATCGTTCACGATATTACGTGCGT	CGATTACCCGATAGGACGAA	CTGTTTATTTAGTCTTGATGAAAATGGGGCCTAATGAATC	chrX:17508170-17508210	GTTCACGATATTACGTGCGT
chrX_C4	CGATTACCCGATAGGACGAAGAGTTGTTTATCTTTATTCTTAAAGAGCTTCCTCCCAATCGTTCACGATATTACGTGCGT	CGATTACCCGATAGGACGAA	GAGTTGTTTATCTTTATTCTTAAAGAGCTTCCTCCCAATC	chrX:17508235-17508275	GTTCACGATATTACGTGCGT
chrX_C4	CGATTACCCGATAGGACGAATATCACCGGAATAGAAAGCAATTTAGTACATATAGCCTTCGTTCACGATATTACGTGCGT	CGATTACCCGATAGGACGAA	TATCACCGGAATAGAAAGCAATTTAGTACATATAGCCTTC	chrX:17508295-17508335	GTTCACGATATTACGTGCGT
chrX_C4	CGATTACCCGATAGGACGAACTCTTGTCAGTACTAGAGAGGTACATCTCAAGTACTATACGTTCACGATATTACGTGCGT	CGATTACCCGATAGGACGAA	CTCTTGTCAGTACTAGAGAGGTACATCTCAAGTACTATAC	chrX:17508337-17508377	GTTCACGATATTACGTGCGT
chrX_C4	CGATTACCCGATAGGACGAATAATAATCTAATTAGCAGTTCTAAACCTGTGGGTCTCAACGTTCACGATATTACGTGCGT	CGATTACCCGATAGGACGAA	TAATAATCTAATTAGCAGTTCTAAACCTGTGGGTCTCAAC	chrX:17508403-17508443	GTTCACGATATTACGTGCGT
chrX_C4	CGATTACCCGATAGGACGAAGGGGTCATCACGATATGAGGAACTAACTATCATAGAGTGTGTTCACGATATTACGTGCGT	CGATTACCCGATAGGACGAA	GGGGTCATCACGATATGAGGAACTAACTATCATAGAGTGT	chrX:17508490-17508530	GTTCACGATATTACGTGCGT
chrX_C4	CGATTACCCGATAGGACGAACACTATTAGGAGGTATGGCACTGTTAGTATGTCTCAGTCTGTTCACGATATTACGTGCGT	CGATTACCCGATAGGACGAA	CACTATTAGGAGGTATGGCACTGTTAGTATGTCTCAGTCT	chrX:17508591-17508631	GTTCACGATATTACGTGCGT
chrX_C4	CGATTACCCGATAGGACGAACAGCAATAGTAATCCCAACTAAGACACAAGTTTGGGAACCGTTCACGATATTACGTGCGT	CGATTACCCGATAGGACGAA	CAGCAATAGTAATCCCAACTAAGACACAAGTTTGGGAACC	chrX:17508807-17508847	GTTCACGATATTACGTGCGT
chrX_C4	CGATTACCCGATAGGACGAATATTCTAGAAGGACCAGACAGCAAATGTTTCAGACTTCACGTTCACGATATTACGTGCGT	CGATTACCCGATAGGACGAA	TATTCTAGAAGGACCAGACAGCAAATGTTTCAGACTTCAC	chrX:17508849-17508889	GTTCACGATATTACGTGCGT
chrX_C4	CGATTACCCGATAGGACGAATTTCTGTTCAGGCTGTGGCAACCTTCAGCTCTGCTGCTCCGTTCACGATATTACGTGCGT	CGATTACCCGATAGGACGAA	TTTCTGTTCAGGCTGTGGCAACCTTCAGCTCTGCTGCTCC	chrX:17508891-17508931	GTTCACGATATTACGTGCGT
chrX_C4	CGATTACCCGATAGGACGAAAGCAGATGGACAATATATTAAACAAATGAACAGTGTGGTCGTTCACGATATTACGTGCGT	CGATTACCCGATAGGACGAA	AGCAGATGGACAATATATTAAACAAATGAACAGTGTGGTC	chrX:17508936-17508976	GTTCACGATATTACGTGCGT
chrX_C4	CGATTACCCGATAGGACGAAGGTTCCAAGAAAACTTATTGCAGAAATTGACGTTAGGATGGTTCACGATATTACGTGCGT	CGATTACCCGATAGGACGAA	GGTTCCAAGAAAACTTATTGCAGAAATTGACGTTAGGATG	chrX:17508978-17509018	GTTCACGATATTACGTGCGT
chrX_C4	CGATTACCCGATAGGACGAAGGTAGCATATTGTATATAGTAAACTTGTAAGGAGTCCTACGTTCACGATATTACGTGCGT	CGATTACCCGATAGGACGAA	GGTAGCATATTGTATATAGTAAACTTGTAAGGAGTCCTAC	chrX:17509064-17509104	GTTCACGATATTACGTGCGT
chrX_C4	CGATTACCCGATAGGACGAATATATTACCGAGTCCTCTCATGCCAGACATGGTGACACATGTTCACGATATTACGTGCGT	CGATTACCCGATAGGACGAA	TATATTACCGAGTCCTCTCATGCCAGACATGGTGACACAT	chrX:17509106-17509146	GTTCACGATATTACGTGCGT
chrX_C4	CGATTACCCGATAGGACGAAGTGACCCTAGCACTCAGGAGACAAAGGTAGGAGTACACTAGTTCACGATATTACGTGCGT	CGATTACCCGATAGGACGAA	GTGACCCTAGCACTCAGGAGACAAAGGTAGGAGTACACTA	chrX:17509150-17509190	GTTCACGATATTACGTGCGT
chrX_C4	CGATTACCCGATAGGACGAATTTGAGCGTTCCAGACAAGTGTCTCAGCTGCCTAATGAGAGTTCACGATATTACGTGCGT	CGATTACCCGATAGGACGAA	TTTGAGCGTTCCAGACAAGTGTCTCAGCTGCCTAATGAGA	chrX:17509192-17509232	GTTCACGATATTACGTGCGT
chrX_C4	CGATTACCCGATAGGACGAAAAAACAGAAAAGTCCTTGCATGCTGGCTATGGTAGTATACGTTCACGATATTACGTGCGT	CGATTACCCGATAGGACGAA	AAAACAGAAAAGTCCTTGCATGCTGGCTATGGTAGTATAC	chrX:17509283-17509323	GTTCACGATATTACGTGCGT
chrX_C4	CGATTACCCGATAGGACGAACTGCAAGCCCAGCACTCCAAGCTGGAAGCAGAAAAGACTGGTTCACGATATTACGTGCGT	CGATTACCCGATAGGACGAA	CTGCAAGCCCAGCACTCCAAGCTGGAAGCAGAAAAGACTG	chrX:17509325-17509365	GTTCACGATATTACGTGCGT
chrX_C4	CGATTACCCGATAGGACGAATCAGGCCAGCCTGGGATACATAATGTGACCATGATGAACCGTTCACGATATTACGTGCGT	CGATTACCCGATAGGACGAA	TCAGGCCAGCCTGGGATACATAATGTGACCATGATGAACC	chrX:17509370-17509410	GTTCACGATATTACGTGCGT
chrX_C4	CGATTACCCGATAGGACGAATCCTTGAAAAGAAAGGAGAATCTTTCAAAATTCACATCCCGTTCACGATATTACGTGCGT	CGATTACCCGATAGGACGAA	TCCTTGAAAAGAAAGGAGAATCTTTCAAAATTCACATCCC	chrX:17509417-17509457	GTTCACGATATTACGTGCGT
chrX_C4	CGATTACCCGATAGGACGAAATTCTACTGCTGCATACTTCCTGGTGCCTCTCATCATTTTGTTCACGATATTACGTGCGT	CGATTACCCGATAGGACGAA	ATTCTACTGCTGCATACTTCCTGGTGCCTCTCATCATTTT	chrX:17509459-17509499	GTTCACGATATTACGTGCGT
chrX_C4	CGATTACCCGATAGGACGAAAGTAGGATATTGAATTTGTCACATGCTAGGCAAACATTTGGTTCACGATATTACGTGCGT	CGATTACCCGATAGGACGAA	AGTAGGATATTGAATTTGTCACATGCTAGGCAAACATTTG	chrX:17509503-17509543	GTTCACGATATTACGTGCGT
chrX_C4	CGATTACCCGATAGGACGAAGCATGCCATTGTAACTGGAAGGCTTCCTGATCAGTTATTTGTTCACGATATTACGTGCGT	CGATTACCCGATAGGACGAA	GCATGCCATTGTAACTGGAAGGCTTCCTGATCAGTTATTT	chrX:17509545-17509585	GTTCACGATATTACGTGCGT
chrX_C4	CGATTACCCGATAGGACGAATTTAGTCTCCTAACATGCAATAAACCTGTGTCTAAATTGCGTTCACGATATTACGTGCGT	CGATTACCCGATAGGACGAA	TTTAGTCTCCTAACATGCAATAAACCTGTGTCTAAATTGC	chrX:17509587-17509627	GTTCACGATATTACGTGCGT
chrX_C4	CGATTACCCGATAGGACGAACAGAATGATGAGAATTTGATGATCCACTAAGAGCTACAAGGTTCACGATATTACGTGCGT	CGATTACCCGATAGGACGAA	CAGAATGATGAGAATTTGATGATCCACTAAGAGCTACAAG	chrX:17509629-17509669	GTTCACGATATTACGTGCGT
chrX_C4	CGATTACCCGATAGGACGAAAGATTGATCCAAAATTGCCTTAATGGTCCATGCTGCCCTCGTTCACGATATTACGTGCGT	CGATTACCCGATAGGACGAA	AGATTGATCCAAAATTGCCTTAATGGTCCATGCTGCCCTC	chrX:17509671-17509711	GTTCACGATATTACGTGCGT
chrX_C4	CGATTACCCGATAGGACGAATCTTTATATCTAACCTCAATTTGTTGCTGCTATTCAGACCGTTCACGATATTACGTGCGT	CGATTACCCGATAGGACGAA	TCTTTATATCTAACCTCAATTTGTTGCTGCTATTCAGACC	chrX:17509727-17509767	GTTCACGATATTACGTGCGT
chrX_C4	CGATTACCCGATAGGACGAATCACAAAGAGTAAACATTCAATCTGTCACTTCCTTCAATGGTTCACGATATTACGTGCGT	CGATTACCCGATAGGACGAA	TCACAAAGAGTAAACATTCAATCTGTCACTTCCTTCAATG	chrX:17509790-17509830	GTTCACGATATTACGTGCGT
chrX_C4	CGATTACCCGATAGGACGAAACCCTCATCAGGAGGACAATTCACTTATAAGGCCAGCCTGGTTCACGATATTACGTGCGT	CGATTACCCGATAGGACGAA	ACCCTCATCAGGAGGACAATTCACTTATAAGGCCAGCCTG	chrX:17509832-17509872	GTTCACGATATTACGTGCGT
chrX_C4	CGATTACCCGATAGGACGAAAATCAAAATTTCCATGGATATAGGTAGCATATCCCCTTAGGTTCACGATATTACGTGCGT	CGATTACCCGATAGGACGAA	AATCAAAATTTCCATGGATATAGGTAGCATATCCCCTTAG	chrX:17509876-17509916	GTTCACGATATTACGTGCGT
chrX_C4	CGATTACCCGATAGGACGAAATCCCCTTAGAGCCACAAGCATTTTCCTAATGACAGTAATGTTCACGATATTACGTGCGT	CGATTACCCGATAGGACGAA	ATCCCCTTAGAGCCACAAGCATTTTCCTAATGACAGTAAT	chrX:17509918-17509958	GTTCACGATATTACGTGCGT
chrX_C4	CGATTACCCGATAGGACGAACACCTTTAATCCATGGTGCCTCTCTTAGCCAGCCTTATCTGTTCACGATATTACGTGCGT	CGATTACCCGATAGGACGAA	CACCTTTAATCCATGGTGCCTCTCTTAGCCAGCCTTATCT	chrX:17509960-17510000	GTTCACGATATTACGTGCGT
chrX_C4	CGATTACCCGATAGGACGAAATCCCTTCCACTCCCTGCAACACTCTACATAGGTACAGAAGTTCACGATATTACGTGCGT	CGATTACCCGATAGGACGAA	ATCCCTTCCACTCCCTGCAACACTCTACATAGGTACAGAA	chrX:17510002-17510042	GTTCACGATATTACGTGCGT
chrX_C4	CGATTACCCGATAGGACGAAAAAACACAGAGCTATGCATGTACCTCAGTTTGTAGAGTACGTTCACGATATTACGTGCGT	CGATTACCCGATAGGACGAA	AAAACACAGAGCTATGCATGTACCTCAGTTTGTAGAGTAC	chrX:17510046-17510086	GTTCACGATATTACGTGCGT
chrX_C4	CGATTACCCGATAGGACGAATACAAAGACCTGGGTTTGAACCCCAACACTCAGGAAAACCGTTCACGATATTACGTGCGT	CGATTACCCGATAGGACGAA	TACAAAGACCTGGGTTTGAACCCCAACACTCAGGAAAACC	chrX:17510098-17510138	GTTCACGATATTACGTGCGT
chrX_C4	CGATTACCCGATAGGACGAACCATGTTGGCACAAACCTGTGGAAGCAAAAGGATTAGAAGGTTCACGATATTACGTGCGT	CGATTACCCGATAGGACGAA	CCATGTTGGCACAAACCTGTGGAAGCAAAAGGATTAGAAG	chrX:17510140-17510180	GTTCACGATATTACGTGCGT
chrX_C4	CGATTACCCGATAGGACGAAAAAATTGAGACATGGCAATTGGGTTACATGACATCCTGTCGTTCACGATATTACGTGCGT	CGATTACCCGATAGGACGAA	AAAATTGAGACATGGCAATTGGGTTACATGACATCCTGTC	chrX:17510205-17510245	GTTCACGATATTACGTGCGT
chrX_C4	CGATTACCCGATAGGACGAAAAAACAGGTGTGGGGAGATTAAATAGCATGACAGTGGGTAGTTCACGATATTACGTGCGT	CGATTACCCGATAGGACGAA	AAAACAGGTGTGGGGAGATTAAATAGCATGACAGTGGGTA	chrX:17510247-17510287	GTTCACGATATTACGTGCGT
chrX_C4	CGATTACCCGATAGGACGAAATCATTTATCATAACTGACCTCTTCTGTAAACTTGTGTGGGTTCACGATATTACGTGCGT	CGATTACCCGATAGGACGAA	ATCATTTATCATAACTGACCTCTTCTGTAAACTTGTGTGG	chrX:17510302-17510342	GTTCACGATATTACGTGCGT
chrX_C4	CGATTACCCGATAGGACGAAAGCAAAGTCCACAAAGAAGTGTAGTGACTGGTGGGCAGCAGTTCACGATATTACGTGCGT	CGATTACCCGATAGGACGAA	AGCAAAGTCCACAAAGAAGTGTAGTGACTGGTGGGCAGCA	chrX:17510344-17510384	GTTCACGATATTACGTGCGT
chrX_C4	CGATTACCCGATAGGACGAAGCACAAGTGTGTCACAGATGGCAGAGGTGGGCTTACTGTGGTTCACGATATTACGTGCGT	CGATTACCCGATAGGACGAA	GCACAAGTGTGTCACAGATGGCAGAGGTGGGCTTACTGTG	chrX:17510386-17510426	GTTCACGATATTACGTGCGT
chrX_C4	CGATTACCCGATAGGACGAAGCTTTTCTGTGGTGCCCTCATTACCTGGGTCCTGGAAGGAGTTCACGATATTACGTGCGT	CGATTACCCGATAGGACGAA	GCTTTTCTGTGGTGCCCTCATTACCTGGGTCCTGGAAGGA	chrX:17510428-17510468	GTTCACGATATTACGTGCGT
chrX_C4	CGATTACCCGATAGGACGAACCTAGCTATATGTTTATGTGGGCAGATGTTCCTAGAAAGTGTTCACGATATTACGTGCGT	CGATTACCCGATAGGACGAA	CCTAGCTATATGTTTATGTGGGCAGATGTTCCTAGAAAGT	chrX:17510470-17510510	GTTCACGATATTACGTGCGT
chrX_C4	CGATTACCCGATAGGACGAAACAAAATGTGCTAAACACCTTAGACTTGCCACTGAGGTGAGTTCACGATATTACGTGCGT	CGATTACCCGATAGGACGAA	ACAAAATGTGCTAAACACCTTAGACTTGCCACTGAGGTGA	chrX:17510512-17510552	GTTCACGATATTACGTGCGT
chrX_C4	CGATTACCCGATAGGACGAACGTCACTCTTCCTTCTTTCTTGCTCTGTTTGGTTTTCAGAGTTCACGATATTACGTGCGT	CGATTACCCGATAGGACGAA	CGTCACTCTTCCTTCTTTCTTGCTCTGTTTGGTTTTCAGA	chrX:17510554-17510594	GTTCACGATATTACGTGCGT
chrX_C4	CGATTACCCGATAGGACGAATGGATCTCACTCAGTCTGGCCGTGAACTCACAGAGATTCAGTTCACGATATTACGTGCGT	CGATTACCCGATAGGACGAA	TGGATCTCACTCAGTCTGGCCGTGAACTCACAGAGATTCA	chrX:17510596-17510636	GTTCACGATATTACGTGCGT
chrX_C4	CGATTACCCGATAGGACGAACTGCCTCAAGAGTGCTAGATTAAGGTGTGTGCCACCAGGCGTTCACGATATTACGTGCGT	CGATTACCCGATAGGACGAA	CTGCCTCAAGAGTGCTAGATTAAGGTGTGTGCCACCAGGC	chrX:17510643-17510683	GTTCACGATATTACGTGCGT
chrX_C4	CGATTACCCGATAGGACGAAGGCAACACACTGTCTCTTTTCACTGTCACATTTATATGGCGTTCACGATATTACGTGCGT	CGATTACCCGATAGGACGAA	GGCAACACACTGTCTCTTTTCACTGTCACATTTATATGGC	chrX:17510685-17510725	GTTCACGATATTACGTGCGT
chrX_C4	CGATTACCCGATAGGACGAAACCTGCACATTGAGGACTCTACCACCAAACTCATAACCCGGTTCACGATATTACGTGCGT	CGATTACCCGATAGGACGAA	ACCTGCACATTGAGGACTCTACCACCAAACTCATAACCCG	chrX:17510754-17510794	GTTCACGATATTACGTGCGT
chrX_C4	CGATTACCCGATAGGACGAAACCTGCACATTGAGGACTCTACCACCAAACTCATAACCCCGTTCACGATATTACGTGCGT	CGATTACCCGATAGGACGAA	ACCTGCACATTGAGGACTCTACCACCAAACTCATAACCCC	chrX:17510822-17510862	GTTCACGATATTACGTGCGT
chrX_C4	CGATTACCCGATAGGACGAATTTTCCCTCCTGTAGGATGAGGGTAGAAATGTAGTAGACAGTTCACGATATTACGTGCGT	CGATTACCCGATAGGACGAA	TTTTCCCTCCTGTAGGATGAGGGTAGAAATGTAGTAGACA	chrX:17510906-17510946	GTTCACGATATTACGTGCGT
chrX_C4	CGATTACCCGATAGGACGAACACACACACGCACACACAACGCCAACCAAGATTTATGTCTGTTCACGATATTACGTGCGT	CGATTACCCGATAGGACGAA	CACACACACGCACACACAACGCCAACCAAGATTTATGTCT	chrX:17511044-17511084	GTTCACGATATTACGTGCGT
chrX_C4	CGATTACCCGATAGGACGAACCTTGTTACCATTTCCAAAAGGAAAATTACCAAATGTGACGTTCACGATATTACGTGCGT	CGATTACCCGATAGGACGAA	CCTTGTTACCATTTCCAAAAGGAAAATTACCAAATGTGAC	chrX:17511088-17511128	GTTCACGATATTACGTGCGT
chrX_C4	CGATTACCCGATAGGACGAATAAGCAGTGGCTGGAAATGAATCAGCTGAACTGCATCCACGTTCACGATATTACGTGCGT	CGATTACCCGATAGGACGAA	TAAGCAGTGGCTGGAAATGAATCAGCTGAACTGCATCCAC	chrX:17511130-17511170	GTTCACGATATTACGTGCGT
chrX_C4	CGATTACCCGATAGGACGAAGGGGAGGGGTATGTTTGCTCAGTAGTGTTTGAGATGAAACGTTCACGATATTACGTGCGT	CGATTACCCGATAGGACGAA	GGGGAGGGGTATGTTTGCTCAGTAGTGTTTGAGATGAAAC	chrX:17511195-17511235	GTTCACGATATTACGTGCGT
chrX_C4	CGATTACCCGATAGGACGAATTCCTGCCAGGATGAACAAGCCATCCAGTTCATTTGCCATGTTCACGATATTACGTGCGT	CGATTACCCGATAGGACGAA	TTCCTGCCAGGATGAACAAGCCATCCAGTTCATTTGCCAT	chrX:17511237-17511277	GTTCACGATATTACGTGCGT
chrX_C4	CGATTACCCGATAGGACGAATCCTTGGTTCTATGTTCCCCACTTTCATAACAATGTCATGGTTCACGATATTACGTGCGT	CGATTACCCGATAGGACGAA	TCCTTGGTTCTATGTTCCCCACTTTCATAACAATGTCATG	chrX:17511279-17511319	GTTCACGATATTACGTGCGT
chrX_C4	CGATTACCCGATAGGACGAACCTTATCTAGATAATCCCCTTATCTAGAAGACAGTGATTGGTTCACGATATTACGTGCGT	CGATTACCCGATAGGACGAA	CCTTATCTAGATAATCCCCTTATCTAGAAGACAGTGATTG	chrX:17511321-17511361	GTTCACGATATTACGTGCGT
chrX_C4	CGATTACCCGATAGGACGAATGAGAGCCACGAGGTTCTTAATCTGAGTAGCCTGGAATAAGTTCACGATATTACGTGCGT	CGATTACCCGATAGGACGAA	TGAGAGCCACGAGGTTCTTAATCTGAGTAGCCTGGAATAA	chrX:17511363-17511403	GTTCACGATATTACGTGCGT
chrX_C4	CGATTACCCGATAGGACGAATTTGGTGTTGCTGCCTCCACTTCCTTAAGTATGGTACTTTGTTCACGATATTACGTGCGT	CGATTACCCGATAGGACGAA	TTTGGTGTTGCTGCCTCCACTTCCTTAAGTATGGTACTTT	chrX:17511405-17511445	GTTCACGATATTACGTGCGT
chrX_C4	CGATTACCCGATAGGACGAAAAAAGATGATGTGCAAGCAACGGCAGAATGACACTTTCTCGTTCACGATATTACGTGCGT	CGATTACCCGATAGGACGAA	AAAAGATGATGTGCAAGCAACGGCAGAATGACACTTTCTC	chrX:17511449-17511489	GTTCACGATATTACGTGCGT
chrX_C4	CGATTACCCGATAGGACGAAGATGCTATGGGCCCTGCTACCTCCAGGGAGATGTTTCCAAGTTCACGATATTACGTGCGT	CGATTACCCGATAGGACGAA	GATGCTATGGGCCCTGCTACCTCCAGGGAGATGTTTCCAA	chrX:17511491-17511531	GTTCACGATATTACGTGCGT
chrX_C4	CGATTACCCGATAGGACGAAAGAGCTAAATACACTTCCCAAAATAGAGTCATACCTTTTGGTTCACGATATTACGTGCGT	CGATTACCCGATAGGACGAA	AGAGCTAAATACACTTCCCAAAATAGAGTCATACCTTTTG	chrX:17511535-17511575	GTTCACGATATTACGTGCGT
chrX_C4	CGATTACCCGATAGGACGAATTTTGTTTTGAGCCTCACATACCCTAGCCTGGCTAGTTCAGTTCACGATATTACGTGCGT	CGATTACCCGATAGGACGAA	TTTTGTTTTGAGCCTCACATACCCTAGCCTGGCTAGTTCA	chrX:17511608-17511648	GTTCACGATATTACGTGCGT
chrX_C4	CGATTACCCGATAGGACGAAACATTTGATCCTCCTGCCTCTACCTCTGGTGGGCTTTCAGGTTCACGATATTACGTGCGT	CGATTACCCGATAGGACGAA	ACATTTGATCCTCCTGCCTCTACCTCTGGTGGGCTTTCAG	chrX:17511678-17511718	GTTCACGATATTACGTGCGT
chrX_C4	CGATTACCCGATAGGACGAAAACCACCATGACTGTTTTGTACAGTGCTGAGGACTAAACTGTTCACGATATTACGTGCGT	CGATTACCCGATAGGACGAA	AACCACCATGACTGTTTTGTACAGTGCTGAGGACTAAACT	chrX:17511721-17511761	GTTCACGATATTACGTGCGT
chrX_C4	CGATTACCCGATAGGACGAAGGACTTTATGAATAGTGGCAATCACTCTACCAACTAAGCCGTTCACGATATTACGTGCGT	CGATTACCCGATAGGACGAA	GGACTTTATGAATAGTGGCAATCACTCTACCAACTAAGCC	chrX:17511763-17511803	GTTCACGATATTACGTGCGT
chrX_C4	CGATTACCCGATAGGACGAAATTCTTGACTGTATTATTAGTGGAGTAAAATCCTCCCTACGTTCACGATATTACGTGCGT	CGATTACCCGATAGGACGAA	ATTCTTGACTGTATTATTAGTGGAGTAAAATCCTCCCTAC	chrX:17511827-17511867	GTTCACGATATTACGTGCGT
chrX_C4	CGATTACCCGATAGGACGAAGTTGTGAAAACTTTACAACATTCCAATCTCTACCACTTAGGTTCACGATATTACGTGCGT	CGATTACCCGATAGGACGAA	GTTGTGAAAACTTTACAACATTCCAATCTCTACCACTTAG	chrX:17511871-17511911	GTTCACGATATTACGTGCGT
chrX_C4	CGATTACCCGATAGGACGAACAACAGCCCTTCCTCTGATGCCAGCTACCATGTACCAAACGTTCACGATATTACGTGCGT	CGATTACCCGATAGGACGAA	CAACAGCCCTTCCTCTGATGCCAGCTACCATGTACCAAAC	chrX:17511913-17511953	GTTCACGATATTACGTGCGT
chrX_C4	CGATTACCCGATAGGACGAATACATGTCTGTATTGGTGGCACTTGTTCAGGATTCATTTTATCGTATACTATCTCACGCC	CGATTACCCGATAGGACGAA	TACATGTCTGTATTGGTGGCACTTGTTCAGGATTCATTTT	chrX:18484002-18484042	ATCGTATACTATCTCACGCC
chrX_C4	CGATTACCCGATAGGACGAATTATAGGCTTTTACTGCTATGGGATTTCCTGAAATCATAGATCGTATACTATCTCACGCC	CGATTACCCGATAGGACGAA	TTATAGGCTTTTACTGCTATGGGATTTCCTGAAATCATAG	chrX:18484091-18484131	ATCGTATACTATCTCACGCC
chrX_C4	CGATTACCCGATAGGACGAAAGATGGTGGTCCTGCTTATACTGGAAACAACTTTATACAAATCGTATACTATCTCACGCC	CGATTACCCGATAGGACGAA	AGATGGTGGTCCTGCTTATACTGGAAACAACTTTATACAA	chrX:18484133-18484173	ATCGTATACTATCTCACGCC
chrX_C4	CGATTACCCGATAGGACGAACTGGAATTCCTTATAATCCATGGGACAAGGAATTGTTGATATCGTATACTATCTCACGCC	CGATTACCCGATAGGACGAA	CTGGAATTCCTTATAATCCATGGGACAAGGAATTGTTGAT	chrX:18484204-18484244	ATCGTATACTATCTCACGCC
chrX_C4	CGATTACCCGATAGGACGAATTTTAAAATTGCAATGCCAAGGAACTCTCTGAGTTATGAGATCGTATACTATCTCACGCC	CGATTACCCGATAGGACGAA	TTTTAAAATTGCAATGCCAAGGAACTCTCTGAGTTATGAG	chrX:18484319-18484359	ATCGTATACTATCTCACGCC
chrX_C4	CGATTACCCGATAGGACGAAAAAGGAGCATGCTAGCTGCCAGAGTGGTTAATGAGATACTATCGTATACTATCTCACGCC	CGATTACCCGATAGGACGAA	AAAGGAGCATGCTAGCTGCCAGAGTGGTTAATGAGATACT	chrX:18484395-18484435	ATCGTATACTATCTCACGCC
chrX_C4	CGATTACCCGATAGGACGAAGACAAAGACTCATGCTGATCATGAACTTGCTGAGTACCCTATCGTATACTATCTCACGCC	CGATTACCCGATAGGACGAA	GACAAAGACTCATGCTGATCATGAACTTGCTGAGTACCCT	chrX:18484437-18484477	ATCGTATACTATCTCACGCC
chrX_C4	CGATTACCCGATAGGACGAAATGATAGAGAAGCTGTATTGGGCCTATGTCCCTGATCCACATCGTATACTATCTCACGCC	CGATTACCCGATAGGACGAA	ATGATAGAGAAGCTGTATTGGGCCTATGTCCCTGATCCAC	chrX:18484484-18484524	ATCGTATACTATCTCACGCC
chrX_C4	CGATTACCCGATAGGACGAATAACATCCAACAGTTACATAAACTTAATTTGGAGCTCCAGATCGTATACTATCTCACGCC	CGATTACCCGATAGGACGAA	TAACATCCAACAGTTACATAAACTTAATTTGGAGCTCCAG	chrX:18484536-18484576	ATCGTATACTATCTCACGCC
chrX_C4	CGATTACCCGATAGGACGAAAAAAGTTTTCAGCTGCTGCTGATAATTGGTGGAAATCCTCATCGTATACTATCTCACGCC	CGATTACCCGATAGGACGAA	AAAAGTTTTCAGCTGCTGCTGATAATTGGTGGAAATCCTC	chrX:18484578-18484618	ATCGTATACTATCTCACGCC
chrX_C4	CGATTACCCGATAGGACGAATTCACCCTCTTGATGCCCCTCCTTGGACCTTTAATAAACCATCGTATACTATCTCACGCC	CGATTACCCGATAGGACGAA	TTCACCCTCTTGATGCCCCTCCTTGGACCTTTAATAAACC	chrX:18484622-18484662	ATCGTATACTATCTCACGCC
chrX_C4	CGATTACCCGATAGGACGAATAAAACAGCAGATTGATTCCATGGCATCAAGATCTTTGCAATCGTATACTATCTCACGCC	CGATTACCCGATAGGACGAA	TAAAACAGCAGATTGATTCCATGGCATCAAGATCTTTGCA	chrX:18484715-18484755	ATCGTATACTATCTCACGCC
chrX_C4	CGATTACCCGATAGGACGAATGCATTATCATAGTCTTGATTTGGCTGATAGAGGCCTTGCATCGTATACTATCTCACGCC	CGATTACCCGATAGGACGAA	TGCATTATCATAGTCTTGATTTGGCTGATAGAGGCCTTGC	chrX:18484757-18484797	ATCGTATACTATCTCACGCC
chrX_C4	CGATTACCCGATAGGACGAATTGATAAAATGAATCCAGTATGGGTATCAGCGTGGGTTGCATCGTATACTATCTCACGCC	CGATTACCCGATAGGACGAA	TTGATAAAATGAATCCAGTATGGGTATCAGCGTGGGTTGC	chrX:18484862-18484902	ATCGTATACTATCTCACGCC
chrX_C4	CGATTACCCGATAGGACGAAGGCTAAGCACCACAGGGGAAGGTCTCACACGGACCATTTCATCGTATACTATCTCACGCC	CGATTACCCGATAGGACGAA	GGCTAAGCACCACAGGGGAAGGTCTCACACGGACCATTTC	chrX:18484904-18484944	ATCGTATACTATCTCACGCC
chrX_C4	CGATTACCCGATAGGACGAACCGTGAGACAAACATGGTTTGCAAGGAGCTTGGTATCTGTATCGTATACTATCTCACGCC	CGATTACCCGATAGGACGAA	CCGTGAGACAAACATGGTTTGCAAGGAGCTTGGTATCTGT	chrX:18484952-18484992	ATCGTATACTATCTCACGCC
chrX_C4	CGATTACCCGATAGGACGAACCCTGCTGGTTAACACCCACTCATCCAAGGATGAGATGACATCGTATACTATCTCACGCC	CGATTACCCGATAGGACGAA	CCCTGCTGGTTAACACCCACTCATCCAAGGATGAGATGAC	chrX:18485108-18485148	ATCGTATACTATCTCACGCC
chrX_C4	CGATTACCCGATAGGACGAATTGATCACCCCAATTCATTAGGGCCTTAGTGAAAATAATTATCGTATACTATCTCACGCC	CGATTACCCGATAGGACGAA	TTGATCACCCCAATTCATTAGGGCCTTAGTGAAAATAATT	chrX:18485150-18485190	ATCGTATACTATCTCACGCC
chrX_C4	CGATTACCCGATAGGACGAAAAGGGAGGAGATGCAGGGAGCCATGGCCTCAGACATGGCCATCGTATACTATCTCACGCC	CGATTACCCGATAGGACGAA	AAGGGAGGAGATGCAGGGAGCCATGGCCTCAGACATGGCC	chrX:18485192-18485232	ATCGTATACTATCTCACGCC
chrX_C4	CGATTACCCGATAGGACGAAATAACTGAAAGAATGTTTATGGGTAGAGAGAACACTGACCATCGTATACTATCTCACGCC	CGATTACCCGATAGGACGAA	ATAACTGAAAGAATGTTTATGGGTAGAGAGAACACTGACC	chrX:18485284-18485324	ATCGTATACTATCTCACGCC
chrX_C4	CGATTACCCGATAGGACGAACCCCGAAGCCTCCTATTTCTTATATTGCCATCACAGAATAATCGTATACTATCTCACGCC	CGATTACCCGATAGGACGAA	CCCCGAAGCCTCCTATTTCTTATATTGCCATCACAGAATA	chrX:18485390-18485430	ATCGTATACTATCTCACGCC
chrX_C4	CGATTACCCGATAGGACGAATTTTCATGTTTCTTGTCCCTCTCACTCTCTCTCCCCTGCCATCGTATACTATCTCACGCC	CGATTACCCGATAGGACGAA	TTTTCATGTTTCTTGTCCCTCTCACTCTCTCTCCCCTGCC	chrX:18485472-18485512	ATCGTATACTATCTCACGCC
chrX_C4	CGATTACCCGATAGGACGAAAGGTCTCTGCTGATTATCTCTGCAGGTTGGGGCAGGCTCAATCGTATACTATCTCACGCC	CGATTACCCGATAGGACGAA	AGGTCTCTGCTGATTATCTCTGCAGGTTGGGGCAGGCTCA	chrX:18485514-18485554	ATCGTATACTATCTCACGCC
chrX_C4	CGATTACCCGATAGGACGAAGAGACAAGCCAGACAATCAGAGAGCCTGTGTAGGTATGAGATCGTATACTATCTCACGCC	CGATTACCCGATAGGACGAA	GAGACAAGCCAGACAATCAGAGAGCCTGTGTAGGTATGAG	chrX:18485556-18485596	ATCGTATACTATCTCACGCC
chrX_C4	CGATTACCCGATAGGACGAATCCTAGGTTACTTCTTCCAGCCTTAATATGAGGGTAGTGTATCGTATACTATCTCACGCC	CGATTACCCGATAGGACGAA	TCCTAGGTTACTTCTTCCAGCCTTAATATGAGGGTAGTGT	chrX:18485708-18485748	ATCGTATACTATCTCACGCC
chrX_C4	CGATTACCCGATAGGACGAATTCTGAAGGGAAACAGGAGGAATGGATCTAGGGGAAAGGAATCGTATACTATCTCACGCC	CGATTACCCGATAGGACGAA	TTCTGAAGGGAAACAGGAGGAATGGATCTAGGGGAAAGGA	chrX:18485808-18485848	ATCGTATACTATCTCACGCC
chrX_C4	CGATTACCCGATAGGACGAAAGTGAGGCTGGGAGGAACTTATAAGAGAATAGGCATGCAGATCGTATACTATCTCACGCC	CGATTACCCGATAGGACGAA	AGTGAGGCTGGGAGGAACTTATAAGAGAATAGGCATGCAG	chrX:18485850-18485890	ATCGTATACTATCTCACGCC
chrX_C4	CGATTACCCGATAGGACGAATACCCTTGAGTAGTTTCTTCAACGAAACTCTATTGGAGAAATCGTATACTATCTCACGCC	CGATTACCCGATAGGACGAA	TACCCTTGAGTAGTTTCTTCAACGAAACTCTATTGGAGAA	chrX:18485892-18485932	ATCGTATACTATCTCACGCC
chrX_C4	CGATTACCCGATAGGACGAATTATTAATTGAAACTGGCTTCTGGGTTAGGGATTGGTCTAATCGTATACTATCTCACGCC	CGATTACCCGATAGGACGAA	TTATTAATTGAAACTGGCTTCTGGGTTAGGGATTGGTCTA	chrX:18485957-18485997	ATCGTATACTATCTCACGCC
chrX_C4	CGATTACCCGATAGGACGAATCCTTTCAGCTTTAGGAGCCTATCTGGTGCAGGCCCTATGATCGTATACTATCTCACGCC	CGATTACCCGATAGGACGAA	TCCTTTCAGCTTTAGGAGCCTATCTGGTGCAGGCCCTATG	chrX:18486001-18486041	ATCGTATACTATCTCACGCC
chrX_C4	CGATTACCCGATAGGACGAAGCCTCAGTCTCTGTGGGTTCATATGTGTAGTGTGTAGTTTATCGTATACTATCTCACGCC	CGATTACCCGATAGGACGAA	GCCTCAGTCTCTGTGGGTTCATATGTGTAGTGTGTAGTTT	chrX:18486058-18486098	ATCGTATACTATCTCACGCC
chrX_C4	CGATTACCCGATAGGACGAAAAATTAACCCAGGCTAAATCTGACTATTTACTGGCATTGGATCGTATACTATCTCACGCC	CGATTACCCGATAGGACGAA	AAATTAACCCAGGCTAAATCTGACTATTTACTGGCATTGG	chrX:18486100-18486140	ATCGTATACTATCTCACGCC
chrX_C4	CGATTACCCGATAGGACGAAACCATGCCTGTCTCTAAGTGGCCATCTTGCTCTGGTTCCTATCGTATACTATCTCACGCC	CGATTACCCGATAGGACGAA	ACCATGCCTGTCTCTAAGTGGCCATCTTGCTCTGGTTCCT	chrX:18486142-18486182	ATCGTATACTATCTCACGCC
chrX_C4	CGATTACCCGATAGGACGAAGGCTAGCTTGCTAAGCTAACTAAACACTAAACCCATTTATATCGTATACTATCTCACGCC	CGATTACCCGATAGGACGAA	GGCTAGCTTGCTAAGCTAACTAAACACTAAACCCATTTAT	chrX:18486184-18486224	ATCGTATACTATCTCACGCC
chrX_C4	CGATTACCCGATAGGACGAATGGAATGGCTGGAGCTACTGCTCTCGTTTCTCAGGTCACCATCGTATACTATCTCACGCC	CGATTACCCGATAGGACGAA	TGGAATGGCTGGAGCTACTGCTCTCGTTTCTCAGGTCACC	chrX:18486226-18486266	ATCGTATACTATCTCACGCC
chrX_C4	CGATTACCCGATAGGACGAACCCCGTGTGGCTCGCTTGTAGAATGCCAGCTACTGCTCACATCGTATACTATCTCACGCC	CGATTACCCGATAGGACGAA	CCCCGTGTGGCTCGCTTGTAGAATGCCAGCTACTGCTCAC	chrX:18486268-18486308	ATCGTATACTATCTCACGCC
chrX_C4	CGATTACCCGATAGGACGAAAGCTCCTCTTAGACCCATGAACTGAAAACACTAGAGACTTATCGTATACTATCTCACGCC	CGATTACCCGATAGGACGAA	AGCTCCTCTTAGACCCATGAACTGAAAACACTAGAGACTT	chrX:18486310-18486350	ATCGTATACTATCTCACGCC
chrX_C4	CGATTACCCGATAGGACGAAACTCCAAAATGCCCATGCAAAGAAGACTCAATTCAATAATATCGTATACTATCTCACGCC	CGATTACCCGATAGGACGAA	ACTCCAAAATGCCCATGCAAAGAAGACTCAATTCAATAAT	chrX:18486387-18486427	ATCGTATACTATCTCACGCC
chrX_C4	CGATTACCCGATAGGACGAATGCCTATATTAGACAAATATACCATCTCACTACTCTATGGATCGTATACTATCTCACGCC	CGATTACCCGATAGGACGAA	TGCCTATATTAGACAAATATACCATCTCACTACTCTATGG	chrX:18486443-18486483	ATCGTATACTATCTCACGCC
chrX_C4	CGATTACCCGATAGGACGAAGTGGTTCTGCTCCATCTTCTTCTTCCTTCATTTTCCTCTCATCGTATACTATCTCACGCC	CGATTACCCGATAGGACGAA	GTGGTTCTGCTCCATCTTCTTCTTCCTTCATTTTCCTCTC	chrX:18486527-18486567	ATCGTATACTATCTCACGCC
chrX_C4	CGATTACCCGATAGGACGAATCTTTCCTCTGTCTTGTCTGACCTTGCTCTTCTCCTCCTCATCGTATACTATCTCACGCC	CGATTACCCGATAGGACGAA	TCTTTCCTCTGTCTTGTCTGACCTTGCTCTTCTCCTCCTC	chrX:18486569-18486609	ATCGTATACTATCTCACGCC
chrX_C4	CGATTACCCGATAGGACGAATTCCTGTTCTGCTTGGAAGATGCCACCTCCATATCTTCTCATCGTATACTATCTCACGCC	CGATTACCCGATAGGACGAA	TTCCTGTTCTGCTTGGAAGATGCCACCTCCATATCTTCTC	chrX:18486611-18486651	ATCGTATACTATCTCACGCC
chrX_C4	CGATTACCCGATAGGACGAAGGTTTCCTGTCATCTTTATCAGCCAATCAAATAATTAGGGATCGTATACTATCTCACGCC	CGATTACCCGATAGGACGAA	GGTTTCCTGTCATCTTTATCAGCCAATCAAATAATTAGGG	chrX:18486660-18486700	ATCGTATACTATCTCACGCC
chrX_C4	CGATTACCCGATAGGACGAAAGAAAAGCAATCTACCATCTATCTAACGTAAAAGGCTTACATCGTATACTATCTCACGCC	CGATTACCCGATAGGACGAA	AGAAAAGCAATCTACCATCTATCTAACGTAAAAGGCTTAC	chrX:18486833-18486873	ATCGTATACTATCTCACGCC
chrX_C4	CGATTACCCGATAGGACGAACCATCCTTTCAAATATAAATCATCTCTCAATGCTGAGAAGATCGTATACTATCTCACGCC	CGATTACCCGATAGGACGAA	CCATCCTTTCAAATATAAATCATCTCTCAATGCTGAGAAG	chrX:18486923-18486963	ATCGTATACTATCTCACGCC
chrX_C4	CGATTACCCGATAGGACGAATGGGTTGGTTAAAAGACTACAGTCAGTCTTCAACCCCTCCATCGTATACTATCTCACGCC	CGATTACCCGATAGGACGAA	TGGGTTGGTTAAAAGACTACAGTCAGTCTTCAACCCCTCC	chrX:18486965-18487005	ATCGTATACTATCTCACGCC
chrX_C4	CGATTACCCGATAGGACGAACTGAGAGTGACTCAAATATTACCTGAAAATTATAGGAAGCATCGTATACTATCTCACGCC	CGATTACCCGATAGGACGAA	CTGAGAGTGACTCAAATATTACCTGAAAATTATAGGAAGC	chrX:18487011-18487051	ATCGTATACTATCTCACGCC
chrX_C4	CGATTACCCGATAGGACGAAAGACAGCTGTCTACCTAGACAGCCCCTGATTCTCCAAAACATCGTATACTATCTCACGCC	CGATTACCCGATAGGACGAA	AGACAGCTGTCTACCTAGACAGCCCCTGATTCTCCAAAAC	chrX:18487086-18487126	ATCGTATACTATCTCACGCC
chrX_C4	CGATTACCCGATAGGACGAATGAAGCATCTGTCATCAGCCTTCTGGCAGAAGAACAGCTAATCGTATACTATCTCACGCC	CGATTACCCGATAGGACGAA	TGAAGCATCTGTCATCAGCCTTCTGGCAGAAGAACAGCTA	chrX:18487128-18487168	ATCGTATACTATCTCACGCC
chrX_C4	CGATTACCCGATAGGACGAATTTTAAAGGACTGCTCACCCTGTCTTGGCAAGGTCAACAGATCGTATACTATCTCACGCC	CGATTACCCGATAGGACGAA	TTTTAAAGGACTGCTCACCCTGTCTTGGCAAGGTCAACAG	chrX:18487199-18487239	ATCGTATACTATCTCACGCC
chrX_C4	CGATTACCCGATAGGACGAAAAGTGTCCTTTCCTGTACAGTATTGATCTGAAAATGAAACATCGTATACTATCTCACGCC	CGATTACCCGATAGGACGAA	AAGTGTCCTTTCCTGTACAGTATTGATCTGAAAATGAAAC	chrX:18487255-18487295	ATCGTATACTATCTCACGCC
chrX_C4	CGATTACCCGATAGGACGAAAAGAAAGGGGTTCTGTCGGGAGCAGATATGTCTCAACATTATCGTATACTATCTCACGCC	CGATTACCCGATAGGACGAA	AAGAAAGGGGTTCTGTCGGGAGCAGATATGTCTCAACATT	chrX:18487378-18487418	ATCGTATACTATCTCACGCC
chrX_C4	CGATTACCCGATAGGACGAAAAAAGAAAGGGGAAGAGCAAGGTCAGATGAGATGGAGGACATCGTATACTATCTCACGCC	CGATTACCCGATAGGACGAA	AAAAGAAAGGGGAAGAGCAAGGTCAGATGAGATGGAGGAC	chrX:18487505-18487545	ATCGTATACTATCTCACGCC
chrX_C4	CGATTACCCGATAGGACGAAGGAAGAAGAAGATGCAGGGAGAAGGAGATGAAAATGAACCATCGTATACTATCTCACGCC	CGATTACCCGATAGGACGAA	GGAAGAAGAAGATGCAGGGAGAAGGAGATGAAAATGAACC	chrX:18487548-18487588	ATCGTATACTATCTCACGCC
chrX_C4	CGATTACCCGATAGGACGAATTCATAGTGGGGCAATAGAGTAGTGAAGTAGTATATTTGTATCGTATACTATCTCACGCC	CGATTACCCGATAGGACGAA	TTCATAGTGGGGCAATAGAGTAGTGAAGTAGTATATTTGT	chrX:18487628-18487668	ATCGTATACTATCTCACGCC
chrX_C4	CGATTACCCGATAGGACGAATCTAAGCATGCAGCTTGTAGTTATATTATTGAGTTACCTGATCGTATACTATCTCACGCC	CGATTACCCGATAGGACGAA	TCTAAGCATGCAGCTTGTAGTTATATTATTGAGTTACCTG	chrX:18487672-18487712	ATCGTATACTATCTCACGCC
chrX_C4	CGATTACCCGATAGGACGAATGCATGGGTATTTTAGGGAGATTTACCATTACAAATCTGGATCGTATACTATCTCACGCC	CGATTACCCGATAGGACGAA	TGCATGGGTATTTTAGGGAGATTTACCATTACAAATCTGG	chrX:18487714-18487754	ATCGTATACTATCTCACGCC
chrX_C4	CGATTACCCGATAGGACGAATTATAAATCTATGGTGTTTTCATTTCACAGAGCTAAGGGGATCGTATACTATCTCACGCC	CGATTACCCGATAGGACGAA	TTATAAATCTATGGTGTTTTCATTTCACAGAGCTAAGGGG	chrX:18487762-18487802	ATCGTATACTATCTCACGCC
chrX_C4	CGATTACCCGATAGGACGAACTGAGTGAGAGATAACTGGCATTTTACAGACCAGCCAAAGATCGTATACTATCTCACGCC	CGATTACCCGATAGGACGAA	CTGAGTGAGAGATAACTGGCATTTTACAGACCAGCCAAAG	chrX:18487804-18487844	ATCGTATACTATCTCACGCC
chrX_C4	CGATTACCCGATAGGACGAAGGTGGATGGCCAGAGAAATGTCAGCGGCAGCTCCAGGCAAATCGTATACTATCTCACGCC	CGATTACCCGATAGGACGAA	GGTGGATGGCCAGAGAAATGTCAGCGGCAGCTCCAGGCAA	chrX:18487846-18487886	ATCGTATACTATCTCACGCC
chrX_C4	CGATTACCCGATAGGACGAACGGCCGCATAGGGCCAGCCATGGAGGTGGTTGAGACTACCATCGTATACTATCTCACGCC	CGATTACCCGATAGGACGAA	CGGCCGCATAGGGCCAGCCATGGAGGTGGTTGAGACTACC	chrX:18487888-18487928	ATCGTATACTATCTCACGCC
chrX_C4	CGATTACCCGATAGGACGAATAAAACTATATGCAACACATATGTGTATCAATCCTGGGAGATCGTATACTATCTCACGCC	CGATTACCCGATAGGACGAA	TAAAACTATATGCAACACATATGTGTATCAATCCTGGGAG	chrX:18487967-18488007	ATCGTATACTATCTCACGCC
chrX_C4	CGATTACCCGATAGGACGAATCTTTCATGACCCCTTTGAAGGGGCTGTTTGACTCCAAAAATCGTATACTATCTCACGCC	CGATTACCCGATAGGACGAA	TCTTTCATGACCCCTTTGAAGGGGCTGTTTGACTCCAAAA	chrX:18488153-18488193	ATCGTATACTATCTCACGCC
chrX_C4	CGATTACCCGATAGGACGAAGGTCATGATCCACAGCAGTGGAGAACCTCTGAGAAGGCATATCGTATACTATCTCACGCC	CGATTACCCGATAGGACGAA	GGTCATGATCCACAGCAGTGGAGAACCTCTGAGAAGGCAT	chrX:18488195-18488235	ATCGTATACTATCTCACGCC
chrX_C4	CGATTACCCGATAGGACGAAGTGTTCCAATGTATCTTACGTTCTGCATATTTTCAGGCTCATCGTATACTATCTCACGCC	CGATTACCCGATAGGACGAA	GTGTTCCAATGTATCTTACGTTCTGCATATTTTCAGGCTC	chrX:18488348-18488388	ATCGTATACTATCTCACGCC
chrX_C4	CGATTACCCGATAGGACGAATTCATTCCCATCTGCTGTAGGAGGAAGCTTCTGATGATGGATCGTATACTATCTCACGCC	CGATTACCCGATAGGACGAA	TTCATTCCCATCTGCTGTAGGAGGAAGCTTCTGATGATGG	chrX:18488394-18488434	ATCGTATACTATCTCACGCC
chrX_C4	CGATTACCCGATAGGACGAAATGTCATAGAGTGTGCCTTAAGTCAAGTCAGATATTCCCAATCGTATACTATCTCACGCC	CGATTACCCGATAGGACGAA	ATGTCATAGAGTGTGCCTTAAGTCAAGTCAGATATTCCCA	chrX:18488593-18488633	ATCGTATACTATCTCACGCC
chrX_C4	CGATTACCCGATAGGACGAAATCTTTGTGCCGCCATTGCTCTAGCACTGTAGGCAGGACAATCGTATACTATCTCACGCC	CGATTACCCGATAGGACGAA	ATCTTTGTGCCGCCATTGCTCTAGCACTGTAGGCAGGACA	chrX:18488635-18488675	ATCGTATACTATCTCACGCC
chrX_C4	CGATTACCCGATAGGACGAAATTGTAGATCAGAGTGTTTGTAGTTGAGTTGGCATCTCTTATCGTATACTATCTCACGCC	CGATTACCCGATAGGACGAA	ATTGTAGATCAGAGTGTTTGTAGTTGAGTTGGCATCTCTT	chrX:18488677-18488717	ATCGTATACTATCTCACGCC
chrX_C4	CGATTACCCGATAGGACGAATAATGAGAGACAGAAAGAGGTTGGAGATGGGTGGAATAGGATCGTATACTATCTCACGCC	CGATTACCCGATAGGACGAA	TAATGAGAGACAGAAAGAGGTTGGAGATGGGTGGAATAGG	chrX:18488839-18488879	ATCGTATACTATCTCACGCC
chrX_C4	CGATTACCCGATAGGACGAACTTAGTTGTTTCTAGCATTATTCAAGCTTTCAGTTTTCCCATCGTATACTATCTCACGCC	CGATTACCCGATAGGACGAA	CTTAGTTGTTTCTAGCATTATTCAAGCTTTCAGTTTTCCC	chrX:18489048-18489088	ATCGTATACTATCTCACGCC
chrX_C4	CGATTACCCGATAGGACGAAGCTGCTTCATCCTAAATAGGTTTGTCCCCAGGGGATCTCTATCGTATACTATCTCACGCC	CGATTACCCGATAGGACGAA	GCTGCTTCATCCTAAATAGGTTTGTCCCCAGGGGATCTCT	chrX:18489090-18489130	ATCGTATACTATCTCACGCC
chrX_C4	CGATTACCCGATAGGACGAAGTTGCCATAGGAACTATAAAATGTCTGGTATAAATGACAGATCGTATACTATCTCACGCC	CGATTACCCGATAGGACGAA	GTTGCCATAGGAACTATAAAATGTCTGGTATAAATGACAG	chrX:18489137-18489177	ATCGTATACTATCTCACGCC
chrX_C4	CGATTACCCGATAGGACGAATTTTACATTCCATATTTTATTTACGCCCCTCCCCTTTCACATCGTATACTATCTCACGCC	CGATTACCCGATAGGACGAA	TTTTACATTCCATATTTTATTTACGCCCCTCCCCTTTCAC	chrX:18489319-18489359	ATCGTATACTATCTCACGCC
chrX_C4	CGATTACCCGATAGGACGAAACCCGTACCCGACCATGTTCCACATTCCATACCTCCTCCCATCGTATACTATCTCACGCC	CGATTACCCGATAGGACGAA	ACCCGTACCCGACCATGTTCCACATTCCATACCTCCTCCC	chrX:18489361-18489401	ATCGTATACTATCTCACGCC
chrX_C4	CGATTACCCGATAGGACGAAGGATCAGCTGCTTCTGTCCATTGGTAGGGTCAGCTGCTTCATCGTATACTATCTCACGCC	CGATTACCCGATAGGACGAA	GGATCAGCTGCTTCTGTCCATTGGTAGGGTCAGCTGCTTC	chrX:18489690-18489730	ATCGTATACTATCTCACGCC
chrX_C4	CGATTACCCGATAGGACGAATTTTGTGAGCACTCCATAGCCTCATAGGCTATGGGACCACATCGTATACTATCTCACGCC	CGATTACCCGATAGGACGAA	TTTTGTGAGCACTCCATAGCCTCATAGGCTATGGGACCAC	chrX:18489815-18489855	ATCGTATACTATCTCACGCC
chrX_C4	CGATTACCCGATAGGACGAACCTATTTCCATTCTTTCTGCTGGCCCTCACCCAATACCAGATCGTATACTATCTCACGCC	CGATTACCCGATAGGACGAA	CCTATTTCCATTCTTTCTGCTGGCCCTCACCCAATACCAG	chrX:18490163-18490203	ATCGTATACTATCTCACGCC
chrX_C4	CGATTACCCGATAGGACGAATTCATGTCTAACATCCACTTATTAGGGCGTATATACTTGCATCGTATACTATCTCACGCC	CGATTACCCGATAGGACGAA	TTCATGTCTAACATCCACTTATTAGGGCGTATATACTTGC	chrX:18490429-18490469	ATCGTATACTATCTCACGCC
chrX_C4	CGATTACCCGATAGGACGAATTGTGTAAATGAACCACATTTTCCATTCTTCTGTCATGGGATCGTATACTATCTCACGCC	CGATTACCCGATAGGACGAA	TTGTGTAAATGAACCACATTTTCCATTCTTCTGTCATGGG	chrX:18490578-18490618	ATCGTATACTATCTCACGCC
chrX_C4	CGATTACCCGATAGGACGAACCACAGTGGTTGTACCAGTCTGCAATTTCCACATCCTTTCATCGTATACTATCTCACGCC	CGATTACCCGATAGGACGAA	CCACAGTGGTTGTACCAGTCTGCAATTTCCACATCCTTTC	chrX:18490792-18490832	ATCGTATACTATCTCACGCC
chrX_C4	CGATTACCCGATAGGACGAATTGGGTTGTTGGTGGTTAGCTTCTTGAGTTCTAAGCCCTCATCGTATACTATCTCACGCC	CGATTACCCGATAGGACGAA	TTGGGTTGTTGGTGGTTAGCTTCTTGAGTTCTAAGCCCTC	chrX:18491028-18491068	ATCGTATACTATCTCACGCC
chrX_C4	CGATTACCCGATAGGACGAAAAATGAAGGCTACTGATTTAAAAGTATTGGAGAGATCAGGATCGTATACTATCTCACGCC	CGATTACCCGATAGGACGAA	AAATGAAGGCTACTGATTTAAAAGTATTGGAGAGATCAGG	chrX:18492003-18492043	ATCGTATACTATCTCACGCC
chrX_C4	CGATTACCCGATAGGACGAATTTTGTATCCATTCCAATCACAGCCCTCCTCCCTCCTCTCATCGTATACTATCTCACGCC	CGATTACCCGATAGGACGAA	TTTTGTATCCATTCCAATCACAGCCCTCCTCCCTCCTCTC	chrX:18492424-18492464	ATCGTATACTATCTCACGCC
chrX_C4	CGATTACCCGATAGGACGAATCCCATCCCACCCTTACAAACCCCTTCCCCTATTGCTCCTATCGTATACTATCTCACGCC	CGATTACCCGATAGGACGAA	TCCCATCCCACCCTTACAAACCCCTTCCCCTATTGCTCCT	chrX:18492466-18492506	ATCGTATACTATCTCACGCC
chrX_C4	CGATTACCCGATAGGACGAACCCCACTTTTGCTACCACCCCATCCTGGATGTCTAGTCCCATCGTATACTATCTCACGCC	CGATTACCCGATAGGACGAA	CCCCACTTTTGCTACCACCCCATCCTGGATGTCTAGTCCC	chrX:18492535-18492575	ATCGTATACTATCTCACGCC
chrX_C4	CGATTACCCGATAGGACGAAGCAGTCCAGGTAAGGGGAGGGGATCCAGTGGCAAGATCAGATCGTATACTATCTCACGCC	CGATTACCCGATAGGACGAA	GCAGTCCAGGTAAGGGGAGGGGATCCAGTGGCAAGATCAG	chrX:18492616-18492656	ATCGTATACTATCTCACGCC
chrX_C4	CGATTACCCGATAGGACGAAACAACCCCTGCTTCACTGTTAGGGATATCTACATAAGTACATCGTATACTATCTCACGCC	CGATTACCCGATAGGACGAA	ACAACCCCTGCTTCACTGTTAGGGATATCTACATAAGTAC	chrX:18492658-18492698	ATCGTATACTATCTCACGCC
chrX_C4	CGATTACCCGATAGGACGAAGCTGCACATTCCTACATACGTGTCTAGGTCAAGCCCTTGCATCGTATACTATCTCACGCC	CGATTACCCGATAGGACGAA	GCTGCACATTCCTACATACGTGTCTAGGTCAAGCCCTTGC	chrX:18492700-18492740	ATCGTATACTATCTCACGCC
chrX_C4	CGATTACCCGATAGGACGAACATGATCCCAGGTTAGTCAACTCTGTGAGTCTTCTTTATTATCGTATACTATCTCACGCC	CGATTACCCGATAGGACGAA	CATGATCCCAGGTTAGTCAACTCTGTGAGTCTTCTTTATT	chrX:18492777-18492817	ATCGTATACTATCTCACGCC
chrX_C4	CGATTACCCGATAGGACGAATCCAGCTCGCTCACTTTTGTTCCCTACTCTTCCACAACCAATCGTATACTATCTCACGCC	CGATTACCCGATAGGACGAA	TCCAGCTCGCTCACTTTTGTTCCCTACTCTTCCACAACCA	chrX:18492829-18492869	ATCGTATACTATCTCACGCC
chrX_C4	CGATTACCCGATAGGACGAATGTATTAAAGAACATTCTTAGCAGTGATGATCTTTCTCCCATCGTATACTATCTCACGCC	CGATTACCCGATAGGACGAA	TGTATTAAAGAACATTCTTAGCAGTGATGATCTTTCTCCC	chrX:18492976-18493016	ATCGTATACTATCTCACGCC
chrX_C4	CGATTACCCGATAGGACGAACCCCTCCTCTCCTCTCCTTAATTTTCTTTTCTTGAGACAGATCGTATACTATCTCACGCC	CGATTACCCGATAGGACGAA	CCCCTCCTCTCCTCTCCTTAATTTTCTTTTCTTGAGACAG	chrX:18493173-18493213	ATCGTATACTATCTCACGCC
chrX_C4	CGATTACCCGATAGGACGAACCTCATGGTGTAGCCCTTATTTGTAGACCAGATTGGCCTCATCGTATACTATCTCACGCC	CGATTACCCGATAGGACGAA	CCTCATGGTGTAGCCCTTATTTGTAGACCAGATTGGCCTC	chrX:18493215-18493255	ATCGTATACTATCTCACGCC
chrX_C4	CGATTACCCGATAGGACGAACCTTCTGAGGGCTGGAGTCAAAGGTGTGTGTCAAGCTTCTATCGTATACTATCTCACGCC	CGATTACCCGATAGGACGAA	CCTTCTGAGGGCTGGAGTCAAAGGTGTGTGTCAAGCTTCT	chrX:18493282-18493322	ATCGTATACTATCTCACGCC
chrX_C4	CGATTACCCGATAGGACGAATTTTCTTGAAGACTTGTCATACACTTTAGATGTGGCTGTGATCGTATACTATCTCACGCC	CGATTACCCGATAGGACGAA	TTTTCTTGAAGACTTGTCATACACTTTAGATGTGGCTGTG	chrX:18493379-18493419	ATCGTATACTATCTCACGCC
chrX_C4	CGATTACCCGATAGGACGAAAAGTTGACCATTTTGTTTACCACGTGGGCTATGGGGATCATCGGTCAGAGCATTGACGAC	CGATTACCCGATAGGACGAA	AAGTTGACCATTTTGTTTACCACGTGGGCTATGGGGATCA	chrX:19495831-19495871	TCGGTCAGAGCATTGACGAC
chrX_C4	CGATTACCCGATAGGACGAAGGTTGGTAGGCTCAAAAGCAAATACCTTTACTTTGAGCCTTCGGTCAGAGCATTGACGAC	CGATTACCCGATAGGACGAA	GGTTGGTAGGCTCAAAAGCAAATACCTTTACTTTGAGCCT	chrX:19495877-19495917	TCGGTCAGAGCATTGACGAC
chrX_C4	CGATTACCCGATAGGACGAAAGAGAGAGCAGTACACATAAATGTACATGCAAATACAACATCGGTCAGAGCATTGACGAC	CGATTACCCGATAGGACGAA	AGAGAGAGCAGTACACATAAATGTACATGCAAATACAACA	chrX:19495998-19496038	TCGGTCAGAGCATTGACGAC
chrX_C4	CGATTACCCGATAGGACGAATGCTGAGTCATCTTGCTGGTCCCTTTATAACCTGTGATGTTCGGTCAGAGCATTGACGAC	CGATTACCCGATAGGACGAA	TGCTGAGTCATCTTGCTGGTCCCTTTATAACCTGTGATGT	chrX:19496143-19496183	TCGGTCAGAGCATTGACGAC
chrX_C4	CGATTACCCGATAGGACGAAATCATTTTAAGTTAGGAGACGTACCCTAGATCTAGACAATTCGGTCAGAGCATTGACGAC	CGATTACCCGATAGGACGAA	ATCATTTTAAGTTAGGAGACGTACCCTAGATCTAGACAAT	chrX:19496269-19496309	TCGGTCAGAGCATTGACGAC
chrX_C4	CGATTACCCGATAGGACGAACTCCCCTACCCACCCACTCCCACTTTGAGCCTACTTTTATTCGGTCAGAGCATTGACGAC	CGATTACCCGATAGGACGAA	CTCCCCTACCCACCCACTCCCACTTTGAGCCTACTTTTAT	chrX:19496542-19496582	TCGGTCAGAGCATTGACGAC
chrX_C4	CGATTACCCGATAGGACGAATTCATATCCAGCCATTGTTGGATTAGCCTGATACACACACTCGGTCAGAGCATTGACGAC	CGATTACCCGATAGGACGAA	TTCATATCCAGCCATTGTTGGATTAGCCTGATACACACAC	chrX:19496638-19496678	TCGGTCAGAGCATTGACGAC
chrX_C4	CGATTACCCGATAGGACGAAAGAGAGAGAGAGAATGGTCATGGCATTCATCAGAGCAACATCGGTCAGAGCATTGACGAC	CGATTACCCGATAGGACGAA	AGAGAGAGAGAGAATGGTCATGGCATTCATCAGAGCAACA	chrX:19496748-19496788	TCGGTCAGAGCATTGACGAC
chrX_C4	CGATTACCCGATAGGACGAAATGTAAGTTTGACAATTCCATACTTAAACACAGCTTACCCTCGGTCAGAGCATTGACGAC	CGATTACCCGATAGGACGAA	ATGTAAGTTTGACAATTCCATACTTAAACACAGCTTACCC	chrX:19496890-19496930	TCGGTCAGAGCATTGACGAC
chrX_C4	CGATTACCCGATAGGACGAAGGTATCACTGCACAGATATACTCAAGAGACAGTTACTGGCTCGGTCAGAGCATTGACGAC	CGATTACCCGATAGGACGAA	GGTATCACTGCACAGATATACTCAAGAGACAGTTACTGGC	chrX:19496932-19496972	TCGGTCAGAGCATTGACGAC
chrX_C4	CGATTACCCGATAGGACGAATCTGAACAATTATAATGCATACTGGTATCCTCTATGGAACTCGGTCAGAGCATTGACGAC	CGATTACCCGATAGGACGAA	TCTGAACAATTATAATGCATACTGGTATCCTCTATGGAAC	chrX:19496975-19497015	TCGGTCAGAGCATTGACGAC
chrX_C4	CGATTACCCGATAGGACGAATTTGTGAGTATTAAACTACTAGCAGAAGCTGTTAACAGTGTCGGTCAGAGCATTGACGAC	CGATTACCCGATAGGACGAA	TTTGTGAGTATTAAACTACTAGCAGAAGCTGTTAACAGTG	chrX:19497046-19497086	TCGGTCAGAGCATTGACGAC
chrX_C4	CGATTACCCGATAGGACGAATTTTACATGCCATTGAGCTGTAGATTGCAAAGGCCTCTGATCGGTCAGAGCATTGACGAC	CGATTACCCGATAGGACGAA	TTTTACATGCCATTGAGCTGTAGATTGCAAAGGCCTCTGA	chrX:19497091-19497131	TCGGTCAGAGCATTGACGAC
chrX_C4	CGATTACCCGATAGGACGAACCCTACTGTTCTCCCACATTTACCTCCTTTGAGCACATCTTCGGTCAGAGCATTGACGAC	CGATTACCCGATAGGACGAA	CCCTACTGTTCTCCCACATTTACCTCCTTTGAGCACATCT	chrX:19497133-19497173	TCGGTCAGAGCATTGACGAC
chrX_C4	CGATTACCCGATAGGACGAAGAGCTCCAACTATCTAATGTGCCCTGGATTTCTTTCACTTTCGGTCAGAGCATTGACGAC	CGATTACCCGATAGGACGAA	GAGCTCCAACTATCTAATGTGCCCTGGATTTCTTTCACTT	chrX:19497175-19497215	TCGGTCAGAGCATTGACGAC
chrX_C4	CGATTACCCGATAGGACGAAGCATAAATTCCTAATCCAGAGCTAAATACTTCTAAGATGCTCGGTCAGAGCATTGACGAC	CGATTACCCGATAGGACGAA	GCATAAATTCCTAATCCAGAGCTAAATACTTCTAAGATGC	chrX:19497299-19497339	TCGGTCAGAGCATTGACGAC
chrX_C4	CGATTACCCGATAGGACGAAATCTTTATAGCAATTAGTACCTCTTTAAGGTGAGGAAGTCTCGGTCAGAGCATTGACGAC	CGATTACCCGATAGGACGAA	ATCTTTATAGCAATTAGTACCTCTTTAAGGTGAGGAAGTC	chrX:19497341-19497381	TCGGTCAGAGCATTGACGAC
chrX_C4	CGATTACCCGATAGGACGAACCTTTTCTCCTTCCTTTCCTTTCTAAGAAATAACTGCTATTCGGTCAGAGCATTGACGAC	CGATTACCCGATAGGACGAA	CCTTTTCTCCTTCCTTTCCTTTCTAAGAAATAACTGCTAT	chrX:19497411-19497451	TCGGTCAGAGCATTGACGAC
chrX_C4	CGATTACCCGATAGGACGAAAAAAGTCTCCTAACAACCTACACCCAGTTTTCCCTAGCACTCGGTCAGAGCATTGACGAC	CGATTACCCGATAGGACGAA	AAAAGTCTCCTAACAACCTACACCCAGTTTTCCCTAGCAC	chrX:19497545-19497585	TCGGTCAGAGCATTGACGAC
chrX_C4	CGATTACCCGATAGGACGAAAATTCAGATTCCTTTTAGCTTTTCCCTAATTCCCTTTTCCTCGGTCAGAGCATTGACGAC	CGATTACCCGATAGGACGAA	AATTCAGATTCCTTTTAGCTTTTCCCTAATTCCCTTTTCC	chrX:19497677-19497717	TCGGTCAGAGCATTGACGAC
chrX_C4	CGATTACCCGATAGGACGAATTCCAATATTCATCCATGACACTTAAACAGTCCTTAGGTCTCGGTCAGAGCATTGACGAC	CGATTACCCGATAGGACGAA	TTCCAATATTCATCCATGACACTTAAACAGTCCTTAGGTC	chrX:19497719-19497759	TCGGTCAGAGCATTGACGAC
chrX_C4	CGATTACCCGATAGGACGAATTTAGACTGTGATTGGCAGGGCAGTTCCTCAGATTTGTTTTCGGTCAGAGCATTGACGAC	CGATTACCCGATAGGACGAA	TTTAGACTGTGATTGGCAGGGCAGTTCCTCAGATTTGTTT	chrX:19497761-19497801	TCGGTCAGAGCATTGACGAC
chrX_C4	CGATTACCCGATAGGACGAATATTCAACAATTGAATTCTAGCCACTGTTGCTTTCATGACTCGGTCAGAGCATTGACGAC	CGATTACCCGATAGGACGAA	TATTCAACAATTGAATTCTAGCCACTGTTGCTTTCATGAC	chrX:19497853-19497893	TCGGTCAGAGCATTGACGAC
chrX_C4	CGATTACCCGATAGGACGAATAGAATTTAGGGGAATAAAGTACACTGTGGTATGATGAACTCGGTCAGAGCATTGACGAC	CGATTACCCGATAGGACGAA	TAGAATTTAGGGGAATAAAGTACACTGTGGTATGATGAAC	chrX:19497906-19497946	TCGGTCAGAGCATTGACGAC
chrX_C4	CGATTACCCGATAGGACGAACAGGTTGTAGTAGTATTTGTTACCTTTCTCAGTGTTTATCTCGGTCAGAGCATTGACGAC	CGATTACCCGATAGGACGAA	CAGGTTGTAGTAGTATTTGTTACCTTTCTCAGTGTTTATC	chrX:19497966-19498006	TCGGTCAGAGCATTGACGAC
chrX_C4	CGATTACCCGATAGGACGAACCTTCTCTGAGTGGTACACCTTGGAAGCAATTTTGTAACTTCGGTCAGAGCATTGACGAC	CGATTACCCGATAGGACGAA	CCTTCTCTGAGTGGTACACCTTGGAAGCAATTTTGTAACT	chrX:19498008-19498048	TCGGTCAGAGCATTGACGAC
chrX_C4	CGATTACCCGATAGGACGAAAAGTCATACTGATGGAATAAATAGTCAAACTCTACCACTGTCGGTCAGAGCATTGACGAC	CGATTACCCGATAGGACGAA	AAGTCATACTGATGGAATAAATAGTCAAACTCTACCACTG	chrX:19498050-19498090	TCGGTCAGAGCATTGACGAC
chrX_C4	CGATTACCCGATAGGACGAAGGGAGTGTCTACATAAACTATTTGGACTTCTTCAGTCCAGTCGGTCAGAGCATTGACGAC	CGATTACCCGATAGGACGAA	GGGAGTGTCTACATAAACTATTTGGACTTCTTCAGTCCAG	chrX:19498092-19498132	TCGGTCAGAGCATTGACGAC
chrX_C4	CGATTACCCGATAGGACGAAATACTGCTTCATTCATTTCCTTGCTCAGTTGTTCTAGGCTTCGGTCAGAGCATTGACGAC	CGATTACCCGATAGGACGAA	ATACTGCTTCATTCATTTCCTTGCTCAGTTGTTCTAGGCT	chrX:19498224-19498264	TCGGTCAGAGCATTGACGAC
chrX_C4	CGATTACCCGATAGGACGAAAACTTTCAAAGACTTTCAAAGTCAATCAACACAGGAAAGGTCGGTCAGAGCATTGACGAC	CGATTACCCGATAGGACGAA	AACTTTCAAAGACTTTCAAAGTCAATCAACACAGGAAAGG	chrX:19498372-19498412	TCGGTCAGAGCATTGACGAC
chrX_C4	CGATTACCCGATAGGACGAATGGTGGAGCAACTCACATAGTAGTGATCAAGAATAAAAGATCGGTCAGAGCATTGACGAC	CGATTACCCGATAGGACGAA	TGGTGGAGCAACTCACATAGTAGTGATCAAGAATAAAAGA	chrX:19498414-19498454	TCGGTCAGAGCATTGACGAC
chrX_C4	CGATTACCCGATAGGACGAATTTTCCTTTTATCCCATCAAACTCCCCAGCCTTTCTCCCCTCGGTCAGAGCATTGACGAC	CGATTACCCGATAGGACGAA	TTTTCCTTTTATCCCATCAAACTCCCCAGCCTTTCTCCCC	chrX:19498486-19498526	TCGGTCAGAGCATTGACGAC
chrX_C4	CGATTACCCGATAGGACGAAGTTCAGAGTTCTGTATGAAAGTACCCACACAAATTGACTCTCGGTCAGAGCATTGACGAC	CGATTACCCGATAGGACGAA	GTTCAGAGTTCTGTATGAAAGTACCCACACAAATTGACTC	chrX:19498528-19498568	TCGGTCAGAGCATTGACGAC
chrX_C4	CGATTACCCGATAGGACGAACATTCCTAGGACTTTATTAAAATGAACTGAAAGCCAGGGCTCGGTCAGAGCATTGACGAC	CGATTACCCGATAGGACGAA	CATTCCTAGGACTTTATTAAAATGAACTGAAAGCCAGGGC	chrX:19498581-19498621	TCGGTCAGAGCATTGACGAC
chrX_C4	CGATTACCCGATAGGACGAATATCATGTTTGATTGGTTTGTTAGCCCTCATTTACCTTTCTCGGTCAGAGCATTGACGAC	CGATTACCCGATAGGACGAA	TATCATGTTTGATTGGTTTGTTAGCCCTCATTTACCTTTC	chrX:19498625-19498665	TCGGTCAGAGCATTGACGAC
chrX_C4	CGATTACCCGATAGGACGAAGAGCCACAAGATCTTCTGGACTCATTTCTGCTCCAGTCCCTCGGTCAGAGCATTGACGAC	CGATTACCCGATAGGACGAA	GAGCCACAAGATCTTCTGGACTCATTTCTGCTCCAGTCCC	chrX:19498667-19498707	TCGGTCAGAGCATTGACGAC
chrX_C4	CGATTACCCGATAGGACGAAAACATTTCTTCAAGCTCCTAGTTCCTTTTATTAGAGAACCTCGGTCAGAGCATTGACGAC	CGATTACCCGATAGGACGAA	AACATTTCTTCAAGCTCCTAGTTCCTTTTATTAGAGAACC	chrX:19498714-19498754	TCGGTCAGAGCATTGACGAC
chrX_C4	CGATTACCCGATAGGACGAATGACAACTAGATATAGTCATTGCTACTATAATGCCATTGCTCGGTCAGAGCATTGACGAC	CGATTACCCGATAGGACGAA	TGACAACTAGATATAGTCATTGCTACTATAATGCCATTGC	chrX:19499002-19499042	TCGGTCAGAGCATTGACGAC
chrX_C4	CGATTACCCGATAGGACGAATGCTCTCCCTTCTAATTTGACAGAACAGGAAGACACACACTCGGTCAGAGCATTGACGAC	CGATTACCCGATAGGACGAA	TGCTCTCCCTTCTAATTTGACAGAACAGGAAGACACACAC	chrX:19499044-19499084	TCGGTCAGAGCATTGACGAC
chrX_C4	CGATTACCCGATAGGACGAAGTGAATGGAACCACTTCTAGTCTGGATCTTTAAAGTACTTTCGGTCAGAGCATTGACGAC	CGATTACCCGATAGGACGAA	GTGAATGGAACCACTTCTAGTCTGGATCTTTAAAGTACTT	chrX:19499238-19499278	TCGGTCAGAGCATTGACGAC
chrX_C4	CGATTACCCGATAGGACGAATTGCCTGATTGTCCTCCCCTTGCTAACAAGGAAATATAGCTCGGTCAGAGCATTGACGAC	CGATTACCCGATAGGACGAA	TTGCCTGATTGTCCTCCCCTTGCTAACAAGGAAATATAGC	chrX:19499355-19499395	TCGGTCAGAGCATTGACGAC
chrX_C4	CGATTACCCGATAGGACGAATTTATGAACTCAACAACTACTGGAATCTTAGACTTTGTGCTCGGTCAGAGCATTGACGAC	CGATTACCCGATAGGACGAA	TTTATGAACTCAACAACTACTGGAATCTTAGACTTTGTGC	chrX:19499446-19499486	TCGGTCAGAGCATTGACGAC
chrX_C4	CGATTACCCGATAGGACGAAGTTCTGTTACTCAAGAAAACCCTGGGTATAAGCATAGTATTCGGTCAGAGCATTGACGAC	CGATTACCCGATAGGACGAA	GTTCTGTTACTCAAGAAAACCCTGGGTATAAGCATAGTAT	chrX:19499702-19499742	TCGGTCAGAGCATTGACGAC
chrX_C4	CGATTACCCGATAGGACGAACCAACTCTTCACAGCTGTATTAAGTTATATGTGCTCATCTTCGGTCAGAGCATTGACGAC	CGATTACCCGATAGGACGAA	CCAACTCTTCACAGCTGTATTAAGTTATATGTGCTCATCT	chrX:19499744-19499784	TCGGTCAGAGCATTGACGAC
chrX_C4	CGATTACCCGATAGGACGAATATCCATCACCACATGGATCATTCTATCCAATTTTCCTTGTCGGTCAGAGCATTGACGAC	CGATTACCCGATAGGACGAA	TATCCATCACCACATGGATCATTCTATCCAATTTTCCTTG	chrX:19499786-19499826	TCGGTCAGAGCATTGACGAC
chrX_C4	CGATTACCCGATAGGACGAATATTTATAATCCCCTTTTCCAACAGTGAGAAACTAAGCTCTCGGTCAGAGCATTGACGAC	CGATTACCCGATAGGACGAA	TATTTATAATCCCCTTTTCCAACAGTGAGAAACTAAGCTC	chrX:19499828-19499868	TCGGTCAGAGCATTGACGAC
chrX_C4	CGATTACCCGATAGGACGAACATATGCATATATCGTGATCTCAGAATTATCATCCTGTTCTCGGTCAGAGCATTGACGAC	CGATTACCCGATAGGACGAA	CATATGCATATATCGTGATCTCAGAATTATCATCCTGTTC	chrX:19499905-19499945	TCGGTCAGAGCATTGACGAC
chrX_C4	CGATTACCCGATAGGACGAACCTGGGGTAGAGGAAACCAATGAATAAGAGAATAGTTCCTTCGGTCAGAGCATTGACGAC	CGATTACCCGATAGGACGAA	CCTGGGGTAGAGGAAACCAATGAATAAGAGAATAGTTCCT	chrX:19499947-19499987	TCGGTCAGAGCATTGACGAC
chrX_C4	CGATTACCCGATAGGACGAAGACAGAGAATTCTCTCATTTTCAGAATTACATAGGTCAGTTCGGTCAGAGCATTGACGAC	CGATTACCCGATAGGACGAA	GACAGAGAATTCTCTCATTTTCAGAATTACATAGGTCAGT	chrX:19499996-19500036	TCGGTCAGAGCATTGACGAC
chrX_C4	CGATTACCCGATAGGACGAACTTGTTCCTCTCCTCCATTCAATGAAGTTACTTTATTCATTCGGTCAGAGCATTGACGAC	CGATTACCCGATAGGACGAA	CTTGTTCCTCTCCTCCATTCAATGAAGTTACTTTATTCAT	chrX:19500038-19500078	TCGGTCAGAGCATTGACGAC
chrX_C4	CGATTACCCGATAGGACGAAGACTATAATGGTGTGTGGTACTTAACAAATGCTTATTGTCTCGGTCAGAGCATTGACGAC	CGATTACCCGATAGGACGAA	GACTATAATGGTGTGTGGTACTTAACAAATGCTTATTGTC	chrX:19500177-19500217	TCGGTCAGAGCATTGACGAC
chrX_C4	CGATTACCCGATAGGACGAATGTGGTCACACACAATAATTTTACTAACACAAGCAATCTCTCGGTCAGAGCATTGACGAC	CGATTACCCGATAGGACGAA	TGTGGTCACACACAATAATTTTACTAACACAAGCAATCTC	chrX:19500230-19500270	TCGGTCAGAGCATTGACGAC
chrX_C4	CGATTACCCGATAGGACGAAATAATCCCTGTTGGAACCTCAAAATATCTAACAACTACTGTCGGTCAGAGCATTGACGAC	CGATTACCCGATAGGACGAA	ATAATCCCTGTTGGAACCTCAAAATATCTAACAACTACTG	chrX:19500286-19500326	TCGGTCAGAGCATTGACGAC
chrX_C4	CGATTACCCGATAGGACGAATTTTAGATATTTGGCACCCATTTGTGGGAGAAATTTGGAATCGGTCAGAGCATTGACGAC	CGATTACCCGATAGGACGAA	TTTTAGATATTTGGCACCCATTTGTGGGAGAAATTTGGAA	chrX:19500609-19500649	TCGGTCAGAGCATTGACGAC
chrX_C4	CGATTACCCGATAGGACGAATGAGATTTAGGCTAGAGACACTCTAAAATGATTTAACCTCTCGGTCAGAGCATTGACGAC	CGATTACCCGATAGGACGAA	TGAGATTTAGGCTAGAGACACTCTAAAATGATTTAACCTC	chrX:19500654-19500694	TCGGTCAGAGCATTGACGAC
chrX_C4	CGATTACCCGATAGGACGAATCTAATAAGAACTCAGAAGACCAGAATGTAGATAGGGATGTCGGTCAGAGCATTGACGAC	CGATTACCCGATAGGACGAA	TCTAATAAGAACTCAGAAGACCAGAATGTAGATAGGGATG	chrX:19500709-19500749	TCGGTCAGAGCATTGACGAC
chrX_C4	CGATTACCCGATAGGACGAATCCATTCTGGCAAACAAATTTCCTATATTTTGTTGTGCTCTCGGTCAGAGCATTGACGAC	CGATTACCCGATAGGACGAA	TCCATTCTGGCAAACAAATTTCCTATATTTTGTTGTGCTC	chrX:19500827-19500867	TCGGTCAGAGCATTGACGAC
chrX_C4	CGATTACCCGATAGGACGAAAGACAGTTGGTGTCTAAGTTCAAGGGTCATAGACTTATCATCGGTCAGAGCATTGACGAC	CGATTACCCGATAGGACGAA	AGACAGTTGGTGTCTAAGTTCAAGGGTCATAGACTTATCA	chrX:19500869-19500909	TCGGTCAGAGCATTGACGAC
chrX_C4	CGATTACCCGATAGGACGAACTGTCTGAGGACATTTTGAAGCAGTCAAGTATTTAGGCTGTCGGTCAGAGCATTGACGAC	CGATTACCCGATAGGACGAA	CTGTCTGAGGACATTTTGAAGCAGTCAAGTATTTAGGCTG	chrX:19500911-19500951	TCGGTCAGAGCATTGACGAC
chrX_C4	CGATTACCCGATAGGACGAATTAAGCTGTTAGAGGCTGTGATGAGTATTACTGACTACTCTCGGTCAGAGCATTGACGAC	CGATTACCCGATAGGACGAA	TTAAGCTGTTAGAGGCTGTGATGAGTATTACTGACTACTC	chrX:19500953-19500993	TCGGTCAGAGCATTGACGAC
chrX_C4	CGATTACCCGATAGGACGAAAGCCAAGTTTACAGTGAGAGCTGGCATCAGAAATCATGGCTCGGTCAGAGCATTGACGAC	CGATTACCCGATAGGACGAA	AGCCAAGTTTACAGTGAGAGCTGGCATCAGAAATCATGGC	chrX:19500995-19501035	TCGGTCAGAGCATTGACGAC
chrX_C4	CGATTACCCGATAGGACGAAAAAACAAAAGCAGTAGGAAGTTGGGGCTAATGTATTCATATCGGTCAGAGCATTGACGAC	CGATTACCCGATAGGACGAA	AAAACAAAAGCAGTAGGAAGTTGGGGCTAATGTATTCATA	chrX:19501069-19501109	TCGGTCAGAGCATTGACGAC
chrX_C4	CGATTACCCGATAGGACGAAATTAACACCAGTAAGTGAACTAAGTACTTTGTATAGGGACTCGGTCAGAGCATTGACGAC	CGATTACCCGATAGGACGAA	ATTAACACCAGTAAGTGAACTAAGTACTTTGTATAGGGAC	chrX:19501121-19501161	TCGGTCAGAGCATTGACGAC
chrX_C4	CGATTACCCGATAGGACGAAAAAATGTCTTTGGGGCATCCTAGACATTCACCAGATACTTTCGGTCAGAGCATTGACGAC	CGATTACCCGATAGGACGAA	AAAATGTCTTTGGGGCATCCTAGACATTCACCAGATACTT	chrX:19501167-19501207	TCGGTCAGAGCATTGACGAC
chrX_C4	CGATTACCCGATAGGACGAACTCACCACTGTCTATCTGAGTTAAAGTTTCTATTGCTGTGTCGGTCAGAGCATTGACGAC	CGATTACCCGATAGGACGAA	CTCACCACTGTCTATCTGAGTTAAAGTTTCTATTGCTGTG	chrX:19501211-19501251	TCGGTCAGAGCATTGACGAC
chrX_C4	CGATTACCCGATAGGACGAAGGGACCTGGAGGCAAGAATTGATGAGTGTAGGGCAGGAAGTCGGTCAGAGCATTGACGAC	CGATTACCCGATAGGACGAA	GGGACCTGGAGGCAAGAATTGATGAGTGTAGGGCAGGAAG	chrX:19501351-19501391	TCGGTCAGAGCATTGACGAC
chrX_C4	CGATTACCCGATAGGACGAACTTATGACACCCAGGGCCAGCATGTCAAAGGTGTCACTCATCGGTCAGAGCATTGACGAC	CGATTACCCGATAGGACGAA	CTTATGACACCCAGGGCCAGCATGTCAAAGGTGTCACTCA	chrX:19501467-19501507	TCGGTCAGAGCATTGACGAC
chrX_C4	CGATTACCCGATAGGACGAACCCTCCAAAGCAACAATCAAGGAAATACACCATAATCTTCTCGGTCAGAGCATTGACGAC	CGATTACCCGATAGGACGAA	CCCTCCAAAGCAACAATCAAGGAAATACACCATAATCTTC	chrX:19501521-19501561	TCGGTCAGAGCATTGACGAC
chrX_C4	CGATTACCCGATAGGACGAAGTACTTAAGTTGATATTAAACTCTTCAGCACAAGTGACTCTCGGTCAGAGCATTGACGAC	CGATTACCCGATAGGACGAA	GTACTTAAGTTGATATTAAACTCTTCAGCACAAGTGACTC	chrX:19501628-19501668	TCGGTCAGAGCATTGACGAC
chrX_C4	CGATTACCCGATAGGACGAATCAACTTGATAGATCACTATTCACCTGTAACATTTCCTCATCGGTCAGAGCATTGACGAC	CGATTACCCGATAGGACGAA	TCAACTTGATAGATCACTATTCACCTGTAACATTTCCTCA	chrX:19501672-19501712	TCGGTCAGAGCATTGACGAC
chrX_C4	CGATTACCCGATAGGACGAAAAACTATTCCAGTCTCTTTGAAGTATCTAAAACCTCACTGTCGGTCAGAGCATTGACGAC	CGATTACCCGATAGGACGAA	AAACTATTCCAGTCTCTTTGAAGTATCTAAAACCTCACTG	chrX:19501844-19501884	TCGGTCAGAGCATTGACGAC
chrX_C4	CGATTACCCGATAGGACGAATGGCACAATCACAAATCAAATCAAACCCAAAATTCATCAGTCGGTCAGAGCATTGACGAC	CGATTACCCGATAGGACGAA	TGGCACAATCACAAATCAAATCAAACCCAAAATTCATCAG	chrX:19501964-19502004	TCGGTCAGAGCATTGACGAC
chrX_C4	CGATTACCCGATAGGACGAAATGTCAGACATTTGGAATTCTCTCACAATCTGCTGGAGTCTCGGTCAGAGCATTGACGAC	CGATTACCCGATAGGACGAA	ATGTCAGACATTTGGAATTCTCTCACAATCTGCTGGAGTC	chrX:19502017-19502057	TCGGTCAGAGCATTGACGAC
chrX_C4	CGATTACCCGATAGGACGAAGATTTCTGCATAGTTGTTGTCTCATTTTAACCCACTTATCTCGGTCAGAGCATTGACGAC	CGATTACCCGATAGGACGAA	GATTTCTGCATAGTTGTTGTCTCATTTTAACCCACTTATC	chrX:19502125-19502165	TCGGTCAGAGCATTGACGAC
chrX_C4	CGATTACCCGATAGGACGAATATCTATCATTATTATTTCCCTACAATTCTTCCCAGTGCCTCGGTCAGAGCATTGACGAC	CGATTACCCGATAGGACGAA	TATCTATCATTATTATTTCCCTACAATTCTTCCCAGTGCC	chrX:19502210-19502250	TCGGTCAGAGCATTGACGAC
chrX_C4	CGATTACCCGATAGGACGAAAGACATCTGAATCCAATTAGTGCTATCTATATCTTCATGGTCGGTCAGAGCATTGACGAC	CGATTACCCGATAGGACGAA	AGACATCTGAATCCAATTAGTGCTATCTATATCTTCATGG	chrX:19502294-19502334	TCGGTCAGAGCATTGACGAC
chrX_C4	CGATTACCCGATAGGACGAACCACTGGGGCATGAGTAACCTAATAATGGCAATGTCTCTGTCGGTCAGAGCATTGACGAC	CGATTACCCGATAGGACGAA	CCACTGGGGCATGAGTAACCTAATAATGGCAATGTCTCTG	chrX:19502346-19502386	TCGGTCAGAGCATTGACGAC
chrX_C4	CGATTACCCGATAGGACGAACCAGCCCTTGATAGCCATCAATTGGCATCAGCTCTTCTGATCGGTCAGAGCATTGACGAC	CGATTACCCGATAGGACGAA	CCAGCCCTTGATAGCCATCAATTGGCATCAGCTCTTCTGA	chrX:19502399-19502439	TCGGTCAGAGCATTGACGAC
chrX_C4	CGATTACCCGATAGGACGAATGAATGAGGCCTTAGGGATCATGCCTGCATTCATGCATGCTCGGTCAGAGCATTGACGAC	CGATTACCCGATAGGACGAA	TGAATGAGGCCTTAGGGATCATGCCTGCATTCATGCATGC	chrX:19502441-19502481	TCGGTCAGAGCATTGACGAC
chrX_C4	CGATTACCCGATAGGACGAAGAATTTTGACTACTTGGTCTTATGCATTCTAGCAGCTGTGTCGGTCAGAGCATTGACGAC	CGATTACCCGATAGGACGAA	GAATTTTGACTACTTGGTCTTATGCATTCTAGCAGCTGTG	chrX:19502483-19502523	TCGGTCAGAGCATTGACGAC
chrX_C4	CGATTACCCGATAGGACGAATTCTTATTTGCAAGTCTGGTATGCCATATCCAGAAGTCAGTCGGTCAGAGCATTGACGAC	CGATTACCCGATAGGACGAA	TTCTTATTTGCAAGTCTGGTATGCCATATCCAGAAGTCAG	chrX:19502525-19502565	TCGGTCAGAGCATTGACGAC
chrX_C4	CGATTACCCGATAGGACGAAAGCTGTGTTCTCTATCCACTGGCTTTTACATACTTCCTGGTCGGTCAGAGCATTGACGAC	CGATTACCCGATAGGACGAA	AGCTGTGTTCTCTATCCACTGGCTTTTACATACTTCCTGG	chrX:19502573-19502613	TCGGTCAGAGCATTGACGAC
chrX_C4	CGATTACCCGATAGGACGAACCATTACTCAAACTTCCCTGACCTTTTGAATAGTGAGATATCGGTCAGAGCATTGACGAC	CGATTACCCGATAGGACGAA	CCATTACTCAAACTTCCCTGACCTTTTGAATAGTGAGATA	chrX:19502615-19502655	TCGGTCAGAGCATTGACGAC
chrX_C4	CGATTACCCGATAGGACGAAACACAAACATGTAGAATGCAGTTTGGCAGCATTTGGTAATTCGGTCAGAGCATTGACGAC	CGATTACCCGATAGGACGAA	ACACAAACATGTAGAATGCAGTTTGGCAGCATTTGGTAAT	chrX:19502800-19502840	TCGGTCAGAGCATTGACGAC
chrX_C4	CGATTACCCGATAGGACGAAGTCAAAGCTCGTTTTAAAATCAAATTGTGGAGTAGAGATGTCGGTCAGAGCATTGACGAC	CGATTACCCGATAGGACGAA	GTCAAAGCTCGTTTTAAAATCAAATTGTGGAGTAGAGATG	chrX:19502927-19502967	TCGGTCAGAGCATTGACGAC
chrX_C4	CGATTACCCGATAGGACGAACTCGATGCTAGTATTTGCTTAACATGCTCAAGACCCTGGATCGGTCAGAGCATTGACGAC	CGATTACCCGATAGGACGAA	CTCGATGCTAGTATTTGCTTAACATGCTCAAGACCCTGGA	chrX:19502970-19503010	TCGGTCAGAGCATTGACGAC
chrX_C4	CGATTACCCGATAGGACGAATAAAGAAATGGGAAAAGTCTTTAGTTTATTGCAGCCTTGCTCGGTCAGAGCATTGACGAC	CGATTACCCGATAGGACGAA	TAAAGAAATGGGAAAAGTCTTTAGTTTATTGCAGCCTTGC	chrX:19503027-19503067	TCGGTCAGAGCATTGACGAC
chrX_C4	CGATTACCCGATAGGACGAATCCTCACTAATTATAGGAGATGTAGGGCTTGGGGATTTCCTCGGTCAGAGCATTGACGAC	CGATTACCCGATAGGACGAA	TCCTCACTAATTATAGGAGATGTAGGGCTTGGGGATTTCC	chrX:19503069-19503109	TCGGTCAGAGCATTGACGAC
chrX_C4	CGATTACCCGATAGGACGAATGTCAACAGTGCTATCTGTATGTACAGGGTTTTCTTTCTCTCGGTCAGAGCATTGACGAC	CGATTACCCGATAGGACGAA	TGTCAACAGTGCTATCTGTATGTACAGGGTTTTCTTTCTC	chrX:19503111-19503151	TCGGTCAGAGCATTGACGAC
chrX_C4	CGATTACCCGATAGGACGAAGTATTGGTTAGAATTCTGCTTAATAGTAGCAGTAAGAGAGTCGGTCAGAGCATTGACGAC	CGATTACCCGATAGGACGAA	GTATTGGTTAGAATTCTGCTTAATAGTAGCAGTAAGAGAG	chrX:19503190-19503230	TCGGTCAGAGCATTGACGAC
chrX_C4	CGATTACCCGATAGGACGAAACCATGATAGGAATAAAATTTCCCATTTCTCCCCATTAAGTCGGTCAGAGCATTGACGAC	CGATTACCCGATAGGACGAA	ACCATGATAGGAATAAAATTTCCCATTTCTCCCCATTAAG	chrX:19503248-19503288	TCGGTCAGAGCATTGACGAC
chrX_C4	CGATTACCCGATAGGACGAAATAACATTTGTAGATAATCCTTTAAGCAAGGAGGGTTTCCTCGGTCAGAGCATTGACGAC	CGATTACCCGATAGGACGAA	ATAACATTTGTAGATAATCCTTTAAGCAAGGAGGGTTTCC	chrX:19503299-19503339	TCGGTCAGAGCATTGACGAC
chrX_C4	CGATTACCCGATAGGACGAATTAGTTTACTGAGATGATTTGATGACATAAACGCACTTGGTCGGTCAGAGCATTGACGAC	CGATTACCCGATAGGACGAA	TTAGTTTACTGAGATGATTTGATGACATAAACGCACTTGG	chrX:19503346-19503386	TCGGTCAGAGCATTGACGAC
chrX_C4	CGATTACCCGATAGGACGAATTGCTATTACATTGTATCAAACTCTTGGCCCATCCATTGATCGGTCAGAGCATTGACGAC	CGATTACCCGATAGGACGAA	TTGCTATTACATTGTATCAAACTCTTGGCCCATCCATTGA	chrX:19503388-19503428	TCGGTCAGAGCATTGACGAC
chrX_C4	CGATTACCCGATAGGACGAATACTCAATGGTTAAACTAAGAAAGAGAATACACAGTTGGGTCGGTCAGAGCATTGACGAC	CGATTACCCGATAGGACGAA	TACTCAATGGTTAAACTAAGAAAGAGAATACACAGTTGGG	chrX:19503483-19503523	TCGGTCAGAGCATTGACGAC
chrX_C4	CGATTACCCGATAGGACGAAAAAAGGGGAGATGGAGCTGGCAGGAGTTTGTGGAAAAGGTTCGGTCAGAGCATTGACGAC	CGATTACCCGATAGGACGAA	AAAAGGGGAGATGGAGCTGGCAGGAGTTTGTGGAAAAGGT	chrX:19503531-19503571	TCGGTCAGAGCATTGACGAC
chrX_C4	CGATTACCCGATAGGACGAATTTATAGAAATACTAACACATATGGTTTTGTCCCTGGTCCACGTATGGGGTATTTGTCCG	CGATTACCCGATAGGACGAA	TTTATAGAAATACTAACACATATGGTTTTGTCCCTGGTCC	chrX:20497266-20497306	ACGTATGGGGTATTTGTCCG
chrX_C4	CGATTACCCGATAGGACGAAACTAAAGAGGTTTTAGATAATGATTGAATCTGTGGTAGGCACGTATGGGGTATTTGTCCG	CGATTACCCGATAGGACGAA	ACTAAAGAGGTTTTAGATAATGATTGAATCTGTGGTAGGC	chrX:20497368-20497408	ACGTATGGGGTATTTGTCCG
chrX_C4	CGATTACCCGATAGGACGAAAGGGGAAAATATCAAAGAATTATATTCAGGTTCCTTGACGACGTATGGGGTATTTGTCCG	CGATTACCCGATAGGACGAA	AGGGGAAAATATCAAAGAATTATATTCAGGTTCCTTGACG	chrX:20497467-20497507	ACGTATGGGGTATTTGTCCG
chrX_C4	CGATTACCCGATAGGACGAACACACCCAAATTATGGCATTTGTTTTAGAAATATACCAGGACGTATGGGGTATTTGTCCG	CGATTACCCGATAGGACGAA	CACACCCAAATTATGGCATTTGTTTTAGAAATATACCAGG	chrX:20497537-20497577	ACGTATGGGGTATTTGTCCG
chrX_C4	CGATTACCCGATAGGACGAAACTATAAATGATACCTCTCTCACACATTGGCAATAGCATTACGTATGGGGTATTTGTCCG	CGATTACCCGATAGGACGAA	ACTATAAATGATACCTCTCTCACACATTGGCAATAGCATT	chrX:20497579-20497619	ACGTATGGGGTATTTGTCCG
chrX_C4	CGATTACCCGATAGGACGAAACTGGGCCTTGCAGACTATAAACTGATATATATGAATGCTACGTATGGGGTATTTGTCCG	CGATTACCCGATAGGACGAA	ACTGGGCCTTGCAGACTATAAACTGATATATATGAATGCT	chrX:20497621-20497661	ACGTATGGGGTATTTGTCCG
chrX_C4	CGATTACCCGATAGGACGAAAAAAGACCTTCTTCCAAACTGGGCGTGGCAGTACACTTGAACGTATGGGGTATTTGTCCG	CGATTACCCGATAGGACGAA	AAAAGACCTTCTTCCAAACTGGGCGTGGCAGTACACTTGA	chrX:20497690-20497730	ACGTATGGGGTATTTGTCCG
chrX_C4	CGATTACCCGATAGGACGAACAGGAGGTTTGTGAGTTTGAAGGACCAATCTGGGATGAACACGTATGGGGTATTTGTCCG	CGATTACCCGATAGGACGAA	CAGGAGGTTTGTGAGTTTGAAGGACCAATCTGGGATGAAC	chrX:20497732-20497772	ACGTATGGGGTATTTGTCCG
chrX_C4	CGATTACCCGATAGGACGAAGTAATTTGGATCATAAATAACTACTTAGGTTAGAGCTCCCACGTATGGGGTATTTGTCCG	CGATTACCCGATAGGACGAA	GTAATTTGGATCATAAATAACTACTTAGGTTAGAGCTCCC	chrX:20497838-20497878	ACGTATGGGGTATTTGTCCG
chrX_C4	CGATTACCCGATAGGACGAATTGTTTACTCTCTAAAAGAATAGTGGCATATTGGCATCTGACGTATGGGGTATTTGTCCG	CGATTACCCGATAGGACGAA	TTGTTTACTCTCTAAAAGAATAGTGGCATATTGGCATCTG	chrX:20497918-20497958	ACGTATGGGGTATTTGTCCG
chrX_C4	CGATTACCCGATAGGACGAAACCTTTTATACTCCACCATATCATGTTCATTGTTCTTCAGACGTATGGGGTATTTGTCCG	CGATTACCCGATAGGACGAA	ACCTTTTATACTCCACCATATCATGTTCATTGTTCTTCAG	chrX:20497977-20498017	ACGTATGGGGTATTTGTCCG
chrX_C4	CGATTACCCGATAGGACGAATCGACTATAGATTCGCACTGCAGAAGTTTGTACCACTAGAACGTATGGGGTATTTGTCCG	CGATTACCCGATAGGACGAA	TCGACTATAGATTCGCACTGCAGAAGTTTGTACCACTAGA	chrX:20498019-20498059	ACGTATGGGGTATTTGTCCG
chrX_C4	CGATTACCCGATAGGACGAAGAATACTTAGTGTCAGAAATACTTAAGACTTTGCCAACTGACGTATGGGGTATTTGTCCG	CGATTACCCGATAGGACGAA	GAATACTTAGTGTCAGAAATACTTAAGACTTTGCCAACTG	chrX:20498171-20498211	ACGTATGGGGTATTTGTCCG
chrX_C4	CGATTACCCGATAGGACGAACTAAGTTTGTTAGCCTTATAAAACAGGTCTTAAGCAGTAGACGTATGGGGTATTTGTCCG	CGATTACCCGATAGGACGAA	CTAAGTTTGTTAGCCTTATAAAACAGGTCTTAAGCAGTAG	chrX:20498293-20498333	ACGTATGGGGTATTTGTCCG
chrX_C4	CGATTACCCGATAGGACGAACCTAGTTTAGATGATGGTGAATAAATGAGATAAGAACAGGACGTATGGGGTATTTGTCCG	CGATTACCCGATAGGACGAA	CCTAGTTTAGATGATGGTGAATAAATGAGATAAGAACAGG	chrX:20498339-20498379	ACGTATGGGGTATTTGTCCG
chrX_C4	CGATTACCCGATAGGACGAATTTACTGAGAAGAATCTGACAACTAAATAGAGGAAAGGTGACGTATGGGGTATTTGTCCG	CGATTACCCGATAGGACGAA	TTTACTGAGAAGAATCTGACAACTAAATAGAGGAAAGGTG	chrX:20498396-20498436	ACGTATGGGGTATTTGTCCG
chrX_C4	CGATTACCCGATAGGACGAAAGAAATAAATTCATCCTAGAATAGTGTGACAAGGAGTTGGACGTATGGGGTATTTGTCCG	CGATTACCCGATAGGACGAA	AGAAATAAATTCATCCTAGAATAGTGTGACAAGGAGTTGG	chrX:20498465-20498505	ACGTATGGGGTATTTGTCCG
chrX_C4	CGATTACCCGATAGGACGAAAGAGTAATAGTGGTGAGGATGGGGATGGAAAAGCAGTTCAACGTATGGGGTATTTGTCCG	CGATTACCCGATAGGACGAA	AGAGTAATAGTGGTGAGGATGGGGATGGAAAAGCAGTTCA	chrX:20498507-20498547	ACGTATGGGGTATTTGTCCG
chrX_C4	CGATTACCCGATAGGACGAACTCTGGGACTCAATGTAAGAAGTAAGTGCAGGCACCAAGTACGTATGGGGTATTTGTCCG	CGATTACCCGATAGGACGAA	CTCTGGGACTCAATGTAAGAAGTAAGTGCAGGCACCAAGT	chrX:20498549-20498589	ACGTATGGGGTATTTGTCCG
chrX_C4	CGATTACCCGATAGGACGAACAGTGGATGAAGGTAAGTAAGTAAAAGTCCAGGGATTTGGACGTATGGGGTATTTGTCCG	CGATTACCCGATAGGACGAA	CAGTGGATGAAGGTAAGTAAGTAAAAGTCCAGGGATTTGG	chrX:20498591-20498631	ACGTATGGGGTATTTGTCCG
chrX_C4	CGATTACCCGATAGGACGAAAGGTTAGCAATGGATGGTTATAATTCTTAGTGAATCTCACACGTATGGGGTATTTGTCCG	CGATTACCCGATAGGACGAA	AGGTTAGCAATGGATGGTTATAATTCTTAGTGAATCTCAC	chrX:20498654-20498694	ACGTATGGGGTATTTGTCCG
chrX_C4	CGATTACCCGATAGGACGAAAATTTTGAAACTGCTAGGTCTAATCAGTTGATGGTATAGGACGTATGGGGTATTTGTCCG	CGATTACCCGATAGGACGAA	AATTTTGAAACTGCTAGGTCTAATCAGTTGATGGTATAGG	chrX:20498723-20498763	ACGTATGGGGTATTTGTCCG
chrX_C4	CGATTACCCGATAGGACGAAGGGTATATTTAACTATGTGAGGAACCTAAAGGCAACTAGGACGTATGGGGTATTTGTCCG	CGATTACCCGATAGGACGAA	GGGTATATTTAACTATGTGAGGAACCTAAAGGCAACTAGG	chrX:20498765-20498805	ACGTATGGGGTATTTGTCCG
chrX_C4	CGATTACCCGATAGGACGAATCTTCTGAAATAGAGTAGAGCAATAAAGAGGGTCAAATGGACGTATGGGGTATTTGTCCG	CGATTACCCGATAGGACGAA	TCTTCTGAAATAGAGTAGAGCAATAAAGAGGGTCAAATGG	chrX:20498807-20498847	ACGTATGGGGTATTTGTCCG
chrX_C4	CGATTACCCGATAGGACGAAATCAAAGATGGGGACAGTCTAGAATAATTCCTAAGTAATCACGTATGGGGTATTTGTCCG	CGATTACCCGATAGGACGAA	ATCAAAGATGGGGACAGTCTAGAATAATTCCTAAGTAATC	chrX:20498852-20498892	ACGTATGGGGTATTTGTCCG
chrX_C4	CGATTACCCGATAGGACGAACTACATGACATGTTGAAATTACTCCATTATTGCTTGGATGACGTATGGGGTATTTGTCCG	CGATTACCCGATAGGACGAA	CTACATGACATGTTGAAATTACTCCATTATTGCTTGGATG	chrX:20499122-20499162	ACGTATGGGGTATTTGTCCG
chrX_C4	CGATTACCCGATAGGACGAATAAACAATGAAGACAGTTTGGAATACAGGAAAGTCTGTAGACGTATGGGGTATTTGTCCG	CGATTACCCGATAGGACGAA	TAAACAATGAAGACAGTTTGGAATACAGGAAAGTCTGTAG	chrX:20499172-20499212	ACGTATGGGGTATTTGTCCG
chrX_C4	CGATTACCCGATAGGACGAAAAGTTATTTCTCATAGGTACGCATGCTAATCTTAGTTCAGACGTATGGGGTATTTGTCCG	CGATTACCCGATAGGACGAA	AAGTTATTTCTCATAGGTACGCATGCTAATCTTAGTTCAG	chrX:20499282-20499322	ACGTATGGGGTATTTGTCCG
chrX_C4	CGATTACCCGATAGGACGAATTATGAAATCCTAGATATGAACTTGTTCAGCTATGTGTGCACGTATGGGGTATTTGTCCG	CGATTACCCGATAGGACGAA	TTATGAAATCCTAGATATGAACTTGTTCAGCTATGTGTGC	chrX:20499357-20499397	ACGTATGGGGTATTTGTCCG
chrX_C4	CGATTACCCGATAGGACGAATTTTCATACTTACCTACAGGCTTGCTATGGCATTCTCAAGACGTATGGGGTATTTGTCCG	CGATTACCCGATAGGACGAA	TTTTCATACTTACCTACAGGCTTGCTATGGCATTCTCAAG	chrX:20499405-20499445	ACGTATGGGGTATTTGTCCG
chrX_C4	CGATTACCCGATAGGACGAATCCAGAAGGTAGTTGGCTGTGCCGCTCCTGTGTCCTGGGCACGTATGGGGTATTTGTCCG	CGATTACCCGATAGGACGAA	TCCAGAAGGTAGTTGGCTGTGCCGCTCCTGTGTCCTGGGC	chrX:20499447-20499487	ACGTATGGGGTATTTGTCCG
chrX_C4	CGATTACCCGATAGGACGAATTATCCACAGTGTGTTTTATGTCCTAAGAAAGGTGGAGCCACGTATGGGGTATTTGTCCG	CGATTACCCGATAGGACGAA	TTATCCACAGTGTGTTTTATGTCCTAAGAAAGGTGGAGCC	chrX:20499489-20499529	ACGTATGGGGTATTTGTCCG
chrX_C4	CGATTACCCGATAGGACGAAGAAGACCACCAGAACAGGGACTAAATGGGCTCATGTCAGCACGTATGGGGTATTTGTCCG	CGATTACCCGATAGGACGAA	GAAGACCACCAGAACAGGGACTAAATGGGCTCATGTCAGC	chrX:20499531-20499571	ACGTATGGGGTATTTGTCCG
chrX_C4	CGATTACCCGATAGGACGAATGCCCTGTGGATTCCAGAAGTAAGTAACCATCCAAATCTGACGTATGGGGTATTTGTCCG	CGATTACCCGATAGGACGAA	TGCCCTGTGGATTCCAGAAGTAAGTAACCATCCAAATCTG	chrX:20499573-20499613	ACGTATGGGGTATTTGTCCG
chrX_C4	CGATTACCCGATAGGACGAACCAATTTCCTCCAGGGTACCTTCCTTCCTATGATGTTTAGACGTATGGGGTATTTGTCCG	CGATTACCCGATAGGACGAA	CCAATTTCCTCCAGGGTACCTTCCTTCCTATGATGTTTAG	chrX:20499615-20499655	ACGTATGGGGTATTTGTCCG
chrX_C4	CGATTACCCGATAGGACGAAAGACTCAGACTGATCATGGAAATGCTTTCTGCTCAACTGTACGTATGGGGTATTTGTCCG	CGATTACCCGATAGGACGAA	AGACTCAGACTGATCATGGAAATGCTTTCTGCTCAACTGT	chrX:20499657-20499697	ACGTATGGGGTATTTGTCCG
chrX_C4	CGATTACCCGATAGGACGAATTCTGAGATTTCTGTGCTACCTCCAGTCTTCTTGTATACAACGTATGGGGTATTTGTCCG	CGATTACCCGATAGGACGAA	TTCTGAGATTTCTGTGCTACCTCCAGTCTTCTTGTATACA	chrX:20499699-20499739	ACGTATGGGGTATTTGTCCG
chrX_C4	CGATTACCCGATAGGACGAATGTGCCTGTTAGCCCAGATTTCTGTATTTGTGAGTGATATACGTATGGGGTATTTGTCCG	CGATTACCCGATAGGACGAA	TGTGCCTGTTAGCCCAGATTTCTGTATTTGTGAGTGATAT	chrX:20499741-20499781	ACGTATGGGGTATTTGTCCG
chrX_C4	CGATTACCCGATAGGACGAATGATAAATTTGTATGAGAGAAGAGACATAAAAGTCCAGGGACGTATGGGGTATTTGTCCG	CGATTACCCGATAGGACGAA	TGATAAATTTGTATGAGAGAAGAGACATAAAAGTCCAGGG	chrX:20499794-20499834	ACGTATGGGGTATTTGTCCG
chrX_C4	CGATTACCCGATAGGACGAATGGGGCTAGAGGTAGCTTAGCTATTAGGAGCTCTTACAAAACGTATGGGGTATTTGTCCG	CGATTACCCGATAGGACGAA	TGGGGCTAGAGGTAGCTTAGCTATTAGGAGCTCTTACAAA	chrX:20499836-20499876	ACGTATGGGGTATTTGTCCG
chrX_C4	CGATTACCCGATAGGACGAAATCCAAGTTTAGCTTCCTGCATGTCAAGCAGCTCATAGATACGTATGGGGTATTTGTCCG	CGATTACCCGATAGGACGAA	ATCCAAGTTTAGCTTCCTGCATGTCAAGCAGCTCATAGAT	chrX:20499878-20499918	ACGTATGGGGTATTTGTCCG
chrX_C4	CGATTACCCGATAGGACGAATACCTGTAGCCACAAATCAAAATAAGACATGAAATACCACACGTATGGGGTATTTGTCCG	CGATTACCCGATAGGACGAA	TACCTGTAGCCACAAATCAAAATAAGACATGAAATACCAC	chrX:20500124-20500164	ACGTATGGGGTATTTGTCCG
chrX_C4	CGATTACCCGATAGGACGAAAAATATATAAATAGCATCCTGGAAAGGTCCCTAGTTCCTGACGTATGGGGTATTTGTCCG	CGATTACCCGATAGGACGAA	AAATATATAAATAGCATCCTGGAAAGGTCCCTAGTTCCTG	chrX:20500166-20500206	ACGTATGGGGTATTTGTCCG
chrX_C4	CGATTACCCGATAGGACGAAGAGTAAGTATTCTTTGTTGCCTGGCTAGAACTCCATGTTGACGTATGGGGTATTTGTCCG	CGATTACCCGATAGGACGAA	GAGTAAGTATTCTTTGTTGCCTGGCTAGAACTCCATGTTG	chrX:20500273-20500313	ACGTATGGGGTATTTGTCCG
chrX_C4	CGATTACCCGATAGGACGAATTTATTCTGCTTTGGATCTCTTATTCTAGGCTGTTACAAGACGTATGGGGTATTTGTCCG	CGATTACCCGATAGGACGAA	TTTATTCTGCTTTGGATCTCTTATTCTAGGCTGTTACAAG	chrX:20500381-20500421	ACGTATGGGGTATTTGTCCG
chrX_C4	CGATTACCCGATAGGACGAAAAGTAAACAATCACTCTTGCCCACTGTGGTAGTTTTCCTCACGTATGGGGTATTTGTCCG	CGATTACCCGATAGGACGAA	AAGTAAACAATCACTCTTGCCCACTGTGGTAGTTTTCCTC	chrX:20500423-20500463	ACGTATGGGGTATTTGTCCG
chrX_C4	CGATTACCCGATAGGACGAATAAAGACAAGGTTTCCCTCTTTTACTGACTAGCTGCCCTAACGTATGGGGTATTTGTCCG	CGATTACCCGATAGGACGAA	TAAAGACAAGGTTTCCCTCTTTTACTGACTAGCTGCCCTA	chrX:20500473-20500513	ACGTATGGGGTATTTGTCCG
chrX_C4	CGATTACCCGATAGGACGAACAAATTCTGGTATTAAGGACTACCACACCTAGCTAGTTGTACGTATGGGGTATTTGTCCG	CGATTACCCGATAGGACGAA	CAAATTCTGGTATTAAGGACTACCACACCTAGCTAGTTGT	chrX:20500545-20500585	ACGTATGGGGTATTTGTCCG
chrX_C4	CGATTACCCGATAGGACGAAAAAAGCTCTTTTGAGTGCTTAAACTCAACACTTACCTAAGACGTATGGGGTATTTGTCCG	CGATTACCCGATAGGACGAA	AAAAGCTCTTTTGAGTGCTTAAACTCAACACTTACCTAAG	chrX:20500595-20500635	ACGTATGGGGTATTTGTCCG
chrX_C4	CGATTACCCGATAGGACGAATAACTTAATTAAACATGGCTTCTAAACTGAGCATGGTAGGACGTATGGGGTATTTGTCCG	CGATTACCCGATAGGACGAA	TAACTTAATTAAACATGGCTTCTAAACTGAGCATGGTAGG	chrX:20500711-20500751	ACGTATGGGGTATTTGTCCG
chrX_C4	CGATTACCCGATAGGACGAAAGGCAGGAGGACTGAGATCTGGAAGCCATCTTGGAGATGTACGTATGGGGTATTTGTCCG	CGATTACCCGATAGGACGAA	AGGCAGGAGGACTGAGATCTGGAAGCCATCTTGGAGATGT	chrX:20500783-20500823	ACGTATGGGGTATTTGTCCG
chrX_C4	CGATTACCCGATAGGACGAAAGTAAGCTCAAAGACAGCCTGCATATCTAGACTCAGTAAAACGTATGGGGTATTTGTCCG	CGATTACCCGATAGGACGAA	AGTAAGCTCAAAGACAGCCTGCATATCTAGACTCAGTAAA	chrX:20500825-20500865	ACGTATGGGGTATTTGTCCG
chrX_C4	CGATTACCCGATAGGACGAAAAAACCAGTAGTTTGGGGTAGGGTATAGTAAGTGGTAGAGACGTATGGGGTATTTGTCCG	CGATTACCCGATAGGACGAA	AAAACCAGTAGTTTGGGGTAGGGTATAGTAAGTGGTAGAG	chrX:20500871-20500911	ACGTATGGGGTATTTGTCCG
chrX_C4	CGATTACCCGATAGGACGAAAGGCTTGGTATTGTATGCCTGTAATCCTTCATCCTTGGATACGTATGGGGTATTTGTCCG	CGATTACCCGATAGGACGAA	AGGCTTGGTATTGTATGCCTGTAATCCTTCATCCTTGGAT	chrX:20500978-20501018	ACGTATGGGGTATTTGTCCG
chrX_C4	CGATTACCCGATAGGACGAAGATAATCAAAAGCTAAAACCAGCCTTGCTACATAGCAACCACGTATGGGGTATTTGTCCG	CGATTACCCGATAGGACGAA	GATAATCAAAAGCTAAAACCAGCCTTGCTACATAGCAACC	chrX:20501028-20501068	ACGTATGGGGTATTTGTCCG
chrX_C4	CGATTACCCGATAGGACGAAAAAATCAGGGAACATAGCTGAGACATTATTTGCTTAGCATACGTATGGGGTATTTGTCCG	CGATTACCCGATAGGACGAA	AAAATCAGGGAACATAGCTGAGACATTATTTGCTTAGCAT	chrX:20501113-20501153	ACGTATGGGGTATTTGTCCG
chrX_C4	CGATTACCCGATAGGACGAAAAAATAAAATCACCTATAATCTCGGCACTCAGAAGGCTAGACGTATGGGGTATTTGTCCG	CGATTACCCGATAGGACGAA	AAAATAAAATCACCTATAATCTCGGCACTCAGAAGGCTAG	chrX:20501192-20501232	ACGTATGGGGTATTTGTCCG
chrX_C4	CGATTACCCGATAGGACGAAAAACGTTAATTAACGTTCTCTTAGGGCTTCTCAATTCTTGACGTATGGGGTATTTGTCCG	CGATTACCCGATAGGACGAA	AAACGTTAATTAACGTTCTCTTAGGGCTTCTCAATTCTTG	chrX:20501316-20501356	ACGTATGGGGTATTTGTCCG
chrX_C4	CGATTACCCGATAGGACGAATTAGATTATTAAAGATCTCTCCTGATCTGGACAGAACTTGACGTATGGGGTATTTGTCCG	CGATTACCCGATAGGACGAA	TTAGATTATTAAAGATCTCTCCTGATCTGGACAGAACTTG	chrX:20501370-20501410	ACGTATGGGGTATTTGTCCG
chrX_C4	CGATTACCCGATAGGACGAATTGAAACCTGTTTATTTCTGGTATTGGAGAGATTGTCTAGACGTATGGGGTATTTGTCCG	CGATTACCCGATAGGACGAA	TTGAAACCTGTTTATTTCTGGTATTGGAGAGATTGTCTAG	chrX:20501448-20501488	ACGTATGGGGTATTTGTCCG
chrX_C4	CGATTACCCGATAGGACGAATGCACACACAGGCACAACATTTGTACATGTATAAAGTTGTACGTATGGGGTATTTGTCCG	CGATTACCCGATAGGACGAA	TGCACACACAGGCACAACATTTGTACATGTATAAAGTTGT	chrX:20501639-20501679	ACGTATGGGGTATTTGTCCG
chrX_C4	CGATTACCCGATAGGACGAATTACCAGTAGTTACATGACCCTTTATTTCCAAATGGAAAGACGTATGGGGTATTTGTCCG	CGATTACCCGATAGGACGAA	TTACCAGTAGTTACATGACCCTTTATTTCCAAATGGAAAG	chrX:20501698-20501738	ACGTATGGGGTATTTGTCCG
chrX_C4	CGATTACCCGATAGGACGAATTTAAAGTGTCCTTTTCCTTTCAGCATTCCCAAAGACTTAACGTATGGGGTATTTGTCCG	CGATTACCCGATAGGACGAA	TTTAAAGTGTCCTTTTCCTTTCAGCATTCCCAAAGACTTA	chrX:20501751-20501791	ACGTATGGGGTATTTGTCCG
chrX_C4	CGATTACCCGATAGGACGAATTCACTTTGAAGCTACTTTGGCTGAGAGAGTAGGGTAAGAACGTATGGGGTATTTGTCCG	CGATTACCCGATAGGACGAA	TTCACTTTGAAGCTACTTTGGCTGAGAGAGTAGGGTAAGA	chrX:20501793-20501833	ACGTATGGGGTATTTGTCCG
chrX_C4	CGATTACCCGATAGGACGAAGTTACATAGTCTTAAAGATTTGGGGTTTAGAAGTGGTATCACGTATGGGGTATTTGTCCG	CGATTACCCGATAGGACGAA	GTTACATAGTCTTAAAGATTTGGGGTTTAGAAGTGGTATC	chrX:20501841-20501881	ACGTATGGGGTATTTGTCCG
chrX_C4	CGATTACCCGATAGGACGAACCTCATCCTTTCTAATTACATGCTGCAGTCCCTTCATTACACGTATGGGGTATTTGTCCG	CGATTACCCGATAGGACGAA	CCTCATCCTTTCTAATTACATGCTGCAGTCCCTTCATTAC	chrX:20501883-20501923	ACGTATGGGGTATTTGTCCG
chrX_C4	CGATTACCCGATAGGACGAATTGCTGTTACTTTGCAACAGTATTATGCTGCTTTGTAAACACGTATGGGGTATTTGTCCG	CGATTACCCGATAGGACGAA	TTGCTGTTACTTTGCAACAGTATTATGCTGCTTTGTAAAC	chrX:20501929-20501969	ACGTATGGGGTATTTGTCCG
chrX_C4	CGATTACCCGATAGGACGAAAATAGAAAGATCTGTCACTGCCTTTCTTTATCGTTAGTTGACGTATGGGGTATTTGTCCG	CGATTACCCGATAGGACGAA	AATAGAAAGATCTGTCACTGCCTTTCTTTATCGTTAGTTG	chrX:20501971-20502011	ACGTATGGGGTATTTGTCCG
chrX_C4	CGATTACCCGATAGGACGAATGAAATAGCAAGGCATGTGATACCATCTCTAACATAAAACACGTATGGGGTATTTGTCCG	CGATTACCCGATAGGACGAA	TGAAATAGCAAGGCATGTGATACCATCTCTAACATAAAAC	chrX:20502017-20502057	ACGTATGGGGTATTTGTCCG
chrX_C4	CGATTACCCGATAGGACGAATCCTTTCCTAAGTAGCTTTCTTCTAAGTAAAGATGGATACACGTATGGGGTATTTGTCCG	CGATTACCCGATAGGACGAA	TCCTTTCCTAAGTAGCTTTCTTCTAAGTAAAGATGGATAC	chrX:20502083-20502123	ACGTATGGGGTATTTGTCCG
chrX_C4	CGATTACCCGATAGGACGAACTTGATTCTTTTAGGTAACTATGCCTACCTAGTCTACACTACGTATGGGGTATTTGTCCG	CGATTACCCGATAGGACGAA	CTTGATTCTTTTAGGTAACTATGCCTACCTAGTCTACACT	chrX:20502125-20502165	ACGTATGGGGTATTTGTCCG
chrX_C4	CGATTACCCGATAGGACGAATTGTTTACATTACTAGAAATGATTGAAGGACTGAGCAGTGACGTATGGGGTATTTGTCCG	CGATTACCCGATAGGACGAA	TTGTTTACATTACTAGAAATGATTGAAGGACTGAGCAGTG	chrX:20502190-20502230	ACGTATGGGGTATTTGTCCG
chrX_C4	CGATTACCCGATAGGACGAATTTTATTCTTAGTTCCGTACTAACCTTGGAAGATATGGCTACGTATGGGGTATTTGTCCG	CGATTACCCGATAGGACGAA	TTTTATTCTTAGTTCCGTACTAACCTTGGAAGATATGGCT	chrX:20502245-20502285	ACGTATGGGGTATTTGTCCG
chrX_C4	CGATTACCCGATAGGACGAATTGACATGCCTTGGTGCTTCTGCCTTATGATGATGTTTTAACGTATGGGGTATTTGTCCG	CGATTACCCGATAGGACGAA	TTGACATGCCTTGGTGCTTCTGCCTTATGATGATGTTTTA	chrX:20502347-20502387	ACGTATGGGGTATTTGTCCG
chrX_C4	CGATTACCCGATAGGACGAATGTAGGTCAGTATCGCTTGTCCTGAGAGAATGGAGCCTGTACGTATGGGGTATTTGTCCG	CGATTACCCGATAGGACGAA	TGTAGGTCAGTATCGCTTGTCCTGAGAGAATGGAGCCTGT	chrX:20502389-20502429	ACGTATGGGGTATTTGTCCG
chrX_C4	CGATTACCCGATAGGACGAAAAAATCTCCCATATCCCACCTAGCCGGTGGGCCTTAGTTTACGTATGGGGTATTTGTCCG	CGATTACCCGATAGGACGAA	AAAATCTCCCATATCCCACCTAGCCGGTGGGCCTTAGTTT	chrX:20502433-20502473	ACGTATGGGGTATTTGTCCG
chrX_C4	CGATTACCCGATAGGACGAAAACCTGTGCAAGTTGAAGACAGGGGCTTGTATTCAGGTAAACGTATGGGGTATTTGTCCG	CGATTACCCGATAGGACGAA	AACCTGTGCAAGTTGAAGACAGGGGCTTGTATTCAGGTAA	chrX:20502475-20502515	ACGTATGGGGTATTTGTCCG
chrX_C4	CGATTACCCGATAGGACGAATCCCTGAGAAATGGTGGAGTAAGCTAAAACCAAGTCAACCACGTATGGGGTATTTGTCCG	CGATTACCCGATAGGACGAA	TCCCTGAGAAATGGTGGAGTAAGCTAAAACCAAGTCAACC	chrX:20502517-20502557	ACGTATGGGGTATTTGTCCG
chrX_C4	CGATTACCCGATAGGACGAAACTCATGGTCCCAGTAAGAGTGTCCTGTTACCCCAGAAATACGTATGGGGTATTTGTCCG	CGATTACCCGATAGGACGAA	ACTCATGGTCCCAGTAAGAGTGTCCTGTTACCCCAGAAAT	chrX:20502559-20502599	ACGTATGGGGTATTTGTCCG
chrX_C4	CGATTACCCGATAGGACGAACTTGAGAGGCTACCTACTCATGTGTAGGATACTGTCACTCACGTATGGGGTATTTGTCCG	CGATTACCCGATAGGACGAA	CTTGAGAGGCTACCTACTCATGTGTAGGATACTGTCACTC	chrX:20502601-20502641	ACGTATGGGGTATTTGTCCG
chrX_C4	CGATTACCCGATAGGACGAATTTTACTTATGTGTATGTAGGTGGGTGCCTTAGAGGTCATACGTATGGGGTATTTGTCCG	CGATTACCCGATAGGACGAA	TTTTACTTATGTGTATGTAGGTGGGTGCCTTAGAGGTCAT	chrX:20502722-20502762	ACGTATGGGGTATTTGTCCG
chrX_C4	CGATTACCCGATAGGACGAACTTAACCAGTAAGCTATCTCTCCAACCTTTAAGCCTATTAACGTATGGGGTATTTGTCCG	CGATTACCCGATAGGACGAA	CTTAACCAGTAAGCTATCTCTCCAACCTTTAAGCCTATTA	chrX:20502867-20502907	ACGTATGGGGTATTTGTCCG
chrX_C4	CGATTACCCGATAGGACGAATCAACATTCATATTGGTTACCAGGAATAGTGATACACATGACGTATGGGGTATTTGTCCG	CGATTACCCGATAGGACGAA	TCAACATTCATATTGGTTACCAGGAATAGTGATACACATG	chrX:20502910-20502950	ACGTATGGGGTATTTGTCCG
chrX_C4	CGATTACCCGATAGGACGAATGTCCCAGCTTCTCAAGGTATTGAGGCAGAAGAAAATCATACGTATGGGGTATTTGTCCG	CGATTACCCGATAGGACGAA	TGTCCCAGCTTCTCAAGGTATTGAGGCAGAAGAAAATCAT	chrX:20502952-20502992	ACGTATGGGGTATTTGTCCG
chrX_C4	CGATTACCCGATAGGACGAAAATGTTCATCTTTTAGTGTCAGAGCTCATGTATCAACTAGACGTATGGGGTATTTGTCCG	CGATTACCCGATAGGACGAA	AATGTTCATCTTTTAGTGTCAGAGCTCATGTATCAACTAG	chrX:20503069-20503109	ACGTATGGGGTATTTGTCCG
chrX_C4	CGATTACCCGATAGGACGAATCTAAAGCTGAGTAATTTCATTCTGAGAGGGAATAAGCTAACGTATGGGGTATTTGTCCG	CGATTACCCGATAGGACGAA	TCTAAAGCTGAGTAATTTCATTCTGAGAGGGAATAAGCTA	chrX:20503111-20503151	ACGTATGGGGTATTTGTCCG
chrX_C4	CGATTACCCGATAGGACGAAACTCTAAAATATGTAACCCATGTTCTGATCAGTTTCATCCACGTATGGGGTATTTGTCCG	CGATTACCCGATAGGACGAA	ACTCTAAAATATGTAACCCATGTTCTGATCAGTTTCATCC	chrX:20503153-20503193	ACGTATGGGGTATTTGTCCG
chrX_C4	CGATTACCCGATAGGACGAAGATCCACTATGATTAGATAGATGGTTCTGTAAACCATTTGACGTATGGGGTATTTGTCCG	CGATTACCCGATAGGACGAA	GATCCACTATGATTAGATAGATGGTTCTGTAAACCATTTG	chrX:20503214-20503254	ACGTATGGGGTATTTGTCCG
chrX_C4	CGATTACCCGATAGGACGAATGTGGAAAGGTACATTTGAATAGATAAAAGTCTGGTGACTACGTATGGGGTATTTGTCCG	CGATTACCCGATAGGACGAA	TGTGGAAAGGTACATTTGAATAGATAAAAGTCTGGTGACT	chrX:20503256-20503296	ACGTATGGGGTATTTGTCCG
chrX_C4	CGATTACCCGATAGGACGAAGAAAGTCCAAGATCTGAGACCCTCACACCTTTGCATAGGTACGTATGGGGTATTTGTCCG	CGATTACCCGATAGGACGAA	GAAAGTCCAAGATCTGAGACCCTCACACCTTTGCATAGGT	chrX:20503415-20503455	ACGTATGGGGTATTTGTCCG
chrX_C4	CGATTACCCGATAGGACGAATTATTCTTATAGGCATATATGGTACATGTGGTAGTACAGGACGTATGGGGTATTTGTCCG	CGATTACCCGATAGGACGAA	TTATTCTTATAGGCATATATGGTACATGTGGTAGTACAGG	chrX:20503508-20503548	ACGTATGGGGTATTTGTCCG
chrX_C4	CGATTACCCGATAGGACGAAGTTATGTTCACTTTCTATTCCAAGCATAATAAGGTGACTGACGTATGGGGTATTTGTCCG	CGATTACCCGATAGGACGAA	GTTATGTTCACTTTCTATTCCAAGCATAATAAGGTGACTG	chrX:20503577-20503617	ACGTATGGGGTATTTGTCCG
chrX_C4	CGATTACCCGATAGGACGAATGTATGTGGGAAGGAAGGACTAACTGACTGTAACTTACTGACGTATGGGGTATTTGTCCG	CGATTACCCGATAGGACGAA	TGTATGTGGGAAGGAAGGACTAACTGACTGTAACTTACTG	chrX:20503619-20503659	ACGTATGGGGTATTTGTCCG
chrX_C4	CGATTACCCGATAGGACGAATATGAGCTGCAGAGTGCTTGAGATCAGATTTGCCTGCAGAACGTATGGGGTATTTGTCCG	CGATTACCCGATAGGACGAA	TATGAGCTGCAGAGTGCTTGAGATCAGATTTGCCTGCAGA	chrX:20503661-20503701	ACGTATGGGGTATTTGTCCG
chrX_C4	CGATTACCCGATAGGACGAACTCAGAGAAAGGGGTCTCTGTAACGTCATACCTTAGAGCAACGTATGGGGTATTTGTCCG	CGATTACCCGATAGGACGAA	CTCAGAGAAAGGGGTCTCTGTAACGTCATACCTTAGAGCA	chrX:20503703-20503743	ACGTATGGGGTATTTGTCCG
chrX_C4	CGATTACCCGATAGGACGAATTTAGTTCACTTCTGTTTAGCATAACAGGTTGCAGATTTGACGTATGGGGTATTTGTCCG	CGATTACCCGATAGGACGAA	TTTAGTTCACTTCTGTTTAGCATAACAGGTTGCAGATTTG	chrX:20503761-20503801	ACGTATGGGGTATTTGTCCG
chrX_C4	CGATTACCCGATAGGACGAATCTCCTGAGAAGTCCTGCCAGAACCTTTGCAACACTAACTCCGTTAGTTAGTCCACGTCG	CGATTACCCGATAGGACGAA	TCTCCTGAGAAGTCCTGCCAGAACCTTTGCAACACTAACT	chrX:21738991-21739031	CCGTTAGTTAGTCCACGTCG
chrX_C4	CGATTACCCGATAGGACGAATTTTATTCAAGAAGAGGCTAGGAGGGAATTGTGTTTTGTTCCGTTAGTTAGTCCACGTCG	CGATTACCCGATAGGACGAA	TTTTATTCAAGAAGAGGCTAGGAGGGAATTGTGTTTTGTT	chrX:21739047-21739087	CCGTTAGTTAGTCCACGTCG
chrX_C4	CGATTACCCGATAGGACGAAATGTGCCAGTACTACATGTTTAAATTTGAGTAATGGGGTACCGTTAGTTAGTCCACGTCG	CGATTACCCGATAGGACGAA	ATGTGCCAGTACTACATGTTTAAATTTGAGTAATGGGGTA	chrX:21739089-21739129	CCGTTAGTTAGTCCACGTCG
chrX_C4	CGATTACCCGATAGGACGAAGGGGAAGAAAGTTGTGTCTTGTACAACAAATAACAGCAGGCCGTTAGTTAGTCCACGTCG	CGATTACCCGATAGGACGAA	GGGGAAGAAAGTTGTGTCTTGTACAACAAATAACAGCAGG	chrX:21739136-21739176	CCGTTAGTTAGTCCACGTCG
chrX_C4	CGATTACCCGATAGGACGAAAGGAGGGACAGAAAAGTCTACTTGTGTATTCTCACTGGATCCGTTAGTTAGTCCACGTCG	CGATTACCCGATAGGACGAA	AGGAGGGACAGAAAAGTCTACTTGTGTATTCTCACTGGAT	chrX:21739178-21739218	CCGTTAGTTAGTCCACGTCG
chrX_C4	CGATTACCCGATAGGACGAATTCATATATATGCTAGCTAGCTTGTGGCATAGAATGAAACCCGTTAGTTAGTCCACGTCG	CGATTACCCGATAGGACGAA	TTCATATATATGCTAGCTAGCTTGTGGCATAGAATGAAAC	chrX:21739223-21739263	CCGTTAGTTAGTCCACGTCG
chrX_C4	CGATTACCCGATAGGACGAAAACTAACAGTTTAATCTCCTTGTGTATGTGTCCACAAGAACCGTTAGTTAGTCCACGTCG	CGATTACCCGATAGGACGAA	AACTAACAGTTTAATCTCCTTGTGTATGTGTCCACAAGAA	chrX:21739265-21739305	CCGTTAGTTAGTCCACGTCG
chrX_C4	CGATTACCCGATAGGACGAATTTGCCTTGGAGAAAACTCTATAATGCCTTCTATTGTTACCCGTTAGTTAGTCCACGTCG	CGATTACCCGATAGGACGAA	TTTGCCTTGGAGAAAACTCTATAATGCCTTCTATTGTTAC	chrX:21739335-21739375	CCGTTAGTTAGTCCACGTCG
chrX_C4	CGATTACCCGATAGGACGAATTTTAATGCTTTCCTTTCTTAGGCAATTCTAGTCTGGTCACCGTTAGTTAGTCCACGTCG	CGATTACCCGATAGGACGAA	TTTTAATGCTTTCCTTTCTTAGGCAATTCTAGTCTGGTCA	chrX:21739472-21739512	CCGTTAGTTAGTCCACGTCG
chrX_C4	CGATTACCCGATAGGACGAAGGTGAAATTTCACAGACCTGATTATGCTGATATTCCATATCCGTTAGTTAGTCCACGTCG	CGATTACCCGATAGGACGAA	GGTGAAATTTCACAGACCTGATTATGCTGATATTCCATAT	chrX:21739514-21739554	CCGTTAGTTAGTCCACGTCG
chrX_C4	CGATTACCCGATAGGACGAATGACTGGGGAGTTGCTCTTGGCTGGTGTATGATCATTTTCCCGTTAGTTAGTCCACGTCG	CGATTACCCGATAGGACGAA	TGACTGGGGAGTTGCTCTTGGCTGGTGTATGATCATTTTC	chrX:21739556-21739596	CCGTTAGTTAGTCCACGTCG
chrX_C4	CGATTACCCGATAGGACGAAAAAATAGTTCAGGCAGAAGGAAACATACTTCAGGTAAGCACCGTTAGTTAGTCCACGTCG	CGATTACCCGATAGGACGAA	AAAATAGTTCAGGCAGAAGGAAACATACTTCAGGTAAGCA	chrX:21739629-21739669	CCGTTAGTTAGTCCACGTCG
chrX_C4	CGATTACCCGATAGGACGAACTTTACTATAAGTTCCTTGTAGAAGTCTGTTACTGTATCCCCGTTAGTTAGTCCACGTCG	CGATTACCCGATAGGACGAA	CTTTACTATAAGTTCCTTGTAGAAGTCTGTTACTGTATCC	chrX:21739713-21739753	CCGTTAGTTAGTCCACGTCG
chrX_C4	CGATTACCCGATAGGACGAAAGGTCTTACTGCACTCTTTAGGACATAACATTTGTGATCTCCGTTAGTTAGTCCACGTCG	CGATTACCCGATAGGACGAA	AGGTCTTACTGCACTCTTTAGGACATAACATTTGTGATCT	chrX:21739755-21739795	CCGTTAGTTAGTCCACGTCG
chrX_C4	CGATTACCCGATAGGACGAAAGCAAATGACCCATTTGCTTCTTCTCTATGTAATCTTTACCCGTTAGTTAGTCCACGTCG	CGATTACCCGATAGGACGAA	AGCAAATGACCCATTTGCTTCTTCTCTATGTAATCTTTAC	chrX:21739835-21739875	CCGTTAGTTAGTCCACGTCG
chrX_C4	CGATTACCCGATAGGACGAATGAATTAGCCTGGTAAATTATCTTTCATCCTTTACTGCTCCCGTTAGTTAGTCCACGTCG	CGATTACCCGATAGGACGAA	TGAATTAGCCTGGTAAATTATCTTTCATCCTTTACTGCTC	chrX:21739935-21739975	CCGTTAGTTAGTCCACGTCG
chrX_C4	CGATTACCCGATAGGACGAAGAATCATCTTTCTTCCACAGAGGCCTACAGTAATAGCGTTCCGTTAGTTAGTCCACGTCG	CGATTACCCGATAGGACGAA	GAATCATCTTTCTTCCACAGAGGCCTACAGTAATAGCGTT	chrX:21739977-21740017	CCGTTAGTTAGTCCACGTCG
chrX_C4	CGATTACCCGATAGGACGAATCAAGTCTACACTGACAAGATAGGCTTAGGAAACTTCATTCCGTTAGTTAGTCCACGTCG	CGATTACCCGATAGGACGAA	TCAAGTCTACACTGACAAGATAGGCTTAGGAAACTTCATT	chrX:21740019-21740059	CCGTTAGTTAGTCCACGTCG
chrX_C4	CGATTACCCGATAGGACGAAAGTTACTTCCTCTTCTTATCCAAGAGCAGATCTAAAGAAACCGTTAGTTAGTCCACGTCG	CGATTACCCGATAGGACGAA	AGTTACTTCCTCTTCTTATCCAAGAGCAGATCTAAAGAAA	chrX:21740061-21740101	CCGTTAGTTAGTCCACGTCG
chrX_C4	CGATTACCCGATAGGACGAATTTTGAAACATATCCAGTGCACAATAGTTTAGCTTCCCATCCGTTAGTTAGTCCACGTCG	CGATTACCCGATAGGACGAA	TTTTGAAACATATCCAGTGCACAATAGTTTAGCTTCCCAT	chrX:21740132-21740172	CCGTTAGTTAGTCCACGTCG
chrX_C4	CGATTACCCGATAGGACGAAGATTCTCTGTGACAAGGACTAAAATGAATGCAAGAAAGCTCCGTTAGTTAGTCCACGTCG	CGATTACCCGATAGGACGAA	GATTCTCTGTGACAAGGACTAAAATGAATGCAAGAAAGCT	chrX:21740174-21740214	CCGTTAGTTAGTCCACGTCG
chrX_C4	CGATTACCCGATAGGACGAAAAAGGTGTCATAGACCTATCTTCTGAAATCATTCTTTTGGCCGTTAGTTAGTCCACGTCG	CGATTACCCGATAGGACGAA	AAAGGTGTCATAGACCTATCTTCTGAAATCATTCTTTTGG	chrX:21740226-21740266	CCGTTAGTTAGTCCACGTCG
chrX_C4	CGATTACCCGATAGGACGAACCCCACTCCCTGCCCATTACTGCCTTCCTTTCTCCTCAGACCGTTAGTTAGTCCACGTCG	CGATTACCCGATAGGACGAA	CCCCACTCCCTGCCCATTACTGCCTTCCTTTCTCCTCAGA	chrX:21740401-21740441	CCGTTAGTTAGTCCACGTCG
chrX_C4	CGATTACCCGATAGGACGAAAAGGGAAGACTGCCTTGAATAGACCCGACTCTGGCACATCCCGTTAGTTAGTCCACGTCG	CGATTACCCGATAGGACGAA	AAGGGAAGACTGCCTTGAATAGACCCGACTCTGGCACATC	chrX:21740443-21740483	CCGTTAGTTAGTCCACGTCG
chrX_C4	CGATTACCCGATAGGACGAAAACAGAGACCAAAATAGCCCTGCTCCAGTTATTAGAGGATCCGTTAGTTAGTCCACGTCG	CGATTACCCGATAGGACGAA	AACAGAGACCAAAATAGCCCTGCTCCAGTTATTAGAGGAT	chrX:21740570-21740610	CCGTTAGTTAGTCCACGTCG
chrX_C4	CGATTACCCGATAGGACGAAATTTGCTATAAATGCTTAGGGGACTAGTTCCAGCTCCCTGCCGTTAGTTAGTCCACGTCG	CGATTACCCGATAGGACGAA	ATTTGCTATAAATGCTTAGGGGACTAGTTCCAGCTCCCTG	chrX:21740632-21740672	CCGTTAGTTAGTCCACGTCG
chrX_C4	CGATTACCCGATAGGACGAACCCCGTTGGTGGCCCAGTCTTTGCGAGCCCTATTAGTTGACCGTTAGTTAGTCCACGTCG	CGATTACCCGATAGGACGAA	CCCCGTTGGTGGCCCAGTCTTTGCGAGCCCTATTAGTTGA	chrX:21740684-21740724	CCGTTAGTTAGTCCACGTCG
chrX_C4	CGATTACCCGATAGGACGAACTACATCTTCTTGTGTCCTTGTTCCCTCCTGTCAATCTCTCCGTTAGTTAGTCCACGTCG	CGATTACCCGATAGGACGAA	CTACATCTTCTTGTGTCCTTGTTCCCTCCTGTCAATCTCT	chrX:21740726-21740766	CCGTTAGTTAGTCCACGTCG
chrX_C4	CGATTACCCGATAGGACGAACCCATCAAACTCTTCCATAAGACTCTAGAGCTTCCTACTTCCGTTAGTTAGTCCACGTCG	CGATTACCCGATAGGACGAA	CCCATCAAACTCTTCCATAAGACTCTAGAGCTTCCTACTT	chrX:21740768-21740808	CCGTTAGTTAGTCCACGTCG
chrX_C4	CGATTACCCGATAGGACGAACTATGATTGTTATGTCATTCTTGCTAGCAAAAGCCTTTACCCGTTAGTTAGTCCACGTCG	CGATTACCCGATAGGACGAA	CTATGATTGTTATGTCATTCTTGCTAGCAAAAGCCTTTAC	chrX:21740810-21740850	CCGTTAGTTAGTCCACGTCG
chrX_C4	CGATTACCCGATAGGACGAATTTTGTCATTGCATTTCAGCGTATCATAAGCTGCTGTAGACCGTTAGTTAGTCCACGTCG	CGATTACCCGATAGGACGAA	TTTTGTCATTGCATTTCAGCGTATCATAAGCTGCTGTAGA	chrX:21740923-21740963	CCGTTAGTTAGTCCACGTCG
chrX_C4	CGATTACCCGATAGGACGAAAAAACATCGTGGGGAGAGATACAGAGACATGGCTGAACCTCCGTTAGTTAGTCCACGTCG	CGATTACCCGATAGGACGAA	AAAACATCGTGGGGAGAGATACAGAGACATGGCTGAACCT	chrX:21740992-21741032	CCGTTAGTTAGTCCACGTCG
chrX_C4	CGATTACCCGATAGGACGAAAAAGGAGACTGACCACGAAATACCTACTATTAGTGGCAGTCCGTTAGTTAGTCCACGTCG	CGATTACCCGATAGGACGAA	AAAGGAGACTGACCACGAAATACCTACTATTAGTGGCAGT	chrX:21741034-21741074	CCGTTAGTTAGTCCACGTCG
chrX_C4	CGATTACCCGATAGGACGAAGTATGTTAATCAATTAGGGAAATGTACATGTCATGCTCAGCCGTTAGTTAGTCCACGTCG	CGATTACCCGATAGGACGAA	GTATGTTAATCAATTAGGGAAATGTACATGTCATGCTCAG	chrX:21741162-21741202	CCGTTAGTTAGTCCACGTCG
chrX_C4	CGATTACCCGATAGGACGAAGCTATTTGTTAGTACATATACCCAGTTCTGTTTTGCAATGCCGTTAGTTAGTCCACGTCG	CGATTACCCGATAGGACGAA	GCTATTTGTTAGTACATATACCCAGTTCTGTTTTGCAATG	chrX:21741296-21741336	CCGTTAGTTAGTCCACGTCG
chrX_C4	CGATTACCCGATAGGACGAATTTTAGTGTACTGAAGGTCTCCTGTGAGATGATTACTTACCCGTTAGTTAGTCCACGTCG	CGATTACCCGATAGGACGAA	TTTTAGTGTACTGAAGGTCTCCTGTGAGATGATTACTTAC	chrX:21741378-21741418	CCGTTAGTTAGTCCACGTCG
chrX_C4	CGATTACCCGATAGGACGAACTTTGTACTTTGTGATTTTAAACACACTGCTTCTGTAGTCCCGTTAGTTAGTCCACGTCG	CGATTACCCGATAGGACGAA	CTTTGTACTTTGTGATTTTAAACACACTGCTTCTGTAGTC	chrX:21741430-21741470	CCGTTAGTTAGTCCACGTCG
chrX_C4	CGATTACCCGATAGGACGAATAGGGAAATAAGTCAGTGAAGTTAAAAGCTAGTGTTACACCCGTTAGTTAGTCCACGTCG	CGATTACCCGATAGGACGAA	TAGGGAAATAAGTCAGTGAAGTTAAAAGCTAGTGTTACAC	chrX:21741498-21741538	CCGTTAGTTAGTCCACGTCG
chrX_C4	CGATTACCCGATAGGACGAATTAAAGTCCTCACTTACCTTACATATGTCACAAATTGGCCCCGTTAGTTAGTCCACGTCG	CGATTACCCGATAGGACGAA	TTAAAGTCCTCACTTACCTTACATATGTCACAAATTGGCC	chrX:21741540-21741580	CCGTTAGTTAGTCCACGTCG
chrX_C4	CGATTACCCGATAGGACGAAGGGTGATTGCTCAGTGACAAGATAAATGGCTATCACAGAGCCGTTAGTTAGTCCACGTCG	CGATTACCCGATAGGACGAA	GGGTGATTGCTCAGTGACAAGATAAATGGCTATCACAGAG	chrX:21741582-21741622	CCGTTAGTTAGTCCACGTCG
chrX_C4	CGATTACCCGATAGGACGAATGTAGGTTCAATTCTCAGCACCAAGGTTACTAATACCATCCCGTTAGTTAGTCCACGTCG	CGATTACCCGATAGGACGAA	TGTAGGTTCAATTCTCAGCACCAAGGTTACTAATACCATC	chrX:21741624-21741664	CCGTTAGTTAGTCCACGTCG
chrX_C4	CGATTACCCGATAGGACGAAGTTCCATGAAACCCGATGTCCTCTTCTGACCTCTATGATACCGTTAGTTAGTCCACGTCG	CGATTACCCGATAGGACGAA	GTTCCATGAAACCCGATGTCCTCTTCTGACCTCTATGATA	chrX:21741674-21741714	CCGTTAGTTAGTCCACGTCG
chrX_C4	CGATTACCCGATAGGACGAACACAGGCAGAAAACACCCATACCCATAAAATAAAATGAATCCGTTAGTTAGTCCACGTCG	CGATTACCCGATAGGACGAA	CACAGGCAGAAAACACCCATACCCATAAAATAAAATGAAT	chrX:21741738-21741778	CCGTTAGTTAGTCCACGTCG
chrX_C4	CGATTACCCGATAGGACGAACCAAAGAAGTTCCACAAATATGTAGGAAAATGACTGTATGCCGTTAGTTAGTCCACGTCG	CGATTACCCGATAGGACGAA	CCAAAGAAGTTCCACAAATATGTAGGAAAATGACTGTATG	chrX:21741790-21741830	CCGTTAGTTAGTCCACGTCG
chrX_C4	CGATTACCCGATAGGACGAATTCTATGTAAGCTTTGCAGTTGTACTCTTTAGTTAGAGTGCCGTTAGTTAGTCCACGTCG	CGATTACCCGATAGGACGAA	TTCTATGTAAGCTTTGCAGTTGTACTCTTTAGTTAGAGTG	chrX:21741906-21741946	CCGTTAGTTAGTCCACGTCG
chrX_C4	CGATTACCCGATAGGACGAAAAAATGAGGAACAGGTATCCAGACAGTGATAAACCTAGGACCGTTAGTTAGTCCACGTCG	CGATTACCCGATAGGACGAA	AAAATGAGGAACAGGTATCCAGACAGTGATAAACCTAGGA	chrX:21741956-21741996	CCGTTAGTTAGTCCACGTCG
chrX_C4	CGATTACCCGATAGGACGAACAAGTAGTTCATTACGTTCTCTGGATTCTAGATTCAATTGCCGTTAGTTAGTCCACGTCG	CGATTACCCGATAGGACGAA	CAAGTAGTTCATTACGTTCTCTGGATTCTAGATTCAATTG	chrX:21742109-21742149	CCGTTAGTTAGTCCACGTCG
chrX_C4	CGATTACCCGATAGGACGAACTGAAATTTTAGGTATCATTTTCTGTGGATGTGGATTTGCCCGTTAGTTAGTCCACGTCG	CGATTACCCGATAGGACGAA	CTGAAATTTTAGGTATCATTTTCTGTGGATGTGGATTTGC	chrX:21742485-21742525	CCGTTAGTTAGTCCACGTCG
chrX_C4	CGATTACCCGATAGGACGAAGAACCATCATCTCAATGGTTCACAAATAAGATGAACTTTGCCGTTAGTTAGTCCACGTCG	CGATTACCCGATAGGACGAA	GAACCATCATCTCAATGGTTCACAAATAAGATGAACTTTG	chrX:21742603-21742643	CCGTTAGTTAGTCCACGTCG
chrX_C4	CGATTACCCGATAGGACGAAGATACATTGAAGGCTTTCCTTGTGGATCGATACAATGCTGCCGTTAGTTAGTCCACGTCG	CGATTACCCGATAGGACGAA	GATACATTGAAGGCTTTCCTTGTGGATCGATACAATGCTG	chrX:21742645-21742685	CCGTTAGTTAGTCCACGTCG
chrX_C4	CGATTACCCGATAGGACGAAAGCAAGGATAGGGAGATTAAATCCTAGCTAGATGTTATTTCCGTTAGTTAGTCCACGTCG	CGATTACCCGATAGGACGAA	AGCAAGGATAGGGAGATTAAATCCTAGCTAGATGTTATTT	chrX:21742687-21742727	CCGTTAGTTAGTCCACGTCG
chrX_C4	CGATTACCCGATAGGACGAAACTTTGCATTGCAATTCAAATCATATTAAAGCTTGCTCCCCCGTTAGTTAGTCCACGTCG	CGATTACCCGATAGGACGAA	ACTTTGCATTGCAATTCAAATCATATTAAAGCTTGCTCCC	chrX:21742775-21742815	CCGTTAGTTAGTCCACGTCG
chrX_C4	CGATTACCCGATAGGACGAATTTCAGGGTTGTACTTTTCACCAATGAAATATATGCATGCCCGTTAGTTAGTCCACGTCG	CGATTACCCGATAGGACGAA	TTTCAGGGTTGTACTTTTCACCAATGAAATATATGCATGC	chrX:21742833-21742873	CCGTTAGTTAGTCCACGTCG
chrX_C4	CGATTACCCGATAGGACGAATTTGTGGAGGTAAATCTATGGAGATAATTTGGGCAGGGAGCCGTTAGTTAGTCCACGTCG	CGATTACCCGATAGGACGAA	TTTGTGGAGGTAAATCTATGGAGATAATTTGGGCAGGGAG	chrX:21742875-21742915	CCGTTAGTTAGTCCACGTCG
chrX_C4	CGATTACCCGATAGGACGAATTTTCAGAAGCTGGTTAGAAGGAGTAGTTACAGACTTGTACCGTTAGTTAGTCCACGTCG	CGATTACCCGATAGGACGAA	TTTTCAGAAGCTGGTTAGAAGGAGTAGTTACAGACTTGTA	chrX:21742937-21742977	CCGTTAGTTAGTCCACGTCG
chrX_C4	CGATTACCCGATAGGACGAATCACCATTTTAATTTATGGCAAACATGTATTACAGGCTGGCCGTTAGTTAGTCCACGTCG	CGATTACCCGATAGGACGAA	TCACCATTTTAATTTATGGCAAACATGTATTACAGGCTGG	chrX:21743012-21743052	CCGTTAGTTAGTCCACGTCG
chrX_C4	CGATTACCCGATAGGACGAAATAATAATAGTAAGCAGTCACCAGCATAATAGACAACAGCCCGTTAGTTAGTCCACGTCG	CGATTACCCGATAGGACGAA	ATAATAATAGTAAGCAGTCACCAGCATAATAGACAACAGC	chrX:21743086-21743126	CCGTTAGTTAGTCCACGTCG
chrX_C4	CGATTACCCGATAGGACGAACATGTAATTCCTCTCCCTTTGAGGATACTTGTAAGACAAACCGTTAGTTAGTCCACGTCG	CGATTACCCGATAGGACGAA	CATGTAATTCCTCTCCCTTTGAGGATACTTGTAAGACAAA	chrX:21743128-21743168	CCGTTAGTTAGTCCACGTCG
chrX_C4	CGATTACCCGATAGGACGAAATTAACCAATGCCCATACTTGATTCTTAAAACAGAATGCCCCGTTAGTTAGTCCACGTCG	CGATTACCCGATAGGACGAA	ATTAACCAATGCCCATACTTGATTCTTAAAACAGAATGCC	chrX:21743367-21743407	CCGTTAGTTAGTCCACGTCG
chrX_C4	CGATTACCCGATAGGACGAAGGAAGCAATAAATGTCTGTAAGCTGAATCTGACACCCACACCGTTAGTTAGTCCACGTCG	CGATTACCCGATAGGACGAA	GGAAGCAATAAATGTCTGTAAGCTGAATCTGACACCCACA	chrX:21743409-21743449	CCGTTAGTTAGTCCACGTCG
chrX_C4	CGATTACCCGATAGGACGAATTTTATGTTGCCACAAACAACTGCATAGCATCAGTGTTTTCCGTTAGTTAGTCCACGTCG	CGATTACCCGATAGGACGAA	TTTTATGTTGCCACAAACAACTGCATAGCATCAGTGTTTT	chrX:21743468-21743508	CCGTTAGTTAGTCCACGTCG
chrX_C4	CGATTACCCGATAGGACGAATTGTTACCATCGCTGTCAGAATCCTTGTCTGGCTTTCGAGCCGTTAGTTAGTCCACGTCG	CGATTACCCGATAGGACGAA	TTGTTACCATCGCTGTCAGAATCCTTGTCTGGCTTTCGAG	chrX:21743510-21743550	CCGTTAGTTAGTCCACGTCG
chrX_C4	CGATTACCCGATAGGACGAAGGTTTCTTGATGATTTTCACGCAATCATACAGGCCTTTTACCGTTAGTTAGTCCACGTCG	CGATTACCCGATAGGACGAA	GGTTTCTTGATGATTTTCACGCAATCATACAGGCCTTTTA	chrX:21743552-21743592	CCGTTAGTTAGTCCACGTCG
chrX_C4	CGATTACCCGATAGGACGAAATCATAAACTGTTCTAGTTTGTCTACCTTGCTGTTGAGTGCCGTTAGTTAGTCCACGTCG	CGATTACCCGATAGGACGAA	ATCATAAACTGTTCTAGTTTGTCTACCTTGCTGTTGAGTG	chrX:21743594-21743634	CCGTTAGTTAGTCCACGTCG
chrX_C4	CGATTACCCGATAGGACGAATTTTACCAGGACCACGTCGAACACCACTGGCTAAAAGTATCCGTTAGTTAGTCCACGTCG	CGATTACCCGATAGGACGAA	TTTTACCAGGACCACGTCGAACACCACTGGCTAAAAGTAT	chrX:21743658-21743698	CCGTTAGTTAGTCCACGTCG
chrX_C4	CGATTACCCGATAGGACGAAGGTTGATGCTAAGTGGAACGAAGGGAATGTGGTTTCGAATCCGTTAGTTAGTCCACGTCG	CGATTACCCGATAGGACGAA	GGTTGATGCTAAGTGGAACGAAGGGAATGTGGTTTCGAAT	chrX:21743700-21743740	CCGTTAGTTAGTCCACGTCG
chrX_C4	CGATTACCCGATAGGACGAAGTAAATAGAATTATACTGTTGTGATTTATCAGAGCCTGGCCCGTTAGTTAGTCCACGTCG	CGATTACCCGATAGGACGAA	GTAAATAGAATTATACTGTTGTGATTTATCAGAGCCTGGC	chrX:21743802-21743842	CCGTTAGTTAGTCCACGTCG
chrX_C4	CGATTACCCGATAGGACGAAATCCTAGATCCCATCTCATGCCATTTTAGTTATAAACCCACCGTTAGTTAGTCCACGTCG	CGATTACCCGATAGGACGAA	ATCCTAGATCCCATCTCATGCCATTTTAGTTATAAACCCA	chrX:21743844-21743884	CCGTTAGTTAGTCCACGTCG
chrX_C4	CGATTACCCGATAGGACGAATGAGTCACACTAAGACCTAGAGATTAGAAATGTTTTGAAGCCGTTAGTTAGTCCACGTCG	CGATTACCCGATAGGACGAA	TGAGTCACACTAAGACCTAGAGATTAGAAATGTTTTGAAG	chrX:21743886-21743926	CCGTTAGTTAGTCCACGTCG
chrX_C4	CGATTACCCGATAGGACGAATTCACAAGTGTGTTTTACTTATATATAGATTGGGTGGTGGCCGTTAGTTAGTCCACGTCG	CGATTACCCGATAGGACGAA	TTCACAAGTGTGTTTTACTTATATATAGATTGGGTGGTGG	chrX:21743937-21743977	CCGTTAGTTAGTCCACGTCG
chrX_C4	CGATTACCCGATAGGACGAAGTGGAGCTCAAAGAAGTTGCCTTGTTATCCAAAGTGCTATCCGTTAGTTAGTCCACGTCG	CGATTACCCGATAGGACGAA	GTGGAGCTCAAAGAAGTTGCCTTGTTATCCAAAGTGCTAT	chrX:21743979-21744019	CCGTTAGTTAGTCCACGTCG
chrX_C4	CGATTACCCGATAGGACGAATTTACATAAATTTTCCGGGAAGTCCAGTAGTAGCTTTTACCCGTTAGTTAGTCCACGTCG	CGATTACCCGATAGGACGAA	TTTACATAAATTTTCCGGGAAGTCCAGTAGTAGCTTTTAC	chrX:21744022-21744062	CCGTTAGTTAGTCCACGTCG
chrX_C4	CGATTACCCGATAGGACGAACCTTGACTTTTATGTAAAAGCACTTCACTGAAACTTTAGCCCGTTAGTTAGTCCACGTCG	CGATTACCCGATAGGACGAA	CCTTGACTTTTATGTAAAAGCACTTCACTGAAACTTTAGC	chrX:21744068-21744108	CCGTTAGTTAGTCCACGTCG
chrX_C4	CGATTACCCGATAGGACGAACCTGAAATAACTGAGTATACATAGTTTCTACTTTGCAAGCCCGTTAGTTAGTCCACGTCG	CGATTACCCGATAGGACGAA	CCTGAAATAACTGAGTATACATAGTTTCTACTTTGCAAGC	chrX:21744120-21744160	CCGTTAGTTAGTCCACGTCG
chrX_C4	CGATTACCCGATAGGACGAAATAAAATAAAATAACAGGATCATGGTGGCCATTCATGCAGCCGTTAGTTAGTCCACGTCG	CGATTACCCGATAGGACGAA	ATAAAATAAAATAACAGGATCATGGTGGCCATTCATGCAG	chrX:21744171-21744211	CCGTTAGTTAGTCCACGTCG
chrX_C4	CGATTACCCGATAGGACGAAGCCTATAATGGTAATTATACATATGTAACTGAATGGAGCCCCGTTAGTTAGTCCACGTCG	CGATTACCCGATAGGACGAA	GCCTATAATGGTAATTATACATATGTAACTGAATGGAGCC	chrX:21744213-21744253	CCGTTAGTTAGTCCACGTCG
chrX_C4	CGATTACCCGATAGGACGAAAAAGAAAACAGGATAGATTTTGCAATGGGTTGACTTAGAGCCGTTAGTTAGTCCACGTCG	CGATTACCCGATAGGACGAA	AAAGAAAACAGGATAGATTTTGCAATGGGTTGACTTAGAG	chrX:21744265-21744305	CCGTTAGTTAGTCCACGTCG
chrX_C4	CGATTACCCGATAGGACGAAAAAATGAGAGAAGAGGGATTAATTCCTAGGAGGGGAGTGGCCGTTAGTTAGTCCACGTCG	CGATTACCCGATAGGACGAA	AAAATGAGAGAAGAGGGATTAATTCCTAGGAGGGGAGTGG	chrX:21744315-21744355	CCGTTAGTTAGTCCACGTCG
chrX_C4	CGATTACCCGATAGGACGAATTTTAACATGAGATAATGATAGTGGGGAACAGCAGCTTTTCCGTTAGTTAGTCCACGTCG	CGATTACCCGATAGGACGAA	TTTTAACATGAGATAATGATAGTGGGGAACAGCAGCTTTT	chrX:21744459-21744499	CCGTTAGTTAGTCCACGTCG
chrX_C4	CGATTACCCGATAGGACGAACTCTTCTGTTCTCATGTTGTGTGTGAGAGGATCGCTGGATCCGTTAGTTAGTCCACGTCG	CGATTACCCGATAGGACGAA	CTCTTCTGTTCTCATGTTGTGTGTGAGAGGATCGCTGGAT	chrX:21744501-21744541	CCGTTAGTTAGTCCACGTCG
chrX_C4	CGATTACCCGATAGGACGAACCAATCAAATTATTAGTGACCTATGTCCATCTTCTAACTGCCGTTAGTTAGTCCACGTCG	CGATTACCCGATAGGACGAA	CCAATCAAATTATTAGTGACCTATGTCCATCTTCTAACTG	chrX:21744543-21744583	CCGTTAGTTAGTCCACGTCG
chrX_C4	CGATTACCCGATAGGACGAACACAACTATTGAATACAGTGGTGAATCCTGGGAAGCCCATCCGTTAGTTAGTCCACGTCG	CGATTACCCGATAGGACGAA	CACAACTATTGAATACAGTGGTGAATCCTGGGAAGCCCAT	chrX:21744585-21744625	CCGTTAGTTAGTCCACGTCG
chrX_C4	CGATTACCCGATAGGACGAAGAAAGAAACATGAAATGTCCAAATTCTAGGGAGGGCAGCGCCGTTAGTTAGTCCACGTCG	CGATTACCCGATAGGACGAA	GAAAGAAACATGAAATGTCCAAATTCTAGGGAGGGCAGCG	chrX:21744627-21744667	CCGTTAGTTAGTCCACGTCG
chrX_C4	CGATTACCCGATAGGACGAAATTTGATGCTCTTACCTTGGTTCCTTTCCCCTCTCTGTTCCCGTTAGTTAGTCCACGTCG	CGATTACCCGATAGGACGAA	ATTTGATGCTCTTACCTTGGTTCCTTTCCCCTCTCTGTTC	chrX:21744669-21744709	CCGTTAGTTAGTCCACGTCG
chrX_C4	CGATTACCCGATAGGACGAACCCCTGCTTCTTATAAAGAGAAGCCCATCCCCATATTCAGCCGTTAGTTAGTCCACGTCG	CGATTACCCGATAGGACGAA	CCCCTGCTTCTTATAAAGAGAAGCCCATCCCCATATTCAG	chrX:21744823-21744863	CCGTTAGTTAGTCCACGTCG
chrX_C4	CGATTACCCGATAGGACGAAGTTTAATCTTAGGGAAGTCAAATCTTAACTTACCTGGAACCCGTTAGTTAGTCCACGTCG	CGATTACCCGATAGGACGAA	GTTTAATCTTAGGGAAGTCAAATCTTAACTTACCTGGAAC	chrX:21744866-21744906	CCGTTAGTTAGTCCACGTCG
chrX_C4	CGATTACCCGATAGGACGAAACGATATAATTAAGATAAGGAGAGAACAGCTCACTATGAGCCGTTAGTTAGTCCACGTCG	CGATTACCCGATAGGACGAA	ACGATATAATTAAGATAAGGAGAGAACAGCTCACTATGAG	chrX:21744919-21744959	CCGTTAGTTAGTCCACGTCG
chrX_C4	CGATTACCCGATAGGACGAATGAGGTTTACGTTTATCATGGTTGGTTGTTTAATGATGTCCCGTTAGTTAGTCCACGTCG	CGATTACCCGATAGGACGAA	TGAGGTTTACGTTTATCATGGTTGGTTGTTTAATGATGTC	chrX:21744964-21745004	CCGTTAGTTAGTCCACGTCG
chrX_C4	CGATTACCCGATAGGACGAACTTAATAGGAGGAAGATGTATTAGCAGTAGCAGCAAGGGCCCGTTAGTTAGTCCACGTCG	CGATTACCCGATAGGACGAA	CTTAATAGGAGGAAGATGTATTAGCAGTAGCAGCAAGGGC	chrX:21745006-21745046	CCGTTAGTTAGTCCACGTCG
chrX_C4	CGATTACCCGATAGGACGAACAGCCAGACCAAACAGAGTCTGGTTTCAAGGAGGGTACTTCCGTTAGTTAGTCCACGTCG	CGATTACCCGATAGGACGAA	CAGCCAGACCAAACAGAGTCTGGTTTCAAGGAGGGTACTT	chrX:21745048-21745088	CCGTTAGTTAGTCCACGTCG
chrX_C4	CGATTACCCGATAGGACGAATACAGTGCCTGGTGATAAGTGGCATGAGTTGCCTGGAGCCCCGTTAGTTAGTCCACGTCG	CGATTACCCGATAGGACGAA	TACAGTGCCTGGTGATAAGTGGCATGAGTTGCCTGGAGCC	chrX:21745090-21745130	CCGTTAGTTAGTCCACGTCG
chrX_C4	CGATTACCCGATAGGACGAAGCCTTATATACTGCAGTTGAAGTCATGGCTCCTCATTGTCCCGTTAGTTAGTCCACGTCG	CGATTACCCGATAGGACGAA	GCCTTATATACTGCAGTTGAAGTCATGGCTCCTCATTGTC	chrX:21745132-21745172	CCGTTAGTTAGTCCACGTCG
chrX_C4	CGATTACCCGATAGGACGAACACAAGTGCAGCCTCATAATTAGGGTCCTCTCTCTGGCAACCGTTAGTTAGTCCACGTCG	CGATTACCCGATAGGACGAA	CACAAGTGCAGCCTCATAATTAGGGTCCTCTCTCTGGCAA	chrX:21745174-21745214	CCGTTAGTTAGTCCACGTCG
chrX_C4	CGATTACCCGATAGGACGAACCATCCTGGATAGCAGGAAGACTGGTGTGCCCTAGTAACTCCGTTAGTTAGTCCACGTCG	CGATTACCCGATAGGACGAA	CCATCCTGGATAGCAGGAAGACTGGTGTGCCCTAGTAACT	chrX:21745216-21745256	CCGTTAGTTAGTCCACGTCG
chrX_C4	CGATTACCCGATAGGACGAAAAAAGAATTGGGAGGTTGGGGTTGAATTCCATCAGAATGACCGTTAGTTAGTCCACGTCG	CGATTACCCGATAGGACGAA	AAAAGAATTGGGAGGTTGGGGTTGAATTCCATCAGAATGA	chrX:21745294-21745334	CCGTTAGTTAGTCCACGTCG
chrX_C4	CGATTACCCGATAGGACGAACCCCTCCTTTGTTGCTTAACGATACATGTCTTTGTTACAACCGTTAGTTAGTCCACGTCG	CGATTACCCGATAGGACGAA	CCCCTCCTTTGTTGCTTAACGATACATGTCTTTGTTACAA	chrX:21745395-21745435	CCGTTAGTTAGTCCACGTCG
chrX_C4	CGATTACCCGATAGGACGAACCTGTTTGTTTCGTCTGATATCTTACATAATGGCAACTATCGTATAGGAGAGTAGTACGG	CGATTACCCGATAGGACGAA	CCTGTTTGTTTCGTCTGATATCTTACATAATGGCAACTAT	chrX:22494143-22494183	CGTATAGGAGAGTAGTACGG
chrX_C4	CGATTACCCGATAGGACGAACCAGATTGTTGTGTTTTGTATAAAAGAAAGAGAACCAAGGCGTATAGGAGAGTAGTACGG	CGATTACCCGATAGGACGAA	CCAGATTGTTGTGTTTTGTATAAAAGAAAGAGAACCAAGG	chrX:22494188-22494228	CGTATAGGAGAGTAGTACGG
chrX_C4	CGATTACCCGATAGGACGAACCCTATCCCCTGAGGTACCAGCCACAGATGGGCATGGAAGCGTATAGGAGAGTAGTACGG	CGATTACCCGATAGGACGAA	CCCTATCCCCTGAGGTACCAGCCACAGATGGGCATGGAAG	chrX:22494295-22494335	CGTATAGGAGAGTAGTACGG
chrX_C4	CGATTACCCGATAGGACGAAGATAGAGAAATACAGAGAGAGTGGGATGGAGGGCAGCCAGCGTATAGGAGAGTAGTACGG	CGATTACCCGATAGGACGAA	GATAGAGAAATACAGAGAGAGTGGGATGGAGGGCAGCCAG	chrX:22494356-22494396	CGTATAGGAGAGTAGTACGG
chrX_C4	CGATTACCCGATAGGACGAAACATGTGGAGAAAGAGAGGGGTAGGGAGGGAGAAGGAGAACGTATAGGAGAGTAGTACGG	CGATTACCCGATAGGACGAA	ACATGTGGAGAAAGAGAGGGGTAGGGAGGGAGAAGGAGAA	chrX:22494398-22494438	CGTATAGGAGAGTAGTACGG
chrX_C4	CGATTACCCGATAGGACGAACAGCCTATTTTATAGTAACCTGGGCATACCTAGCTGTTCACGTATAGGAGAGTAGTACGG	CGATTACCCGATAGGACGAA	CAGCCTATTTTATAGTAACCTGGGCATACCTAGCTGTTCA	chrX:22494470-22494510	CGTATAGGAGAGTAGTACGG
chrX_C4	CGATTACCCGATAGGACGAAGTGGGGCTGAGCCTAGAAGGAATGCTAATACAGATTCAAACGTATAGGAGAGTAGTACGG	CGATTACCCGATAGGACGAA	GTGGGGCTGAGCCTAGAAGGAATGCTAATACAGATTCAAA	chrX:22494521-22494561	CGTATAGGAGAGTAGTACGG
chrX_C4	CGATTACCCGATAGGACGAAAAAACATGACAACATCAACTGACATATTTGACAGGAGTCACGTATAGGAGAGTAGTACGG	CGATTACCCGATAGGACGAA	AAAACATGACAACATCAACTGACATATTTGACAGGAGTCA	chrX:22494581-22494621	CGTATAGGAGAGTAGTACGG
chrX_C4	CGATTACCCGATAGGACGAAAAAAGAGCACACTTTTCATCAAGCAGTTAGAATAGAAGTCCGTATAGGAGAGTAGTACGG	CGATTACCCGATAGGACGAA	AAAAGAGCACACTTTTCATCAAGCAGTTAGAATAGAAGTC	chrX:22494652-22494692	CGTATAGGAGAGTAGTACGG
chrX_C4	CGATTACCCGATAGGACGAAGGGTTAAGTAAAAGACAGCTGTTCACAAAAGTCAGACAAGCGTATAGGAGAGTAGTACGG	CGATTACCCGATAGGACGAA	GGGTTAAGTAAAAGACAGCTGTTCACAAAAGTCAGACAAG	chrX:22494694-22494734	CGTATAGGAGAGTAGTACGG
chrX_C4	CGATTACCCGATAGGACGAATAACAAGGGTTATATAGTTAAATGGAACTTGGGAAGTCAGCGTATAGGAGAGTAGTACGG	CGATTACCCGATAGGACGAA	TAACAAGGGTTATATAGTTAAATGGAACTTGGGAAGTCAG	chrX:22494738-22494778	CGTATAGGAGAGTAGTACGG
chrX_C4	CGATTACCCGATAGGACGAAATGAGACAGAGGTGTTCTCAGATAGGGAAACCTGGGAGTGCGTATAGGAGAGTAGTACGG	CGATTACCCGATAGGACGAA	ATGAGACAGAGGTGTTCTCAGATAGGGAAACCTGGGAGTG	chrX:22494780-22494820	CGTATAGGAGAGTAGTACGG
chrX_C4	CGATTACCCGATAGGACGAAATTATTTCACTTGCTACTTGAAATTAAAGGTGGGAAGCAGCGTATAGGAGAGTAGTACGG	CGATTACCCGATAGGACGAA	ATTATTTCACTTGCTACTTGAAATTAAAGGTGGGAAGCAG	chrX:22494907-22494947	CGTATAGGAGAGTAGTACGG
chrX_C4	CGATTACCCGATAGGACGAATTACAGGAAATCACCTGAGTGATTACTTGTTTACAACCCCCGTATAGGAGAGTAGTACGG	CGATTACCCGATAGGACGAA	TTACAGGAAATCACCTGAGTGATTACTTGTTTACAACCCC	chrX:22494949-22494989	CGTATAGGAGAGTAGTACGG
chrX_C4	CGATTACCCGATAGGACGAAACATATGATTAGCCCCAGAGCTGTTCTCTACACTTTTATACGTATAGGAGAGTAGTACGG	CGATTACCCGATAGGACGAA	ACATATGATTAGCCCCAGAGCTGTTCTCTACACTTTTATA	chrX:22494991-22495031	CGTATAGGAGAGTAGTACGG
chrX_C4	CGATTACCCGATAGGACGAATATGGAGTATAGGGGTTTTCAAATACAAAGAGAAGGAAAGCGTATAGGAGAGTAGTACGG	CGATTACCCGATAGGACGAA	TATGGAGTATAGGGGTTTTCAAATACAAAGAGAAGGAAAG	chrX:22495071-22495111	CGTATAGGAGAGTAGTACGG
chrX_C4	CGATTACCCGATAGGACGAATGATGGATTTCTTTTCACTGTTGCAAACATTACTAGACTCCGTATAGGAGAGTAGTACGG	CGATTACCCGATAGGACGAA	TGATGGATTTCTTTTCACTGTTGCAAACATTACTAGACTC	chrX:22495132-22495172	CGTATAGGAGAGTAGTACGG
chrX_C4	CGATTACCCGATAGGACGAAAAAATGACAGGTAATTTGCCTTTTCAGCCCTGGAAGAAGACGTATAGGAGAGTAGTACGG	CGATTACCCGATAGGACGAA	AAAATGACAGGTAATTTGCCTTTTCAGCCCTGGAAGAAGA	chrX:22495201-22495241	CGTATAGGAGAGTAGTACGG
chrX_C4	CGATTACCCGATAGGACGAAATCAGTGAAAGTAAATTTACAGGGAACACTATTAGCATGGCGTATAGGAGAGTAGTACGG	CGATTACCCGATAGGACGAA	ATCAGTGAAAGTAAATTTACAGGGAACACTATTAGCATGG	chrX:22495339-22495379	CGTATAGGAGAGTAGTACGG
chrX_C4	CGATTACCCGATAGGACGAATTCCAAACTCAATCCAGGATAACAAAGGCATACTGTAAAACGTATAGGAGAGTAGTACGG	CGATTACCCGATAGGACGAA	TTCCAAACTCAATCCAGGATAACAAAGGCATACTGTAAAA	chrX:22495381-22495421	CGTATAGGAGAGTAGTACGG
chrX_C4	CGATTACCCGATAGGACGAAAAAGACTGTGAGAATAAAACTCATTGAGGAAGCAATGAAGCGTATAGGAGAGTAGTACGG	CGATTACCCGATAGGACGAA	AAAGACTGTGAGAATAAAACTCATTGAGGAAGCAATGAAG	chrX:22495427-22495467	CGTATAGGAGAGTAGTACGG
chrX_C4	CGATTACCCGATAGGACGAAAGGGCAGAAAGCCACATGGACAGAAAAGACAAAATTGGGTCGTATAGGAGAGTAGTACGG	CGATTACCCGATAGGACGAA	AGGGCAGAAAGCCACATGGACAGAAAAGACAAAATTGGGT	chrX:22495469-22495509	CGTATAGGAGAGTAGTACGG
chrX_C4	CGATTACCCGATAGGACGAAATGATGGAGACACAATTGAAACCCAGAAACTCAGTGTGCTCGTATAGGAGAGTAGTACGG	CGATTACCCGATAGGACGAA	ATGATGGAGACACAATTGAAACCCAGAAACTCAGTGTGCT	chrX:22495511-22495551	CGTATAGGAGAGTAGTACGG
chrX_C4	CGATTACCCGATAGGACGAATTCTATTCTACTGAGTGAAGACACATTGTGTACTGCTTATCGTATAGGAGAGTAGTACGG	CGATTACCCGATAGGACGAA	TTCTATTCTACTGAGTGAAGACACATTGTGTACTGCTTAT	chrX:22495553-22495593	CGTATAGGAGAGTAGTACGG
chrX_C4	CGATTACCCGATAGGACGAAAAAAGAGAAGGGTTAGCTAATCTTGATTGGAGGTGTTAGGCGTATAGGAGAGTAGTACGG	CGATTACCCGATAGGACGAA	AAAAGAGAAGGGTTAGCTAATCTTGATTGGAGGTGTTAGG	chrX:22495627-22495667	CGTATAGGAGAGTAGTACGG
chrX_C4	CGATTACCCGATAGGACGAAGTCTCAGCAGGGGTGCAGTCTCAGGCTGTGAACATCAGAACGTATAGGAGAGTAGTACGG	CGATTACCCGATAGGACGAA	GTCTCAGCAGGGGTGCAGTCTCAGGCTGTGAACATCAGAA	chrX:22495669-22495709	CGTATAGGAGAGTAGTACGG
chrX_C4	CGATTACCCGATAGGACGAAGAGGCAGCTGTGGTCTGTGCTTTCTGATTTGCACTGTAAACGTATAGGAGAGTAGTACGG	CGATTACCCGATAGGACGAA	GAGGCAGCTGTGGTCTGTGCTTTCTGATTTGCACTGTAAA	chrX:22495711-22495751	CGTATAGGAGAGTAGTACGG
chrX_C4	CGATTACCCGATAGGACGAATCTGCTCAAGGACCAGAGGGAGGCTTTGTGGTTTCCCTGACGTATAGGAGAGTAGTACGG	CGATTACCCGATAGGACGAA	TCTGCTCAAGGACCAGAGGGAGGCTTTGTGGTTTCCCTGA	chrX:22495753-22495793	CGTATAGGAGAGTAGTACGG
chrX_C4	CGATTACCCGATAGGACGAACTGAGCAGAAGAAAGCTTCAGCATTCCCTGACATCTGAGGCGTATAGGAGAGTAGTACGG	CGATTACCCGATAGGACGAA	CTGAGCAGAAGAAAGCTTCAGCATTCCCTGACATCTGAGG	chrX:22495795-22495835	CGTATAGGAGAGTAGTACGG
chrX_C4	CGATTACCCGATAGGACGAATTGCATTCTTTTACTTGGTGTGTCCCTGTCAACACAAATTCGTATAGGAGAGTAGTACGG	CGATTACCCGATAGGACGAA	TTGCATTCTTTTACTTGGTGTGTCCCTGTCAACACAAATT	chrX:22495837-22495877	CGTATAGGAGAGTAGTACGG
chrX_C4	CGATTACCCGATAGGACGAAACCTTATGGAAAATGATTCTGATTATTAGATCCAGGGTAGCGTATAGGAGAGTAGTACGG	CGATTACCCGATAGGACGAA	ACCTTATGGAAAATGATTCTGATTATTAGATCCAGGGTAG	chrX:22495901-22495941	CGTATAGGAGAGTAGTACGG
chrX_C4	CGATTACCCGATAGGACGAAGGGGAAAGTCTTGACTCTACATTGACCAGTATGGCAGGCACGTATAGGAGAGTAGTACGG	CGATTACCCGATAGGACGAA	GGGGAAAGTCTTGACTCTACATTGACCAGTATGGCAGGCA	chrX:22496003-22496043	CGTATAGGAGAGTAGTACGG
chrX_C4	CGATTACCCGATAGGACGAAACACATATGATTATTGAGCACTTGGGATCTGACTAGTACCCGTATAGGAGAGTAGTACGG	CGATTACCCGATAGGACGAA	ACACATATGATTATTGAGCACTTGGGATCTGACTAGTACC	chrX:22496045-22496085	CGTATAGGAGAGTAGTACGG
chrX_C4	CGATTACCCGATAGGACGAAATTATATGACTAATGGAAAAGGCAAAGTTCCATGTGTAGCCGTATAGGAGAGTAGTACGG	CGATTACCCGATAGGACGAA	ATTATATGACTAATGGAAAAGGCAAAGTTCCATGTGTAGC	chrX:22496313-22496353	CGTATAGGAGAGTAGTACGG
chrX_C4	CGATTACCCGATAGGACGAACTCATTACCTGTTGTGAACATCTTTTCCCAACAGGCAACACGTATAGGAGAGTAGTACGG	CGATTACCCGATAGGACGAA	CTCATTACCTGTTGTGAACATCTTTTCCCAACAGGCAACA	chrX:22496355-22496395	CGTATAGGAGAGTAGTACGG
chrX_C4	CGATTACCCGATAGGACGAATCTGTCCTAGCCTCATTCTCTTGGGGTCCTACCTGTTCTTCGTATAGGAGAGTAGTACGG	CGATTACCCGATAGGACGAA	TCTGTCCTAGCCTCATTCTCTTGGGGTCCTACCTGTTCTT	chrX:22496397-22496437	CGTATAGGAGAGTAGTACGG
chrX_C4	CGATTACCCGATAGGACGAATCCCAAGAACTCACCCATGCATGAGTTTGTGTGTGTGTGTCGTATAGGAGAGTAGTACGG	CGATTACCCGATAGGACGAA	TCCCAAGAACTCACCCATGCATGAGTTTGTGTGTGTGTGT	chrX:22496439-22496479	CGTATAGGAGAGTAGTACGG
chrX_C4	CGATTACCCGATAGGACGAAGTGACCATAATTTTAAAAGAAGAGGTCCTGAATGAGAAGACGTATAGGAGAGTAGTACGG	CGATTACCCGATAGGACGAA	GTGACCATAATTTTAAAAGAAGAGGTCCTGAATGAGAAGA	chrX:22496481-22496521	CGTATAGGAGAGTAGTACGG
chrX_C4	CGATTACCCGATAGGACGAAGGGGTAGTGGGAATACTAGGAGTTAGAGGGAAGAGATAAACGTATAGGAGAGTAGTACGG	CGATTACCCGATAGGACGAA	GGGGTAGTGGGAATACTAGGAGTTAGAGGGAAGAGATAAA	chrX:22496527-22496567	CGTATAGGAGAGTAGTACGG
chrX_C4	CGATTACCCGATAGGACGAATTCAAGAATAAAAGGGCAAAGAAATAGGCACAATGAGTTCCGTATAGGAGAGTAGTACGG	CGATTACCCGATAGGACGAA	TTCAAGAATAAAAGGGCAAAGAAATAGGCACAATGAGTTC	chrX:22496626-22496666	CGTATAGGAGAGTAGTACGG
chrX_C4	CGATTACCCGATAGGACGAAGTAAATAAAAGCATTAGATGCCCACTTCCTGCAATATAAGCGTATAGGAGAGTAGTACGG	CGATTACCCGATAGGACGAA	GTAAATAAAAGCATTAGATGCCCACTTCCTGCAATATAAG	chrX:22496688-22496728	CGTATAGGAGAGTAGTACGG
chrX_C4	CGATTACCCGATAGGACGAATGCTTATAGAAGTTTGTCAATGGACATACTACTTTTCACCCGTATAGGAGAGTAGTACGG	CGATTACCCGATAGGACGAA	TGCTTATAGAAGTTTGTCAATGGACATACTACTTTTCACC	chrX:22496748-22496788	CGTATAGGAGAGTAGTACGG
chrX_C4	CGATTACCCGATAGGACGAAGAAGATCTATGCTGACAAGTGTGCTTTCTATATCTCTTTCCGTATAGGAGAGTAGTACGG	CGATTACCCGATAGGACGAA	GAAGATCTATGCTGACAAGTGTGCTTTCTATATCTCTTTC	chrX:22496790-22496830	CGTATAGGAGAGTAGTACGG
chrX_C4	CGATTACCCGATAGGACGAATTTTCAGGGATTTGGTGGTATTTTCAGCTCATGGTTCAAACGTATAGGAGAGTAGTACGG	CGATTACCCGATAGGACGAA	TTTTCAGGGATTTGGTGGTATTTTCAGCTCATGGTTCAAA	chrX:22496950-22496990	CGTATAGGAGAGTAGTACGG
chrX_C4	CGATTACCCGATAGGACGAATTAGGCTCTGCACTTCTGCTCTTATCTTTGAATTGGTGCTCGTATAGGAGAGTAGTACGG	CGATTACCCGATAGGACGAA	TTAGGCTCTGCACTTCTGCTCTTATCTTTGAATTGGTGCT	chrX:22496992-22497032	CGTATAGGAGAGTAGTACGG
chrX_C4	CGATTACCCGATAGGACGAATTGTCACCCAGTGCAATTACTATCCTGAAAAGCTAATGAACGTATAGGAGAGTAGTACGG	CGATTACCCGATAGGACGAA	TTGTCACCCAGTGCAATTACTATCCTGAAAAGCTAATGAA	chrX:22497034-22497074	CGTATAGGAGAGTAGTACGG
chrX_C4	CGATTACCCGATAGGACGAAATTGAACAAAAGTTTGCTGTAAGATTACTTACTGGCTTCCCGTATAGGAGAGTAGTACGG	CGATTACCCGATAGGACGAA	ATTGAACAAAAGTTTGCTGTAAGATTACTTACTGGCTTCC	chrX:22497106-22497146	CGTATAGGAGAGTAGTACGG
chrX_C4	CGATTACCCGATAGGACGAAATGAGAAACATTGGCTGGTGGAGTAAAGGGCAAGATAACCCGTATAGGAGAGTAGTACGG	CGATTACCCGATAGGACGAA	ATGAGAAACATTGGCTGGTGGAGTAAAGGGCAAGATAACC	chrX:22497148-22497188	CGTATAGGAGAGTAGTACGG
chrX_C4	CGATTACCCGATAGGACGAAACAACATCAAGTGATCTATGATCCCATTCGCCTTCACGCTCGTATAGGAGAGTAGTACGG	CGATTACCCGATAGGACGAA	ACAACATCAAGTGATCTATGATCCCATTCGCCTTCACGCT	chrX:22497190-22497230	CGTATAGGAGAGTAGTACGG
chrX_C4	CGATTACCCGATAGGACGAAACCCAAACTTCTGTCTGGTATTAGTATTTGAGTTACCACACGTATAGGAGAGTAGTACGG	CGATTACCCGATAGGACGAA	ACCCAAACTTCTGTCTGGTATTAGTATTTGAGTTACCACA	chrX:22497232-22497272	CGTATAGGAGAGTAGTACGG
chrX_C4	CGATTACCCGATAGGACGAATTCCAGACAAAAGTTACCTGATAATGACACAACTTTGGTGCGTATAGGAGAGTAGTACGG	CGATTACCCGATAGGACGAA	TTCCAGACAAAAGTTACCTGATAATGACACAACTTTGGTG	chrX:22497274-22497314	CGTATAGGAGAGTAGTACGG
chrX_C4	CGATTACCCGATAGGACGAAAAAATTCAAACTCCCTTCATTTGTTATATCCTGCCTTGGCCGTATAGGAGAGTAGTACGG	CGATTACCCGATAGGACGAA	AAAATTCAAACTCCCTTCATTTGTTATATCCTGCCTTGGC	chrX:22497331-22497371	CGTATAGGAGAGTAGTACGG
chrX_C4	CGATTACCCGATAGGACGAAGAACTGGCAGGCATAAATGTGCAGCATCTGAGGGAAGGACCGTATAGGAGAGTAGTACGG	CGATTACCCGATAGGACGAA	GAACTGGCAGGCATAAATGTGCAGCATCTGAGGGAAGGAC	chrX:22497373-22497413	CGTATAGGAGAGTAGTACGG
chrX_C4	CGATTACCCGATAGGACGAAAGCAATAAGGCCTCTCTCTGCTGAGCAATAATGGGGACTGCGTATAGGAGAGTAGTACGG	CGATTACCCGATAGGACGAA	AGCAATAAGGCCTCTCTCTGCTGAGCAATAATGGGGACTG	chrX:22497415-22497455	CGTATAGGAGAGTAGTACGG
chrX_C4	CGATTACCCGATAGGACGAATGGGGTCACATTCTGGTCACTTTCTGTTAAGGTATACCATCGTATAGGAGAGTAGTACGG	CGATTACCCGATAGGACGAA	TGGGGTCACATTCTGGTCACTTTCTGTTAAGGTATACCAT	chrX:22497457-22497497	CGTATAGGAGAGTAGTACGG
chrX_C4	CGATTACCCGATAGGACGAACACTTCAGTTTCTTCATTAGTTTTCTTGTTGTCCCTCTAACGTATAGGAGAGTAGTACGG	CGATTACCCGATAGGACGAA	CACTTCAGTTTCTTCATTAGTTTTCTTGTTGTCCCTCTAA	chrX:22497499-22497539	CGTATAGGAGAGTAGTACGG
chrX_C4	CGATTACCCGATAGGACGAAGAGTAAGATTCTGCCCTCCCCAAAACTATAAAATGACAAACGTATAGGAGAGTAGTACGG	CGATTACCCGATAGGACGAA	GAGTAAGATTCTGCCCTCCCCAAAACTATAAAATGACAAA	chrX:22497541-22497581	CGTATAGGAGAGTAGTACGG
chrX_C4	CGATTACCCGATAGGACGAACTGTTTACAATTTCAGCATAGCAAGCACAAAACTTGTCTCCGTATAGGAGAGTAGTACGG	CGATTACCCGATAGGACGAA	CTGTTTACAATTTCAGCATAGCAAGCACAAAACTTGTCTC	chrX:22497583-22497623	CGTATAGGAGAGTAGTACGG
chrX_C4	CGATTACCCGATAGGACGAATTGACTATGTTGGATGACATCCTTTGTGATTTGCTTTCCTCGTATAGGAGAGTAGTACGG	CGATTACCCGATAGGACGAA	TTGACTATGTTGGATGACATCCTTTGTGATTTGCTTTCCT	chrX:22497625-22497665	CGTATAGGAGAGTAGTACGG
chrX_C4	CGATTACCCGATAGGACGAAAGTGTTAGGTTGCCAGATTCCAGATAAGAGATTGAGAATACGTATAGGAGAGTAGTACGG	CGATTACCCGATAGGACGAA	AGTGTTAGGTTGCCAGATTCCAGATAAGAGATTGAGAATA	chrX:22497667-22497707	CGTATAGGAGAGTAGTACGG
chrX_C4	CGATTACCCGATAGGACGAACATTCAAGCTTCATTACCATAAAGCAACTGAAAGTCCAGACGTATAGGAGAGTAGTACGG	CGATTACCCGATAGGACGAA	CATTCAAGCTTCATTACCATAAAGCAACTGAAAGTCCAGA	chrX:22497709-22497749	CGTATAGGAGAGTAGTACGG
chrX_C4	CGATTACCCGATAGGACGAAAAAATTGCTGAGCAAGAGGGATAGTCAGATGTTTCAACAGCGTATAGGAGAGTAGTACGG	CGATTACCCGATAGGACGAA	AAAATTGCTGAGCAAGAGGGATAGTCAGATGTTTCAACAG	chrX:22497821-22497861	CGTATAGGAGAGTAGTACGG
chrX_C4	CGATTACCCGATAGGACGAAAAAGGTACTTGCTGTGCAAGCCTAATGGCTTTAGCTAAAACGTATAGGAGAGTAGTACGG	CGATTACCCGATAGGACGAA	AAAGGTACTTGCTGTGCAAGCCTAATGGCTTTAGCTAAAA	chrX:22497863-22497903	CGTATAGGAGAGTAGTACGG
chrX_C4	CGATTACCCGATAGGACGAACAAATAGCATAGTAGAAGGGAATATCTAACAGATGAGTGTCGTATAGGAGAGTAGTACGG	CGATTACCCGATAGGACGAA	CAAATAGCATAGTAGAAGGGAATATCTAACAGATGAGTGT	chrX:22497905-22497945	CGTATAGGAGAGTAGTACGG
chrX_C4	CGATTACCCGATAGGACGAATTTGTAAAGCAAGGGAACTAGTAAGAATGAACTAAGTGTGCGTATAGGAGAGTAGTACGG	CGATTACCCGATAGGACGAA	TTTGTAAAGCAAGGGAACTAGTAAGAATGAACTAAGTGTG	chrX:22497997-22498037	CGTATAGGAGAGTAGTACGG
chrX_C4	CGATTACCCGATAGGACGAAACTAAAAGATTTTGTGAGGACACAATGTAGCTGCTAAATGCGTATAGGAGAGTAGTACGG	CGATTACCCGATAGGACGAA	ACTAAAAGATTTTGTGAGGACACAATGTAGCTGCTAAATG	chrX:22498039-22498079	CGTATAGGAGAGTAGTACGG
chrX_C4	CGATTACCCGATAGGACGAATCTCAAATGGAATCGCACTGGGTATACAAACCATTAATGCCGTATAGGAGAGTAGTACGG	CGATTACCCGATAGGACGAA	TCTCAAATGGAATCGCACTGGGTATACAAACCATTAATGC	chrX:22498167-22498207	CGTATAGGAGAGTAGTACGG
chrX_C4	CGATTACCCGATAGGACGAAGACCACATTACAGGCAGTACACAGCCAACACAAAATGAACCGTATAGGAGAGTAGTACGG	CGATTACCCGATAGGACGAA	GACCACATTACAGGCAGTACACAGCCAACACAAAATGAAC	chrX:22498209-22498249	CGTATAGGAGAGTAGTACGG
chrX_C4	CGATTACCCGATAGGACGAAATACAGACCTGCCCTAGCTCACCAAGTTTTATTTTCTGTTCGTATAGGAGAGTAGTACGG	CGATTACCCGATAGGACGAA	ATACAGACCTGCCCTAGCTCACCAAGTTTTATTTTCTGTT	chrX:22498251-22498291	CGTATAGGAGAGTAGTACGG
chrX_C4	CGATTACCCGATAGGACGAATTAGATGCTTAAGAGATTGGGGAAAAGATATGAACTTGAGCGTATAGGAGAGTAGTACGG	CGATTACCCGATAGGACGAA	TTAGATGCTTAAGAGATTGGGGAAAAGATATGAACTTGAG	chrX:22498339-22498379	CGTATAGGAGAGTAGTACGG
chrX_C4	CGATTACCCGATAGGACGAAATTGGGGAAGAAAGAATGGTCTAGAAGCAGATGGAGGAAACGTATAGGAGAGTAGTACGG	CGATTACCCGATAGGACGAA	ATTGGGGAAGAAAGAATGGTCTAGAAGCAGATGGAGGAAA	chrX:22498381-22498421	CGTATAGGAGAGTAGTACGG
chrX_C4	CGATTACCCGATAGGACGAAGTTTGTATGAATAGCTCCATCATTTTGATACTCATGCATCCGTATAGGAGAGTAGTACGG	CGATTACCCGATAGGACGAA	GTTTGTATGAATAGCTCCATCATTTTGATACTCATGCATC	chrX:22498654-22498694	CGTATAGGAGAGTAGTACGG
chrX_C4	CGATTACCCGATAGGACGAATTTTCATCATTTGACCTTGAAAGACCTCAGTGGGGAGACCCGTATAGGAGAGTAGTACGG	CGATTACCCGATAGGACGAA	TTTTCATCATTTGACCTTGAAAGACCTCAGTGGGGAGACC	chrX:22498724-22498764	CGTATAGGAGAGTAGTACGG
chrX_C4	CGATTACCCGATAGGACGAACACTCACAAGTCTGGAGATGGTGCGCACACCCAAGGAATCCGTATAGGAGAGTAGTACGG	CGATTACCCGATAGGACGAA	CACTCACAAGTCTGGAGATGGTGCGCACACCCAAGGAATC	chrX:22498766-22498806	CGTATAGGAGAGTAGTACGG
chrX_C4	CGATTACCCGATAGGACGAAAGGCTCAGAAGCTAGGAGTTTATATACAAAGAAGTTGGGACGTATAGGAGAGTAGTACGG	CGATTACCCGATAGGACGAA	AGGCTCAGAAGCTAGGAGTTTATATACAAAGAAGTTGGGA	chrX:22498902-22498942	CGTATAGGAGAGTAGTACGG
chrX_C4	CGATTACCCGATAGGACGAAAGCAAATTGTACATGTAGAGCGAGGTAACAGCAATTCTGACGTATAGGAGAGTAGTACGG	CGATTACCCGATAGGACGAA	AGCAAATTGTACATGTAGAGCGAGGTAACAGCAATTCTGA	chrX:22498991-22499031	CGTATAGGAGAGTAGTACGG
chrX_C4	CGATTACCCGATAGGACGAAGGCAGTTGCTTAACTTGGCTGAGATAGTCTGGACGATCCTCGTATAGGAGAGTAGTACGG	CGATTACCCGATAGGACGAA	GGCAGTTGCTTAACTTGGCTGAGATAGTCTGGACGATCCT	chrX:22499033-22499073	CGTATAGGAGAGTAGTACGG
chrX_C4	CGATTACCCGATAGGACGAATGAGATAGTCCGGATATCTTTGTATGCCTCTATCTTTATGCGTATAGGAGAGTAGTACGG	CGATTACCCGATAGGACGAA	TGAGATAGTCCGGATATCTTTGTATGCCTCTATCTTTATG	chrX:22499075-22499115	CGTATAGGAGAGTAGTACGG
chrX_C4	CGATTACCCGATAGGACGAACATGAGTCATGGACCTTGAATTTAATTTTCTTACAACCTCCGTATAGGAGAGTAGTACGG	CGATTACCCGATAGGACGAA	CATGAGTCATGGACCTTGAATTTAATTTTCTTACAACCTC	chrX:22499199-22499239	CGTATAGGAGAGTAGTACGG
chrX_C4	CGATTACCCGATAGGACGAATATTTTGATCATAATCTTCCTCTATCTCAAGTTCCTCCAGCGTATAGGAGAGTAGTACGG	CGATTACCCGATAGGACGAA	TATTTTGATCATAATCTTCCTCTATCTCAAGTTCCTCCAG	chrX:22499320-22499360	CGTATAGGAGAGTAGTACGG
chrX_C4	CGATTACCCGATAGGACGAACCTCTTCCCATCCCACCCACGAAAATTTAAATTCTTTCTCCGTATAGGAGAGTAGTACGG	CGATTACCCGATAGGACGAA	CCTCTTCCCATCCCACCCACGAAAATTTAAATTCTTTCTC	chrX:22499362-22499402	CGTATAGGAGAGTAGTACGG
chrX_C4	CGATTACCCGATAGGACGAAAAAATGTGGAGTCCAATTATATGTTGGTCAGCTACTCCTACGTATAGGAGAGTAGTACGG	CGATTACCCGATAGGACGAA	AAAATGTGGAGTCCAATTATATGTTGGTCAGCTACTCCTA	chrX:22499545-22499585	CGTATAGGAGAGTAGTACGG
chrX_C4	CGATTACCCGATAGGACGAACAGGAGTCCTGTTCTAGAGGGGTTGATATATTCAGTGTTCCGTATAGGAGAGTAGTACGG	CGATTACCCGATAGGACGAA	CAGGAGTCCTGTTCTAGAGGGGTTGATATATTCAGTGTTC	chrX:22499587-22499627	CGTATAGGAGAGTAGTACGG
chrX_C4	CGATTACCCGATAGGACGAATTGGTCCCAAAAGGTATAAGTTACAGTTCAGTTGTTAATCCGTATAGGAGAGTAGTACGG	CGATTACCCGATAGGACGAA	TTGGTCCCAAAAGGTATAAGTTACAGTTCAGTTGTTAATC	chrX:22499629-22499669	CGTATAGGAGAGTAGTACGG
chrX_C4	CGATTACCCGATAGGACGAAGTGAAAATTTGATTGCCTACTTCCCTAGTAAGTTTTAAGCCGTATAGGAGAGTAGTACGG	CGATTACCCGATAGGACGAA	GTGAAAATTTGATTGCCTACTTCCCTAGTAAGTTTTAAGC	chrX:22499707-22499747	CGTATAGGAGAGTAGTACGG
chrX_C4	CGATTACCCGATAGGACGAAACAATAGTAACTATAGTCTCAATTCAATCCATGACATCCCCGTATAGGAGAGTAGTACGG	CGATTACCCGATAGGACGAA	ACAATAGTAACTATAGTCTCAATTCAATCCATGACATCCC	chrX:22499749-22499789	CGTATAGGAGAGTAGTACGG
chrX_C4	CGATTACCCGATAGGACGAATAAGCTTCTTATTCTTTGACCAACATCTCTCTATTCCCCTCGTATAGGAGAGTAGTACGG	CGATTACCCGATAGGACGAA	TAAGCTTCTTATTCTTTGACCAACATCTCTCTATTCCCCT	chrX:22499791-22499831	CGTATAGGAGAGTAGTACGG
chrX_C4	CGATTACCCGATAGGACGAATTTCAGGGTTTTCACATCTAGAAATATGCTGTTTGCTTTCCGTATAGGAGAGTAGTACGG	CGATTACCCGATAGGACGAA	TTTCAGGGTTTTCACATCTAGAAATATGCTGTTTGCTTTC	chrX:22499833-22499873	CGTATAGGAGAGTAGTACGG
chrX_C4	CGATTACCCGATAGGACGAAGTGTTCCACACGTTAGTGAGTCGAGTCTATGATTTCAATTCGTATAGGAGAGTAGTACGG	CGATTACCCGATAGGACGAA	GTGTTCCACACGTTAGTGAGTCGAGTCTATGATTTCAATT	chrX:22499875-22499915	CGTATAGGAGAGTAGTACGG
chrX_C4	CGATTACCCGATAGGACGAATATGTCGTATATGGTAGGATGAAGGTCAAATGTTAAACCTCGTATAGGAGAGTAGTACGG	CGATTACCCGATAGGACGAA	TATGTCGTATATGGTAGGATGAAGGTCAAATGTTAAACCT	chrX:22499917-22499957	CGTATAGGAGAGTAGTACGG
chrX_C4	CGATTACCCGATAGGACGAATTTTCCTAACCTCATTTATTAAGATGATGGTCCTTCCTTCCGTATAGGAGAGTAGTACGG	CGATTACCCGATAGGACGAA	TTTTCCTAACCTCATTTATTAAGATGATGGTCCTTCCTTC	chrX:22499959-22499999	CGTATAGGAGAGTAGTACGG
chrX_C4	CGATTACCCGATAGGACGAAATTACACTGTTTATATCTCTGCTTCATGCCATTATGATGCCGTATAGGAGAGTAGTACGG	CGATTACCCGATAGGACGAA	ATTACACTGTTTATATCTCTGCTTCATGCCATTATGATGC	chrX:22500049-22500089	CGTATAGGAGAGTAGTACGG
chrX_C4	CGATTACCCGATAGGACGAAGTGTGTGTGTTTCATGTTTCTCTTTTCTTCTTTGTCAAGACGTATAGGAGAGTAGTACGG	CGATTACCCGATAGGACGAA	GTGTGTGTGTTTCATGTTTCTCTTTTCTTCTTTGTCAAGA	chrX:22500091-22500131	CGTATAGGAGAGTAGTACGG
chrX_C4	CGATTACCCGATAGGACGAAACTTGTCTATTCAGGATTCTTTGAGATCCCATGTGAATTTCGTATAGGAGAGTAGTACGG	CGATTACCCGATAGGACGAA	ACTTGTCTATTCAGGATTCTTTGAGATCCCATGTGAATTT	chrX:22500133-22500173	CGTATAGGAGAGTAGTACGG
chrX_C4	CGATTACCCGATAGGACGAATTATCCACGTATTCAATATATTTCAATCACGTTCACCTCCCGTATAGGAGAGTAGTACGG	CGATTACCCGATAGGACGAA	TTATCCACGTATTCAATATATTTCAATCACGTTCACCTCC	chrX:22500220-22500260	CGTATAGGAGAGTAGTACGG
chrX_C4	CGATTACCCGATAGGACGAACTCTCCCACTAACTCCTCCCAGGTGATCACATATTTCTCTCGTATAGGAGAGTAGTACGG	CGATTACCCGATAGGACGAA	CTCTCCCACTAACTCCTCCCAGGTGATCACATATTTCTCT	chrX:22500262-22500302	CGTATAGGAGAGTAGTACGG
chrX_C4	CGATTACCCGATAGGACGAACTTCAGCAAGGCCGTAATTCATACCTCTCCCCAAACAGTCTCGGCTCAATGTTCACTACG	CGATTACCCGATAGGACGAA	CTTCAGCAAGGCCGTAATTCATACCTCTCCCCAAACAGTC	chrX:23496145-23496185	TCGGCTCAATGTTCACTACG
chrX_C4	CGATTACCCGATAGGACGAAGCTGAACACCAAATATTCAGATGCCCAAGACATACAGGGCTCGGCTCAATGTTCACTACG	CGATTACCCGATAGGACGAA	GCTGAACACCAAATATTCAGATGCCCAAGACATACAGGGC	chrX:23496189-23496229	TCGGCTCAATGTTCACTACG
chrX_C4	CGATTACCCGATAGGACGAACTCAAAGTTAACTAATAGAGGCCTAGCATACAGTATTTACTCGGCTCAATGTTCACTACG	CGATTACCCGATAGGACGAA	CTCAAAGTTAACTAATAGAGGCCTAGCATACAGTATTTAC	chrX:23496315-23496355	TCGGCTCAATGTTCACTACG
chrX_C4	CGATTACCCGATAGGACGAAGACCTTATGGAGGTGTCAGGTTTTGAGCTTGTTCAATGTTTCGGCTCAATGTTCACTACG	CGATTACCCGATAGGACGAA	GACCTTATGGAGGTGTCAGGTTTTGAGCTTGTTCAATGTT	chrX:23496480-23496520	TCGGCTCAATGTTCACTACG
chrX_C4	CGATTACCCGATAGGACGAATTCAATTTTATGCACACATCTCAGAGATTAGAAAGGGCCATCGGCTCAATGTTCACTACG	CGATTACCCGATAGGACGAA	TTCAATTTTATGCACACATCTCAGAGATTAGAAAGGGCCA	chrX:23496539-23496579	TCGGCTCAATGTTCACTACG
chrX_C4	CGATTACCCGATAGGACGAATAGAGTTATACAAAGCAAAGGAACCAAGGAGAGCAAACTTTCGGCTCAATGTTCACTACG	CGATTACCCGATAGGACGAA	TAGAGTTATACAAAGCAAAGGAACCAAGGAGAGCAAACTT	chrX:23496584-23496624	TCGGCTCAATGTTCACTACG
chrX_C4	CGATTACCCGATAGGACGAAATCTCGCAGTTTGATGATGAGGATGAAGAAATAGAGGAAGTCGGCTCAATGTTCACTACG	CGATTACCCGATAGGACGAA	ATCTCGCAGTTTGATGATGAGGATGAAGAAATAGAGGAAG	chrX:23496706-23496746	TCGGCTCAATGTTCACTACG
chrX_C4	CGATTACCCGATAGGACGAATCTTTGGAGAGAGGTGGGTAAAAGTGGGGAGAGAGAAGAGTCGGCTCAATGTTCACTACG	CGATTACCCGATAGGACGAA	TCTTTGGAGAGAGGTGGGTAAAAGTGGGGAGAGAGAAGAG	chrX:23496757-23496797	TCGGCTCAATGTTCACTACG
chrX_C4	CGATTACCCGATAGGACGAACATAATTGTCAAGCTTATTTCCTTTCAATAACCCCAACTGTCGGCTCAATGTTCACTACG	CGATTACCCGATAGGACGAA	CATAATTGTCAAGCTTATTTCCTTTCAATAACCCCAACTG	chrX:23497090-23497130	TCGGCTCAATGTTCACTACG
chrX_C4	CGATTACCCGATAGGACGAAGCAGAAAAGGAGTTACAGTTTCTAAACAGCATAATTCATCTCGGCTCAATGTTCACTACG	CGATTACCCGATAGGACGAA	GCAGAAAAGGAGTTACAGTTTCTAAACAGCATAATTCATC	chrX:23497147-23497187	TCGGCTCAATGTTCACTACG
chrX_C4	CGATTACCCGATAGGACGAATTGCCACGCTAGTTCTGTTAAGTATTGACAAGTCACCATGTCGGCTCAATGTTCACTACG	CGATTACCCGATAGGACGAA	TTGCCACGCTAGTTCTGTTAAGTATTGACAAGTCACCATG	chrX:23497189-23497229	TCGGCTCAATGTTCACTACG
chrX_C4	CGATTACCCGATAGGACGAATGAAGATACAGACAATTCCATAATCCCACAAATTTTCCTCTCGGCTCAATGTTCACTACG	CGATTACCCGATAGGACGAA	TGAAGATACAGACAATTCCATAATCCCACAAATTTTCCTC	chrX:23497233-23497273	TCGGCTCAATGTTCACTACG
chrX_C4	CGATTACCCGATAGGACGAAGCTTGCCTACTCTGCAAGGTCCAGGAATCACTGAAATATTTCGGCTCAATGTTCACTACG	CGATTACCCGATAGGACGAA	GCTTGCCTACTCTGCAAGGTCCAGGAATCACTGAAATATT	chrX:23497275-23497315	TCGGCTCAATGTTCACTACG
chrX_C4	CGATTACCCGATAGGACGAAAGTAATTCAGCATTTTAATTCTGGCTTCCTTCACTTAGCATCGGCTCAATGTTCACTACG	CGATTACCCGATAGGACGAA	AGTAATTCAGCATTTTAATTCTGGCTTCCTTCACTTAGCA	chrX:23497331-23497371	TCGGCTCAATGTTCACTACG
chrX_C4	CGATTACCCGATAGGACGAAAGCATTTAGTTTCATGCGTATTGTTAGGAACCAATATCTGTCGGCTCAATGTTCACTACG	CGATTACCCGATAGGACGAA	AGCATTTAGTTTCATGCGTATTGTTAGGAACCAATATCTG	chrX:23497374-23497414	TCGGCTCAATGTTCACTACG
chrX_C4	CGATTACCCGATAGGACGAAGATTCCGCTGCCTCTGGAAGAGCAACAAGGATGCTTATCTTCGGCTCAATGTTCACTACG	CGATTACCCGATAGGACGAA	GATTCCGCTGCCTCTGGAAGAGCAACAAGGATGCTTATCT	chrX:23497604-23497644	TCGGCTCAATGTTCACTACG
chrX_C4	CGATTACCCGATAGGACGAATGCATCTCTCCCAGTCCTTAATTTTGTAACAATTTACTAGTCGGCTCAATGTTCACTACG	CGATTACCCGATAGGACGAA	TGCATCTCTCCCAGTCCTTAATTTTGTAACAATTTACTAG	chrX:23497646-23497686	TCGGCTCAATGTTCACTACG
chrX_C4	CGATTACCCGATAGGACGAAGTAGGACACTTGAGTATTTTCCAGATGCTAGTAATTTTGATCGGCTCAATGTTCACTACG	CGATTACCCGATAGGACGAA	GTAGGACACTTGAGTATTTTCCAGATGCTAGTAATTTTGA	chrX:23497688-23497728	TCGGCTCAATGTTCACTACG
chrX_C4	CGATTACCCGATAGGACGAAAGTACTTTCTTCATTAAGCCTAAGACTACCATATAATCCCTCGGCTCAATGTTCACTACG	CGATTACCCGATAGGACGAA	AGTACTTTCTTCATTAAGCCTAAGACTACCATATAATCCC	chrX:23497929-23497969	TCGGCTCAATGTTCACTACG
chrX_C4	CGATTACCCGATAGGACGAAATTATATTCTGTTGTTCCATGATGGGTTTACCATTATGGCTCGGCTCAATGTTCACTACG	CGATTACCCGATAGGACGAA	ATTATATTCTGTTGTTCCATGATGGGTTTACCATTATGGC	chrX:23498049-23498089	TCGGCTCAATGTTCACTACG
chrX_C4	CGATTACCCGATAGGACGAATACTGGAGTATGCTTGAATCTTTCTTCCATATCTACCTTCTCGGCTCAATGTTCACTACG	CGATTACCCGATAGGACGAA	TACTGGAGTATGCTTGAATCTTTCTTCCATATCTACCTTC	chrX:23498091-23498131	TCGGCTCAATGTTCACTACG
chrX_C4	CGATTACCCGATAGGACGAAGAATGCTATGTCTACTTTATACTATTTATGGACCAATGGCTCGGCTCAATGTTCACTACG	CGATTACCCGATAGGACGAA	GAATGCTATGTCTACTTTATACTATTTATGGACCAATGGC	chrX:23498134-23498174	TCGGCTCAATGTTCACTACG
chrX_C4	CGATTACCCGATAGGACGAAAAAATCTACTTAAGGCTACATTTGCCCACATGGATGTTTATCGGCTCAATGTTCACTACG	CGATTACCCGATAGGACGAA	AAAATCTACTTAAGGCTACATTTGCCCACATGGATGTTTA	chrX:23498226-23498266	TCGGCTCAATGTTCACTACG
chrX_C4	CGATTACCCGATAGGACGAACCTTCACTCAAGTGTGTATTGCTGAGCATTCTCCATTTATTCGGCTCAATGTTCACTACG	CGATTACCCGATAGGACGAA	CCTTCACTCAAGTGTGTATTGCTGAGCATTCTCCATTTAT	chrX:23498268-23498308	TCGGCTCAATGTTCACTACG
chrX_C4	CGATTACCCGATAGGACGAATTGTCTACCTTTACATTCAGTGGTTTGGCTGTTATTTCTCTCGGCTCAATGTTCACTACG	CGATTACCCGATAGGACGAA	TTGTCTACCTTTACATTCAGTGGTTTGGCTGTTATTTCTC	chrX:23498326-23498366	TCGGCTCAATGTTCACTACG
chrX_C4	CGATTACCCGATAGGACGAAGGTACTCCGTAGACTTGATGCTAATAGCCTATTATCCAATTCGGCTCAATGTTCACTACG	CGATTACCCGATAGGACGAA	GGTACTCCGTAGACTTGATGCTAATAGCCTATTATCCAAT	chrX:23498368-23498408	TCGGCTCAATGTTCACTACG
chrX_C4	CGATTACCCGATAGGACGAAGCTGTGGGCCAGCAAGCCAGATAATGAAGTCTATTAGAGTTCGGCTCAATGTTCACTACG	CGATTACCCGATAGGACGAA	GCTGTGGGCCAGCAAGCCAGATAATGAAGTCTATTAGAGT	chrX:23498410-23498450	TCGGCTCAATGTTCACTACG
chrX_C4	CGATTACCCGATAGGACGAATGTACAAAATAAGGTTACTGACTGAAGTTGGAATCAGATCTCGGCTCAATGTTCACTACG	CGATTACCCGATAGGACGAA	TGTACAAAATAAGGTTACTGACTGAAGTTGGAATCAGATC	chrX:23498452-23498492	TCGGCTCAATGTTCACTACG
chrX_C4	CGATTACCCGATAGGACGAATTTTCCTACAGAGTAAAGTTCATAGCGTTTGAAGATGTTGTCGGCTCAATGTTCACTACG	CGATTACCCGATAGGACGAA	TTTTCCTACAGAGTAAAGTTCATAGCGTTTGAAGATGTTG	chrX:23498506-23498546	TCGGCTCAATGTTCACTACG
chrX_C4	CGATTACCCGATAGGACGAAAAAAGCCTTCTCTTGTTCCTTTCAGGTTCTGGTCATAGTCTCGGCTCAATGTTCACTACG	CGATTACCCGATAGGACGAA	AAAAGCCTTCTCTTGTTCCTTTCAGGTTCTGGTCATAGTC	chrX:23498559-23498599	TCGGCTCAATGTTCACTACG
chrX_C4	CGATTACCCGATAGGACGAAGAGATGCTAGTTAAGATTGCTGGAAGTCTAAACTCCAGATTCGGCTCAATGTTCACTACG	CGATTACCCGATAGGACGAA	GAGATGCTAGTTAAGATTGCTGGAAGTCTAAACTCCAGAT	chrX:23498601-23498641	TCGGCTCAATGTTCACTACG
chrX_C4	CGATTACCCGATAGGACGAAAGGGATGATACAATAGTTTACATCTCTCTAATCAGTGGAATCGGCTCAATGTTCACTACG	CGATTACCCGATAGGACGAA	AGGGATGATACAATAGTTTACATCTCTCTAATCAGTGGAA	chrX:23498643-23498683	TCGGCTCAATGTTCACTACG
chrX_C4	CGATTACCCGATAGGACGAAATTTGCAGTATCTCTGTGCAATGTGGAACAAGTGAGCCTTTCGGCTCAATGTTCACTACG	CGATTACCCGATAGGACGAA	ATTTGCAGTATCTCTGTGCAATGTGGAACAAGTGAGCCTT	chrX:23498685-23498725	TCGGCTCAATGTTCACTACG
chrX_C4	CGATTACCCGATAGGACGAAAATCTAGGTGAAGTAAGAAGCAGGTTTGCATAAACTTAACTCGGCTCAATGTTCACTACG	CGATTACCCGATAGGACGAA	AATCTAGGTGAAGTAAGAAGCAGGTTTGCATAAACTTAAC	chrX:23498727-23498767	TCGGCTCAATGTTCACTACG
chrX_C4	CGATTACCCGATAGGACGAATTAGCAACAGAACAATGATGAACAAACCATTAACCCAAGGTCGGCTCAATGTTCACTACG	CGATTACCCGATAGGACGAA	TTAGCAACAGAACAATGATGAACAAACCATTAACCCAAGG	chrX:23498769-23498809	TCGGCTCAATGTTCACTACG
chrX_C4	CGATTACCCGATAGGACGAAAAAGCCAGGCCTTTTAGAACATGAAAATGAGTACAAAGAATCGGCTCAATGTTCACTACG	CGATTACCCGATAGGACGAA	AAAGCCAGGCCTTTTAGAACATGAAAATGAGTACAAAGAA	chrX:23498813-23498853	TCGGCTCAATGTTCACTACG
chrX_C4	CGATTACCCGATAGGACGAATGTATTCCAAGTTTTGCCTCCTGTACTCATCAGCCTCTATTCGGCTCAATGTTCACTACG	CGATTACCCGATAGGACGAA	TGTATTCCAAGTTTTGCCTCCTGTACTCATCAGCCTCTAT	chrX:23498855-23498895	TCGGCTCAATGTTCACTACG
chrX_C4	CGATTACCCGATAGGACGAAGTGTGCATGTTCCATCTTTAATCATGTTAAATGGAAACTCTCGGCTCAATGTTCACTACG	CGATTACCCGATAGGACGAA	GTGTGCATGTTCCATCTTTAATCATGTTAAATGGAAACTC	chrX:23498953-23498993	TCGGCTCAATGTTCACTACG
chrX_C4	CGATTACCCGATAGGACGAATCACAACATGCACAGCCTTTCTCCACAATGTGCAATTGTCTCGGCTCAATGTTCACTACG	CGATTACCCGATAGGACGAA	TCACAACATGCACAGCCTTTCTCCACAATGTGCAATTGTC	chrX:23498995-23499035	TCGGCTCAATGTTCACTACG
chrX_C4	CGATTACCCGATAGGACGAACCTAGAGTTTAATGGCTTTGTGACCTCACAGGAGGACTGATCGGCTCAATGTTCACTACG	CGATTACCCGATAGGACGAA	CCTAGAGTTTAATGGCTTTGTGACCTCACAGGAGGACTGA	chrX:23499037-23499077	TCGGCTCAATGTTCACTACG
chrX_C4	CGATTACCCGATAGGACGAATACCACTACAATTTAGCAGGAGAAAACAGCTGTTCTACTATCGGCTCAATGTTCACTACG	CGATTACCCGATAGGACGAA	TACCACTACAATTTAGCAGGAGAAAACAGCTGTTCTACTA	chrX:23499079-23499119	TCGGCTCAATGTTCACTACG
chrX_C4	CGATTACCCGATAGGACGAATGCCGTTTTGCTCTCCCATGTTGTTATAGAAAAGTAAGTCTCGGCTCAATGTTCACTACG	CGATTACCCGATAGGACGAA	TGCCGTTTTGCTCTCCCATGTTGTTATAGAAAAGTAAGTC	chrX:23499121-23499161	TCGGCTCAATGTTCACTACG
chrX_C4	CGATTACCCGATAGGACGAAGAAGAAAGAAACCACTTACTTTCTAAATCAGCTTCTGTTCTCGGCTCAATGTTCACTACG	CGATTACCCGATAGGACGAA	GAAGAAAGAAACCACTTACTTTCTAAATCAGCTTCTGTTC	chrX:23499167-23499207	TCGGCTCAATGTTCACTACG
chrX_C4	CGATTACCCGATAGGACGAAAAAACCTCTCTTTGCTTTGGACCAAATACACTGTCTCAAATCGGCTCAATGTTCACTACG	CGATTACCCGATAGGACGAA	AAAACCTCTCTTTGCTTTGGACCAAATACACTGTCTCAAA	chrX:23499291-23499331	TCGGCTCAATGTTCACTACG
chrX_C4	CGATTACCCGATAGGACGAATATCAGTGATTTCCACTCCAAAGAAGAGTTTAGTCACTTGTCGGCTCAATGTTCACTACG	CGATTACCCGATAGGACGAA	TATCAGTGATTTCCACTCCAAAGAAGAGTTTAGTCACTTG	chrX:23499333-23499373	TCGGCTCAATGTTCACTACG
chrX_C4	CGATTACCCGATAGGACGAATAATTTTCCACAGCACAGGAAATGAAGAGACTGTATATTCTCGGCTCAATGTTCACTACG	CGATTACCCGATAGGACGAA	TAATTTTCCACAGCACAGGAAATGAAGAGACTGTATATTC	chrX:23499383-23499423	TCGGCTCAATGTTCACTACG
chrX_C4	CGATTACCCGATAGGACGAATCAGATGGGCAACTGAACAAACAGGGCTCCAGGTGGCTAATCGGCTCAATGTTCACTACG	CGATTACCCGATAGGACGAA	TCAGATGGGCAACTGAACAAACAGGGCTCCAGGTGGCTAA	chrX:23499425-23499465	TCGGCTCAATGTTCACTACG
chrX_C4	CGATTACCCGATAGGACGAATCAAAGGGGTGAAGACACCCTGGAGAATAATGAGGCTGTGTCGGCTCAATGTTCACTACG	CGATTACCCGATAGGACGAA	TCAAAGGGGTGAAGACACCCTGGAGAATAATGAGGCTGTG	chrX:23499467-23499507	TCGGCTCAATGTTCACTACG
chrX_C4	CGATTACCCGATAGGACGAAATTCAACAGCCTTCTCCTCGTCAATATCCCAACACATTCTTCGGCTCAATGTTCACTACG	CGATTACCCGATAGGACGAA	ATTCAACAGCCTTCTCCTCGTCAATATCCCAACACATTCT	chrX:23499509-23499549	TCGGCTCAATGTTCACTACG
chrX_C4	CGATTACCCGATAGGACGAACTGCATTGCTGACAGGATAGCAAGACATTTTCAAACAACATCGGCTCAATGTTCACTACG	CGATTACCCGATAGGACGAA	CTGCATTGCTGACAGGATAGCAAGACATTTTCAAACAACA	chrX:23499551-23499591	TCGGCTCAATGTTCACTACG
chrX_C4	CGATTACCCGATAGGACGAATCAGTTTCTTCAGAACGATGTAATTTATTGCAATGCTGAGTCGGCTCAATGTTCACTACG	CGATTACCCGATAGGACGAA	TCAGTTTCTTCAGAACGATGTAATTTATTGCAATGCTGAG	chrX:23499618-23499658	TCGGCTCAATGTTCACTACG
chrX_C4	CGATTACCCGATAGGACGAAGTTTATATCCTTCCTCTCCTTTCATTATCTCTCTTTAACCTCGGCTCAATGTTCACTACG	CGATTACCCGATAGGACGAA	GTTTATATCCTTCCTCTCCTTTCATTATCTCTCTTTAACC	chrX:23499660-23499700	TCGGCTCAATGTTCACTACG
chrX_C4	CGATTACCCGATAGGACGAAAAATCTCTTTCTTGGGCAGTTCCAGCAAAAGGTGCCAAAATCGGCTCAATGTTCACTACG	CGATTACCCGATAGGACGAA	AAATCTCTTTCTTGGGCAGTTCCAGCAAAAGGTGCCAAAA	chrX:23499717-23499757	TCGGCTCAATGTTCACTACG
chrX_C4	CGATTACCCGATAGGACGAAGGATCCCTTGTTATCTTTTGAAAGACTTTAAAAGGTTGAGTCGGCTCAATGTTCACTACG	CGATTACCCGATAGGACGAA	GGATCCCTTGTTATCTTTTGAAAGACTTTAAAAGGTTGAG	chrX:23499769-23499809	TCGGCTCAATGTTCACTACG
chrX_C4	CGATTACCCGATAGGACGAATTGACTATACCATTTTCCCTTCTAAGAAACATTTCCAAGCTCGGCTCAATGTTCACTACG	CGATTACCCGATAGGACGAA	TTGACTATACCATTTTCCCTTCTAAGAAACATTTCCAAGC	chrX:23499842-23499882	TCGGCTCAATGTTCACTACG
chrX_C4	CGATTACCCGATAGGACGAAAAAATGACTCTGCATCAGCCAGACATACTACACATGTCATTCGGCTCAATGTTCACTACG	CGATTACCCGATAGGACGAA	AAAATGACTCTGCATCAGCCAGACATACTACACATGTCAT	chrX:23499918-23499958	TCGGCTCAATGTTCACTACG
chrX_C4	CGATTACCCGATAGGACGAAAAAATGGTTTGTTTATGATGGCTGTGTTTAGGTAGCTCTATCGGCTCAATGTTCACTACG	CGATTACCCGATAGGACGAA	AAAATGGTTTGTTTATGATGGCTGTGTTTAGGTAGCTCTA	chrX:23499966-23500006	TCGGCTCAATGTTCACTACG
chrX_C4	CGATTACCCGATAGGACGAAGGCAACATCAATATGATAAAGGAGCTGGATGAAATTTGATTCGGCTCAATGTTCACTACG	CGATTACCCGATAGGACGAA	GGCAACATCAATATGATAAAGGAGCTGGATGAAATTTGAT	chrX:23500008-23500048	TCGGCTCAATGTTCACTACG
chrX_C4	CGATTACCCGATAGGACGAATTTTGTTGAGGGAAACAGATGAGTTTAGAATGGGGATATATCGGCTCAATGTTCACTACG	CGATTACCCGATAGGACGAA	TTTTGTTGAGGGAAACAGATGAGTTTAGAATGGGGATATA	chrX:23500090-23500130	TCGGCTCAATGTTCACTACG
chrX_C4	CGATTACCCGATAGGACGAAAGGTCAATTTTGTGGATTGGTAGTAGTCCAAATGAAATAGTCGGCTCAATGTTCACTACG	CGATTACCCGATAGGACGAA	AGGTCAATTTTGTGGATTGGTAGTAGTCCAAATGAAATAG	chrX:23500132-23500172	TCGGCTCAATGTTCACTACG
chrX_C4	CGATTACCCGATAGGACGAATCTGGGTCATGTGAGTGAGAGCAGAGAAAGACAGTTTATTTCGGCTCAATGTTCACTACG	CGATTACCCGATAGGACGAA	TCTGGGTCATGTGAGTGAGAGCAGAGAAAGACAGTTTATT	chrX:23500174-23500214	TCGGCTCAATGTTCACTACG
chrX_C4	CGATTACCCGATAGGACGAAACATAATCTATACGCACATATTGGGTCCATTTAGTATTGCTCGGCTCAATGTTCACTACG	CGATTACCCGATAGGACGAA	ACATAATCTATACGCACATATTGGGTCCATTTAGTATTGC	chrX:23500219-23500259	TCGGCTCAATGTTCACTACG
chrX_C4	CGATTACCCGATAGGACGAAGTCTGTATTTAGGACTGAGCATTTGGGAGTGGAAAACCTTTCGGCTCAATGTTCACTACG	CGATTACCCGATAGGACGAA	GTCTGTATTTAGGACTGAGCATTTGGGAGTGGAAAACCTT	chrX:23500265-23500305	TCGGCTCAATGTTCACTACG
chrX_C4	CGATTACCCGATAGGACGAAAGGATCACACACGTCAGACATAGACAATAGAGGAAACAAATCGGCTCAATGTTCACTACG	CGATTACCCGATAGGACGAA	AGGATCACACACGTCAGACATAGACAATAGAGGAAACAAA	chrX:23500307-23500347	TCGGCTCAATGTTCACTACG
chrX_C4	CGATTACCCGATAGGACGAAAGCTGCCTCCCTGAGGATTAGCACTCGCAGTGTTACAAGCTCGGCTCAATGTTCACTACG	CGATTACCCGATAGGACGAA	AGCTGCCTCCCTGAGGATTAGCACTCGCAGTGTTACAAGC	chrX:23500363-23500403	TCGGCTCAATGTTCACTACG
chrX_C4	CGATTACCCGATAGGACGAAGTGAAGGAGAAAAGCGATCATCACTTCCTCCTACTCAGCTTCGGCTCAATGTTCACTACG	CGATTACCCGATAGGACGAA	GTGAAGGAGAAAAGCGATCATCACTTCCTCCTACTCAGCT	chrX:23500405-23500445	TCGGCTCAATGTTCACTACG
chrX_C4	CGATTACCCGATAGGACGAACAACAATGACCAGCCTAGCAAGACATTCCTAGGTGGATTTTCGGCTCAATGTTCACTACG	CGATTACCCGATAGGACGAA	CAACAATGACCAGCCTAGCAAGACATTCCTAGGTGGATTT	chrX:23500462-23500502	TCGGCTCAATGTTCACTACG
chrX_C4	CGATTACCCGATAGGACGAAGCTGTCTAAAGCAGTGTTTTATACTTAGAGGAACAGACACTCGGCTCAATGTTCACTACG	CGATTACCCGATAGGACGAA	GCTGTCTAAAGCAGTGTTTTATACTTAGAGGAACAGACAC	chrX:23500532-23500572	TCGGCTCAATGTTCACTACG
chrX_C4	CGATTACCCGATAGGACGAAAATAACATCAGTTCTTTCAAGTGTGATCATGATGATGTGGTCGGCTCAATGTTCACTACG	CGATTACCCGATAGGACGAA	AATAACATCAGTTCTTTCAAGTGTGATCATGATGATGTGG	chrX:23500638-23500678	TCGGCTCAATGTTCACTACG
chrX_C4	CGATTACCCGATAGGACGAATTTTACATATCTTAATGCACACACAAACACACTTCAGGGATCGGCTCAATGTTCACTACG	CGATTACCCGATAGGACGAA	TTTTACATATCTTAATGCACACACAAACACACTTCAGGGA	chrX:23500690-23500730	TCGGCTCAATGTTCACTACG
chrX_C4	CGATTACCCGATAGGACGAAACAATACATATTTGGGGATTCACTTCAAAATAACACAGGGTCGGCTCAATGTTCACTACG	CGATTACCCGATAGGACGAA	ACAATACATATTTGGGGATTCACTTCAAAATAACACAGGG	chrX:23500742-23500782	TCGGCTCAATGTTCACTACG
chrX_C4	CGATTACCCGATAGGACGAAAATGGGGCATAGTTAAGTCAAATCACAGTGGCCCATGAGATCGGCTCAATGTTCACTACG	CGATTACCCGATAGGACGAA	AATGGGGCATAGTTAAGTCAAATCACAGTGGCCCATGAGA	chrX:23500784-23500824	TCGGCTCAATGTTCACTACG
chrX_C4	CGATTACCCGATAGGACGAAAAATTGCTACATCAGGATAATGGCTACATAAGGAGTTGTCTCGGCTCAATGTTCACTACG	CGATTACCCGATAGGACGAA	AAATTGCTACATCAGGATAATGGCTACATAAGGAGTTGTC	chrX:23500826-23500866	TCGGCTCAATGTTCACTACG
chrX_C4	CGATTACCCGATAGGACGAAAAGTTAACCTTTAATCATTGTAATGCCTTGAGAAGGATCCTCGGCTCAATGTTCACTACG	CGATTACCCGATAGGACGAA	AAGTTAACCTTTAATCATTGTAATGCCTTGAGAAGGATCC	chrX:23500913-23500953	TCGGCTCAATGTTCACTACG
chrX_C4	CGATTACCCGATAGGACGAATTTTAAACCTCATGCAACCCACAAACCAAACAAACCAGACTCGGCTCAATGTTCACTACG	CGATTACCCGATAGGACGAA	TTTTAAACCTCATGCAACCCACAAACCAAACAAACCAGAC	chrX:23501008-23501048	TCGGCTCAATGTTCACTACG
chrX_C4	CGATTACCCGATAGGACGAACTGGGAATCTACCAAATGGACCTGGTAAATCCCCACTTCTTCGGCTCAATGTTCACTACG	CGATTACCCGATAGGACGAA	CTGGGAATCTACCAAATGGACCTGGTAAATCCCCACTTCT	chrX:23501050-23501090	TCGGCTCAATGTTCACTACG
chrX_C4	CGATTACCCGATAGGACGAAACTTGAAAACACCTGCTTCTTTCTACTACTAATGGCTTGCTCGGCTCAATGTTCACTACG	CGATTACCCGATAGGACGAA	ACTTGAAAACACCTGCTTCTTTCTACTACTAATGGCTTGC	chrX:23501092-23501132	TCGGCTCAATGTTCACTACG
chrX_C4	CGATTACCCGATAGGACGAATTCCCAACTCTATCTCTATTTGACAAATTCCATCCAATCTTCGGCTCAATGTTCACTACG	CGATTACCCGATAGGACGAA	TTCCCAACTCTATCTCTATTTGACAAATTCCATCCAATCT	chrX:23501134-23501174	TCGGCTCAATGTTCACTACG
chrX_C4	CGATTACCCGATAGGACGAATATATCAAATATGGCTTCCTCCTTGGAGACTTAACATTTCTCGGCTCAATGTTCACTACG	CGATTACCCGATAGGACGAA	TATATCAAATATGGCTTCCTCCTTGGAGACTTAACATTTC	chrX:23501176-23501216	TCGGCTCAATGTTCACTACG
chrX_C4	CGATTACCCGATAGGACGAACCTCAACAGAAAGCAAATGTCTTCCCAACATAATCCTGTTTCGGCTCAATGTTCACTACG	CGATTACCCGATAGGACGAA	CCTCAACAGAAAGCAAATGTCTTCCCAACATAATCCTGTT	chrX:23501218-23501258	TCGGCTCAATGTTCACTACG
chrX_C4	CGATTACCCGATAGGACGAATGTGTGTGATACACGTATGATATGCTTGTAGTTTATAGTCTCGGCTCAATGTTCACTACG	CGATTACCCGATAGGACGAA	TGTGTGTGATACACGTATGATATGCTTGTAGTTTATAGTC	chrX:23501557-23501597	TCGGCTCAATGTTCACTACG
chrX_C4	CGATTACCCGATAGGACGAAATCTACATGCTACTGTGTAAGCCCATTCACAGAAACCAGATCGGCTCAATGTTCACTACG	CGATTACCCGATAGGACGAA	ATCTACATGCTACTGTGTAAGCCCATTCACAGAAACCAGA	chrX:23501599-23501639	TCGGCTCAATGTTCACTACG
chrX_C4	CGATTACCCGATAGGACGAATATCAGGTGTCCTGGTCTATCATTCTCCCCACCTTGTTCCTCGGCTCAATGTTCACTACG	CGATTACCCGATAGGACGAA	TATCAGGTGTCCTGGTCTATCATTCTCCCCACCTTGTTCC	chrX:23501645-23501685	TCGGCTCAATGTTCACTACG
chrX_C4	CGATTACCCGATAGGACGAAGAAACAAAGTTTCTAATTCACTCTAGAGTTAAGCTGGCATTCGGCTCAATGTTCACTACG	CGATTACCCGATAGGACGAA	GAAACAAAGTTTCTAATTCACTCTAGAGTTAAGCTGGCAT	chrX:23501688-23501728	TCGGCTCAATGTTCACTACG
chrX_C4	CGATTACCCGATAGGACGAAGAGAGAGAGACTGGAATTCAGATCCTCATATCTGTACATCTCGGCTCAATGTTCACTACG	CGATTACCCGATAGGACGAA	GAGAGAGAGACTGGAATTCAGATCCTCATATCTGTACATC	chrX:23501842-23501882	TCGGCTCAATGTTCACTACG
chrX_C4	CGATTACCCGATAGGACGAACACTCCAGCCTCTGTTCTTAACTTTAAATTAAGGATGTGATCGGCTCAATGTTCACTACG	CGATTACCCGATAGGACGAA	CACTCCAGCCTCTGTTCTTAACTTTAAATTAAGGATGTGA	chrX:23501906-23501946	TCGGCTCAATGTTCACTACG
chrX_C4	CGATTACCCGATAGGACGAAGGTTCAAGGAAAGTATGATATGACTAATCACTTCCTAGGTTCGGCTCAATGTTCACTACG	CGATTACCCGATAGGACGAA	GGTTCAAGGAAAGTATGATATGACTAATCACTTCCTAGGT	chrX:23501948-23501988	TCGGCTCAATGTTCACTACG
chrX_C4	CGATTACCCGATAGGACGAATTGTTGCCCTTCCAGAGGACCCACGAGAGCTCAGTTCTTGTCGGCTCAATGTTCACTACG	CGATTACCCGATAGGACGAA	TTGTTGCCCTTCCAGAGGACCCACGAGAGCTCAGTTCTTG	chrX:23502208-23502248	TCGGCTCAATGTTCACTACG
chrX_C4	CGATTACCCGATAGGACGAAGGCCTCTGCAGGCACTGTGGTCATATATTTAGACTCACAATCGGCTCAATGTTCACTACG	CGATTACCCGATAGGACGAA	GGCCTCTGCAGGCACTGTGGTCATATATTTAGACTCACAA	chrX:23502314-23502354	TCGGCTCAATGTTCACTACG
chrX_C4	CGATTACCCGATAGGACGAATTAATTACAACATTTTATCTTCACTTTCCTCCCTCCAAGCTCGGCTCAATGTTCACTACG	CGATTACCCGATAGGACGAA	TTAATTACAACATTTTATCTTCACTTTCCTCCCTCCAAGC	chrX:23502426-23502466	TCGGCTCAATGTTCACTACG
chrX_C4	CGATTACCCGATAGGACGAATTCCCTACACCCCTCCCCGTTCTCCTTCAAATTTATAGCCTCGGCTCAATGTTCACTACG	CGATTACCCGATAGGACGAA	TTCCCTACACCCCTCCCCGTTCTCCTTCAAATTTATAGCC	chrX:23502468-23502508	TCGGCTCAATGTTCACTACG
chrX_C4	CGATTACCCGATAGGACGAATATTCCCAAATATAACCCGTTGAGTCCATATGATCTTGCCTCGGCTCAATGTTCACTACG	CGATTACCCGATAGGACGAA	TATTCCCAAATATAACCCGTTGAGTCCATATGATCTTGCC	chrX:23502556-23502596	TCGGCTCAATGTTCACTACG
chrX_C4	CGATTACCCGATAGGACGAACAACCAATTGGTGTGTTCTCCCCTGGGGTTTTCTTAGCCATCGGCTCAATGTTCACTACG	CGATTACCCGATAGGACGAA	CAACCAATTGGTGTGTTCTCCCCTGGGGTTTTCTTAGCCA	chrX:23502628-23502668	TCGGCTCAATGTTCACTACG
chrX_C4	CGATTACCCGATAGGACGAAGGTATTTCTTTATAAGGTTGAGGCCTTATGAGGTATCCACTCGGCTCAATGTTCACTACG	CGATTACCCGATAGGACGAA	GGTATTTCTTTATAAGGTTGAGGCCTTATGAGGTATCCAC	chrX:23502670-23502710	TCGGCTCAATGTTCACTACG
chrX_C4	CGATTACCCGATAGGACGAAGTCTGGAATGTTCACTAGTTCATTCCTTGTTCAACTCACTTCGGCTCAATGTTCACTACG	CGATTACCCGATAGGACGAA	GTCTGGAATGTTCACTAGTTCATTCCTTGTTCAACTCACT	chrX:23502716-23502756	TCGGCTCAATGTTCACTACG
chrX_C4	CGATTACCCGATAGGACGAAGGACATGTTAGTGAGACATGATGAGTGTAAATCTTAAAACTCGGCTCAATGTTCACTACG	CGATTACCCGATAGGACGAA	GGACATGTTAGTGAGACATGATGAGTGTAAATCTTAAAAC	chrX:23502763-23502803	TCGGCTCAATGTTCACTACG
chrX_C4	CGATTACCCGATAGGACGAATGTTTTGACCAGCAATCATGATGGATTCCATTGTTTCTATCGTCATCGAGCCTGTTCGTA	CGATTACCCGATAGGACGAA	TGTTTTGACCAGCAATCATGATGGATTCCATTGTTTCTAT	chrX:24607299-24607339	CGTCATCGAGCCTGTTCGTA
chrX_C4	CGATTACCCGATAGGACGAAAATTGATGGAAACCCTGATCATAAGGATGATCTCTGCTGCCGTCATCGAGCCTGTTCGTA	CGATTACCCGATAGGACGAA	AATTGATGGAAACCCTGATCATAAGGATGATCTCTGCTGC	chrX:24607345-24607385	CGTCATCGAGCCTGTTCGTA
chrX_C4	CGATTACCCGATAGGACGAATTAAGGTAATTCCATATTTTATGGTCCATACTGACAGTGGCGTCATCGAGCCTGTTCGTA	CGATTACCCGATAGGACGAA	TTAAGGTAATTCCATATTTTATGGTCCATACTGACAGTGG	chrX:24607388-24607428	CGTCATCGAGCCTGTTCGTA
chrX_C4	CGATTACCCGATAGGACGAATACAGGATCTGAGGTGCACTGGAGATCACATTGATATCTGCGTCATCGAGCCTGTTCGTA	CGATTACCCGATAGGACGAA	TACAGGATCTGAGGTGCACTGGAGATCACATTGATATCTG	chrX:24607442-24607482	CGTCATCGAGCCTGTTCGTA
chrX_C4	CGATTACCCGATAGGACGAATTTTGATATCCCTGATGTATGCATGTAGCCCCTTCTCTGGCGTCATCGAGCCTGTTCGTA	CGATTACCCGATAGGACGAA	TTTTGATATCCCTGATGTATGCATGTAGCCCCTTCTCTGG	chrX:24607507-24607547	CGTCATCGAGCCTGTTCGTA
chrX_C4	CGATTACCCGATAGGACGAACATGCGTTCACTAATATATACATCTTTGGAAGACAAATCGCGTCATCGAGCCTGTTCGTA	CGATTACCCGATAGGACGAA	CATGCGTTCACTAATATATACATCTTTGGAAGACAAATCG	chrX:24607549-24607589	CGTCATCGAGCCTGTTCGTA
chrX_C4	CGATTACCCGATAGGACGAATGTCTATACTCTTTGATACCACAAGCAACAATGTTGTCATCGTCATCGAGCCTGTTCGTA	CGATTACCCGATAGGACGAA	TGTCTATACTCTTTGATACCACAAGCAACAATGTTGTCAT	chrX:24607592-24607632	CGTCATCGAGCCTGTTCGTA
chrX_C4	CGATTACCCGATAGGACGAATTTCTCCCATTTAGGGCCACATTAATATGAATGATTCCAACGTCATCGAGCCTGTTCGTA	CGATTACCCGATAGGACGAA	TTTCTCCCATTTAGGGCCACATTAATATGAATGATTCCAA	chrX:24607638-24607678	CGTCATCGAGCCTGTTCGTA
chrX_C4	CGATTACCCGATAGGACGAACATGCTTCTCTCACCTGTGGGAATGTCCTTTATGAGATATCGTCATCGAGCCTGTTCGTA	CGATTACCCGATAGGACGAA	CATGCTTCTCTCACCTGTGGGAATGTCCTTTATGAGATAT	chrX:24607711-24607751	CGTCATCGAGCCTGTTCGTA
chrX_C4	CGATTACCCGATAGGACGAATTTTGAAGTCAATGCTCCATTCTGACACTATAGATGTGATCGTCATCGAGCCTGTTCGTA	CGATTACCCGATAGGACGAA	TTTTGAAGTCAATGCTCCATTCTGACACTATAGATGTGAT	chrX:24607772-24607812	CGTCATCGAGCCTGTTCGTA
chrX_C4	CGATTACCCGATAGGACGAACTGGCAATAGACGCCATGGTATATCCAAGAACTTTGATGCCGTCATCGAGCCTGTTCGTA	CGATTACCCGATAGGACGAA	CTGGCAATAGACGCCATGGTATATCCAAGAACTTTGATGC	chrX:24607866-24607906	CGTCATCGAGCCTGTTCGTA
chrX_C4	CGATTACCCGATAGGACGAATTTGGACCAGATTGTGATACCAATTGTCCTATTTGCTAAGCGTCATCGAGCCTGTTCGTA	CGATTACCCGATAGGACGAA	TTTGGACCAGATTGTGATACCAATTGTCCTATTTGCTAAG	chrX:24607943-24607983	CGTCATCGAGCCTGTTCGTA
chrX_C4	CGATTACCCGATAGGACGAAATGTTGATTTTACTCTCCCATTGTACCATTTGTAACCACACGTCATCGAGCCTGTTCGTA	CGATTACCCGATAGGACGAA	ATGTTGATTTTACTCTCCCATTGTACCATTTGTAACCACA	chrX:24607989-24608029	CGTCATCGAGCCTGTTCGTA
chrX_C4	CGATTACCCGATAGGACGAACTGACTCTGAAGATCTTGGTAATGTCTATGATCACTGTGTCGTCATCGAGCCTGTTCGTA	CGATTACCCGATAGGACGAA	CTGACTCTGAAGATCTTGGTAATGTCTATGATCACTGTGT	chrX:24608033-24608073	CGTCATCGAGCCTGTTCGTA
chrX_C4	CGATTACCCGATAGGACGAAAAAAGCATCAATTATGAAATGCATGGTCAGAACTTCTGCCCGTCATCGAGCCTGTTCGTA	CGATTACCCGATAGGACGAA	AAAAGCATCAATTATGAAATGCATGGTCAGAACTTCTGCC	chrX:24608075-24608115	CGTCATCGAGCCTGTTCGTA
chrX_C4	CGATTACCCGATAGGACGAATCCTATTGGAAACTTGTTTCAAGCCTCTGATGTGACTTATCGTCATCGAGCCTGTTCGTA	CGATTACCCGATAGGACGAA	TCCTATTGGAAACTTGTTTCAAGCCTCTGATGTGACTTAT	chrX:24608145-24608185	CGTCATCGAGCCTGTTCGTA
chrX_C4	CGATTACCCGATAGGACGAAATGTTGCTGTCACTGCTATATGCTGAACCCAGGAAACATGCGTCATCGAGCCTGTTCGTA	CGATTACCCGATAGGACGAA	ATGTTGCTGTCACTGCTATATGCTGAACCCAGGAAACATG	chrX:24608196-24608236	CGTCATCGAGCCTGTTCGTA
chrX_C4	CGATTACCCGATAGGACGAAGGTATCCATAGTTTCTATTCCTTGGAAGACCCTATTGATGCGTCATCGAGCCTGTTCGTA	CGATTACCCGATAGGACGAA	GGTATCCATAGTTTCTATTCCTTGGAAGACCCTATTGATG	chrX:24608238-24608278	CGTCATCGAGCCTGTTCGTA
chrX_C4	CGATTACCCGATAGGACGAAATCTGTTTTGCTGCATGAGAACAGACTTAATTCCAAGGTTCGTCATCGAGCCTGTTCGTA	CGATTACCCGATAGGACGAA	ATCTGTTTTGCTGCATGAGAACAGACTTAATTCCAAGGTT	chrX:24608284-24608324	CGTCATCGAGCCTGTTCGTA
chrX_C4	CGATTACCCGATAGGACGAATTGAGGTGAATGTTCTGAGCTGGCATTGGGGATAAGCTTGCGTCATCGAGCCTGTTCGTA	CGATTACCCGATAGGACGAA	TTGAGGTGAATGTTCTGAGCTGGCATTGGGGATAAGCTTG	chrX:24608348-24608388	CGTCATCGAGCCTGTTCGTA
chrX_C4	CGATTACCCGATAGGACGAAGTCTGAGAGCTTACCTGCTGCTGTCAACTGTGCTGATATACGTCATCGAGCCTGTTCGTA	CGATTACCCGATAGGACGAA	GTCTGAGAGCTTACCTGCTGCTGTCAACTGTGCTGATATA	chrX:24608390-24608430	CGTCATCGAGCCTGTTCGTA
chrX_C4	CGATTACCCGATAGGACGAATTTTAGACCTTGTTTTGGGTTATATCCTTGCTGTTGCAAGCGTCATCGAGCCTGTTCGTA	CGATTACCCGATAGGACGAA	TTTTAGACCTTGTTTTGGGTTATATCCTTGCTGTTGCAAG	chrX:24608454-24608494	CGTCATCGAGCCTGTTCGTA
chrX_C4	CGATTACCCGATAGGACGAAAGATTTGATGTAATTGATCTCTCCTGCCACCAGAGAAAATCGTCATCGAGCCTGTTCGTA	CGATTACCCGATAGGACGAA	AGATTTGATGTAATTGATCTCTCCTGCCACCAGAGAAAAT	chrX:24608497-24608537	CGTCATCGAGCCTGTTCGTA
chrX_C4	CGATTACCCGATAGGACGAAAACTGAATCTTTTCAATATCAGTGATACACTTGTCAGCAGCGTCATCGAGCCTGTTCGTA	CGATTACCCGATAGGACGAA	AACTGAATCTTTTCAATATCAGTGATACACTTGTCAGCAG	chrX:24608549-24608589	CGTCATCGAGCCTGTTCGTA
chrX_C4	CGATTACCCGATAGGACGAATTCTTACCCCTAATAGCAAACATCATAGTAGAGATTTGTGCGTCATCGAGCCTGTTCGTA	CGATTACCCGATAGGACGAA	TTCTTACCCCTAATAGCAAACATCATAGTAGAGATTTGTG	chrX:24608609-24608649	CGTCATCGAGCCTGTTCGTA
chrX_C4	CGATTACCCGATAGGACGAAGCCACTTTGGACCATGATGATATCAGTGATTCCCAACTACCGTCATCGAGCCTGTTCGTA	CGATTACCCGATAGGACGAA	GCCACTTTGGACCATGATGATATCAGTGATTCCCAACTAC	chrX:24608651-24608691	CGTCATCGAGCCTGTTCGTA
chrX_C4	CGATTACCCGATAGGACGAATCCATAGTGCTACATGTAACTCTGTTCATATCTATAGACTCGTCATCGAGCCTGTTCGTA	CGATTACCCGATAGGACGAA	TCCATAGTGCTACATGTAACTCTGTTCATATCTATAGACT	chrX:24608717-24608757	CGTCATCGAGCCTGTTCGTA
chrX_C4	CGATTACCCGATAGGACGAAGCTGCCTATGAAGATCTTGCTAAAATCTAATATCCCTACTCGTCATCGAGCCTGTTCGTA	CGATTACCCGATAGGACGAA	GCTGCCTATGAAGATCTTGCTAAAATCTAATATCCCTACT	chrX:24608759-24608799	CGTCATCGAGCCTGTTCGTA
chrX_C4	CGATTACCCGATAGGACGAATAGAAGACTCTGTCTTGAAATTCTTGGTAACTACTGTTGCCGTCATCGAGCCTGTTCGTA	CGATTACCCGATAGGACGAA	TAGAAGACTCTGTCTTGAAATTCTTGGTAACTACTGTTGC	chrX:24608801-24608841	CGTCATCGAGCCTGTTCGTA
chrX_C4	CGATTACCCGATAGGACGAACTTAAGTGTACTGTGTTACAATCAGTTATGGTTTTCATGCCGTCATCGAGCCTGTTCGTA	CGATTACCCGATAGGACGAA	CTTAAGTGTACTGTGTTACAATCAGTTATGGTTTTCATGC	chrX:24608855-24608895	CGTCATCGAGCCTGTTCGTA
chrX_C4	CGATTACCCGATAGGACGAAACCTGACTGCCTTCTGACATCAGTAATCACGACAGTGATTCGTCATCGAGCCTGTTCGTA	CGATTACCCGATAGGACGAA	ACCTGACTGCCTTCTGACATCAGTAATCACGACAGTGATT	chrX:24608900-24608940	CGTCATCGAGCCTGTTCGTA
chrX_C4	CGATTACCCGATAGGACGAACCTCTCAAGATATTATGGGGCACAGGAATCTATGAAATGTCGTCATCGAGCCTGTTCGTA	CGATTACCCGATAGGACGAA	CCTCTCAAGATATTATGGGGCACAGGAATCTATGAAATGT	chrX:24608946-24608986	CGTCATCGAGCCTGTTCGTA
chrX_C4	CGATTACCCGATAGGACGAAAACCAGAAGAACTGATCACAGTATCATTCATCCATCCTGGCGTCATCGAGCCTGTTCGTA	CGATTACCCGATAGGACGAA	AACCAGAAGAACTGATCACAGTATCATTCATCCATCCTGG	chrX:24609047-24609087	CGTCATCGAGCCTGTTCGTA
chrX_C4	CGATTACCCGATAGGACGAAATGGAGAAGACGCTTATGTTAATACTATTCCCAGGTTCTGCGTCATCGAGCCTGTTCGTA	CGATTACCCGATAGGACGAA	ATGGAGAAGACGCTTATGTTAATACTATTCCCAGGTTCTG	chrX:24609089-24609129	CGTCATCGAGCCTGTTCGTA
chrX_C4	CGATTACCCGATAGGACGAATCTATGCTGATGTCAAAGATACACCTGGAAACAGTAACCACGTCATCGAGCCTGTTCGTA	CGATTACCCGATAGGACGAA	TCTATGCTGATGTCAAAGATACACCTGGAAACAGTAACCA	chrX:24609131-24609171	CGTCATCGAGCCTGTTCGTA
chrX_C4	CGATTACCCGATAGGACGAAAGTATTTTGATATCCATAAACAATGATGGCACTAGCATCCCGTCATCGAGCCTGTTCGTA	CGATTACCCGATAGGACGAA	AGTATTTTGATATCCATAAACAATGATGGCACTAGCATCC	chrX:24609278-24609318	CGTCATCGAGCCTGTTCGTA
chrX_C4	CGATTACCCGATAGGACGAATCTGTGATGCTTTTGATGGAATTGTTCATATCAAGGAGCTCGTCATCGAGCCTGTTCGTA	CGATTACCCGATAGGACGAA	TCTGTGATGCTTTTGATGGAATTGTTCATATCAAGGAGCT	chrX:24609334-24609374	CGTCATCGAGCCTGTTCGTA
chrX_C4	CGATTACCCGATAGGACGAACTGAACTTTAAGGTCAATACTGCTGCTTGAGGTCATGTTTCGTCATCGAGCCTGTTCGTA	CGATTACCCGATAGGACGAA	CTGAACTTTAAGGTCAATACTGCTGCTTGAGGTCATGTTT	chrX:24609395-24609435	CGTCATCGAGCCTGTTCGTA
chrX_C4	CGATTACCCGATAGGACGAATAATGTGGGAAAAGATACCATTGTTGTATGTCCAAAATCCCGTCATCGAGCCTGTTCGTA	CGATTACCCGATAGGACGAA	TAATGTGGGAAAAGATACCATTGTTGTATGTCCAAAATCC	chrX:24609474-24609514	CGTCATCGAGCCTGTTCGTA
chrX_C4	CGATTACCCGATAGGACGAACATGTTCTCTGCTGCCACTTGGAACATTAATACAAGCTACCGTCATCGAGCCTGTTCGTA	CGATTACCCGATAGGACGAA	CATGTTCTCTGCTGCCACTTGGAACATTAATACAAGCTAC	chrX:24609550-24609590	CGTCATCGAGCCTGTTCGTA
chrX_C4	CGATTACCCGATAGGACGAATATATATTGATATCATCAATCCACACTTCTGCCATCTGACCGTCATCGAGCCTGTTCGTA	CGATTACCCGATAGGACGAA	TATATATTGATATCATCAATCCACACTTCTGCCATCTGAC	chrX:24609607-24609647	CGTCATCGAGCCTGTTCGTA
chrX_C4	CGATTACCCGATAGGACGAACATGTTAGGTATATGATGTGTACTGCCAGCTCTAACCAATCGTCATCGAGCCTGTTCGTA	CGATTACCCGATAGGACGAA	CATGTTAGGTATATGATGTGTACTGCCAGCTCTAACCAAT	chrX:24609649-24609689	CGTCATCGAGCCTGTTCGTA
chrX_C4	CGATTACCCGATAGGACGAAGATGTCAAAGGTCTATCCTGCCACTAGAGTGGACATTACTCGTCATCGAGCCTGTTCGTA	CGATTACCCGATAGGACGAA	GATGTCAAAGGTCTATCCTGCCACTAGAGTGGACATTACT	chrX:24609691-24609731	CGTCATCGAGCCTGTTCGTA
chrX_C4	CGATTACCCGATAGGACGAACTATGGTCTTATATGTCCTCTGAAACTGTGTACATGCCAACGTCATCGAGCCTGTTCGTA	CGATTACCCGATAGGACGAA	CTATGGTCTTATATGTCCTCTGAAACTGTGTACATGCCAA	chrX:24609733-24609773	CGTCATCGAGCCTGTTCGTA
chrX_C4	CGATTACCCGATAGGACGAAATACCTCCTGGCAACAAACAACATGGTTCATCTCAGATGACGTCATCGAGCCTGTTCGTA	CGATTACCCGATAGGACGAA	ATACCTCCTGGCAACAAACAACATGGTTCATCTCAGATGA	chrX:24609775-24609815	CGTCATCGAGCCTGTTCGTA
chrX_C4	CGATTACCCGATAGGACGAAGCTGCCATTAGCCACAAGAAGATTAGGGATACTTGCTGGCCGTCATCGAGCCTGTTCGTA	CGATTACCCGATAGGACGAA	GCTGCCATTAGCCACAAGAAGATTAGGGATACTTGCTGGC	chrX:24609817-24609857	CGTCATCGAGCCTGTTCGTA
chrX_C4	CGATTACCCGATAGGACGAAGACCCTATTGATTATATCATTGATCTCAGTTGCATAGGAACGTCATCGAGCCTGTTCGTA	CGATTACCCGATAGGACGAA	GACCCTATTGATTATATCATTGATCTCAGTTGCATAGGAA	chrX:24609863-24609903	CGTCATCGAGCCTGTTCGTA
chrX_C4	CGATTACCCGATAGGACGAATATCTTGATGTCACTTAATCCTGCTGCTTGTGGTAACCATCGTCATCGAGCCTGTTCGTA	CGATTACCCGATAGGACGAA	TATCTTGATGTCACTTAATCCTGCTGCTTGTGGTAACCAT	chrX:24609905-24609945	CGTCATCGAGCCTGTTCGTA
chrX_C4	CGATTACCCGATAGGACGAATTTTGCTCTCAAGAGCTTGGTGATGTCTGTGAGCCCTACTCGTCATCGAGCCTGTTCGTA	CGATTACCCGATAGGACGAA	TTTTGCTCTCAAGAGCTTGGTGATGTCTGTGAGCCCTACT	chrX:24609964-24610004	CGTCATCGAGCCTGTTCGTA
chrX_C4	CGATTACCCGATAGGACGAACACAAGTAACTATAGTGAATTCCTTGATGCATGTATGCAGCGTCATCGAGCCTGTTCGTA	CGATTACCCGATAGGACGAA	CACAAGTAACTATAGTGAATTCCTTGATGCATGTATGCAG	chrX:24610189-24610229	CGTCATCGAGCCTGTTCGTA
chrX_C4	CGATTACCCGATAGGACGAATTTTAACACTAGAATCGCTATTGATGTCAATGATCCATCCCGTCATCGAGCCTGTTCGTA	CGATTACCCGATAGGACGAA	TTTTAACACTAGAATCGCTATTGATGTCAATGATCCATCC	chrX:24610262-24610302	CGTCATCGAGCCTGTTCGTA
chrX_C4	CGATTACCCGATAGGACGAATGGAGAAGAAATTTATTGGCATGATCTCTTCTTCCCTCTGCGTCATCGAGCCTGTTCGTA	CGATTACCCGATAGGACGAA	TGGAGAAGAAATTTATTGGCATGATCTCTTCTTCCCTCTG	chrX:24610308-24610348	CGTCATCGAGCCTGTTCGTA
chrX_C4	CGATTACCCGATAGGACGAACTTGCAATAAACACCATGGAATCTATACTGATGTTGGACCCGTCATCGAGCCTGTTCGTA	CGATTACCCGATAGGACGAA	CTTGCAATAAACACCATGGAATCTATACTGATGTTGGACC	chrX:24610374-24610414	CGTCATCGAGCCTGTTCGTA
chrX_C4	CGATTACCCGATAGGACGAAACTCTGCAACAAATGTGTGTGAGCCCCAGGTTCAGCCTGTCGTCATCGAGCCTGTTCGTA	CGATTACCCGATAGGACGAA	ACTCTGCAACAAATGTGTGTGAGCCCCAGGTTCAGCCTGT	chrX:24610417-24610457	CGTCATCGAGCCTGTTCGTA
chrX_C4	CGATTACCCGATAGGACGAAGCTCCTTAGTTGCTAGTTCAGCATTTGAGAGCCTCAGTGACGTCATCGAGCCTGTTCGTA	CGATTACCCGATAGGACGAA	GCTCCTTAGTTGCTAGTTCAGCATTTGAGAGCCTCAGTGA	chrX:24610461-24610501	CGTCATCGAGCCTGTTCGTA
chrX_C4	CGATTACCCGATAGGACGAAAGTTTGGGCAGTTATTGCTTTGCCATTGCATTAGTGTTTTCGTCATCGAGCCTGTTCGTA	CGATTACCCGATAGGACGAA	AGTTTGGGCAGTTATTGCTTTGCCATTGCATTAGTGTTTT	chrX:24610746-24610786	CGTCATCGAGCCTGTTCGTA
chrX_C4	CGATTACCCGATAGGACGAATCCAAAGTTTGAAAATATGTTGGTGTGACGATAGCTTCACCGTCATCGAGCCTGTTCGTA	CGATTACCCGATAGGACGAA	TCCAAAGTTTGAAAATATGTTGGTGTGACGATAGCTTCAC	chrX:24610833-24610873	CGTCATCGAGCCTGTTCGTA
chrX_C4	CGATTACCCGATAGGACGAATCCTACATAGACACAAGAGGTGGACCATTCAGATTCCATACGTCATCGAGCCTGTTCGTA	CGATTACCCGATAGGACGAA	TCCTACATAGACACAAGAGGTGGACCATTCAGATTCCATA	chrX:24610879-24610919	CGTCATCGAGCCTGTTCGTA
chrX_C4	CGATTACCCGATAGGACGAAATAGTTAAGATCATCCACTTTGATATTTGAGTACCTTCCCCGTCATCGAGCCTGTTCGTA	CGATTACCCGATAGGACGAA	ATAGTTAAGATCATCCACTTTGATATTTGAGTACCTTCCC	chrX:24610936-24610976	CGTCATCGAGCCTGTTCGTA
chrX_C4	CGATTACCCGATAGGACGAATCCCAGGTCTCAGTCTCATCCTCAACATGCCACACCCCTACGTCATCGAGCCTGTTCGTA	CGATTACCCGATAGGACGAA	TCCCAGGTCTCAGTCTCATCCTCAACATGCCACACCCCTA	chrX:24610978-24611018	CGTCATCGAGCCTGTTCGTA
chrX_C4	CGATTACCCGATAGGACGAACTCTATACCCCTGCAAGTTTCAGTTTTCTCTTCATTCTCACGTCATCGAGCCTGTTCGTA	CGATTACCCGATAGGACGAA	CTCTATACCCCTGCAAGTTTCAGTTTTCTCTTCATTCTCA	chrX:24611020-24611060	CGTCATCGAGCCTGTTCGTA
chrX_C4	CGATTACCCGATAGGACGAAGTCATCTAGAAATCTACCCTGCCCCTACTCACACTGGATTCGTCATCGAGCCTGTTCGTA	CGATTACCCGATAGGACGAA	GTCATCTAGAAATCTACCCTGCCCCTACTCACACTGGATT	chrX:24611062-24611102	CGTCATCGAGCCTGTTCGTA
chrX_C4	CGATTACCCGATAGGACGAAGAACACTGCCATGTCATTACCCATTCTTTCTCTCACTCACCGTCATCGAGCCTGTTCGTA	CGATTACCCGATAGGACGAA	GAACACTGCCATGTCATTACCCATTCTTTCTCTCACTCAC	chrX:24611104-24611144	CGTCATCGAGCCTGTTCGTA
chrX_C4	CGATTACCCGATAGGACGAAGTCTGGATTAACTAGCTCAATATGATATTCTCCATTCCATCGTCATCGAGCCTGTTCGTA	CGATTACCCGATAGGACGAA	GTCTGGATTAACTAGCTCAATATGATATTCTCCATTCCAT	chrX:24611318-24611358	CGTCATCGAGCCTGTTCGTA
chrX_C4	CGATTACCCGATAGGACGAACATGGTTGAGCAAGTGTCCTTTTGGGGACAGTGGAGTATCCGTCATCGAGCCTGTTCGTA	CGATTACCCGATAGGACGAA	CATGGTTGAGCAAGTGTCCTTTTGGGGACAGTGGAGTATC	chrX:24611508-24611548	CGTCATCGAGCCTGTTCGTA
chrX_C4	CGATTACCCGATAGGACGAATGCACAGGAGTGGTATAGCTGGCTCTTGAATAGAACTTGACGTCATCGAGCCTGTTCGTA	CGATTACCCGATAGGACGAA	TGCACAGGAGTGGTATAGCTGGCTCTTGAATAGAACTTGA	chrX:24611559-24611599	CGTCATCGAGCCTGTTCGTA
chrX_C4	CGATTACCCGATAGGACGAACCAATGTTTATGCAGAAGTTTGCAGTTCCGCCAGCAATTGCGTCATCGAGCCTGTTCGTA	CGATTACCCGATAGGACGAA	CCAATGTTTATGCAGAAGTTTGCAGTTCCGCCAGCAATTG	chrX:24611640-24611680	CGTCATCGAGCCTGTTCGTA
chrX_C4	CGATTACCCGATAGGACGAAGGAACTTGTTTCCTGTACCAATGTGTAGAACCTATTTCCTCGTCATCGAGCCTGTTCGTA	CGATTACCCGATAGGACGAA	GGAACTTGTTTCCTGTACCAATGTGTAGAACCTATTTCCT	chrX:24612108-24612148	CGTCATCGAGCCTGTTCGTA
chrX_C4	CGATTACCCGATAGGACGAATGGTCCATTTGTACTTCAGTTTTATGCATGATATATGTGGCGTCATCGAGCCTGTTCGTA	CGATTACCCGATAGGACGAA	TGGTCCATTTGTACTTCAGTTTTATGCATGATATATGTGG	chrX:24612196-24612236	CGTCATCGAGCCTGTTCGTA
chrX_C4	CGATTACCCGATAGGACGAAAGCAGTATTTGTTGAAGATGCCTCCATTTTCCATGTATTCCGTCATCGAGCCTGTTCGTA	CGATTACCCGATAGGACGAA	AGCAGTATTTGTTGAAGATGCCTCCATTTTCCATGTATTC	chrX:24612277-24612317	CGTCATCGAGCCTGTTCGTA
chrX_C4	CGATTACCCGATAGGACGAATTGTGGGGCCATCTCAGGATCGTCCATTCAATTTAATTGACGTCATCGAGCCTGTTCGTA	CGATTACCCGATAGGACGAA	TTGTGGGGCCATCTCAGGATCGTCCATTCAATTTAATTGA	chrX:24612354-24612394	CGTCATCGAGCCTGTTCGTA
chrX_C4	CGATTACCCGATAGGACGAATTCTCTGTATTATAAATCAAGGACAGGTATGGTGGTACCTCGTCATCGAGCCTGTTCGTA	CGATTACCCGATAGGACGAA	TTCTCTGTATTATAAATCAAGGACAGGTATGGTGGTACCT	chrX:24612441-24612481	CGTCATCGAGCCTGTTCGTA
chrX_C4	CGATTACCCGATAGGACGAAACTGCCCCATGAGCATTGAAGATCTTTCCATTTCTGATATCGTCATCGAGCCTGTTCGTA	CGATTACCCGATAGGACGAA	ACTGCCCCATGAGCATTGAAGATCTTTCCATTTCTGATAT	chrX:24612656-24612696	CGTCATCGAGCCTGTTCGTA
chrX_C4	CGATTACCCGATAGGACGAACCCATTTATCATTTATCAAAGGAGGGCAGGCTATGTATTACGTCATCGAGCCTGTTCGTA	CGATTACCCGATAGGACGAA	CCCATTTATCATTTATCAAAGGAGGGCAGGCTATGTATTA	chrX:24612835-24612875	CGTCATCGAGCCTGTTCGTA
chrX_C4	CGATTACCCGATAGGACGAAATTCAGCTGTTTTGCTGGAGGTGTTTATCAGCTTGCTTATCGTCATCGAGCCTGTTCGTA	CGATTACCCGATAGGACGAA	ATTCAGCTGTTTTGCTGGAGGTGTTTATCAGCTTGCTTAT	chrX:24612893-24612933	CGTCATCGAGCCTGTTCGTA
chrX_C4	CGATTACCCGATAGGACGAAGAACTCCATCAGTTAACTTATTGCTCTGGGTAGAAAGTTTCGTCATCGAGCCTGTTCGTA	CGATTACCCGATAGGACGAA	GAACTCCATCAGTTAACTTATTGCTCTGGGTAGAAAGTTT	chrX:24612999-24613039	CGTCATCGAGCCTGTTCGTA
chrX_C4	CGATTACCCGATAGGACGAATAAATAAATAGTGAGTGAGTGGGGTACATTCATTTGTCTCCGTCATCGAGCCTGTTCGTA	CGATTACCCGATAGGACGAA	TAAATAAATAGTGAGTGAGTGGGGTACATTCATTTGTCTC	chrX:24613049-24613089	CGTCATCGAGCCTGTTCGTA
chrX_C4	CGATTACCCGATAGGACGAAATATCCCCGATCTCAAACTTTTGACATGAAGGGGTGGTGACGTCATCGAGCCTGTTCGTA	CGATTACCCGATAGGACGAA	ATATCCCCGATCTCAAACTTTTGACATGAAGGGGTGGTGA	chrX:24613186-24613226	CGTCATCGAGCCTGTTCGTA
chrX_C4	CGATTACCCGATAGGACGAATCATGGATGATAGTCTTGATGTATTTCTGAATGGGGTCAACGTCATCGAGCCTGTTCGTA	CGATTACCCGATAGGACGAA	TCATGGATGATAGTCTTGATGTATTTCTGAATGGGGTCAA	chrX:24613367-24613407	CGTCATCGAGCCTGTTCGTA
chrX_C4	CGATTACCCGATAGGACGAAGCTGGTGAGAATGTAGAACCCAAGGAACACTCTCCCTTATCGTCATCGAGCCTGTTCGTA	CGATTACCCGATAGGACGAA	GCTGGTGAGAATGTAGAACCCAAGGAACACTCTCCCTTAT	chrX:24613529-24613569	CGTCATCGAGCCTGTTCGTA
chrX_C4	CGATTACCCGATAGGACGAAGGCCATGTGCTCCACTAGTTCATAGTAGCCTTACGTGTAACGTCATCGAGCCTGTTCGTA	CGATTACCCGATAGGACGAA	GGCCATGTGCTCCACTAGTTCATAGTAGCCTTACGTGTAA	chrX:24613708-24613748	CGTCATCGAGCCTGTTCGTA
chrX_C4	CGATTACCCGATAGGACGAAGAAATTTAACAACAGAAAAGCACAAGTGAGGATTCTTCAGCGTCATCGAGCCTGTTCGTA	CGATTACCCGATAGGACGAA	GAAATTTAACAACAGAAAAGCACAAGTGAGGATTCTTCAG	chrX:24614002-24614042	CGTCATCGAGCCTGTTCGTA
chrX_C4	CGATTACCCGATAGGACGAAAGATGGAACAGAAATGGGAACAGGATCAGTTAGGTGGGACCGTCATCGAGCCTGTTCGTA	CGATTACCCGATAGGACGAA	AGATGGAACAGAAATGGGAACAGGATCAGTTAGGTGGGAC	chrX:24614110-24614150	CGTCATCGAGCCTGTTCGTA
chrX_C4	CGATTACCCGATAGGACGAAAGTGGTAGAAGAATGAGTGGAAATATGCAGGTTTCAGGGTCGTCATCGAGCCTGTTCGTA	CGATTACCCGATAGGACGAA	AGTGGTAGAAGAATGAGTGGAAATATGCAGGTTTCAGGGT	chrX:24614165-24614205	CGTCATCGAGCCTGTTCGTA
chrX_C4	CGATTACCCGATAGGACGAAGGTCGAGGTACCATGGACCTCTAGAAAGTGCCATGGACCTCGTCATCGAGCCTGTTCGTA	CGATTACCCGATAGGACGAA	GGTCGAGGTACCATGGACCTCTAGAAAGTGCCATGGACCT	chrX:24614207-24614247	CGTCATCGAGCCTGTTCGTA
chrX_C4	CGATTACCCGATAGGACGAAGAGATAAGACTCTCAGGACTTAGTGATATGCTCAACAGTGCGTCATCGAGCCTGTTCGTA	CGATTACCCGATAGGACGAA	GAGATAAGACTCTCAGGACTTAGTGATATGCTCAACAGTG	chrX:24614249-24614289	CGTCATCGAGCCTGTTCGTA
chrX_C4	CGATTACCCGATAGGACGAAGCTGACAGACAGGAGCCTAGCATTGTTTGGCCTCCTAGAACGTCATCGAGCCTGTTCGTA	CGATTACCCGATAGGACGAA	GCTGACAGACAGGAGCCTAGCATTGTTTGGCCTCCTAGAA	chrX:24614516-24614556	CGTCATCGAGCCTGTTCGTA
chrX_C4	CGATTACCCGATAGGACGAACCAGCTGAATGATTCAGTTGCAGATACTTATACTTAGAAACGTCATCGAGCCTGTTCGTA	CGATTACCCGATAGGACGAA	CCAGCTGAATGATTCAGTTGCAGATACTTATACTTAGAAA	chrX:24614565-24614605	CGTCATCGAGCCTGTTCGTA
chrX_C4	CGATTACCCGATAGGACGAAATACCAGTAGTATCAACTAATGTGGATGCCTAGAAACTCCCGTCATCGAGCCTGTTCGTA	CGATTACCCGATAGGACGAA	ATACCAGTAGTATCAACTAATGTGGATGCCTAGAAACTCC	chrX:24614683-24614723	CGTCATCGAGCCTGTTCGTA
chrX_C4	CGATTACCCGATAGGACGAACAAGGCAGCATGCCAGAGCTGGCTGGAGTACCCTGACACACGTCATCGAGCCTGTTCGTA	CGATTACCCGATAGGACGAA	CAAGGCAGCATGCCAGAGCTGGCTGGAGTACCCTGACACA	chrX:24614741-24614781	CGTCATCGAGCCTGTTCGTA
chrX_C4	CGATTACCCGATAGGACGAACCCATCCCTCAACCATGCCAACCTCTGGATATGGTCTTTACGTCATCGAGCCTGTTCGTA	CGATTACCCGATAGGACGAA	CCCATCCCTCAACCATGCCAACCTCTGGATATGGTCTTTA	chrX:24615488-24615528	CGTCATCGAGCCTGTTCGTA
chrX_C4	CGATTACCCGATAGGACGAAGGTTCTCTCTCCCCTTTCGTGGTATATTTTGGCTAATGTACGTCATCGAGCCTGTTCGTA	CGATTACCCGATAGGACGAA	GGTTCTCTCTCCCCTTTCGTGGTATATTTTGGCTAATGTA	chrX:24615530-24615570	CGTCATCGAGCCTGTTCGTA
chrX_C4	CGATTACCCGATAGGACGAATGAGTTCCTTGCTTTTGGCATTGGGGACTTTCTGGTTGCTCGTCATCGAGCCTGTTCGTA	CGATTACCCGATAGGACGAA	TGAGTTCCTTGCTTTTGGCATTGGGGACTTTCTGGTTGCT	chrX:24615587-24615627	CGTCATCGAGCCTGTTCGTA
chrX_C4	CGATTACCCGATAGGACGAACTATTGCTATACACTGCTATTCAGGTTCCTGACCCACATTCGTCATCGAGCCTGTTCGTA	CGATTACCCGATAGGACGAA	CTATTGCTATACACTGCTATTCAGGTTCCTGACCCACATT	chrX:24615646-24615686	CGTCATCGAGCCTGTTCGTA
chrX_C4	CGATTACCCGATAGGACGAATTTTCACCTACCCCTCTTCTCTTACATCACAGTCCCTTTCCGTCATCGAGCCTGTTCGTA	CGATTACCCGATAGGACGAA	TTTTCACCTACCCCTCTTCTCTTACATCACAGTCCCTTTC	chrX:24615726-24615766	CGTCATCGAGCCTGTTCGTA
chrX_C4	CGATTACCCGATAGGACGAATCCCTTTCTATGTAGGGCTTAAGCATTCACACTGGTCTTCCGTCATCGAGCCTGTTCGTA	CGATTACCCGATAGGACGAA	TCCCTTTCTATGTAGGGCTTAAGCATTCACACTGGTCTTC	chrX:24615796-24615836	CGTCATCGAGCCTGTTCGTA
chrX_C4	CCGAAGTTATTTAAGGGCGTGGTATATGCCAAGAGTTATATAGTCGAATCTTTAGGGAAACGGTACATCCATATTCTCGG	CCGAAGTTATTTAAGGGCGT	GGTATATGCCAAGAGTTATATAGTCGAATCTTTAGGGAAA	chrX:24052796-24052836	CGGTACATCCATATTCTCGG
chrX_C4	CCGAAGTTATTTAAGGGCGTTCTGAGTAATTACCACATTTAATTTTAGCCCAAGATCTGGCGGTACATCCATATTCTCGG	CCGAAGTTATTTAAGGGCGT	TCTGAGTAATTACCACATTTAATTTTAGCCCAAGATCTGG	chrX:24052850-24052890	CGGTACATCCATATTCTCGG
chrX_C4	CCGAAGTTATTTAAGGGCGTTTCTACTTCCCTAACCAGTTTTCTTAGATGCCTATAGAAACGGTACATCCATATTCTCGG	CCGAAGTTATTTAAGGGCGT	TTCTACTTCCCTAACCAGTTTTCTTAGATGCCTATAGAAA	chrX:24052892-24052932	CGGTACATCCATATTCTCGG
chrX_C4	CCGAAGTTATTTAAGGGCGTCACCATTTAGTCTATTCATTTTCTTGGTTCCCAAGTGCTCCGGTACATCCATATTCTCGG	CCGAAGTTATTTAAGGGCGT	CACCATTTAGTCTATTCATTTTCTTGGTTCCCAAGTGCTC	chrX:24052934-24052974	CGGTACATCCATATTCTCGG
chrX_C4	CCGAAGTTATTTAAGGGCGTTTGGTGTGCTCGACTTCTAGTCTCTTTCTCTTGCTCTTCTCGGTACATCCATATTCTCGG	CCGAAGTTATTTAAGGGCGT	TTGGTGTGCTCGACTTCTAGTCTCTTTCTCTTGCTCTTCT	chrX:24052976-24053016	CGGTACATCCATATTCTCGG
chrX_C4	CCGAAGTTATTTAAGGGCGTATTCCCTCCTTCTCTCAACTTCTACCTACTCTCTTTTCTTCGGTACATCCATATTCTCGG	CCGAAGTTATTTAAGGGCGT	ATTCCCTCCTTCTCTCAACTTCTACCTACTCTCTTTTCTT	chrX:24053018-24053058	CGGTACATCCATATTCTCGG
chrX_C4	CCGAAGTTATTTAAGGGCGTATCCTGGTTCACTCTGGATACTTCTAGATGTCTCTGACATCGGTACATCCATATTCTCGG	CCGAAGTTATTTAAGGGCGT	ATCCTGGTTCACTCTGGATACTTCTAGATGTCTCTGACAT	chrX:24053060-24053100	CGGTACATCCATATTCTCGG
chrX_C4	CCGAAGTTATTTAAGGGCGTTATTCATATCTATATAAAGCCTCCTTAGCTATCCCAGAAGCGGTACATCCATATTCTCGG	CCGAAGTTATTTAAGGGCGT	TATTCATATCTATATAAAGCCTCCTTAGCTATCCCAGAAG	chrX:24053104-24053144	CGGTACATCCATATTCTCGG
chrX_C4	CCGAAGTTATTTAAGGGCGTAGGGTTGCTCCTAGGCATGGTTGAGGAGAATGAATGTATACGGTACATCCATATTCTCGG	CCGAAGTTATTTAAGGGCGT	AGGGTTGCTCCTAGGCATGGTTGAGGAGAATGAATGTATA	chrX:24053184-24053224	CGGTACATCCATATTCTCGG
chrX_C4	CCGAAGTTATTTAAGGGCGTTATATGAGGGAGAAAACAGCCAGAGGCATATACCTGGAAGCGGTACATCCATATTCTCGG	CCGAAGTTATTTAAGGGCGT	TATATGAGGGAGAAAACAGCCAGAGGCATATACCTGGAAG	chrX:24053232-24053272	CGGTACATCCATATTCTCGG
chrX_C4	CCGAAGTTATTTAAGGGCGTTCCAGAAGGAATGTATATAGCATAATGAACTGAGCTGGGACGGTACATCCATATTCTCGG	CCGAAGTTATTTAAGGGCGT	TCCAGAAGGAATGTATATAGCATAATGAACTGAGCTGGGA	chrX:24053274-24053314	CGGTACATCCATATTCTCGG
chrX_C4	CCGAAGTTATTTAAGGGCGTAAGGAACAAATAGATAGACTGGGGAGAGCAAAAGAGAAGACGGTACATCCATATTCTCGG	CCGAAGTTATTTAAGGGCGT	AAGGAACAAATAGATAGACTGGGGAGAGCAAAAGAGAAGA	chrX:24053316-24053356	CGGTACATCCATATTCTCGG
chrX_C4	CCGAAGTTATTTAAGGGCGTGAAGGCCAATCAGACTAAGAGTTATACATGACTGGAGGCACGGTACATCCATATTCTCGG	CCGAAGTTATTTAAGGGCGT	GAAGGCCAATCAGACTAAGAGTTATACATGACTGGAGGCA	chrX:24053358-24053398	CGGTACATCCATATTCTCGG
chrX_C4	CCGAAGTTATTTAAGGGCGTCCAGAGAACCAAGAGTGCATATAGCTATAATGGCTGAATCCGGTACATCCATATTCTCGG	CCGAAGTTATTTAAGGGCGT	CCAGAGAACCAAGAGTGCATATAGCTATAATGGCTGAATC	chrX:24053400-24053440	CGGTACATCCATATTCTCGG
chrX_C4	CCGAAGTTATTTAAGGGCGTAGAGGGATCAGCATCTGGAGAACAGAGGAAAACTTTTCTCCGGTACATCCATATTCTCGG	CCGAAGTTATTTAAGGGCGT	AGAGGGATCAGCATCTGGAGAACAGAGGAAAACTTTTCTC	chrX:24053442-24053482	CGGTACATCCATATTCTCGG
chrX_C4	CCGAAGTTATTTAAGGGCGTGTGCTCCAAAGGTTTACCATTGAGGGCCAGGGTGAGAAGTCGGTACATCCATATTCTCGG	CCGAAGTTATTTAAGGGCGT	GTGCTCCAAAGGTTTACCATTGAGGGCCAGGGTGAGAAGT	chrX:24053484-24053524	CGGTACATCCATATTCTCGG
chrX_C4	CCGAAGTTATTTAAGGGCGTAACATGATTGAGCAAGTGCCCTCATGGTACAACAGTTCGGCGGTACATCCATATTCTCGG	CCGAAGTTATTTAAGGGCGT	AACATGATTGAGCAAGTGCCCTCATGGTACAACAGTTCGG	chrX:24053645-24053685	CGGTACATCCATATTCTCGG
chrX_C4	CCGAAGTTATTTAAGGGCGTGCAATGCAAAACAATTGCTTTGAGGAAGCAGAAGTCAGAACGGTACATCCATATTCTCGG	CCGAAGTTATTTAAGGGCGT	GCAATGCAAAACAATTGCTTTGAGGAAGCAGAAGTCAGAA	chrX:24053804-24053844	CGGTACATCCATATTCTCGG
chrX_C4	CCGAAGTTATTTAAGGGCGTGAAATGGTCATTAAGTGTATCCATACTACATTTCCACTAGCGGTACATCCATATTCTCGG	CCGAAGTTATTTAAGGGCGT	GAAATGGTCATTAAGTGTATCCATACTACATTTCCACTAG	chrX:24053852-24053892	CGGTACATCCATATTCTCGG
chrX_C4	CCGAAGTTATTTAAGGGCGTTGTCACTTGTAGAATATATAGGTCGTTTCCTTTTCTTAGCCGGTACATCCATATTCTCGG	CCGAAGTTATTTAAGGGCGT	TGTCACTTGTAGAATATATAGGTCGTTTCCTTTTCTTAGC	chrX:24053897-24053937	CGGTACATCCATATTCTCGG
chrX_C4	CCGAAGTTATTTAAGGGCGTTTGTGAAGAGAGCAGCATGTATCTGTGGAGAAGGAGAATACGGTACATCCATATTCTCGG	CCGAAGTTATTTAAGGGCGT	TTGTGAAGAGAGCAGCATGTATCTGTGGAGAAGGAGAATA	chrX:24053939-24053979	CGGTACATCCATATTCTCGG
chrX_C4	CCGAAGTTATTTAAGGGCGTTTTACCTTCAGAATACTACTCCATGCTTATTTCCACAATGCGGTACATCCATATTCTCGG	CCGAAGTTATTTAAGGGCGT	TTTACCTTCAGAATACTACTCCATGCTTATTTCCACAATG	chrX:24054033-24054073	CGGTACATCCATATTCTCGG
chrX_C4	CCGAAGTTATTTAAGGGCGTCCCACCAGGCAGCAATCCCAACAACATGAGTGAGTGTTTCCGGTACATCCATATTCTCGG	CCGAAGTTATTTAAGGGCGT	CCCACCAGGCAGCAATCCCAACAACATGAGTGAGTGTTTC	chrX:24054075-24054115	CGGTACATCCATATTCTCGG
chrX_C4	CCGAAGTTATTTAAGGGCGTCATTGTTGGTTGTTTTGTGGATATTTGCCATTCTACCTTACGGTACATCCATATTCTCGG	CCGAAGTTATTTAAGGGCGT	CATTGTTGGTTGTTTTGTGGATATTTGCCATTCTACCTTA	chrX:24054145-24054185	CGGTACATCCATATTCTCGG
chrX_C4	CCGAAGTTATTTAAGGGCGTTTTCTCTTATGCTTCCTCTATACAAACTTCCTATATACCCCGGTACATCCATATTCTCGG	CCGAAGTTATTTAAGGGCGT	TTTCTCTTATGCTTCCTCTATACAAACTTCCTATATACCC	chrX:24054347-24054387	CGGTACATCCATATTCTCGG
chrX_C4	CCGAAGTTATTTAAGGGCGTACTCCTCTATATAATAAATTGCTAGCAGAGAATCTCTCACCGGTACATCCATATTCTCGG	CCGAAGTTATTTAAGGGCGT	ACTCCTCTATATAATAAATTGCTAGCAGAGAATCTCTCAC	chrX:24054484-24054524	CGGTACATCCATATTCTCGG
chrX_C4	CCGAAGTTATTTAAGGGCGTTCTTTGGGTTTCCCTTTTACCTGAAGAACTATTTGTTTAGCGGTACATCCATATTCTCGG	CCGAAGTTATTTAAGGGCGT	TCTTTGGGTTTCCCTTTTACCTGAAGAACTATTTGTTTAG	chrX:24054526-24054566	CGGTACATCCATATTCTCGG
chrX_C4	CCGAAGTTATTTAAGGGCGTTTTTGGGTAAATTCAGCCCTATTGAGAAATGCCTTTTGACCGGTACATCCATATTCTCGG	CCGAAGTTATTTAAGGGCGT	TTTTGGGTAAATTCAGCCCTATTGAGAAATGCCTTTTGAC	chrX:24054612-24054652	CGGTACATCCATATTCTCGG
chrX_C4	CCGAAGTTATTTAAGGGCGTAAGCTAATTGAAAATCTTTCCTCATTGCTGGTTACTACACCGGTACATCCATATTCTCGG	CCGAAGTTATTTAAGGGCGT	AAGCTAATTGAAAATCTTTCCTCATTGCTGGTTACTACAC	chrX:24054700-24054740	CGGTACATCCATATTCTCGG
chrX_C4	CCGAAGTTATTTAAGGGCGTGGTATTCGGGATCACAGAGAAGTTCTGATCCTTTCTTGGTCGGTACATCCATATTCTCGG	CCGAAGTTATTTAAGGGCGT	GGTATTCGGGATCACAGAGAAGTTCTGATCCTTTCTTGGT	chrX:24054742-24054782	CGGTACATCCATATTCTCGG
chrX_C4	CCGAAGTTATTTAAGGGCGTTTTGTTAGGTGCTGCTGCTAATGTGCTGAATTTTATGACACGGTACATCCATATTCTCGG	CCGAAGTTATTTAAGGGCGT	TTTGTTAGGTGCTGCTGCTAATGTGCTGAATTTTATGACA	chrX:24054941-24054981	CGGTACATCCATATTCTCGG
chrX_C4	CCGAAGTTATTTAAGGGCGTTTTTATAATCAAGTCAATGGTGCTAAGGTCTTGGATCCTACGGTACATCCATATTCTCGG	CCGAAGTTATTTAAGGGCGT	TTTTATAATCAAGTCAATGGTGCTAAGGTCTTGGATCCTA	chrX:24054991-24055031	CGGTACATCCATATTCTCGG
chrX_C4	CCGAAGTTATTTAAGGGCGTGGACTCATCCATGTCTAATGAAGTGTGGTTGGTCCTAAGACGGTACATCCATATTCTCGG	CCGAAGTTATTTAAGGGCGT	GGACTCATCCATGTCTAATGAAGTGTGGTTGGTCCTAAGA	chrX:24055088-24055128	CGGTACATCCATATTCTCGG
chrX_C4	CCGAAGTTATTTAAGGGCGTTGAATTTATGCTGTTCCTGAATTGATTGGCAAAAGAACAGCGGTACATCCATATTCTCGG	CCGAAGTTATTTAAGGGCGT	TGAATTTATGCTGTTCCTGAATTGATTGGCAAAAGAACAG	chrX:24055142-24055182	CGGTACATCCATATTCTCGG
chrX_C4	CCGAAGTTATTTAAGGGCGTAAAATCTCCTGATGGCTTAGCATAGAAAGAGCATGTTTCTCGGTACATCCATATTCTCGG	CCGAAGTTATTTAAGGGCGT	AAAATCTCCTGATGGCTTAGCATAGAAAGAGCATGTTTCT	chrX:24055252-24055292	CGGTACATCCATATTCTCGG
chrX_C4	CCGAAGTTATTTAAGGGCGTTACATAGTCCCCTTTACCTTATGAGAAGCACGTATAAGCTCGGTACATCCATATTCTCGG	CCGAAGTTATTTAAGGGCGT	TACATAGTCCCCTTTACCTTATGAGAAGCACGTATAAGCT	chrX:24055302-24055342	CGGTACATCCATATTCTCGG
chrX_C4	CCGAAGTTATTTAAGGGCGTTTAATATTTCTAGGACCAGAACAACATGTGTTGTGGAAAGCGGTACATCCATATTCTCGG	CCGAAGTTATTTAAGGGCGT	TTAATATTTCTAGGACCAGAACAACATGTGTTGTGGAAAG	chrX:24055389-24055429	CGGTACATCCATATTCTCGG
chrX_C4	CCGAAGTTATTTAAGGGCGTAGAAGAGGCACATTTAATCAAACCATTAGTACATGAAACCCGGTACATCCATATTCTCGG	CCGAAGTTATTTAAGGGCGT	AGAAGAGGCACATTTAATCAAACCATTAGTACATGAAACC	chrX:24055433-24055473	CGGTACATCCATATTCTCGG
chrX_C4	CCGAAGTTATTTAAGGGCGTCGAAGTAGTCTCAGTAACATGGCTATTGTCCAGATAAGATCGGTACATCCATATTCTCGG	CCGAAGTTATTTAAGGGCGT	CGAAGTAGTCTCAGTAACATGGCTATTGTCCAGATAAGAT	chrX:24055475-24055515	CGGTACATCCATATTCTCGG
chrX_C4	CCGAAGTTATTTAAGGGCGTAATAGTCATCAGGTTAAGGACAAGGGGCTAGGTTAAAGTGCGGTACATCCATATTCTCGG	CCGAAGTTATTTAAGGGCGT	AATAGTCATCAGGTTAAGGACAAGGGGCTAGGTTAAAGTG	chrX:24055532-24055572	CGGTACATCCATATTCTCGG
chrX_C4	CCGAAGTTATTTAAGGGCGTATTAGACAATGTTCATCCACTTATGCTAATTTATGCTGCCCGGTACATCCATATTCTCGG	CCGAAGTTATTTAAGGGCGT	ATTAGACAATGTTCATCCACTTATGCTAATTTATGCTGCC	chrX:24055579-24055619	CGGTACATCCATATTCTCGG
chrX_C4	CCGAAGTTATTTAAGGGCGTCATACAAATTGACTTTTGTCACTTAATAGGCAGGCAGTTTCGGTACATCCATATTCTCGG	CCGAAGTTATTTAAGGGCGT	CATACAAATTGACTTTTGTCACTTAATAGGCAGGCAGTTT	chrX:24055621-24055661	CGGTACATCCATATTCTCGG
chrX_C4	CCGAAGTTATTTAAGGGCGTCCCAGTTTTCTTGGCAGATTTCTGACTAGTAATGATCAACCGGTACATCCATATTCTCGG	CCGAAGTTATTTAAGGGCGT	CCCAGTTTTCTTGGCAGATTTCTGACTAGTAATGATCAAC	chrX:24055695-24055735	CGGTACATCCATATTCTCGG
chrX_C4	CCGAAGTTATTTAAGGGCGTTATCCCCAGGGTCCCATTCTGTGACACAGAATCTTGACTTCGGTACATCCATATTCTCGG	CCGAAGTTATTTAAGGGCGT	TATCCCCAGGGTCCCATTCTGTGACACAGAATCTTGACTT	chrX:24055737-24055777	CGGTACATCCATATTCTCGG
chrX_C4	CCGAAGTTATTTAAGGGCGTCTGGTTTCACTTGTTTCCTAAAGGCCAGAAAATGTTTTATCGGTACATCCATATTCTCGG	CCGAAGTTATTTAAGGGCGT	CTGGTTTCACTTGTTTCCTAAAGGCCAGAAAATGTTTTAT	chrX:24055779-24055819	CGGTACATCCATATTCTCGG
chrX_C4	CCGAAGTTATTTAAGGGCGTGGAAGGAAACTTTATTTCTATATATCTGCCTGGTTTTAGGCGGTACATCCATATTCTCGG	CCGAAGTTATTTAAGGGCGT	GGAAGGAAACTTTATTTCTATATATCTGCCTGGTTTTAGG	chrX:24055884-24055924	CGGTACATCCATATTCTCGG
chrX_C4	CCGAAGTTATTTAAGGGCGTTAACTGAAACTTTTGCAATAAAACTGTTTCTGGGTTGCAGCGGTACATCCATATTCTCGG	CCGAAGTTATTTAAGGGCGT	TAACTGAAACTTTTGCAATAAAACTGTTTCTGGGTTGCAG	chrX:24055938-24055978	CGGTACATCCATATTCTCGG
chrX_C4	CCGAAGTTATTTAAGGGCGTAGAATTGTAAACTCTGTGTTCCTGTTTCAAAAGACAATCCCGGTACATCCATATTCTCGG	CCGAAGTTATTTAAGGGCGT	AGAATTGTAAACTCTGTGTTCCTGTTTCAAAAGACAATCC	chrX:24055993-24056033	CGGTACATCCATATTCTCGG
chrX_C4	CCGAAGTTATTTAAGGGCGTCTCTTTCCTTTTGCCACTACAACCATACAATTAAAATCGACGGTACATCCATATTCTCGG	CCGAAGTTATTTAAGGGCGT	CTCTTTCCTTTTGCCACTACAACCATACAATTAAAATCGA	chrX:24056035-24056075	CGGTACATCCATATTCTCGG
chrX_C4	CCGAAGTTATTTAAGGGCGTCAGTGAGCAAAGGTTAAGATGATTATGGGTTTCTGGCCTGCGGTACATCCATATTCTCGG	CCGAAGTTATTTAAGGGCGT	CAGTGAGCAAAGGTTAAGATGATTATGGGTTTCTGGCCTG	chrX:24056077-24056117	CGGTACATCCATATTCTCGG
chrX_C4	CCGAAGTTATTTAAGGGCGTTGCTAACTAATACTTTCCCTATATTTGTCTTCCTTAGTCCCGGTACATCCATATTCTCGG	CCGAAGTTATTTAAGGGCGT	TGCTAACTAATACTTTCCCTATATTTGTCTTCCTTAGTCC	chrX:24056123-24056163	CGGTACATCCATATTCTCGG
chrX_C4	CCGAAGTTATTTAAGGGCGTGGTCCAATACTGAGCTCTGTGGGGTTTAGATCATTATCCTCGGTACATCCATATTCTCGG	CCGAAGTTATTTAAGGGCGT	GGTCCAATACTGAGCTCTGTGGGGTTTAGATCATTATCCT	chrX:24056165-24056205	CGGTACATCCATATTCTCGG
chrX_C4	CCGAAGTTATTTAAGGGCGTGCTCATTACCATAGGACAAAACTTAAGACTGTCAGAGTCACGGTACATCCATATTCTCGG	CCGAAGTTATTTAAGGGCGT	GCTCATTACCATAGGACAAAACTTAAGACTGTCAGAGTCA	chrX:24056207-24056247	CGGTACATCCATATTCTCGG
chrX_C4	CCGAAGTTATTTAAGGGCGTTTTTGTCCTGATTAAATGGGTCCAAACTACCAGAGACAGTCGGTACATCCATATTCTCGG	CCGAAGTTATTTAAGGGCGT	TTTTGTCCTGATTAAATGGGTCCAAACTACCAGAGACAGT	chrX:24056261-24056301	CGGTACATCCATATTCTCGG
chrX_C4	CCGAAGTTATTTAAGGGCGTATTATGAACAGACATCCATTGCTTCTACTTTCTTGTCCTGCGGTACATCCATATTCTCGG	CCGAAGTTATTTAAGGGCGT	ATTATGAACAGACATCCATTGCTTCTACTTTCTTGTCCTG	chrX:24056303-24056343	CGGTACATCCATATTCTCGG
chrX_C4	CCGAAGTTATTTAAGGGCGTGATGGTTGATCCATGTGGTAATGTCAGTTATCTTCAAGGTCGGTACATCCATATTCTCGG	CCGAAGTTATTTAAGGGCGT	GATGGTTGATCCATGTGGTAATGTCAGTTATCTTCAAGGT	chrX:24056345-24056385	CGGTACATCCATATTCTCGG
chrX_C4	CCGAAGTTATTTAAGGGCGTAAAACCACACTGTAGTGTCACTTCCATATTCCTATAAGGACGGTACATCCATATTCTCGG	CCGAAGTTATTTAAGGGCGT	AAAACCACACTGTAGTGTCACTTCCATATTCCTATAAGGA	chrX:24056391-24056431	CGGTACATCCATATTCTCGG
chrX_C4	CCGAAGTTATTTAAGGGCGTGCTAGGATGAGGGTCATAATCCTGAACAGACAATGTCACTCGGTACATCCATATTCTCGG	CCGAAGTTATTTAAGGGCGT	GCTAGGATGAGGGTCATAATCCTGAACAGACAATGTCACT	chrX:24056774-24056814	CGGTACATCCATATTCTCGG
chrX_C4	CCGAAGTTATTTAAGGGCGTGGTCAAGGATATATAACCCATCACACATACTATATAGCCCCGGTACATCCATATTCTCGG	CCGAAGTTATTTAAGGGCGT	GGTCAAGGATATATAACCCATCACACATACTATATAGCCC	chrX:24056857-24056897	CGGTACATCCATATTCTCGG
chrX_C4	CCGAAGTTATTTAAGGGCGTCACTGGCAGCAGTTACTCAGTGTCCCTTTTATAATCTATCCGGTACATCCATATTCTCGG	CCGAAGTTATTTAAGGGCGT	CACTGGCAGCAGTTACTCAGTGTCCCTTTTATAATCTATC	chrX:24056908-24056948	CGGTACATCCATATTCTCGG
chrX_C4	CCGAAGTTATTTAAGGGCGTCCAAAATGTCCTCTGATATAAAAGGAGTATCTCACCAAAACGGTACATCCATATTCTCGG	CCGAAGTTATTTAAGGGCGT	CCAAAATGTCCTCTGATATAAAAGGAGTATCTCACCAAAA	chrX:24056950-24056990	CGGTACATCCATATTCTCGG
chrX_C4	CCGAAGTTATTTAAGGGCGTAAAATGACTGGAGTACTTTTAAACCTTTGAGACAACCTGACGGTACATCCATATTCTCGG	CCGAAGTTATTTAAGGGCGT	AAAATGACTGGAGTACTTTTAAACCTTTGAGACAACCTGA	chrX:24056998-24057038	CGGTACATCCATATTCTCGG
chrX_C4	CCGAAGTTATTTAAGGGCGTCATGTAAATATCTTGTTGTAACCCTTCACTGAATCTGTCCCGGTACATCCATATTCTCGG	CCGAAGTTATTTAAGGGCGT	CATGTAAATATCTTGTTGTAACCCTTCACTGAATCTGTCC	chrX:24057040-24057080	CGGTACATCCATATTCTCGG
chrX_C4	CCGAAGTTATTTAAGGGCGTAAAAGAATGGCTTGACTACCTTTGCCAATGGGACTCTGAACGGTACATCCATATTCTCGG	CCGAAGTTATTTAAGGGCGT	AAAAGAATGGCTTGACTACCTTTGCCAATGGGACTCTGAA	chrX:24057086-24057126	CGGTACATCCATATTCTCGG
chrX_C4	CCGAAGTTATTTAAGGGCGTTTTTCTGGAGGATTCAGTGTCAGAAGAATGGGAGGCACCACGGTACATCCATATTCTCGG	CCGAAGTTATTTAAGGGCGT	TTTTCTGGAGGATTCAGTGTCAGAAGAATGGGAGGCACCA	chrX:24057161-24057201	CGGTACATCCATATTCTCGG
chrX_C4	CCGAAGTTATTTAAGGGCGTAAGGATAAATGTGTTCTATGGTGACTCTCAGGACACATGGCGGTACATCCATATTCTCGG	CCGAAGTTATTTAAGGGCGT	AAGGATAAATGTGTTCTATGGTGACTCTCAGGACACATGG	chrX:24057203-24057243	CGGTACATCCATATTCTCGG
chrX_C4	CCGAAGTTATTTAAGGGCGTGCCTGTTTCTATAAGCCAATGAACTGTCCATTGTTGAGTGCGGTACATCCATATTCTCGG	CCGAAGTTATTTAAGGGCGT	GCCTGTTTCTATAAGCCAATGAACTGTCCATTGTTGAGTG	chrX:24057245-24057285	CGGTACATCCATATTCTCGG
chrX_C4	CCGAAGTTATTTAAGGGCGTCCTTTTACTCTGAGGTAGTATTGTCTGTCTTTGTTATTGACGGTACATCCATATTCTCGG	CCGAAGTTATTTAAGGGCGT	CCTTTTACTCTGAGGTAGTATTGTCTGTCTTTGTTATTGA	chrX:24057555-24057595	CGGTACATCCATATTCTCGG
chrX_C4	CCGAAGTTATTTAAGGGCGTCCCTGTTTCTGTATGCAGTCTATTAGCTTATGTAAATGATCGGTACATCCATATTCTCGG	CCGAAGTTATTTAAGGGCGT	CCCTGTTTCTGTATGCAGTCTATTAGCTTATGTAAATGAT	chrX:24057627-24057667	CGGTACATCCATATTCTCGG
chrX_C4	CCGAAGTTATTTAAGGGCGTCTGGCATTTGTGTTCTCTTAGTGTTAGCGTTCTGCCTAAACGGTACATCCATATTCTCGG	CCGAAGTTATTTAAGGGCGT	CTGGCATTTGTGTTCTCTTAGTGTTAGCGTTCTGCCTAAA	chrX:24057925-24057965	CGGTACATCCATATTCTCGG
chrX_C4	CCGAAGTTATTTAAGGGCGTGTTTGCATCCCACCTCAGCTACCACAAGAAATCAATGCTCCGGTACATCCATATTCTCGG	CCGAAGTTATTTAAGGGCGT	GTTTGCATCCCACCTCAGCTACCACAAGAAATCAATGCTC	chrX:24058001-24058041	CGGTACATCCATATTCTCGG
chrX_C4	CCGAAGTTATTTAAGGGCGTTAGCCCAGAACAGGTAAGCCCCATTCACATGGTCCCAGGTCGGTACATCCATATTCTCGG	CCGAAGTTATTTAAGGGCGT	TAGCCCAGAACAGGTAAGCCCCATTCACATGGTCCCAGGT	chrX:24058043-24058083	CGGTACATCCATATTCTCGG
chrX_C4	CCGAAGTTATTTAAGGGCGTCTCAGAGCTACCCCTGTGTTGTCCTTGAAGATGGTAGACACGGTACATCCATATTCTCGG	CCGAAGTTATTTAAGGGCGT	CTCAGAGCTACCCCTGTGTTGTCCTTGAAGATGGTAGACA	chrX:24058096-24058136	CGGTACATCCATATTCTCGG
chrX_C4	CCGAAGTTATTTAAGGGCGTCACCTTTCCACTAACCTTCATTTTAGAACTCTTCCCATAGCGGTACATCCATATTCTCGG	CCGAAGTTATTTAAGGGCGT	CACCTTTCCACTAACCTTCATTTTAGAACTCTTCCCATAG	chrX:24058138-24058178	CGGTACATCCATATTCTCGG
chrX_C4	CCGAAGTTATTTAAGGGCGTCAAGACAGTTTCTTTCTTGCTGCTGAGAAATTCCCTGGCCCGGTACATCCATATTCTCGG	CCGAAGTTATTTAAGGGCGT	CAAGACAGTTTCTTTCTTGCTGCTGAGAAATTCCCTGGCC	chrX:24058198-24058238	CGGTACATCCATATTCTCGG
chrX_C4	CCGAAGTTATTTAAGGGCGTAGGAAACTACTCTCTGGCTTATGAACATCGACTCTGAGCACGGTACATCCATATTCTCGG	CCGAAGTTATTTAAGGGCGT	AGGAAACTACTCTCTGGCTTATGAACATCGACTCTGAGCA	chrX:24058240-24058280	CGGTACATCCATATTCTCGG
chrX_C4	CCGAAGTTATTTAAGGGCGTAGCTCCCAGCTATTACCTGAAGACCTGGTGGTCTACCATGCGGTACATCCATATTCTCGG	CCGAAGTTATTTAAGGGCGT	AGCTCCCAGCTATTACCTGAAGACCTGGTGGTCTACCATG	chrX:24058282-24058322	CGGTACATCCATATTCTCGG
[truncated: 11,059 more rows]

## Sheet: RNA FISH probes
RNA FISH probe targeting Xist RNA
Probe name	Oligo sequence (5'->3')	F adapter sequence (5'->3')	T sequence (5'->3')	T sequence coordinate in transcript ENSMUST00000127786 (mm39)	R adapter sequence (5'->3')
Xist_C1	GCGAGTGCAAGACTTACGACTGAAAGTATCTGGGCCTGGGGCTAGGACTGGGCTGGGGCAGCGGCTCTTATATACTACCG	GCGAGTGCAAGACTTACGAC	TGAAAGTATCTGGGCCTGGGGCTAGGACTGGGCTGGGGCA	Xist:2988-3028	GCGGCTCTTATATACTACCG
Xist_C1	GCGAGTGCAAGACTTACGACGATTCGAATTTCTCTAAGTAGAAGTGGGCTTGGGATAGGTGCGGCTCTTATATACTACCG	GCGAGTGCAAGACTTACGAC	GATTCGAATTTCTCTAAGTAGAAGTGGGCTTGGGATAGGT	Xist:3029-3069	GCGGCTCTTATATACTACCG
Xist_C1	GCGAGTGCAAGACTTACGACGCTGAGTGATGGACACTGCATTTTAGCACTGAATCAATGAGCGGCTCTTATATACTACCG	GCGAGTGCAAGACTTACGAC	GCTGAGTGATGGACACTGCATTTTAGCACTGAATCAATGA	Xist:3070-3110	GCGGCTCTTATATACTACCG
Xist_C1	GCGAGTGCAAGACTTACGACCAGTATGGAGGGGGTATAGATGGGCTGTCTCAGTCTTATAGCGGCTCTTATATACTACCG	GCGAGTGCAAGACTTACGAC	CAGTATGGAGGGGGTATAGATGGGCTGTCTCAGTCTTATA	Xist:3111-3151	GCGGCTCTTATATACTACCG
Xist_C1	GCGAGTGCAAGACTTACGACGCACTGCATTTTAGCAATACGATTCTATGCATTAAGTGAAGCGGCTCTTATATACTACCG	GCGAGTGCAAGACTTACGAC	GCACTGCATTTTAGCAATACGATTCTATGCATTAAGTGAA	Xist:3170-3210	GCGGCTCTTATATACTACCG
Xist_C1	GCGAGTGCAAGACTTACGACGGTATAGATGGGCTATCTCAGTCTTATAGGCTGAGTGATGGCGGCTCTTATATACTACCG	GCGAGTGCAAGACTTACGAC	GGTATAGATGGGCTATCTCAGTCTTATAGGCTGAGTGATG	Xist:3211-3251	GCGGCTCTTATATACTACCG
Xist_C1	GCGAGTGCAAGACTTACGACATTAAGTGAAACTCCATGACTCTGTAAGTCAGTATGGAGGGCGGCTCTTATATACTACCG	GCGAGTGCAAGACTTACGAC	ATTAAGTGAAACTCCATGACTCTGTAAGTCAGTATGGAGG	Xist:3252-3292	GCGGCTCTTATATACTACCG
Xist_C1	GCGAGTGCAAGACTTACGACCTGAGTTATGGGCACTGCATTTTAGCAATAGGACTGCATGGCGGCTCTTATATACTACCG	GCGAGTGCAAGACTTACGAC	CTGAGTTATGGGCACTGCATTTTAGCAATAGGACTGCATG	Xist:3293-3333	GCGGCTCTTATATACTACCG
Xist_C1	GCGAGTGCAAGACTTACGACAGGGGGTATGGGGTATAAATGGGCTATCTCAGTCTTATAGGCGGCTCTTATATACTACCG	GCGAGTGCAAGACTTACGAC	AGGGGGTATGGGGTATAAATGGGCTATCTCAGTCTTATAG	Xist:3334-3374	GCGGCTCTTATATACTACCG
Xist_C1	GCGAGTGCAAGACTTACGACATGTATTAAGTGAAATTCCATGACCCTAGAAGTCAGTATGGCGGCTCTTATATACTACCG	GCGAGTGCAAGACTTACGAC	ATGTATTAAGTGAAATTCCATGACCCTAGAAGTCAGTATG	Xist:3375-3415	GCGGCTCTTATATACTACCG
Xist_C1	GCGAGTGCAAGACTTACGACTAGACTGAGTGATGGACACTGCATTTTAGCAATACGATTCGCGGCTCTTATATACTACCG	GCGAGTGCAAGACTTACGAC	TAGACTGAGTGATGGACACTGCATTTTAGCAATACGATTC	Xist:3416-3456	GCGGCTCTTATATACTACCG
Xist_C1	GCGAGTGCAAGACTTACGACTGGAGGGAGTATGGGGTATACATAGGGATATCTCAGTCTTGCGGCTCTTATATACTACCG	GCGAGTGCAAGACTTACGAC	TGGAGGGAGTATGGGGTATACATAGGGATATCTCAGTCTT	Xist:3457-3497	GCGGCTCTTATATACTACCG
Xist_C1	GCGAGTGCAAGACTTACGACGGACCGTATGCAAAGTGAAATTCTATGACTCTGGAAGTCAGCGGCTCTTATATACTACCG	GCGAGTGCAAGACTTACGAC	GGACCGTATGCAAAGTGAAATTCTATGACTCTGGAAGTCA	Xist:3500-3540	GCGGCTCTTATATACTACCG
Xist_C1	GCGAGTGCAAGACTTACGACAGTCTTATAGACTGAGTGATGGACACTGCATTTTAGCAATGCGGCTCTTATATACTACCG	GCGAGTGCAAGACTTACGAC	AGTCTTATAGACTGAGTGATGGACACTGCATTTTAGCAAT	Xist:3541-3581	GCGGCTCTTATATACTACCG
Xist_C1	GCGAGTGCAAGACTTACGACGTCAGTATGGAGGGAGTATGGGGTATACATAGGGATATCTGCGGCTCTTATATACTACCG	GCGAGTGCAAGACTTACGAC	GTCAGTATGGAGGGAGTATGGGGTATACATAGGGATATCT	Xist:3582-3622	GCGGCTCTTATATACTACCG
Xist_C1	GCGAGTGCAAGACTTACGACCAATAGGACCGTATGCAAAGTGAAATTCTATGACTCTGGAGCGGCTCTTATATACTACCG	GCGAGTGCAAGACTTACGAC	CAATAGGACCGTATGCAAAGTGAAATTCTATGACTCTGGA	Xist:3623-3663	GCGGCTCTTATATACTACCG
Xist_C1	GCGAGTGCAAGACTTACGACATCTCAGTCTTATAGGCTGAGTGATGGGCACTGCATTTTAGCGGCTCTTATATACTACCG	GCGAGTGCAAGACTTACGAC	ATCTCAGTCTTATAGGCTGAGTGATGGGCACTGCATTTTA	Xist:3664-3704	GCGGCTCTTATATACTACCG
Xist_C1	GCGAGTGCAAGACTTACGACCATGACTCTGGAAGTCAGTATGGAGGGGGTATAGATGGGCGCGGCTCTTATATACTACCG	GCGAGTGCAAGACTTACGAC	CATGACTCTGGAAGTCAGTATGGAGGGGGTATAGATGGGC	Xist:3705-3745	GCGGCTCTTATATACTACCG
Xist_C1	GCGAGTGCAAGACTTACGACCTGCATTTTAGCAATAGGACTGCATGCATTAAGTGAAATTGCGGCTCTTATATACTACCG	GCGAGTGCAAGACTTACGAC	CTGCATTTTAGCAATAGGACTGCATGCATTAAGTGAAATT	Xist:3746-3786	GCGGCTCTTATATACTACCG
Xist_C1	GCGAGTGCAAGACTTACGACATAGATGGGCTATCTCAGTCTTATAGGCTGAGTGATGGGCGCGGCTCTTATATACTACCG	GCGAGTGCAAGACTTACGAC	ATAGATGGGCTATCTCAGTCTTATAGGCTGAGTGATGGGC	Xist:3787-3827	GCGGCTCTTATATACTACCG
Xist_C1	GCGAGTGCAAGACTTACGACATTCCATGACTCTGGAAGTCAGTATGGAGGGGGTATGGGGGCGGCTCTTATATACTACCG	GCGAGTGCAAGACTTACGAC	ATTCCATGACTCTGGAAGTCAGTATGGAGGGGGTATGGGG	Xist:3828-3868	GCGGCTCTTATATACTACCG
Xist_C1	GCGAGTGCAAGACTTACGACGGCACTGCATTTTAGCAATAGGACTGCATGCATTAAGTGAGCGGCTCTTATATACTACCG	GCGAGTGCAAGACTTACGAC	GGCACTGCATTTTAGCAATAGGACTGCATGCATTAAGTGA	Xist:3869-3909	GCGGCTCTTATATACTACCG
Xist_C1	GCGAGTGCAAGACTTACGACGGGTATAGATGGGCTATCTCAGTCTTATAGGCTGAGTGATGCGGCTCTTATATACTACCG	GCGAGTGCAAGACTTACGAC	GGGTATAGATGGGCTATCTCAGTCTTATAGGCTGAGTGAT	Xist:3910-3950	GCGGCTCTTATATACTACCG
Xist_C1	GCGAGTGCAAGACTTACGACCATTAAGTGAAATTCCATGACTCTGGAAGTCAGTATGGAGGCGGCTCTTATATACTACCG	GCGAGTGCAAGACTTACGAC	CATTAAGTGAAATTCCATGACTCTGGAAGTCAGTATGGAG	Xist:3951-3991	GCGGCTCTTATATACTACCG
Xist_C1	GCGAGTGCAAGACTTACGACGCTGAGTGATGGGCACTGCATTTTAGCAATAGGACTGCATGCGGCTCTTATATACTACCG	GCGAGTGCAAGACTTACGAC	GCTGAGTGATGGGCACTGCATTTTAGCAATAGGACTGCAT	Xist:3992-4032	GCGGCTCTTATATACTACCG
Xist_C1	GCGAGTGCAAGACTTACGACCAGTATGGAGTGGGTATAGATGGGCTATCTCAGTCTTATAGCGGCTCTTATATACTACCG	GCGAGTGCAAGACTTACGAC	CAGTATGGAGTGGGTATAGATGGGCTATCTCAGTCTTATA	Xist:4033-4073	GCGGCTCTTATATACTACCG
Xist_C1	GCGAGTGCAAGACTTACGACAGGACTGCATGCATTAAGTGAAACTCCATGACTCTGGAAGGCGGCTCTTATATACTACCG	GCGAGTGCAAGACTTACGAC	AGGACTGCATGCATTAAGTGAAACTCCATGACTCTGGAAG	Xist:4074-4114	GCGGCTCTTATATACTACCG
Xist_C1	GCGAGTGCAAGACTTACGACCAGTCTTATAGGCTGAGTTATGGGCACTGCATTTTAGCAAGCGGCTCTTATATACTACCG	GCGAGTGCAAGACTTACGAC	CAGTCTTATAGGCTGAGTTATGGGCACTGCATTTTAGCAA	Xist:4115-4155	GCGGCTCTTATATACTACCG
Xist_C1	GCGAGTGCAAGACTTACGACAAGTCAGTATGGAGGGGGTATGGGGTATAAATGGGCTATCGCGGCTCTTATATACTACCG	GCGAGTGCAAGACTTACGAC	AAGTCAGTATGGAGGGGGTATGGGGTATAAATGGGCTATC	Xist:4156-4196	GCGGCTCTTATATACTACCG
Xist_C1	GCGAGTGCAAGACTTACGACCAATACGATTCTATGCATTAAGTGAAATTCCATGACCCTAGCGGCTCTTATATACTACCG	GCGAGTGCAAGACTTACGAC	CAATACGATTCTATGCATTAAGTGAAATTCCATGACCCTA	Xist:4197-4237	GCGGCTCTTATATACTACCG
Xist_C1	GCGAGTGCAAGACTTACGACATCTCAGTCTTATAGGCTGAGTAATGGACACTGCATTTTAGCGGCTCTTATATACTACCG	GCGAGTGCAAGACTTACGAC	ATCTCAGTCTTATAGGCTGAGTAATGGACACTGCATTTTA	Xist:4238-4278	GCGGCTCTTATATACTACCG
Xist_C1	GCGAGTGCAAGACTTACGACTGGAAGTCAGTATGGAGGGGGTATGGGGTATACATAGGGAGCGGCTCTTATATACTACCG	GCGAGTGCAAGACTTACGAC	TGGAAGTCAGTATGGAGGGGGTATGGGGTATACATAGGGA	Xist:4279-4319	GCGGCTCTTATATACTACCG
Xist_C1	GCGAGTGCAAGACTTACGACTTTAGCAATAGGACCGTATGCAAAGTGAAATTCTATGTCTGCGGCTCTTATATACTACCG	GCGAGTGCAAGACTTACGAC	TTTAGCAATAGGACCGTATGCAAAGTGAAATTCTATGTCT	Xist:4320-4360	GCGGCTCTTATATACTACCG
Xist_C1	GCGAGTGCAAGACTTACGACGGGATATCTCAGTCTTATAGGCTGAGTGATGGGCACTGCAGCGGCTCTTATATACTACCG	GCGAGTGCAAGACTTACGAC	GGGATATCTCAGTCTTATAGGCTGAGTGATGGGCACTGCA	Xist:4361-4401	GCGGCTCTTATATACTACCG
Xist_C1	GCGAGTGCAAGACTTACGACGACTCTGGAAGTCAGTATGGAGGGGGTAGAGGGTATAGATGCGGCTCTTATATACTACCG	GCGAGTGCAAGACTTACGAC	GACTCTGGAAGTCAGTATGGAGGGGGTAGAGGGTATAGAT	Xist:4402-4442	GCGGCTCTTATATACTACCG
Xist_C1	GCGAGTGCAAGACTTACGACGGGCACTGCATTTTAGCAATAGAAATCTATACATTATGTGGCGGCTCTTATATACTACCG	GCGAGTGCAAGACTTACGAC	GGGCACTGCATTTTAGCAATAGAAATCTATACATTATGTG	Xist:4451-4491	GCGGCTCTTATATACTACCG
Xist_C1	GCGAGTGCAAGACTTACGACGGGGTATAGATGGGCTATCTCAGTCTTATAGGCTGAGTTAGCGGCTCTTATATACTACCG	GCGAGTGCAAGACTTACGAC	GGGGTATAGATGGGCTATCTCAGTCTTATAGGCTGAGTTA	Xist:4492-4532	GCGGCTCTTATATACTACCG
[truncated: 143 more rows]

## Sheet: Detection oligos
Detection oligos used for DNA and RNA FISH
[truncated: 5 more rows]
